# Supplementary material for: Tight Junction-high and CDH17-positive cell population is the Source of Colorectal Cancer Liver Metastases
Source: Research Square preprint supplement (doi:10.21203/rs.3.rs-6998644/v1), 2025-07-09
Supplement: Supplementary file 1 [file 3b249b53779fe74f464c20d9.xlsx]

## Sheet: combined_protein Raw Data
Protein	Protein ID	Entry Name	Gene	Protein Length	Organism	Protein Existence	Description	Protein Probability	Top Peptide Probability	Combined Total Peptides	Combined Spectral Count	Combined Unique Spectral Count	Combined Total Spectral Count	240820IB_DGomezBarca_ko1_S1_A7_1_20827 Spectral Count	240820IB_DGomezBarca_ko1_S1_A8_1_20828 Spectral Count	240820IB_DGomezBarca_ko2_S1_A10_1_20834 Spectral Count	240820IB_DGomezBarca_ko2_S1_A9_1_20833 Spectral Count	240820IB_DGomezBarca_ko3_S1_A11_1_20831 Spectral Count	240820IB_DGomezBarca_ko3_S1_A12_1_20832 Spectral Count	240820IB_DGomezBarca_wt1_S1_A1_1_20821 Spectral Count	240820IB_DGomezBarca_wt1_S1_A2_1_20822 Spectral Count	240820IB_DGomezBarca_wt2_S1_A3_1_20823 Spectral Count	240820IB_DGomezBarca_wt2_S1_A4_1_20824 Spectral Count	240820IB_DGomezBarca_wt3_S1_A5_1_20825 Spectral Count	240820IB_DGomezBarca_wt3_S1_A6_1_20826 Spectral Count	240820IB_DGomezBarca_ko1_S1_A7_1_20827 Unique Spectral Count	240820IB_DGomezBarca_ko1_S1_A8_1_20828 Unique Spectral Count	240820IB_DGomezBarca_ko2_S1_A10_1_20834 Unique Spectral Count	240820IB_DGomezBarca_ko2_S1_A9_1_20833 Unique Spectral Count	240820IB_DGomezBarca_ko3_S1_A11_1_20831 Unique Spectral Count	240820IB_DGomezBarca_ko3_S1_A12_1_20832 Unique Spectral Count	240820IB_DGomezBarca_wt1_S1_A1_1_20821 Unique Spectral Count	240820IB_DGomezBarca_wt1_S1_A2_1_20822 Unique Spectral Count	240820IB_DGomezBarca_wt2_S1_A3_1_20823 Unique Spectral Count	240820IB_DGomezBarca_wt2_S1_A4_1_20824 Unique Spectral Count	240820IB_DGomezBarca_wt3_S1_A5_1_20825 Unique Spectral Count	240820IB_DGomezBarca_wt3_S1_A6_1_20826 Unique Spectral Count	240820IB_DGomezBarca_ko1_S1_A7_1_20827 Total Spectral Count	240820IB_DGomezBarca_ko1_S1_A8_1_20828 Total Spectral Count	240820IB_DGomezBarca_ko2_S1_A10_1_20834 Total Spectral Count	240820IB_DGomezBarca_ko2_S1_A9_1_20833 Total Spectral Count	240820IB_DGomezBarca_ko3_S1_A11_1_20831 Total Spectral Count	240820IB_DGomezBarca_ko3_S1_A12_1_20832 Total Spectral Count	240820IB_DGomezBarca_wt1_S1_A1_1_20821 Total Spectral Count	240820IB_DGomezBarca_wt1_S1_A2_1_20822 Total Spectral Count	240820IB_DGomezBarca_wt2_S1_A3_1_20823 Total Spectral Count	240820IB_DGomezBarca_wt2_S1_A4_1_20824 Total Spectral Count	240820IB_DGomezBarca_wt3_S1_A5_1_20825 Total Spectral Count	240820IB_DGomezBarca_wt3_S1_A6_1_20826 Total Spectral Count
sp|A0A0B4J2D5|GAL3B_HUMAN	A0A0B4J2D5	GAL3B_HUMAN	GATD3B	268	Homo sapiens	5:Protein uncertain	Putative glutamine amidotransferase-like class 1 domain-containing protein 3B, mitochondrial	1	0.999	6	113	0	113	5	9	4	6	12	8	9	7	11	14	13	15	0	0	0	0	0	0	0	0	0	0	0	0	5	9	4	6	12	8	9	7	11	14	13	15
sp|A0A0K0K1C4|TVB27_HUMAN	A0A0K0K1C4	TVB27_HUMAN	TRBV27	114	Homo sapiens	3:Protein inferred from homology	T cell receptor beta variable 27	0.6407	0.9901	1	1	1	1	0	0	0	0	0	0	0	0	0	0	1	0	0	0	0	0	0	0	0	0	0	0	1	0	0	0	0	0	0	0	0	0	0	0	1	0
sp|A0A0U1RRL7|MMPOS_HUMAN	A0A0U1RRL7	MMPOS_HUMAN	MMP24OS	71	Homo sapiens	1:Experimental evidence at protein level	Protein MMP24OS	0.7848	0.9951	1	2	2	2	0	0	1	0	0	1	0	0	0	0	0	0	0	0	1	0	0	1	0	0	0	0	0	0	0	0	1	0	0	1	0	0	0	0	0	0
sp|A0A2R8Y619|H2BK1_HUMAN	A0A2R8Y619	H2BK1_HUMAN	H2BK1	122	Homo sapiens	3:Protein inferred from homology	Histone H2B type 2-K1	0.9872	0.9966	3	3	3	76	0	0	1	0	0	0	0	1	0	1	0	0	0	0	1	0	0	0	0	1	0	1	0	0	3	4	5	4	5	4	8	14	5	9	9	6
sp|A0A3B3IU46|RMACL_HUMAN	A0A3B3IU46	RMACL_HUMAN	RAMACL	118	Homo sapiens	3:Protein inferred from homology	RNA guanine-N7 methyltransferase-activating subunit-like protein	1	0.999	2	13	0	13	1	1	1	1	1	0	1	1	1	1	1	3	0	0	0	0	0	0	0	0	0	0	0	0	1	1	1	1	1	0	1	1	1	1	1	3
sp|A0AV96-2|RBM47_HUMAN	A0AV96-2	RBM47_HUMAN	RBM47	524	Homo sapiens		Isoform 2 of RNA-binding protein 47	1	0.999	8	69	0	69	6	8	2	3	7	6	6	6	7	6	6	6	0	0	0	0	0	0	0	0	0	0	0	0	6	8	2	3	7	6	6	6	7	6	6	6
sp|A0AVT1|UBA6_HUMAN	A0AVT1	UBA6_HUMAN	UBA6	1052	Homo sapiens	1:Experimental evidence at protein level	Ubiquitin-like modifier-activating enzyme 6	1	0.999	11	92	0	92	8	9	6	6	14	9	5	6	6	8	9	6	0	0	0	0	0	0	0	0	0	0	0	0	8	9	6	6	14	9	5	6	6	8	9	6
sp|A0FGR8-2|ESYT2_HUMAN	A0FGR8-2	ESYT2_HUMAN	ESYT2	893	Homo sapiens		Isoform 2 of Extended synaptotagmin-2	1	0.999	7	33	0	33	1	3	5	6	1	6	3	2	1	2	1	2	0	0	0	0	0	0	0	0	0	0	0	0	1	3	5	6	1	6	3	2	1	2	1	2
sp|A0MZ66-2|SHOT1_HUMAN	A0MZ66-2	SHOT1_HUMAN	SHTN1	456	Homo sapiens		Isoform 2 of Shootin-1	1	0.999	3	10	0	10	0	0	2	1	1	1	0	0	1	0	2	2	0	0	0	0	0	0	0	0	0	0	0	0	0	0	2	1	1	1	0	0	1	0	2	2
sp|A1A5D9-2|BICL2_HUMAN	A1A5D9-2	BICL2_HUMAN	BICDL2	301	Homo sapiens		Isoform 2 of BICD family-like cargo adapter 2	1	0.999	4	6	0	6	1	0	4	0	1	0	0	0	0	0	0	0	0	0	0	0	0	0	0	0	0	0	0	0	1	0	4	0	1	0	0	0	0	0	0	0
sp|A1IGU5|ARH37_HUMAN	A1IGU5	ARH37_HUMAN	ARHGEF37	675	Homo sapiens	2:Experimental evidence at transcript level	Rho guanine nucleotide exchange factor 37	0.8854	0.9977	1	2	2	2	0	0	0	0	0	1	0	0	0	0	0	1	0	0	0	0	0	1	0	0	0	0	0	1	0	0	0	0	0	1	0	0	0	0	0	1
sp|A1L0T0|HACL2_HUMAN	A1L0T0	HACL2_HUMAN	ILVBL	632	Homo sapiens	1:Experimental evidence at protein level	2-hydroxyacyl-CoA lyase 2	1	0.999	5	31	31	31	1	1	4	2	4	2	1	2	4	3	4	3	1	1	4	2	4	2	1	2	4	3	4	3	1	1	4	2	4	2	1	2	4	3	4	3
sp|A1L390-3|PKHG3_HUMAN	A1L390-3	PKHG3_HUMAN	PLEKHG3	1163	Homo sapiens		Isoform 3 of Pleckstrin homology domain-containing family G member 3	1	0.999	5	15	0	15	0	1	4	6	1	0	0	1	0	0	1	1	0	0	0	0	0	0	0	0	0	0	0	0	0	1	4	6	1	0	0	1	0	0	1	1
sp|A2RUC4-2|TYW5_HUMAN	A2RUC4-2	TYW5_HUMAN	TYW5	152	Homo sapiens		Isoform 2 of tRNA wybutosine-synthesizing protein 5	0.942	0.9989	1	2	0	2	0	0	1	1	0	0	0	0	0	0	0	0	0	0	0	0	0	0	0	0	0	0	0	0	0	0	1	1	0	0	0	0	0	0	0	0
sp|A2RUS2-2|DEND3_HUMAN	A2RUS2-2	DEND3_HUMAN	DENND3	1146	Homo sapiens		Isoform 2 of DENN domain-containing protein 3	0.6681	0.9912	1	13	0	13	0	2	0	0	2	2	3	1	1	1	1	0	0	0	0	0	0	0	0	0	0	0	0	0	0	2	0	0	2	2	3	1	1	1	1	0
sp|A3KMH1-3|VWA8_HUMAN	A3KMH1-3	VWA8_HUMAN	VWA8	1809	Homo sapiens		Isoform 3 of von Willebrand factor A domain-containing protein 8	1	0.999	5	12	0	12	1	0	2	1	2	0	0	1	1	1	2	1	0	0	0	0	0	0	0	0	0	0	0	0	1	0	2	1	2	0	0	1	1	1	2	1
sp|A4D1E9-2|GTPBA_HUMAN	A4D1E9-2	GTPBA_HUMAN	GTPBP10	308	Homo sapiens		Isoform 2 of GTP-binding protein 10	0.8032	0.9956	1	2	0	2	0	0	0	0	2	0	0	0	0	0	0	0	0	0	0	0	0	0	0	0	0	0	0	0	0	0	0	0	2	0	0	0	0	0	0	0
sp|A4FU01-4|MTMRB_HUMAN	A4FU01-4	MTMRB_HUMAN	MTMR11	640	Homo sapiens		Isoform 4 of Myotubularin-related protein 11	0.7491	0.9941	1	1	0	1	0	0	0	1	0	0	0	0	0	0	0	0	0	0	0	0	0	0	0	0	0	0	0	0	0	0	0	1	0	0	0	0	0	0	0	0
sp|A5PLL7-2|PDES1_HUMAN	A5PLL7-2	PDES1_HUMAN	PEDS1	267	Homo sapiens		Isoform 2 of Plasmanylethanolamine desaturase	0.9469	0.999	1	3	0	3	0	0	1	1	0	1	0	0	0	0	0	0	0	0	0	0	0	0	0	0	0	0	0	0	0	0	1	1	0	1	0	0	0	0	0	0
sp|A5YKK6-2|CNOT1_HUMAN	A5YKK6-2	CNOT1_HUMAN	CNOT1	2371	Homo sapiens		Isoform 2 of CCR4-NOT transcription complex subunit 1	1	0.999	11	60	0	60	4	2	10	6	4	5	5	5	5	5	6	3	0	0	0	0	0	0	0	0	0	0	0	0	4	2	10	6	4	5	5	5	5	5	6	3
sp|A6NDG6|PGP_HUMAN	A6NDG6	PGP_HUMAN	PGP	321	Homo sapiens	1:Experimental evidence at protein level	Glycerol-3-phosphate phosphatase	0.9454	0.999	1	1	1	1	0	0	0	0	0	0	0	0	0	0	0	1	0	0	0	0	0	0	0	0	0	0	0	1	0	0	0	0	0	0	0	0	0	0	0	1
sp|A6NDU8|RIMC1_HUMAN	A6NDU8	RIMC1_HUMAN	RIMOC1	294	Homo sapiens	1:Experimental evidence at protein level	RAB7A-interacting MON1-CCZ1 complex subunit 1	1	0.999	2	7	7	7	0	0	1	1	1	3	0	1	0	0	0	0	0	0	1	1	1	3	0	1	0	0	0	0	0	0	1	1	1	3	0	1	0	0	0	0
sp|A6NES4|MRO2A_HUMAN	A6NES4	MRO2A_HUMAN	MROH2A	1674	Homo sapiens	4:Protein predicted	Maestro heat-like repeat-containing protein family member 2A	0.6511	0.9905	1	1	1	1	0	0	0	0	0	0	0	0	0	1	0	0	0	0	0	0	0	0	0	0	0	1	0	0	0	0	0	0	0	0	0	0	0	1	0	0
sp|A6NHG4|DDTL_HUMAN	A6NHG4	DDTL_HUMAN	DDTL	134	Homo sapiens	2:Experimental evidence at transcript level	D-dopachrome decarboxylase-like protein	1	0.999	4	67	0	67	9	6	9	5	7	9	3	3	3	3	6	4	0	0	0	0	0	0	0	0	0	0	0	0	9	6	9	5	7	9	3	3	3	3	6	4
sp|A6NHL2-2|TBAL3_HUMAN	A6NHL2-2	TBAL3_HUMAN	TUBAL3	406	Homo sapiens		Isoform 2 of Tubulin alpha chain-like 3	0.9985	0.999	3	7	0	31	2	2	0	0	0	0	0	0	3	0	0	0	0	0	0	0	0	0	0	0	0	0	0	0	5	5	2	0	2	1	0	0	6	3	3	4
sp|A6NHR9-2|SMHD1_HUMAN	A6NHR9-2	SMHD1_HUMAN	SMCHD1	1917	Homo sapiens		Isoform 2 of Structural maintenance of chromosomes flexible hinge domain-containing protein 1	1	0.999	7	58	0	58	4	3	9	2	4	8	5	4	6	4	5	4	0	0	0	0	0	0	0	0	0	0	0	0	4	3	9	2	4	8	5	4	6	4	5	4
sp|A6NJ78-2|MET15_HUMAN	A6NJ78-2	MET15_HUMAN	METTL15	273	Homo sapiens		Isoform 2 of 12S rRNA N4-methylcytidine (m4C) methyltransferase	0.9467	0.999	1	1	0	1	0	0	1	0	0	0	0	0	0	0	0	0	0	0	0	0	0	0	0	0	0	0	0	0	0	0	1	0	0	0	0	0	0	0	0	0
sp|A6NKD9|CC85C_HUMAN	A6NKD9	CC85C_HUMAN	CCDC85C	419	Homo sapiens	1:Experimental evidence at protein level	Coiled-coil domain-containing protein 85C	0.9292	0.9986	1	4	4	4	0	0	0	1	0	0	0	0	1	1	1	0	0	0	0	1	0	0	0	0	1	1	1	0	0	0	0	1	0	0	0	0	1	1	1	0
sp|A8CG34|P121C_HUMAN	A8CG34	P121C_HUMAN	POM121C	1229	Homo sapiens	1:Experimental evidence at protein level	Nuclear envelope pore membrane protein POM 121C	1	0.9988	2	3	0	3	0	0	1	1	0	0	0	0	0	1	0	0	0	0	0	0	0	0	0	0	0	0	0	0	0	0	1	1	0	0	0	0	0	1	0	0
sp|A8MWD9|RUXGL_HUMAN	A8MWD9	RUXGL_HUMAN	SNRPGP15	76	Homo sapiens	5:Protein uncertain	Putative small nuclear ribonucleoprotein G-like protein 15	0.8603	0.9971	1	11	0	11	1	1	0	0	1	0	0	0	2	1	1	4	0	0	0	0	0	0	0	0	0	0	0	0	1	1	0	0	1	0	0	0	2	1	1	4
sp|A8MXV4|NUD19_HUMAN	A8MXV4	NUD19_HUMAN	NUDT19	375	Homo sapiens	1:Experimental evidence at protein level	Acyl-coenzyme A diphosphatase NUDT19	1	0.9989	3	8	8	8	0	0	2	2	0	0	1	0	1	1	0	1	0	0	2	2	0	0	1	0	1	1	0	1	0	0	2	2	0	0	1	0	1	1	0	1
sp|B7ZAP0|RBG10_HUMAN	B7ZAP0	RBG10_HUMAN	RABGAP1L	253	Homo sapiens	1:Experimental evidence at protein level	Rab GTPase-activating protein 1-like, isoform 10	0.9962	0.999	2	4	0	13	0	0	0	0	0	1	0	0	1	0	2	0	0	0	0	0	0	0	0	0	0	0	0	0	0	2	1	1	1	2	2	1	1	0	2	0
sp|C4AMC7|WASH3_HUMAN	C4AMC7	WASH3_HUMAN	WASH3P	463	Homo sapiens	1:Experimental evidence at protein level	Putative WAS protein family homolog 3	1	0.999	3	5	0	5	1	0	0	0	2	0	0	0	1	0	0	1	0	0	0	0	0	0	0	0	0	0	0	0	1	0	0	0	2	0	0	0	1	0	0	1
sp|E9PAV3-2|NACAM_HUMAN	E9PAV3-2	NACAM_HUMAN	NACA	925	Homo sapiens		Isoform skNAC-2 of Nascent polypeptide-associated complex subunit alpha, muscle-specific form	1	0.999	2	48	0	48	7	5	2	2	4	5	5	3	4	3	4	4	0	0	0	0	0	0	0	0	0	0	0	0	7	5	2	2	4	5	5	3	4	3	4	4
sp|E9PRG8|CK098_HUMAN	E9PRG8	CK098_HUMAN	C11orf98	123	Homo sapiens	4:Protein predicted	Uncharacterized protein C11orf98	0.9469	0.999	1	2	2	2	1	0	0	0	0	0	0	0	0	0	1	0	1	0	0	0	0	0	0	0	0	0	1	0	1	0	0	0	0	0	0	0	0	0	1	0
sp|O00116|ADAS_HUMAN	O00116	ADAS_HUMAN	AGPS	658	Homo sapiens	1:Experimental evidence at protein level	Alkyldihydroxyacetonephosphate synthase, peroxisomal	1	0.999	14	114	114	114	8	9	10	9	10	10	8	8	9	11	14	8	8	9	10	9	10	10	8	8	9	11	14	8	8	9	10	9	10	10	8	8	9	11	14	8
sp|O00148|DX39A_HUMAN	O00148	DX39A_HUMAN	DDX39A	427	Homo sapiens	1:Experimental evidence at protein level	ATP-dependent RNA helicase DDX39A	1	0.999	13	48	25	149	2	4	0	3	2	1	4	7	3	6	9	7	0	1	0	3	0	0	2	5	1	4	5	4	9	15	7	10	10	8	12	17	12	14	19	16
sp|O00151|PDLI1_HUMAN	O00151	PDLI1_HUMAN	PDLIM1	329	Homo sapiens	1:Experimental evidence at protein level	PDZ and LIM domain protein 1	1	0.999	9	105	105	105	14	15	5	10	16	9	6	5	4	5	8	8	14	15	5	10	16	9	6	5	4	5	8	8	14	15	5	10	16	9	6	5	4	5	8	8
sp|O00154-4|BACH_HUMAN	O00154-4	BACH_HUMAN	ACOT7	338	Homo sapiens		Isoform 4 of Cytosolic acyl coenzyme A thioester hydrolase	1	0.999	4	59	0	59	6	3	4	5	5	4	3	6	5	7	4	7	0	0	0	0	0	0	0	0	0	0	0	0	6	3	4	5	5	4	3	6	5	7	4	7
sp|O00159-2|MYO1C_HUMAN	O00159-2	MYO1C_HUMAN	MYO1C	1028	Homo sapiens		Isoform 2 of Unconventional myosin-Ic	1	0.999	8	58	0	58	4	4	5	8	5	7	1	5	8	3	2	6	0	0	0	0	0	0	0	0	0	0	0	0	4	4	5	8	5	7	1	5	8	3	2	6
sp|O00161-2|SNP23_HUMAN	O00161-2	SNP23_HUMAN	SNAP23	158	Homo sapiens		Isoform SNAP-23b of Synaptosomal-associated protein 23	0.9869	0.999	3	11	1	11	1	0	2	4	1	1	0	0	1	0	0	1	1	0	0	0	0	0	0	0	0	0	0	0	1	0	2	4	1	1	0	0	1	0	0	1
sp|O00170|AIP_HUMAN	O00170	AIP_HUMAN	AIP	330	Homo sapiens	1:Experimental evidence at protein level	AH receptor-interacting protein	1	0.999	5	42	42	42	3	5	1	2	3	4	0	6	5	4	5	4	3	5	1	2	3	4	0	6	5	4	5	4	3	5	1	2	3	4	0	6	5	4	5	4
sp|O00178|GTPB1_HUMAN	O00178	GTPB1_HUMAN	GTPBP1	669	Homo sapiens	1:Experimental evidence at protein level	GTP-binding protein 1	1	0.999	6	29	29	29	2	1	5	3	2	2	0	3	4	4	1	2	2	1	5	3	2	2	0	3	4	4	1	2	2	1	5	3	2	2	0	3	4	4	1	2
sp|O00186|STXB3_HUMAN	O00186	STXB3_HUMAN	STXBP3	592	Homo sapiens	1:Experimental evidence at protein level	Syntaxin-binding protein 3	1	0.999	4	31	31	31	3	3	2	2	2	3	2	1	1	3	5	4	3	3	2	2	2	3	2	1	1	3	5	4	3	3	2	2	2	3	2	1	1	3	5	4
sp|O00193|SMAP_HUMAN	O00193	SMAP_HUMAN	SMAP	183	Homo sapiens	1:Experimental evidence at protein level	Small acidic protein	1	0.999	2	35	35	35	2	2	1	1	4	4	8	2	3	3	3	2	2	2	1	1	4	4	8	2	3	3	3	2	2	2	1	1	4	4	8	2	3	3	3	2
sp|O00194|RB27B_HUMAN	O00194	RB27B_HUMAN	RAB27B	218	Homo sapiens	1:Experimental evidence at protein level	Ras-related protein Rab-27B	1	0.999	4	15	15	15	3	4	1	1	5	1	0	0	0	0	0	0	3	4	1	1	5	1	0	0	0	0	0	0	3	4	1	1	5	1	0	0	0	0	0	0
sp|O00203-3|AP3B1_HUMAN	O00203-3	AP3B1_HUMAN	AP3B1	1045	Homo sapiens		Isoform 2 of AP-3 complex subunit beta-1	1	0.999	4	38	0	38	4	2	4	3	3	7	0	2	4	4	3	2	0	0	0	0	0	0	0	0	0	0	0	0	4	2	4	3	3	7	0	2	4	4	3	2
sp|O00204-2|ST2B1_HUMAN	O00204-2	ST2B1_HUMAN	SULT2B1	350	Homo sapiens		Isoform 2 of Sulfotransferase 2B1	1	0.999	3	35	0	35	4	2	6	4	3	3	3	2	2	2	1	3	0	0	0	0	0	0	0	0	0	0	0	0	4	2	6	4	3	3	3	2	2	2	1	3
sp|O00214-2|LEG8_HUMAN	O00214-2	LEG8_HUMAN	LGALS8	359	Homo sapiens		Isoform 2 of Galectin-8	1	0.9987	2	3	1	3	0	1	1	0	1	0	0	0	0	0	0	0	0	0	1	0	0	0	0	0	0	0	0	0	0	1	1	0	1	0	0	0	0	0	0	0
sp|O00217|NDUS8_HUMAN	O00217	NDUS8_HUMAN	NDUFS8	210	Homo sapiens	1:Experimental evidence at protein level	NADH dehydrogenase [ubiquinone] iron-sulfur protein 8, mitochondrial	1	0.999	3	37	37	37	3	3	1	1	5	3	2	2	7	4	3	3	3	3	1	1	5	3	2	2	7	4	3	3	3	3	1	1	5	3	2	2	7	4	3	3
sp|O00220|TR10A_HUMAN	O00220	TR10A_HUMAN	TNFRSF10A	468	Homo sapiens	1:Experimental evidence at protein level	Tumor necrosis factor receptor superfamily member 10A	0.9046	0.9981	1	2	2	2	0	0	2	0	0	0	0	0	0	0	0	0	0	0	2	0	0	0	0	0	0	0	0	0	0	0	2	0	0	0	0	0	0	0	0	0
sp|O00231-2|PSD11_HUMAN	O00231-2	PSD11_HUMAN	PSMD11	423	Homo sapiens		Isoform 2 of 26S proteasome non-ATPase regulatory subunit 11	1	0.999	10	89	0	89	8	9	7	6	12	9	4	4	7	9	9	5	0	0	0	0	0	0	0	0	0	0	0	0	8	9	7	6	12	9	4	4	7	9	9	5
sp|O00232|PSD12_HUMAN	O00232	PSD12_HUMAN	PSMD12	456	Homo sapiens	1:Experimental evidence at protein level	26S proteasome non-ATPase regulatory subunit 12	1	0.999	8	76	13	76	9	16	5	6	8	3	7	2	7	4	4	5	1	2	0	0	1	1	2	0	1	2	1	2	9	16	5	6	8	3	7	2	7	4	4	5
sp|O00233-2|PSMD9_HUMAN	O00233-2	PSMD9_HUMAN	PSMD9	209	Homo sapiens		Isoform p27-S of 26S proteasome non-ATPase regulatory subunit 9	1	0.999	5	74	0	74	8	6	5	5	5	5	3	6	6	7	9	9	0	0	0	0	0	0	0	0	0	0	0	0	8	6	5	5	5	5	3	6	6	7	9	9
sp|O00244|ATOX1_HUMAN	O00244	ATOX1_HUMAN	ATOX1	68	Homo sapiens	1:Experimental evidence at protein level	Copper transport protein ATOX1	1	0.999	4	37	37	37	4	3	7	4	4	2	1	2	2	3	3	2	4	3	7	4	4	2	1	2	2	3	3	2	4	3	7	4	4	2	1	2	2	3	3	2
sp|O00264|PGRC1_HUMAN	O00264	PGRC1_HUMAN	PGRMC1	195	Homo sapiens	1:Experimental evidence at protein level	Membrane-associated progesterone receptor component 1	1	0.999	6	84	30	84	7	7	3	3	12	12	3	5	9	5	8	10	5	2	0	0	4	3	2	0	4	2	4	4	7	7	3	3	12	12	3	5	9	5	8	10
sp|O00267-2|SPT5H_HUMAN	O00267-2	SPT5H_HUMAN	SUPT5H	1083	Homo sapiens		Isoform 2 of Transcription elongation factor SPT5	1	0.999	3	15	0	15	0	0	2	3	0	0	2	2	1	2	2	1	0	0	0	0	0	0	0	0	0	0	0	0	0	0	2	3	0	0	2	2	1	2	2	1
sp|O00273|DFFA_HUMAN	O00273	DFFA_HUMAN	DFFA	331	Homo sapiens	1:Experimental evidence at protein level	DNA fragmentation factor subunit alpha	1	0.999	5	27	13	27	1	0	4	1	2	2	2	3	2	2	3	5	1	0	1	0	1	1	1	2	1	1	2	2	1	0	4	1	2	2	2	3	2	2	3	5
sp|O00299|CLIC1_HUMAN	O00299	CLIC1_HUMAN	CLIC1	241	Homo sapiens	1:Experimental evidence at protein level	Chloride intracellular channel protein 1	1	0.999	9	228	228	228	35	35	13	3	17	15	16	3	22	19	20	30	35	35	13	3	17	15	16	3	22	19	20	30	35	35	13	3	17	15	16	3	22	19	20	30
sp|O00303|EIF3F_HUMAN	O00303	EIF3F_HUMAN	EIF3F	357	Homo sapiens	1:Experimental evidence at protein level	Eukaryotic translation initiation factor 3 subunit F	1	0.999	4	30	30	30	4	2	3	1	3	1	2	1	1	3	5	4	4	2	3	1	3	1	2	1	1	3	5	4	4	2	3	1	3	1	2	1	1	3	5	4
sp|O00330-3|ODPX_HUMAN	O00330-3	ODPX_HUMAN	PDHX	486	Homo sapiens		Isoform 3 of Pyruvate dehydrogenase protein X component, mitochondrial	1	0.999	2	28	0	28	2	2	2	2	2	4	1	2	2	3	4	2	0	0	0	0	0	0	0	0	0	0	0	0	2	2	2	2	2	4	1	2	2	3	4	2
sp|O00391|QSOX1_HUMAN	O00391	QSOX1_HUMAN	QSOX1	747	Homo sapiens	1:Experimental evidence at protein level	Sulfhydryl oxidase 1	1	0.999	12	66	6	66	5	10	16	11	10	8	1	1	1	1	0	2	0	2	1	1	1	1	0	0	0	0	0	0	5	10	16	11	10	8	1	1	1	1	0	2
sp|O00401|WASL_HUMAN	O00401	WASL_HUMAN	WASL	505	Homo sapiens	1:Experimental evidence at protein level	Actin nucleation-promoting factor WASL	0.933	0.9987	1	1	1	1	0	0	0	0	1	0	0	0	0	0	0	0	0	0	0	0	1	0	0	0	0	0	0	0	0	0	0	0	1	0	0	0	0	0	0	0
sp|O00410-3|IPO5_HUMAN	O00410-3	IPO5_HUMAN	IPO5	1115	Homo sapiens		Isoform 3 of Importin-5	1	0.999	17	237	0	237	24	27	7	7	27	18	15	19	26	16	27	24	0	0	0	0	0	0	0	0	0	0	0	0	24	27	7	7	27	18	15	19	26	16	27	24
sp|O00418|EF2K_HUMAN	O00418	EF2K_HUMAN	EEF2K	725	Homo sapiens	1:Experimental evidence at protein level	Eukaryotic elongation factor 2 kinase	1	0.999	3	5	5	5	0	0	2	0	0	0	1	1	0	0	0	1	0	0	2	0	0	0	1	1	0	0	0	1	0	0	2	0	0	0	1	1	0	0	0	1
sp|O00422-2|SAP18_HUMAN	O00422-2	SAP18_HUMAN	SAP18	172	Homo sapiens		Isoform 2 of Histone deacetylase complex subunit SAP18	1	0.999	3	25	0	25	3	1	4	1	4	2	2	1	1	1	2	3	0	0	0	0	0	0	0	0	0	0	0	0	3	1	4	1	4	2	2	1	1	1	2	3
sp|O00425|IF2B3_HUMAN	O00425	IF2B3_HUMAN	IGF2BP3	579	Homo sapiens	1:Experimental evidence at protein level	Insulin-like growth factor 2 mRNA-binding protein 3	1	0.999	10	64	28	64	7	9	3	1	7	6	5	2	6	4	8	6	4	5	3	1	2	2	1	1	2	1	4	2	7	9	3	1	7	6	5	2	6	4	8	6
sp|O00429-3|DNM1L_HUMAN	O00429-3	DNM1L_HUMAN	DNM1L	710	Homo sapiens		Isoform 2 of Dynamin-1-like protein	1	0.999	14	132	0	132	14	17	9	7	14	9	9	12	10	11	11	9	0	0	0	0	0	0	0	0	0	0	0	0	14	17	9	7	14	9	9	12	10	11	11	9
sp|O00442|RTCA_HUMAN	O00442	RTCA_HUMAN	RTCA	366	Homo sapiens	1:Experimental evidence at protein level	RNA 3'-terminal phosphate cyclase	1	0.999	4	19	2	19	0	0	4	3	4	2	0	1	2	2	1	0	0	0	1	1	0	0	0	0	0	0	0	0	0	0	4	3	4	2	0	1	2	2	1	0
sp|O00443-2|P3C2A_HUMAN	O00443-2	P3C2A_HUMAN	PIK3C2A	483	Homo sapiens		Isoform 2 of Phosphatidylinositol 4-phosphate 3-kinase C2 domain-containing subunit alpha	1	0.999	2	3	0	3	0	0	2	1	0	0	0	0	0	0	0	0	0	0	0	0	0	0	0	0	0	0	0	0	0	0	2	1	0	0	0	0	0	0	0	0
sp|O00461|GOLI4_HUMAN	O00461	GOLI4_HUMAN	GOLIM4	696	Homo sapiens	1:Experimental evidence at protein level	Golgi integral membrane protein 4	1	0.999	7	14	14	14	0	0	8	5	0	0	0	0	1	0	0	0	0	0	8	5	0	0	0	0	1	0	0	0	0	0	8	5	0	0	0	0	1	0	0	0
sp|O00468-6|AGRIN_HUMAN	O00468-6	AGRIN_HUMAN	AGRN	2045	Homo sapiens		Isoform 6 of Agrin	1	0.999	17	176	0	176	25	22	12	10	21	19	3	7	13	16	15	13	0	0	0	0	0	0	0	0	0	0	0	0	25	22	12	10	21	19	3	7	13	16	15	13
sp|O00479|HMGN4_HUMAN	O00479	HMGN4_HUMAN	HMGN4	90	Homo sapiens	1:Experimental evidence at protein level	High mobility group nucleosome-binding domain-containing protein 4	0.9995	0.9989	3	1	1	63	0	0	0	0	0	0	0	0	0	0	1	0	0	0	0	0	0	0	0	0	0	0	1	0	5	2	5	3	5	19	1	2	2	4	7	8
sp|O00487|PSDE_HUMAN	O00487	PSDE_HUMAN	PSMD14	310	Homo sapiens	1:Experimental evidence at protein level	26S proteasome non-ATPase regulatory subunit 14	1	0.999	6	49	49	49	3	4	9	4	6	4	2	3	2	5	5	2	3	4	9	4	6	4	2	3	2	5	5	2	3	4	9	4	6	4	2	3	2	5	5	2
sp|O00499-10|BIN1_HUMAN	O00499-10	BIN1_HUMAN	BIN1	424	Homo sapiens		Isoform BIN1-13 of Myc box-dependent-interacting protein 1	1	0.999	7	65	0	65	2	5	5	8	0	2	5	4	8	10	9	7	0	0	0	0	0	0	0	0	0	0	0	0	2	5	5	8	0	2	5	4	8	10	9	7
sp|O00505|IMA4_HUMAN	O00505	IMA4_HUMAN	KPNA3	521	Homo sapiens	1:Experimental evidence at protein level	Importin subunit alpha-4	1	0.999	3	19	19	19	2	2	1	4	3	1	1	1	1	1	1	1	2	2	1	4	3	1	1	1	1	1	1	1	2	2	1	4	3	1	1	1	1	1	1	1
sp|O00507|USP9Y_HUMAN	O00507	USP9Y_HUMAN	USP9Y	2555	Homo sapiens	2:Experimental evidence at transcript level	Probable ubiquitin carboxyl-terminal hydrolase FAF-Y	0.9998	0.9944	5	5	5	28	0	1	0	0	1	0	0	0	0	1	2	0	0	1	0	0	1	0	0	0	0	1	2	0	2	4	1	2	5	3	1	1	1	3	3	2
sp|O00515|LAD1_HUMAN	O00515	LAD1_HUMAN	LAD1	517	Homo sapiens	1:Experimental evidence at protein level	Ladinin-1	1	0.999	11	160	160	160	12	11	16	17	18	11	10	14	9	15	13	14	12	11	16	17	18	11	10	14	9	15	13	14	12	11	16	17	18	11	10	14	9	15	13	14
sp|O00541-2|PESC_HUMAN	O00541-2	PESC_HUMAN	PES1	583	Homo sapiens		Isoform 2 of Pescadillo homolog	1	0.999	3	29	0	29	2	2	2	3	2	1	1	2	5	4	2	3	0	0	0	0	0	0	0	0	0	0	0	0	2	2	2	3	2	1	1	2	5	4	2	3
sp|O00560-2|SDCB1_HUMAN	O00560-2	SDCB1_HUMAN	SDCBP	297	Homo sapiens		Isoform 2 of Syntenin-1	1	0.999	2	17	0	17	3	4	0	0	2	2	0	0	2	0	2	2	0	0	0	0	0	0	0	0	0	0	0	0	3	4	0	0	2	2	0	0	2	0	2	2
sp|O00566|MPP10_HUMAN	O00566	MPP10_HUMAN	MPHOSPH10	681	Homo sapiens	1:Experimental evidence at protein level	U3 small nucleolar ribonucleoprotein protein MPP10	1	0.999	4	36	36	36	1	4	4	4	3	0	2	4	3	4	4	3	1	4	4	4	3	0	2	4	3	4	4	3	1	4	4	4	3	0	2	4	3	4	4	3
sp|O00567|NOP56_HUMAN	O00567	NOP56_HUMAN	NOP56	594	Homo sapiens	1:Experimental evidence at protein level	Nucleolar protein 56	1	0.999	10	78	78	78	5	7	2	2	7	9	8	6	8	7	8	9	5	7	2	2	7	9	8	6	8	7	8	9	5	7	2	2	7	9	8	6	8	7	8	9
sp|O00571-2|DDX3X_HUMAN	O00571-2	DDX3X_HUMAN	DDX3X	646	Homo sapiens		Isoform 2 of ATP-dependent RNA helicase DDX3X	1	0.999	13	141	0	141	12	20	12	9	14	10	12	9	13	9	13	8	0	0	0	0	0	0	0	0	0	0	0	0	12	20	12	9	14	10	12	9	13	9	13	8
sp|O00584|RNT2_HUMAN	O00584	RNT2_HUMAN	RNASET2	256	Homo sapiens	1:Experimental evidence at protein level	Ribonuclease T2	1	0.999	9	126	104	126	15	16	11	9	15	13	4	9	9	7	10	8	13	13	10	8	10	11	3	7	8	6	8	7	15	16	11	9	15	13	4	9	9	7	10	8
sp|O00592-2|PODXL_HUMAN	O00592-2	PODXL_HUMAN	PODXL	526	Homo sapiens		Isoform 2 of Podocalyxin	0.9469	0.999	1	10	0	10	2	1	0	0	0	0	2	1	1	1	1	1	0	0	0	0	0	0	0	0	0	0	0	0	2	1	0	0	0	0	2	1	1	1	1	1
sp|O00625|PIR_HUMAN	O00625	PIR_HUMAN	PIR	290	Homo sapiens	1:Experimental evidence at protein level	Pirin	1	0.999	2	12	12	12	0	0	1	2	0	0	0	2	3	1	2	1	0	0	1	2	0	0	0	2	3	1	2	1	0	0	1	2	0	0	0	2	3	1	2	1
sp|O00629|IMA3_HUMAN	O00629	IMA3_HUMAN	KPNA4	521	Homo sapiens	1:Experimental evidence at protein level	Importin subunit alpha-3	1	0.999	4	35	35	35	2	3	5	3	2	4	1	4	4	4	1	2	2	3	5	3	2	4	1	4	4	4	1	2	2	3	5	3	2	4	1	4	4	4	1	2
sp|O00712-4|NFIB_HUMAN	O00712-4	NFIB_HUMAN	NFIB	471	Homo sapiens		Isoform 4 of Nuclear factor 1 B-type	0.9469	0.999	1	1	0	1	0	0	0	0	0	0	0	0	1	0	0	0	0	0	0	0	0	0	0	0	0	0	0	0	0	0	0	0	0	0	0	0	1	0	0	0
sp|O00743-2|PPP6_HUMAN	O00743-2	PPP6_HUMAN	PPP6C	283	Homo sapiens		Isoform 2 of Serine/threonine-protein phosphatase 6 catalytic subunit	1	0.999	3	14	0	14	2	1	1	0	1	1	1	1	1	2	2	1	0	0	0	0	0	0	0	0	0	0	0	0	2	1	1	0	1	1	1	1	1	2	2	1
sp|O00748-4|EST2_HUMAN	O00748-4	EST2_HUMAN	CES2	623	Homo sapiens		Isoform 3 of Cocaine esterase	1	0.999	5	33	0	33	3	8	5	6	6	5	0	0	0	0	0	0	0	0	0	0	0	0	0	0	0	0	0	0	3	8	5	6	6	5	0	0	0	0	0	0
sp|O00750|P3C2B_HUMAN	O00750	P3C2B_HUMAN	PIK3C2B	1634	Homo sapiens	1:Experimental evidence at protein level	Phosphatidylinositol 4-phosphate 3-kinase C2 domain-containing subunit beta	1	0.9988	3	4	4	4	1	2	0	1	0	0	0	0	0	0	0	0	1	2	0	1	0	0	0	0	0	0	0	0	1	2	0	1	0	0	0	0	0	0	0	0
sp|O00754-2|MA2B1_HUMAN	O00754-2	MA2B1_HUMAN	MAN2B1	1010	Homo sapiens		Isoform 2 of Lysosomal alpha-mannosidase	1	0.999	4	9	0	9	2	1	3	1	2	0	0	0	0	0	0	0	0	0	0	0	0	0	0	0	0	0	0	0	2	1	3	1	2	0	0	0	0	0	0	0
sp|O00762|UBE2C_HUMAN	O00762	UBE2C_HUMAN	UBE2C	179	Homo sapiens	1:Experimental evidence at protein level	Ubiquitin-conjugating enzyme E2 C	0.6963	0.9923	1	1	1	1	0	0	0	0	0	0	0	0	0	0	0	1	0	0	0	0	0	0	0	0	0	0	0	1	0	0	0	0	0	0	0	0	0	0	0	1
sp|O00764-2|PDXK_HUMAN	O00764-2	PDXK_HUMAN	PDXK	284	Homo sapiens		Isoform 2 of Pyridoxal kinase	1	0.999	10	106	0	106	12	13	8	12	8	6	6	5	10	8	12	6	0	0	0	0	0	0	0	0	0	0	0	0	12	13	8	12	8	6	6	5	10	8	12	6
sp|O00767|SCD_HUMAN	O00767	SCD_HUMAN	SCD	359	Homo sapiens	1:Experimental evidence at protein level	Stearoyl-CoA desaturase	0.9469	0.999	1	3	3	3	0	0	2	1	0	0	0	0	0	0	0	0	0	0	2	1	0	0	0	0	0	0	0	0	0	0	2	1	0	0	0	0	0	0	0	0
sp|O14523|C2C2L_HUMAN	O14523	C2C2L_HUMAN	C2CD2L	706	Homo sapiens	1:Experimental evidence at protein level	Phospholipid transfer protein C2CD2L	0.9464	0.999	1	3	3	3	0	0	3	0	0	0	0	0	0	0	0	0	0	0	3	0	0	0	0	0	0	0	0	0	0	0	3	0	0	0	0	0	0	0	0	0
sp|O14531|DPYL4_HUMAN	O14531	DPYL4_HUMAN	DPYSL4	572	Homo sapiens	1:Experimental evidence at protein level	Dihydropyrimidinase-related protein 4	1	0.999	2	15	15	15	1	1	0	0	2	1	2	2	1	3	1	1	1	1	0	0	2	1	2	2	1	3	1	1	1	1	0	0	2	1	2	2	1	3	1	1
sp|O14545|TRAD1_HUMAN	O14545	TRAD1_HUMAN	TRAFD1	582	Homo sapiens	1:Experimental evidence at protein level	TRAF-type zinc finger domain-containing protein 1	1	0.999	3	12	2	12	1	1	5	3	0	1	0	0	0	0	0	1	0	0	1	1	0	0	0	0	0	0	0	0	1	1	5	3	0	1	0	0	0	0	0	1
sp|O14561|ACPM_HUMAN	O14561	ACPM_HUMAN	NDUFAB1	156	Homo sapiens	1:Experimental evidence at protein level	Acyl carrier protein, mitochondrial	1	0.999	4	91	91	91	6	5	16	7	21	10	3	3	3	5	7	5	6	5	16	7	21	10	3	3	3	5	7	5	6	5	16	7	21	10	3	3	3	5	7	5
sp|O14562|UBFD1_HUMAN	O14562	UBFD1_HUMAN	UBFD1	309	Homo sapiens	1:Experimental evidence at protein level	Ubiquitin domain-containing protein UBFD1	0.6626	0.991	1	1	1	1	0	0	1	0	0	0	0	0	0	0	0	0	0	0	1	0	0	0	0	0	0	0	0	0	0	0	1	0	0	0	0	0	0	0	0	0
sp|O14579|COPE_HUMAN	O14579	COPE_HUMAN	COPE	308	Homo sapiens	1:Experimental evidence at protein level	Coatomer subunit epsilon	1	0.999	11	104	0	104	11	12	7	6	11	7	7	6	9	9	7	12	0	0	0	0	0	0	0	0	0	0	0	0	11	12	7	6	11	7	7	6	9	9	7	12
sp|O14602|IF1AY_HUMAN	O14602	IF1AY_HUMAN	EIF1AY	144	Homo sapiens	1:Experimental evidence at protein level	Eukaryotic translation initiation factor 1A, Y-chromosomal	0.9995	0.9989	5	1	1	32	1	0	0	0	0	0	0	0	0	0	0	0	1	0	0	0	0	0	0	0	0	0	0	0	4	1	5	0	2	2	2	5	3	2	3	3
sp|O14617-5|AP3D1_HUMAN	O14617-5	AP3D1_HUMAN	AP3D1	1215	Homo sapiens		Isoform 5 of AP-3 complex subunit delta-1	1	0.999	14	98	0	98	5	7	9	9	17	11	7	5	6	7	7	8	0	0	0	0	0	0	0	0	0	0	0	0	5	7	9	9	17	11	7	5	6	7	7	8
sp|O14639-2|ABLM1_HUMAN	O14639-2	ABLM1_HUMAN	ABLIM1	718	Homo sapiens		Isoform 2 of Actin-binding LIM protein 1	1	0.999	5	27	0	27	2	3	2	0	5	2	1	2	3	2	2	3	0	0	0	0	0	0	0	0	0	0	0	0	2	3	2	0	5	2	1	2	3	2	2	3
sp|O14647-2|CHD2_HUMAN	O14647-2	CHD2_HUMAN	CHD2	1739	Homo sapiens		Isoform 2 of Chromodomain-helicase-DNA-binding protein 2	0.9999	0.999	1	2	0	2	0	0	1	1	0	0	0	0	0	0	0	0	0	0	0	0	0	0	0	0	0	0	0	0	0	0	1	1	0	0	0	0	0	0	0	0
sp|O14653-2|GOSR2_HUMAN	O14653-2	GOSR2_HUMAN	GOSR2	213	Homo sapiens		Isoform B of Golgi SNAP receptor complex member 2	0.8831	0.9976	1	1	0	1	0	0	0	0	0	0	0	0	1	0	0	0	0	0	0	0	0	0	0	0	0	0	0	0	0	0	0	0	0	0	0	0	1	0	0	0
sp|O14662-6|STX16_HUMAN	O14662-6	STX16_HUMAN	STX16	272	Homo sapiens		Isoform 6 of Syntaxin-16	1	0.999	1	19	0	19	1	2	4	5	1	0	2	2	1	1	0	0	0	0	0	0	0	0	0	0	0	0	0	0	1	2	4	5	1	0	2	2	1	1	0	0
sp|O14672|ADA10_HUMAN	O14672	ADA10_HUMAN	ADAM10	748	Homo sapiens	1:Experimental evidence at protein level	Disintegrin and metalloproteinase domain-containing protein 10	1	0.999	13	218	36	218	19	17	30	21	18	21	10	14	13	23	15	17	2	3	3	5	4	3	4	2	2	2	3	3	19	17	30	21	18	21	10	14	13	23	15	17
sp|O14683|P5I11_HUMAN	O14683	P5I11_HUMAN	TP53I11	189	Homo sapiens	1:Experimental evidence at protein level	Tumor protein p53-inducible protein 11	1	0.999	2	6	6	6	0	0	0	0	1	0	0	0	1	2	1	1	0	0	0	0	1	0	0	0	1	2	1	1	0	0	0	0	1	0	0	0	1	2	1	1
sp|O14727-4|APAF_HUMAN	O14727-4	APAF_HUMAN	APAF1	1205	Homo sapiens		Isoform 4 of Apoptotic protease-activating factor 1	1	0.999	7	15	0	15	2	2	3	0	4	2	0	0	0	1	1	0	0	0	0	0	0	0	0	0	0	0	0	0	2	2	3	0	4	2	0	0	0	1	1	0
sp|O14734|ACOT8_HUMAN	O14734	ACOT8_HUMAN	ACOT8	319	Homo sapiens	1:Experimental evidence at protein level	Acyl-coenzyme A thioesterase 8	1	0.999	2	9	9	9	0	0	2	4	2	1	0	0	0	0	0	0	0	0	2	4	2	1	0	0	0	0	0	0	0	0	2	4	2	1	0	0	0	0	0	0
sp|O14737|PDCD5_HUMAN	O14737	PDCD5_HUMAN	PDCD5	125	Homo sapiens	1:Experimental evidence at protein level	Programmed cell death protein 5	1	0.999	4	66	5	66	5	5	8	8	6	5	4	5	4	5	6	5	0	0	1	0	1	1	0	0	0	0	1	1	5	5	8	8	6	5	4	5	4	5	6	5
sp|O14744-2|ANM5_HUMAN	O14744-2	ANM5_HUMAN	PRMT5	620	Homo sapiens		Isoform 2 of Protein arginine N-methyltransferase 5	1	0.999	9	68	0	68	7	8	9	7	5	7	5	5	4	4	4	3	0	0	0	0	0	0	0	0	0	0	0	0	7	8	9	7	5	7	5	5	4	4	4	3
sp|O14745|NHRF1_HUMAN	O14745	NHRF1_HUMAN	NHERF1	358	Homo sapiens	1:Experimental evidence at protein level	Na(+)/H(+) exchange regulatory cofactor NHE-RF1	1	0.999	9	220	160	220	21	25	10	13	25	19	14	17	21	19	19	17	18	19	7	9	18	13	11	10	15	15	12	13	21	25	10	13	25	19	14	17	21	19	19	17
sp|O14763-2|TR10B_HUMAN	O14763-2	TR10B_HUMAN	TNFRSF10B	411	Homo sapiens		Isoform Short of Tumor necrosis factor receptor superfamily member 10B	0.9407	0.9989	1	1	0	1	0	0	0	0	1	0	0	0	0	0	0	0	0	0	0	0	0	0	0	0	0	0	0	0	0	0	0	0	1	0	0	0	0	0	0	0
sp|O14772|FPGT_HUMAN	O14772	FPGT_HUMAN	FPGT	607	Homo sapiens	1:Experimental evidence at protein level	Fucose-1-phosphate guanylyltransferase	0.9979	0.9989	1	2	2	2	0	0	1	1	0	0	0	0	0	0	0	0	0	0	1	1	0	0	0	0	0	0	0	0	0	0	1	1	0	0	0	0	0	0	0	0
sp|O14773-2|TPP1_HUMAN	O14773-2	TPP1_HUMAN	TPP1	320	Homo sapiens		Isoform 2 of Tripeptidyl-peptidase 1	1	0.999	6	42	0	42	6	4	6	4	4	4	3	2	1	2	3	3	0	0	0	0	0	0	0	0	0	0	0	0	6	4	6	4	4	4	3	2	1	2	3	3
sp|O14776-2|TCRG1_HUMAN	O14776-2	TCRG1_HUMAN	TCERG1	1077	Homo sapiens		Isoform 2 of Transcription elongation regulator 1	1	0.999	9	88	0	88	11	5	10	4	6	9	9	5	7	6	8	8	0	0	0	0	0	0	0	0	0	0	0	0	11	5	10	4	6	9	9	5	7	6	8	8
sp|O14786|NRP1_HUMAN	O14786	NRP1_HUMAN	NRP1	923	Homo sapiens	1:Experimental evidence at protein level	Neuropilin-1	0.9998	0.9988	2	2	1	2	1	0	0	0	0	0	0	0	0	1	0	0	0	0	0	0	0	0	0	0	0	1	0	0	1	0	0	0	0	0	0	0	0	1	0	0
sp|O14787-2|TNPO2_HUMAN	O14787-2	TNPO2_HUMAN	TNPO2	887	Homo sapiens		Isoform 2 of Transportin-2	0.9996	0.999	4	11	0	24	0	0	2	1	0	0	0	1	2	2	2	1	0	0	0	0	0	0	0	0	0	0	0	0	1	0	3	3	1	2	0	1	3	3	5	2
sp|O14818|PSA7_HUMAN	O14818	PSA7_HUMAN	PSMA7	248	Homo sapiens	1:Experimental evidence at protein level	Proteasome subunit alpha type-7	1	0.999	6	96	0	96	11	8	2	4	12	10	6	5	7	7	12	12	0	0	0	0	0	0	0	0	0	0	0	0	11	8	2	4	12	10	6	5	7	7	12	12
sp|O14828|SCAM3_HUMAN	O14828	SCAM3_HUMAN	SCAMP3	347	Homo sapiens	1:Experimental evidence at protein level	Secretory carrier-associated membrane protein 3	1	0.999	4	29	3	29	2	3	3	0	2	1	3	1	5	5	2	2	0	0	3	0	0	0	0	0	0	0	0	0	2	3	3	0	2	1	3	1	5	5	2	2
sp|O14832-2|PAHX_HUMAN	O14832-2	PAHX_HUMAN	PHYH	238	Homo sapiens		Isoform 2 of Phytanoyl-CoA dioxygenase, peroxisomal	0.9225	0.9985	1	1	0	1	0	0	0	0	0	1	0	0	0	0	0	0	0	0	0	0	0	0	0	0	0	0	0	0	0	0	0	0	0	1	0	0	0	0	0	0
sp|O14841|OPLA_HUMAN	O14841	OPLA_HUMAN	OPLAH	1288	Homo sapiens	1:Experimental evidence at protein level	5-oxoprolinase	1	0.999	6	13	13	13	2	0	2	3	3	0	0	0	0	0	1	2	2	0	2	3	3	0	0	0	0	0	1	2	2	0	2	3	3	0	0	0	0	0	1	2
sp|O14879|IFIT3_HUMAN	O14879	IFIT3_HUMAN	IFIT3	490	Homo sapiens	1:Experimental evidence at protein level	Interferon-induced protein with tetratricopeptide repeats 3	0.9467	0.999	1	2	2	2	0	0	0	0	0	0	0	0	1	0	1	0	0	0	0	0	0	0	0	0	1	0	1	0	0	0	0	0	0	0	0	0	1	0	1	0
sp|O14880|MGST3_HUMAN	O14880	MGST3_HUMAN	MGST3	152	Homo sapiens	1:Experimental evidence at protein level	Microsomal glutathione S-transferase 3	1	0.999	5	87	87	87	11	11	10	9	12	6	2	7	3	4	4	8	11	11	10	9	12	6	2	7	3	4	4	8	11	11	10	9	12	6	2	7	3	4	4	8
sp|O14896|IRF6_HUMAN	O14896	IRF6_HUMAN	IRF6	467	Homo sapiens	1:Experimental evidence at protein level	Interferon regulatory factor 6	1	0.999	2	8	6	8	0	0	2	2	1	2	0	0	1	0	0	0	0	0	1	1	1	2	0	0	1	0	0	0	0	0	2	2	1	2	0	0	1	0	0	0
sp|O14907|TX1B3_HUMAN	O14907	TX1B3_HUMAN	TAX1BP3	124	Homo sapiens	1:Experimental evidence at protein level	Tax1-binding protein 3	1	0.999	3	28	28	28	4	3	2	1	4	3	1	2	3	1	2	2	4	3	2	1	4	3	1	2	3	1	2	2	4	3	2	1	4	3	1	2	3	1	2	2
sp|O14908|GIPC1_HUMAN	O14908	GIPC1_HUMAN	GIPC1	333	Homo sapiens	1:Experimental evidence at protein level	PDZ domain-containing protein GIPC1	1	0.999	5	16	12	20	1	0	5	5	1	1	0	0	0	0	2	1	1	0	3	3	1	1	0	0	0	0	2	1	1	0	8	6	1	1	0	0	0	0	2	1
sp|O14925|TIM23_HUMAN	O14925	TIM23_HUMAN	TIMM23	209	Homo sapiens	1:Experimental evidence at protein level	Mitochondrial import inner membrane translocase subunit Tim23	1	0.999	2	4	4	4	0	0	1	0	0	0	0	1	1	1	0	0	0	0	1	0	0	0	0	1	1	1	0	0	0	0	1	0	0	0	0	1	1	1	0	0
sp|O14929-2|HAT1_HUMAN	O14929-2	HAT1_HUMAN	HAT1	334	Homo sapiens		Isoform B of Histone acetyltransferase type B catalytic subunit	0.9469	0.999	1	3	0	3	1	0	0	0	0	0	0	0	0	0	1	1	0	0	0	0	0	0	0	0	0	0	0	0	1	0	0	0	0	0	0	0	0	0	1	1
sp|O14936-2|CSKP_HUMAN	O14936-2	CSKP_HUMAN	CASK	921	Homo sapiens		Isoform 2 of Peripheral plasma membrane protein CASK	1	0.999	16	101	0	101	13	12	11	8	15	15	5	6	4	4	3	5	0	0	0	0	0	0	0	0	0	0	0	0	13	12	11	8	15	15	5	6	4	4	3	5
sp|O14949|QCR8_HUMAN	O14949	QCR8_HUMAN	UQCRQ	82	Homo sapiens	1:Experimental evidence at protein level	Cytochrome b-c1 complex subunit 8	1	0.999	4	26	26	26	4	2	3	1	2	2	1	1	2	2	3	3	4	2	3	1	2	2	1	1	2	2	3	3	4	2	3	1	2	2	1	1	2	2	3	3
sp|O14950|ML12B_HUMAN	O14950	ML12B_HUMAN	MYL12B	172	Homo sapiens	1:Experimental evidence at protein level	Myosin regulatory light chain 12B	1	0.999	8	455	0	455	41	41	29	22	43	54	30	27	43	44	41	40	0	0	0	0	0	0	0	0	0	0	0	0	41	41	29	22	43	54	30	27	43	44	41	40
sp|O14957|QCR10_HUMAN	O14957	QCR10_HUMAN	UQCR11	56	Homo sapiens	1:Experimental evidence at protein level	Cytochrome b-c1 complex subunit 10	0.9469	0.999	1	1	1	1	0	1	0	0	0	0	0	0	0	0	0	0	0	1	0	0	0	0	0	0	0	0	0	0	0	1	0	0	0	0	0	0	0	0	0	0
sp|O14964|HGS_HUMAN	O14964	HGS_HUMAN	HGS	777	Homo sapiens	1:Experimental evidence at protein level	Hepatocyte growth factor-regulated tyrosine kinase substrate	1	0.999	5	26	3	26	1	3	3	2	3	2	1	1	2	2	4	2	0	0	1	0	0	1	0	0	0	0	1	0	1	3	3	2	3	2	1	1	2	2	4	2
sp|O14974-5|MYPT1_HUMAN	O14974-5	MYPT1_HUMAN	PPP1R12A	943	Homo sapiens		Isoform 5 of Protein phosphatase 1 regulatory subunit 12A	1	0.999	17	127	0	127	5	9	14	10	7	13	7	11	12	10	14	15	0	0	0	0	0	0	0	0	0	0	0	0	5	9	14	10	7	13	7	11	12	10	14	15
sp|O14975-2|S27A2_HUMAN	O14975-2	S27A2_HUMAN	SLC27A2	567	Homo sapiens		Isoform 2 of Long-chain fatty acid transport protein 2	1	0.999	8	58	0	58	6	6	8	11	4	5	0	4	4	2	3	5	0	0	0	0	0	0	0	0	0	0	0	0	6	6	8	11	4	5	0	4	4	2	3	5
sp|O14976-2|GAK_HUMAN	O14976-2	GAK_HUMAN	GAK	1232	Homo sapiens		Isoform 2 of Cyclin-G-associated kinase	1	0.999	4	12	0	12	1	1	4	3	1	2	0	0	0	0	0	0	0	0	0	0	0	0	0	0	0	0	0	0	1	1	4	3	1	2	0	0	0	0	0	0
sp|O14979-2|HNRDL_HUMAN	O14979-2	HNRDL_HUMAN	HNRNPDL	301	Homo sapiens		Isoform 2 of Heterogeneous nuclear ribonucleoprotein D-like	1	0.999	7	96	0	98	10	7	6	5	9	7	10	7	9	6	8	12	0	0	0	0	0	0	0	0	0	0	0	0	10	7	6	5	11	7	10	7	9	6	8	12
sp|O14980|XPO1_HUMAN	O14980	XPO1_HUMAN	XPO1	1071	Homo sapiens	1:Experimental evidence at protein level	Exportin-1	1	0.999	15	104	104	104	10	8	2	0	15	11	9	9	11	11	8	10	10	8	2	0	15	11	9	9	11	11	8	10	10	8	2	0	15	11	9	9	11	11	8	10
sp|O14981-2|BTAF1_HUMAN	O14981-2	BTAF1_HUMAN	BTAF1	677	Homo sapiens		Isoform 2 of TATA-binding protein-associated factor 172	1	0.999	2	2	0	2	0	0	1	1	0	0	0	0	0	0	0	0	0	0	0	0	0	0	0	0	0	0	0	0	0	0	1	1	0	0	0	0	0	0	0	0
sp|O15020-2|SPTN2_HUMAN	O15020-2	SPTN2_HUMAN	SPTBN2	2365	Homo sapiens		Isoform 2 of Spectrin beta chain, non-erythrocytic 2	1	0.999	9	15	0	107	1	1	0	1	1	0	1	1	1	3	2	3	0	0	0	0	0	0	0	0	0	0	0	0	11	8	6	7	8	9	6	8	9	12	10	13
sp|O15027-2|SC16A_HUMAN	O15027-2	SC16A_HUMAN	SEC16A	2312	Homo sapiens		Isoform 2 of Protein transport protein Sec16A	1	0.999	5	23	0	23	2	5	3	0	3	3	0	1	1	2	1	2	0	0	0	0	0	0	0	0	0	0	0	0	2	5	3	0	3	3	0	1	1	2	1	2
sp|O15031|PLXB2_HUMAN	O15031	PLXB2_HUMAN	PLXNB2	1838	Homo sapiens	1:Experimental evidence at protein level	Plexin-B2	1	0.999	12	78	78	78	8	10	10	10	11	10	0	7	1	3	4	4	8	10	10	10	11	10	0	7	1	3	4	4	8	10	10	10	11	10	0	7	1	3	4	4
sp|O15037|KHNYN_HUMAN	O15037	KHNYN_HUMAN	KHNYN	678	Homo sapiens	1:Experimental evidence at protein level	Protein KHNYN	0.784	0.9951	1	1	1	1	0	0	0	0	0	0	0	0	0	0	1	0	0	0	0	0	0	0	0	0	0	0	1	0	0	0	0	0	0	0	0	0	0	0	1	0
sp|O15066|KIF3B_HUMAN	O15066	KIF3B_HUMAN	KIF3B	747	Homo sapiens	1:Experimental evidence at protein level	Kinesin-like protein KIF3B	1	0.999	5	11	3	11	1	0	1	2	1	3	0	1	0	1	0	1	0	0	0	0	0	2	0	1	0	0	0	0	1	0	1	2	1	3	0	1	0	1	0	1
sp|O15067|PUR4_HUMAN	O15067	PUR4_HUMAN	PFAS	1338	Homo sapiens	1:Experimental evidence at protein level	Phosphoribosylformylglycinamidine synthase	1	0.999	10	117	117	117	6	8	9	14	8	10	5	12	9	14	10	12	6	8	9	14	8	10	5	12	9	14	10	12	6	8	9	14	8	10	5	12	9	14	10	12
sp|O15084-1|ANR28_HUMAN	O15084-1	ANR28_HUMAN	ANKRD28	1086	Homo sapiens		Isoform 3 of Serine/threonine-protein phosphatase 6 regulatory ankyrin repeat subunit A	1	0.999	4	12	0	12	1	0	2	2	1	0	0	1	1	2	1	1	0	0	0	0	0	0	0	0	0	0	0	0	1	0	2	2	1	0	0	1	1	2	1	1
sp|O15091-2|MRPP3_HUMAN	O15091-2	MRPP3_HUMAN	PRORP	567	Homo sapiens		Isoform 2 of Mitochondrial ribonuclease P catalytic subunit	0.9469	0.999	1	3	0	3	0	0	1	2	0	0	0	0	0	0	0	0	0	0	0	0	0	0	0	0	0	0	0	0	0	0	1	2	0	0	0	0	0	0	0	0
sp|O15116|LSM1_HUMAN	O15116	LSM1_HUMAN	LSM1	133	Homo sapiens	1:Experimental evidence at protein level	U6 snRNA-associated Sm-like protein LSm1	1	0.999	2	36	36	36	5	4	1	1	3	3	2	5	3	3	3	3	5	4	1	1	3	3	2	5	3	3	3	3	5	4	1	1	3	3	2	5	3	3	3	3
sp|O15118|NPC1_HUMAN	O15118	NPC1_HUMAN	NPC1	1278	Homo sapiens	1:Experimental evidence at protein level	NPC intracellular cholesterol transporter 1	1	0.999	3	26	17	26	1	1	2	2	0	2	2	2	3	3	5	3	1	1	0	0	0	2	1	2	2	3	2	3	1	1	2	2	0	2	2	2	3	3	5	3
sp|O15120|PLCB_HUMAN	O15120	PLCB_HUMAN	AGPAT2	278	Homo sapiens	1:Experimental evidence at protein level	1-acyl-sn-glycerol-3-phosphate acyltransferase beta	0.8736	0.9974	1	1	1	1	0	0	0	0	0	0	0	0	0	0	0	1	0	0	0	0	0	0	0	0	0	0	0	1	0	0	0	0	0	0	0	0	0	0	0	1
sp|O15126|SCAM1_HUMAN	O15126	SCAM1_HUMAN	SCAMP1	338	Homo sapiens	1:Experimental evidence at protein level	Secretory carrier-associated membrane protein 1	1	0.999	2	24	23	24	3	1	0	0	3	2	1	3	1	2	2	6	3	1	0	0	3	2	1	3	1	2	1	6	3	1	0	0	3	2	1	3	1	2	2	6
sp|O15127|SCAM2_HUMAN	O15127	SCAM2_HUMAN	SCAMP2	329	Homo sapiens	1:Experimental evidence at protein level	Secretory carrier-associated membrane protein 2	1	0.999	2	6	6	6	2	2	0	0	0	0	0	0	0	0	1	1	2	2	0	0	0	0	0	0	0	0	1	1	2	2	0	0	0	0	0	0	0	0	1	1
sp|O15143|ARC1B_HUMAN	O15143	ARC1B_HUMAN	ARPC1B	372	Homo sapiens	1:Experimental evidence at protein level	Actin-related protein 2/3 complex subunit 1B	1	0.999	10	196	175	196	15	20	12	14	20	18	16	16	15	18	14	18	13	20	12	14	14	16	14	15	14	16	11	16	15	20	12	14	20	18	16	16	15	18	14	18
sp|O15144|ARPC2_HUMAN	O15144	ARPC2_HUMAN	ARPC2	300	Homo sapiens	1:Experimental evidence at protein level	Actin-related protein 2/3 complex subunit 2	1	0.999	10	131	131	131	14	13	12	9	11	7	11	11	8	8	14	13	14	13	12	9	11	7	11	11	8	8	14	13	14	13	12	9	11	7	11	11	8	8	14	13
sp|O15145|ARPC3_HUMAN	O15145	ARPC3_HUMAN	ARPC3	178	Homo sapiens	1:Experimental evidence at protein level	Actin-related protein 2/3 complex subunit 3	1	0.999	3	56	56	56	5	6	3	3	7	5	5	3	2	6	7	4	5	6	3	3	7	5	5	3	2	6	7	4	5	6	3	3	7	5	5	3	2	6	7	4
sp|O15160-2|RPAC1_HUMAN	O15160-2	RPAC1_HUMAN	POLR1C	342	Homo sapiens		Isoform 2 of DNA-directed RNA polymerases I and III subunit RPAC1	1	0.999	2	15	0	15	2	1	0	0	4	0	0	0	3	1	3	1	0	0	0	0	0	0	0	0	0	0	0	0	2	1	0	0	4	0	0	0	3	1	3	1
sp|O15173-2|PGRC2_HUMAN	O15173-2	PGRC2_HUMAN	PGRMC2	247	Homo sapiens		Isoform 2 of Membrane-associated progesterone receptor component 2	1	0.999	2	17	0	17	1	1	1	2	2	2	1	1	1	1	2	2	0	0	0	0	0	0	0	0	0	0	0	0	1	1	1	2	2	2	1	1	1	1	2	2
sp|O15195-2|VILL_HUMAN	O15195-2	VILL_HUMAN	VILL	842	Homo sapiens		Isoform 2 of Villin-like protein	1	0.999	18	128	0	128	17	16	15	9	17	19	5	5	7	2	10	6	0	0	0	0	0	0	0	0	0	0	0	0	17	16	15	9	17	19	5	5	7	2	10	6
sp|O15212|PFD6_HUMAN	O15212	PFD6_HUMAN	PFDN6	129	Homo sapiens	1:Experimental evidence at protein level	Prefoldin subunit 6	1	0.999	4	29	29	29	3	3	1	1	4	2	1	0	2	2	6	4	3	3	1	1	4	2	1	0	2	2	6	4	3	3	1	1	4	2	1	0	2	2	6	4
sp|O15213|WDR46_HUMAN	O15213	WDR46_HUMAN	WDR46	610	Homo sapiens	1:Experimental evidence at protein level	WD repeat-containing protein 46	0.9469	0.999	1	1	1	1	0	0	0	0	0	0	0	0	0	0	1	0	0	0	0	0	0	0	0	0	0	0	1	0	0	0	0	0	0	0	0	0	0	0	1	0
sp|O15226-2|NKRF_HUMAN	O15226-2	NKRF_HUMAN	NKRF	705	Homo sapiens		Isoform 2 of NF-kappa-B-repressing factor	1	0.999	4	7	0	7	2	0	1	3	0	0	1	0	0	0	0	0	0	0	0	0	0	0	0	0	0	0	0	0	2	0	1	3	0	0	1	0	0	0	0	0
sp|O15228|GNPAT_HUMAN	O15228	GNPAT_HUMAN	GNPAT	680	Homo sapiens	1:Experimental evidence at protein level	Dihydroxyacetone phosphate acyltransferase	1	0.999	15	82	22	82	13	11	8	8	13	9	3	0	3	5	3	6	3	2	3	3	4	1	2	0	0	1	1	2	13	11	8	8	13	9	3	0	3	5	3	6
sp|O15230|LAMA5_HUMAN	O15230	LAMA5_HUMAN	LAMA5	3695	Homo sapiens	1:Experimental evidence at protein level	Laminin subunit alpha-5	1	0.999	13	62	57	62	3	2	8	2	2	4	5	9	5	4	8	10	3	2	4	1	2	4	5	9	5	4	8	10	3	2	8	2	2	4	5	9	5	4	8	10
sp|O15231-3|ZN185_HUMAN	O15231-3	ZN185_HUMAN	ZNF185	690	Homo sapiens		Isoform 3 of Zinc finger protein 185	1	0.999	15	216	0	216	13	15	28	32	20	19	14	14	14	13	18	16	0	0	0	0	0	0	0	0	0	0	0	0	13	15	28	32	20	19	14	14	14	13	18	16
sp|O15258|RER1_HUMAN	O15258	RER1_HUMAN	RER1	196	Homo sapiens	1:Experimental evidence at protein level	Protein RER1	1	0.999	2	34	34	34	6	4	1	2	5	2	1	2	4	4	1	2	6	4	1	2	5	2	1	2	4	4	1	2	6	4	1	2	5	2	1	2	4	4	1	2
sp|O15260-2|SURF4_HUMAN	O15260-2	SURF4_HUMAN	SURF4	159	Homo sapiens		Isoform 2 of Surfeit locus protein 4	0.9981	0.999	1	16	0	16	1	1	0	0	2	3	1	1	2	1	2	2	0	0	0	0	0	0	0	0	0	0	0	0	1	1	0	0	2	3	1	1	2	1	2	2
sp|O15264|MK13_HUMAN	O15264	MK13_HUMAN	MAPK13	365	Homo sapiens	1:Experimental evidence at protein level	Mitogen-activated protein kinase 13	1	0.999	2	10	1	10	0	0	2	1	1	1	0	1	1	1	1	1	0	0	1	0	0	0	0	0	0	0	0	0	0	0	2	1	1	1	0	1	1	1	1	1
sp|O15269|SPTC1_HUMAN	O15269	SPTC1_HUMAN	SPTLC1	473	Homo sapiens	1:Experimental evidence at protein level	Serine palmitoyltransferase 1	1	0.999	5	75	55	75	5	4	8	5	8	3	5	6	7	9	7	8	4	3	7	3	5	2	3	4	5	7	5	7	5	4	8	5	8	3	5	6	7	9	7	8
sp|O15270|SPTC2_HUMAN	O15270	SPTC2_HUMAN	SPTLC2	562	Homo sapiens	1:Experimental evidence at protein level	Serine palmitoyltransferase 2	1	0.999	6	61	61	61	1	2	11	10	1	1	5	5	8	8	2	7	1	2	11	10	1	1	5	5	8	8	2	7	1	2	11	10	1	1	5	5	8	8	2	7
sp|O15294|OGT1_HUMAN	O15294	OGT1_HUMAN	OGT	1046	Homo sapiens	1:Experimental evidence at protein level	UDP-N-acetylglucosamine--peptide N-acetylglucosaminyltransferase 110 kDa subunit	1	0.999	3	20	17	20	2	2	1	1	1	1	1	2	2	2	1	4	2	1	1	1	1	1	1	2	2	1	1	3	2	2	1	1	1	1	1	2	2	2	1	4
sp|O15305|PMM2_HUMAN	O15305	PMM2_HUMAN	PMM2	246	Homo sapiens	1:Experimental evidence at protein level	Phosphomannomutase 2	1	0.999	6	40	29	40	4	5	2	1	9	5	2	1	2	2	2	5	3	4	2	1	7	5	1	1	0	1	1	3	4	5	2	1	9	5	2	1	2	2	2	5
sp|O15321-2|TM9S1_HUMAN	O15321-2	TM9S1_HUMAN	TM9SF1	489	Homo sapiens		Isoform 2 of Transmembrane 9 superfamily member 1	1	0.999	3	12	0	12	0	0	4	5	0	0	0	0	0	1	0	2	0	0	0	0	0	0	0	0	0	0	0	0	0	0	4	5	0	0	0	0	0	1	0	2
sp|O15327|INP4B_HUMAN	O15327	INP4B_HUMAN	INPP4B	924	Homo sapiens	1:Experimental evidence at protein level	Inositol polyphosphate 4-phosphatase type II	1	0.999	8	31	30	31	1	2	2	3	6	1	4	3	1	2	3	3	1	2	2	3	6	1	4	3	1	2	2	3	1	2	2	3	6	1	4	3	1	2	3	3
sp|O15347|HMGB3_HUMAN	O15347	HMGB3_HUMAN	HMGB3	200	Homo sapiens	1:Experimental evidence at protein level	High mobility group protein B3	1	0.999	8	93	93	95	2	5	7	3	7	12	9	8	5	10	12	13	2	5	7	3	7	12	9	8	5	10	12	13	2	5	7	3	7	12	10	8	6	10	12	13
sp|O15355|PPM1G_HUMAN	O15355	PPM1G_HUMAN	PPM1G	546	Homo sapiens	1:Experimental evidence at protein level	Protein phosphatase 1G	1	0.999	8	167	167	167	13	13	8	13	15	12	11	12	22	15	18	15	13	13	8	13	15	12	11	12	22	15	18	15	13	13	8	13	15	12	11	12	22	15	18	15
sp|O15357-2|SHIP2_HUMAN	O15357-2	SHIP2_HUMAN	INPPL1	1016	Homo sapiens		Isoform 2 of Phosphatidylinositol 3,4,5-trisphosphate 5-phosphatase 2	0.9462	0.999	1	1	0	1	0	0	0	0	0	0	0	0	0	1	0	0	0	0	0	0	0	0	0	0	0	0	0	0	0	0	0	0	0	0	0	0	0	1	0	0
sp|O15371-2|EIF3D_HUMAN	O15371-2	EIF3D_HUMAN	EIF3D	499	Homo sapiens		Isoform 2 of Eukaryotic translation initiation factor 3 subunit D	1	0.999	8	73	0	73	9	6	3	2	9	8	6	4	6	6	8	6	0	0	0	0	0	0	0	0	0	0	0	0	9	6	3	2	9	8	6	4	6	6	8	6
sp|O15372|EIF3H_HUMAN	O15372	EIF3H_HUMAN	EIF3H	352	Homo sapiens	1:Experimental evidence at protein level	Eukaryotic translation initiation factor 3 subunit H	1	0.999	7	75	75	75	7	7	8	8	8	7	3	6	4	6	5	6	7	7	8	8	8	7	3	6	4	6	5	6	7	7	8	8	8	7	3	6	4	6	5	6
sp|O15382|BCAT2_HUMAN	O15382	BCAT2_HUMAN	BCAT2	392	Homo sapiens	1:Experimental evidence at protein level	Branched-chain-amino-acid aminotransferase, mitochondrial	1	0.999	6	33	6	33	4	5	2	2	7	3	2	1	2	1	3	1	1	1	0	0	2	1	0	0	0	0	1	0	4	5	2	2	7	3	2	1	2	1	3	1
sp|O15393-2|TMPS2_HUMAN	O15393-2	TMPS2_HUMAN	TMPRSS2	529	Homo sapiens		Isoform 2 of Transmembrane protease serine 2	0.9985	0.9948	2	2	0	2	0	1	0	0	0	1	0	0	0	0	0	0	0	0	0	0	0	0	0	0	0	0	0	0	0	1	0	0	0	1	0	0	0	0	0	0
sp|O15400-2|STX7_HUMAN	O15400-2	STX7_HUMAN	STX7	239	Homo sapiens		Isoform 2 of Syntaxin-7	1	0.999	2	8	0	8	2	3	0	0	2	0	0	0	0	0	0	1	0	0	0	0	0	0	0	0	0	0	0	0	2	3	0	0	2	0	0	0	0	0	0	1
sp|O15438-4|MRP3_HUMAN	O15438-4	MRP3_HUMAN	ABCC3	1578	Homo sapiens		Isoform 4 of ATP-binding cassette sub-family C member 3	1	0.999	16	119	0	119	11	12	9	8	14	12	10	7	12	7	9	8	0	0	0	0	0	0	0	0	0	0	0	0	11	12	9	8	14	12	10	7	12	7	9	8
sp|O15446-2|RPA34_HUMAN	O15446-2	RPA34_HUMAN	POLR1G	512	Homo sapiens		Isoform 2 of DNA-directed RNA polymerase I subunit RPA34	0.8634	0.9972	1	2	0	2	1	0	0	0	0	0	0	0	0	0	1	0	0	0	0	0	0	0	0	0	0	0	0	0	1	0	0	0	0	0	0	0	0	0	1	0
sp|O15484|CAN5_HUMAN	O15484	CAN5_HUMAN	CAPN5	640	Homo sapiens	1:Experimental evidence at protein level	Calpain-5	1	0.999	7	76	76	76	7	7	6	2	9	8	8	4	6	7	7	5	7	7	6	2	9	8	8	4	6	7	7	5	7	7	6	2	9	8	8	4	6	7	7	5
sp|O15498|YKT6_HUMAN	O15498	YKT6_HUMAN	YKT6	198	Homo sapiens	1:Experimental evidence at protein level	Synaptobrevin homolog YKT6	0.9469	0.999	1	10	10	10	0	0	1	1	1	1	0	1	1	1	1	2	0	0	1	1	1	1	0	1	1	1	1	2	0	0	1	1	1	1	0	1	1	1	1	2
sp|O15511-2|ARPC5_HUMAN	O15511-2	ARPC5_HUMAN	ARPC5	154	Homo sapiens		Isoform 2 of Actin-related protein 2/3 complex subunit 5	1	0.999	4	32	0	32	5	3	2	1	4	5	4	1	1	0	3	3	0	0	0	0	0	0	0	0	0	0	0	0	5	3	2	1	4	5	4	1	1	0	3	3
sp|O15514|RPB4_HUMAN	O15514	RPB4_HUMAN	POLR2D	142	Homo sapiens	1:Experimental evidence at protein level	DNA-directed RNA polymerase II subunit RPB4	0.9469	0.999	1	2	2	2	0	0	0	0	1	1	0	0	0	0	0	0	0	0	0	0	1	1	0	0	0	0	0	0	0	0	0	0	1	1	0	0	0	0	0	0
sp|O43143|DHX15_HUMAN	O43143	DHX15_HUMAN	DHX15	795	Homo sapiens	1:Experimental evidence at protein level	ATP-dependent RNA helicase DHX15	1	0.999	12	146	146	146	12	11	7	8	13	7	12	15	15	15	15	16	12	11	7	8	13	7	12	15	15	15	15	16	12	11	7	8	13	7	12	15	15	15	15	16
sp|O43148-2|MCES_HUMAN	O43148-2	MCES_HUMAN	RNMT	504	Homo sapiens		Isoform 2 of mRNA cap guanine-N7 methyltransferase	1	0.9988	3	6	0	6	0	0	0	0	0	1	0	0	1	0	1	3	0	0	0	0	0	0	0	0	0	0	0	0	0	0	0	0	0	1	0	0	1	0	1	3
sp|O43149|ZZEF1_HUMAN	O43149	ZZEF1_HUMAN	ZZEF1	2961	Homo sapiens	1:Experimental evidence at protein level	Zinc finger ZZ-type and EF-hand domain-containing protein 1	1	0.999	6	13	3	13	1	1	2	2	2	0	1	1	1	1	0	1	0	0	1	0	0	0	0	0	1	0	0	1	1	1	2	2	2	0	1	1	1	1	0	1
sp|O43150-2|ASAP2_HUMAN	O43150-2	ASAP2_HUMAN	ASAP2	961	Homo sapiens		Isoform 2 of Arf-GAP with SH3 domain, ANK repeat and PH domain-containing protein 2	1	0.999	4	14	0	14	0	0	4	4	2	0	0	0	1	1	1	1	0	0	0	0	0	0	0	0	0	0	0	0	0	0	4	4	2	0	0	0	1	1	1	1
sp|O43159|RRP8_HUMAN	O43159	RRP8_HUMAN	RRP8	456	Homo sapiens	1:Experimental evidence at protein level	Ribosomal RNA-processing protein 8	1	0.999	2	17	17	17	1	1	2	2	3	2	0	1	1	1	1	2	1	1	2	2	3	2	0	1	1	1	1	2	1	1	2	2	3	2	0	1	1	1	1	2
sp|O43169|CYB5B_HUMAN	O43169	CYB5B_HUMAN	CYB5B	150	Homo sapiens	1:Experimental evidence at protein level	Cytochrome b5 type B	1	0.999	4	22	22	22	4	3	2	2	4	2	0	1	0	0	1	3	4	3	2	2	4	2	0	1	0	0	1	3	4	3	2	2	4	2	0	1	0	0	1	3
sp|O43172-2|PRP4_HUMAN	O43172-2	PRP4_HUMAN	PRPF4	521	Homo sapiens		Isoform 2 of U4/U6 small nuclear ribonucleoprotein Prp4	1	0.999	8	60	0	60	4	2	7	4	4	5	3	6	7	5	7	6	0	0	0	0	0	0	0	0	0	0	0	0	4	2	7	4	4	5	3	6	7	5	7	6
sp|O43175|SERA_HUMAN	O43175	SERA_HUMAN	PHGDH	533	Homo sapiens	1:Experimental evidence at protein level	D-3-phosphoglycerate dehydrogenase	1	0.999	15	239	239	239	25	31	12	11	20	21	18	14	27	21	22	17	25	31	12	11	20	21	18	14	27	21	22	17	25	31	12	11	20	21	18	14	27	21	22	17
sp|O43181|NDUS4_HUMAN	O43181	NDUS4_HUMAN	NDUFS4	175	Homo sapiens	1:Experimental evidence at protein level	NADH dehydrogenase [ubiquinone] iron-sulfur protein 4, mitochondrial	1	0.999	3	37	37	37	9	6	0	0	2	5	1	4	4	2	1	3	9	6	0	0	2	5	1	4	4	2	1	3	9	6	0	0	2	5	1	4	4	2	1	3
sp|O43237|DC1L2_HUMAN	O43237	DC1L2_HUMAN	DYNC1LI2	492	Homo sapiens	1:Experimental evidence at protein level	Cytoplasmic dynein 1 light intermediate chain 2	1	0.999	12	146	1	146	12	11	13	10	17	10	11	12	16	10	13	11	0	0	1	0	0	0	0	0	0	0	0	0	12	11	13	10	17	10	11	12	16	10	13	11
sp|O43240|KLK10_HUMAN	O43240	KLK10_HUMAN	KLK10	276	Homo sapiens	1:Experimental evidence at protein level	Kallikrein-10	1	0.999	2	15	15	15	0	0	0	0	0	0	1	4	3	2	3	2	0	0	0	0	0	0	1	4	3	2	3	2	0	0	0	0	0	0	1	4	3	2	3	2
sp|O43242|PSMD3_HUMAN	O43242	PSMD3_HUMAN	PSMD3	534	Homo sapiens	1:Experimental evidence at protein level	26S proteasome non-ATPase regulatory subunit 3	1	0.999	11	145	59	145	11	11	12	9	12	13	9	12	15	19	10	12	5	4	4	4	4	6	2	6	6	11	4	3	11	11	12	9	12	13	9	12	15	19	10	12
sp|O43252|PAPS1_HUMAN	O43252	PAPS1_HUMAN	PAPSS1	624	Homo sapiens	1:Experimental evidence at protein level	Bifunctional 3'-phosphoadenosine 5'-phosphosulfate synthase 1	1	0.999	5	26	26	26	0	1	4	3	1	1	1	2	3	3	3	4	0	1	4	3	1	1	1	2	3	3	3	4	0	1	4	3	1	1	1	2	3	3	3	4
sp|O43264-2|ZW10_HUMAN	O43264-2	ZW10_HUMAN	ZW10	672	Homo sapiens		Isoform 2 of Centromere/kinetochore protein zw10 homolog	1	0.999	7	30	0	30	2	2	2	1	2	3	3	3	4	2	3	3	0	0	0	0	0	0	0	0	0	0	0	0	2	2	2	1	2	3	3	3	4	2	3	3
sp|O43272-1|PROD_HUMAN	O43272-1	PROD_HUMAN	PRODH	516	Homo sapiens		Isoform 3 of Proline dehydrogenase 1, mitochondrial	1	0.999	4	12	0	12	3	3	1	1	1	2	0	1	0	0	0	0	0	0	0	0	0	0	0	0	0	0	0	0	3	3	1	1	1	2	0	1	0	0	0	0
sp|O43278-2|SPIT1_HUMAN	O43278-2	SPIT1_HUMAN	SPINT1	513	Homo sapiens		Isoform 2 of Kunitz-type protease inhibitor 1	1	0.999	8	52	0	52	6	4	8	4	5	5	3	3	2	2	4	6	0	0	0	0	0	0	0	0	0	0	0	0	6	4	8	4	5	5	3	3	2	2	4	6
sp|O43290|SNUT1_HUMAN	O43290	SNUT1_HUMAN	SART1	800	Homo sapiens	1:Experimental evidence at protein level	U4/U6.U5 tri-snRNP-associated protein 1	1	0.999	9	74	74	74	6	7	4	4	12	6	3	5	6	6	9	6	6	7	4	4	12	6	3	5	6	6	9	6	6	7	4	4	12	6	3	5	6	6	9	6
sp|O43291-2|SPIT2_HUMAN	O43291-2	SPIT2_HUMAN	SPINT2	195	Homo sapiens		Isoform 2 of Kunitz-type protease inhibitor 2	0.9999	0.999	2	20	0	20	1	1	2	3	2	1	1	2	1	2	2	2	0	0	0	0	0	0	0	0	0	0	0	0	1	1	2	3	2	1	1	2	1	2	2	2
sp|O43324|MCA3_HUMAN	O43324	MCA3_HUMAN	EEF1E1	174	Homo sapiens	1:Experimental evidence at protein level	Eukaryotic translation elongation factor 1 epsilon-1	1	0.999	4	47	16	47	1	3	7	4	4	5	1	4	4	3	4	7	0	1	5	2	2	2	0	0	0	1	2	1	1	3	7	4	4	5	1	4	4	3	4	7
sp|O43390-3|HNRPR_HUMAN	O43390-3	HNRPR_HUMAN	HNRNPR	595	Homo sapiens		Isoform 3 of Heterogeneous nuclear ribonucleoprotein R	1	0.999	14	174	0	201	12	11	16	13	15	17	14	15	17	13	14	17	0	0	0	0	0	0	0	0	0	0	0	0	14	12	17	14	16	19	18	21	19	14	16	21
sp|O43395|PRPF3_HUMAN	O43395	PRPF3_HUMAN	PRPF3	683	Homo sapiens	1:Experimental evidence at protein level	U4/U6 small nuclear ribonucleoprotein Prp3	1	0.999	6	14	6	14	1	2	1	2	0	4	0	0	0	1	2	1	1	1	0	1	0	1	0	0	0	0	2	0	1	2	1	2	0	4	0	0	0	1	2	1
sp|O43396|TXNL1_HUMAN	O43396	TXNL1_HUMAN	TXNL1	289	Homo sapiens	1:Experimental evidence at protein level	Thioredoxin-like protein 1	1	0.999	8	72	72	72	11	7	6	7	7	6	4	5	5	4	3	7	11	7	6	7	7	6	4	5	5	4	3	7	11	7	6	7	7	6	4	5	5	4	3	7
sp|O43399-2|TPD54_HUMAN	O43399-2	TPD54_HUMAN	TPD52L2	186	Homo sapiens		Isoform 2 of Tumor protein D54	0.9999	0.999	11	1	0	133	0	0	0	0	1	0	0	0	0	0	0	0	0	0	0	0	0	0	0	0	0	0	0	0	14	16	11	8	19	8	7	8	13	9	8	12
sp|O43399-5|TPD54_HUMAN	O43399-5	TPD54_HUMAN	TPD52L2	220	Homo sapiens		Isoform 5 of Tumor protein D54	1	0.999	12	163	0	163	17	19	12	11	21	10	9	12	16	11	10	15	0	0	0	0	0	0	0	0	0	0	0	0	17	19	12	11	21	10	9	12	16	11	10	15
sp|O43402|EMC8_HUMAN	O43402	EMC8_HUMAN	EMC8	210	Homo sapiens	1:Experimental evidence at protein level	ER membrane protein complex subunit 8	1	0.999	3	19	13	19	1	1	4	1	1	2	0	2	2	1	2	2	0	1	1	0	1	1	0	2	2	1	2	2	1	1	4	1	1	2	0	2	2	1	2	2
sp|O43414-2|ERI3_HUMAN	O43414-2	ERI3_HUMAN	ERI3	222	Homo sapiens		Isoform 2 of ERI1 exoribonuclease 3	1	0.999	2	16	0	16	2	2	1	2	2	1	3	0	0	1	0	2	0	0	0	0	0	0	0	0	0	0	0	0	2	2	1	2	2	1	3	0	0	1	0	2
sp|O43427-2|FIBP_HUMAN	O43427-2	FIBP_HUMAN	FIBP	357	Homo sapiens		Isoform Short of Acidic fibroblast growth factor intracellular-binding protein	0.9335	0.9987	1	5	0	5	0	0	2	1	2	0	0	0	0	0	0	0	0	0	0	0	0	0	0	0	0	0	0	0	0	0	2	1	2	0	0	0	0	0	0	0
sp|O43432-3|IF4G3_HUMAN	O43432-3	IF4G3_HUMAN	EIF4G3	1591	Homo sapiens		Isoform 3 of Eukaryotic translation initiation factor 4 gamma 3	1	0.999	7	5	0	30	0	0	1	0	3	0	1	0	0	0	0	0	0	0	0	0	0	0	0	0	0	0	0	0	2	2	3	1	5	2	3	2	2	3	3	2
sp|O43447-2|PPIH_HUMAN	O43447-2	PPIH_HUMAN	PPIH	134	Homo sapiens		Isoform 2 of Peptidyl-prolyl cis-trans isomerase H	1	0.999	1	18	0	18	2	2	1	1	2	2	1	2	2	1	1	1	0	0	0	0	0	0	0	0	0	0	0	0	2	2	1	1	2	2	1	2	2	1	1	1
sp|O43488|ARK72_HUMAN	O43488	ARK72_HUMAN	AKR7A2	359	Homo sapiens	1:Experimental evidence at protein level	Aflatoxin B1 aldehyde reductase member 2	1	0.999	8	68	55	68	6	6	5	2	12	6	3	3	5	6	8	6	5	5	3	1	9	4	3	3	4	6	7	5	6	6	5	2	12	6	3	3	5	6	8	6
sp|O43490-2|PROM1_HUMAN	O43490-2	PROM1_HUMAN	PROM1	856	Homo sapiens		Isoform 2 of Prominin-1	1	0.999	8	125	0	125	14	9	3	2	15	11	12	6	11	15	15	12	0	0	0	0	0	0	0	0	0	0	0	0	14	9	3	2	15	11	12	6	11	15	15	12
sp|O43491-4|E41L2_HUMAN	O43491-4	E41L2_HUMAN	EPB41L2	852	Homo sapiens		Isoform 4 of Band 4.1-like protein 2	1	0.999	13	63	8	63	1	2	7	5	3	7	7	6	10	5	5	5	0	1	0	0	0	0	1	2	1	1	1	1	1	2	7	5	3	7	7	6	10	5	5	5
sp|O43491|E41L2_HUMAN	O43491	E41L2_HUMAN	EPB41L2	1005	Homo sapiens	1:Experimental evidence at protein level	Band 4.1-like protein 2	0.9999	0.999	13	1	1	56	0	0	0	0	0	0	0	0	0	1	0	0	0	0	0	0	0	0	0	0	0	1	0	0	1	1	7	5	3	7	6	4	9	5	4	4
sp|O43493-3|TGON2_HUMAN	O43493-3	TGON2_HUMAN	TGOLN2	453	Homo sapiens		Isoform TGN48 of Trans-Golgi network integral membrane protein 2	1	0.999	4	17	0	17	0	1	0	0	2	2	0	2	5	0	3	2	0	0	0	0	0	0	0	0	0	0	0	0	0	1	0	0	2	2	0	2	5	0	3	2
sp|O43504|LTOR5_HUMAN	O43504	LTOR5_HUMAN	LAMTOR5	91	Homo sapiens	1:Experimental evidence at protein level	Ragulator complex protein LAMTOR5	1	0.999	3	46	46	46	6	3	4	4	6	4	2	2	4	4	3	4	6	3	4	4	6	4	2	2	4	4	3	4	6	3	4	4	6	4	2	2	4	4	3	4
sp|O43505|B4GA1_HUMAN	O43505	B4GA1_HUMAN	B4GAT1	415	Homo sapiens	1:Experimental evidence at protein level	Beta-1,4-glucuronyltransferase 1	0.9468	0.999	1	2	2	2	0	0	2	0	0	0	0	0	0	0	0	0	0	0	2	0	0	0	0	0	0	0	0	0	0	0	2	0	0	0	0	0	0	0	0	0
sp|O43520|AT8B1_HUMAN	O43520	AT8B1_HUMAN	ATP8B1	1251	Homo sapiens	1:Experimental evidence at protein level	Phospholipid-transporting ATPase IC	1	0.999	3	10	10	10	1	2	1	1	1	4	0	0	0	0	0	0	1	2	1	1	1	4	0	0	0	0	0	0	1	2	1	1	1	4	0	0	0	0	0	0
sp|O43570-2|CAH12_HUMAN	O43570-2	CAH12_HUMAN	CA12	343	Homo sapiens		Isoform 2 of Carbonic anhydrase 12	1	0.999	3	17	0	17	2	2	0	0	5	4	0	2	2	0	0	0	0	0	0	0	0	0	0	0	0	0	0	0	2	2	0	0	5	4	0	2	2	0	0	0
sp|O43583|DENR_HUMAN	O43583	DENR_HUMAN	DENR	198	Homo sapiens	1:Experimental evidence at protein level	Density-regulated protein	1	0.999	4	56	56	56	11	7	5	1	4	5	2	2	3	5	4	7	11	7	5	1	4	5	2	2	3	5	4	7	11	7	5	1	4	5	2	2	3	5	4	7
sp|O43592|XPOT_HUMAN	O43592	XPOT_HUMAN	XPOT	962	Homo sapiens	1:Experimental evidence at protein level	Exportin-T	1	0.999	6	33	33	33	2	2	5	4	8	0	1	2	2	3	2	2	2	2	5	4	8	0	1	2	2	3	2	2	2	2	5	4	8	0	1	2	2	3	2	2
sp|O43598-2|DNPH1_HUMAN	O43598-2	DNPH1_HUMAN	DNPH1	148	Homo sapiens		Isoform 2 of 2'-deoxynucleoside 5'-phosphate N-hydrolase 1	1	0.999	2	21	0	21	1	1	5	4	1	1	1	1	1	2	2	1	0	0	0	0	0	0	0	0	0	0	0	0	1	1	5	4	1	1	1	1	1	2	2	1
sp|O43615|TIM44_HUMAN	O43615	TIM44_HUMAN	TIMM44	452	Homo sapiens	1:Experimental evidence at protein level	Mitochondrial import inner membrane translocase subunit TIM44	1	0.999	5	96	96	96	12	12	8	4	11	10	4	3	9	8	6	9	12	12	8	4	11	10	4	3	9	8	6	9	12	12	8	4	11	10	4	3	9	8	6	9
sp|O43617|TPPC3_HUMAN	O43617	TPPC3_HUMAN	TRAPPC3	180	Homo sapiens	1:Experimental evidence at protein level	Trafficking protein particle complex subunit 3	0.9469	0.999	1	1	1	1	0	0	0	0	0	1	0	0	0	0	0	0	0	0	0	0	0	1	0	0	0	0	0	0	0	0	0	0	0	1	0	0	0	0	0	0
sp|O43639|NCK2_HUMAN	O43639	NCK2_HUMAN	NCK2	380	Homo sapiens	1:Experimental evidence at protein level	Cytoplasmic protein NCK2	0.9861	0.9915	2	2	2	2	0	1	0	0	0	0	0	0	0	0	0	1	0	1	0	0	0	0	0	0	0	0	0	1	0	1	0	0	0	0	0	0	0	0	0	1
sp|O43657|TSN6_HUMAN	O43657	TSN6_HUMAN	TSPAN6	245	Homo sapiens	1:Experimental evidence at protein level	Tetraspanin-6	1	0.9989	2	11	11	11	0	0	2	2	0	0	1	1	1	1	0	3	0	0	2	2	0	0	1	1	1	1	0	3	0	0	2	2	0	0	1	1	1	1	0	3
sp|O43660-2|PLRG1_HUMAN	O43660-2	PLRG1_HUMAN	PLRG1	505	Homo sapiens		Isoform 2 of Pleiotropic regulator 1	1	0.999	4	19	0	19	3	1	0	2	1	1	2	3	2	1	2	1	0	0	0	0	0	0	0	0	0	0	0	0	3	1	0	2	1	1	2	3	2	1	2	1
sp|O43670-2|ZN207_HUMAN	O43670-2	ZN207_HUMAN	ZNF207	463	Homo sapiens		Isoform 2 of BUB3-interacting and GLEBS motif-containing protein ZNF207	1	0.999	4	43	0	43	1	3	4	4	3	4	3	5	3	3	5	5	0	0	0	0	0	0	0	0	0	0	0	0	1	3	4	4	3	4	3	5	3	3	5	5
sp|O43674-2|NDUB5_HUMAN	O43674-2	NDUB5_HUMAN	NDUFB5	137	Homo sapiens		Isoform 2 of NADH dehydrogenase [ubiquinone] 1 beta subcomplex subunit 5, mitochondrial	1	0.999	2	11	0	11	1	2	0	0	4	1	0	0	0	1	0	2	0	0	0	0	0	0	0	0	0	0	0	0	1	2	0	0	4	1	0	0	0	1	0	2
sp|O43681|GET3_HUMAN	O43681	GET3_HUMAN	GET3	348	Homo sapiens	1:Experimental evidence at protein level	ATPase GET3	1	0.999	6	44	44	44	5	6	1	0	8	5	1	4	5	3	3	3	5	6	1	0	8	5	1	4	5	3	3	3	5	6	1	0	8	5	1	4	5	3	3	3
sp|O43684-2|BUB3_HUMAN	O43684-2	BUB3_HUMAN	BUB3	326	Homo sapiens		Isoform 2 of Mitotic checkpoint protein BUB3	1	0.999	3	93	0	93	5	7	6	5	6	11	7	7	8	7	13	11	0	0	0	0	0	0	0	0	0	0	0	0	5	7	6	5	6	11	7	7	8	7	13	11
sp|O43704|ST1B1_HUMAN	O43704	ST1B1_HUMAN	SULT1B1	296	Homo sapiens	1:Experimental evidence at protein level	Sulfotransferase 1B1	0.9467	0.999	1	2	2	2	0	0	1	1	0	0	0	0	0	0	0	0	0	0	1	1	0	0	0	0	0	0	0	0	0	0	1	1	0	0	0	0	0	0	0	0
sp|O43707|ACTN4_HUMAN	O43707	ACTN4_HUMAN	ACTN4	911	Homo sapiens	1:Experimental evidence at protein level	Alpha-actinin-4	1	0.999	63	3287	640	3287	254	279	302	271	296	252	314	259	264	252	283	261	39	47	63	64	52	56	63	53	53	49	44	57	254	279	302	271	296	252	314	259	264	252	283	261
sp|O43708-2|MAAI_HUMAN	O43708-2	MAAI_HUMAN	GSTZ1	161	Homo sapiens		Isoform 2 of Maleylacetoacetate isomerase	1	0.999	3	8	0	8	0	0	1	2	3	2	0	0	0	0	0	0	0	0	0	0	0	0	0	0	0	0	0	0	0	0	1	2	3	2	0	0	0	0	0	0
sp|O43715|TRIA1_HUMAN	O43715	TRIA1_HUMAN	TRIAP1	76	Homo sapiens	1:Experimental evidence at protein level	TP53-regulated inhibitor of apoptosis 1	1	0.999	3	24	24	24	3	2	1	1	2	3	1	1	1	3	2	4	3	2	1	1	2	3	1	1	1	3	2	4	3	2	1	1	2	3	1	1	1	3	2	4
sp|O43719|HTSF1_HUMAN	O43719	HTSF1_HUMAN	HTATSF1	755	Homo sapiens	1:Experimental evidence at protein level	HIV Tat-specific factor 1	1	0.999	8	41	41	41	4	4	2	2	4	1	4	1	5	2	5	7	4	4	2	2	4	1	4	1	5	2	5	7	4	4	2	2	4	1	4	1	5	2	5	7
sp|O43747-2|AP1G1_HUMAN	O43747-2	AP1G1_HUMAN	AP1G1	825	Homo sapiens		Isoform 2 of AP-1 complex subunit gamma-1	1	0.999	2	21	0	21	1	1	2	2	4	1	1	1	1	1	2	4	0	0	0	0	0	0	0	0	0	0	0	0	1	1	2	2	4	1	1	1	1	1	2	4
sp|O43765|SGTA_HUMAN	O43765	SGTA_HUMAN	SGTA	313	Homo sapiens	1:Experimental evidence at protein level	Small glutamine-rich tetratricopeptide repeat-containing protein alpha	1	0.999	5	72	72	72	10	7	2	3	9	3	7	6	4	9	6	6	10	7	2	3	9	3	7	6	4	9	6	6	10	7	2	3	9	3	7	6	4	9	6	6
sp|O43768-2|ENSA_HUMAN	O43768-2	ENSA_HUMAN	ENSA	117	Homo sapiens		Isoform 2 of Alpha-endosulfine	1	0.999	5	20	0	20	4	0	2	0	0	3	0	2	0	3	3	3	0	0	0	0	0	0	0	0	0	0	0	0	4	0	2	0	0	3	0	2	0	3	3	3
sp|O43772|MCAT_HUMAN	O43772	MCAT_HUMAN	SLC25A20	301	Homo sapiens	1:Experimental evidence at protein level	Mitochondrial carnitine/acylcarnitine carrier protein	0.9469	0.999	1	4	4	4	1	1	0	0	1	1	0	0	0	0	0	0	1	1	0	0	1	1	0	0	0	0	0	0	1	1	0	0	1	1	0	0	0	0	0	0
sp|O43776|SYNC_HUMAN	O43776	SYNC_HUMAN	NARS1	548	Homo sapiens	1:Experimental evidence at protein level	Asparagine--tRNA ligase, cytoplasmic	1	0.999	10	113	97	113	14	16	9	7	9	9	6	5	13	9	9	7	13	14	7	5	8	7	5	4	12	9	8	5	14	16	9	7	9	9	6	5	13	9	9	7
sp|O43795-2|MYO1B_HUMAN	O43795-2	MYO1B_HUMAN	MYO1B	1078	Homo sapiens		Isoform 2 of Unconventional myosin-Ib	0.9999	0.999	15	6	6	123	0	0	0	0	0	0	1	1	1	1	1	1	0	0	0	0	0	0	1	1	1	1	1	1	6	8	9	6	4	6	10	14	16	13	15	16
sp|O43795|MYO1B_HUMAN	O43795	MYO1B_HUMAN	MYO1B	1136	Homo sapiens	1:Experimental evidence at protein level	Unconventional myosin-Ib	1	0.999	15	119	7	124	6	8	6	4	4	6	10	13	16	13	15	18	0	0	0	0	0	0	1	0	1	1	1	3	6	8	9	6	4	6	10	13	16	13	15	18
sp|O43809|CPSF5_HUMAN	O43809	CPSF5_HUMAN	NUDT21	227	Homo sapiens	1:Experimental evidence at protein level	Cleavage and polyadenylation specificity factor subunit 5	1	0.999	3	41	41	41	4	4	3	3	2	5	3	4	3	4	3	3	4	4	3	3	2	5	3	4	3	4	3	3	4	4	3	3	2	5	3	4	3	4	3	3
sp|O43813|LANC1_HUMAN	O43813	LANC1_HUMAN	LANCL1	399	Homo sapiens	1:Experimental evidence at protein level	Glutathione S-transferase LANCL1	1	0.999	3	21	21	21	1	1	0	0	2	0	0	2	2	3	6	4	1	1	0	0	2	0	0	2	2	3	6	4	1	1	0	0	2	0	0	2	2	3	6	4
sp|O43815|STRN_HUMAN	O43815	STRN_HUMAN	STRN	780	Homo sapiens	1:Experimental evidence at protein level	Striatin	1	0.999	6	46	7	46	4	3	1	3	6	2	1	3	5	8	3	7	2	2	0	0	2	0	0	0	0	0	0	1	4	3	1	3	6	2	1	3	5	8	3	7
sp|O43818|U3IP2_HUMAN	O43818	U3IP2_HUMAN	RRP9	475	Homo sapiens	1:Experimental evidence at protein level	U3 small nucleolar RNA-interacting protein 2	1	0.999	5	17	17	17	0	0	1	0	0	0	1	1	2	2	4	6	0	0	1	0	0	0	1	1	2	2	4	6	0	0	1	0	0	0	1	1	2	2	4	6
sp|O43823|AKAP8_HUMAN	O43823	AKAP8_HUMAN	AKAP8	692	Homo sapiens	1:Experimental evidence at protein level	A-kinase anchor protein 8	1	0.999	3	33	33	33	3	2	0	0	4	2	5	1	4	4	5	3	3	2	0	0	4	2	5	1	4	4	5	3	3	2	0	0	4	2	5	1	4	4	5	3
sp|O43824|GTPB6_HUMAN	O43824	GTPB6_HUMAN	GTPBP6	516	Homo sapiens	1:Experimental evidence at protein level	Putative GTP-binding protein 6	0.9469	0.999	1	3	3	3	0	0	0	0	0	1	0	0	1	1	0	0	0	0	0	0	0	1	0	0	1	1	0	0	0	0	0	0	0	1	0	0	1	1	0	0
sp|O43837|IDH3B_HUMAN	O43837	IDH3B_HUMAN	IDH3B	385	Homo sapiens	1:Experimental evidence at protein level	Isocitrate dehydrogenase [NAD] subunit beta, mitochondrial	1	0.999	10	117	0	117	8	7	6	5	8	10	8	8	13	17	16	11	0	0	0	0	0	0	0	0	0	0	0	0	8	7	6	5	8	10	8	8	13	17	16	11
sp|O43847-2|NRDC_HUMAN	O43847-2	NRDC_HUMAN	NRDC	1219	Homo sapiens		Isoform 2 of Nardilysin	1	0.999	2	3	0	3	0	0	1	0	1	1	0	0	0	0	0	0	0	0	0	0	0	0	0	0	0	0	0	0	0	0	1	0	1	1	0	0	0	0	0	0
sp|O43852-2|CALU_HUMAN	O43852-2	CALU_HUMAN	CALU	315	Homo sapiens		Isoform 2 of Calumenin	0.9999	0.999	10	13	0	195	0	2	0	0	1	3	1	1	2	1	2	0	0	0	0	0	0	0	0	0	0	0	0	0	16	16	8	9	18	18	17	19	20	19	19	16
sp|O43852-3|CALU_HUMAN	O43852-3	CALU_HUMAN	CALU	323	Homo sapiens		Isoform 3 of Calumenin	1	0.999	14	238	0	238	20	20	11	12	23	19	21	24	24	22	21	21	0	0	0	0	0	0	0	0	0	0	0	0	20	20	11	12	23	19	21	24	24	22	21	21
sp|O43920|NDUS5_HUMAN	O43920	NDUS5_HUMAN	NDUFS5	106	Homo sapiens	1:Experimental evidence at protein level	NADH dehydrogenase [ubiquinone] iron-sulfur protein 5	1	0.999	3	40	40	40	2	3	1	3	5	6	4	2	5	5	2	2	2	3	1	3	5	6	4	2	5	5	2	2	2	3	1	3	5	6	4	2	5	5	2	2
sp|O43929-2|ORC4_HUMAN	O43929-2	ORC4_HUMAN	ORC4	352	Homo sapiens		Isoform 2 of Origin recognition complex subunit 4	0.9469	0.999	1	9	0	9	1	0	1	1	0	0	1	1	1	1	1	1	0	0	0	0	0	0	0	0	0	0	0	0	1	0	1	1	0	0	1	1	1	1	1	1
sp|O60216|RAD21_HUMAN	O60216	RAD21_HUMAN	RAD21	631	Homo sapiens	1:Experimental evidence at protein level	Double-strand-break repair protein rad21 homolog	1	0.9986	4	4	4	4	0	0	0	0	1	0	0	0	0	2	0	1	0	0	0	0	1	0	0	0	0	2	0	1	0	0	0	0	1	0	0	0	0	2	0	1
sp|O60218|AK1BA_HUMAN	O60218	AK1BA_HUMAN	AKR1B10	316	Homo sapiens	1:Experimental evidence at protein level	Aldo-keto reductase family 1 member B10	1	0.999	7	62	25	62	7	9	9	11	8	11	0	2	1	2	1	1	4	6	2	3	5	5	0	0	0	0	0	0	7	9	9	11	8	11	0	2	1	2	1	1
sp|O60220|TIM8A_HUMAN	O60220	TIM8A_HUMAN	TIMM8A	97	Homo sapiens	1:Experimental evidence at protein level	Mitochondrial import inner membrane translocase subunit Tim8 A	1	0.999	2	12	12	12	2	1	1	0	2	0	1	1	2	1	0	1	2	1	1	0	2	0	1	1	2	1	0	1	2	1	1	0	2	0	1	1	2	1	0	1
sp|O60231|DHX16_HUMAN	O60231	DHX16_HUMAN	DHX16	1041	Homo sapiens	1:Experimental evidence at protein level	Pre-mRNA-splicing factor ATP-dependent RNA helicase DHX16	0.9976	0.9989	1	1	1	1	0	0	0	0	0	0	0	0	0	1	0	0	0	0	0	0	0	0	0	0	0	1	0	0	0	0	0	0	0	0	0	0	0	1	0	0
sp|O60232|ZNRD2_HUMAN	O60232	ZNRD2_HUMAN	ZNRD2	199	Homo sapiens	1:Experimental evidence at protein level	Protein ZNRD2	0.9997	0.999	2	19	19	19	3	3	0	0	4	2	1	0	0	1	2	3	3	3	0	0	4	2	1	0	0	1	2	3	3	3	0	0	4	2	1	0	0	1	2	3
sp|O60238-2|BNI3L_HUMAN	O60238-2	BNI3L_HUMAN	BNIP3L	179	Homo sapiens		Isoform 2 of BCL2/adenovirus E1B 19 kDa protein-interacting protein 3-like	1	0.999	2	3	0	3	0	0	1	1	1	0	0	0	0	0	0	0	0	0	0	0	0	0	0	0	0	0	0	0	0	0	1	1	1	0	0	0	0	0	0	0
sp|O60256-2|KPRB_HUMAN	O60256-2	KPRB_HUMAN	PRPSAP2	329	Homo sapiens		Isoform 2 of Phosphoribosyl pyrophosphate synthase-associated protein 2	1	0.999	6	49	0	49	3	4	6	7	6	6	2	2	3	3	1	6	0	0	0	0	0	0	0	0	0	0	0	0	3	4	6	7	6	6	2	2	3	3	1	6
sp|O60264|SMCA5_HUMAN	O60264	SMCA5_HUMAN	SMARCA5	1052	Homo sapiens	1:Experimental evidence at protein level	SWI/SNF-related matrix-associated actin-dependent regulator of chromatin subfamily A member 5	1	0.999	13	48	48	48	4	5	6	6	3	1	4	2	3	2	7	5	4	5	6	6	3	1	4	2	3	2	7	5	4	5	6	6	3	1	4	2	3	2	7	5
sp|O60271-2|JIP4_HUMAN	O60271-2	JIP4_HUMAN	SPAG9	1311	Homo sapiens		Isoform 2 of C-Jun-amino-terminal kinase-interacting protein 4	1	0.999	16	81	0	81	5	8	8	12	8	7	5	5	5	6	3	9	0	0	0	0	0	0	0	0	0	0	0	0	5	8	8	12	8	7	5	5	5	6	3	9
sp|O60287|NPA1P_HUMAN	O60287	NPA1P_HUMAN	URB1	2271	Homo sapiens	1:Experimental evidence at protein level	Nucleolar pre-ribosomal-associated protein 1	0.9784	0.9893	1	1	1	1	0	0	0	0	1	0	0	0	0	0	0	0	0	0	0	0	1	0	0	0	0	0	0	0	0	0	0	0	1	0	0	0	0	0	0	0
sp|O60306|AQR_HUMAN	O60306	AQR_HUMAN	AQR	1485	Homo sapiens	1:Experimental evidence at protein level	RNA helicase aquarius	1	0.9989	4	5	5	5	0	0	1	1	0	0	0	0	0	2	1	0	0	0	1	1	0	0	0	0	0	2	1	0	0	0	1	1	0	0	0	0	0	2	1	0
sp|O60313-10|OPA1_HUMAN	O60313-10	OPA1_HUMAN	OPA1	1015	Homo sapiens		Isoform 4 of Dynamin-like 120 kDa protein, mitochondrial	1	0.999	18	101	0	101	8	7	10	11	13	13	9	8	5	5	7	5	0	0	0	0	0	0	0	0	0	0	0	0	8	7	10	11	13	13	9	8	5	5	7	5
sp|O60333-3|KIF1B_HUMAN	O60333-3	KIF1B_HUMAN	KIF1B	1153	Homo sapiens		Isoform 3 of Kinesin-like protein KIF1B	0.9851	0.9906	2	7	7	7	0	2	0	2	1	1	0	0	0	0	0	1	0	2	0	2	1	1	0	0	0	0	0	1	0	2	0	2	1	1	0	0	0	0	0	1
sp|O60341-2|KDM1A_HUMAN	O60341-2	KDM1A_HUMAN	KDM1A	876	Homo sapiens		Isoform 2 of Lysine-specific histone demethylase 1A	1	0.999	4	27	0	27	4	2	2	1	3	2	3	2	1	4	1	2	0	0	0	0	0	0	0	0	0	0	0	0	4	2	2	1	3	2	3	2	1	4	1	2
sp|O60361|NDK8_HUMAN	O60361	NDK8_HUMAN	NME2P1	137	Homo sapiens	5:Protein uncertain	Putative nucleoside diphosphate kinase	0.9999	0.9987	6	4	4	309	1	1	1	0	1	0	0	0	0	0	0	0	1	1	1	0	1	0	0	0	0	0	0	0	27	23	18	30	24	19	43	24	23	23	29	26
sp|O60422|ONEC3_HUMAN	O60422	ONEC3_HUMAN	ONECUT3	494	Homo sapiens	1:Experimental evidence at protein level	One cut domain family member 3	0.9233	0.9985	1	1	1	1	0	0	0	0	0	0	0	0	1	0	0	0	0	0	0	0	0	0	0	0	1	0	0	0	0	0	0	0	0	0	0	0	1	0	0	0
sp|O60437|PEPL_HUMAN	O60437	PEPL_HUMAN	PPL	1756	Homo sapiens	1:Experimental evidence at protein level	Periplakin	1	0.999	15	72	72	72	5	6	9	3	5	5	6	9	5	8	7	4	5	6	9	3	5	5	6	9	5	8	7	4	5	6	9	3	5	5	6	9	5	8	7	4
sp|O60449-2|LY75_HUMAN	O60449-2	LY75_HUMAN	LY75	1873	Homo sapiens		Isoform 2 of Lymphocyte antigen 75	1	0.999	20	289	0	289	32	26	26	24	21	30	20	20	23	20	27	20	0	0	0	0	0	0	0	0	0	0	0	0	32	26	26	24	21	30	20	20	23	20	27	20
sp|O60488-2|ACSL4_HUMAN	O60488-2	ACSL4_HUMAN	ACSL4	670	Homo sapiens		Isoform Short of Long-chain-fatty-acid--CoA ligase 4	1	0.999	11	90	0	109	6	6	8	5	5	4	9	8	11	8	8	12	0	0	0	0	0	0	0	0	0	0	0	0	8	9	8	5	6	4	12	8	14	10	11	14
sp|O60493-2|SNX3_HUMAN	O60493-2	SNX3_HUMAN	SNX3	130	Homo sapiens		Isoform 2 of Sorting nexin-3	1	0.999	2	6	0	6	0	0	0	1	0	2	0	0	1	1	1	0	0	0	0	0	0	0	0	0	0	0	0	0	0	0	0	1	0	2	0	0	1	1	1	0
sp|O60502-4|OGA_HUMAN	O60502-4	OGA_HUMAN	OGA	863	Homo sapiens		Isoform 4 of Protein O-GlcNAcase	1	0.999	3	16	0	16	0	2	2	1	0	0	1	1	2	4	2	1	0	0	0	0	0	0	0	0	0	0	0	0	0	2	2	1	0	0	1	1	2	4	2	1
sp|O60506|HNRPQ_HUMAN	O60506	HNRPQ_HUMAN	SYNCRIP	623	Homo sapiens	1:Experimental evidence at protein level	Heterogeneous nuclear ribonucleoprotein Q	1	0.999	19	251	0	251	23	22	15	6	24	17	21	24	22	19	30	28	0	0	0	0	0	0	0	0	0	0	0	0	23	22	15	6	24	17	21	24	22	19	30	28
sp|O60508|PRP17_HUMAN	O60508	PRP17_HUMAN	CDC40	579	Homo sapiens	1:Experimental evidence at protein level	Pre-mRNA-processing factor 17	1	0.999	3	14	14	14	0	0	1	2	0	0	1	2	1	2	1	4	0	0	1	2	0	0	1	2	1	2	1	4	0	0	1	2	0	0	1	2	1	2	1	4
sp|O60524-3|NEMF_HUMAN	O60524-3	NEMF_HUMAN	NEMF	1055	Homo sapiens		Isoform 3 of Ribosome quality control complex subunit NEMF	1	0.999	2	2	0	2	0	0	2	0	0	0	0	0	0	0	0	0	0	0	0	0	0	0	0	0	0	0	0	0	0	0	2	0	0	0	0	0	0	0	0	0
sp|O60547|GMDS_HUMAN	O60547	GMDS_HUMAN	GMDS	372	Homo sapiens	1:Experimental evidence at protein level	GDP-mannose 4,6 dehydratase	1	0.999	13	325	18	325	27	25	20	18	26	24	25	29	35	30	39	27	1	1	2	2	1	1	2	2	2	2	1	1	27	25	20	18	26	24	25	29	35	30	39	27
sp|O60573-2|IF4E2_HUMAN	O60573-2	IF4E2_HUMAN	EIF4E2	234	Homo sapiens		Isoform 2 of Eukaryotic translation initiation factor 4E type 2	0.9999	0.999	1	5	0	5	0	0	2	1	0	0	0	1	0	0	0	1	0	0	0	0	0	0	0	0	0	0	0	0	0	0	2	1	0	0	0	1	0	0	0	1
sp|O60610-2|DIAP1_HUMAN	O60610-2	DIAP1_HUMAN	DIAPH1	1248	Homo sapiens		Isoform 2 of Protein diaphanous homolog 1	1	0.999	13	123	0	123	8	9	14	11	20	14	4	8	11	9	7	8	0	0	0	0	0	0	0	0	0	0	0	0	8	9	14	11	20	14	4	8	11	9	7	8
sp|O60613|SEP15_HUMAN	O60613	SEP15_HUMAN	SELENOF	165	Homo sapiens	1:Experimental evidence at protein level	Selenoprotein F	1	0.999	3	14	9	14	3	4	0	0	2	0	0	0	1	1	2	1	2	3	0	0	1	0	0	0	1	0	1	1	3	4	0	0	2	0	0	0	1	1	2	1
sp|O60635|TSN1_HUMAN	O60635	TSN1_HUMAN	TSPAN1	241	Homo sapiens	1:Experimental evidence at protein level	Tetraspanin-1	0.9469	0.999	1	20	20	20	3	7	0	1	4	4	0	0	0	0	1	0	3	7	0	1	4	4	0	0	0	0	1	0	3	7	0	1	4	4	0	0	0	0	1	0
sp|O60645|EXOC3_HUMAN	O60645	EXOC3_HUMAN	EXOC3	745	Homo sapiens	1:Experimental evidence at protein level	Exocyst complex component 3	1	0.999	4	33	33	33	2	3	4	4	4	4	0	2	2	4	3	1	2	3	4	4	4	4	0	2	2	4	3	1	2	3	4	4	4	4	0	2	2	4	3	1
sp|O60664-4|PLIN3_HUMAN	O60664-4	PLIN3_HUMAN	PLIN3	422	Homo sapiens		Isoform 4 of Perilipin-3	1	0.999	7	54	0	54	7	8	3	8	6	4	2	2	2	3	3	6	0	0	0	0	0	0	0	0	0	0	0	0	7	8	3	8	6	4	2	2	2	3	3	6
sp|O60678|ANM3_HUMAN	O60678	ANM3_HUMAN	PRMT3	531	Homo sapiens	1:Experimental evidence at protein level	Protein arginine N-methyltransferase 3	0.9978	0.999	1	7	7	7	0	0	0	0	0	0	0	2	2	1	1	1	0	0	0	0	0	0	0	2	2	1	1	1	0	0	0	0	0	0	0	2	2	1	1	1
sp|O60684|IMA7_HUMAN	O60684	IMA7_HUMAN	KPNA6	536	Homo sapiens	1:Experimental evidence at protein level	Importin subunit alpha-7	1	0.999	6	36	2	36	1	2	7	3	3	2	2	3	4	3	4	2	0	1	0	0	0	0	0	0	1	0	0	0	1	2	7	3	3	2	2	3	4	3	4	2
sp|O60701|UGDH_HUMAN	O60701	UGDH_HUMAN	UGDH	494	Homo sapiens	1:Experimental evidence at protein level	UDP-glucose 6-dehydrogenase	1	0.999	15	232	0	232	21	16	14	15	27	24	16	23	19	21	17	19	0	0	0	0	0	0	0	0	0	0	0	0	21	16	14	15	27	24	16	23	19	21	17	19
sp|O60711-2|LPXN_HUMAN	O60711-2	LPXN_HUMAN	LPXN	391	Homo sapiens		Isoform 2 of Leupaxin	0.9995	0.999	2	8	0	8	0	0	0	0	0	0	1	2	1	2	1	1	0	0	0	0	0	0	0	0	0	0	0	0	0	0	0	0	0	0	1	2	1	2	1	1
sp|O60716-10|CTND1_HUMAN	O60716-10	CTND1_HUMAN	CTNND1	908	Homo sapiens		Isoform 2AB of Catenin delta-1	1	0.999	25	276	0	276	28	23	39	32	29	34	10	16	18	14	18	15	0	0	0	0	0	0	0	0	0	0	0	0	28	23	39	32	29	34	10	16	18	14	18	15
sp|O60725|ICMT_HUMAN	O60725	ICMT_HUMAN	ICMT	284	Homo sapiens	1:Experimental evidence at protein level	Protein-S-isoprenylcysteine O-methyltransferase	0.9469	0.999	1	8	8	8	0	0	0	1	0	0	0	1	0	2	3	1	0	0	0	1	0	0	0	1	0	2	3	1	0	0	0	1	0	0	0	1	0	2	3	1
sp|O60749-2|SNX2_HUMAN	O60749-2	SNX2_HUMAN	SNX2	402	Homo sapiens		Isoform 2 of Sorting nexin-2	1	0.999	3	34	0	34	2	3	3	2	4	2	1	3	4	3	3	4	0	0	0	0	0	0	0	0	0	0	0	0	2	3	3	2	4	2	1	3	4	3	3	4
sp|O60762|DPM1_HUMAN	O60762	DPM1_HUMAN	DPM1	260	Homo sapiens	1:Experimental evidence at protein level	Dolichol-phosphate mannosyltransferase subunit 1	1	0.999	2	14	14	14	0	3	2	2	0	0	0	2	2	1	1	1	0	3	2	2	0	0	0	2	2	1	1	1	0	3	2	2	0	0	0	2	2	1	1	1
sp|O60763-2|USO1_HUMAN	O60763-2	USO1_HUMAN	USO1	973	Homo sapiens		Isoform 2 of General vesicular transport factor p115	1	0.999	13	191	0	191	18	20	18	19	18	20	12	8	15	13	15	15	0	0	0	0	0	0	0	0	0	0	0	0	18	20	18	19	18	20	12	8	15	13	15	15
sp|O60783|RT14_HUMAN	O60783	RT14_HUMAN	MRPS14	128	Homo sapiens	1:Experimental evidence at protein level	28S ribosomal protein S14, mitochondrial	1	0.999	1	13	13	13	0	3	1	1	0	3	0	2	2	1	0	0	0	3	1	1	0	3	0	2	2	1	0	0	0	3	1	1	0	3	0	2	2	1	0	0
sp|O60784|TOM1_HUMAN	O60784	TOM1_HUMAN	TOM1	492	Homo sapiens	1:Experimental evidence at protein level	Target of Myb1 membrane trafficking protein	1	0.999	4	16	0	16	0	0	4	2	5	2	0	0	2	0	1	0	0	0	0	0	0	0	0	0	0	0	0	0	0	0	4	2	5	2	0	0	2	0	1	0
sp|O60814|H2B1K_HUMAN	O60814	H2B1K_HUMAN	H2BC12	126	Homo sapiens	1:Experimental evidence at protein level	Histone H2B type 1-K	1	0.999	7	1013	0	1013	82	68	39	22	102	103	70	159	73	74	103	118	0	0	0	0	0	0	0	0	0	0	0	0	82	68	39	22	102	103	70	159	73	74	103	118
sp|O60825-2|F262_HUMAN	O60825-2	F262_HUMAN	PFKFB2	471	Homo sapiens		Isoform 2 of 6-phosphofructo-2-kinase/fructose-2,6-bisphosphatase 2	1	0.999	8	15	0	15	1	2	3	1	6	1	0	0	1	0	0	0	0	0	0	0	0	0	0	0	0	0	0	0	1	2	3	1	6	1	0	0	1	0	0	0
sp|O60826|CCD22_HUMAN	O60826	CCD22_HUMAN	CCDC22	627	Homo sapiens	1:Experimental evidence at protein level	Coiled-coil domain-containing protein 22	0.9979	0.9989	1	5	5	5	0	0	1	1	3	0	0	0	0	0	0	0	0	0	1	1	3	0	0	0	0	0	0	0	0	0	1	1	3	0	0	0	0	0	0	0
sp|O60828-2|PQBP1_HUMAN	O60828-2	PQBP1_HUMAN	PQBP1	264	Homo sapiens		Isoform 2 of Polyglutamine-binding protein 1	0.9469	0.999	1	14	0	14	0	0	1	2	3	1	1	1	1	1	2	1	0	0	0	0	0	0	0	0	0	0	0	0	0	0	1	2	3	1	1	1	1	1	2	1
sp|O60830-2|TI17B_HUMAN	O60830-2	TI17B_HUMAN	TIMM17B	222	Homo sapiens		Isoform 2 of Mitochondrial import inner membrane translocase subunit Tim17-B	0.7425	0.9938	1	1	0	1	0	1	0	0	0	0	0	0	0	0	0	0	0	0	0	0	0	0	0	0	0	0	0	0	0	1	0	0	0	0	0	0	0	0	0	0
sp|O60832|DKC1_HUMAN	O60832	DKC1_HUMAN	DKC1	514	Homo sapiens	1:Experimental evidence at protein level	H/ACA ribonucleoprotein complex subunit DKC1	1	0.999	14	196	22	196	17	18	16	19	18	14	16	15	17	14	16	16	1	1	2	2	3	2	2	1	3	2	2	1	17	18	16	19	18	14	16	15	17	14	16	16
sp|O60841|IF2P_HUMAN	O60841	IF2P_HUMAN	EIF5B	1220	Homo sapiens	1:Experimental evidence at protein level	Eukaryotic translation initiation factor 5B	1	0.999	15	119	118	119	6	9	10	5	13	7	6	12	11	12	15	13	6	9	10	5	13	7	6	12	11	12	14	13	6	9	10	5	13	7	6	12	11	12	15	13
sp|O60869-2|EDF1_HUMAN	O60869-2	EDF1_HUMAN	EDF1	139	Homo sapiens		Isoform 2 of Endothelial differentiation-related factor 1	1	0.999	4	36	0	36	2	1	5	8	2	2	3	2	2	2	2	5	0	0	0	0	0	0	0	0	0	0	0	0	2	1	5	8	2	2	3	2	2	2	2	5
sp|O60879-2|DIAP2_HUMAN	O60879-2	DIAP2_HUMAN	DIAPH2	1096	Homo sapiens		Isoform 2 of Protein diaphanous homolog 2	1	0.999	3	12	0	12	1	2	3	3	1	0	0	0	1	0	1	0	0	0	0	0	0	0	0	0	0	0	0	0	1	2	3	3	1	0	0	0	1	0	1	0
sp|O60884|DNJA2_HUMAN	O60884	DNJA2_HUMAN	DNAJA2	412	Homo sapiens	1:Experimental evidence at protein level	DnaJ homolog subfamily A member 2	1	0.999	6	71	71	71	2	8	8	12	6	6	1	4	6	5	6	7	2	8	8	12	6	6	1	4	6	5	6	7	2	8	8	12	6	6	1	4	6	5	6	7
sp|O60885|BRD4_HUMAN	O60885	BRD4_HUMAN	BRD4	1362	Homo sapiens	1:Experimental evidence at protein level	Bromodomain-containing protein 4	1	0.999	6	13	7	13	0	0	1	3	1	0	3	0	1	1	2	1	0	0	1	1	1	0	2	0	1	0	1	0	0	0	1	3	1	0	3	0	1	1	2	1
sp|O60888-2|CUTA_HUMAN	O60888-2	CUTA_HUMAN	CUTA	198	Homo sapiens		Isoform A of Protein CutA	1	0.999	2	5	0	5	0	0	0	0	3	2	0	0	0	0	0	0	0	0	0	0	0	0	0	0	0	0	0	0	0	0	0	0	3	2	0	0	0	0	0	0
sp|O60925|PFD1_HUMAN	O60925	PFD1_HUMAN	PFDN1	122	Homo sapiens	1:Experimental evidence at protein level	Prefoldin subunit 1	1	0.999	2	3	3	3	0	1	0	0	1	0	0	0	0	0	1	0	0	1	0	0	1	0	0	0	0	0	1	0	0	1	0	0	1	0	0	0	0	0	1	0
sp|O60927|PP1RB_HUMAN	O60927	PP1RB_HUMAN	PPP1R11	126	Homo sapiens	1:Experimental evidence at protein level	E3 ubiquitin-protein ligase PPP1R11	1	0.999	2	3	3	3	0	0	1	1	1	0	0	0	0	0	0	0	0	0	1	1	1	0	0	0	0	0	0	0	0	0	1	1	1	0	0	0	0	0	0	0
sp|O60934|NBN_HUMAN	O60934	NBN_HUMAN	NBN	754	Homo sapiens	1:Experimental evidence at protein level	Nibrin	1	0.999	2	4	4	4	2	2	0	0	0	0	0	0	0	0	0	0	2	2	0	0	0	0	0	0	0	0	0	0	2	2	0	0	0	0	0	0	0	0	0	0
sp|O60936-1|NOL3_HUMAN	O60936-1	NOL3_HUMAN	NOL3	219	Homo sapiens		Isoform 1 of Nucleolar protein 3	0.6825	0.9918	1	1	0	1	0	0	0	1	0	0	0	0	0	0	0	0	0	0	0	0	0	0	0	0	0	0	0	0	0	0	0	1	0	0	0	0	0	0	0	0
sp|O75044|SRGP2_HUMAN	O75044	SRGP2_HUMAN	SRGAP2	1071	Homo sapiens	1:Experimental evidence at protein level	SLIT-ROBO Rho GTPase-activating protein 2	0.9994	0.999	2	3	0	3	1	1	0	0	0	0	0	0	0	0	1	0	0	0	0	0	0	0	0	0	0	0	0	0	1	1	0	0	0	0	0	0	0	0	1	0
sp|O75052-3|CAPON_HUMAN	O75052-3	CAPON_HUMAN	NOS1AP	501	Homo sapiens		Isoform 3 of Carboxyl-terminal PDZ ligand of neuronal nitric oxide synthase protein	0.8315	0.9964	1	4	0	4	0	0	0	0	0	0	0	0	1	1	1	1	0	0	0	0	0	0	0	0	0	0	0	0	0	0	0	0	0	0	0	0	1	1	1	1
sp|O75063|XYLK_HUMAN	O75063	XYLK_HUMAN	FAM20B	409	Homo sapiens	1:Experimental evidence at protein level	Glycosaminoglycan xylosylkinase	0.9996	0.999	2	4	4	4	0	0	0	0	0	1	0	0	0	1	1	1	0	0	0	0	0	1	0	0	0	1	1	1	0	0	0	0	0	1	0	0	0	1	1	1
sp|O75083|WDR1_HUMAN	O75083	WDR1_HUMAN	WDR1	606	Homo sapiens	1:Experimental evidence at protein level	WD repeat-containing protein 1	1	0.999	16	481	132	481	38	46	30	33	51	44	33	38	41	39	44	44	15	15	4	6	15	11	6	12	10	11	14	13	38	46	30	33	51	44	33	38	41	39	44	44
sp|O75116|ROCK2_HUMAN	O75116	ROCK2_HUMAN	ROCK2	1388	Homo sapiens	1:Experimental evidence at protein level	Rho-associated protein kinase 2	1	0.999	37	354	336	354	16	20	24	17	23	17	30	33	44	38	49	43	13	17	23	17	23	17	30	31	42	36	47	40	16	20	24	17	23	17	30	33	44	38	49	43
sp|O75122-3|CLAP2_HUMAN	O75122-3	CLAP2_HUMAN	CLASP2	1515	Homo sapiens		Isoform 3 of CLIP-associating protein 2	1	0.9987	3	2	0	8	0	0	1	0	1	0	0	0	0	0	0	0	0	0	0	0	0	0	0	0	0	0	0	0	0	0	1	0	1	0	1	1	1	1	1	1
sp|O75128-2|COBL_HUMAN	O75128-2	COBL_HUMAN	COBL	1343	Homo sapiens		Isoform 2 of Protein cordon-bleu	0.9978	0.999	1	2	0	2	0	0	2	0	0	0	0	0	0	0	0	0	0	0	0	0	0	0	0	0	0	0	0	0	0	0	2	0	0	0	0	0	0	0	0	0
sp|O75131|CPNE3_HUMAN	O75131	CPNE3_HUMAN	CPNE3	537	Homo sapiens	1:Experimental evidence at protein level	Copine-3	1	0.999	5	50	50	50	6	5	1	2	7	4	3	3	5	4	5	5	6	5	1	2	7	4	3	3	5	4	5	5	6	5	1	2	7	4	3	3	5	4	5	5
sp|O75146|HIP1R_HUMAN	O75146	HIP1R_HUMAN	HIP1R	1068	Homo sapiens	1:Experimental evidence at protein level	Huntingtin-interacting protein 1-related protein	1	0.999	8	26	13	26	0	0	5	6	1	6	0	3	1	3	0	1	0	0	1	2	0	3	0	2	1	3	0	1	0	0	5	6	1	6	0	3	1	3	0	1
sp|O75150-3|BRE1B_HUMAN	O75150-3	BRE1B_HUMAN	RNF40	838	Homo sapiens		Isoform 3 of E3 ubiquitin-protein ligase BRE1B	0.9809	0.9949	2	2	0	3	0	0	0	0	0	0	0	1	0	1	0	0	0	0	0	0	0	0	0	0	0	0	0	0	0	0	0	1	0	0	0	1	0	1	0	0
sp|O75153|CLU_HUMAN	O75153	CLU_HUMAN	CLUH	1309	Homo sapiens	1:Experimental evidence at protein level	Clustered mitochondria protein homolog	1	0.999	3	15	15	15	1	0	0	0	2	4	0	2	2	0	0	4	1	0	0	0	2	4	0	2	2	0	0	4	1	0	0	0	2	4	0	2	2	0	0	4
sp|O75165|DJC13_HUMAN	O75165	DJC13_HUMAN	DNAJC13	2243	Homo sapiens	1:Experimental evidence at protein level	DnaJ homolog subfamily C member 13	1	0.999	5	7	7	7	1	0	0	1	1	1	3	0	0	0	0	0	1	0	0	1	1	1	3	0	0	0	0	0	1	0	0	1	1	1	3	0	0	0	0	0
sp|O75167-4|PHAR2_HUMAN	O75167-4	PHAR2_HUMAN	PHACTR2	645	Homo sapiens		Isoform 4 of Phosphatase and actin regulator 2	1	0.9989	4	5	0	5	0	1	1	0	1	0	0	0	1	1	0	0	0	0	0	0	0	0	0	0	0	0	0	0	0	1	1	0	1	0	0	0	1	1	0	0
sp|O75175|CNOT3_HUMAN	O75175	CNOT3_HUMAN	CNOT3	753	Homo sapiens	1:Experimental evidence at protein level	CCR4-NOT transcription complex subunit 3	0.9444	0.999	1	1	1	1	0	0	0	0	1	0	0	0	0	0	0	0	0	0	0	0	1	0	0	0	0	0	0	0	0	0	0	0	1	0	0	0	0	0	0	0
sp|O75208|COQ9_HUMAN	O75208	COQ9_HUMAN	COQ9	318	Homo sapiens	1:Experimental evidence at protein level	Ubiquinone biosynthesis protein COQ9, mitochondrial	1	0.999	3	51	35	51	4	4	4	5	4	7	1	2	3	5	7	5	2	3	1	4	3	2	1	2	3	5	5	4	4	4	4	5	4	7	1	2	3	5	7	5
sp|O75223|GGCT_HUMAN	O75223	GGCT_HUMAN	GGCT	188	Homo sapiens	1:Experimental evidence at protein level	Gamma-glutamylcyclotransferase	0.9469	0.999	1	5	5	5	3	1	0	0	1	0	0	0	0	0	0	0	3	1	0	0	1	0	0	0	0	0	0	0	3	1	0	0	1	0	0	0	0	0	0	0
sp|O75306-2|NDUS2_HUMAN	O75306-2	NDUS2_HUMAN	NDUFS2	457	Homo sapiens		Isoform 2 of NADH dehydrogenase [ubiquinone] iron-sulfur protein 2, mitochondrial	1	0.999	7	100	0	100	8	14	7	7	7	6	2	6	14	11	10	8	0	0	0	0	0	0	0	0	0	0	0	0	8	14	7	7	7	6	2	6	14	11	10	8
sp|O75310|UDB11_HUMAN	O75310	UDB11_HUMAN	UGT2B11	529	Homo sapiens	1:Experimental evidence at protein level	UDP-glucuronosyltransferase 2B11	0.8553	0.997	1	2	0	2	0	0	0	2	0	0	0	0	0	0	0	0	0	0	0	0	0	0	0	0	0	0	0	0	0	0	0	2	0	0	0	0	0	0	0	0
sp|O75323|NIPS2_HUMAN	O75323	NIPS2_HUMAN	NIPSNAP2	286	Homo sapiens	1:Experimental evidence at protein level	Protein NipSnap homolog 2	1	0.999	1	31	31	31	2	1	2	2	3	1	4	1	4	5	4	2	2	1	2	2	3	1	4	1	4	5	4	2	2	1	2	2	3	1	4	1	4	5	4	2
sp|O75340-2|PDCD6_HUMAN	O75340-2	PDCD6_HUMAN	PDCD6	189	Homo sapiens		Isoform 2 of Programmed cell death protein 6	1	0.999	8	125	1	125	14	11	7	6	9	10	9	7	13	9	15	15	0	1	0	0	0	0	0	0	0	0	0	0	14	11	7	6	9	10	9	7	13	9	15	15
sp|O75347|TBCA_HUMAN	O75347	TBCA_HUMAN	TBCA	108	Homo sapiens	1:Experimental evidence at protein level	Tubulin-specific chaperone A	1	0.999	9	148	99	148	10	10	12	14	14	9	10	14	14	12	14	15	7	8	9	11	8	6	7	10	10	7	8	8	10	10	12	14	14	9	10	14	14	12	14	15
sp|O75348|VATG1_HUMAN	O75348	VATG1_HUMAN	ATP6V1G1	118	Homo sapiens	1:Experimental evidence at protein level	V-type proton ATPase subunit G 1	1	0.999	4	24	21	24	3	2	6	3	2	1	1	1	1	2	1	1	2	1	5	3	2	1	1	1	1	2	1	1	3	2	6	3	2	1	1	1	1	2	1	1
sp|O75351|VPS4B_HUMAN	O75351	VPS4B_HUMAN	VPS4B	444	Homo sapiens	1:Experimental evidence at protein level	Vacuolar protein sorting-associated protein 4B	1	0.999	3	31	31	31	3	2	6	3	2	2	2	1	1	4	2	3	3	2	6	3	2	2	2	1	1	4	2	3	3	2	6	3	2	2	2	1	1	4	2	3
sp|O75352-2|MPU1_HUMAN	O75352-2	MPU1_HUMAN	MPDU1	186	Homo sapiens		Isoform 2 of Mannose-P-dolichol utilization defect 1 protein	1	0.999	2	15	0	15	1	5	3	2	1	2	0	0	1	0	0	0	0	0	0	0	0	0	0	0	0	0	0	0	1	5	3	2	1	2	0	0	1	0	0	0
sp|O75363|BCAS1_HUMAN	O75363	BCAS1_HUMAN	BCAS1	584	Homo sapiens	1:Experimental evidence at protein level	Breast carcinoma-amplified sequence 1	1	0.999	8	31	3	31	5	3	10	4	6	3	0	0	0	0	0	0	0	1	1	1	0	0	0	0	0	0	0	0	5	3	10	4	6	3	0	0	0	0	0	0
sp|O75367-1|H2AY_HUMAN	O75367-1	H2AY_HUMAN	MACROH2A1	372	Homo sapiens		Isoform 2 of Core histone macro-H2A.1	1	0.999	8	163	0	163	20	24	15	9	18	15	7	11	6	10	15	13	0	0	0	0	0	0	0	0	0	0	0	0	20	24	15	9	18	15	7	11	6	10	15	13
sp|O75368|SH3L1_HUMAN	O75368	SH3L1_HUMAN	SH3BGRL	114	Homo sapiens	1:Experimental evidence at protein level	Adapter SH3BGRL	1	0.999	3	15	15	15	2	1	1	1	1	1	1	1	1	2	2	1	2	1	1	1	1	1	1	1	1	2	2	1	2	1	1	1	1	1	1	1	1	2	2	1
sp|O75369-2|FLNB_HUMAN	O75369-2	FLNB_HUMAN	FLNB	2578	Homo sapiens		Isoform 2 of Filamin-B	0.9896	0.999	91	11	0	1882	3	4	0	0	1	0	0	0	0	0	1	2	0	0	0	0	0	0	0	0	0	0	0	0	226	232	121	139	192	161	119	114	149	128	143	158
sp|O75369-8|FLNB_HUMAN	O75369-8	FLNB_HUMAN	FLNB	2633	Homo sapiens		Isoform 8 of Filamin-B	1	0.999	91	1872	1	1872	223	228	121	139	192	161	119	114	149	128	142	156	0	0	0	0	1	0	0	0	0	0	0	0	223	228	121	139	192	161	119	114	149	128	142	156
sp|O75380|NDUS6_HUMAN	O75380	NDUS6_HUMAN	NDUFS6	124	Homo sapiens	1:Experimental evidence at protein level	NADH dehydrogenase [ubiquinone] iron-sulfur protein 6, mitochondrial	1	0.999	4	66	66	66	6	8	4	3	7	7	3	5	5	7	7	4	6	8	4	3	7	7	3	5	5	7	7	4	6	8	4	3	7	7	3	5	5	7	7	4
sp|O75381-2|PEX14_HUMAN	O75381-2	PEX14_HUMAN	PEX14	334	Homo sapiens		Isoform 2 of Peroxisomal membrane protein PEX14	1	0.999	2	15	0	15	1	1	2	1	1	1	1	2	1	2	1	1	0	0	0	0	0	0	0	0	0	0	0	0	1	1	2	1	1	1	1	2	1	2	1	1
sp|O75390|CISY_HUMAN	O75390	CISY_HUMAN	CS	466	Homo sapiens	1:Experimental evidence at protein level	Citrate synthase, mitochondrial	1	0.999	10	84	84	84	11	9	6	7	10	6	1	8	9	6	5	6	11	9	6	7	10	6	1	8	9	6	5	6	11	9	6	7	10	6	1	8	9	6	5	6
sp|O75391|SPAG7_HUMAN	O75391	SPAG7_HUMAN	SPAG7	227	Homo sapiens	1:Experimental evidence at protein level	Sperm-associated antigen 7	0.8728	0.9974	1	1	1	1	0	0	0	0	0	0	0	0	1	0	0	0	0	0	0	0	0	0	0	0	1	0	0	0	0	0	0	0	0	0	0	0	1	0	0	0
sp|O75396|SC22B_HUMAN	O75396	SC22B_HUMAN	SEC22B	215	Homo sapiens	1:Experimental evidence at protein level	Vesicle-trafficking protein SEC22b	1	0.999	5	47	47	47	6	9	5	4	4	4	0	2	4	5	2	2	6	9	5	4	4	4	0	2	4	5	2	2	6	9	5	4	4	4	0	2	4	5	2	2
sp|O75400-2|PR40A_HUMAN	O75400-2	PR40A_HUMAN	PRPF40A	930	Homo sapiens		Isoform 2 of Pre-mRNA-processing factor 40 homolog A	1	0.999	6	72	0	72	2	5	10	7	5	8	3	7	6	5	9	5	0	0	0	0	0	0	0	0	0	0	0	0	2	5	10	7	5	8	3	7	6	5	9	5
sp|O75414|NDK6_HUMAN	O75414	NDK6_HUMAN	NME6	186	Homo sapiens	1:Experimental evidence at protein level	Nucleoside diphosphate kinase 6	0.7305	0.9935	1	2	2	2	0	0	1	0	0	0	0	0	0	0	1	0	0	0	1	0	0	0	0	0	0	0	1	0	0	0	1	0	0	0	0	0	0	0	1	0
sp|O75427|LRCH4_HUMAN	O75427	LRCH4_HUMAN	LRCH4	683	Homo sapiens	1:Experimental evidence at protein level	Leucine-rich repeat and calponin homology domain-containing protein 4	1	0.9981	2	4	4	4	0	1	2	1	0	0	0	0	0	0	0	0	0	1	2	1	0	0	0	0	0	0	0	0	0	1	2	1	0	0	0	0	0	0	0	0
sp|O75431-2|MTX2_HUMAN	O75431-2	MTX2_HUMAN	MTX2	253	Homo sapiens		Isoform 2 of Metaxin-2	1	0.999	2	23	0	23	3	4	2	2	1	3	1	1	1	2	1	2	0	0	0	0	0	0	0	0	0	0	0	0	3	4	2	2	1	3	1	1	1	2	1	2
sp|O75436|VP26A_HUMAN	O75436	VP26A_HUMAN	VPS26A	327	Homo sapiens	1:Experimental evidence at protein level	Vacuolar protein sorting-associated protein 26A	1	0.999	7	58	15	58	6	3	6	4	6	5	5	5	6	4	5	3	1	0	6	2	1	2	0	1	1	0	1	0	6	3	6	4	6	5	5	5	6	4	5	3
sp|O75439|MPPB_HUMAN	O75439	MPPB_HUMAN	PMPCB	489	Homo sapiens	1:Experimental evidence at protein level	Mitochondrial-processing peptidase subunit beta	1	0.999	4	30	30	30	1	4	5	3	3	4	2	1	3	1	2	1	1	4	5	3	3	4	2	1	3	1	2	1	1	4	5	3	3	4	2	1	3	1	2	1
sp|O75475|PSIP1_HUMAN	O75475	PSIP1_HUMAN	PSIP1	530	Homo sapiens	1:Experimental evidence at protein level	PC4 and SFRS1-interacting protein	1	0.999	6	25	2	25	0	0	0	2	0	0	4	5	2	3	5	4	0	0	0	0	0	0	0	0	0	0	2	0	0	0	0	2	0	0	4	5	2	3	5	4
sp|O75477|ERLN1_HUMAN	O75477	ERLN1_HUMAN	ERLIN1	348	Homo sapiens	1:Experimental evidence at protein level	Erlin-1	1	0.999	2	8	8	8	0	0	0	0	1	2	0	0	0	1	3	1	0	0	0	0	1	2	0	0	0	1	3	1	0	0	0	0	1	2	0	0	0	1	3	1
sp|O75487|GPC4_HUMAN	O75487	GPC4_HUMAN	GPC4	556	Homo sapiens	1:Experimental evidence at protein level	Glypican-4	1	0.999	5	36	13	36	0	0	1	0	0	0	5	4	7	8	7	4	0	0	0	0	0	0	1	2	3	3	3	1	0	0	1	0	0	0	5	4	7	8	7	4
sp|O75489|NDUS3_HUMAN	O75489	NDUS3_HUMAN	NDUFS3	264	Homo sapiens	1:Experimental evidence at protein level	NADH dehydrogenase [ubiquinone] iron-sulfur protein 3, mitochondrial	1	0.999	9	66	54	66	7	5	5	3	7	6	4	4	6	7	7	5	6	4	4	3	6	5	3	2	5	6	6	4	7	5	5	3	7	6	4	4	6	7	7	5
sp|O75494-2|SRS10_HUMAN	O75494-2	SRS10_HUMAN	SRSF10	261	Homo sapiens		Isoform 2 of Serine/arginine-rich splicing factor 10	1	0.999	4	33	0	33	1	3	3	2	4	2	2	3	2	2	4	5	0	0	0	0	0	0	0	0	0	0	0	0	1	3	3	2	4	2	2	3	2	2	4	5
sp|O75521-2|ECI2_HUMAN	O75521-2	ECI2_HUMAN	ECI2	359	Homo sapiens		Isoform 2 of Enoyl-CoA delta isomerase 2	1	0.999	4	31	0	31	2	2	4	1	2	1	2	2	2	3	5	5	0	0	0	0	0	0	0	0	0	0	0	0	2	2	4	1	2	1	2	2	2	3	5	5
sp|O75531|BAF_HUMAN	O75531	BAF_HUMAN	BANF1	89	Homo sapiens	1:Experimental evidence at protein level	Barrier-to-autointegration factor	1	0.999	2	37	37	37	5	6	1	0	3	1	2	3	3	4	6	3	5	6	1	0	3	1	2	3	3	4	6	3	5	6	1	0	3	1	2	3	3	4	6	3
sp|O75533|SF3B1_HUMAN	O75533	SF3B1_HUMAN	SF3B1	1304	Homo sapiens	1:Experimental evidence at protein level	Splicing factor 3B subunit 1	1	0.999	29	313	295	313	18	18	14	19	29	30	25	31	27	34	33	35	17	17	14	19	28	28	22	29	26	31	31	33	18	18	14	19	29	30	25	31	27	34	33	35
sp|O75534-2|CSDE1_HUMAN	O75534-2	CSDE1_HUMAN	CSDE1	767	Homo sapiens		Isoform 2 of Cold shock domain-containing protein E1	1	0.999	8	90	0	90	12	6	4	7	4	8	7	9	8	7	9	9	0	0	0	0	0	0	0	0	0	0	0	0	12	6	4	7	4	8	7	9	8	7	9	9
sp|O75569|PRKRA_HUMAN	O75569	PRKRA_HUMAN	PRKRA	313	Homo sapiens	1:Experimental evidence at protein level	Interferon-inducible double-stranded RNA-dependent protein kinase activator A	1	0.999	3	20	2	20	0	0	3	2	0	2	3	0	3	2	2	3	0	0	0	2	0	0	0	0	0	0	0	0	0	0	3	2	0	2	3	0	3	2	2	3
sp|O75582-2|KS6A5_HUMAN	O75582-2	KS6A5_HUMAN	RPS6KA5	549	Homo sapiens		Isoform 2 of Ribosomal protein S6 kinase alpha-5	0.9469	0.999	1	2	0	2	0	0	1	1	0	0	0	0	0	0	0	0	0	0	0	0	0	0	0	0	0	0	0	0	0	0	1	1	0	0	0	0	0	0	0	0
sp|O75600-2|KBL_HUMAN	O75600-2	KBL_HUMAN	GCAT	445	Homo sapiens		Isoform 2 of 2-amino-3-ketobutyrate coenzyme A ligase, mitochondrial	0.914	0.9983	1	1	0	1	0	0	0	0	0	1	0	0	0	0	0	0	0	0	0	0	0	0	0	0	0	0	0	0	0	0	0	0	0	1	0	0	0	0	0	0
sp|O75607|NPM3_HUMAN	O75607	NPM3_HUMAN	NPM3	178	Homo sapiens	1:Experimental evidence at protein level	Nucleoplasmin-3	0.9469	0.999	1	10	10	10	1	1	0	0	1	1	1	1	1	1	1	1	1	1	0	0	1	1	1	1	1	1	1	1	1	1	0	0	1	1	1	1	1	1	1	1
sp|O75608-2|LYPA1_HUMAN	O75608-2	LYPA1_HUMAN	LYPLA1	214	Homo sapiens		Isoform 2 of Acyl-protein thioesterase 1	1	0.999	3	43	0	43	2	5	4	2	7	2	1	3	5	3	5	4	0	0	0	0	0	0	0	0	0	0	0	0	2	5	4	2	7	2	1	3	5	3	5	4
sp|O75643|U520_HUMAN	O75643	U520_HUMAN	SNRNP200	2136	Homo sapiens	1:Experimental evidence at protein level	U5 small nuclear ribonucleoprotein 200 kDa helicase	1	0.999	25	244	133	244	11	13	22	18	25	16	14	24	20	24	27	30	5	6	14	11	14	8	8	11	12	14	14	16	11	13	22	18	25	16	14	24	20	24	27	30
sp|O75663|TIPRL_HUMAN	O75663	TIPRL_HUMAN	TIPRL	272	Homo sapiens	1:Experimental evidence at protein level	TIP41-like protein	1	0.999	4	23	1	23	2	2	1	0	3	1	3	1	3	2	3	2	0	0	0	0	0	0	0	0	1	0	0	0	2	2	1	0	3	1	3	1	3	2	3	2
sp|O75674|TM1L1_HUMAN	O75674	TM1L1_HUMAN	TOM1L1	476	Homo sapiens	1:Experimental evidence at protein level	TOM1-like protein 1	1	0.999	4	11	0	11	3	0	0	0	4	4	0	0	0	0	0	0	0	0	0	0	0	0	0	0	0	0	0	0	3	0	0	0	4	4	0	0	0	0	0	0
sp|O75676-2|KS6A4_HUMAN	O75676-2	KS6A4_HUMAN	RPS6KA4	766	Homo sapiens		Isoform 2 of Ribosomal protein S6 kinase alpha-4	0.9189	0.9984	1	1	0	1	0	0	0	0	1	0	0	0	0	0	0	0	0	0	0	0	0	0	0	0	0	0	0	0	0	0	0	0	1	0	0	0	0	0	0	0
sp|O75683|SURF6_HUMAN	O75683	SURF6_HUMAN	SURF6	361	Homo sapiens	1:Experimental evidence at protein level	Surfeit locus protein 6	1	0.999	2	6	6	6	0	0	2	3	0	0	0	1	0	0	0	0	0	0	2	3	0	0	0	1	0	0	0	0	0	0	2	3	0	0	0	1	0	0	0	0
sp|O75688-2|PPM1B_HUMAN	O75688-2	PPM1B_HUMAN	PPM1B	387	Homo sapiens		Isoform Beta-2 of Protein phosphatase 1B	1	0.999	2	4	0	4	1	0	0	0	1	2	0	0	0	0	0	0	0	0	0	0	0	0	0	0	0	0	0	0	1	0	0	0	1	2	0	0	0	0	0	0
sp|O75689|ADAP1_HUMAN	O75689	ADAP1_HUMAN	ADAP1	374	Homo sapiens	1:Experimental evidence at protein level	Arf-GAP with dual PH domain-containing protein 1	1	0.999	2	5	4	5	0	0	2	1	0	0	0	2	0	0	0	0	0	0	2	1	0	0	0	1	0	0	0	0	0	0	2	1	0	0	0	2	0	0	0	0
sp|O75691|UTP20_HUMAN	O75691	UTP20_HUMAN	UTP20	2785	Homo sapiens	1:Experimental evidence at protein level	Small subunit processome component 20 homolog	1	0.999	4	5	5	5	0	0	3	0	0	0	0	0	0	0	2	0	0	0	3	0	0	0	0	0	0	0	2	0	0	0	3	0	0	0	0	0	0	0	2	0
sp|O75694|NU155_HUMAN	O75694	NU155_HUMAN	NUP155	1391	Homo sapiens	1:Experimental evidence at protein level	Nuclear pore complex protein Nup155	1	0.999	7	29	1	29	1	0	2	4	1	1	2	6	3	2	3	4	0	0	0	0	0	0	1	0	0	0	0	0	1	0	2	4	1	1	2	6	3	2	3	4
sp|O75695|XRP2_HUMAN	O75695	XRP2_HUMAN	RP2	350	Homo sapiens	1:Experimental evidence at protein level	Protein XRP2	0.9999	0.999	2	12	12	12	0	1	1	3	4	3	0	0	0	0	0	0	0	1	1	3	4	3	0	0	0	0	0	0	0	1	1	3	4	3	0	0	0	0	0	0
sp|O75717-2|WDHD1_HUMAN	O75717-2	WDHD1_HUMAN	WDHD1	1006	Homo sapiens		Isoform 2 of WD repeat and HMG-box DNA-binding protein 1	0.8841	0.9977	1	1	0	1	0	0	0	0	0	0	0	1	0	0	0	0	0	0	0	0	0	0	0	0	0	0	0	0	0	0	0	0	0	0	0	1	0	0	0	0
sp|O75746-2|S2512_HUMAN	O75746-2	S2512_HUMAN	SLC25A12	571	Homo sapiens		Isoform 2 of Electrogenic aspartate/glutamate antiporter SLC25A12, mitochondrial	1	0.999	4	31	0	31	1	1	2	4	5	2	3	5	3	2	2	1	0	0	0	0	0	0	0	0	0	0	0	0	1	1	2	4	5	2	3	5	3	2	2	1
sp|O75787-2|RENR_HUMAN	O75787-2	RENR_HUMAN	ATP6AP2	318	Homo sapiens		Isoform 2 of Renin receptor	0.9469	0.999	1	12	0	12	0	1	1	1	1	2	0	2	1	0	1	2	0	0	0	0	0	0	0	0	0	0	0	0	0	1	1	1	1	2	0	2	1	0	1	2
sp|O75808|CAN15_HUMAN	O75808	CAN15_HUMAN	CAPN15	1086	Homo sapiens	1:Experimental evidence at protein level	Calpain-15	0.9997	0.9985	2	4	3	4	0	0	2	2	0	0	0	0	0	0	0	0	0	0	2	1	0	0	0	0	0	0	0	0	0	0	2	2	0	0	0	0	0	0	0	0
sp|O75821|EIF3G_HUMAN	O75821	EIF3G_HUMAN	EIF3G	320	Homo sapiens	1:Experimental evidence at protein level	Eukaryotic translation initiation factor 3 subunit G	1	0.999	5	54	54	54	2	5	3	3	4	5	2	4	7	5	8	6	2	5	3	3	4	5	2	4	7	5	8	6	2	5	3	3	4	5	2	4	7	5	8	6
sp|O75822-2|EIF3J_HUMAN	O75822-2	EIF3J_HUMAN	EIF3J	204	Homo sapiens		Isoform 2 of Eukaryotic translation initiation factor 3 subunit J	1	0.999	2	19	0	19	2	3	0	0	4	1	3	1	2	1	1	1	0	0	0	0	0	0	0	0	0	0	0	0	2	3	0	0	4	1	3	1	2	1	1	1
sp|O75832|PSD10_HUMAN	O75832	PSD10_HUMAN	PSMD10	226	Homo sapiens	1:Experimental evidence at protein level	26S proteasome non-ATPase regulatory subunit 10	1	0.999	6	108	3	108	12	12	2	7	10	11	4	8	8	10	11	13	1	1	0	0	0	0	0	1	0	0	0	0	12	12	2	7	10	11	4	8	8	10	11	13
sp|O75843|AP1G2_HUMAN	O75843	AP1G2_HUMAN	AP1G2	785	Homo sapiens	1:Experimental evidence at protein level	AP-1 complex subunit gamma-like 2	1	0.999	3	13	13	13	1	1	1	2	3	4	0	0	1	0	0	0	1	1	1	2	3	4	0	0	1	0	0	0	1	1	1	2	3	4	0	0	1	0	0	0
sp|O75844|FACE1_HUMAN	O75844	FACE1_HUMAN	ZMPSTE24	475	Homo sapiens	1:Experimental evidence at protein level	CAAX prenyl protease 1 homolog	1	0.999	4	25	25	25	1	1	3	5	3	5	0	0	1	2	2	2	1	1	3	5	3	5	0	0	1	2	2	2	1	1	3	5	3	5	0	0	1	2	2	2
sp|O75874|IDHC_HUMAN	O75874	IDHC_HUMAN	IDH1	414	Homo sapiens	1:Experimental evidence at protein level	Isocitrate dehydrogenase [NADP] cytoplasmic	1	0.999	18	401	401	401	28	34	24	25	33	40	39	31	39	31	34	43	28	34	24	25	33	40	39	31	39	31	34	43	28	34	24	25	33	40	39	31	39	31	34	43
sp|O75880|SCO1_HUMAN	O75880	SCO1_HUMAN	SCO1	301	Homo sapiens	1:Experimental evidence at protein level	Protein SCO1 homolog, mitochondrial	1	0.999	3	25	25	25	1	1	5	6	1	1	1	4	1	1	1	2	1	1	5	6	1	1	1	4	1	1	1	2	1	1	5	6	1	1	1	4	1	1	1	2
sp|O75882-2|ATRN_HUMAN	O75882-2	ATRN_HUMAN	ATRN	1272	Homo sapiens		Isoform 2 of Attractin	0.9469	0.999	1	1	0	1	0	0	0	0	0	0	0	0	1	0	0	0	0	0	0	0	0	0	0	0	0	0	0	0	0	0	0	0	0	0	0	0	1	0	0	0
sp|O75884|RBBP9_HUMAN	O75884	RBBP9_HUMAN	RBBP9	186	Homo sapiens	1:Experimental evidence at protein level	Serine hydrolase RBBP9	1	0.999	5	37	15	37	1	0	1	1	2	0	5	4	5	6	7	5	0	0	1	0	0	0	3	2	2	2	2	3	1	0	1	1	2	0	5	4	5	6	7	5
sp|O75886|STAM2_HUMAN	O75886	STAM2_HUMAN	STAM2	525	Homo sapiens	1:Experimental evidence at protein level	Signal transducing adapter molecule 2	1	0.9946	3	4	0	12	2	1	0	0	0	0	0	0	0	1	0	0	0	0	0	0	0	0	0	0	0	0	0	0	4	2	0	0	1	0	0	0	0	1	2	2
sp|O75907|DGAT1_HUMAN	O75907	DGAT1_HUMAN	DGAT1	488	Homo sapiens	1:Experimental evidence at protein level	Diacylglycerol O-acyltransferase 1	1	0.999	4	5	5	5	0	0	0	3	0	0	0	0	2	0	0	0	0	0	0	3	0	0	0	0	2	0	0	0	0	0	0	3	0	0	0	0	2	0	0	0
sp|O75909-1|CCNK_HUMAN	O75909-1	CCNK_HUMAN	CCNK	357	Homo sapiens		Isoform 3 of Cyclin-K	0.9468	0.999	1	7	0	7	0	0	3	2	1	1	0	0	0	0	0	0	0	0	0	0	0	0	0	0	0	0	0	0	0	0	3	2	1	1	0	0	0	0	0	0
sp|O75911|DHRS3_HUMAN	O75911	DHRS3_HUMAN	DHRS3	302	Homo sapiens	1:Experimental evidence at protein level	Short-chain dehydrogenase/reductase 3	0.9469	0.999	1	1	1	1	0	0	0	0	0	1	0	0	0	0	0	0	0	0	0	0	0	1	0	0	0	0	0	0	0	0	0	0	0	1	0	0	0	0	0	0
sp|O75934|SPF27_HUMAN	O75934	SPF27_HUMAN	BCAS2	225	Homo sapiens	1:Experimental evidence at protein level	Pre-mRNA-splicing factor SPF27	1	0.999	4	23	23	23	3	1	2	2	1	1	4	1	2	1	2	3	3	1	2	2	1	1	4	1	2	1	2	3	3	1	2	2	1	1	4	1	2	1	2	3
sp|O75937|DNJC8_HUMAN	O75937	DNJC8_HUMAN	DNAJC8	253	Homo sapiens	1:Experimental evidence at protein level	DnaJ homolog subfamily C member 8	1	0.999	6	34	34	34	1	0	0	1	3	2	2	5	4	3	8	5	1	0	0	1	3	2	2	5	4	3	8	5	1	0	0	1	3	2	2	5	4	3	8	5
sp|O75940|SPF30_HUMAN	O75940	SPF30_HUMAN	SMNDC1	238	Homo sapiens	1:Experimental evidence at protein level	Survival of motor neuron-related-splicing factor 30	1	0.999	4	38	38	38	0	0	6	2	1	1	2	4	4	4	5	9	0	0	6	2	1	1	2	4	4	4	5	9	0	0	6	2	1	1	2	4	4	4	5	9
sp|O75947|ATP5H_HUMAN	O75947	ATP5H_HUMAN	ATP5PD	161	Homo sapiens	1:Experimental evidence at protein level	ATP synthase subunit d, mitochondrial	1	0.999	6	146	64	146	17	19	9	5	14	19	10	9	8	8	15	13	6	6	8	4	4	8	4	5	2	4	7	6	17	19	9	5	14	19	10	9	8	8	15	13
sp|O75955|FLOT1_HUMAN	O75955	FLOT1_HUMAN	FLOT1	427	Homo sapiens	1:Experimental evidence at protein level	Flotillin-1	1	0.999	3	33	10	33	2	2	2	4	3	2	2	3	2	4	5	2	0	1	1	1	0	0	2	1	1	1	1	1	2	2	2	4	3	2	2	3	2	4	5	2
sp|O75962-2|TRIO_HUMAN	O75962-2	TRIO_HUMAN	TRIO	2921	Homo sapiens		Isoform 2 of Triple functional domain protein	1	0.999	2	4	0	4	1	0	1	0	0	0	0	0	0	2	0	0	0	0	0	0	0	0	0	0	0	0	0	0	1	0	1	0	0	0	0	0	0	2	0	0
sp|O75964|ATP5L_HUMAN	O75964	ATP5L_HUMAN	ATP5MG	103	Homo sapiens	1:Experimental evidence at protein level	ATP synthase subunit g, mitochondrial	1	0.999	2	14	14	14	1	1	1	0	2	1	2	0	2	1	1	2	1	1	1	0	2	1	2	0	2	1	1	2	1	1	1	0	2	1	2	0	2	1	1	2
sp|O75976|CBPD_HUMAN	O75976	CBPD_HUMAN	CPD	1380	Homo sapiens	1:Experimental evidence at protein level	Carboxypeptidase D	1	0.999	5	14	3	14	1	1	2	1	2	1	3	0	2	1	0	0	0	1	0	0	1	0	1	0	0	0	0	0	1	1	2	1	2	1	3	0	2	1	0	0
sp|O76003|GLRX3_HUMAN	O76003	GLRX3_HUMAN	GLRX3	335	Homo sapiens	1:Experimental evidence at protein level	Glutaredoxin-3	1	0.999	5	27	27	27	4	3	1	1	4	2	1	0	3	2	2	4	4	3	1	1	4	2	1	0	3	2	2	4	4	3	1	1	4	2	1	0	3	2	2	4
sp|O76013|KRT36_HUMAN	O76013	KRT36_HUMAN	KRT36	467	Homo sapiens	1:Experimental evidence at protein level	Keratin, type I cuticular Ha6	0.7659	0.9946	1	6	6	6	0	0	2	3	0	1	0	0	0	0	0	0	0	0	2	3	0	1	0	0	0	0	0	0	0	0	2	3	0	1	0	0	0	0	0	0
sp|O76014|KRT37_HUMAN	O76014	KRT37_HUMAN	KRT37	449	Homo sapiens	1:Experimental evidence at protein level	Keratin, type I cuticular Ha7	0.8899	0.9978	1	17	17	17	1	1	2	5	1	3	0	1	2	1	0	0	1	1	2	5	1	3	0	1	2	1	0	0	1	1	2	5	1	3	0	1	2	1	0	0
sp|O76021|RL1D1_HUMAN	O76021	RL1D1_HUMAN	RSL1D1	490	Homo sapiens	1:Experimental evidence at protein level	Ribosomal L1 domain-containing protein 1	1	0.999	6	32	19	32	1	2	6	8	3	8	0	0	0	0	3	1	0	0	2	4	3	7	0	0	0	0	2	1	1	2	6	8	3	8	0	0	0	0	3	1
sp|O76024|WFS1_HUMAN	O76024	WFS1_HUMAN	WFS1	890	Homo sapiens	1:Experimental evidence at protein level	Wolframin	1	0.999	8	52	52	52	7	3	4	5	6	7	1	3	2	4	6	4	7	3	4	5	6	7	1	3	2	4	6	4	7	3	4	5	6	7	1	3	2	4	6	4
sp|O76031|CLPX_HUMAN	O76031	CLPX_HUMAN	CLPX	633	Homo sapiens	1:Experimental evidence at protein level	ATP-dependent Clp protease ATP-binding subunit clpX-like, mitochondrial	1	0.999	6	12	12	12	0	0	4	1	0	1	0	0	0	1	1	4	0	0	4	1	0	1	0	0	0	1	1	4	0	0	4	1	0	1	0	0	0	1	1	4
sp|O76041-2|NEBL_HUMAN	O76041-2	NEBL_HUMAN	NEBL	270	Homo sapiens		Isoform 2 of Nebulette	1	0.999	6	41	3	41	1	2	0	0	1	4	2	5	9	4	5	8	0	0	0	0	1	0	0	1	0	0	0	1	1	2	0	0	1	4	2	5	9	4	5	8
sp|O76054|S14L2_HUMAN	O76054	S14L2_HUMAN	SEC14L2	403	Homo sapiens	1:Experimental evidence at protein level	SEC14-like protein 2	1	0.999	3	6	0	6	0	0	1	2	3	0	0	0	0	0	0	0	0	0	0	0	0	0	0	0	0	0	0	0	0	0	1	2	3	0	0	0	0	0	0	0
sp|O76071|CIAO1_HUMAN	O76071	CIAO1_HUMAN	CIAO1	339	Homo sapiens	1:Experimental evidence at protein level	Probable cytosolic iron-sulfur protein assembly protein CIAO1	1	0.999	2	3	3	3	0	0	0	0	1	1	0	0	0	0	0	1	0	0	0	0	1	1	0	0	0	0	0	1	0	0	0	0	1	1	0	0	0	0	0	1
sp|O76094-2|SRP72_HUMAN	O76094-2	SRP72_HUMAN	SRP72	610	Homo sapiens		Isoform 2 of Signal recognition particle subunit SRP72	1	0.999	7	53	0	53	4	7	4	2	6	3	6	3	5	3	4	6	0	0	0	0	0	0	0	0	0	0	0	0	4	7	4	2	6	3	6	3	5	3	4	6
sp|O94760|DDAH1_HUMAN	O94760	DDAH1_HUMAN	DDAH1	285	Homo sapiens	1:Experimental evidence at protein level	N(G),N(G)-dimethylarginine dimethylaminohydrolase 1	1	0.999	14	240	37	240	24	27	9	11	31	19	17	13	22	21	23	23	2	3	3	1	5	3	2	2	2	5	2	7	24	27	9	11	31	19	17	13	22	21	23	23
sp|O94763-2|RMP_HUMAN	O94763-2	RMP_HUMAN	URI1	459	Homo sapiens		Isoform 2 of Unconventional prefoldin RPB5 interactor 1	1	0.9981	2	3	0	3	0	1	0	1	0	0	0	1	0	0	0	0	0	0	0	0	0	0	0	0	0	0	0	0	0	1	0	1	0	0	0	1	0	0	0	0
sp|O94776|MTA2_HUMAN	O94776	MTA2_HUMAN	MTA2	668	Homo sapiens	1:Experimental evidence at protein level	Metastasis-associated protein MTA2	1	0.999	4	46	33	46	6	8	2	2	2	5	5	0	6	3	5	2	4	6	1	2	1	4	5	0	4	2	3	1	6	8	2	2	2	5	5	0	6	3	5	2
sp|O94804|STK10_HUMAN	O94804	STK10_HUMAN	STK10	968	Homo sapiens	1:Experimental evidence at protein level	Serine/threonine-protein kinase 10	1	0.999	4	4	4	20	0	0	1	0	1	0	0	0	0	1	0	1	0	0	1	0	1	0	0	0	0	1	0	1	2	1	2	1	2	2	1	2	1	2	1	3
sp|O94819|KBTBB_HUMAN	O94819	KBTBB_HUMAN	KBTBD11	623	Homo sapiens	1:Experimental evidence at protein level	Kelch repeat and BTB domain-containing protein 11	0.7733	0.9948	1	3	3	3	0	0	2	1	0	0	0	0	0	0	0	0	0	0	2	1	0	0	0	0	0	0	0	0	0	0	2	1	0	0	0	0	0	0	0	0
sp|O94822-3|LTN1_HUMAN	O94822-3	LTN1_HUMAN	LTN1	1812	Homo sapiens		Isoform 3 of E3 ubiquitin-protein ligase listerin	0.9998	0.9967	2	2	1	2	0	0	0	1	0	1	0	0	0	0	0	0	0	0	0	1	0	0	0	0	0	0	0	0	0	0	0	1	0	1	0	0	0	0	0	0
sp|O94826|TOM70_HUMAN	O94826	TOM70_HUMAN	TOMM70	608	Homo sapiens	1:Experimental evidence at protein level	Mitochondrial import receptor subunit TOM70	1	0.999	12	130	130	130	12	10	9	10	10	11	11	8	14	11	13	11	12	10	9	10	10	11	11	8	14	11	13	11	12	10	9	10	10	11	11	8	14	11	13	11
sp|O94832|MYO1D_HUMAN	O94832	MYO1D_HUMAN	MYO1D	1006	Homo sapiens	1:Experimental evidence at protein level	Unconventional myosin-Id	1	0.999	21	144	139	144	16	18	19	16	24	20	1	5	6	6	8	5	16	18	16	14	24	20	1	5	6	6	8	5	16	18	19	16	24	20	1	5	6	6	8	5
sp|O94855-2|SC24D_HUMAN	O94855-2	SC24D_HUMAN	SEC24D	1033	Homo sapiens		Isoform 2 of Protein transport protein Sec24D	1	0.999	3	8	0	8	1	0	2	1	2	2	0	0	0	0	0	0	0	0	0	0	0	0	0	0	0	0	0	0	1	0	2	1	2	2	0	0	0	0	0	0
sp|O94874-3|UFL1_HUMAN	O94874-3	UFL1_HUMAN	UFL1	509	Homo sapiens		Isoform 3 of E3 UFM1-protein ligase 1	1	0.999	4	48	0	48	4	4	1	3	5	3	3	6	6	3	5	5	0	0	0	0	0	0	0	0	0	0	0	0	4	4	1	3	5	3	3	6	6	3	5	5
sp|O94880-1|PHF14_HUMAN	O94880-1	PHF14_HUMAN	PHF14	888	Homo sapiens		Isoform 2 of PHD finger protein 14	1	0.9989	2	4	0	4	0	0	2	2	0	0	0	0	0	0	0	0	0	0	0	0	0	0	0	0	0	0	0	0	0	0	2	2	0	0	0	0	0	0	0	0
sp|O94887|FARP2_HUMAN	O94887	FARP2_HUMAN	FARP2	1054	Homo sapiens	1:Experimental evidence at protein level	FERM, ARHGEF and pleckstrin domain-containing protein 2	0.9994	0.999	1	10	0	10	0	0	0	0	4	3	1	1	0	0	1	0	0	0	0	0	0	0	0	0	0	0	0	0	0	0	0	0	4	3	1	1	0	0	1	0
sp|O94888|UBXN7_HUMAN	O94888	UBXN7_HUMAN	UBXN7	489	Homo sapiens	1:Experimental evidence at protein level	UBX domain-containing protein 7	1	0.999	2	11	11	11	1	2	1	0	1	1	1	0	1	1	1	1	1	2	1	0	1	1	1	0	1	1	1	1	1	2	1	0	1	1	1	0	1	1	1	1
sp|O94901-9|SUN1_HUMAN	O94901-9	SUN1_HUMAN	SUN1	916	Homo sapiens		Isoform 8 of SUN domain-containing protein 1	1	0.999	4	10	1	10	0	2	3	3	0	1	0	1	0	0	0	0	0	0	1	0	0	0	0	0	0	0	0	0	0	2	3	3	0	1	0	1	0	0	0	0
sp|O94903|PLPHP_HUMAN	O94903	PLPHP_HUMAN	PLPBP	275	Homo sapiens	1:Experimental evidence at protein level	Pyridoxal phosphate homeostasis protein	1	0.999	5	126	126	126	9	9	8	11	13	10	11	8	11	12	12	12	9	9	8	11	13	10	11	8	11	12	12	12	9	9	8	11	13	10	11	8	11	12	12	12
sp|O94905|ERLN2_HUMAN	O94905	ERLN2_HUMAN	ERLIN2	339	Homo sapiens	1:Experimental evidence at protein level	Erlin-2	1	0.999	4	9	9	9	2	1	0	1	1	1	1	1	1	0	0	0	2	1	0	1	1	1	1	1	1	0	0	0	2	1	0	1	1	1	1	1	1	0	0	0
sp|O94906|PRP6_HUMAN	O94906	PRP6_HUMAN	PRPF6	941	Homo sapiens	1:Experimental evidence at protein level	Pre-mRNA-processing factor 6	1	0.999	12	67	5	67	3	6	4	6	11	8	2	3	8	3	5	8	1	2	0	0	2	0	0	0	0	0	0	0	3	6	4	6	11	8	2	3	8	3	5	8
sp|O94919|ENDD1_HUMAN	O94919	ENDD1_HUMAN	ENDOD1	500	Homo sapiens	1:Experimental evidence at protein level	Endonuclease domain-containing 1 protein	0.9469	0.999	1	1	1	1	0	0	0	0	0	0	0	0	1	0	0	0	0	0	0	0	0	0	0	0	1	0	0	0	0	0	0	0	0	0	0	0	1	0	0	0
sp|O94925-3|GLSK_HUMAN	O94925-3	GLSK_HUMAN	GLS	598	Homo sapiens		Isoform 3 of Glutaminase kidney isoform, mitochondrial	1	0.999	7	59	16	59	1	1	5	5	6	7	5	6	3	4	9	7	0	1	0	0	1	1	2	2	1	1	4	3	1	1	5	5	6	7	5	6	3	4	9	7
sp|O94973-2|AP2A2_HUMAN	O94973-2	AP2A2_HUMAN	AP2A2	940	Homo sapiens		Isoform 2 of AP-2 complex subunit alpha-2	1	0.999	12	109	0	109	10	8	9	9	17	13	5	8	8	7	9	6	0	0	0	0	0	0	0	0	0	0	0	0	10	8	9	9	17	13	5	8	8	7	9	6
sp|O94979-10|SC31A_HUMAN	O94979-10	SC31A_HUMAN	SEC31A	1166	Homo sapiens		Isoform 10 of Protein transport protein Sec31A	1	0.999	11	94	0	94	8	12	8	8	10	9	5	6	6	6	8	8	0	0	0	0	0	0	0	0	0	0	0	0	8	12	8	8	10	9	5	6	6	6	8	8
sp|O94992|HEXI1_HUMAN	O94992	HEXI1_HUMAN	HEXIM1	359	Homo sapiens	1:Experimental evidence at protein level	Protein HEXIM1	1	0.999	3	37	37	37	2	3	3	1	3	2	6	1	4	2	5	5	2	3	3	1	3	2	6	1	4	2	5	5	2	3	3	1	3	2	6	1	4	2	5	5
sp|O95049|ZO3_HUMAN	O95049	ZO3_HUMAN	TJP3	919	Homo sapiens	1:Experimental evidence at protein level	Tight junction protein ZO-3	1	0.999	7	69	13	69	7	7	4	4	8	8	3	6	5	7	7	3	1	1	0	0	1	1	1	2	1	3	1	1	7	7	4	4	8	8	3	6	5	7	7	3
sp|O95071-2|UBR5_HUMAN	O95071-2	UBR5_HUMAN	UBR5	2798	Homo sapiens		Isoform 2 of E3 ubiquitin-protein ligase UBR5	1	0.999	7	26	0	26	0	0	5	3	0	3	0	3	2	3	3	4	0	0	0	0	0	0	0	0	0	0	0	0	0	0	5	3	0	3	0	3	2	3	3	4
sp|O95081-2|AGFG2_HUMAN	O95081-2	AGFG2_HUMAN	AGFG2	156	Homo sapiens		Isoform 2 of Arf-GAP domain and FG repeat-containing protein 2	1	0.9989	2	2	0	2	0	0	0	1	0	1	0	0	0	0	0	0	0	0	0	0	0	0	0	0	0	0	0	0	0	0	0	1	0	1	0	0	0	0	0	0
sp|O95104-2|SCAF4_HUMAN	O95104-2	SCAF4_HUMAN	SCAF4	1125	Homo sapiens		Isoform 2 of SR-related and CTD-associated factor 4	1	0.999	3	19	0	19	4	4	2	2	0	1	0	0	3	1	1	1	0	0	0	0	0	0	0	0	0	0	0	0	4	4	2	2	0	1	0	0	3	1	1	1
sp|O95139|NDUB6_HUMAN	O95139	NDUB6_HUMAN	NDUFB6	128	Homo sapiens	1:Experimental evidence at protein level	NADH dehydrogenase [ubiquinone] 1 beta subcomplex subunit 6	1	0.999	2	12	11	12	1	1	2	2	2	2	0	1	0	0	0	1	1	1	2	1	2	2	0	1	0	0	0	1	1	1	2	2	2	2	0	1	0	0	0	1
sp|O95140|MFN2_HUMAN	O95140	MFN2_HUMAN	MFN2	757	Homo sapiens	1:Experimental evidence at protein level	Mitofusin-2	1	0.999	2	10	5	10	0	0	2	1	1	2	0	2	0	1	0	1	0	0	0	0	1	1	0	2	0	0	0	1	0	0	2	1	1	2	0	2	0	1	0	1
sp|O95154|ARK73_HUMAN	O95154	ARK73_HUMAN	AKR7A3	331	Homo sapiens	1:Experimental evidence at protein level	Aflatoxin B1 aldehyde reductase member 3	1	0.999	4	10	5	10	0	1	3	5	1	0	0	0	0	0	0	0	0	1	1	2	1	0	0	0	0	0	0	0	0	1	3	5	1	0	0	0	0	0	0	0
sp|O95155-2|UBE4B_HUMAN	O95155-2	UBE4B_HUMAN	UBE4B	1173	Homo sapiens		Isoform 2 of Ubiquitin conjugation factor E4 B	0.9997	0.999	2	4	0	4	0	0	1	2	0	0	0	0	1	0	0	0	0	0	0	0	0	0	0	0	0	0	0	0	0	0	1	2	0	0	0	0	1	0	0	0
sp|O95159|ZFPL1_HUMAN	O95159	ZFPL1_HUMAN	ZFPL1	310	Homo sapiens	1:Experimental evidence at protein level	Zinc finger protein-like 1	1	0.999	3	17	17	17	0	1	4	2	2	2	0	3	1	1	1	0	0	1	4	2	2	2	0	3	1	1	1	0	0	1	4	2	2	2	0	3	1	1	1	0
sp|O95163|ELP1_HUMAN	O95163	ELP1_HUMAN	ELP1	1332	Homo sapiens	1:Experimental evidence at protein level	Elongator complex protein 1	1	0.999	6	21	21	21	1	2	2	2	0	2	0	1	2	2	4	3	1	2	2	2	0	2	0	1	2	2	4	3	1	2	2	2	0	2	0	1	2	2	4	3
sp|O95168-2|NDUB4_HUMAN	O95168-2	NDUB4_HUMAN	NDUFB4	120	Homo sapiens		Isoform 2 of NADH dehydrogenase [ubiquinone] 1 beta subcomplex subunit 4	1	0.999	2	16	0	16	1	1	2	3	1	1	0	1	2	1	2	1	0	0	0	0	0	0	0	0	0	0	0	0	1	1	2	3	1	1	0	1	2	1	2	1
sp|O95169-2|NDUB8_HUMAN	O95169-2	NDUB8_HUMAN	NDUFB8	172	Homo sapiens		Isoform 2 of NADH dehydrogenase [ubiquinone] 1 beta subcomplex subunit 8, mitochondrial	0.9469	0.999	1	22	0	22	5	4	0	0	2	5	0	0	1	1	1	3	0	0	0	0	0	0	0	0	0	0	0	0	5	4	0	0	2	5	0	0	1	1	1	3
sp|O95182|NDUA7_HUMAN	O95182	NDUA7_HUMAN	NDUFA7	113	Homo sapiens	1:Experimental evidence at protein level	NADH dehydrogenase [ubiquinone] 1 alpha subcomplex subunit 7	1	0.999	2	38	38	38	3	2	2	3	5	3	1	2	4	3	7	3	3	2	2	3	5	3	1	2	4	3	7	3	3	2	2	3	5	3	1	2	4	3	7	3
sp|O95197-3|RTN3_HUMAN	O95197-3	RTN3_HUMAN	RTN3	236	Homo sapiens		Isoform 3 of Reticulon-3	1	0.999	3	44	0	44	2	5	6	3	7	2	3	4	4	2	3	3	0	0	0	0	0	0	0	0	0	0	0	0	2	5	6	3	7	2	3	4	4	2	3	3
sp|O95202|LETM1_HUMAN	O95202	LETM1_HUMAN	LETM1	739	Homo sapiens	1:Experimental evidence at protein level	Mitochondrial proton/calcium exchanger protein	1	0.999	13	165	133	165	17	12	16	15	23	24	8	8	13	9	9	11	12	6	13	11	23	22	8	6	11	7	6	8	17	12	16	15	23	24	8	8	13	9	9	11
sp|O95208-2|EPN2_HUMAN	O95208-2	EPN2_HUMAN	EPN2	584	Homo sapiens		Isoform 2 of Epsin-2	0.8922	0.9978	1	1	0	1	0	0	0	1	0	0	0	0	0	0	0	0	0	0	0	0	0	0	0	0	0	0	0	0	0	0	0	1	0	0	0	0	0	0	0	0
sp|O95218-2|ZRAB2_HUMAN	O95218-2	ZRAB2_HUMAN	ZRANB2	320	Homo sapiens		Isoform 2 of Zinc finger Ran-binding domain-containing protein 2	0.9469	0.999	1	20	0	20	2	0	0	0	1	3	4	2	3	1	2	2	0	0	0	0	0	0	0	0	0	0	0	0	2	0	0	0	1	3	4	2	3	1	2	2
sp|O95219-2|SNX4_HUMAN	O95219-2	SNX4_HUMAN	SNX4	305	Homo sapiens		Isoform 2 of Sorting nexin-4	1	0.999	5	17	0	17	2	3	2	2	4	1	0	0	0	1	0	2	0	0	0	0	0	0	0	0	0	0	0	0	2	3	2	2	4	1	0	0	0	1	0	2
sp|O95232|LC7L3_HUMAN	O95232	LC7L3_HUMAN	LUC7L3	432	Homo sapiens	1:Experimental evidence at protein level	Luc7-like protein 3	1	0.999	7	36	22	40	2	3	0	1	4	3	4	3	3	4	5	4	2	2	0	1	2	2	3	2	1	3	2	2	2	3	1	4	4	3	4	3	3	4	5	4
sp|O95248-4|MTMR5_HUMAN	O95248-4	MTMR5_HUMAN	SBF1	1894	Homo sapiens		Isoform 4 of Myotubularin-related protein 5	1	0.999	3	7	0	7	0	0	1	1	1	1	0	0	0	1	0	2	0	0	0	0	0	0	0	0	0	0	0	0	0	0	1	1	1	1	0	0	0	1	0	2
sp|O95249|GOSR1_HUMAN	O95249	GOSR1_HUMAN	GOSR1	250	Homo sapiens	1:Experimental evidence at protein level	Golgi SNAP receptor complex member 1	1	0.999	4	30	20	30	2	1	3	3	4	6	1	2	2	3	2	1	2	1	2	2	2	2	1	1	2	2	2	1	2	1	3	3	4	6	1	2	2	3	2	1
sp|O95260-2|ATE1_HUMAN	O95260-2	ATE1_HUMAN	ATE1	518	Homo sapiens		Isoform ATE1-2 of Arginyl-tRNA--protein transferase 1	1	0.999	4	7	1	7	0	0	1	2	2	1	0	1	0	0	0	0	0	0	0	1	0	0	0	0	0	0	0	0	0	0	1	2	2	1	0	1	0	0	0	0
sp|O95292|VAPB_HUMAN	O95292	VAPB_HUMAN	VAPB	243	Homo sapiens	1:Experimental evidence at protein level	Vesicle-associated membrane protein-associated protein B/C	1	0.999	7	123	82	123	12	9	8	10	11	8	8	10	13	11	13	10	10	6	3	2	7	5	6	7	10	8	10	8	12	9	8	10	11	8	8	10	13	11	13	10
sp|O95295|SNAPN_HUMAN	O95295	SNAPN_HUMAN	SNAPIN	136	Homo sapiens	1:Experimental evidence at protein level	SNARE-associated protein Snapin	0.9469	0.999	1	2	2	2	0	0	1	1	0	0	0	0	0	0	0	0	0	0	1	1	0	0	0	0	0	0	0	0	0	0	1	1	0	0	0	0	0	0	0	0
sp|O95298-2|NDUC2_HUMAN	O95298-2	NDUC2_HUMAN	NDUFC2	96	Homo sapiens		Isoform 4 of NADH dehydrogenase [ubiquinone] 1 subunit C2	1	0.999	3	23	0	23	5	3	3	1	2	1	0	0	2	1	4	1	0	0	0	0	0	0	0	0	0	0	0	0	5	3	3	1	2	1	0	0	2	1	4	1
sp|O95299|NDUAA_HUMAN	O95299	NDUAA_HUMAN	NDUFA10	355	Homo sapiens	1:Experimental evidence at protein level	NADH dehydrogenase [ubiquinone] 1 alpha subcomplex subunit 10, mitochondrial	1	0.999	6	32	4	32	2	6	1	2	7	3	1	1	2	1	3	3	0	2	0	0	2	0	0	0	0	0	0	0	2	6	1	2	7	3	1	1	2	1	3	3
sp|O95302-3|FKBP9_HUMAN	O95302-3	FKBP9_HUMAN	FKBP9	623	Homo sapiens		Isoform 3 of Peptidyl-prolyl cis-trans isomerase FKBP9	0.9998	0.999	2	11	0	11	0	0	0	0	0	0	2	0	3	4	1	1	0	0	0	0	0	0	0	0	0	0	0	0	0	0	0	0	0	0	2	0	3	4	1	1
sp|O95336|6PGL_HUMAN	O95336	6PGL_HUMAN	PGLS	258	Homo sapiens	1:Experimental evidence at protein level	6-phosphogluconolactonase	1	0.999	3	40	40	40	5	3	2	1	2	3	2	3	4	5	7	3	5	3	2	1	2	3	2	3	4	5	7	3	5	3	2	1	2	3	2	3	4	5	7	3
sp|O95340-2|PAPS2_HUMAN	O95340-2	PAPS2_HUMAN	PAPSS2	619	Homo sapiens		Isoform B of Bifunctional 3'-phosphoadenosine 5'-phosphosulfate synthase 2	1	0.999	9	101	0	101	13	18	6	7	18	12	1	4	6	6	6	4	0	0	0	0	0	0	0	0	0	0	0	0	13	18	6	7	18	12	1	4	6	6	6	4
sp|O95347-2|SMC2_HUMAN	O95347-2	SMC2_HUMAN	SMC2	1099	Homo sapiens		Isoform 2 of Structural maintenance of chromosomes protein 2	1	0.999	7	35	0	35	1	0	0	0	0	4	4	5	5	5	6	5	0	0	0	0	0	0	0	0	0	0	0	0	1	0	0	0	0	4	4	5	5	5	6	5
sp|O95352-2|ATG7_HUMAN	O95352-2	ATG7_HUMAN	ATG7	676	Homo sapiens		Isoform 2 of Ubiquitin-like modifier-activating enzyme ATG7	1	0.9988	3	4	0	4	2	1	0	0	0	0	0	0	0	0	0	1	0	0	0	0	0	0	0	0	0	0	0	0	2	1	0	0	0	0	0	0	0	0	0	1
sp|O95359-3|TACC2_HUMAN	O95359-3	TACC2_HUMAN	TACC2	2871	Homo sapiens		Isoform 3 of Transforming acidic coiled-coil-containing protein 2	1	0.999	4	24	0	24	3	2	1	1	1	1	0	1	6	1	3	4	0	0	0	0	0	0	0	0	0	0	0	0	3	2	1	1	1	1	0	1	6	1	3	4
sp|O95361|TRI16_HUMAN	O95361	TRI16_HUMAN	TRIM16	564	Homo sapiens	1:Experimental evidence at protein level	Tripartite motif-containing protein 16	1	0.999	7	25	15	25	3	1	9	4	3	1	0	0	1	2	0	1	2	0	7	1	2	0	0	0	1	1	0	1	3	1	9	4	3	1	0	0	1	2	0	1
sp|O95365|ZBT7A_HUMAN	O95365	ZBT7A_HUMAN	ZBTB7A	584	Homo sapiens	1:Experimental evidence at protein level	Zinc finger and BTB domain-containing protein 7A	1	0.996	2	6	6	6	0	0	5	1	0	0	0	0	0	0	0	0	0	0	5	1	0	0	0	0	0	0	0	0	0	0	5	1	0	0	0	0	0	0	0	0
sp|O95372|LYPA2_HUMAN	O95372	LYPA2_HUMAN	LYPLA2	231	Homo sapiens	1:Experimental evidence at protein level	Acyl-protein thioesterase 2	1	0.999	6	91	91	91	8	11	3	5	16	11	6	7	7	6	6	5	8	11	3	5	16	11	6	7	7	6	6	5	8	11	3	5	16	11	6	7	7	6	6	5
sp|O95373|IPO7_HUMAN	O95373	IPO7_HUMAN	IPO7	1038	Homo sapiens	1:Experimental evidence at protein level	Importin-7	1	0.999	10	97	97	97	4	10	8	6	7	6	9	9	12	8	7	11	4	10	8	6	7	6	9	9	12	8	7	11	4	10	8	6	7	6	9	9	12	8	7	11
sp|O95376|ARI2_HUMAN	O95376	ARI2_HUMAN	ARIH2	493	Homo sapiens	1:Experimental evidence at protein level	E3 ubiquitin-protein ligase ARIH2	1	0.9988	3	4	4	4	1	0	0	2	0	0	0	1	0	0	0	0	1	0	0	2	0	0	0	1	0	0	0	0	1	0	0	2	0	0	0	1	0	0	0	0
sp|O95382-2|M3K6_HUMAN	O95382-2	M3K6_HUMAN	MAP3K6	797	Homo sapiens		Isoform 2 of Mitogen-activated protein kinase kinase kinase 6	0.9442	0.9989	1	1	0	1	0	0	1	0	0	0	0	0	0	0	0	0	0	0	0	0	0	0	0	0	0	0	0	0	0	0	1	0	0	0	0	0	0	0	0	0
sp|O95394-3|AGM1_HUMAN	O95394-3	AGM1_HUMAN	PGM3	566	Homo sapiens		Isoform 2 of Phosphoacetylglucosamine mutase	1	0.999	7	35	0	35	4	8	6	3	7	2	0	2	2	0	1	0	0	0	0	0	0	0	0	0	0	0	0	0	4	8	6	3	7	2	0	2	2	0	1	0
sp|O95395|GCNT3_HUMAN	O95395	GCNT3_HUMAN	GCNT3	438	Homo sapiens	2:Experimental evidence at transcript level	Beta-1,3-galactosyl-O-glycosyl-glycoprotein beta-1,6-N-acetylglucosaminyltransferase 3	1	0.999	6	30	30	30	7	7	2	0	5	9	0	0	0	0	0	0	7	7	2	0	5	9	0	0	0	0	0	0	7	7	2	0	5	9	0	0	0	0	0	0
sp|O95433-2|AHSA1_HUMAN	O95433-2	AHSA1_HUMAN	AHSA1	288	Homo sapiens		Isoform 2 of Activator of 90 kDa heat shock protein ATPase homolog 1	1	0.999	3	62	0	62	5	5	5	4	9	9	2	3	5	4	6	5	0	0	0	0	0	0	0	0	0	0	0	0	5	5	5	4	9	9	2	3	5	4	6	5
sp|O95453-2|PARN_HUMAN	O95453-2	PARN_HUMAN	PARN	578	Homo sapiens		Isoform 2 of Poly(A)-specific ribonuclease PARN	0.9983	0.999	2	7	0	7	0	1	0	0	1	1	0	0	2	0	0	2	0	0	0	0	0	0	0	0	0	0	0	0	0	1	0	0	1	1	0	0	2	0	0	2
sp|O95456-2|PSMG1_HUMAN	O95456-2	PSMG1_HUMAN	PSMG1	267	Homo sapiens		Isoform 2 of Proteasome assembly chaperone 1	1	0.999	2	5	0	5	1	0	2	2	0	0	0	0	0	0	0	0	0	0	0	0	0	0	0	0	0	0	0	0	1	0	2	2	0	0	0	0	0	0	0	0
sp|O95470|SGPL1_HUMAN	O95470	SGPL1_HUMAN	SGPL1	568	Homo sapiens	1:Experimental evidence at protein level	Sphingosine-1-phosphate lyase 1	1	0.999	5	23	23	23	5	1	0	0	3	2	1	2	5	1	2	1	5	1	0	0	3	2	1	2	5	1	2	1	5	1	0	0	3	2	1	2	5	1	2	1
sp|O95471-2|CLD7_HUMAN	O95471-2	CLD7_HUMAN	CLDN7	158	Homo sapiens		Isoform 2 of Claudin-7	0.9469	0.999	1	3	0	3	1	1	0	0	1	0	0	0	0	0	0	0	0	0	0	0	0	0	0	0	0	0	0	0	1	1	0	0	1	0	0	0	0	0	0	0
sp|O95478|NSA2_HUMAN	O95478	NSA2_HUMAN	NSA2	260	Homo sapiens	1:Experimental evidence at protein level	Ribosome biogenesis protein NSA2 homolog	0.9469	0.999	1	3	3	3	0	0	1	1	1	0	0	0	0	0	0	0	0	0	1	1	1	0	0	0	0	0	0	0	0	0	1	1	1	0	0	0	0	0	0	0
sp|O95479-2|G6PE_HUMAN	O95479-2	G6PE_HUMAN	H6PD	802	Homo sapiens		Isoform 2 of GDH/6PGL endoplasmic bifunctional protein	1	0.999	2	16	0	16	1	0	1	1	1	1	0	2	3	2	2	2	0	0	0	0	0	0	0	0	0	0	0	0	1	0	1	1	1	1	0	2	3	2	2	2
sp|O95486|SC24A_HUMAN	O95486	SC24A_HUMAN	SEC24A	1093	Homo sapiens	1:Experimental evidence at protein level	Protein transport protein Sec24A	0.9962	0.999	2	2	2	3	0	0	0	0	2	0	0	0	0	0	0	0	0	0	0	0	2	0	0	0	0	0	0	0	0	0	0	0	2	1	0	0	0	0	0	0
sp|O95487-2|SC24B_HUMAN	O95487-2	SC24B_HUMAN	SEC24B	1233	Homo sapiens		Isoform 2 of Protein transport protein Sec24B	1	0.999	5	32	0	32	3	2	2	4	4	3	0	3	1	3	3	4	0	0	0	0	0	0	0	0	0	0	0	0	3	2	2	4	4	3	0	3	1	3	3	4
sp|O95562|SFT2B_HUMAN	O95562	SFT2B_HUMAN	SFT2D2	160	Homo sapiens	1:Experimental evidence at protein level	Vesicle transport protein SFT2B	0.9469	0.999	1	3	3	3	0	2	0	0	1	0	0	0	0	0	0	0	0	2	0	0	1	0	0	0	0	0	0	0	0	2	0	0	1	0	0	0	0	0	0	0
sp|O95563|MPC2_HUMAN	O95563	MPC2_HUMAN	MPC2	127	Homo sapiens	1:Experimental evidence at protein level	Mitochondrial pyruvate carrier 2	1	0.999	2	23	23	23	2	1	1	2	4	2	0	1	4	1	1	4	2	1	1	2	4	2	0	1	4	1	1	4	2	1	1	2	4	2	0	1	4	1	1	4
sp|O95571|ETHE1_HUMAN	O95571	ETHE1_HUMAN	ETHE1	254	Homo sapiens	1:Experimental evidence at protein level	Persulfide dioxygenase ETHE1, mitochondrial	1	0.999	7	78	78	78	13	11	10	7	13	7	1	3	3	2	4	4	13	11	10	7	13	7	1	3	3	2	4	4	13	11	10	7	13	7	1	3	3	2	4	4
sp|O95573|ACSL3_HUMAN	O95573	ACSL3_HUMAN	ACSL3	720	Homo sapiens	1:Experimental evidence at protein level	Fatty acid CoA ligase Acsl3	1	0.999	17	194	175	194	11	12	15	10	19	14	17	15	20	19	21	21	9	9	15	10	18	14	14	15	17	17	18	19	11	12	15	10	19	14	17	15	20	19	21	21
sp|O95602|RPA1_HUMAN	O95602	RPA1_HUMAN	POLR1A	1720	Homo sapiens	1:Experimental evidence at protein level	DNA-directed RNA polymerase I subunit RPA1	1	0.999	5	8	8	8	1	0	4	0	0	0	0	0	2	1	0	0	1	0	4	0	0	0	0	0	2	1	0	0	1	0	4	0	0	0	0	0	2	1	0	0
sp|O95613-2|PCNT_HUMAN	O95613-2	PCNT_HUMAN	PCNT	3139	Homo sapiens		Isoform 2 of Pericentrin	0.9454	0.999	1	1	0	1	0	0	1	0	0	0	0	0	0	0	0	0	0	0	0	0	0	0	0	0	0	0	0	0	0	0	1	0	0	0	0	0	0	0	0	0
sp|O95619|YETS4_HUMAN	O95619	YETS4_HUMAN	YEATS4	227	Homo sapiens	1:Experimental evidence at protein level	YEATS domain-containing protein 4	0.91	0.9982	1	2	2	2	0	0	0	0	0	0	0	0	0	0	1	1	0	0	0	0	0	0	0	0	0	0	1	1	0	0	0	0	0	0	0	0	0	0	1	1
sp|O95630|STABP_HUMAN	O95630	STABP_HUMAN	STAMBP	424	Homo sapiens	1:Experimental evidence at protein level	STAM-binding protein	1	0.999	4	40	13	40	2	2	4	3	3	4	2	3	3	6	3	5	1	1	1	1	0	2	0	1	1	2	1	2	2	2	4	3	3	4	2	3	3	6	3	5
sp|O95639-2|CPSF4_HUMAN	O95639-2	CPSF4_HUMAN	CPSF4	244	Homo sapiens		Isoform 2 of Cleavage and polyadenylation specificity factor subunit 4	1	0.999	2	19	0	19	1	1	2	1	2	2	1	2	1	1	2	3	0	0	0	0	0	0	0	0	0	0	0	0	1	1	2	1	2	2	1	2	1	1	2	3
sp|O95671-2|ASML_HUMAN	O95671-2	ASML_HUMAN	ASMTL	605	Homo sapiens		Isoform 2 of Probable bifunctional dTTP/UTP pyrophosphatase/methyltransferase protein	1	0.999	4	15	0	15	0	0	4	4	4	3	0	0	0	0	0	0	0	0	0	0	0	0	0	0	0	0	0	0	0	0	4	4	4	3	0	0	0	0	0	0
sp|O95674|CDS2_HUMAN	O95674	CDS2_HUMAN	CDS2	445	Homo sapiens	1:Experimental evidence at protein level	Phosphatidate cytidylyltransferase 2	1	0.999	2	5	5	5	0	0	0	0	0	0	0	1	1	0	1	2	0	0	0	0	0	0	0	1	1	0	1	2	0	0	0	0	0	0	0	1	1	0	1	2
sp|O95716|RAB3D_HUMAN	O95716	RAB3D_HUMAN	RAB3D	219	Homo sapiens	1:Experimental evidence at protein level	Ras-related protein Rab-3D	0.9997	0.999	2	8	5	8	2	1	0	0	2	0	0	0	0	0	2	1	0	0	0	0	2	0	0	0	0	0	2	1	2	1	0	0	2	0	0	0	0	0	2	1
sp|O95721|SNP29_HUMAN	O95721	SNP29_HUMAN	SNAP29	258	Homo sapiens	1:Experimental evidence at protein level	Synaptosomal-associated protein 29	0.7321	0.9935	1	3	3	3	0	0	1	2	0	0	0	0	0	0	0	0	0	0	1	2	0	0	0	0	0	0	0	0	0	0	1	2	0	0	0	0	0	0	0	0
sp|O95747|OXSR1_HUMAN	O95747	OXSR1_HUMAN	OXSR1	527	Homo sapiens	1:Experimental evidence at protein level	Serine/threonine-protein kinase OSR1	1	0.999	5	24	24	33	2	1	3	4	3	1	3	0	1	1	2	3	2	1	3	4	3	1	3	0	1	1	2	3	4	3	3	4	5	1	3	0	3	1	2	4
sp|O95757|HS74L_HUMAN	O95757	HS74L_HUMAN	HSPA4L	839	Homo sapiens	1:Experimental evidence at protein level	Heat shock 70 kDa protein 4L	1	0.999	15	136	136	155	10	11	6	6	13	10	10	13	16	14	14	13	10	11	6	6	13	10	10	13	16	14	14	13	15	14	6	6	14	12	10	13	17	15	16	17
sp|O95758-1|PTBP3_HUMAN	O95758-1	PTBP3_HUMAN	PTBP3	521	Homo sapiens		Isoform 1 of Polypyrimidine tract-binding protein 3	1	0.999	8	65	0	115	7	8	2	3	6	8	8	2	7	4	5	5	0	0	0	0	0	0	0	0	0	0	0	0	12	10	2	3	15	13	8	6	16	9	13	8
sp|O95777|LSM8_HUMAN	O95777	LSM8_HUMAN	LSM8	96	Homo sapiens	1:Experimental evidence at protein level	U6 snRNA-associated Sm-like protein LSm8	0.9469	0.999	1	16	16	16	2	1	1	2	2	1	1	1	1	1	2	1	2	1	1	2	2	1	1	1	1	1	2	1	2	1	1	2	2	1	1	1	1	1	2	1
sp|O95782-2|AP2A1_HUMAN	O95782-2	AP2A1_HUMAN	AP2A1	955	Homo sapiens		Isoform B of AP-2 complex subunit alpha-1	1	0.999	9	44	0	105	3	6	5	3	5	4	2	2	4	3	3	4	0	0	0	0	0	0	0	0	0	0	0	0	9	12	9	7	15	10	6	7	9	5	8	8
sp|O95793-2|STAU1_HUMAN	O95793-2	STAU1_HUMAN	STAU1	496	Homo sapiens		Isoform Short of Double-stranded RNA-binding protein Staufen homolog 1	1	0.999	8	79	0	79	11	8	7	4	5	6	8	4	6	5	8	7	0	0	0	0	0	0	0	0	0	0	0	0	11	8	7	4	5	6	8	4	6	5	8	7
sp|O95816-2|BAG2_HUMAN	O95816-2	BAG2_HUMAN	BAG2	178	Homo sapiens		Isoform 2 of BAG family molecular chaperone regulator 2	1	0.999	4	27	0	27	1	2	1	1	5	2	2	3	3	3	2	2	0	0	0	0	0	0	0	0	0	0	0	0	1	2	1	1	5	2	2	3	3	3	2	2
sp|O95817|BAG3_HUMAN	O95817	BAG3_HUMAN	BAG3	575	Homo sapiens	1:Experimental evidence at protein level	BAG family molecular chaperone regulator 3	1	0.999	8	21	21	21	0	2	8	5	3	1	0	1	0	0	0	1	0	2	8	5	3	1	0	1	0	0	0	1	0	2	8	5	3	1	0	1	0	0	0	1
sp|O95822-2|DCMC_HUMAN	O95822-2	DCMC_HUMAN	MLYCD	454	Homo sapiens		Isoform Cytoplasmic+peroxisomal of Malonyl-CoA decarboxylase, mitochondrial	0.9999	0.999	2	6	0	6	0	0	3	1	1	1	0	0	0	0	0	0	0	0	0	0	0	0	0	0	0	0	0	0	0	0	3	1	1	1	0	0	0	0	0	0
sp|O95831-3|AIFM1_HUMAN	O95831-3	AIFM1_HUMAN	AIFM1	609	Homo sapiens		Isoform 3 of Apoptosis-inducing factor 1, mitochondrial	1	0.999	12	119	0	119	11	10	14	10	15	13	3	9	8	7	9	10	0	0	0	0	0	0	0	0	0	0	0	0	11	10	14	10	15	13	3	9	8	7	9	10
sp|O95834-2|EMAL2_HUMAN	O95834-2	EMAL2_HUMAN	EML2	796	Homo sapiens		Isoform 2 of Echinoderm microtubule-associated protein-like 2	1	0.999	7	43	0	43	2	3	7	7	5	6	2	2	3	2	2	2	0	0	0	0	0	0	0	0	0	0	0	0	2	3	7	7	5	6	2	2	3	2	2	2
sp|O95837|GNA14_HUMAN	O95837	GNA14_HUMAN	GNA14	355	Homo sapiens	1:Experimental evidence at protein level	Guanine nucleotide-binding protein subunit alpha-14	0.9004	0.998	1	2	2	2	0	0	0	0	0	1	0	1	0	0	0	0	0	0	0	0	0	1	0	1	0	0	0	0	0	0	0	0	0	1	0	1	0	0	0	0
sp|O95861-4|BPNT1_HUMAN	O95861-4	BPNT1_HUMAN	BPNT1	272	Homo sapiens		Isoform 4 of 3'(2'),5'-bisphosphate nucleotidase 1	1	0.999	5	67	0	67	7	8	10	5	8	9	1	3	3	5	2	6	0	0	0	0	0	0	0	0	0	0	0	0	7	8	10	5	8	9	1	3	3	5	2	6
sp|O95865|DDAH2_HUMAN	O95865	DDAH2_HUMAN	DDAH2	285	Homo sapiens	1:Experimental evidence at protein level	N(G),N(G)-dimethylarginine dimethylaminohydrolase 2	1	0.999	4	20	20	20	3	2	1	3	3	1	2	1	1	1	1	1	3	2	1	3	3	1	2	1	1	1	1	1	3	2	1	3	3	1	2	1	1	1	1	1
sp|O95870-2|ABHGA_HUMAN	O95870-2	ABHGA_HUMAN	ABHD16A	525	Homo sapiens		Isoform 2 of Phosphatidylserine lipase ABHD16A	0.7887	0.9952	1	1	0	1	0	0	1	0	0	0	0	0	0	0	0	0	0	0	0	0	0	0	0	0	0	0	0	0	0	0	1	0	0	0	0	0	0	0	0	0
sp|O95873|CF047_HUMAN	O95873	CF047_HUMAN	C6orf47	294	Homo sapiens	1:Experimental evidence at protein level	Uncharacterized protein C6orf47	0.6226	0.9893	1	1	1	1	0	0	1	0	0	0	0	0	0	0	0	0	0	0	1	0	0	0	0	0	0	0	0	0	0	0	1	0	0	0	0	0	0	0	0	0
sp|O95881|TXD12_HUMAN	O95881	TXD12_HUMAN	TXNDC12	172	Homo sapiens	1:Experimental evidence at protein level	Thioredoxin domain-containing protein 12	1	0.999	3	38	38	38	3	2	3	1	3	4	3	3	3	4	4	5	3	2	3	1	3	4	3	3	3	4	4	5	3	2	3	1	3	4	3	3	3	4	4	5
sp|O95926|SYF2_HUMAN	O95926	SYF2_HUMAN	SYF2	243	Homo sapiens	1:Experimental evidence at protein level	Pre-mRNA-splicing factor SYF2	1	0.9964	1	2	2	2	0	0	0	1	0	0	0	0	0	0	0	1	0	0	0	1	0	0	0	0	0	0	0	1	0	0	0	1	0	0	0	0	0	0	0	1
sp|O95983-2|MBD3_HUMAN	O95983-2	MBD3_HUMAN	MBD3	259	Homo sapiens		Isoform 2 of Methyl-CpG-binding domain protein 3	1	0.999	2	4	0	4	0	0	2	2	0	0	0	0	0	0	0	0	0	0	0	0	0	0	0	0	0	0	0	0	0	0	2	2	0	0	0	0	0	0	0	0
sp|O95989|NUDT3_HUMAN	O95989	NUDT3_HUMAN	NUDT3	172	Homo sapiens	1:Experimental evidence at protein level	Diphosphoinositol polyphosphate phosphohydrolase 1	0.9259	0.9986	1	2	2	2	0	0	0	0	1	0	0	0	0	0	0	1	0	0	0	0	1	0	0	0	0	0	0	1	0	0	0	0	1	0	0	0	0	0	0	1
sp|O95994|AGR2_HUMAN	O95994	AGR2_HUMAN	AGR2	175	Homo sapiens	1:Experimental evidence at protein level	Anterior gradient protein 2 homolog	1	0.999	13	1498	1449	1498	138	144	196	172	147	164	119	71	88	82	96	81	135	137	181	167	140	158	117	71	86	82	95	80	138	144	196	172	147	164	119	71	88	82	96	81
sp|O95997|PTTG1_HUMAN	O95997	PTTG1_HUMAN	PTTG1	202	Homo sapiens	1:Experimental evidence at protein level	Securin	0.9466	0.999	1	2	2	2	0	0	0	0	0	0	0	1	1	0	0	0	0	0	0	0	0	0	0	1	1	0	0	0	0	0	0	0	0	0	0	1	1	0	0	0
sp|O96000-2|NDUBA_HUMAN	O96000-2	NDUBA_HUMAN	NDUFB10	168	Homo sapiens		Isoform 2 of NADH dehydrogenase [ubiquinone] 1 beta subcomplex subunit 10	1	0.999	5	57	0	57	7	7	7	3	6	5	1	2	3	6	5	5	0	0	0	0	0	0	0	0	0	0	0	0	7	7	7	3	6	5	1	2	3	6	5	5
sp|O96005-3|CLPT1_HUMAN	O96005-3	CLPT1_HUMAN	CLPTM1	567	Homo sapiens		Isoform 2 of Putative lipid scramblase CLPTM1	0.9469	0.999	1	10	0	10	0	0	0	1	0	0	0	2	3	1	1	2	0	0	0	0	0	0	0	0	0	0	0	0	0	0	0	1	0	0	0	2	3	1	1	2
sp|O96011-2|PX11B_HUMAN	O96011-2	PX11B_HUMAN	PEX11B	245	Homo sapiens		Isoform 2 of Peroxisomal membrane protein 11B	0.6883	0.992	1	1	0	1	0	0	0	0	0	0	0	0	1	0	0	0	0	0	0	0	0	0	0	0	0	0	0	0	0	0	0	0	0	0	0	0	1	0	0	0
sp|O96013-2|PAK4_HUMAN	O96013-2	PAK4_HUMAN	PAK4	426	Homo sapiens		Isoform 2 of Serine/threonine-protein kinase PAK 4	1	0.999	3	10	0	10	1	1	3	1	1	0	0	0	0	1	1	1	0	0	0	0	0	0	0	0	0	0	0	0	1	1	3	1	1	0	0	0	0	1	1	1
sp|O96019-2|ACL6A_HUMAN	O96019-2	ACL6A_HUMAN	ACTL6A	387	Homo sapiens		Isoform 2 of Actin-like protein 6A	1	0.999	7	79	0	79	5	6	1	3	9	7	8	8	9	6	9	8	0	0	0	0	0	0	0	0	0	0	0	0	5	6	1	3	9	7	8	8	9	6	9	8
sp|P00167|CYB5_HUMAN	P00167	CYB5_HUMAN	CYB5A	134	Homo sapiens	1:Experimental evidence at protein level	Cytochrome b5	1	0.999	3	57	57	57	3	5	6	7	4	5	5	4	4	5	4	5	3	5	6	7	4	5	5	4	4	5	4	5	3	5	6	7	4	5	5	4	4	5	4	5
sp|P00338|LDHA_HUMAN	P00338	LDHA_HUMAN	LDHA	332	Homo sapiens	1:Experimental evidence at protein level	L-lactate dehydrogenase A chain	1	0.999	22	731	0	757	69	70	71	57	86	77	55	46	49	55	51	45	0	0	0	0	0	0	0	0	0	0	0	0	73	73	71	57	91	78	56	48	50	60	54	46
sp|P00352|AL1A1_HUMAN	P00352	AL1A1_HUMAN	ALDH1A1	501	Homo sapiens	1:Experimental evidence at protein level	Aldehyde dehydrogenase 1A1	1	0.999	20	442	442	448	60	69	78	55	60	62	8	7	9	10	15	9	60	69	78	55	60	62	8	7	9	10	15	9	63	70	78	55	61	63	8	7	9	10	15	9
sp|P00367|DHE3_HUMAN	P00367	DHE3_HUMAN	GLUD1	558	Homo sapiens	1:Experimental evidence at protein level	Glutamate dehydrogenase 1, mitochondrial	1	0.999	17	288	63	288	30	24	15	13	40	32	23	19	20	30	21	21	5	4	5	5	8	8	6	4	2	14	0	2	30	24	15	13	40	32	23	19	20	30	21	21
sp|P00374-2|DYR_HUMAN	P00374-2	DYR_HUMAN	DHFR	135	Homo sapiens		Isoform 2 of Dihydrofolate reductase	0.9469	0.999	1	12	0	12	0	0	0	0	0	1	1	1	2	2	2	3	0	0	0	0	0	0	0	0	0	0	0	0	0	0	0	0	0	1	1	1	2	2	2	3
sp|P00387-2|NB5R3_HUMAN	P00387-2	NB5R3_HUMAN	CYB5R3	278	Homo sapiens		Isoform 2 of NADH-cytochrome b5 reductase 3	1	0.999	7	118	0	118	12	10	12	12	9	14	6	8	8	8	8	11	0	0	0	0	0	0	0	0	0	0	0	0	12	10	12	12	9	14	6	8	8	8	8	11
sp|P00390-2|GSHR_HUMAN	P00390-2	GSHR_HUMAN	GSR	479	Homo sapiens		Isoform Cytoplasmic of Glutathione reductase, mitochondrial	1	0.999	16	211	0	211	25	18	15	16	19	19	12	11	15	14	23	24	0	0	0	0	0	0	0	0	0	0	0	0	25	18	15	16	19	19	12	11	15	14	23	24
sp|P00395|COX1_HUMAN	P00395	COX1_HUMAN	MT-CO1	513	Homo sapiens	1:Experimental evidence at protein level	Cytochrome c oxidase subunit 1	0.9469	0.999	1	4	4	4	1	0	0	0	3	0	0	0	0	0	0	0	1	0	0	0	3	0	0	0	0	0	0	0	1	0	0	0	3	0	0	0	0	0	0	0
sp|P00403|COX2_HUMAN	P00403	COX2_HUMAN	MT-CO2	227	Homo sapiens	1:Experimental evidence at protein level	Cytochrome c oxidase subunit 2	0.9469	0.999	1	34	34	34	3	3	5	3	5	2	2	1	2	2	3	3	3	3	5	3	5	2	2	1	2	2	3	3	3	3	5	3	5	2	2	1	2	2	3	3
sp|P00414|COX3_HUMAN	P00414	COX3_HUMAN	MT-CO3	261	Homo sapiens	1:Experimental evidence at protein level	Cytochrome c oxidase subunit 3	1	0.999	2	37	37	37	2	2	5	5	3	3	3	1	3	4	3	3	2	2	5	5	3	3	3	1	3	4	3	3	2	2	5	5	3	3	3	1	3	4	3	3
sp|P00441|SODC_HUMAN	P00441	SODC_HUMAN	SOD1	154	Homo sapiens	1:Experimental evidence at protein level	Superoxide dismutase [Cu-Zn]	1	0.999	8	314	314	314	21	19	55	57	25	28	17	20	16	20	20	16	21	19	55	57	25	28	17	20	16	20	20	16	21	19	55	57	25	28	17	20	16	20	20	16
sp|P00491|PNPH_HUMAN	P00491	PNPH_HUMAN	PNP	289	Homo sapiens	1:Experimental evidence at protein level	Purine nucleoside phosphorylase	1	0.999	10	154	154	154	12	17	10	7	19	18	7	9	13	12	18	12	12	17	10	7	19	18	7	9	13	12	18	12	12	17	10	7	19	18	7	9	13	12	18	12
sp|P00492|HPRT_HUMAN	P00492	HPRT_HUMAN	HPRT1	218	Homo sapiens	1:Experimental evidence at protein level	Hypoxanthine-guanine phosphoribosyltransferase	1	0.999	6	80	80	80	8	7	4	3	8	8	6	6	6	8	9	7	8	7	4	3	8	8	6	6	6	8	9	7	8	7	4	3	8	8	6	6	6	8	9	7
sp|P00505|AATM_HUMAN	P00505	AATM_HUMAN	GOT2	430	Homo sapiens	1:Experimental evidence at protein level	Aspartate aminotransferase, mitochondrial	1	0.999	12	128	28	128	12	15	9	6	19	12	8	7	11	11	9	9	3	3	0	0	4	2	4	2	3	3	2	2	12	15	9	6	19	12	8	7	11	11	9	9
sp|P00558-2|PGK1_HUMAN	P00558-2	PGK1_HUMAN	PGK1	389	Homo sapiens		Isoform 2 of Phosphoglycerate kinase 1	1	0.999	19	1077	0	1077	103	112	123	125	122	112	59	66	62	70	68	55	0	0	0	0	0	0	0	0	0	0	0	0	103	112	123	125	122	112	59	66	62	70	68	55
sp|P00568|KAD1_HUMAN	P00568	KAD1_HUMAN	AK1	194	Homo sapiens	1:Experimental evidence at protein level	Adenylate kinase isoenzyme 1	1	0.999	10	142	142	142	9	11	18	17	27	17	7	7	8	7	9	5	9	11	18	17	27	17	7	7	8	7	9	5	9	11	18	17	27	17	7	7	8	7	9	5
sp|P00738-2|HPT_HUMAN	P00738-2	HPT_HUMAN	HP	347	Homo sapiens		Isoform 2 of Haptoglobin	1	0.999	4	6	0	6	0	6	0	0	0	0	0	0	0	0	0	0	0	0	0	0	0	0	0	0	0	0	0	0	0	6	0	0	0	0	0	0	0	0	0	0
sp|P00749-2|UROK_HUMAN	P00749-2	UROK_HUMAN	PLAU	414	Homo sapiens		Isoform 2 of Urokinase-type plasminogen activator	1	0.9988	3	12	0	12	0	0	2	0	0	1	2	1	1	2	1	2	0	0	0	0	0	0	0	0	0	0	0	0	0	0	2	0	0	1	2	1	1	2	1	2
sp|P00761|TRYP_PIG	P00761	TRYP_PIG		231	Sus scrofa	1:Experimental evidence at protein level	Trypsin	1	0.999	6	784	784	784	64	61	43	21	90	77	77	64	55	75	78	79	64	61	43	21	90	77	77	64	55	75	78	79	64	61	43	21	90	77	77	64	55	75	78	79
sp|P00918|CAH2_HUMAN	P00918	CAH2_HUMAN	CA2	260	Homo sapiens	1:Experimental evidence at protein level	Carbonic anhydrase 2	0.879	0.9975	1	1	0	1	0	0	1	0	0	0	0	0	0	0	0	0	0	0	0	0	0	0	0	0	0	0	0	0	0	0	1	0	0	0	0	0	0	0	0	0
sp|P00966|ASSY_HUMAN	P00966	ASSY_HUMAN	ASS1	412	Homo sapiens	1:Experimental evidence at protein level	Argininosuccinate synthase	1	0.999	3	30	30	30	2	3	1	2	3	2	2	3	3	2	4	3	2	3	1	2	3	2	2	3	3	2	4	3	2	3	1	2	3	2	2	3	3	2	4	3
sp|P00973-2|OAS1_HUMAN	P00973-2	OAS1_HUMAN	OAS1	364	Homo sapiens		Isoform p42 of 2'-5'-oligoadenylate synthase 1	1	0.9987	2	2	0	2	0	1	1	0	0	0	0	0	0	0	0	0	0	0	0	0	0	0	0	0	0	0	0	0	0	1	1	0	0	0	0	0	0	0	0	0
sp|P01009|A1AT_HUMAN	P01009	A1AT_HUMAN	SERPINA1	418	Homo sapiens	1:Experimental evidence at protein level	Alpha-1-antitrypsin	1	0.999	6	19	1	19	0	2	1	2	1	0	0	3	1	2	3	4	0	0	0	0	0	0	0	0	0	1	0	0	0	2	1	2	1	0	0	3	1	2	3	4
sp|P01033|TIMP1_HUMAN	P01033	TIMP1_HUMAN	TIMP1	207	Homo sapiens	1:Experimental evidence at protein level	Metalloproteinase inhibitor 1	1	0.999	2	20	20	20	3	1	0	1	2	6	1	1	0	1	2	2	3	1	0	1	2	6	1	1	0	1	2	2	3	1	0	1	2	6	1	1	0	1	2	2
sp|P01034|CYTC_HUMAN	P01034	CYTC_HUMAN	CST3	146	Homo sapiens	1:Experimental evidence at protein level	Cystatin-C	1	0.999	4	42	42	42	8	6	5	5	3	5	1	1	2	1	2	3	8	6	5	5	3	5	1	1	2	1	2	3	8	6	5	5	3	5	1	1	2	1	2	3
sp|P01116-2|RASK_HUMAN	P01116-2	RASK_HUMAN	KRAS	188	Homo sapiens		Isoform 2B of GTPase KRas	1	0.999	3	22	0	22	2	3	1	2	1	1	0	2	4	1	3	2	0	0	0	0	0	0	0	0	0	0	0	0	2	3	1	2	1	1	0	2	4	1	3	2
sp|P01130-2|LDLR_HUMAN	P01130-2	LDLR_HUMAN	LDLR	682	Homo sapiens		Isoform 2 of Low-density lipoprotein receptor	1	0.999	5	12	0	12	4	2	1	1	1	0	0	0	0	1	0	2	0	0	0	0	0	0	0	0	0	0	0	0	4	2	1	1	1	0	0	0	0	1	0	2
sp|P01135-2|TGFA_HUMAN	P01135-2	TGFA_HUMAN	TGFA	159	Homo sapiens		Isoform 2 of Protransforming growth factor alpha	0.9469	0.999	1	2	0	2	0	0	0	0	0	0	0	1	0	0	0	1	0	0	0	0	0	0	0	0	0	0	0	0	0	0	0	0	0	0	0	1	0	0	0	1
sp|P01833|PIGR_HUMAN	P01833	PIGR_HUMAN	PIGR	764	Homo sapiens	1:Experimental evidence at protein level	Polymeric immunoglobulin receptor	1	0.999	4	9	9	9	1	1	1	3	2	1	0	0	0	0	0	0	1	1	1	3	2	1	0	0	0	0	0	0	1	1	1	3	2	1	0	0	0	0	0	0
sp|P01834|IGKC_HUMAN	P01834	IGKC_HUMAN	IGKC	107	Homo sapiens	1:Experimental evidence at protein level	Immunoglobulin kappa constant	0.9998	0.999	2	4	1	4	0	4	0	0	0	0	0	0	0	0	0	0	0	1	0	0	0	0	0	0	0	0	0	0	0	4	0	0	0	0	0	0	0	0	0	0
sp|P01857|IGHG1_HUMAN	P01857	IGHG1_HUMAN	IGHG1	330	Homo sapiens	1:Experimental evidence at protein level	Immunoglobulin heavy constant gamma 1	1	0.999	1	2	0	2	0	2	0	0	0	0	0	0	0	0	0	0	0	0	0	0	0	0	0	0	0	0	0	0	0	2	0	0	0	0	0	0	0	0	0	0
sp|P01859|IGHG2_HUMAN	P01859	IGHG2_HUMAN	IGHG2	326	Homo sapiens	1:Experimental evidence at protein level	Immunoglobulin heavy constant gamma 2	0.8045	0.9957	1	2	0	2	0	2	0	0	0	0	0	0	0	0	0	0	0	0	0	0	0	0	0	0	0	0	0	0	0	2	0	0	0	0	0	0	0	0	0	0
sp|P02042|HBD_HUMAN	P02042	HBD_HUMAN	HBD	147	Homo sapiens	1:Experimental evidence at protein level	Hemoglobin subunit delta	0.9462	0.999	1	9	0	9	1	2	0	0	1	0	0	2	1	1	1	0	0	0	0	0	0	0	0	0	0	0	0	0	1	2	0	0	1	0	0	2	1	1	1	0
sp|P02462|CO4A1_HUMAN	P02462	CO4A1_HUMAN	COL4A1	1669	Homo sapiens	1:Experimental evidence at protein level	Collagen alpha-1(IV) chain	1	0.999	3	21	1	21	1	3	1	1	1	3	2	3	1	1	2	2	0	0	0	0	0	1	0	0	0	0	0	0	1	3	1	1	1	3	2	3	1	1	2	2
sp|P02538|K2C6A_HUMAN	P02538	K2C6A_HUMAN	KRT6A	564	Homo sapiens	1:Experimental evidence at protein level	Keratin, type II cytoskeletal 6A	1	0.999	11	10	0	174	0	0	0	0	0	0	0	1	2	3	1	3	0	0	0	0	0	0	0	0	0	0	0	0	23	17	17	16	24	9	11	12	12	13	10	10
sp|P02545-2|LMNA_HUMAN	P02545-2	LMNA_HUMAN	LMNA	572	Homo sapiens		Isoform C of Prelamin-A/C	1	0.999	38	40	40	1297	1	1	7	9	2	4	1	5	1	4	3	2	1	1	7	9	2	4	1	5	1	4	3	2	89	81	87	86	134	122	101	110	108	135	123	121
sp|P02545|LMNA_HUMAN	P02545	LMNA_HUMAN	LMNA	664	Homo sapiens	1:Experimental evidence at protein level	Prelamin-A/C	1	0.999	41	1379	0	1398	107	92	91	82	149	130	106	114	113	139	127	129	0	0	0	0	0	0	0	0	0	0	0	0	108	94	92	83	152	131	107	116	115	140	129	131
sp|P02675|FIBB_HUMAN	P02675	FIBB_HUMAN	FGB	491	Homo sapiens	1:Experimental evidence at protein level	Fibrinogen beta chain	1	0.999	2	7	7	7	0	0	0	0	0	1	5	1	0	0	0	0	0	0	0	0	0	1	5	1	0	0	0	0	0	0	0	0	0	1	5	1	0	0	0	0
sp|P02686-2|MBP_HUMAN	P02686-2	MBP_HUMAN	MBP	197	Homo sapiens		Isoform 2 of Myelin basic protein	0.9998	0.9958	2	3	0	3	1	0	1	0	1	0	0	0	0	0	0	0	0	0	0	0	0	0	0	0	0	0	0	0	1	0	1	0	1	0	0	0	0	0	0	0
sp|P02750|A2GL_HUMAN	P02750	A2GL_HUMAN	LRG1	347	Homo sapiens	1:Experimental evidence at protein level	Leucine-rich alpha-2-glycoprotein	0.851	0.9969	1	3	3	3	0	0	1	2	0	0	0	0	0	0	0	0	0	0	1	2	0	0	0	0	0	0	0	0	0	0	1	2	0	0	0	0	0	0	0	0
sp|P02768|ALBU_HUMAN	P02768	ALBU_HUMAN	ALB	609	Homo sapiens	1:Experimental evidence at protein level	Albumin	1	0.999	16	24	24	99	1	23	0	0	0	0	0	0	0	0	0	0	1	23	0	0	0	0	0	0	0	0	0	0	11	30	2	3	7	6	10	7	6	6	5	6
sp|P02769|ALBU_BOVIN	P02769	ALBU_BOVIN	ALB	607	Bos taurus	1:Experimental evidence at protein level	Albumin	1	0.999	44	2131	2056	2131	208	198	118	112	173	161	266	183	180	173	186	173	198	191	116	109	166	155	256	176	174	167	181	167	208	198	118	112	173	161	266	183	180	173	186	173
sp|P02786|TFR1_HUMAN	P02786	TFR1_HUMAN	TFRC	760	Homo sapiens	1:Experimental evidence at protein level	Transferrin receptor protein 1	1	0.9989	2	2	2	2	0	0	1	0	1	0	0	0	0	0	0	0	0	0	1	0	1	0	0	0	0	0	0	0	0	0	1	0	1	0	0	0	0	0	0	0
sp|P02787|TRFE_HUMAN	P02787	TRFE_HUMAN	TF	698	Homo sapiens	1:Experimental evidence at protein level	Serotransferrin	1	0.999	13	87	87	87	13	7	6	8	10	6	5	7	8	6	7	4	13	7	6	8	10	6	5	7	8	6	7	4	13	7	6	8	10	6	5	7	8	6	7	4
sp|P02790|HEMO_HUMAN	P02790	HEMO_HUMAN	HPX	462	Homo sapiens	1:Experimental evidence at protein level	Hemopexin	1	0.999	4	18	18	18	1	1	2	3	0	1	1	2	4	2	1	0	1	1	2	3	0	1	1	2	4	2	1	0	1	1	2	3	0	1	1	2	4	2	1	0
sp|P02794|FRIH_HUMAN	P02794	FRIH_HUMAN	FTH1	183	Homo sapiens	1:Experimental evidence at protein level	Ferritin heavy chain	0.9999	0.9987	1	3	3	3	0	0	1	1	0	0	0	0	0	1	0	0	0	0	1	1	0	0	0	0	0	1	0	0	0	0	1	1	0	0	0	0	0	1	0	0
sp|P02795|MT2_HUMAN	P02795	MT2_HUMAN	MT2A	61	Homo sapiens	1:Experimental evidence at protein level	Metallothionein-2	0.9469	0.999	1	5	0	5	0	0	0	0	0	0	1	0	1	1	1	1	0	0	0	0	0	0	0	0	0	0	0	0	0	0	0	0	0	0	1	0	1	1	1	1
sp|P03886|NU1M_HUMAN	P03886	NU1M_HUMAN	MT-ND1	318	Homo sapiens	1:Experimental evidence at protein level	NADH-ubiquinone oxidoreductase chain 1	0.9469	0.999	1	15	15	15	0	1	0	0	4	2	2	1	0	2	0	3	0	1	0	0	4	2	2	1	0	2	0	3	0	1	0	0	4	2	2	1	0	2	0	3
sp|P03905|NU4M_HUMAN	P03905	NU4M_HUMAN	MT-ND4	459	Homo sapiens	1:Experimental evidence at protein level	NADH-ubiquinone oxidoreductase chain 4	1	0.999	2	16	16	16	1	2	0	0	3	2	1	1	1	2	1	2	1	2	0	0	3	2	1	1	1	2	1	2	1	2	0	0	3	2	1	1	1	2	1	2
sp|P03915|NU5M_HUMAN	P03915	NU5M_HUMAN	MT-ND5	603	Homo sapiens	1:Experimental evidence at protein level	NADH-ubiquinone oxidoreductase chain 5	0.9469	0.999	1	15	15	15	1	1	1	3	1	2	0	1	1	2	1	1	1	1	1	3	1	2	0	1	1	2	1	1	1	1	1	3	1	2	0	1	1	2	1	1
sp|P03928|ATP8_HUMAN	P03928	ATP8_HUMAN	MT-ATP8	68	Homo sapiens	1:Experimental evidence at protein level	ATP synthase protein 8	1	0.999	2	26	26	26	2	2	5	2	1	1	2	1	2	3	4	1	2	2	5	2	1	1	2	1	2	3	4	1	2	2	5	2	1	1	2	1	2	3	4	1
sp|P03973|SLPI_HUMAN	P03973	SLPI_HUMAN	SLPI	132	Homo sapiens	1:Experimental evidence at protein level	Antileukoproteinase	0.9425	0.9989	1	4	4	4	0	0	3	1	0	0	0	0	0	0	0	0	0	0	3	1	0	0	0	0	0	0	0	0	0	0	3	1	0	0	0	0	0	0	0	0
sp|P04040|CATA_HUMAN	P04040	CATA_HUMAN	CAT	527	Homo sapiens	1:Experimental evidence at protein level	Catalase	1	0.999	10	119	119	119	8	10	8	10	9	17	7	9	7	9	13	12	8	10	8	10	9	17	7	9	7	9	13	12	8	10	8	10	9	17	7	9	7	9	13	12
sp|P04062-2|GBA1_HUMAN	P04062-2	GBA1_HUMAN	GBA1	516	Homo sapiens		Isoform Short of Lysosomal acid glucosylceramidase	0.939	0.9988	1	1	0	1	0	0	0	0	1	0	0	0	0	0	0	0	0	0	0	0	0	0	0	0	0	0	0	0	0	0	0	0	1	0	0	0	0	0	0	0
sp|P04066|FUCO_HUMAN	P04066	FUCO_HUMAN	FUCA1	466	Homo sapiens	1:Experimental evidence at protein level	Tissue alpha-L-fucosidase	1	0.999	4	30	30	30	4	4	0	0	6	4	4	1	2	1	2	2	4	4	0	0	6	4	4	1	2	1	2	2	4	4	0	0	6	4	4	1	2	1	2	2
sp|P04075|ALDOA_HUMAN	P04075	ALDOA_HUMAN	ALDOA	364	Homo sapiens	1:Experimental evidence at protein level	Fructose-bisphosphate aldolase A	1	0.999	23	1338	21	1338	144	150	134	132	146	133	76	60	92	74	91	106	3	3	0	0	5	1	1	0	1	3	1	3	144	150	134	132	146	133	76	60	92	74	91	106
sp|P04080|CYTB_HUMAN	P04080	CYTB_HUMAN	CSTB	98	Homo sapiens	1:Experimental evidence at protein level	Cystatin-B	1	0.999	6	350	350	350	29	29	20	13	37	43	25	22	35	32	33	32	29	29	20	13	37	43	25	22	35	32	33	32	29	29	20	13	37	43	25	22	35	32	33	32
sp|P04083|ANXA1_HUMAN	P04083	ANXA1_HUMAN	ANXA1	346	Homo sapiens	1:Experimental evidence at protein level	Annexin A1	1	0.999	14	309	309	309	27	26	15	10	25	21	28	30	27	36	34	30	27	26	15	10	25	21	28	30	27	36	34	30	27	26	15	10	25	21	28	30	27	36	34	30
sp|P04155|TFF1_HUMAN	P04155	TFF1_HUMAN	TFF1	84	Homo sapiens	1:Experimental evidence at protein level	Trefoil factor 1	0.9469	0.999	1	4	4	4	1	1	0	0	1	1	0	0	0	0	0	0	1	1	0	0	1	1	0	0	0	0	0	0	1	1	0	0	1	1	0	0	0	0	0	0
sp|P04156|PRIO_HUMAN	P04156	PRIO_HUMAN	PRNP	253	Homo sapiens	1:Experimental evidence at protein level	Major prion protein	1	0.999	1	20	20	20	0	3	0	0	1	1	0	4	3	3	2	3	0	3	0	0	1	1	0	4	3	3	2	3	0	3	0	0	1	1	0	4	3	3	2	3
sp|P04179-2|SODM_HUMAN	P04179-2	SODM_HUMAN	SOD2	183	Homo sapiens		Isoform 2 of Superoxide dismutase [Mn], mitochondrial	1	0.999	4	45	0	45	2	5	4	4	7	6	2	3	3	3	2	4	0	0	0	0	0	0	0	0	0	0	0	0	2	5	4	4	7	6	2	3	3	3	2	4
sp|P04181|OAT_HUMAN	P04181	OAT_HUMAN	OAT	439	Homo sapiens	1:Experimental evidence at protein level	Ornithine aminotransferase, mitochondrial	1	0.999	10	68	30	68	5	8	6	4	9	5	3	4	5	3	9	7	4	6	3	3	2	1	1	1	3	1	2	3	5	8	6	4	9	5	3	4	5	3	9	7
sp|P04264|K2C1_HUMAN	P04264	K2C1_HUMAN	KRT1	644	Homo sapiens	1:Experimental evidence at protein level	Keratin, type II cytoskeletal 1	1	0.999	12	19	19	173	3	5	0	0	4	2	0	0	0	0	2	3	3	5	0	0	4	2	0	0	0	0	2	3	24	21	17	16	22	11	11	10	10	9	11	11
sp|P04350|TBB4A_HUMAN	P04350	TBB4A_HUMAN	TUBB4A	444	Homo sapiens	1:Experimental evidence at protein level	Tubulin beta-4A chain	1	0.999	16	144	5	456	18	19	7	3	12	7	7	9	17	14	17	14	0	0	0	0	3	1	0	0	0	0	1	0	45	41	35	23	47	37	45	26	46	32	41	38
sp|P04406-2|G3P_HUMAN	P04406-2	G3P_HUMAN	GAPDH	293	Homo sapiens		Isoform 2 of Glyceraldehyde-3-phosphate dehydrogenase	0.9999	0.999	15	3	3	4788	2	1	0	0	0	0	0	0	0	0	0	0	2	1	0	0	0	0	0	0	0	0	0	0	403	437	433	263	499	449	388	341	394	371	396	414
sp|P04406|G3P_HUMAN	P04406	G3P_HUMAN	GAPDH	335	Homo sapiens	1:Experimental evidence at protein level	Glyceraldehyde-3-phosphate dehydrogenase	1	0.999	16	4864	79	4864	401	436	495	274	500	450	388	342	396	371	396	415	0	0	62	11	1	1	0	1	2	0	0	1	401	436	495	274	500	450	388	342	396	371	396	415
sp|P04424-2|ARLY_HUMAN	P04424-2	ARLY_HUMAN	ASL	444	Homo sapiens		Isoform 2 of Argininosuccinate lyase	1	0.999	4	24	0	24	3	5	3	5	5	3	0	0	0	0	0	0	0	0	0	0	0	0	0	0	0	0	0	0	3	5	3	5	5	3	0	0	0	0	0	0
sp|P04439|HLAA_HUMAN	P04439	HLAA_HUMAN	HLA-A	365	Homo sapiens	1:Experimental evidence at protein level	HLA class I histocompatibility antigen, A alpha chain	1	0.999	4	55	10	55	4	1	3	4	2	3	0	4	7	9	10	8	0	0	0	1	0	1	0	1	2	2	2	1	4	1	3	4	2	3	0	4	7	9	10	8
sp|P04626-4|ERBB2_HUMAN	P04626-4	ERBB2_HUMAN	ERBB2	1240	Homo sapiens		Isoform 4 of Receptor tyrosine-protein kinase erbB-2	0.9983	0.999	2	10	0	10	0	2	0	0	1	2	1	0	0	1	2	1	0	0	0	0	0	0	0	0	0	0	0	0	0	2	0	0	1	2	1	0	0	1	2	1
sp|P04632|CPNS1_HUMAN	P04632	CPNS1_HUMAN	CAPNS1	268	Homo sapiens	1:Experimental evidence at protein level	Calpain small subunit 1	1	0.999	4	95	95	95	7	6	5	4	19	19	5	5	8	4	8	5	7	6	5	4	19	19	5	5	8	4	8	5	7	6	5	4	19	19	5	5	8	4	8	5
sp|P04792|HSPB1_HUMAN	P04792	HSPB1_HUMAN	HSPB1	205	Homo sapiens	1:Experimental evidence at protein level	Heat shock protein beta-1	0.9468	0.999	1	5	5	5	0	0	1	2	2	0	0	0	0	0	0	0	0	0	1	2	2	0	0	0	0	0	0	0	0	0	1	2	2	0	0	0	0	0	0	0
sp|P04843|RPN1_HUMAN	P04843	RPN1_HUMAN	RPN1	607	Homo sapiens	1:Experimental evidence at protein level	Dolichyl-diphosphooligosaccharide--protein glycosyltransferase subunit 1	1	0.999	16	186	186	186	15	14	11	9	19	16	18	13	15	18	21	17	15	14	11	9	19	16	18	13	15	18	21	17	15	14	11	9	19	16	18	13	15	18	21	17
sp|P04844-2|RPN2_HUMAN	P04844-2	RPN2_HUMAN	RPN2	615	Homo sapiens		Isoform 2 of Dolichyl-diphosphooligosaccharide--protein glycosyltransferase subunit 2	1	0.999	12	292	0	292	18	15	22	21	27	25	18	28	31	31	28	28	0	0	0	0	0	0	0	0	0	0	0	0	18	15	22	21	27	25	18	28	31	31	28	28
sp|P04899-2|GNAI2_HUMAN	P04899-2	GNAI2_HUMAN	GNAI2	339	Homo sapiens		Isoform 2 of Guanine nucleotide-binding protein G(i) subunit alpha-2	0	0.999	4	25	0	46	1	2	1	1	2	1	4	2	3	4	2	2	0	0	0	0	0	0	0	0	0	0	0	0	2	3	2	2	4	3	6	4	4	7	4	5
sp|P04899-4|GNAI2_HUMAN	P04899-4	GNAI2_HUMAN	GNAI2	366	Homo sapiens		Isoform sGi2 of Guanine nucleotide-binding protein G(i) subunit alpha-2	1	0.999	5	23	0	48	1	1	2	2	2	2	2	2	1	3	2	3	0	0	0	0	0	0	0	0	0	0	0	0	2	3	3	3	4	3	6	4	4	7	4	5
sp|P05023-4|AT1A1_HUMAN	P05023-4	AT1A1_HUMAN	ATP1A1	1023	Homo sapiens		Isoform 4 of Sodium/potassium-transporting ATPase subunit alpha-1	1	0.999	25	265	0	265	33	32	12	15	37	23	16	23	18	16	19	21	0	0	0	0	0	0	0	0	0	0	0	0	33	32	12	15	37	23	16	23	18	16	19	21
sp|P05026-2|AT1B1_HUMAN	P05026-2	AT1B1_HUMAN	ATP1B1	301	Homo sapiens		Isoform 2 of Sodium/potassium-transporting ATPase subunit beta-1	1	0.999	5	37	0	37	4	7	5	3	3	3	1	2	2	2	2	3	0	0	0	0	0	0	0	0	0	0	0	0	4	7	5	3	3	3	1	2	2	2	2	3
sp|P05062|ALDOB_HUMAN	P05062	ALDOB_HUMAN	ALDOB	364	Homo sapiens	1:Experimental evidence at protein level	Fructose-bisphosphate aldolase B	0.6351	0.9898	1	1	1	1	0	0	0	1	0	0	0	0	0	0	0	0	0	0	0	1	0	0	0	0	0	0	0	0	0	0	0	1	0	0	0	0	0	0	0	0
sp|P05067-11|A4_HUMAN	P05067-11	A4_HUMAN	APP	746	Homo sapiens		Isoform 11 of Amyloid-beta precursor protein	1	0.999	11	41	0	41	3	5	3	3	4	2	3	1	2	5	6	4	0	0	0	0	0	0	0	0	0	0	0	0	3	5	3	3	4	2	3	1	2	5	6	4
sp|P05091|ALDH2_HUMAN	P05091	ALDH2_HUMAN	ALDH2	517	Homo sapiens	1:Experimental evidence at protein level	Aldehyde dehydrogenase, mitochondrial	1	0.999	15	769	110	769	89	90	12	23	89	92	57	49	59	72	74	63	7	11	4	13	11	22	12	6	5	8	4	7	89	90	12	23	89	92	57	49	59	72	74	63
sp|P05114|HMGN1_HUMAN	P05114	HMGN1_HUMAN	HMGN1	100	Homo sapiens	1:Experimental evidence at protein level	Non-histone chromosomal protein HMG-14	1	0.999	10	145	145	145	14	17	8	15	15	13	7	14	7	9	13	13	14	17	8	15	15	13	7	14	7	9	13	13	14	17	8	15	15	13	7	14	7	9	13	13
sp|P05141|ADT2_HUMAN	P05141	ADT2_HUMAN	SLC25A5	298	Homo sapiens	1:Experimental evidence at protein level	ADP/ATP translocase 2	1	0.999	6	191	54	191	19	15	39	29	18	14	8	8	9	8	13	11	8	6	4	3	6	4	2	3	5	3	6	4	19	15	39	29	18	14	8	8	9	8	13	11
sp|P05165-2|PCCA_HUMAN	P05165-2	PCCA_HUMAN	PCCA	702	Homo sapiens		Isoform 2 of Propionyl-CoA carboxylase alpha chain, mitochondrial	1	0.999	5	18	0	18	2	2	4	3	4	1	0	0	0	1	1	0	0	0	0	0	0	0	0	0	0	0	0	0	2	2	4	3	4	1	0	0	0	1	1	0
sp|P05166-2|PCCB_HUMAN	P05166-2	PCCB_HUMAN	PCCB	559	Homo sapiens		Isoform 2 of Propionyl-CoA carboxylase beta chain, mitochondrial	1	0.999	5	35	0	35	2	3	2	4	3	3	2	1	4	3	4	4	0	0	0	0	0	0	0	0	0	0	0	0	2	3	2	4	3	3	2	1	4	3	4	4
sp|P05198|IF2A_HUMAN	P05198	IF2A_HUMAN	EIF2S1	315	Homo sapiens	1:Experimental evidence at protein level	Eukaryotic translation initiation factor 2 subunit 1	1	0.999	8	78	78	78	6	6	5	3	12	11	8	3	5	7	6	6	6	6	5	3	12	11	8	3	5	7	6	6	6	6	5	3	12	11	8	3	5	7	6	6
sp|P05204|HMGN2_HUMAN	P05204	HMGN2_HUMAN	HMGN2	90	Homo sapiens	1:Experimental evidence at protein level	Non-histone chromosomal protein HMG-17	1	0.999	7	190	76	190	19	17	11	7	16	29	11	12	13	16	16	23	8	7	4	2	9	7	7	5	6	7	6	8	19	17	11	7	16	29	11	12	13	16	16	23
sp|P05386|RLA1_HUMAN	P05386	RLA1_HUMAN	RPLP1	114	Homo sapiens	1:Experimental evidence at protein level	60S acidic ribosomal protein P1	1	0.999	3	32	32	32	1	1	16	13	0	0	0	1	0	0	0	0	1	1	16	13	0	0	0	1	0	0	0	0	1	1	16	13	0	0	0	1	0	0	0	0
sp|P05387|RLA2_HUMAN	P05387	RLA2_HUMAN	RPLP2	115	Homo sapiens	1:Experimental evidence at protein level	60S acidic ribosomal protein P2	1	0.999	6	374	374	374	26	29	24	25	30	29	37	35	27	35	40	37	26	29	24	25	30	29	37	35	27	35	40	37	26	29	24	25	30	29	37	35	27	35	40	37
sp|P05388|RLA0_HUMAN	P05388	RLA0_HUMAN	RPLP0	317	Homo sapiens	1:Experimental evidence at protein level	60S acidic ribosomal protein P0	1	0.999	8	633	0	633	39	40	2	2	46	44	83	34	76	87	93	87	0	0	0	0	0	0	0	0	0	0	0	0	39	40	2	2	46	44	83	34	76	87	93	87
sp|P05455|LA_HUMAN	P05455	LA_HUMAN	SSB	408	Homo sapiens	1:Experimental evidence at protein level	Lupus La protein	1	0.999	24	340	340	340	20	26	24	17	31	32	35	24	30	34	41	26	20	26	24	17	31	32	35	24	30	34	41	26	20	26	24	17	31	32	35	24	30	34	41	26
sp|P05556-2|ITB1_HUMAN	P05556-2	ITB1_HUMAN	ITGB1	789	Homo sapiens		Isoform 2 of Integrin beta-1	1	0.999	12	153	0	153	12	14	10	11	20	21	9	10	9	12	12	13	0	0	0	0	0	0	0	0	0	0	0	0	12	14	10	11	20	21	9	10	9	12	12	13
sp|P05771-2|KPCB_HUMAN	P05771-2	KPCB_HUMAN	PRKCB	673	Homo sapiens		Isoform Beta-II of Protein kinase C beta type	0.999	0.999	3	8	0	8	0	1	0	0	1	0	0	0	1	1	3	1	0	0	0	0	0	0	0	0	0	0	0	0	0	1	0	0	1	0	0	0	1	1	3	1
sp|P05783|K1C18_HUMAN	P05783	K1C18_HUMAN	KRT18	430	Homo sapiens	1:Experimental evidence at protein level	Keratin, type I cytoskeletal 18	1	0.999	38	5942	5881	5942	691	679	431	203	616	498	308	366	612	478	529	531	690	673	424	203	607	494	308	361	602	469	525	525	691	679	431	203	616	498	308	366	612	478	529	531
sp|P05787-2|K2C8_HUMAN	P05787-2	K2C8_HUMAN	KRT8	511	Homo sapiens		Isoform 2 of Keratin, type II cytoskeletal 8	1	0.999	41	6388	0	6388	657	638	505	261	880	559	316	533	539	514	486	500	0	0	0	0	0	0	0	0	0	0	0	0	657	638	505	261	880	559	316	533	539	514	486	500
sp|P06213-2|INSR_HUMAN	P06213-2	INSR_HUMAN	INSR	1370	Homo sapiens		Isoform Short of Insulin receptor	0.9363	0.9988	1	2	0	2	1	1	0	0	0	0	0	0	0	0	0	0	0	0	0	0	0	0	0	0	0	0	0	0	1	1	0	0	0	0	0	0	0	0	0	0
sp|P06239-3|LCK_HUMAN	P06239-3	LCK_HUMAN	LCK	539	Homo sapiens		Isoform 3 of Tyrosine-protein kinase Lck	1	0.9989	3	5	0	5	0	0	0	0	0	0	0	1	2	1	0	1	0	0	0	0	0	0	0	0	0	0	0	0	0	0	0	0	0	0	0	1	2	1	0	1
sp|P06280|AGAL_HUMAN	P06280	AGAL_HUMAN	GLA	429	Homo sapiens	1:Experimental evidence at protein level	Alpha-galactosidase A	1	0.999	2	4	4	4	0	0	0	0	0	0	2	1	1	0	0	0	0	0	0	0	0	0	2	1	1	0	0	0	0	0	0	0	0	0	2	1	1	0	0	0
sp|P06396|GELS_HUMAN	P06396	GELS_HUMAN	GSN	782	Homo sapiens	1:Experimental evidence at protein level	Gelsolin	1	0.999	20	210	210	210	15	20	13	9	31	16	17	17	18	15	15	24	15	20	13	9	31	16	17	17	18	15	15	24	15	20	13	9	31	16	17	17	18	15	15	24
sp|P06454-2|PTMA_HUMAN	P06454-2	PTMA_HUMAN	PTMA	110	Homo sapiens		Isoform 2 of Prothymosin alpha	1	0.999	8	293	0	293	12	17	16	11	18	14	36	36	30	36	34	33	0	0	0	0	0	0	0	0	0	0	0	0	12	17	16	11	18	14	36	36	30	36	34	33
sp|P06493|CDK1_HUMAN	P06493	CDK1_HUMAN	CDK1	297	Homo sapiens	1:Experimental evidence at protein level	Cyclin-dependent kinase 1	0.8702	0.9973	1	1	1	1	0	0	0	0	0	0	0	0	1	0	0	0	0	0	0	0	0	0	0	0	1	0	0	0	0	0	0	0	0	0	0	0	1	0	0	0
sp|P06576|ATPB_HUMAN	P06576	ATPB_HUMAN	ATP5F1B	529	Homo sapiens	1:Experimental evidence at protein level	ATP synthase subunit beta, mitochondrial	1	0.999	15	1046	1046	1046	80	82	127	103	88	88	81	83	68	87	80	79	80	82	127	103	88	88	81	83	68	87	80	79	80	82	127	103	88	88	81	83	68	87	80	79
sp|P06703|S10A6_HUMAN	P06703	S10A6_HUMAN	S100A6	90	Homo sapiens	1:Experimental evidence at protein level	Protein S100-A6	1	0.999	15	1046	1046	1046	39	239	140	29	228	174	40	34	39	26	30	28	39	239	140	29	228	174	40	34	39	26	30	28	39	239	140	29	228	174	40	34	39	26	30	28
sp|P06730-2|IF4E_HUMAN	P06730-2	IF4E_HUMAN	EIF4E	248	Homo sapiens		Isoform 2 of Eukaryotic translation initiation factor 4E	1	0.999	4	59	0	59	6	3	5	7	4	9	4	4	4	5	3	5	0	0	0	0	0	0	0	0	0	0	0	0	6	3	5	7	4	9	4	4	4	5	3	5
sp|P06731-2|CEAM5_HUMAN	P06731-2	CEAM5_HUMAN	CEACAM5	701	Homo sapiens		Isoform 2 of Carcinoembryonic antigen-related cell adhesion molecule 5	1	0.999	5	29	0	29	4	5	5	4	5	2	0	0	1	0	2	1	0	0	0	0	0	0	0	0	0	0	0	0	4	5	5	4	5	2	0	0	1	0	2	1
sp|P06733|ENOA_HUMAN	P06733	ENOA_HUMAN	ENO1	434	Homo sapiens	1:Experimental evidence at protein level	Alpha-enolase	1	0.999	20	939	112	939	86	99	60	45	78	82	75	58	79	81	96	100	8	8	5	7	11	10	13	9	11	7	10	13	86	99	60	45	78	82	75	58	79	81	96	100
sp|P06737-2|PYGL_HUMAN	P06737-2	PYGL_HUMAN	PYGL	813	Homo sapiens		Isoform 2 of Glycogen phosphorylase, liver form	1	0.999	26	298	0	344	21	24	15	14	23	19	26	27	29	23	37	40	0	0	0	0	0	0	0	0	0	0	0	0	29	29	17	18	29	23	29	29	34	25	38	44
sp|P06744|G6PI_HUMAN	P06744	G6PI_HUMAN	GPI	558	Homo sapiens	1:Experimental evidence at protein level	Glucose-6-phosphate isomerase	1	0.999	21	541	1	541	47	53	29	23	49	68	55	30	46	44	48	49	0	1	0	0	0	0	0	0	0	0	0	0	47	53	29	23	49	68	55	30	46	44	48	49
sp|P06748|NPM_HUMAN	P06748	NPM_HUMAN	NPM1	294	Homo sapiens	1:Experimental evidence at protein level	Nucleophosmin	1	0.999	16	875	0	875	63	59	32	28	88	66	92	75	97	93	91	91	0	0	0	0	0	0	0	0	0	0	0	0	63	59	32	28	88	66	92	75	97	93	91	91
sp|P06753-2|TPM3_HUMAN	P06753-2	TPM3_HUMAN	TPM3	248	Homo sapiens		Isoform 2 of Tropomyosin alpha-3 chain	1	0.999	26	470	0	470	46	46	38	28	47	50	28	31	37	38	44	37	0	0	0	0	0	0	0	0	0	0	0	0	46	46	38	28	47	50	28	31	37	38	44	37
sp|P06756-2|ITAV_HUMAN	P06756-2	ITAV_HUMAN	ITGAV	1012	Homo sapiens		Isoform 2 of Integrin alpha-V	1	0.999	6	36	0	36	2	3	4	3	5	3	2	3	3	4	2	2	0	0	0	0	0	0	0	0	0	0	0	0	2	3	4	3	5	3	2	3	3	4	2	2
sp|P06865|HEXA_HUMAN	P06865	HEXA_HUMAN	HEXA	529	Homo sapiens	1:Experimental evidence at protein level	Beta-hexosaminidase subunit alpha	1	0.999	3	41	3	41	2	4	4	3	2	6	5	2	3	3	4	3	0	0	0	0	0	1	1	0	0	0	1	0	2	4	4	3	2	6	5	2	3	3	4	3
sp|P06899|H2B1J_HUMAN	P06899	H2B1J_HUMAN	H2BC11	126	Homo sapiens	1:Experimental evidence at protein level	Histone H2B type 1-J	0.9879	0.999	7	26	0	989	3	1	2	1	1	3	1	3	2	3	2	4	0	0	0	0	0	0	0	0	0	0	0	0	81	64	39	21	100	100	65	158	71	73	101	116
sp|P07099|HYEP_HUMAN	P07099	HYEP_HUMAN	EPHX1	455	Homo sapiens	1:Experimental evidence at protein level	Epoxide hydrolase 1	1	0.999	6	49	49	49	2	8	2	1	4	5	0	2	6	7	7	5	2	8	2	1	4	5	0	2	6	7	7	5	2	8	2	1	4	5	0	2	6	7	7	5
sp|P07108-2|ACBP_HUMAN	P07108-2	ACBP_HUMAN	DBI	104	Homo sapiens		Isoform 2 of Acyl-CoA-binding protein	1	0.999	7	562	0	562	54	43	43	50	56	43	41	43	52	40	49	48	0	0	0	0	0	0	0	0	0	0	0	0	54	43	43	50	56	43	41	43	52	40	49	48
sp|P07148|FABPL_HUMAN	P07148	FABPL_HUMAN	FABP1	127	Homo sapiens	1:Experimental evidence at protein level	Fatty acid-binding protein, liver	1	0.999	5	40	26	40	10	14	2	2	6	6	0	0	0	0	0	0	7	7	2	2	4	4	0	0	0	0	0	0	10	14	2	2	6	6	0	0	0	0	0	0
sp|P07195|LDHB_HUMAN	P07195	LDHB_HUMAN	LDHB	334	Homo sapiens	1:Experimental evidence at protein level	L-lactate dehydrogenase B chain	1	0.999	16	1044	1018	1044	109	80	80	76	94	84	97	86	89	83	90	76	105	77	80	76	89	83	96	84	88	78	87	75	109	80	80	76	94	84	97	86	89	83	90	76
sp|P07203|GPX1_HUMAN	P07203	GPX1_HUMAN	GPX1	203	Homo sapiens	1:Experimental evidence at protein level	Glutathione peroxidase 1	1	0.999	8	102	84	102	9	13	6	6	12	7	6	7	10	7	10	9	7	11	5	5	11	6	5	5	8	6	8	7	9	13	6	6	12	7	6	7	10	7	10	9
sp|P07204|TRBM_HUMAN	P07204	TRBM_HUMAN	THBD	575	Homo sapiens	1:Experimental evidence at protein level	Thrombomodulin	0.9959	0.9895	2	3	3	3	0	1	0	0	0	0	1	0	0	0	0	1	0	1	0	0	0	0	1	0	0	0	0	1	0	1	0	0	0	0	1	0	0	0	0	1
sp|P07225|PROS_HUMAN	P07225	PROS_HUMAN	PROS1	676	Homo sapiens	1:Experimental evidence at protein level	Vitamin K-dependent protein S	1	0.999	3	4	4	4	0	0	0	0	0	0	1	1	0	0	0	2	0	0	0	0	0	0	1	1	0	0	0	2	0	0	0	0	0	0	1	1	0	0	0	2
sp|P07237|PDIA1_HUMAN	P07237	PDIA1_HUMAN	P4HB	508	Homo sapiens	1:Experimental evidence at protein level	Protein disulfide-isomerase	1	0.999	26	661	661	661	51	55	38	41	70	65	54	59	63	54	53	58	51	55	38	41	70	65	54	59	63	54	53	58	51	55	38	41	70	65	54	59	63	54	53	58
sp|P07305|H10_HUMAN	P07305	H10_HUMAN	H1-0	194	Homo sapiens	1:Experimental evidence at protein level	Histone H1.0	1	0.999	6	111	99	111	14	15	12	10	13	13	3	6	6	4	7	8	11	12	12	9	10	12	3	6	6	4	7	7	14	15	12	10	13	13	3	6	6	4	7	8
sp|P07311|ACYP1_HUMAN	P07311	ACYP1_HUMAN	ACYP1	99	Homo sapiens	1:Experimental evidence at protein level	Acylphosphatase-1	0.9994	0.999	1	13	13	13	1	1	1	2	1	1	0	1	1	2	1	1	1	1	1	2	1	1	0	1	1	2	1	1	1	1	1	2	1	1	0	1	1	2	1	1
sp|P07339|CATD_HUMAN	P07339	CATD_HUMAN	CTSD	412	Homo sapiens	1:Experimental evidence at protein level	Cathepsin D	1	0.999	9	150	150	150	16	24	7	6	13	12	11	5	15	7	18	16	16	24	7	6	13	12	11	5	15	7	18	16	16	24	7	6	13	12	11	5	15	7	18	16
sp|P07355|ANXA2_HUMAN	P07355	ANXA2_HUMAN	ANXA2	339	Homo sapiens	1:Experimental evidence at protein level	Annexin A2	1	0.999	18	1380	0	1380	98	114	134	106	138	133	79	74	115	117	131	141	0	0	0	0	0	0	0	0	0	0	0	0	98	114	134	106	138	133	79	74	115	117	131	141
sp|P07384|CAN1_HUMAN	P07384	CAN1_HUMAN	CAPN1	714	Homo sapiens	1:Experimental evidence at protein level	Calpain-1 catalytic subunit	1	0.999	14	97	97	97	15	14	4	4	13	8	7	5	5	6	8	8	15	14	4	4	13	8	7	5	5	6	8	8	15	14	4	4	13	8	7	5	5	6	8	8
sp|P07437|TBB5_HUMAN	P07437	TBB5_HUMAN	TUBB	444	Homo sapiens	1:Experimental evidence at protein level	Tubulin beta chain	1	0.999	18	736	136	736	60	59	52	32	82	63	80	47	65	59	59	78	16	10	2	0	6	5	13	12	14	12	19	27	60	59	52	32	82	63	80	47	65	59	59	78
sp|P07478|TRY2_HUMAN	P07478	TRY2_HUMAN	PRSS2	247	Homo sapiens	1:Experimental evidence at protein level	Trypsin-2	0.9968	0.999	2	19	0	19	1	1	0	1	4	3	1	2	1	2	2	1	0	0	0	0	0	0	0	0	0	0	0	0	1	1	0	1	4	3	1	2	1	2	2	1
sp|P07602|SAP_HUMAN	P07602	SAP_HUMAN	PSAP	524	Homo sapiens	1:Experimental evidence at protein level	Prosaposin	1	0.999	11	82	38	82	5	4	16	14	7	7	4	5	4	5	7	4	2	2	3	7	2	3	3	4	3	3	3	3	5	4	16	14	7	7	4	5	4	5	7	4
sp|P07686|HEXB_HUMAN	P07686	HEXB_HUMAN	HEXB	556	Homo sapiens	1:Experimental evidence at protein level	Beta-hexosaminidase subunit beta	1	0.999	7	86	86	86	8	8	3	3	9	10	6	5	8	9	10	7	8	8	3	3	9	10	6	5	8	9	10	7	8	8	3	3	9	10	6	5	8	9	10	7
sp|P07737|PROF1_HUMAN	P07737	PROF1_HUMAN	PFN1	140	Homo sapiens	1:Experimental evidence at protein level	Profilin-1	1	0.999	9	522	522	522	65	63	43	16	41	42	29	30	51	35	54	53	65	63	43	16	41	42	29	30	51	35	54	53	65	63	43	16	41	42	29	30	51	35	54	53
sp|P07741|APT_HUMAN	P07741	APT_HUMAN	APRT	180	Homo sapiens	1:Experimental evidence at protein level	Adenine phosphoribosyltransferase	1	0.999	2	44	28	44	7	5	2	2	5	6	3	2	3	2	4	3	6	3	0	0	4	5	1	1	2	1	3	2	7	5	2	2	5	6	3	2	3	2	4	3
sp|P07814|SYEP_HUMAN	P07814	SYEP_HUMAN	EPRS1	1512	Homo sapiens	1:Experimental evidence at protein level	Bifunctional glutamate/proline--tRNA ligase	1	0.999	36	474	474	474	52	39	15	16	67	47	38	28	38	47	48	39	52	39	15	16	67	47	38	28	38	47	48	39	52	39	15	16	67	47	38	28	38	47	48	39
sp|P07858|CATB_HUMAN	P07858	CATB_HUMAN	CTSB	339	Homo sapiens	1:Experimental evidence at protein level	Cathepsin B	1	0.999	12	316	316	316	16	22	28	19	29	24	29	29	29	32	30	29	16	22	28	19	29	24	29	29	29	32	30	29	16	22	28	19	29	24	29	29	29	32	30	29
sp|P07900-2|HS90A_HUMAN	P07900-2	HS90A_HUMAN	HSP90AA1	854	Homo sapiens		Isoform 2 of Heat shock protein HSP 90-alpha	1	0.999	35	1645	0	1645	137	144	163	162	158	134	109	111	128	113	149	137	0	0	0	0	0	0	0	0	0	0	0	0	137	144	163	162	158	134	109	111	128	113	149	137
sp|P07910-2|HNRPC_HUMAN	P07910-2	HNRPC_HUMAN	HNRNPC	293	Homo sapiens		Isoform C1 of Heterogeneous nuclear ribonucleoproteins C1/C2	1	0.999	14	194	0	194	20	20	16	9	21	13	14	15	14	19	16	17	0	0	0	0	0	0	0	0	0	0	0	0	20	20	16	9	21	13	14	15	14	19	16	17
sp|P07919|QCR6_HUMAN	P07919	QCR6_HUMAN	UQCRH	91	Homo sapiens	1:Experimental evidence at protein level	Cytochrome b-c1 complex subunit 6, mitochondrial	1	0.999	4	89	68	89	6	8	10	13	19	10	3	5	4	5	4	2	4	6	8	11	16	8	2	2	4	3	2	2	6	8	10	13	19	10	3	5	4	5	4	2
sp|P07942|LAMB1_HUMAN	P07942	LAMB1_HUMAN	LAMB1	1786	Homo sapiens	1:Experimental evidence at protein level	Laminin subunit beta-1	1	0.999	38	1753	1753	1753	156	162	99	119	189	152	155	145	154	153	147	122	156	162	99	119	189	152	155	145	154	153	147	122	156	162	99	119	189	152	155	145	154	153	147	122
sp|P07947|YES_HUMAN	P07947	YES_HUMAN	YES1	543	Homo sapiens	1:Experimental evidence at protein level	Tyrosine-protein kinase Yes	0.9981	0.999	2	3	3	4	0	0	1	2	0	0	0	0	0	0	0	0	0	0	1	2	0	0	0	0	0	0	0	0	0	0	1	3	0	0	0	0	0	0	0	0
sp|P07948-2|LYN_HUMAN	P07948-2	LYN_HUMAN	LYN	491	Homo sapiens		Isoform 2 of Tyrosine-protein kinase Lyn	1	0.999	7	33	0	33	3	4	3	4	5	4	0	4	2	2	0	2	0	0	0	0	0	0	0	0	0	0	0	0	3	4	3	4	5	4	0	4	2	2	0	2
sp|P07951-2|TPM2_HUMAN	P07951-2	TPM2_HUMAN	TPM2	284	Homo sapiens		Isoform 2 of Tropomyosin beta chain	1	0.999	13	15	0	150	0	0	0	0	2	1	1	3	1	2	3	2	0	0	0	0	0	0	0	0	0	0	0	0	10	14	11	11	14	12	11	14	13	14	13	13
sp|P07954-2|FUMH_HUMAN	P07954-2	FUMH_HUMAN	FH	467	Homo sapiens		Isoform Cytoplasmic of Fumarate hydratase, mitochondrial	1	0.999	12	220	0	220	20	26	15	12	25	21	12	14	17	15	20	23	0	0	0	0	0	0	0	0	0	0	0	0	20	26	15	12	25	21	12	14	17	15	20	23
sp|P08034|CXB1_HUMAN	P08034	CXB1_HUMAN	GJB1	283	Homo sapiens	1:Experimental evidence at protein level	Gap junction beta-1 protein	0.9465	0.999	1	3	3	3	0	1	0	0	2	0	0	0	0	0	0	0	0	1	0	0	2	0	0	0	0	0	0	0	0	1	0	0	2	0	0	0	0	0	0	0
sp|P08047-3|SP1_HUMAN	P08047-3	SP1_HUMAN	SP1	737	Homo sapiens		Isoform 3 of Transcription factor Sp1	1	0.999	2	17	0	17	1	1	2	1	1	2	1	1	1	2	1	3	0	0	0	0	0	0	0	0	0	0	0	0	1	1	2	1	1	2	1	1	1	2	1	3
sp|P08133|ANXA6_HUMAN	P08133	ANXA6_HUMAN	ANXA6	673	Homo sapiens	1:Experimental evidence at protein level	Annexin A6	1	0.999	18	141	1	141	3	5	5	6	7	7	12	15	19	19	19	24	0	0	0	0	0	0	0	0	1	0	0	0	3	5	5	6	7	7	12	15	19	19	19	24
sp|P08134|RHOC_HUMAN	P08134	RHOC_HUMAN	RHOC	193	Homo sapiens	1:Experimental evidence at protein level	Rho-related GTP-binding protein RhoC	1	0.999	5	3	1	82	0	1	0	0	1	1	0	0	0	0	0	0	0	1	0	0	0	0	0	0	0	0	0	0	9	9	8	3	10	7	4	5	6	5	8	8
sp|P08195-2|4F2_HUMAN	P08195-2	4F2_HUMAN	SLC3A2	529	Homo sapiens		Isoform 2 of 4F2 cell-surface antigen heavy chain	1	0.999	11	125	0	125	7	8	12	6	11	7	10	8	11	16	13	16	0	0	0	0	0	0	0	0	0	0	0	0	7	8	12	6	11	7	10	8	11	16	13	16
sp|P08237|PFKAM_HUMAN	P08237	PFKAM_HUMAN	PFKM	780	Homo sapiens	1:Experimental evidence at protein level	ATP-dependent 6-phosphofructokinase, muscle type	1	0.999	18	248	0	253	19	24	16	17	16	22	27	19	18	24	23	23	0	0	0	0	0	0	0	0	0	0	0	0	20	24	16	17	16	22	27	19	20	25	24	23
sp|P08238|HS90B_HUMAN	P08238	HS90B_HUMAN	HSP90AB1	724	Homo sapiens	1:Experimental evidence at protein level	Heat shock protein HSP 90-beta	1	0.999	37	989	638	1681	95	93	61	60	78	75	85	67	98	81	100	96	65	67	34	42	45	43	61	40	69	49	62	61	144	144	139	136	146	129	124	118	156	132	165	148
sp|P08240|SRPRA_HUMAN	P08240	SRPRA_HUMAN	SRPRA	638	Homo sapiens	1:Experimental evidence at protein level	Signal recognition particle receptor subunit alpha	1	0.999	2	13	11	13	1	3	2	1	1	0	0	1	1	1	1	1	1	2	1	1	1	0	0	1	1	1	1	1	1	3	2	1	1	0	0	1	1	1	1	1
sp|P08243-2|ASNS_HUMAN	P08243-2	ASNS_HUMAN	ASNS	540	Homo sapiens		Isoform 2 of Asparagine synthetase [glutamine-hydrolyzing]	1	0.999	8	99	0	99	6	8	3	4	13	10	10	9	8	10	8	10	0	0	0	0	0	0	0	0	0	0	0	0	6	8	3	4	13	10	10	9	8	10	8	10
sp|P08397-2|HEM3_HUMAN	P08397-2	HEM3_HUMAN	HMBS	344	Homo sapiens		Isoform 2 of Porphobilinogen deaminase	1	0.999	2	15	0	15	2	2	2	1	1	0	0	0	0	1	4	2	0	0	0	0	0	0	0	0	0	0	0	0	2	2	2	1	1	0	0	0	0	1	4	2
sp|P08559-4|ODPA_HUMAN	P08559-4	ODPA_HUMAN	PDHA1	428	Homo sapiens		Isoform 4 of Pyruvate dehydrogenase E1 component subunit alpha, somatic form, mitochondrial	1	0.999	9	64	0	64	9	3	5	7	12	8	1	2	3	3	6	5	0	0	0	0	0	0	0	0	0	0	0	0	9	3	5	7	12	8	1	2	3	3	6	5
sp|P08572|CO4A2_HUMAN	P08572	CO4A2_HUMAN	COL4A2	1712	Homo sapiens	1:Experimental evidence at protein level	Collagen alpha-2(IV) chain	1	0.999	2	35	35	35	2	1	1	4	3	3	1	4	4	5	2	5	2	1	1	4	3	3	1	4	4	5	2	5	2	1	1	4	3	3	1	4	4	5	2	5
sp|P08574|CY1_HUMAN	P08574	CY1_HUMAN	CYC1	325	Homo sapiens	1:Experimental evidence at protein level	Cytochrome c1, heme protein, mitochondrial	1	0.999	4	76	76	76	4	5	6	6	8	6	8	7	6	7	7	6	4	5	6	6	8	6	8	7	6	7	7	6	4	5	6	6	8	6	8	7	6	7	7	6
sp|P08579|RU2B_HUMAN	P08579	RU2B_HUMAN	SNRPB2	225	Homo sapiens	1:Experimental evidence at protein level	U2 small nuclear ribonucleoprotein B''	1	0.999	3	60	60	60	4	4	2	3	4	3	5	5	8	7	9	6	4	4	2	3	4	3	5	5	8	7	9	6	4	4	2	3	4	3	5	5	8	7	9	6
sp|P08581-2|MET_HUMAN	P08581-2	MET_HUMAN	MET	1408	Homo sapiens		Isoform 2 of Hepatocyte growth factor receptor	1	0.999	6	8	0	8	2	0	0	2	0	0	0	0	0	0	1	3	0	0	0	0	0	0	0	0	0	0	0	0	2	0	0	2	0	0	0	0	0	0	1	3
sp|P08621|RU17_HUMAN	P08621	RU17_HUMAN	SNRNP70	437	Homo sapiens	1:Experimental evidence at protein level	U1 small nuclear ribonucleoprotein 70 kDa	1	0.999	13	138	0	138	11	10	5	3	12	14	11	13	14	14	12	19	0	0	0	0	0	0	0	0	0	0	0	0	11	10	5	3	12	14	11	13	14	14	12	19
sp|P08708|RS17_HUMAN	P08708	RS17_HUMAN	RPS17	135	Homo sapiens	1:Experimental evidence at protein level	40S ribosomal protein S17	1	0.999	7	129	129	129	16	15	3	2	17	9	14	5	8	9	14	17	16	15	3	2	17	9	14	5	8	9	14	17	16	15	3	2	17	9	14	5	8	9	14	17
sp|P08727|K1C19_HUMAN	P08727	K1C19_HUMAN	KRT19	400	Homo sapiens	1:Experimental evidence at protein level	Keratin, type I cytoskeletal 19	1	0.999	27	2953	2366	2953	324	304	401	332	417	344	144	97	138	131	163	158	272	248	332	286	346	274	117	77	104	96	104	110	324	304	401	332	417	344	144	97	138	131	163	158
sp|P08754|GNAI3_HUMAN	P08754	GNAI3_HUMAN	GNAI3	354	Homo sapiens	1:Experimental evidence at protein level	Guanine nucleotide-binding protein G(i) subunit alpha-3	1	0.999	5	19	19	46	4	2	1	1	1	1	1	2	1	1	2	2	4	2	1	1	1	1	1	2	1	1	2	2	5	4	3	3	3	2	5	4	4	5	4	4
sp|P08758|ANXA5_HUMAN	P08758	ANXA5_HUMAN	ANXA5	320	Homo sapiens	1:Experimental evidence at protein level	Annexin A5	1	0.999	12	326	326	326	33	31	32	23	54	50	16	12	14	22	21	18	33	31	32	23	54	50	16	12	14	22	21	18	33	31	32	23	54	50	16	12	14	22	21	18
sp|P08865|RSSA_HUMAN	P08865	RSSA_HUMAN	RPSA	295	Homo sapiens	1:Experimental evidence at protein level	40S ribosomal protein SA	1	0.999	8	221	16	221	14	18	18	16	25	20	21	15	19	13	23	19	2	4	0	0	2	1	0	0	1	0	3	3	14	18	18	16	25	20	21	15	19	13	23	19
sp|P09001|RM03_HUMAN	P09001	RM03_HUMAN	MRPL3	348	Homo sapiens	1:Experimental evidence at protein level	39S ribosomal protein L3, mitochondrial	1	0.999	6	23	23	23	3	3	3	2	3	2	0	2	0	2	1	2	3	3	3	2	3	2	0	2	0	2	1	2	3	3	3	2	3	2	0	2	0	2	1	2
sp|P09012|SNRPA_HUMAN	P09012	SNRPA_HUMAN	SNRPA	282	Homo sapiens	1:Experimental evidence at protein level	U1 small nuclear ribonucleoprotein A	1	0.999	2	56	56	56	4	3	7	3	5	4	5	5	5	3	6	6	4	3	7	3	5	4	5	5	5	3	6	6	4	3	7	3	5	4	5	5	5	3	6	6
sp|P09104-2|ENOG_HUMAN	P09104-2	ENOG_HUMAN	ENO2	391	Homo sapiens		Isoform 2 of Gamma-enolase	0.9996	0.999	4	4	0	57	2	2	0	0	0	0	0	0	0	0	0	0	0	0	0	0	0	0	0	0	0	0	0	0	3	3	20	17	0	1	1	1	0	2	4	5
sp|P09110|THIK_HUMAN	P09110	THIK_HUMAN	ACAA1	424	Homo sapiens	1:Experimental evidence at protein level	3-ketoacyl-CoA thiolase, peroxisomal	1	0.999	8	58	19	58	11	10	3	3	8	6	3	2	4	3	2	3	5	5	0	0	3	2	0	0	2	0	1	1	11	10	3	3	8	6	3	2	4	3	2	3
sp|P09132|SRP19_HUMAN	P09132	SRP19_HUMAN	SRP19	144	Homo sapiens	1:Experimental evidence at protein level	Signal recognition particle 19 kDa protein	1	0.999	2	12	12	12	1	1	2	1	1	1	0	1	1	1	1	1	1	1	2	1	1	1	0	1	1	1	1	1	1	1	2	1	1	1	0	1	1	1	1	1
sp|P09211|GSTP1_HUMAN	P09211	GSTP1_HUMAN	GSTP1	210	Homo sapiens	1:Experimental evidence at protein level	Glutathione S-transferase P	1	0.999	11	901	901	901	129	108	36	42	80	63	61	70	82	66	76	88	129	108	36	42	80	63	61	70	82	66	76	88	129	108	36	42	80	63	61	70	82	66	76	88
sp|P09234|RU1C_HUMAN	P09234	RU1C_HUMAN	SNRPC	159	Homo sapiens	1:Experimental evidence at protein level	U1 small nuclear ribonucleoprotein C	1	0.999	2	63	63	63	8	4	5	2	4	3	6	7	8	4	7	5	8	4	5	2	4	3	6	7	8	4	7	5	8	4	5	2	4	3	6	7	8	4	7	5
sp|P09327|VILI_HUMAN	P09327	VILI_HUMAN	VIL1	827	Homo sapiens	1:Experimental evidence at protein level	Villin-1	1	0.999	23	371	206	371	40	47	26	23	47	32	29	18	28	24	26	31	26	24	11	12	33	19	13	10	16	12	14	16	40	47	26	23	47	32	29	18	28	24	26	31
sp|P09382|LEG1_HUMAN	P09382	LEG1_HUMAN	LGALS1	135	Homo sapiens	1:Experimental evidence at protein level	Galectin-1	1	0.999	4	241	241	241	9	7	34	30	12	18	22	23	18	24	23	21	9	7	34	30	12	18	22	23	18	24	23	21	9	7	34	30	12	18	22	23	18	24	23	21
sp|P09417|DHPR_HUMAN	P09417	DHPR_HUMAN	QDPR	244	Homo sapiens	1:Experimental evidence at protein level	Dihydropteridine reductase	1	0.999	5	31	1	31	3	1	3	3	1	2	3	2	3	1	5	4	1	0	0	0	0	0	0	0	0	0	0	0	3	1	3	3	1	2	3	2	3	1	5	4
sp|P09429|HMGB1_HUMAN	P09429	HMGB1_HUMAN	HMGB1	215	Homo sapiens	1:Experimental evidence at protein level	High mobility group protein B1	1	0.999	18	615	418	615	44	38	47	47	58	47	50	53	46	54	65	66	23	19	43	41	38	38	34	38	28	33	41	42	44	38	47	47	58	47	50	53	46	54	65	66
sp|P09455|RET1_HUMAN	P09455	RET1_HUMAN	RBP1	135	Homo sapiens	1:Experimental evidence at protein level	Retinol-binding protein 1	0.9994	0.999	2	2	1	2	1	0	0	0	0	0	0	0	1	0	0	0	1	0	0	0	0	0	0	0	0	0	0	0	1	0	0	0	0	0	0	0	1	0	0	0
sp|P09467|F16P1_HUMAN	P09467	F16P1_HUMAN	FBP1	338	Homo sapiens	1:Experimental evidence at protein level	Fructose-1,6-bisphosphatase 1	1	0.999	10	71	66	71	9	7	5	5	10	10	1	3	6	3	7	5	7	6	5	5	8	10	1	3	6	3	7	5	9	7	5	5	10	10	1	3	6	3	7	5
sp|P09486|SPRC_HUMAN	P09486	SPRC_HUMAN	SPARC	303	Homo sapiens	1:Experimental evidence at protein level	SPARC	1	0.999	4	13	13	13	2	1	1	0	2	0	3	2	1	0	0	1	2	1	1	0	2	0	3	2	1	0	0	1	2	1	1	0	2	0	3	2	1	0	0	1
sp|P09488|GSTM1_HUMAN	P09488	GSTM1_HUMAN	GSTM1	218	Homo sapiens	1:Experimental evidence at protein level	Glutathione S-transferase Mu 1	1	0.999	9	106	3	106	10	10	8	7	12	11	5	10	8	8	8	9	0	0	2	1	0	0	0	0	0	0	0	0	10	10	8	7	12	11	5	10	8	8	8	9
sp|P09493-3|TPM1_HUMAN	P09493-3	TPM1_HUMAN	TPM1	284	Homo sapiens		Isoform 3 of Tropomyosin alpha-1 chain	1	0.999	20	14	0	184	1	2	1	1	1	4	0	0	2	1	0	1	0	0	0	0	0	0	0	0	0	0	0	0	15	18	20	18	16	19	6	13	16	14	13	16
sp|P09493-5|TPM1_HUMAN	P09493-5	TPM1_HUMAN	TPM1	245	Homo sapiens		Isoform 5 of Tropomyosin alpha-1 chain	1	0.999	17	74	14	148	5	6	9	8	9	6	1	5	6	5	6	8	1	1	1	1	3	1	0	1	1	1	2	1	12	14	18	14	16	13	4	10	12	10	12	13
sp|P09496-2|CLCA_HUMAN	P09496-2	CLCA_HUMAN	CLTA	218	Homo sapiens		Isoform Non-brain of Clathrin light chain A	1	0.999	4	53	0	53	6	9	5	3	4	1	4	1	5	4	6	5	0	0	0	0	0	0	0	0	0	0	0	0	6	9	5	3	4	1	4	1	5	4	6	5
sp|P09497-2|CLCB_HUMAN	P09497-2	CLCB_HUMAN	CLTB	211	Homo sapiens		Isoform Non-brain of Clathrin light chain B	1	0.999	2	18	0	18	2	3	1	0	3	1	0	1	1	1	2	3	0	0	0	0	0	0	0	0	0	0	0	0	2	3	1	0	3	1	0	1	1	1	2	3
sp|P09525-3|ANXA4_HUMAN	P09525-3	ANXA4_HUMAN	ANXA4	321	Homo sapiens		Isoform 3 of Annexin A4	1	0.999	13	435	0	435	53	44	22	26	64	40	21	16	35	35	43	36	0	0	0	0	0	0	0	0	0	0	0	0	53	44	22	26	64	40	21	16	35	35	43	36
sp|P09543-2|CN37_HUMAN	P09543-2	CN37_HUMAN	CNP	401	Homo sapiens		Isoform CNPI of 2',3'-cyclic-nucleotide 3'-phosphodiesterase	1	0.999	6	45	0	45	5	4	1	3	6	4	1	5	6	2	3	5	0	0	0	0	0	0	0	0	0	0	0	0	5	4	1	3	6	4	1	5	6	2	3	5
sp|P09622|DLDH_HUMAN	P09622	DLDH_HUMAN	DLD	509	Homo sapiens	1:Experimental evidence at protein level	Dihydrolipoyl dehydrogenase, mitochondrial	1	0.999	9	147	0	147	14	13	7	8	14	10	12	10	21	14	12	12	0	0	0	0	0	0	0	0	0	0	0	0	14	13	7	8	14	10	12	10	21	14	12	12
sp|P09651|ROA1_HUMAN	P09651	ROA1_HUMAN	HNRNPA1	372	Homo sapiens	1:Experimental evidence at protein level	Heterogeneous nuclear ribonucleoprotein A1	1	0.999	25	1343	5	1527	98	106	81	62	110	95	153	103	127	131	135	142	0	0	0	0	1	2	0	0	0	0	1	1	114	122	100	83	126	110	167	118	140	145	147	155
sp|P09661|RU2A_HUMAN	P09661	RU2A_HUMAN	SNRPA1	255	Homo sapiens	1:Experimental evidence at protein level	U2 small nuclear ribonucleoprotein A'	0.9997	0.9984	2	2	2	2	0	0	0	0	1	0	1	0	0	0	0	0	0	0	0	0	1	0	1	0	0	0	0	0	0	0	0	0	1	0	1	0	0	0	0	0
sp|P09668|CATH_HUMAN	P09668	CATH_HUMAN	CTSH	335	Homo sapiens	1:Experimental evidence at protein level	Pro-cathepsin H	0.9468	0.999	1	1	1	1	0	0	0	0	0	0	0	0	0	0	1	0	0	0	0	0	0	0	0	0	0	0	1	0	0	0	0	0	0	0	0	0	0	0	1	0
sp|P09669|COX6C_HUMAN	P09669	COX6C_HUMAN	COX6C	75	Homo sapiens	1:Experimental evidence at protein level	Cytochrome c oxidase subunit 6C	1	0.999	3	31	31	31	6	4	4	2	2	3	2	1	1	2	3	1	6	4	4	2	2	3	2	1	1	2	3	1	6	4	4	2	2	3	2	1	1	2	3	1
sp|P09874|PARP1_HUMAN	P09874	PARP1_HUMAN	PARP1	1014	Homo sapiens	1:Experimental evidence at protein level	Poly [ADP-ribose] polymerase 1	1	0.999	21	266	266	266	17	21	19	14	27	20	29	19	19	18	29	34	17	21	19	14	27	20	29	19	19	18	29	34	17	21	19	14	27	20	29	19	19	18	29	34
sp|P09913|IFIT2_HUMAN	P09913	IFIT2_HUMAN	IFIT2	472	Homo sapiens	1:Experimental evidence at protein level	Interferon-induced protein with tetratricopeptide repeats 2	0.7479	0.994	1	2	2	2	0	0	1	1	0	0	0	0	0	0	0	0	0	0	1	1	0	0	0	0	0	0	0	0	0	0	1	1	0	0	0	0	0	0	0	0
sp|P09960|LKHA4_HUMAN	P09960	LKHA4_HUMAN	LTA4H	611	Homo sapiens	1:Experimental evidence at protein level	Leukotriene A-4 hydrolase	1	0.999	14	250	0	250	17	23	15	17	25	19	17	24	23	21	26	23	0	0	0	0	0	0	0	0	0	0	0	0	17	23	15	17	25	19	17	24	23	21	26	23
sp|P09972|ALDOC_HUMAN	P09972	ALDOC_HUMAN	ALDOC	364	Homo sapiens	1:Experimental evidence at protein level	Fructose-bisphosphate aldolase C	1	0.999	13	179	179	242	19	18	9	13	22	23	9	8	13	10	21	14	19	18	9	13	22	23	9	8	13	10	21	14	26	24	14	19	29	27	12	11	21	14	27	18
sp|P0C0S5|H2AZ_HUMAN	P0C0S5	H2AZ_HUMAN	H2AZ1	128	Homo sapiens	1:Experimental evidence at protein level	Histone H2A.Z	0.9912	0.999	3	35	0	37	2	4	2	3	3	2	5	4	2	3	2	3	0	0	0	0	0	0	0	0	0	0	0	0	2	4	2	3	3	2	7	4	2	3	2	3
sp|P0C7P0|CISD3_HUMAN	P0C7P0	CISD3_HUMAN	CISD3	127	Homo sapiens	1:Experimental evidence at protein level	CDGSH iron-sulfur domain-containing protein 3, mitochondrial	0.8864	0.9977	1	3	3	3	0	0	2	1	0	0	0	0	0	0	0	0	0	0	2	1	0	0	0	0	0	0	0	0	0	0	2	1	0	0	0	0	0	0	0	0
sp|P0C7P4|UCRIL_HUMAN	P0C7P4	UCRIL_HUMAN	UQCRFS1P1	283	Homo sapiens	5:Protein uncertain	Putative cytochrome b-c1 complex subunit Rieske-like protein 1	1	0.999	3	39	0	39	4	3	1	1	7	5	2	3	3	4	3	3	0	0	0	0	0	0	0	0	0	0	0	0	4	3	1	1	7	5	2	3	3	4	3	3
sp|P0CF74|IGLC6_HUMAN	P0CF74	IGLC6_HUMAN	IGLC6	106	Homo sapiens	1:Experimental evidence at protein level	Immunoglobulin lambda constant 6	0.9981	0.999	1	2	0	2	0	2	0	0	0	0	0	0	0	0	0	0	0	0	0	0	0	0	0	0	0	0	0	0	0	2	0	0	0	0	0	0	0	0	0	0
sp|P0CG12|DERPC_HUMAN	P0CG12	DERPC_HUMAN	DERPC	524	Homo sapiens	1:Experimental evidence at protein level	Decreased expression in renal and prostate cancer protein	0.9076	0.9982	1	2	2	2	1	0	0	0	0	0	0	0	0	0	1	0	1	0	0	0	0	0	0	0	0	0	1	0	1	0	0	0	0	0	0	0	0	0	1	0
sp|P0CG22|DR4L1_HUMAN	P0CG22	DR4L1_HUMAN	DHRS4L1	281	Homo sapiens	5:Protein uncertain	Putative dehydrogenase/reductase SDR family member 4-like 1	1	0.999	1	8	0	8	0	0	1	0	1	2	0	0	1	1	1	1	0	0	0	0	0	0	0	0	0	0	0	0	0	0	1	0	1	2	0	0	1	1	1	1
sp|P0CG39|POTEJ_HUMAN	P0CG39	POTEJ_HUMAN	POTEJ	1038	Homo sapiens	3:Protein inferred from homology	POTE ankyrin domain family member J	1	0.999	6	7	5	338	1	2	0	0	2	0	0	0	0	0	1	1	1	2	0	0	2	0	0	0	0	0	0	0	22	31	36	39	44	31	34	13	19	21	24	24
sp|P0DMM9|ST1A3_HUMAN	P0DMM9	ST1A3_HUMAN	SULT1A3	295	Homo sapiens	1:Experimental evidence at protein level	Sulfotransferase 1A3	1	0.999	8	140	0	140	16	16	17	22	21	22	5	5	4	4	3	5	0	0	0	0	0	0	0	0	0	0	0	0	16	16	17	22	21	22	5	5	4	4	3	5
sp|P0DMV8|HS71A_HUMAN	P0DMV8	HS71A_HUMAN	HSPA1A	641	Homo sapiens	1:Experimental evidence at protein level	Heat shock 70 kDa protein 1A	1	0.999	24	537	0	542	53	55	50	50	55	45	47	33	37	35	36	41	0	0	0	0	0	0	0	0	0	0	0	0	53	55	50	50	56	45	47	33	38	36	37	42
sp|P0DP23|CALM1_HUMAN	P0DP23	CALM1_HUMAN	CALM1	149	Homo sapiens	1:Experimental evidence at protein level	Calmodulin-1	1	0.999	9	926	0	926	80	78	42	49	78	88	93	70	63	86	102	97	0	0	0	0	0	0	0	0	0	0	0	0	80	78	42	49	78	88	93	70	63	86	102	97
sp|P0DPB6|RPAC2_HUMAN	P0DPB6	RPAC2_HUMAN	POLR1D	133	Homo sapiens	1:Experimental evidence at protein level	DNA-directed RNA polymerases I and III subunit RPAC2	0.9469	0.999	1	2	2	2	0	0	1	0	1	0	0	0	0	0	0	0	0	0	1	0	1	0	0	0	0	0	0	0	0	0	1	0	1	0	0	0	0	0	0	0
sp|P10109|ADX_HUMAN	P10109	ADX_HUMAN	FDX1	184	Homo sapiens	1:Experimental evidence at protein level	Adrenodoxin, mitochondrial	0.9468	0.999	1	2	2	2	0	0	0	0	0	1	0	0	1	0	0	0	0	0	0	0	0	1	0	0	1	0	0	0	0	0	0	0	0	1	0	0	1	0	0	0
sp|P10155|RO60_HUMAN	P10155	RO60_HUMAN	RO60	538	Homo sapiens	1:Experimental evidence at protein level	RNA-binding protein RO60	1	0.999	8	83	4	83	6	13	5	5	11	9	3	5	4	7	8	7	2	1	0	0	1	0	0	0	0	0	0	0	6	13	5	5	11	9	3	5	4	7	8	7
sp|P10253|LYAG_HUMAN	P10253	LYAG_HUMAN	GAA	952	Homo sapiens	1:Experimental evidence at protein level	Lysosomal alpha-glucosidase	1	0.999	5	24	24	24	0	0	6	3	1	3	3	2	1	1	2	2	0	0	6	3	1	3	3	2	1	1	2	2	0	0	6	3	1	3	3	2	1	1	2	2
sp|P10301|RRAS_HUMAN	P10301	RRAS_HUMAN	RRAS	218	Homo sapiens	1:Experimental evidence at protein level	Ras-related protein R-Ras	1	0.999	2	3	3	3	0	0	1	1	1	0	0	0	0	0	0	0	0	0	1	1	1	0	0	0	0	0	0	0	0	0	1	1	1	0	0	0	0	0	0	0
sp|P10321-2|HLAC_HUMAN	P10321-2	HLAC_HUMAN	HLA-C	326	Homo sapiens		Isoform 2 of HLA class I histocompatibility antigen, C alpha chain	0.9998	0.999	2	10	0	25	0	0	3	6	0	0	0	0	0	0	1	0	0	0	0	0	0	0	0	0	0	0	0	0	3	1	3	6	2	1	0	0	2	2	3	2
sp|P10412|H14_HUMAN	P10412	H14_HUMAN	H1-4	219	Homo sapiens	1:Experimental evidence at protein level	Histone H1.4	1	0.999	6	53	44	53	2	6	5	3	9	8	1	2	1	3	8	5	1	4	4	2	7	8	1	2	1	3	7	4	2	6	5	3	9	8	1	2	1	3	8	5
sp|P10515|ODP2_HUMAN	P10515	ODP2_HUMAN	DLAT	647	Homo sapiens	1:Experimental evidence at protein level	Dihydrolipoyllysine-residue acetyltransferase component of pyruvate dehydrogenase complex, mitochondrial	1	0.999	2	14	14	14	0	0	4	5	3	1	0	0	0	0	1	0	0	0	4	5	3	1	0	0	0	0	1	0	0	0	4	5	3	1	0	0	0	0	1	0
sp|P10599|THIO_HUMAN	P10599	THIO_HUMAN	TXN	105	Homo sapiens	1:Experimental evidence at protein level	Thioredoxin	1	0.999	4	171	171	171	11	11	13	12	13	13	10	11	17	16	23	21	11	11	13	12	13	13	10	11	17	16	23	21	11	11	13	12	13	13	10	11	17	16	23	21
sp|P10606|COX5B_HUMAN	P10606	COX5B_HUMAN	COX5B	129	Homo sapiens	1:Experimental evidence at protein level	Cytochrome c oxidase subunit 5B, mitochondrial	1	0.999	3	52	52	52	5	10	2	2	6	4	2	2	3	8	5	3	5	10	2	2	6	4	2	2	3	8	5	3	5	10	2	2	6	4	2	2	3	8	5	3
sp|P10619-2|PPGB_HUMAN	P10619-2	PPGB_HUMAN	CTSA	463	Homo sapiens		Isoform 2 of Lysosomal protective protein	1	0.999	3	14	0	14	0	3	1	2	1	2	3	0	1	0	0	1	0	0	0	0	0	0	0	0	0	0	0	0	0	3	1	2	1	2	3	0	1	0	0	1
sp|P10620|MGST1_HUMAN	P10620	MGST1_HUMAN	MGST1	155	Homo sapiens	1:Experimental evidence at protein level	Microsomal glutathione S-transferase 1	1	0.999	3	35	22	35	3	3	1	1	1	2	3	1	4	5	5	6	2	3	0	0	0	0	2	0	3	4	4	4	3	3	1	1	1	2	3	1	4	5	5	6
sp|P10644|KAP0_HUMAN	P10644	KAP0_HUMAN	PRKAR1A	381	Homo sapiens	1:Experimental evidence at protein level	cAMP-dependent protein kinase type I-alpha regulatory subunit	1	0.999	5	35	16	35	0	1	4	2	2	1	4	5	2	3	6	5	0	0	1	0	1	1	3	4	1	3	1	1	0	1	4	2	2	1	4	5	2	3	6	5
sp|P10768|ESTD_HUMAN	P10768	ESTD_HUMAN	ESD	282	Homo sapiens	1:Experimental evidence at protein level	S-formylglutathione hydrolase	1	0.999	7	146	146	146	11	15	8	11	15	12	8	11	11	8	16	20	11	15	8	11	15	12	8	11	11	8	16	20	11	15	8	11	15	12	8	11	11	8	16	20
sp|P10809|CH60_HUMAN	P10809	CH60_HUMAN	HSPD1	573	Homo sapiens	1:Experimental evidence at protein level	60 kDa heat shock protein, mitochondrial	1	0.999	31	3313	2103	3313	341	340	133	99	291	277	287	216	331	313	358	327	188	191	117	91	170	158	194	133	215	194	241	211	341	340	133	99	291	277	287	216	331	313	358	327
sp|P10909-2|CLUS_HUMAN	P10909-2	CLUS_HUMAN	CLU	501	Homo sapiens		Isoform 2 of Clusterin	1	0.999	6	79	0	79	7	3	2	1	3	6	12	7	9	11	7	11	0	0	0	0	0	0	0	0	0	0	0	0	7	3	2	1	3	6	12	7	9	11	7	11
sp|P10915|HPLN1_HUMAN	P10915	HPLN1_HUMAN	HAPLN1	354	Homo sapiens	2:Experimental evidence at transcript level	Hyaluronan and proteoglycan link protein 1	0.7652	0.9945	1	2	2	2	0	0	0	0	2	0	0	0	0	0	0	0	0	0	0	0	2	0	0	0	0	0	0	0	0	0	0	0	2	0	0	0	0	0	0	0
sp|P11021|BIP_HUMAN	P11021	BIP_HUMAN	HSPA5	654	Homo sapiens	1:Experimental evidence at protein level	Endoplasmic reticulum chaperone BiP	1	0.999	38	1011	1011	1014	89	94	59	57	92	97	73	69	103	82	103	93	89	94	59	57	92	97	73	69	103	82	103	93	90	95	59	57	93	97	73	69	103	82	103	93
sp|P11047|LAMC1_HUMAN	P11047	LAMC1_HUMAN	LAMC1	1609	Homo sapiens	1:Experimental evidence at protein level	Laminin subunit gamma-1	1	0.999	43	2867	2769	2867	300	280	148	128	243	225	338	240	281	238	202	244	292	274	139	111	235	218	327	232	275	232	197	237	300	280	148	128	243	225	338	240	281	238	202	244
sp|P11142|HSP7C_HUMAN	P11142	HSP7C_HUMAN	HSPA8	646	Homo sapiens	1:Experimental evidence at protein level	Heat shock cognate 71 kDa protein	1	0.999	27	1546	212	1546	158	140	110	111	126	131	138	126	132	114	129	131	16	17	26	20	13	17	14	21	17	15	20	16	158	140	110	111	126	131	138	126	132	114	129	131
sp|P11166|GTR1_HUMAN	P11166	GTR1_HUMAN	SLC2A1	492	Homo sapiens	1:Experimental evidence at protein level	Solute carrier family 2, facilitated glucose transporter member 1	1	0.999	3	42	42	42	3	3	4	4	2	2	3	4	3	5	5	4	3	3	4	4	2	2	3	4	3	5	5	4	3	3	4	4	2	2	3	4	3	5	5	4
sp|P11172-2|UMPS_HUMAN	P11172-2	UMPS_HUMAN	UMPS	302	Homo sapiens		Isoform 2 of Uridine 5'-monophosphate synthase	1	0.999	4	13	0	13	0	0	2	1	2	3	0	3	1	1	0	0	0	0	0	0	0	0	0	0	0	0	0	0	0	0	2	1	2	3	0	3	1	1	0	0
sp|P11177-2|ODPB_HUMAN	P11177-2	ODPB_HUMAN	PDHB	341	Homo sapiens		Isoform 2 of Pyruvate dehydrogenase E1 component subunit beta, mitochondrial	1	0.999	7	106	0	106	12	11	10	11	9	7	8	6	7	7	11	7	0	0	0	0	0	0	0	0	0	0	0	0	12	11	10	11	9	7	8	6	7	7	11	7
sp|P11182|ODB2_HUMAN	P11182	ODB2_HUMAN	DBT	482	Homo sapiens	1:Experimental evidence at protein level	Lipoamide acyltransferase component of branched-chain alpha-keto acid dehydrogenase complex, mitochondrial	0.9469	0.999	1	12	12	12	1	1	0	0	1	2	1	1	2	1	1	1	1	1	0	0	1	2	1	1	2	1	1	1	1	1	0	0	1	2	1	1	2	1	1	1
sp|P11216|PYGB_HUMAN	P11216	PYGB_HUMAN	PYGB	843	Homo sapiens	1:Experimental evidence at protein level	Glycogen phosphorylase, brain form	1	0.999	42	1021	882	1021	98	113	114	122	120	107	45	52	65	60	62	63	78	99	99	104	103	96	39	46	56	53	55	54	98	113	114	122	120	107	45	52	65	60	62	63
sp|P11233|RALA_HUMAN	P11233	RALA_HUMAN	RALA	206	Homo sapiens	1:Experimental evidence at protein level	Ras-related protein Ral-A	1	0.999	4	14	14	20	3	1	0	0	2	2	1	1	1	1	1	1	3	1	0	0	2	2	1	1	1	1	1	1	4	5	0	0	3	2	1	1	1	1	1	1
sp|P11234-2|RALB_HUMAN	P11234-2	RALB_HUMAN	RALB	228	Homo sapiens		Isoform 2 of Ras-related protein Ral-B	1	0.999	5	63	0	63	5	9	5	5	7	6	4	4	5	4	5	4	0	0	0	0	0	0	0	0	0	0	0	0	5	9	5	5	7	6	4	4	5	4	5	4
sp|P11274-2|BCR_HUMAN	P11274-2	BCR_HUMAN	BCR	1227	Homo sapiens		Isoform 2 of Breakpoint cluster region protein	1	0.9989	5	8	0	10	0	2	4	1	1	0	0	0	0	0	0	0	0	0	0	0	0	0	0	0	0	0	0	0	0	2	5	1	2	0	0	0	0	0	0	0
sp|P11279-2|LAMP1_HUMAN	P11279-2	LAMP1_HUMAN	LAMP1	364	Homo sapiens		Isoform 2 of Lysosome-associated membrane glycoprotein 1	1	0.999	2	5	0	5	1	0	1	0	1	1	0	0	0	1	0	0	0	0	0	0	0	0	0	0	0	0	0	0	1	0	1	0	1	1	0	0	0	1	0	0
sp|P11310-2|ACADM_HUMAN	P11310-2	ACADM_HUMAN	ACADM	425	Homo sapiens		Isoform 2 of Medium-chain specific acyl-CoA dehydrogenase, mitochondrial	1	0.999	4	47	0	47	6	8	3	3	3	4	2	5	3	3	4	3	0	0	0	0	0	0	0	0	0	0	0	0	6	8	3	3	3	4	2	5	3	3	4	3
sp|P11387|TOP1_HUMAN	P11387	TOP1_HUMAN	TOP1	765	Homo sapiens	1:Experimental evidence at protein level	DNA topoisomerase 1	1	0.999	12	142	131	142	14	17	8	11	18	15	2	10	9	8	15	15	13	16	7	10	17	14	2	9	8	7	14	14	14	17	8	11	18	15	2	10	9	8	15	15
sp|P11388-2|TOP2A_HUMAN	P11388-2	TOP2A_HUMAN	TOP2A	1557	Homo sapiens		Isoform 2 of DNA topoisomerase 2-alpha	0.9985	0.999	3	3	0	16	0	0	0	0	0	0	0	0	1	0	0	2	0	0	0	0	0	0	0	0	0	0	0	0	1	1	1	0	0	1	1	1	1	1	3	5
sp|P11413-2|G6PD_HUMAN	P11413-2	G6PD_HUMAN	G6PD	561	Homo sapiens		Isoform Long of Glucose-6-phosphate 1-dehydrogenase	1	0.999	20	391	0	391	31	28	21	19	35	33	34	28	43	37	41	41	0	0	0	0	0	0	0	0	0	0	0	0	31	28	21	19	35	33	34	28	43	37	41	41
sp|P11441|UBL4A_HUMAN	P11441	UBL4A_HUMAN	UBL4A	157	Homo sapiens	1:Experimental evidence at protein level	Ubiquitin-like protein 4A	0.9469	0.999	1	14	14	14	1	1	0	0	2	1	2	1	2	2	1	1	1	1	0	0	2	1	2	1	2	2	1	1	1	1	0	0	2	1	2	1	2	2	1	1
sp|P11498|PYC_HUMAN	P11498	PYC_HUMAN	PC	1178	Homo sapiens	1:Experimental evidence at protein level	Pyruvate carboxylase, mitochondrial	1	0.999	3	3	2	3	0	1	0	0	1	1	0	0	0	0	0	0	0	1	0	0	0	1	0	0	0	0	0	0	0	1	0	0	1	1	0	0	0	0	0	0
sp|P11586|C1TC_HUMAN	P11586	C1TC_HUMAN	MTHFD1	935	Homo sapiens	1:Experimental evidence at protein level	C-1-tetrahydrofolate synthase, cytoplasmic	1	0.999	16	225	225	225	11	19	10	13	25	16	20	25	21	19	24	22	11	19	10	13	25	16	20	25	21	19	24	22	11	19	10	13	25	16	20	25	21	19	24	22
sp|P11717|MPRI_HUMAN	P11717	MPRI_HUMAN	IGF2R	2491	Homo sapiens	1:Experimental evidence at protein level	Cation-independent mannose-6-phosphate receptor	1	0.999	5	16	16	16	0	0	3	1	2	4	0	2	1	0	1	2	0	0	3	1	2	4	0	2	1	0	1	2	0	0	3	1	2	4	0	2	1	0	1	2
sp|P11766|ADHX_HUMAN	P11766	ADHX_HUMAN	ADH5	374	Homo sapiens	1:Experimental evidence at protein level	Alcohol dehydrogenase class-3	1	0.999	7	138	138	138	11	15	8	8	16	8	13	10	14	11	13	11	11	15	8	8	16	8	13	10	14	11	13	11	11	15	8	8	16	8	13	10	14	11	13	11
sp|P11802-2|CDK4_HUMAN	P11802-2	CDK4_HUMAN	CDK4	183	Homo sapiens		Isoform 2 of Cyclin-dependent kinase 4	1	0.999	3	3	0	3	0	0	1	0	0	0	1	0	1	0	0	0	0	0	0	0	0	0	0	0	0	0	0	0	0	0	1	0	0	0	1	0	1	0	0	0
sp|P11908-2|PRPS2_HUMAN	P11908-2	PRPS2_HUMAN	PRPS2	321	Homo sapiens		Isoform 2 of Ribose-phosphate pyrophosphokinase 2	1	0.999	4	69	0	69	8	6	1	1	6	7	5	4	6	6	9	10	0	0	0	0	0	0	0	0	0	0	0	0	8	6	1	1	6	7	5	4	6	6	9	10
sp|P11940-2|PABP1_HUMAN	P11940-2	PABP1_HUMAN	PABPC1	547	Homo sapiens		Isoform 2 of Polyadenylate-binding protein 1	1	0.999	14	209	0	209	18	17	11	10	19	19	18	17	16	20	23	21	0	0	0	0	0	0	0	0	0	0	0	0	18	17	11	10	19	19	18	17	16	20	23	21
sp|P12004|PCNA_HUMAN	P12004	PCNA_HUMAN	PCNA	261	Homo sapiens	1:Experimental evidence at protein level	Proliferating cell nuclear antigen	1	0.999	2	29	29	29	3	1	0	0	1	1	4	2	4	2	4	7	3	1	0	0	1	1	4	2	4	2	4	7	3	1	0	0	1	1	4	2	4	2	4	7
sp|P12074|CX6A1_HUMAN	P12074	CX6A1_HUMAN	COX6A1	109	Homo sapiens	1:Experimental evidence at protein level	Cytochrome c oxidase subunit 6A1, mitochondrial	1	0.999	3	75	75	75	7	5	8	13	9	8	3	2	4	5	6	5	7	5	8	13	9	8	3	2	4	5	6	5	7	5	8	13	9	8	3	2	4	5	6	5
sp|P12081|HARS1_HUMAN	P12081	HARS1_HUMAN	HARS1	509	Homo sapiens	1:Experimental evidence at protein level	Histidine--tRNA ligase, cytoplasmic	1	0.999	6	61	61	61	7	4	5	4	7	6	5	4	5	4	5	5	7	4	5	4	7	6	5	4	5	4	5	5	7	4	5	4	7	6	5	4	5	4	5	5
sp|P12235|ADT1_HUMAN	P12235	ADT1_HUMAN	SLC25A4	298	Homo sapiens	1:Experimental evidence at protein level	ADP/ATP translocase 1	1	0.999	5	57	13	194	7	3	1	1	8	7	3	4	5	5	6	7	1	1	1	1	1	1	1	1	1	2	1	1	18	12	36	27	20	17	9	9	9	10	13	14
sp|P12236|ADT3_HUMAN	P12236	ADT3_HUMAN	SLC25A6	298	Homo sapiens	1:Experimental evidence at protein level	ADP/ATP translocase 3	0.9998	0.9987	5	10	10	191	2	0	0	0	1	1	0	0	1	1	2	2	2	0	0	0	1	1	0	0	1	1	2	2	19	11	35	26	20	17	8	8	9	9	14	15
sp|P12268|IMDH2_HUMAN	P12268	IMDH2_HUMAN	IMPDH2	514	Homo sapiens	1:Experimental evidence at protein level	Inosine-5'-monophosphate dehydrogenase 2	1	0.999	18	278	278	278	23	26	19	12	23	25	23	27	22	28	24	26	23	26	19	12	23	25	23	27	22	28	24	26	23	26	19	12	23	25	23	27	22	28	24	26
sp|P12270|TPR_HUMAN	P12270	TPR_HUMAN	TPR	2363	Homo sapiens	1:Experimental evidence at protein level	Nucleoprotein TPR	1	0.999	32	202	104	202	15	10	21	17	14	10	9	17	25	17	23	24	8	3	11	12	6	4	3	8	16	9	12	12	15	10	21	17	14	10	9	17	25	17	23	24
sp|P12277|KCRB_HUMAN	P12277	KCRB_HUMAN	CKB	381	Homo sapiens	1:Experimental evidence at protein level	Creatine kinase B-type	1	0.999	2	9	9	9	2	1	0	0	3	3	0	0	0	0	0	0	2	1	0	0	3	3	0	0	0	0	0	0	2	1	0	0	3	3	0	0	0	0	0	0
sp|P12429|ANXA3_HUMAN	P12429	ANXA3_HUMAN	ANXA3	323	Homo sapiens	1:Experimental evidence at protein level	Annexin A3	1	0.999	18	385	385	385	28	35	36	25	48	41	18	21	35	34	31	33	28	35	36	25	48	41	18	21	35	34	31	33	28	35	36	25	48	41	18	21	35	34	31	33
sp|P12532|KCRU_HUMAN	P12532	KCRU_HUMAN	CKMT1A	417	Homo sapiens	1:Experimental evidence at protein level	Creatine kinase U-type, mitochondrial	1	0.999	12	138	3	138	20	27	13	11	19	9	8	5	5	7	6	8	1	2	0	0	0	0	0	0	0	0	0	0	20	27	13	11	19	9	8	5	5	7	6	8
sp|P12694-2|ODBA_HUMAN	P12694-2	ODBA_HUMAN	BCKDHA	448	Homo sapiens		Isoform 2 of 2-oxoisovalerate dehydrogenase subunit alpha, mitochondrial	1	0.999	2	36	0	36	2	2	5	2	2	2	3	5	2	5	4	2	0	0	0	0	0	0	0	0	0	0	0	0	2	2	5	2	2	2	3	5	2	5	4	2
sp|P12814-3|ACTN1_HUMAN	P12814-3	ACTN1_HUMAN	ACTN1	914	Homo sapiens		Isoform 3 of Alpha-actinin-1	1	0.999	47	389	0	1154	38	26	26	27	42	22	32	21	35	35	42	43	0	0	0	0	0	0	0	0	0	0	0	0	111	97	96	76	97	72	122	81	96	93	111	102
sp|P12821|ACE_HUMAN	P12821	ACE_HUMAN	ACE	1306	Homo sapiens	1:Experimental evidence at protein level	Angiotensin-converting enzyme	1	0.999	2	4	0	4	0	1	2	1	0	0	0	0	0	0	0	0	0	0	0	0	0	0	0	0	0	0	0	0	0	1	2	1	0	0	0	0	0	0	0	0
sp|P12830|CADH1_HUMAN	P12830	CADH1_HUMAN	CDH1	882	Homo sapiens	1:Experimental evidence at protein level	Cadherin-1	1	0.999	6	61	9	61	6	6	3	4	12	6	2	1	4	2	7	8	1	2	0	0	1	1	0	0	2	0	1	1	6	6	3	4	12	6	2	1	4	2	7	8
sp|P12931-2|SRC_HUMAN	P12931-2	SRC_HUMAN	SRC	542	Homo sapiens		Isoform 2 of Proto-oncogene tyrosine-protein kinase Src	0.9981	0.999	2	20	0	20	1	2	3	2	1	1	2	2	2	2	1	1	0	0	0	0	0	0	0	0	0	0	0	0	1	2	3	2	1	1	2	2	2	2	1	1
sp|P12955-3|PEPD_HUMAN	P12955-3	PEPD_HUMAN	PEPD	429	Homo sapiens		Isoform 3 of Xaa-Pro dipeptidase	1	0.999	4	20	0	20	1	1	0	0	2	1	3	1	4	4	1	2	0	0	0	0	0	0	0	0	0	0	0	0	1	1	0	0	2	1	3	1	4	4	1	2
sp|P12956|XRCC6_HUMAN	P12956	XRCC6_HUMAN	XRCC6	609	Homo sapiens	1:Experimental evidence at protein level	X-ray repair cross-complementing protein 6	1	0.999	24	467	30	467	33	40	41	31	39	45	31	36	44	39	41	47	2	3	2	2	3	3	2	3	3	2	2	3	33	40	41	31	39	45	31	36	44	39	41	47
sp|P13010|XRCC5_HUMAN	P13010	XRCC5_HUMAN	XRCC5	732	Homo sapiens	1:Experimental evidence at protein level	X-ray repair cross-complementing protein 5	1	0.999	19	309	309	309	22	27	23	27	33	26	18	21	28	29	28	27	22	27	23	27	33	26	18	21	28	29	28	27	22	27	23	27	33	26	18	21	28	29	28	27
sp|P13051-2|UNG_HUMAN	P13051-2	UNG_HUMAN	UNG	304	Homo sapiens		Isoform 1 of Uracil-DNA glycosylase	1	0.999	3	27	0	27	2	3	4	3	0	1	0	4	3	2	3	2	0	0	0	0	0	0	0	0	0	0	0	0	2	3	4	3	0	1	0	4	3	2	3	2
sp|P13073|COX41_HUMAN	P13073	COX41_HUMAN	COX4I1	169	Homo sapiens	1:Experimental evidence at protein level	Cytochrome c oxidase subunit 4 isoform 1, mitochondrial	1	0.999	7	45	45	45	6	5	1	3	6	7	1	0	3	4	3	6	6	5	1	3	6	7	1	0	3	4	3	6	6	5	1	3	6	7	1	0	3	4	3	6
sp|P13284|GILT_HUMAN	P13284	GILT_HUMAN	IFI30	250	Homo sapiens	1:Experimental evidence at protein level	Gamma-interferon-inducible lysosomal thiol reductase	0.9448	0.999	1	1	1	1	0	0	0	0	0	0	0	0	0	1	0	0	0	0	0	0	0	0	0	0	0	1	0	0	0	0	0	0	0	0	0	0	0	1	0	0
sp|P13489|RINI_HUMAN	P13489	RINI_HUMAN	RNH1	461	Homo sapiens	1:Experimental evidence at protein level	Ribonuclease inhibitor	1	0.999	11	197	197	197	23	21	10	8	28	27	11	14	10	13	16	16	23	21	10	8	28	27	11	14	10	13	16	16	23	21	10	8	28	27	11	14	10	13	16	16
sp|P13639|EF2_HUMAN	P13639	EF2_HUMAN	EEF2	858	Homo sapiens	1:Experimental evidence at protein level	Elongation factor 2	1	0.999	32	1141	1141	1141	99	103	88	71	111	94	94	73	101	103	98	106	99	103	88	71	111	94	94	73	101	103	98	106	99	103	88	71	111	94	94	73	101	103	98	106
sp|P13645|K1C10_HUMAN	P13645	K1C10_HUMAN	KRT10	584	Homo sapiens	1:Experimental evidence at protein level	Keratin, type I cytoskeletal 10	1	0.999	13	48	42	48	1	1	2	4	17	11	0	0	2	2	6	2	1	1	2	4	14	10	0	0	2	2	4	2	1	1	2	4	17	11	0	0	2	2	6	2
sp|P13667|PDIA4_HUMAN	P13667	PDIA4_HUMAN	PDIA4	645	Homo sapiens	1:Experimental evidence at protein level	Protein disulfide-isomerase A4	1	0.999	21	363	363	363	35	35	19	14	36	29	26	27	34	31	41	36	35	35	19	14	36	29	26	27	34	31	41	36	35	35	19	14	36	29	26	27	34	31	41	36
sp|P13674-2|P4HA1_HUMAN	P13674-2	P4HA1_HUMAN	P4HA1	534	Homo sapiens		Isoform 2 of Prolyl 4-hydroxylase subunit alpha-1	1	0.999	4	24	0	24	5	2	0	1	3	2	2	1	2	1	2	3	0	0	0	0	0	0	0	0	0	0	0	0	5	2	0	1	3	2	2	1	2	1	2	3
sp|P13693|TCTP_HUMAN	P13693	TCTP_HUMAN	TPT1	172	Homo sapiens	1:Experimental evidence at protein level	Translationally-controlled tumor protein	1	0.999	5	137	68	137	9	9	9	11	10	13	15	10	12	13	13	13	4	3	1	3	5	10	9	5	7	7	7	7	9	9	9	11	10	13	15	10	12	13	13	13
sp|P13716|HEM2_HUMAN	P13716	HEM2_HUMAN	ALAD	330	Homo sapiens	1:Experimental evidence at protein level	Delta-aminolevulinic acid dehydratase	1	0.999	7	110	23	110	7	9	14	20	11	10	9	6	9	3	8	4	1	2	2	4	3	2	2	1	3	0	2	1	7	9	14	20	11	10	9	6	9	3	8	4
sp|P13726-2|TF_HUMAN	P13726-2	TF_HUMAN	F3	238	Homo sapiens		Isoform 2 of Tissue factor	0.9469	0.999	1	10	0	10	1	1	0	0	1	1	1	0	2	0	1	2	0	0	0	0	0	0	0	0	0	0	0	0	1	1	0	0	1	1	1	0	2	0	1	2
sp|P13797|PLST_HUMAN	P13797	PLST_HUMAN	PLS3	630	Homo sapiens	1:Experimental evidence at protein level	Plastin-3	1	0.999	8	44	17	105	5	5	5	4	5	5	1	4	3	2	3	2	2	1	2	1	1	2	1	2	2	1	1	1	10	10	10	9	11	11	4	10	8	6	9	7
sp|P13798|ACPH_HUMAN	P13798	ACPH_HUMAN	APEH	732	Homo sapiens	1:Experimental evidence at protein level	Acylamino-acid-releasing enzyme	1	0.999	4	26	26	26	3	4	0	2	3	4	1	2	1	1	3	2	3	4	0	2	3	4	1	2	1	1	3	2	3	4	0	2	3	4	1	2	1	1	3	2
sp|P13804|ETFA_HUMAN	P13804	ETFA_HUMAN	ETFA	333	Homo sapiens	1:Experimental evidence at protein level	Electron transfer flavoprotein subunit alpha, mitochondrial	1	0.999	10	156	1	156	14	24	9	12	23	19	9	7	8	5	9	17	0	0	0	0	1	0	0	0	0	0	0	0	14	24	9	12	23	19	9	7	8	5	9	17
sp|P13807-2|GYS1_HUMAN	P13807-2	GYS1_HUMAN	GYS1	673	Homo sapiens		Isoform 2 of Glycogen [starch] synthase, muscle	1	0.999	2	3	0	3	0	0	0	0	1	1	0	0	0	1	0	0	0	0	0	0	0	0	0	0	0	0	0	0	0	0	0	0	1	1	0	0	0	1	0	0
sp|P13861-2|KAP2_HUMAN	P13861-2	KAP2_HUMAN	PRKAR2A	382	Homo sapiens		Isoform 2 of cAMP-dependent protein kinase type II-alpha regulatory subunit	1	0.999	6	104	0	104	12	10	6	5	14	8	5	8	9	8	8	11	0	0	0	0	0	0	0	0	0	0	0	0	12	10	6	5	14	8	5	8	9	8	8	11
sp|P13984|T2FB_HUMAN	P13984	T2FB_HUMAN	GTF2F2	249	Homo sapiens	1:Experimental evidence at protein level	General transcription factor IIF subunit 2	1	0.999	4	40	40	40	5	5	2	3	1	2	2	4	3	4	3	6	5	5	2	3	1	2	2	4	3	4	3	6	5	5	2	3	1	2	2	4	3	4	3	6
sp|P13987-2|CD59_HUMAN	P13987-2	CD59_HUMAN	CD59	130	Homo sapiens		Isoform 2 of CD59 glycoprotein	1	0.999	2	30	0	30	2	2	5	4	2	2	2	2	2	3	2	2	0	0	0	0	0	0	0	0	0	0	0	0	2	2	5	4	2	2	2	2	2	3	2	2
sp|P13995-2|MTDC_HUMAN	P13995-2	MTDC_HUMAN	MTHFD2	248	Homo sapiens		Isoform 2 of Bifunctional methylenetetrahydrofolate dehydrogenase/cyclohydrolase, mitochondrial	1	0.999	4	80	0	80	2	4	2	2	4	6	8	9	9	8	12	14	0	0	0	0	0	0	0	0	0	0	0	0	2	4	2	2	4	6	8	9	9	8	12	14
sp|P14091-2|CATE_HUMAN	P14091-2	CATE_HUMAN	CTSE	363	Homo sapiens		Isoform 2 of Cathepsin E	0.9469	0.999	1	10	0	10	2	2	1	1	1	3	0	0	0	0	0	0	0	0	0	0	0	0	0	0	0	0	0	0	2	2	1	1	1	3	0	0	0	0	0	0
sp|P14174|MIF_HUMAN	P14174	MIF_HUMAN	MIF	115	Homo sapiens	1:Experimental evidence at protein level	Macrophage migration inhibitory factor	1	0.999	3	107	107	107	7	7	8	9	22	16	2	2	3	2	16	13	7	7	8	9	22	16	2	2	3	2	16	13	7	7	8	9	22	16	2	2	3	2	16	13
sp|P14209-3|CD99_HUMAN	P14209-3	CD99_HUMAN	CD99	169	Homo sapiens		Isoform 3 of CD99 antigen	0.9469	0.999	1	19	0	19	1	1	1	1	4	1	2	1	2	2	1	2	0	0	0	0	0	0	0	0	0	0	0	0	1	1	1	1	4	1	2	1	2	2	1	2
sp|P14314-2|GLU2B_HUMAN	P14314-2	GLU2B_HUMAN	PRKCSH	525	Homo sapiens		Isoform 2 of Glucosidase 2 subunit beta	1	0.999	17	217	0	217	23	29	7	8	22	17	19	15	19	17	22	19	0	0	0	0	0	0	0	0	0	0	0	0	23	29	7	8	22	17	19	15	19	17	22	19
sp|P14324-2|FPPS_HUMAN	P14324-2	FPPS_HUMAN	FDPS	353	Homo sapiens		Isoform 2 of Farnesyl pyrophosphate synthase	1	0.999	6	84	0	84	8	7	10	8	10	6	5	6	4	6	8	6	0	0	0	0	0	0	0	0	0	0	0	0	8	7	10	8	10	6	5	6	4	6	8	6
sp|P14406|CX7A2_HUMAN	P14406	CX7A2_HUMAN	COX7A2	83	Homo sapiens	1:Experimental evidence at protein level	Cytochrome c oxidase subunit 7A2, mitochondrial	0.9469	0.999	1	5	5	5	2	2	0	0	1	0	0	0	0	0	0	0	2	2	0	0	1	0	0	0	0	0	0	0	2	2	0	0	1	0	0	0	0	0	0	0
sp|P14543|NID1_HUMAN	P14543	NID1_HUMAN	NID1	1247	Homo sapiens	1:Experimental evidence at protein level	Nidogen-1	1	0.999	9	383	83	383	28	23	32	22	20	25	58	44	37	29	34	31	8	6	4	8	2	2	9	12	7	8	8	9	28	23	32	22	20	25	58	44	37	29	34	31
sp|P14550|AK1A1_HUMAN	P14550	AK1A1_HUMAN	AKR1A1	325	Homo sapiens	1:Experimental evidence at protein level	Aldo-keto reductase family 1 member A1	1	0.999	8	68	68	68	5	7	5	7	13	7	4	4	3	5	5	3	5	7	5	7	13	7	4	4	3	5	5	3	5	7	5	7	13	7	4	4	3	5	5	3
sp|P14618|KPYM_HUMAN	P14618	KPYM_HUMAN	PKM	531	Homo sapiens	1:Experimental evidence at protein level	Pyruvate kinase PKM	1	0.999	38	4994	0	4994	375	388	594	397	465	461	431	377	385	377	371	373	0	0	0	0	0	0	0	0	0	0	0	0	375	388	594	397	465	461	431	377	385	377	371	373
sp|P14625|ENPL_HUMAN	P14625	ENPL_HUMAN	HSP90B1	803	Homo sapiens	1:Experimental evidence at protein level	Endoplasmin	1	0.999	30	705	662	725	44	70	41	28	67	47	70	49	77	65	75	72	41	67	40	23	61	45	68	44	73	61	71	68	46	71	43	30	69	49	71	50	79	67	77	73
sp|P14678-2|RSMB_HUMAN	P14678-2	RSMB_HUMAN	SNRPB	231	Homo sapiens		Isoform SM-B of Small nuclear ribonucleoprotein-associated proteins B and B'	1	0.999	6	91	0	91	6	5	10	10	7	3	5	7	9	10	9	10	0	0	0	0	0	0	0	0	0	0	0	0	6	5	10	10	7	3	5	7	9	10	9	10
sp|P14735|IDE_HUMAN	P14735	IDE_HUMAN	IDE	1019	Homo sapiens	1:Experimental evidence at protein level	Insulin-degrading enzyme	1	0.999	8	35	26	35	3	3	5	4	4	2	2	2	3	2	3	2	3	2	1	3	3	2	2	1	3	2	3	1	3	3	5	4	4	2	2	2	3	2	3	2
sp|P14854|CX6B1_HUMAN	P14854	CX6B1_HUMAN	COX6B1	86	Homo sapiens	1:Experimental evidence at protein level	Cytochrome c oxidase subunit 6B1	1	0.999	2	31	31	31	6	7	4	2	2	3	1	2	1	1	1	1	6	7	4	2	2	3	1	2	1	1	1	1	6	7	4	2	2	3	1	2	1	1	1	1
sp|P14859-2|PO2F1_HUMAN	P14859-2	PO2F1_HUMAN	POU2F1	755	Homo sapiens		Isoform 2 of POU domain, class 2, transcription factor 1	0.9983	0.999	2	5	1	5	0	0	0	0	0	0	0	0	1	0	2	2	0	0	0	0	0	0	0	0	0	0	1	0	0	0	0	0	0	0	0	0	1	0	2	2
sp|P14866|HNRPL_HUMAN	P14866	HNRPL_HUMAN	HNRNPL	589	Homo sapiens	1:Experimental evidence at protein level	Heterogeneous nuclear ribonucleoprotein L	1	0.999	16	460	89	460	30	32	26	19	40	37	38	42	46	49	46	55	10	4	5	6	8	7	8	5	10	7	10	9	30	32	26	19	40	37	38	42	46	49	46	55
sp|P14868|SYDC_HUMAN	P14868	SYDC_HUMAN	DARS1	501	Homo sapiens	1:Experimental evidence at protein level	Aspartate--tRNA ligase, cytoplasmic	1	0.999	8	100	28	100	7	9	5	4	10	7	6	9	9	12	11	11	1	2	3	3	3	2	2	3	2	4	2	1	7	9	5	4	10	7	6	9	9	12	11	11
sp|P14923|PLAK_HUMAN	P14923	PLAK_HUMAN	JUP	745	Homo sapiens	1:Experimental evidence at protein level	Junction plakoglobin	1	0.999	19	279	279	414	22	18	24	29	30	28	17	15	26	22	24	24	22	18	24	29	30	28	17	15	26	22	24	24	25	22	56	53	43	43	24	23	32	29	33	31
sp|P14927-2|QCR7_HUMAN	P14927-2	QCR7_HUMAN	UQCRB	140	Homo sapiens		Isoform 2 of Cytochrome b-c1 complex subunit 7	1	0.999	2	65	0	65	4	4	8	6	5	4	7	6	5	5	6	5	0	0	0	0	0	0	0	0	0	0	0	0	4	4	8	6	5	4	7	6	5	5	6	5
sp|P15104|GLNA_HUMAN	P15104	GLNA_HUMAN	GLUL	373	Homo sapiens	1:Experimental evidence at protein level	Glutamine synthetase	1	0.999	2	5	5	5	0	0	0	0	0	0	2	0	1	0	1	1	0	0	0	0	0	0	2	0	1	0	1	1	0	0	0	0	0	0	2	0	1	0	1	1
sp|P15151-2|PVR_HUMAN	P15151-2	PVR_HUMAN	PVR	372	Homo sapiens		Isoform Beta of Poliovirus receptor	1	0.999	2	12	0	12	1	0	4	4	0	2	0	0	0	1	0	0	0	0	0	0	0	0	0	0	0	0	0	0	1	0	4	4	0	2	0	0	0	1	0	0
sp|P15170-2|ERF3A_HUMAN	P15170-2	ERF3A_HUMAN	GSPT1	636	Homo sapiens		Isoform 2 of Eukaryotic peptide chain release factor GTP-binding subunit ERF3A	1	0.999	6	34	0	34	2	0	3	3	6	2	2	3	3	4	3	3	0	0	0	0	0	0	0	0	0	0	0	0	2	0	3	3	6	2	2	3	3	4	3	3
sp|P15291-2|B4GT1_HUMAN	P15291-2	B4GT1_HUMAN	B4GALT1	385	Homo sapiens		Isoform Short of Beta-1,4-galactosyltransferase 1	1	0.999	2	16	0	16	1	2	2	2	1	2	0	1	1	2	1	1	0	0	0	0	0	0	0	0	0	0	0	0	1	2	2	2	1	2	0	1	1	2	1	1
sp|P15311|EZRI_HUMAN	P15311	EZRI_HUMAN	EZR	586	Homo sapiens	1:Experimental evidence at protein level	Ezrin	1	0.999	30	749	636	749	69	59	48	66	92	73	64	43	56	55	62	62	59	49	42	52	78	67	58	36	49	46	49	51	69	59	48	66	92	73	64	43	56	55	62	62
sp|P15374|UCHL3_HUMAN	P15374	UCHL3_HUMAN	UCHL3	230	Homo sapiens	1:Experimental evidence at protein level	Ubiquitin carboxyl-terminal hydrolase isozyme L3	1	0.999	8	76	76	76	6	7	7	5	6	8	4	6	8	5	5	9	6	7	7	5	6	8	4	6	8	5	5	9	6	7	7	5	6	8	4	6	8	5	5	9
sp|P15428-3|PGDH_HUMAN	P15428-3	PGDH_HUMAN	HPGD	145	Homo sapiens		Isoform 3 of 15-hydroxyprostaglandin dehydrogenase [NAD(+)]	0.9999	0.999	2	4	0	4	1	0	0	0	1	2	0	0	0	0	0	0	0	0	0	0	0	0	0	0	0	0	0	0	1	0	0	0	1	2	0	0	0	0	0	0
sp|P15529-16|MCP_HUMAN	P15529-16	MCP_HUMAN	CD46	336	Homo sapiens		Isoform 3 of Membrane cofactor protein	1	0.999	3	34	0	34	3	2	4	3	3	3	0	3	3	3	3	4	0	0	0	0	0	0	0	0	0	0	0	0	3	2	4	3	3	3	0	3	3	3	3	4
sp|P15531-2|NDKA_HUMAN	P15531-2	NDKA_HUMAN	NME1	177	Homo sapiens		Isoform 2 of Nucleoside diphosphate kinase A	1	0.999	9	23	0	346	2	2	1	1	2	2	2	2	2	2	3	2	0	0	0	0	0	0	0	0	0	0	0	0	28	25	16	31	28	20	58	30	27	26	32	25
sp|P15559|NQO1_HUMAN	P15559	NQO1_HUMAN	NQO1	274	Homo sapiens	1:Experimental evidence at protein level	NAD(P)H dehydrogenase [quinone] 1	1	0.999	11	476	476	476	39	62	15	11	45	40	39	39	39	46	48	53	39	62	15	11	45	40	39	39	39	46	48	53	39	62	15	11	45	40	39	39	39	46	48	53
sp|P15586-2|GNS_HUMAN	P15586-2	GNS_HUMAN	GNS	532	Homo sapiens		Isoform 2 of N-acetylglucosamine-6-sulfatase	1	0.999	5	33	0	33	4	4	0	0	6	6	2	2	2	1	3	3	0	0	0	0	0	0	0	0	0	0	0	0	4	4	0	0	6	6	2	2	2	1	3	3
sp|P15880|RS2_HUMAN	P15880	RS2_HUMAN	RPS2	293	Homo sapiens	1:Experimental evidence at protein level	40S ribosomal protein S2	1	0.999	7	126	126	126	12	13	9	8	11	14	6	6	10	15	11	11	12	13	9	8	11	14	6	6	10	15	11	11	12	13	9	8	11	14	6	6	10	15	11	11
sp|P15924|DESP_HUMAN	P15924	DESP_HUMAN	DSP	2871	Homo sapiens	1:Experimental evidence at protein level	Desmoplakin	1	0.999	97	894	101	894	95	105	52	39	119	83	62	52	71	65	84	67	9	10	13	8	14	12	4	2	8	8	7	6	95	105	52	39	119	83	62	52	71	65	84	67
sp|P15927-2|RFA2_HUMAN	P15927-2	RFA2_HUMAN	RPA2	278	Homo sapiens		Isoform 2 of Replication protein A 32 kDa subunit	0.9458	0.999	1	11	0	11	3	0	2	1	0	0	1	0	2	1	1	0	0	0	0	0	0	0	0	0	0	0	0	0	3	0	2	1	0	0	1	0	2	1	1	0
sp|P15941-11|MUC1_HUMAN	P15941-11	MUC1_HUMAN	MUC1	264	Homo sapiens		Isoform Y-LSP of Mucin-1	0.9469	0.999	1	5	0	5	3	1	0	0	1	0	0	0	0	0	0	0	0	0	0	0	0	0	0	0	0	0	0	0	3	1	0	0	1	0	0	0	0	0	0	0
sp|P15954|COX7C_HUMAN	P15954	COX7C_HUMAN	COX7C	63	Homo sapiens	1:Experimental evidence at protein level	Cytochrome c oxidase subunit 7C, mitochondrial	0.9469	0.999	1	10	10	10	1	1	0	0	1	1	0	1	2	1	1	1	1	1	0	0	1	1	0	1	2	1	1	1	1	1	0	0	1	1	0	1	2	1	1	1
sp|P16035|TIMP2_HUMAN	P16035	TIMP2_HUMAN	TIMP2	220	Homo sapiens	1:Experimental evidence at protein level	Metalloproteinase inhibitor 2	0.9469	0.999	1	11	11	11	1	1	2	2	1	1	0	0	0	1	0	2	1	1	2	2	1	1	0	0	0	1	0	2	1	1	2	2	1	1	0	0	0	1	0	2
sp|P16070-10|CD44_HUMAN	P16070-10	CD44_HUMAN	CD44	493	Homo sapiens		Isoform 10 of CD44 antigen	1	0.999	3	40	0	40	4	4	3	1	3	4	1	2	3	5	5	5	0	0	0	0	0	0	0	0	0	0	0	0	4	4	3	1	3	4	1	2	3	5	5	5
sp|P16083|NQO2_HUMAN	P16083	NQO2_HUMAN	NQO2	231	Homo sapiens	1:Experimental evidence at protein level	Ribosyldihydronicotinamide dehydrogenase [quinone]	0.9466	0.999	1	1	1	1	0	0	0	0	0	1	0	0	0	0	0	0	0	0	0	0	0	1	0	0	0	0	0	0	0	0	0	0	0	1	0	0	0	0	0	0
sp|P16104|H2AX_HUMAN	P16104	H2AX_HUMAN	H2AX	143	Homo sapiens	1:Experimental evidence at protein level	Histone H2AX	0.9996	0.999	5	50	12	68	4	2	0	0	3	4	4	4	5	6	11	7	0	0	0	0	1	0	2	1	2	2	3	1	5	4	1	2	4	5	8	6	6	7	12	8
sp|P16144-2|ITB4_HUMAN	P16144-2	ITB4_HUMAN	ITGB4	1752	Homo sapiens		Isoform Beta-4A of Integrin beta-4	1	0.999	47	642	0	642	58	62	36	39	52	47	41	46	60	71	65	65	0	0	0	0	0	0	0	0	0	0	0	0	58	62	36	39	52	47	41	46	60	71	65	65
sp|P16152|CBR1_HUMAN	P16152	CBR1_HUMAN	CBR1	277	Homo sapiens	1:Experimental evidence at protein level	Carbonyl reductase [NADPH] 1	1	0.999	10	104	47	104	10	16	5	5	13	9	6	5	10	5	10	10	5	8	2	2	6	4	4	3	5	2	3	3	10	16	5	5	13	9	6	5	10	5	10	10
sp|P16219|ACADS_HUMAN	P16219	ACADS_HUMAN	ACADS	412	Homo sapiens	1:Experimental evidence at protein level	Short-chain specific acyl-CoA dehydrogenase, mitochondrial	1	0.999	6	80	80	80	10	8	4	4	13	9	4	4	6	4	6	8	10	8	4	4	13	9	4	4	6	4	6	8	10	8	4	4	13	9	4	4	6	4	6	8
sp|P16278-3|BGAL_HUMAN	P16278-3	BGAL_HUMAN	GLB1	647	Homo sapiens		Isoform 3 of Beta-galactosidase	1	0.999	1	23	0	23	3	3	2	1	2	3	0	0	0	3	2	4	0	0	0	0	0	0	0	0	0	0	0	0	3	3	2	1	2	3	0	0	0	3	2	4
sp|P16401|H15_HUMAN	P16401	H15_HUMAN	H1-5	226	Homo sapiens	1:Experimental evidence at protein level	Histone H1.5	1	0.999	5	42	42	42	5	8	5	4	7	2	2	0	1	1	3	4	5	8	5	4	7	2	2	0	1	1	3	4	5	8	5	4	7	2	2	0	1	1	3	4
sp|P16403|H12_HUMAN	P16403	H12_HUMAN	H1-2	213	Homo sapiens	1:Experimental evidence at protein level	Histone H1.2	0.9985	0.999	3	6	6	15	0	0	1	0	0	1	0	0	0	0	1	3	0	0	1	0	0	1	0	0	0	0	1	3	1	2	2	1	2	1	0	0	0	0	2	4
sp|P16422|EPCAM_HUMAN	P16422	EPCAM_HUMAN	EPCAM	314	Homo sapiens	1:Experimental evidence at protein level	Epithelial cell adhesion molecule	1	0.999	9	242	242	242	26	27	15	11	27	18	12	18	21	17	24	26	26	27	15	11	27	18	12	18	21	17	24	26	26	27	15	11	27	18	12	18	21	17	24	26
sp|P16435|NCPR_HUMAN	P16435	NCPR_HUMAN	POR	677	Homo sapiens	1:Experimental evidence at protein level	NADPH--cytochrome P450 reductase	1	0.999	11	65	65	65	4	5	6	5	8	8	3	6	4	5	7	4	4	5	6	5	8	8	3	6	4	5	7	4	4	5	6	5	8	8	3	6	4	5	7	4
sp|P16455|MGMT_HUMAN	P16455	MGMT_HUMAN	MGMT	207	Homo sapiens	1:Experimental evidence at protein level	Methylated-DNA--protein-cysteine methyltransferase	1	0.999	3	21	21	21	2	2	1	1	1	1	3	1	3	3	2	1	2	2	1	1	1	1	3	1	3	3	2	1	2	2	1	1	1	1	3	1	3	3	2	1
sp|P16499|PDE6A_HUMAN	P16499	PDE6A_HUMAN	PDE6A	860	Homo sapiens	1:Experimental evidence at protein level	Rod cGMP-specific 3',5'-cyclic phosphodiesterase subunit alpha	0.9982	0.9958	2	15	15	15	1	1	3	0	2	1	1	2	1	1	1	1	1	1	3	0	2	1	1	2	1	1	1	1	1	1	3	0	2	1	1	2	1	1	1	1
sp|P16615|AT2A2_HUMAN	P16615	AT2A2_HUMAN	ATP2A2	1042	Homo sapiens	1:Experimental evidence at protein level	Sarcoplasmic/endoplasmic reticulum calcium ATPase 2	1	0.999	24	307	0	307	29	34	27	22	37	24	16	19	23	26	26	24	0	0	0	0	0	0	0	0	0	0	0	0	29	34	27	22	37	24	16	19	23	26	26	24
sp|P16885|PLCG2_HUMAN	P16885	PLCG2_HUMAN	PLCG2	1265	Homo sapiens	1:Experimental evidence at protein level	1-phosphatidylinositol 4,5-bisphosphate phosphodiesterase gamma-2	0.9979	0.999	1	1	1	1	0	0	1	0	0	0	0	0	0	0	0	0	0	0	1	0	0	0	0	0	0	0	0	0	0	0	1	0	0	0	0	0	0	0	0	0
sp|P16930|FAAA_HUMAN	P16930	FAAA_HUMAN	FAH	419	Homo sapiens	1:Experimental evidence at protein level	Fumarylacetoacetase	1	0.999	5	18	2	18	1	0	4	1	3	3	0	1	1	1	1	2	0	0	0	0	0	0	0	0	0	0	1	1	1	0	4	1	3	3	0	1	1	1	1	2
sp|P16949|STMN1_HUMAN	P16949	STMN1_HUMAN	STMN1	149	Homo sapiens	1:Experimental evidence at protein level	Stathmin	1	0.999	11	101	63	101	6	3	3	3	8	4	11	9	12	14	12	16	4	1	3	3	5	2	9	5	8	9	6	8	6	3	3	3	8	4	11	9	12	14	12	16
sp|P16989-2|YBOX3_HUMAN	P16989-2	YBOX3_HUMAN	YBX3	303	Homo sapiens		Isoform 2 of Y-box-binding protein 3	0.9999	0.999	8	13	13	165	2	1	0	0	2	2	0	2	1	1	1	1	2	1	0	0	2	2	0	2	1	1	1	1	13	11	11	24	18	14	9	12	12	11	13	17
sp|P16989-3|YBOX3_HUMAN	P16989-3	YBOX3_HUMAN	YBX3	342	Homo sapiens		Isoform 3 of Y-box-binding protein 3	1	0.999	8	48	0	153	3	2	3	13	6	2	4	3	3	4	1	4	0	0	0	0	0	0	0	0	0	0	0	0	11	10	11	24	16	12	9	10	11	10	12	17
sp|P17028|ZNF24_HUMAN	P17028	ZNF24_HUMAN	ZNF24	368	Homo sapiens	1:Experimental evidence at protein level	Zinc finger protein 24	0.9994	0.9955	2	6	6	6	0	0	4	1	0	0	0	1	0	0	0	0	0	0	4	1	0	0	0	1	0	0	0	0	0	0	4	1	0	0	0	1	0	0	0	0
sp|P17029|ZKSC1_HUMAN	P17029	ZKSC1_HUMAN	ZKSCAN1	563	Homo sapiens	1:Experimental evidence at protein level	Zinc finger protein with KRAB and SCAN domains 1	0.9997	0.9984	2	5	5	5	0	0	3	2	0	0	0	0	0	0	0	0	0	0	3	2	0	0	0	0	0	0	0	0	0	0	3	2	0	0	0	0	0	0	0	0
sp|P17050|NAGAB_HUMAN	P17050	NAGAB_HUMAN	NAGA	411	Homo sapiens	1:Experimental evidence at protein level	Alpha-N-acetylgalactosaminidase	0.9469	0.999	1	7	7	7	2	1	0	0	2	0	0	0	0	0	0	2	2	1	0	0	2	0	0	0	0	0	0	2	2	1	0	0	2	0	0	0	0	0	0	2
sp|P17096-2|HMGA1_HUMAN	P17096-2	HMGA1_HUMAN	HMGA1	96	Homo sapiens		Isoform HMG-Y of High mobility group protein HMG-I/HMG-Y	1	0.999	3	47	47	70	7	5	3	2	4	6	3	2	2	3	4	6	7	5	3	2	4	6	3	2	2	3	4	6	8	5	5	5	6	9	4	5	3	6	5	9
sp|P17096|HMGA1_HUMAN	P17096	HMGA1_HUMAN	HMGA1	107	Homo sapiens	1:Experimental evidence at protein level	High mobility group protein HMG-I/HMG-Y	1	0.999	4	121	0	121	9	8	9	9	13	11	10	14	6	10	10	12	0	0	0	0	0	0	0	0	0	0	0	0	9	8	9	9	13	11	10	14	6	10	10	12
sp|P17174|AATC_HUMAN	P17174	AATC_HUMAN	GOT1	413	Homo sapiens	1:Experimental evidence at protein level	Aspartate aminotransferase, cytoplasmic	1	0.999	8	130	16	130	10	12	8	10	16	9	7	8	11	8	17	14	1	2	0	0	2	1	1	0	2	2	3	2	10	12	8	10	16	9	7	8	11	8	17	14
sp|P17252|KPCA_HUMAN	P17252	KPCA_HUMAN	PRKCA	672	Homo sapiens	1:Experimental evidence at protein level	Protein kinase C alpha type	0.9962	0.999	2	5	5	11	0	0	1	1	1	1	0	0	0	0	0	1	0	0	1	1	1	1	0	0	0	0	0	1	0	0	1	1	2	1	0	0	0	1	3	2
sp|P17275|JUNB_HUMAN	P17275	JUNB_HUMAN	JUNB	347	Homo sapiens	1:Experimental evidence at protein level	Transcription factor JunB	0.846	0.9968	1	5	5	5	0	0	0	0	0	2	0	0	1	2	0	0	0	0	0	0	0	2	0	0	1	2	0	0	0	0	0	0	0	2	0	0	1	2	0	0
sp|P17301|ITA2_HUMAN	P17301	ITA2_HUMAN	ITGA2	1181	Homo sapiens	1:Experimental evidence at protein level	Integrin alpha-2	1	0.999	12	141	141	141	19	22	8	12	21	20	5	4	6	6	11	7	19	22	8	12	21	20	5	4	6	6	11	7	19	22	8	12	21	20	5	4	6	6	11	7
sp|P17480-2|UBF1_HUMAN	P17480-2	UBF1_HUMAN	UBTF	727	Homo sapiens		Isoform UBF2 of Nucleolar transcription factor 1	1	0.999	3	24	0	24	4	5	2	1	3	0	0	1	1	2	3	2	0	0	0	0	0	0	0	0	0	0	0	0	4	5	2	1	3	0	0	1	1	2	3	2
sp|P17509|HXB6_HUMAN	P17509	HXB6_HUMAN	HOXB6	224	Homo sapiens	1:Experimental evidence at protein level	Homeobox protein Hox-B6	0.9344	0.9987	1	3	3	3	0	0	0	0	0	0	0	0	0	1	0	2	0	0	0	0	0	0	0	0	0	1	0	2	0	0	0	0	0	0	0	0	0	1	0	2
sp|P17568|NDUB7_HUMAN	P17568	NDUB7_HUMAN	NDUFB7	137	Homo sapiens	1:Experimental evidence at protein level	NADH dehydrogenase [ubiquinone] 1 beta subcomplex subunit 7	1	0.999	3	34	34	34	3	5	4	4	3	3	2	1	2	1	3	3	3	5	4	4	3	3	2	1	2	1	3	3	3	5	4	4	3	3	2	1	2	1	3	3
sp|P17612-2|KAPCA_HUMAN	P17612-2	KAPCA_HUMAN	PRKACA	343	Homo sapiens		Isoform 2 of cAMP-dependent protein kinase catalytic subunit alpha	1	0.999	5	54	0	54	4	5	3	4	4	3	4	5	6	7	4	5	0	0	0	0	0	0	0	0	0	0	0	0	4	5	3	4	4	3	4	5	6	7	4	5
sp|P17655|CAN2_HUMAN	P17655	CAN2_HUMAN	CAPN2	700	Homo sapiens	1:Experimental evidence at protein level	Calpain-2 catalytic subunit	1	0.999	17	190	42	190	24	22	12	8	25	25	9	7	12	15	18	13	5	5	0	0	5	5	5	1	2	6	7	1	24	22	12	8	25	25	9	7	12	15	18	13
sp|P17676-2|CEBPB_HUMAN	P17676-2	CEBPB_HUMAN	CEBPB	322	Homo sapiens		Isoform 2 of CCAAT/enhancer-binding protein beta	0.9469	0.999	1	3	0	3	0	0	0	0	0	0	1	0	0	0	1	1	0	0	0	0	0	0	0	0	0	0	0	0	0	0	0	0	0	0	1	0	0	0	1	1
sp|P17706-2|PTN2_HUMAN	P17706-2	PTN2_HUMAN	PTPN2	387	Homo sapiens		Isoform 2 of Tyrosine-protein phosphatase non-receptor type 2	0.9469	0.999	1	11	0	11	1	0	0	1	1	1	1	1	1	2	1	1	0	0	0	0	0	0	0	0	0	0	0	0	1	0	0	1	1	1	1	1	1	2	1	1
sp|P17812|PYRG1_HUMAN	P17812	PYRG1_HUMAN	CTPS1	591	Homo sapiens	1:Experimental evidence at protein level	CTP synthase 1	1	0.999	9	81	9	81	3	7	6	6	8	7	4	8	7	7	12	6	0	0	0	0	2	0	0	2	1	2	2	0	3	7	6	6	8	7	4	8	7	7	12	6
sp|P17844|DDX5_HUMAN	P17844	DDX5_HUMAN	DDX5	614	Homo sapiens	1:Experimental evidence at protein level	Probable ATP-dependent RNA helicase DDX5	1	0.999	17	121	35	171	7	3	14	8	10	9	12	11	7	10	17	13	4	0	4	4	4	4	4	0	0	1	6	4	10	7	18	11	14	12	16	16	14	15	22	16
sp|P17858|PFKAL_HUMAN	P17858	PFKAL_HUMAN	PFKL	780	Homo sapiens	1:Experimental evidence at protein level	ATP-dependent 6-phosphofructokinase, liver type	1	0.999	14	297	0	297	28	30	15	18	29	27	24	26	29	20	25	26	0	0	0	0	0	0	0	0	0	0	0	0	28	30	15	18	29	27	24	26	29	20	25	26
sp|P17931|LEG3_HUMAN	P17931	LEG3_HUMAN	LGALS3	250	Homo sapiens	1:Experimental evidence at protein level	Galectin-3	1	0.999	7	141	141	141	11	11	23	27	13	14	8	7	6	6	8	7	11	11	23	27	13	14	8	7	6	6	8	7	11	11	23	27	13	14	8	7	6	6	8	7
sp|P17980|PRS6A_HUMAN	P17980	PRS6A_HUMAN	PSMC3	439	Homo sapiens	1:Experimental evidence at protein level	26S proteasome regulatory subunit 6A	1	0.999	12	104	104	104	13	17	1	1	8	5	9	6	14	12	8	10	13	17	1	1	8	5	9	6	14	12	8	10	13	17	1	1	8	5	9	6	14	12	8	10
sp|P17987|TCPA_HUMAN	P17987	TCPA_HUMAN	TCP1	556	Homo sapiens	1:Experimental evidence at protein level	T-complex protein 1 subunit alpha	1	0.999	17	237	237	237	17	25	18	19	26	22	18	13	24	16	22	17	17	25	18	19	26	22	18	13	24	16	22	17	17	25	18	19	26	22	18	13	24	16	22	17
sp|P18031|PTN1_HUMAN	P18031	PTN1_HUMAN	PTPN1	435	Homo sapiens	1:Experimental evidence at protein level	Tyrosine-protein phosphatase non-receptor type 1	1	0.999	8	97	97	97	12	9	5	3	9	9	5	5	11	11	7	11	12	9	5	3	9	9	5	5	11	11	7	11	12	9	5	3	9	9	5	5	11	11	7	11
sp|P18065|IBP2_HUMAN	P18065	IBP2_HUMAN	IGFBP2	325	Homo sapiens	1:Experimental evidence at protein level	Insulin-like growth factor-binding protein 2	0.9469	0.999	1	12	12	12	0	0	0	0	0	0	0	1	3	1	3	4	0	0	0	0	0	0	0	1	3	1	3	4	0	0	0	0	0	0	0	1	3	1	3	4
sp|P18077|RL35A_HUMAN	P18077	RL35A_HUMAN	RPL35A	110	Homo sapiens	1:Experimental evidence at protein level	60S ribosomal protein L35a	1	0.999	3	47	47	47	4	5	4	3	3	7	2	2	5	5	4	3	4	5	4	3	3	7	2	2	5	5	4	3	4	5	4	3	3	7	2	2	5	5	4	3
sp|P18084|ITB5_HUMAN	P18084	ITB5_HUMAN	ITGB5	799	Homo sapiens	1:Experimental evidence at protein level	Integrin beta-5	1	0.999	6	19	19	19	1	1	2	3	2	3	0	1	1	1	3	1	1	1	2	3	2	3	0	1	1	1	3	1	1	1	2	3	2	3	0	1	1	1	3	1
sp|P18085|ARF4_HUMAN	P18085	ARF4_HUMAN	ARF4	180	Homo sapiens	1:Experimental evidence at protein level	ADP-ribosylation factor 4	0.9996	0.999	4	21	21	417	3	3	0	0	2	1	3	0	3	2	2	2	3	3	0	0	2	1	3	0	3	2	2	2	28	23	49	54	31	35	27	37	32	38	34	29
sp|P18124|RL7_HUMAN	P18124	RL7_HUMAN	RPL7	248	Homo sapiens	1:Experimental evidence at protein level	60S ribosomal protein L7	1	0.999	7	220	220	220	10	16	26	30	22	28	16	15	13	10	17	17	10	16	26	30	22	28	16	15	13	10	17	17	10	16	26	30	22	28	16	15	13	10	17	17
sp|P18206-2|VINC_HUMAN	P18206-2	VINC_HUMAN	VCL	1066	Homo sapiens		Isoform 1 of Vinculin	1	0.999	29	343	0	343	46	40	18	21	42	27	15	27	33	20	24	30	0	0	0	0	0	0	0	0	0	0	0	0	46	40	18	21	42	27	15	27	33	20	24	30
sp|P18283|GPX2_HUMAN	P18283	GPX2_HUMAN	GPX2	190	Homo sapiens	1:Experimental evidence at protein level	Glutathione peroxidase 2	1	0.999	7	111	111	111	7	10	7	8	14	4	11	10	10	9	11	10	7	10	7	8	14	4	11	10	10	9	11	10	7	10	7	8	14	4	11	10	10	9	11	10
sp|P18440|ARY1_HUMAN	P18440	ARY1_HUMAN	NAT1	290	Homo sapiens	1:Experimental evidence at protein level	Arylamine N-acetyltransferase 1	1	0.999	2	8	8	8	0	1	2	1	2	1	0	0	0	0	0	1	0	1	2	1	2	1	0	0	0	0	0	1	0	1	2	1	2	1	0	0	0	0	0	1
sp|P18510-2|IL1RA_HUMAN	P18510-2	IL1RA_HUMAN	IL1RN	159	Homo sapiens		Isoform 2 of Interleukin-1 receptor antagonist protein	1	0.999	3	15	8	15	2	2	3	1	5	2	0	0	0	0	0	0	1	1	2	1	1	2	0	0	0	0	0	0	2	2	3	1	5	2	0	0	0	0	0	0
sp|P18564|ITB6_HUMAN	P18564	ITB6_HUMAN	ITGB6	788	Homo sapiens	1:Experimental evidence at protein level	Integrin beta-6	1	0.999	5	10	6	10	0	0	1	2	1	1	0	0	0	3	2	0	0	0	0	1	1	0	0	0	0	3	1	0	0	0	1	2	1	1	0	0	0	3	2	0
sp|P18583-10|SON_HUMAN	P18583-10	SON_HUMAN	SON	2282	Homo sapiens		Isoform J of Protein SON	1	0.999	4	33	0	33	2	5	5	4	0	0	2	4	3	2	4	2	0	0	0	0	0	0	0	0	0	0	0	0	2	5	5	4	0	0	2	4	3	2	4	2
sp|P18615-3|NELFE_HUMAN	P18615-3	NELFE_HUMAN	NELFE	387	Homo sapiens		Isoform 2 of Negative elongation factor E	1	0.999	2	22	0	22	2	1	0	0	1	2	0	3	2	5	2	4	0	0	0	0	0	0	0	0	0	0	0	0	2	1	0	0	1	2	0	3	2	5	2	4
sp|P18621-2|RL17_HUMAN	P18621-2	RL17_HUMAN	RPL17	146	Homo sapiens		Isoform 2 of 60S ribosomal protein L17	1	0.999	6	148	0	148	9	10	19	19	20	15	4	9	9	9	11	14	0	0	0	0	0	0	0	0	0	0	0	0	9	10	19	19	20	15	4	9	9	9	11	14
sp|P18669|PGAM1_HUMAN	P18669	PGAM1_HUMAN	PGAM1	254	Homo sapiens	1:Experimental evidence at protein level	Phosphoglycerate mutase 1	1	0.999	16	501	297	501	57	54	32	33	47	50	32	32	37	42	42	43	33	28	22	19	26	29	18	18	24	24	27	29	57	54	32	33	47	50	32	32	37	42	42	43
sp|P18754-2|RCC1_HUMAN	P18754-2	RCC1_HUMAN	RCC1	452	Homo sapiens		Isoform 2 of Regulator of chromosome condensation	1	0.999	8	131	0	131	7	12	12	9	10	9	10	12	12	12	13	13	0	0	0	0	0	0	0	0	0	0	0	0	7	12	12	9	10	9	10	12	12	12	13	13
sp|P18827|SDC1_HUMAN	P18827	SDC1_HUMAN	SDC1	310	Homo sapiens	1:Experimental evidence at protein level	Syndecan-1	0.9469	0.999	1	3	3	3	1	0	0	0	1	0	0	0	0	0	1	0	1	0	0	0	1	0	0	0	0	0	1	0	1	0	0	0	1	0	0	0	0	0	1	0
sp|P18859-2|ATP5J_HUMAN	P18859-2	ATP5J_HUMAN	ATP5PF	116	Homo sapiens		Isoform 2 of ATP synthase-coupling factor 6, mitochondrial	1	0.999	3	45	0	45	5	3	1	0	8	5	2	4	4	4	4	5	0	0	0	0	0	0	0	0	0	0	0	0	5	3	1	0	8	5	2	4	4	4	4	5
sp|P18887|XRCC1_HUMAN	P18887	XRCC1_HUMAN	XRCC1	633	Homo sapiens	1:Experimental evidence at protein level	DNA repair protein XRCC1	1	0.999	4	17	17	17	0	0	3	1	0	2	0	2	1	4	1	3	0	0	3	1	0	2	0	2	1	4	1	3	0	0	3	1	0	2	0	2	1	4	1	3
sp|P19075|TSN8_HUMAN	P19075	TSN8_HUMAN	TSPAN8	237	Homo sapiens	1:Experimental evidence at protein level	Tetraspanin-8	1	0.999	2	15	15	15	2	2	2	1	2	3	0	1	0	0	1	1	2	2	2	1	2	3	0	1	0	0	1	1	2	2	2	1	2	3	0	1	0	0	1	1
sp|P19338|NUCL_HUMAN	P19338	NUCL_HUMAN	NCL	710	Homo sapiens	1:Experimental evidence at protein level	Nucleolin	1	0.999	20	647	647	647	41	44	11	10	37	39	83	62	79	76	84	81	41	44	11	10	37	39	83	62	79	76	84	81	41	44	11	10	37	39	83	62	79	76	84	81
sp|P19367|HXK1_HUMAN	P19367	HXK1_HUMAN	HK1	917	Homo sapiens	1:Experimental evidence at protein level	Hexokinase-1	1	0.999	9	55	7	55	8	5	6	3	6	9	2	3	4	3	2	4	0	0	2	0	1	1	0	1	1	1	0	0	8	5	6	3	6	9	2	3	4	3	2	4
sp|P19387|RPB3_HUMAN	P19387	RPB3_HUMAN	POLR2C	275	Homo sapiens	1:Experimental evidence at protein level	DNA-directed RNA polymerase II subunit RPB3	1	0.999	2	7	7	7	1	0	0	0	1	0	0	1	2	0	1	1	1	0	0	0	1	0	0	1	2	0	1	1	1	0	0	0	1	0	0	1	2	0	1	1
sp|P19388|RPAB1_HUMAN	P19388	RPAB1_HUMAN	POLR2E	210	Homo sapiens	1:Experimental evidence at protein level	DNA-directed RNA polymerases I, II, and III subunit RPABC1	1	0.999	2	9	9	9	0	0	1	3	0	0	2	0	0	0	1	2	0	0	1	3	0	0	2	0	0	0	1	2	0	0	1	3	0	0	2	0	0	0	1	2
sp|P19404|NDUV2_HUMAN	P19404	NDUV2_HUMAN	NDUFV2	249	Homo sapiens	1:Experimental evidence at protein level	NADH dehydrogenase [ubiquinone] flavoprotein 2, mitochondrial	1	0.999	2	13	13	13	3	1	0	0	2	3	0	0	1	2	0	1	3	1	0	0	2	3	0	0	1	2	0	1	3	1	0	0	2	3	0	0	1	2	0	1
sp|P19525-2|E2AK2_HUMAN	P19525-2	E2AK2_HUMAN	EIF2AK2	510	Homo sapiens		Isoform 2 of Interferon-induced, double-stranded RNA-activated protein kinase	1	0.999	5	31	0	31	0	0	1	0	1	0	6	3	5	5	4	6	0	0	0	0	0	0	0	0	0	0	0	0	0	0	1	0	1	0	6	3	5	5	4	6
sp|P19623|SPEE_HUMAN	P19623	SPEE_HUMAN	SRM	302	Homo sapiens	1:Experimental evidence at protein level	Spermidine synthase	0.9463	0.999	1	11	11	11	1	1	0	0	2	1	1	1	1	1	1	1	1	1	0	0	2	1	1	1	1	1	1	1	1	1	0	0	2	1	1	1	1	1	1	1
sp|P19784|CSK22_HUMAN	P19784	CSK22_HUMAN	CSNK2A2	350	Homo sapiens	1:Experimental evidence at protein level	Casein kinase II subunit alpha'	1	0.999	6	25	25	25	2	3	3	1	2	3	2	1	3	1	2	2	2	3	3	1	2	3	2	1	3	1	2	2	2	3	3	1	2	3	2	1	3	1	2	2
sp|P19801-2|AOC1_HUMAN	P19801-2	AOC1_HUMAN	AOC1	770	Homo sapiens		Isoform 2 of Amiloride-sensitive amine oxidase [copper-containing]	1	0.999	3	7	0	7	0	0	3	4	0	0	0	0	0	0	0	0	0	0	0	0	0	0	0	0	0	0	0	0	0	0	3	4	0	0	0	0	0	0	0	0
sp|P19838-2|NFKB1_HUMAN	P19838-2	NFKB1_HUMAN	NFKB1	969	Homo sapiens		Isoform 2 of Nuclear factor NF-kappa-B p105 subunit	1	0.999	6	66	0	66	6	5	4	5	5	5	3	6	8	5	9	5	0	0	0	0	0	0	0	0	0	0	0	0	6	5	4	5	5	5	3	6	8	5	9	5
sp|P20020-1|AT2B1_HUMAN	P20020-1	AT2B1_HUMAN	ATP2B1	1258	Homo sapiens		Isoform D of Plasma membrane calcium-transporting ATPase 1	1	0.999	11	90	0	90	10	11	12	6	7	7	2	5	5	9	10	6	0	0	0	0	0	0	0	0	0	0	0	0	10	11	12	6	7	7	2	5	5	9	10	6
sp|P20042|IF2B_HUMAN	P20042	IF2B_HUMAN	EIF2S2	333	Homo sapiens	1:Experimental evidence at protein level	Eukaryotic translation initiation factor 2 subunit 2	1	0.999	5	47	47	47	5	4	1	1	5	7	4	4	4	4	3	5	5	4	1	1	5	7	4	4	4	4	3	5	5	4	1	1	5	7	4	4	4	4	3	5
sp|P20073-2|ANXA7_HUMAN	P20073-2	ANXA7_HUMAN	ANXA7	466	Homo sapiens		Isoform 2 of Annexin A7	1	0.999	8	71	0	71	3	7	8	7	8	3	3	9	7	5	3	8	0	0	0	0	0	0	0	0	0	0	0	0	3	7	8	7	8	3	3	9	7	5	3	8
sp|P20290-2|BTF3_HUMAN	P20290-2	BTF3_HUMAN	BTF3	162	Homo sapiens		Isoform 2 of Transcription factor BTF3	1	0.999	4	69	3	69	11	9	2	4	7	2	6	5	5	6	8	4	0	0	0	1	0	0	0	0	1	0	1	0	11	9	2	4	7	2	6	5	5	6	8	4
sp|P20337|RAB3B_HUMAN	P20337	RAB3B_HUMAN	RAB3B	219	Homo sapiens	1:Experimental evidence at protein level	Ras-related protein Rab-3B	1	0.999	3	6	6	9	2	3	0	0	0	1	0	0	0	0	0	0	2	3	0	0	0	1	0	0	0	0	0	0	4	4	0	0	0	1	0	0	0	0	0	0
sp|P20338|RAB4A_HUMAN	P20338	RAB4A_HUMAN	RAB4A	218	Homo sapiens	1:Experimental evidence at protein level	Ras-related protein Rab-4A	1	0.999	3	12	12	12	1	2	2	2	1	2	0	0	0	1	1	0	1	2	2	2	1	2	0	0	0	1	1	0	1	2	2	2	1	2	0	0	0	1	1	0
sp|P20339-2|RAB5A_HUMAN	P20339-2	RAB5A_HUMAN	RAB5A	201	Homo sapiens		Isoform 2 of Ras-related protein Rab-5A	1	0.999	5	6	0	8	0	3	0	0	0	0	1	0	0	2	0	0	0	0	0	0	0	0	0	0	0	0	0	0	0	3	0	0	0	0	1	0	0	4	0	0
sp|P20340-2|RAB6A_HUMAN	P20340-2	RAB6A_HUMAN	RAB6A	208	Homo sapiens		Isoform 2 of Ras-related protein Rab-6A	1	0.999	6	44	0	44	4	4	3	3	6	4	3	3	3	5	4	2	0	0	0	0	0	0	0	0	0	0	0	0	4	4	3	3	6	4	3	3	3	5	4	2
sp|P20585|MSH3_HUMAN	P20585	MSH3_HUMAN	MSH3	1137	Homo sapiens	1:Experimental evidence at protein level	DNA mismatch repair protein Msh3	0.9983	0.999	1	4	4	4	0	0	1	3	0	0	0	0	0	0	0	0	0	0	1	3	0	0	0	0	0	0	0	0	0	0	1	3	0	0	0	0	0	0	0	0
sp|P20618|PSB1_HUMAN	P20618	PSB1_HUMAN	PSMB1	241	Homo sapiens	1:Experimental evidence at protein level	Proteasome subunit beta type-1	1	0.999	4	66	66	66	7	7	4	5	4	5	5	6	7	6	5	5	7	7	4	5	4	5	5	6	7	6	5	5	7	7	4	5	4	5	5	6	7	6	5	5
sp|P20645|MPRD_HUMAN	P20645	MPRD_HUMAN	M6PR	277	Homo sapiens	1:Experimental evidence at protein level	Cation-dependent mannose-6-phosphate receptor	1	0.999	3	23	23	23	1	1	1	2	2	2	1	2	1	1	6	3	1	1	1	2	2	2	1	2	1	1	6	3	1	1	1	2	2	2	1	2	1	1	6	3
sp|P20671|H2A1D_HUMAN	P20671	H2A1D_HUMAN	H2AC7	130	Homo sapiens	1:Experimental evidence at protein level	Histone H2A type 1-D	0.9995	0.999	6	635	0	653	63	53	49	6	77	53	57	41	62	60	55	59	0	0	0	0	0	0	0	0	0	0	0	0	65	56	50	8	78	54	59	43	63	61	56	60
sp|P20674|COX5A_HUMAN	P20674	COX5A_HUMAN	COX5A	150	Homo sapiens	1:Experimental evidence at protein level	Cytochrome c oxidase subunit 5A, mitochondrial	1	0.999	5	60	60	60	4	5	6	4	6	6	3	5	4	5	6	6	4	5	6	4	6	6	3	5	4	5	6	6	4	5	6	4	6	6	3	5	4	5	6	6
sp|P20700|LMNB1_HUMAN	P20700	LMNB1_HUMAN	LMNB1	586	Homo sapiens	1:Experimental evidence at protein level	Lamin-B1	1	0.999	23	350	317	350	32	33	18	19	27	23	25	22	35	35	43	38	30	30	16	17	23	20	23	19	32	33	39	35	32	33	18	19	27	23	25	22	35	35	43	38
sp|P20810-10|ICAL_HUMAN	P20810-10	ICAL_HUMAN	CAST	769	Homo sapiens		Isoform 10 of Calpastatin	1	0.999	30	495	0	495	41	44	55	63	50	61	25	33	39	33	24	27	0	0	0	0	0	0	0	0	0	0	0	0	41	44	55	63	50	61	25	33	39	33	24	27
sp|P20810-3|ICAL_HUMAN	P20810-3	ICAL_HUMAN	CAST	590	Homo sapiens		Isoform 3 of Calpastatin	1	0.999	25	4	4	335	0	0	3	1	0	0	0	0	0	0	0	0	0	0	3	1	0	0	0	0	0	0	0	0	28	33	41	38	36	36	14	23	29	21	18	18
sp|P20823-2|HNF1A_HUMAN	P20823-2	HNF1A_HUMAN	HNF1A	572	Homo sapiens		Isoform B of Hepatocyte nuclear factor 1-alpha	0.9469	0.999	1	8	0	8	0	0	0	0	0	0	0	2	1	2	1	2	0	0	0	0	0	0	0	0	0	0	0	0	0	0	0	0	0	0	0	2	1	2	1	2
sp|P20839-2|IMDH1_HUMAN	P20839-2	IMDH1_HUMAN	IMPDH1	489	Homo sapiens		Isoform 2 of Inosine-5'-monophosphate dehydrogenase 1	0.9458	0.999	1	1	0	1	0	0	1	0	0	0	0	0	0	0	0	0	0	0	0	0	0	0	0	0	0	0	0	0	0	0	1	0	0	0	0	0	0	0	0	0
sp|P20936-2|RASA1_HUMAN	P20936-2	RASA1_HUMAN	RASA1	870	Homo sapiens		Isoform 2 of Ras GTPase-activating protein 1	1	0.999	3	11	0	11	0	0	2	1	2	1	0	1	0	1	2	1	0	0	0	0	0	0	0	0	0	0	0	0	0	0	2	1	2	1	0	1	0	1	2	1
sp|P20962|PTMS_HUMAN	P20962	PTMS_HUMAN	PTMS	102	Homo sapiens	1:Experimental evidence at protein level	Parathymosin	1	0.999	2	34	34	34	3	3	3	2	4	2	3	3	2	3	4	2	3	3	3	2	4	2	3	3	2	3	4	2	3	3	3	2	4	2	3	3	2	3	4	2
sp|P21127-2|CD11B_HUMAN	P21127-2	CD11B_HUMAN	CDK11B	782	Homo sapiens		Isoform SV1 of Cyclin-dependent kinase 11B	1	0.999	6	29	0	29	1	2	4	4	2	2	2	2	2	2	3	3	0	0	0	0	0	0	0	0	0	0	0	0	1	2	4	4	2	2	2	2	2	2	3	3
sp|P21266|GSTM3_HUMAN	P21266	GSTM3_HUMAN	GSTM3	225	Homo sapiens	1:Experimental evidence at protein level	Glutathione S-transferase Mu 3	1	0.999	7	61	61	61	6	5	6	3	5	8	5	6	4	6	3	4	6	5	6	3	5	8	5	6	4	6	3	4	6	5	6	3	5	8	5	6	4	6	3	4
sp|P21281|VATB2_HUMAN	P21281	VATB2_HUMAN	ATP6V1B2	511	Homo sapiens	1:Experimental evidence at protein level	V-type proton ATPase subunit B, brain isoform	1	0.999	6	35	34	35	4	1	1	1	2	2	2	4	5	3	8	2	4	1	1	1	1	2	2	4	5	3	8	2	4	1	1	1	2	2	2	4	5	3	8	2
sp|P21283|VATC1_HUMAN	P21283	VATC1_HUMAN	ATP6V1C1	382	Homo sapiens	1:Experimental evidence at protein level	V-type proton ATPase subunit C 1	1	0.999	2	10	10	10	1	1	1	0	3	1	0	1	1	0	1	0	1	1	1	0	3	1	0	1	1	0	1	0	1	1	1	0	3	1	0	1	1	0	1	0
sp|P21291|CSRP1_HUMAN	P21291	CSRP1_HUMAN	CSRP1	193	Homo sapiens	1:Experimental evidence at protein level	Cysteine and glycine-rich protein 1	1	0.999	9	164	164	164	10	14	16	11	11	13	15	15	18	16	13	12	10	14	16	11	11	13	15	15	18	16	13	12	10	14	16	11	11	13	15	15	18	16	13	12
sp|P21333-2|FLNA_HUMAN	P21333-2	FLNA_HUMAN	FLNA	2639	Homo sapiens		Isoform 2 of Filamin-A	1	0.999	72	1178	0	1247	98	100	47	53	91	76	103	95	135	120	124	136	0	0	0	0	0	0	0	0	0	0	0	0	104	107	49	57	101	82	108	99	141	126	131	142
sp|P21359-2|NF1_HUMAN	P21359-2	NF1_HUMAN	NF1	2818	Homo sapiens		Isoform I of Neurofibromin	1	0.9919	4	5	0	5	1	0	0	0	0	0	0	1	0	1	2	0	0	0	0	0	0	0	0	0	0	0	0	0	1	0	0	0	0	0	0	1	0	1	2	0
sp|P21397-2|AOFA_HUMAN	P21397-2	AOFA_HUMAN	MAOA	394	Homo sapiens		Isoform 2 of Amine oxidase [flavin-containing] A	1	0.999	5	51	0	51	5	9	9	4	8	8	0	0	4	2	1	1	0	0	0	0	0	0	0	0	0	0	0	0	5	9	9	4	8	8	0	0	4	2	1	1
sp|P21399|ACOHC_HUMAN	P21399	ACOHC_HUMAN	ACO1	889	Homo sapiens	1:Experimental evidence at protein level	Cytoplasmic aconitate hydratase	1	0.999	14	153	153	153	19	15	13	12	16	19	8	7	13	9	11	11	19	15	13	12	16	19	8	7	13	9	11	11	19	15	13	12	16	19	8	7	13	9	11	11
sp|P21589|5NTD_HUMAN	P21589	5NTD_HUMAN	NT5E	574	Homo sapiens	1:Experimental evidence at protein level	5'-nucleotidase	1	0.999	14	120	15	120	10	12	6	4	19	18	6	6	14	7	10	8	1	3	1	0	2	1	1	1	2	1	1	1	10	12	6	4	19	18	6	6	14	7	10	8
sp|P21695-2|GPDA_HUMAN	P21695-2	GPDA_HUMAN	GPD1	326	Homo sapiens		Isoform 2 of Glycerol-3-phosphate dehydrogenase [NAD(+)], cytoplasmic	0.8041	0.9957	1	1	0	1	0	0	1	0	0	0	0	0	0	0	0	0	0	0	0	0	0	0	0	0	0	0	0	0	0	0	1	0	0	0	0	0	0	0	0	0
sp|P21796|VDAC1_HUMAN	P21796	VDAC1_HUMAN	VDAC1	283	Homo sapiens	1:Experimental evidence at protein level	Voltage-dependent anion-selective channel protein 1	1	0.999	13	766	766	766	99	75	32	28	98	58	59	56	70	45	73	73	99	75	32	28	98	58	59	56	70	45	73	73	99	75	32	28	98	58	59	56	70	45	73	73
sp|P21860-4|ERBB3_HUMAN	P21860-4	ERBB3_HUMAN	ERBB3	1283	Homo sapiens		Isoform 4 of Receptor tyrosine-protein kinase erbB-3	1	0.999	3	4	0	4	1	0	0	0	1	0	0	0	0	1	1	0	0	0	0	0	0	0	0	0	0	0	0	0	1	0	0	0	1	0	0	0	0	1	1	0
sp|P21912|SDHB_HUMAN	P21912	SDHB_HUMAN	SDHB	280	Homo sapiens	1:Experimental evidence at protein level	Succinate dehydrogenase [ubiquinone] iron-sulfur subunit, mitochondrial	1	0.999	8	165	165	165	16	16	10	4	19	20	8	21	10	12	13	16	16	16	10	4	19	20	8	21	10	12	13	16	16	16	10	4	19	20	8	21	10	12	13	16
sp|P21926|CD9_HUMAN	P21926	CD9_HUMAN	CD9	228	Homo sapiens	1:Experimental evidence at protein level	CD9 antigen	1	0.999	4	61	61	61	3	6	6	4	10	8	2	4	5	4	3	6	3	6	6	4	10	8	2	4	5	4	3	6	3	6	6	4	10	8	2	4	5	4	3	6
sp|P21953|ODBB_HUMAN	P21953	ODBB_HUMAN	BCKDHB	392	Homo sapiens	1:Experimental evidence at protein level	2-oxoisovalerate dehydrogenase subunit beta, mitochondrial	1	0.999	2	17	14	17	0	1	1	0	4	2	3	1	2	1	1	1	0	1	1	0	3	2	2	1	1	1	1	1	0	1	1	0	4	2	3	1	2	1	1	1
sp|P21964-2|COMT_HUMAN	P21964-2	COMT_HUMAN	COMT	221	Homo sapiens		Isoform Soluble of Catechol O-methyltransferase	1	0.999	12	431	0	431	34	36	48	43	51	39	30	27	32	32	28	31	0	0	0	0	0	0	0	0	0	0	0	0	34	36	48	43	51	39	30	27	32	32	28	31
sp|P21980|TGM2_HUMAN	P21980	TGM2_HUMAN	TGM2	687	Homo sapiens	1:Experimental evidence at protein level	Protein-glutamine gamma-glutamyltransferase 2	1	0.999	13	67	23	67	14	18	5	3	17	10	0	0	0	0	0	0	5	6	2	1	5	4	0	0	0	0	0	0	14	18	5	3	17	10	0	0	0	0	0	0
sp|P22033|MUTA_HUMAN	P22033	MUTA_HUMAN	MMUT	750	Homo sapiens	1:Experimental evidence at protein level	Methylmalonyl-CoA mutase, mitochondrial	1	0.999	2	18	18	18	2	3	2	2	2	3	0	0	1	2	0	1	2	3	2	2	2	3	0	0	1	2	0	1	2	3	2	2	2	3	0	0	1	2	0	1
sp|P22059|OSBP1_HUMAN	P22059	OSBP1_HUMAN	OSBP	807	Homo sapiens	1:Experimental evidence at protein level	Oxysterol-binding protein 1	1	0.999	14	95	95	95	7	9	10	13	8	5	6	11	7	8	5	6	7	9	10	13	8	5	6	11	7	8	5	6	7	9	10	13	8	5	6	11	7	8	5	6
sp|P22061-2|PIMT_HUMAN	P22061-2	PIMT_HUMAN	PCMT1	228	Homo sapiens		Isoform 2 of Protein-L-isoaspartate(D-aspartate) O-methyltransferase	1	0.999	7	126	0	126	10	12	7	12	13	8	10	7	13	10	10	14	0	0	0	0	0	0	0	0	0	0	0	0	10	12	7	12	13	8	10	7	13	10	10	14
sp|P22087|FBRL_HUMAN	P22087	FBRL_HUMAN	FBL	321	Homo sapiens	1:Experimental evidence at protein level	rRNA 2'-O-methyltransferase fibrillarin	1	0.999	7	140	140	140	13	15	6	8	10	13	8	11	13	12	15	16	13	15	6	8	10	13	8	11	13	12	15	16	13	15	6	8	10	13	8	11	13	12	15	16
sp|P22102|PUR2_HUMAN	P22102	PUR2_HUMAN	GART	1010	Homo sapiens	1:Experimental evidence at protein level	Trifunctional purine biosynthetic protein adenosine-3	1	0.999	21	283	106	283	21	19	10	10	43	19	21	28	26	31	27	28	6	7	6	3	18	7	9	10	8	13	10	9	21	19	10	10	43	19	21	28	26	31	27	28
sp|P22234|PUR6_HUMAN	P22234	PUR6_HUMAN	PAICS	425	Homo sapiens	1:Experimental evidence at protein level	Bifunctional phosphoribosylaminoimidazole carboxylase/phosphoribosylaminoimidazole succinocarboxamide synthetase	1	0.999	10	176	14	176	13	15	7	6	15	12	13	19	19	19	23	15	1	2	0	0	3	2	1	1	1	1	1	1	13	15	7	6	15	12	13	19	19	19	23	15
sp|P22307|SCP2_HUMAN	P22307	SCP2_HUMAN	SCP2	547	Homo sapiens	1:Experimental evidence at protein level	Sterol carrier protein 2	1	0.999	11	160	0	160	17	16	7	10	19	16	14	10	12	10	16	13	0	0	0	0	0	0	0	0	0	0	0	0	17	16	7	10	19	16	14	10	12	10	16	13
sp|P22309-2|UD11_HUMAN	P22309-2	UD11_HUMAN	UGT1A1	444	Homo sapiens		Isoform 2 of UDP-glucuronosyltransferase 1A1	1	0.999	4	14	0	14	1	3	4	2	1	3	0	0	0	0	0	0	0	0	0	0	0	0	0	0	0	0	0	0	1	3	4	2	1	3	0	0	0	0	0	0
sp|P22314-2|UBA1_HUMAN	P22314-2	UBA1_HUMAN	UBA1	1018	Homo sapiens		Isoform 2 of Ubiquitin-like modifier-activating enzyme 1	1	0.999	27	322	0	322	38	40	17	18	32	26	16	23	23	28	31	30	0	0	0	0	0	0	0	0	0	0	0	0	38	40	17	18	32	26	16	23	23	28	31	30
sp|P22392-2|NDKB_HUMAN	P22392-2	NDKB_HUMAN	NME2	267	Homo sapiens		Isoform 3 of Nucleoside diphosphate kinase B	1	0.999	14	573	0	573	42	38	28	45	47	38	81	60	45	47	57	45	0	0	0	0	0	0	0	0	0	0	0	0	42	38	28	45	47	38	81	60	45	47	57	45
sp|P22413|ENPP1_HUMAN	P22413	ENPP1_HUMAN	ENPP1	925	Homo sapiens	1:Experimental evidence at protein level	Ectonucleotide pyrophosphatase/phosphodiesterase family member 1	0.9469	0.999	1	6	6	6	0	0	2	1	1	1	0	1	0	0	0	0	0	0	2	1	1	1	0	1	0	0	0	0	0	0	2	1	1	1	0	1	0	0	0	0
sp|P22570-2|ADRO_HUMAN	P22570-2	ADRO_HUMAN	FDXR	497	Homo sapiens		Isoform Long of NADPH:adrenodoxin oxidoreductase, mitochondrial	1	0.999	7	114	0	114	10	7	8	6	13	10	10	9	13	11	8	9	0	0	0	0	0	0	0	0	0	0	0	0	10	7	8	6	13	10	10	9	13	11	8	9
sp|P22626-2|ROA2_HUMAN	P22626-2	ROA2_HUMAN	HNRNPA2B1	341	Homo sapiens		Isoform A2 of Heterogeneous nuclear ribonucleoproteins A2/B1	1	0.999	24	1274	0	1274	109	96	84	68	105	98	116	95	123	107	139	134	0	0	0	0	0	0	0	0	0	0	0	0	109	96	84	68	105	98	116	95	123	107	139	134
sp|P22692|IBP4_HUMAN	P22692	IBP4_HUMAN	IGFBP4	258	Homo sapiens	1:Experimental evidence at protein level	Insulin-like growth factor-binding protein 4	1	0.999	3	14	2	14	0	0	0	1	1	0	2	1	3	2	2	2	0	0	0	1	0	0	0	0	1	0	0	0	0	0	0	1	1	0	2	1	3	2	2	2
sp|P22695|QCR2_HUMAN	P22695	QCR2_HUMAN	UQCRC2	453	Homo sapiens	1:Experimental evidence at protein level	Cytochrome b-c1 complex subunit 2, mitochondrial	1	0.999	11	235	235	235	20	20	21	23	26	24	13	11	17	17	21	22	20	20	21	23	26	24	13	11	17	17	21	22	20	20	21	23	26	24	13	11	17	17	21	22
sp|P22830-2|HEMH_HUMAN	P22830-2	HEMH_HUMAN	FECH	429	Homo sapiens		Isoform 2 of Ferrochelatase, mitochondrial	1	0.999	4	42	0	42	3	4	5	6	4	4	2	3	3	1	2	5	0	0	0	0	0	0	0	0	0	0	0	0	3	4	5	6	4	4	2	3	3	1	2	5
sp|P23193-2|TCEA1_HUMAN	P23193-2	TCEA1_HUMAN	TCEA1	280	Homo sapiens		Isoform 2 of Transcription elongation factor A protein 1	1	0.999	6	67	0	67	8	7	1	1	7	4	2	8	5	7	8	9	0	0	0	0	0	0	0	0	0	0	0	0	8	7	1	1	7	4	2	8	5	7	8	9
sp|P23229-2|ITA6_HUMAN	P23229-2	ITA6_HUMAN	ITGA6	1073	Homo sapiens		Isoform Alpha-6X1A of Integrin alpha-6	1	0.999	17	257	0	257	16	20	15	13	16	15	23	25	30	26	30	28	0	0	0	0	0	0	0	0	0	0	0	0	16	20	15	13	16	15	23	25	30	26	30	28
sp|P23246|SFPQ_HUMAN	P23246	SFPQ_HUMAN	SFPQ	707	Homo sapiens	1:Experimental evidence at protein level	Splicing factor, proline- and glutamine-rich	1	0.999	20	388	25	388	29	37	23	32	26	25	29	28	39	35	43	42	3	3	1	0	3	2	3	1	2	2	3	2	29	37	23	32	26	25	29	28	39	35	43	42
sp|P23258|TBG1_HUMAN	P23258	TBG1_HUMAN	TUBG1	451	Homo sapiens	1:Experimental evidence at protein level	Tubulin gamma-1 chain	1	0.999	2	21	0	21	0	3	0	0	4	2	1	3	2	2	3	1	0	0	0	0	0	0	0	0	0	0	0	0	0	3	0	0	4	2	1	3	2	2	3	1
sp|P23284|PPIB_HUMAN	P23284	PPIB_HUMAN	PPIB	216	Homo sapiens	1:Experimental evidence at protein level	Peptidyl-prolyl cis-trans isomerase B	1	0.999	6	152	152	152	10	14	9	4	13	13	15	12	12	13	19	18	10	14	9	4	13	13	15	12	12	13	19	18	10	14	9	4	13	13	15	12	12	13	19	18
sp|P23368|MAOM_HUMAN	P23368	MAOM_HUMAN	ME2	584	Homo sapiens	1:Experimental evidence at protein level	NAD-dependent malic enzyme, mitochondrial	1	0.999	11	100	18	100	10	9	8	3	11	8	5	3	10	13	11	9	2	2	1	1	2	1	1	1	2	1	2	2	10	9	8	3	11	8	5	3	10	13	11	9
sp|P23381|SYWC_HUMAN	P23381	SYWC_HUMAN	WARS1	471	Homo sapiens	1:Experimental evidence at protein level	Tryptophan--tRNA ligase, cytoplasmic	1	0.999	13	103	14	103	9	11	4	5	14	10	8	7	11	8	10	6	1	1	1	3	1	1	1	1	1	1	1	1	9	11	4	5	14	10	8	7	11	8	10	6
sp|P23396|RS3_HUMAN	P23396	RS3_HUMAN	RPS3	243	Homo sapiens	1:Experimental evidence at protein level	40S ribosomal protein S3	1	0.999	6	52	5	52	8	8	1	0	6	7	2	3	2	3	5	7	1	2	0	0	0	0	0	0	0	0	0	2	8	8	1	0	6	7	2	3	2	3	5	7
sp|P23434|GCSH_HUMAN	P23434	GCSH_HUMAN	GCSH	173	Homo sapiens	1:Experimental evidence at protein level	Glycine cleavage system H protein, mitochondrial	0.9469	0.999	1	19	19	19	2	4	0	0	2	0	0	0	3	0	4	4	2	4	0	0	2	0	0	0	3	0	4	4	2	4	0	0	2	0	0	0	3	0	4	4
sp|P23526|SAHH_HUMAN	P23526	SAHH_HUMAN	AHCY	432	Homo sapiens	1:Experimental evidence at protein level	Adenosylhomocysteinase	1	0.999	12	392	12	392	33	35	35	27	41	31	38	24	30	28	36	34	4	2	1	0	3	0	0	0	0	0	0	2	33	35	35	27	41	31	38	24	30	28	36	34
sp|P23528|COF1_HUMAN	P23528	COF1_HUMAN	CFL1	166	Homo sapiens	1:Experimental evidence at protein level	Cofilin-1	1	0.999	13	2461	2284	2461	250	220	221	177	270	247	169	181	168	184	183	191	233	201	194	168	255	229	148	166	161	174	175	180	250	220	221	177	270	247	169	181	168	184	183	191
sp|P23588-2|IF4B_HUMAN	P23588-2	IF4B_HUMAN	EIF4B	572	Homo sapiens		Isoform 2 of Eukaryotic translation initiation factor 4B	1	0.999	20	303	0	303	20	23	27	21	24	24	25	28	26	29	26	30	0	0	0	0	0	0	0	0	0	0	0	0	20	23	27	21	24	24	25	28	26	29	26	30
sp|P23743|DGKA_HUMAN	P23743	DGKA_HUMAN	DGKA	735	Homo sapiens	1:Experimental evidence at protein level	Diacylglycerol kinase alpha	1	0.999	11	58	42	58	10	10	3	3	13	6	1	1	3	1	4	3	7	7	1	0	10	5	1	1	3	1	3	3	10	10	3	3	13	6	1	1	3	1	4	3
sp|P23786|CPT2_HUMAN	P23786	CPT2_HUMAN	CPT2	658	Homo sapiens	1:Experimental evidence at protein level	Carnitine O-palmitoyltransferase 2, mitochondrial	1	0.999	10	129	129	129	16	16	8	9	14	14	6	8	12	9	9	8	16	16	8	9	14	14	6	8	12	9	9	8	16	16	8	9	14	14	6	8	12	9	9	8
sp|P23919-2|KTHY_HUMAN	P23919-2	KTHY_HUMAN	DTYMK	188	Homo sapiens		Isoform 2 of Thymidylate kinase	1	0.999	7	70	0	70	4	4	6	4	5	3	4	6	6	8	10	10	0	0	0	0	0	0	0	0	0	0	0	0	4	4	6	4	5	3	4	6	6	8	10	10
sp|P24043|LAMA2_HUMAN	P24043	LAMA2_HUMAN	LAMA2	3122	Homo sapiens	1:Experimental evidence at protein level	Laminin subunit alpha-2	1	0.999	5	24	24	72	1	2	1	0	2	3	2	4	3	1	2	3	1	2	1	0	2	3	2	4	3	1	2	3	6	6	13	4	7	7	3	7	5	4	5	5
sp|P24390-2|ERD21_HUMAN	P24390-2	ERD21_HUMAN	KDELR1	150	Homo sapiens		Isoform 2 of ER lumen protein-retaining receptor 1	0.9962	0.999	2	17	0	30	0	2	1	5	2	2	0	2	0	1	1	1	0	0	0	0	0	0	0	0	0	0	0	0	4	4	1	5	3	4	0	3	1	2	2	1
sp|P24534|EF1B_HUMAN	P24534	EF1B_HUMAN	EEF1B2	225	Homo sapiens	1:Experimental evidence at protein level	Elongation factor 1-beta	1	0.999	6	109	81	109	7	9	6	5	8	6	19	7	12	10	10	10	6	7	4	4	8	3	14	5	8	8	8	6	7	9	6	5	8	6	19	7	12	10	10	10
sp|P24539|AT5F1_HUMAN	P24539	AT5F1_HUMAN	ATP5PB	256	Homo sapiens	1:Experimental evidence at protein level	ATP synthase F(0) complex subunit B1, mitochondrial	1	0.999	10	95	95	95	6	7	10	8	14	8	5	6	9	7	7	8	6	7	10	8	14	8	5	6	9	7	7	8	6	7	10	8	14	8	5	6	9	7	7	8
sp|P24557-2|THAS_HUMAN	P24557-2	THAS_HUMAN	TBXAS1	466	Homo sapiens		Isoform 2 of Thromboxane-A synthase	1	0.999	3	10	0	10	0	0	1	0	2	0	1	1	0	3	1	1	0	0	0	0	0	0	0	0	0	0	0	0	0	0	1	0	2	0	1	1	0	3	1	1
sp|P24666|PPAC_HUMAN	P24666	PPAC_HUMAN	ACP1	158	Homo sapiens	1:Experimental evidence at protein level	Low molecular weight phosphotyrosine protein phosphatase	1	0.999	3	13	0	13	1	3	0	0	2	0	0	1	1	1	2	2	0	0	0	0	0	0	0	0	0	0	0	0	1	3	0	0	2	0	0	1	1	1	2	2
sp|P24752|THIL_HUMAN	P24752	THIL_HUMAN	ACAT1	427	Homo sapiens	1:Experimental evidence at protein level	Acetyl-CoA acetyltransferase, mitochondrial	1	0.999	9	137	128	137	15	10	4	9	13	11	10	7	10	16	17	15	13	8	4	9	12	10	10	7	9	16	16	14	15	10	4	9	13	11	10	7	10	16	17	15
sp|P24928|RPB1_HUMAN	P24928	RPB1_HUMAN	POLR2A	1970	Homo sapiens	1:Experimental evidence at protein level	DNA-directed RNA polymerase II subunit RPB1	1	0.9984	7	15	12	15	1	0	2	3	0	1	1	1	1	3	0	2	0	0	2	3	0	1	1	0	1	3	0	1	1	0	2	3	0	1	1	1	1	3	0	2
sp|P25098|ARBK1_HUMAN	P25098	ARBK1_HUMAN	GRK2	689	Homo sapiens	1:Experimental evidence at protein level	Beta-adrenergic receptor kinase 1	1	0.999	4	13	10	13	0	1	3	3	2	3	0	0	0	0	1	0	0	1	2	3	2	2	0	0	0	0	0	0	0	1	3	3	2	3	0	0	0	0	1	0
sp|P25205-2|MCM3_HUMAN	P25205-2	MCM3_HUMAN	MCM3	853	Homo sapiens		Isoform 2 of DNA replication licensing factor MCM3	1	0.999	14	68	0	68	0	1	0	0	1	0	9	11	12	9	12	13	0	0	0	0	0	0	0	0	0	0	0	0	0	1	0	0	1	0	9	11	12	9	12	13
sp|P25311|ZA2G_HUMAN	P25311	ZA2G_HUMAN	AZGP1	298	Homo sapiens	1:Experimental evidence at protein level	Zinc-alpha-2-glycoprotein	1	0.999	6	75	75	75	6	13	2	4	11	9	3	4	5	7	5	6	6	13	2	4	11	9	3	4	5	7	5	6	6	13	2	4	11	9	3	4	5	7	5	6
sp|P25325-2|THTM_HUMAN	P25325-2	THTM_HUMAN	MPST	317	Homo sapiens		Isoform 2 of 3-mercaptopyruvate sulfurtransferase	1	0.999	9	164	0	164	13	16	10	13	21	19	10	11	14	14	13	10	0	0	0	0	0	0	0	0	0	0	0	0	13	16	10	13	21	19	10	11	14	14	13	10
sp|P25391|LAMA1_HUMAN	P25391	LAMA1_HUMAN	LAMA1	3075	Homo sapiens	1:Experimental evidence at protein level	Laminin subunit alpha-1	1	0.999	28	957	909	957	79	86	62	46	93	75	106	93	83	92	74	68	74	82	50	42	88	71	105	90	81	89	71	66	79	86	62	46	93	75	106	93	83	92	74	68
sp|P25398|RS12_HUMAN	P25398	RS12_HUMAN	RPS12	132	Homo sapiens	1:Experimental evidence at protein level	40S ribosomal protein S12	1	0.999	5	151	151	151	8	6	22	19	9	9	13	17	9	9	16	14	8	6	22	19	9	9	13	17	9	9	16	14	8	6	22	19	9	9	13	17	9	9	16	14
sp|P25440-2|BRD2_HUMAN	P25440-2	BRD2_HUMAN	BRD2	836	Homo sapiens		Isoform 2 of Bromodomain-containing protein 2	1	0.999	1	12	0	12	1	0	1	1	0	0	1	1	2	2	2	1	0	0	0	0	0	0	0	0	0	0	0	0	1	0	1	1	0	0	1	1	2	2	2	1
sp|P25445-6|TNR6_HUMAN	P25445-6	TNR6_HUMAN	FAS	314	Homo sapiens		Isoform 6 of Tumor necrosis factor receptor superfamily member 6	1	0.999	2	38	0	38	2	4	1	1	1	5	2	3	5	4	7	3	0	0	0	0	0	0	0	0	0	0	0	0	2	4	1	1	1	5	2	3	5	4	7	3
sp|P25490|TYY1_HUMAN	P25490	TYY1_HUMAN	YY1	414	Homo sapiens	1:Experimental evidence at protein level	Transcriptional repressor protein YY1	1	0.999	4	69	44	69	4	5	2	3	3	1	6	6	8	10	11	10	3	4	0	1	1	0	3	5	5	7	8	7	4	5	2	3	3	1	6	6	8	10	11	10
sp|P25685|DNJB1_HUMAN	P25685	DNJB1_HUMAN	DNAJB1	340	Homo sapiens	1:Experimental evidence at protein level	DnaJ homolog subfamily B member 1	1	0.999	10	74	41	74	4	9	6	7	9	6	7	2	5	5	8	6	3	4	2	4	5	5	3	2	2	4	3	4	4	9	6	7	9	6	7	2	5	5	8	6
sp|P25686-2|DNJB2_HUMAN	P25686-2	DNJB2_HUMAN	DNAJB2	277	Homo sapiens		Isoform 2 of DnaJ homolog subfamily B member 2	1	0.9983	3	3	0	3	0	1	0	1	1	0	0	0	0	0	0	0	0	0	0	0	0	0	0	0	0	0	0	0	0	1	0	1	1	0	0	0	0	0	0	0
sp|P25705|ATPA_HUMAN	P25705	ATPA_HUMAN	ATP5F1A	553	Homo sapiens	1:Experimental evidence at protein level	ATP synthase subunit alpha, mitochondrial	1	0.999	19	440	0	440	42	47	46	40	49	46	20	23	29	27	41	30	0	0	0	0	0	0	0	0	0	0	0	0	42	47	46	40	49	46	20	23	29	27	41	30
sp|P25786-2|PSA1_HUMAN	P25786-2	PSA1_HUMAN	PSMA1	269	Homo sapiens		Isoform Long of Proteasome subunit alpha type-1	1	0.999	8	129	0	129	14	12	10	7	14	8	10	9	8	13	15	9	0	0	0	0	0	0	0	0	0	0	0	0	14	12	10	7	14	8	10	9	8	13	15	9
sp|P25787|PSA2_HUMAN	P25787	PSA2_HUMAN	PSMA2	234	Homo sapiens	1:Experimental evidence at protein level	Proteasome subunit alpha type-2	1	0.999	5	119	119	119	8	6	21	13	11	8	7	10	8	9	8	10	8	6	21	13	11	8	7	10	8	9	8	10	8	6	21	13	11	8	7	10	8	9	8	10
sp|P25788-2|PSA3_HUMAN	P25788-2	PSA3_HUMAN	PSMA3	248	Homo sapiens		Isoform 2 of Proteasome subunit alpha type-3	1	0.999	7	80	0	80	8	9	6	5	7	6	7	5	9	6	6	6	0	0	0	0	0	0	0	0	0	0	0	0	8	9	6	5	7	6	7	5	9	6	6	6
sp|P25789|PSA4_HUMAN	P25789	PSA4_HUMAN	PSMA4	261	Homo sapiens	1:Experimental evidence at protein level	Proteasome subunit alpha type-4	1	0.999	5	121	41	121	8	11	0	6	14	18	12	10	8	12	13	9	4	2	0	0	6	8	4	0	3	5	5	4	8	11	0	6	14	18	12	10	8	12	13	9
sp|P25815|S100P_HUMAN	P25815	S100P_HUMAN	S100P	95	Homo sapiens	1:Experimental evidence at protein level	Protein S100-P	1	0.999	7	201	201	201	28	23	55	21	27	16	3	1	6	9	5	7	28	23	55	21	27	16	3	1	6	9	5	7	28	23	55	21	27	16	3	1	6	9	5	7
sp|P25963|IKBA_HUMAN	P25963	IKBA_HUMAN	NFKBIA	317	Homo sapiens	1:Experimental evidence at protein level	NF-kappa-B inhibitor alpha	0.937	0.9988	1	5	5	5	0	0	1	1	0	0	1	1	1	0	0	0	0	0	1	1	0	0	1	1	1	0	0	0	0	0	1	1	0	0	1	1	1	0	0	0
sp|P26006-1|ITA3_HUMAN	P26006-1	ITA3_HUMAN	ITGA3	1066	Homo sapiens		Isoform 2 of Integrin alpha-3	1	0.999	5	25	0	25	3	3	6	4	2	0	0	0	1	0	2	4	0	0	0	0	0	0	0	0	0	0	0	0	3	3	6	4	2	0	0	0	1	0	2	4
sp|P26045-2|PTN3_HUMAN	P26045-2	PTN3_HUMAN	PTPN3	782	Homo sapiens		Isoform 2 of Tyrosine-protein phosphatase non-receptor type 3	0.9456	0.999	1	2	0	2	0	0	0	1	0	0	0	1	0	0	0	0	0	0	0	0	0	0	0	0	0	0	0	0	0	0	0	1	0	0	0	1	0	0	0	0
sp|P26196|DDX6_HUMAN	P26196	DDX6_HUMAN	DDX6	483	Homo sapiens	1:Experimental evidence at protein level	Probable ATP-dependent RNA helicase DDX6	1	0.999	7	73	73	73	4	5	6	5	6	6	5	6	6	8	10	6	4	5	6	5	6	6	5	6	6	8	10	6	4	5	6	5	6	6	5	6	6	8	10	6
sp|P26232-5|CTNA2_HUMAN	P26232-5	CTNA2_HUMAN	CTNNA2	939	Homo sapiens		Isoform 5 of Catenin alpha-2	1	0.999	8	27	1	79	2	3	1	0	3	0	4	1	4	2	3	4	0	0	0	0	0	0	0	0	0	0	1	0	8	8	3	2	7	4	9	5	8	6	10	9
sp|P26368-2|U2AF2_HUMAN	P26368-2	U2AF2_HUMAN	U2AF2	471	Homo sapiens		Isoform 2 of Splicing factor U2AF 65 kDa subunit	1	0.999	6	50	0	50	7	8	1	2	4	1	4	3	3	4	7	6	0	0	0	0	0	0	0	0	0	0	0	0	7	8	1	2	4	1	4	3	3	4	7	6
sp|P26373-2|RL13_HUMAN	P26373-2	RL13_HUMAN	RPL13	164	Homo sapiens		Isoform 2 of 60S ribosomal protein L13	1	0.999	5	35	0	35	2	3	4	4	2	4	2	2	3	2	2	5	0	0	0	0	0	0	0	0	0	0	0	0	2	3	4	4	2	4	2	2	3	2	2	5
sp|P26440|IVD_HUMAN	P26440	IVD_HUMAN	IVD	426	Homo sapiens	1:Experimental evidence at protein level	Isovaleryl-CoA dehydrogenase, mitochondrial	1	0.999	6	29	5	29	2	1	3	13	3	3	1	0	0	0	1	2	1	1	1	0	1	1	0	0	0	0	0	0	2	1	3	13	3	3	1	0	0	0	1	2
sp|P26572|MGAT1_HUMAN	P26572	MGAT1_HUMAN	MGAT1	445	Homo sapiens	1:Experimental evidence at protein level	Alpha-1,3-mannosyl-glycoprotein 2-beta-N-acetylglucosaminyltransferase	0.998	0.999	1	3	3	3	0	0	1	1	1	0	0	0	0	0	0	0	0	0	1	1	1	0	0	0	0	0	0	0	0	0	1	1	1	0	0	0	0	0	0	0
sp|P26583|HMGB2_HUMAN	P26583	HMGB2_HUMAN	HMGB2	209	Homo sapiens	1:Experimental evidence at protein level	High mobility group protein B2	1	0.999	16	269	267	273	14	14	15	26	25	15	23	24	30	23	32	28	14	14	15	26	25	15	22	24	29	23	32	28	14	14	15	26	25	15	23	24	31	23	34	29
sp|P26599-1|PTBP1_HUMAN	P26599-1	PTBP1_HUMAN	PTBP1	531	Homo sapiens		Isoform 2 of Polypyrimidine tract-binding protein 1	1	0.999	15	374	0	374	35	25	11	8	47	40	24	30	42	37	41	34	0	0	0	0	0	0	0	0	0	0	0	0	35	25	11	8	47	40	24	30	42	37	41	34
sp|P26639|SYTC_HUMAN	P26639	SYTC_HUMAN	TARS1	723	Homo sapiens	1:Experimental evidence at protein level	Threonine--tRNA ligase 1, cytoplasmic	1	0.999	17	232	12	232	27	30	13	10	29	27	12	10	19	17	19	19	3	2	0	0	0	1	0	0	1	0	1	4	27	30	13	10	29	27	12	10	19	17	19	19
sp|P26640|SYVC_HUMAN	P26640	SYVC_HUMAN	VARS1	1264	Homo sapiens	1:Experimental evidence at protein level	Valine--tRNA ligase	1	0.999	13	133	100	133	10	12	4	5	12	11	8	10	16	14	16	15	7	7	3	4	9	9	6	8	13	11	12	11	10	12	4	5	12	11	8	10	16	14	16	15
sp|P26641-2|EF1G_HUMAN	P26641-2	EF1G_HUMAN	EEF1G	487	Homo sapiens		Isoform 2 of Elongation factor 1-gamma	1	0.999	14	333	0	333	24	30	15	12	22	26	32	28	38	36	39	31	0	0	0	0	0	0	0	0	0	0	0	0	24	30	15	12	22	26	32	28	38	36	39	31
sp|P26885|FKBP2_HUMAN	P26885	FKBP2_HUMAN	FKBP2	142	Homo sapiens	1:Experimental evidence at protein level	Peptidyl-prolyl cis-trans isomerase FKBP2	1	0.999	2	28	28	28	1	1	3	2	1	3	0	3	4	4	3	3	1	1	3	2	1	3	0	3	4	4	3	3	1	1	3	2	1	3	0	3	4	4	3	3
sp|P27144|KAD4_HUMAN	P27144	KAD4_HUMAN	AK4	223	Homo sapiens	1:Experimental evidence at protein level	Adenylate kinase 4, mitochondrial	1	0.999	3	36	36	36	3	3	3	2	4	3	2	4	2	3	3	4	3	3	3	2	4	3	2	4	2	3	3	4	3	3	3	2	4	3	2	4	2	3	3	4
sp|P27216-2|ANX13_HUMAN	P27216-2	ANX13_HUMAN	ANXA13	357	Homo sapiens		Isoform B of Annexin A13	1	0.999	6	53	5	53	5	6	8	4	3	9	1	2	3	2	3	7	2	0	2	0	0	1	0	0	0	0	0	0	5	6	8	4	3	9	1	2	3	2	3	7
sp|P27338|AOFB_HUMAN	P27338	AOFB_HUMAN	MAOB	520	Homo sapiens	1:Experimental evidence at protein level	Amine oxidase [flavin-containing] B	0.9999	0.999	4	19	8	20	4	3	3	2	4	3	0	0	0	0	0	0	1	1	1	1	2	2	0	0	0	0	0	0	4	3	3	2	5	3	0	0	0	0	0	0
sp|P27348|1433T_HUMAN	P27348	1433T_HUMAN	YWHAQ	245	Homo sapiens	1:Experimental evidence at protein level	14-3-3 protein theta	1	0.999	14	218	218	634	18	20	3	5	27	16	25	15	20	20	26	23	18	20	3	5	27	16	25	15	20	20	26	23	59	66	22	17	72	51	59	37	66	47	84	54
sp|P27361-2|MK03_HUMAN	P27361-2	MK03_HUMAN	MAPK3	335	Homo sapiens		Isoform 2 of Mitogen-activated protein kinase 3	1	0.999	9	132	0	132	10	15	7	7	12	13	10	9	10	10	16	13	0	0	0	0	0	0	0	0	0	0	0	0	10	15	7	7	12	13	10	9	10	10	16	13
sp|P27448-2|MARK3_HUMAN	P27448-2	MARK3_HUMAN	MARK3	752	Homo sapiens		Isoform 2 of MAP/microtubule affinity-regulating kinase 3	1	0.999	2	3	0	3	1	0	1	0	0	0	0	0	0	0	1	0	0	0	0	0	0	0	0	0	0	0	0	0	1	0	1	0	0	0	0	0	0	0	1	0
sp|P27487|DPP4_HUMAN	P27487	DPP4_HUMAN	DPP4	766	Homo sapiens	1:Experimental evidence at protein level	Dipeptidyl peptidase 4	1	0.999	5	26	26	26	1	3	5	3	5	2	0	0	3	1	0	3	1	3	5	3	5	2	0	0	3	1	0	3	1	3	5	3	5	2	0	0	3	1	0	3
sp|P27635|RL10_HUMAN	P27635	RL10_HUMAN	RPL10	214	Homo sapiens	1:Experimental evidence at protein level	60S ribosomal protein L10	1	0.999	4	47	36	47	3	2	5	5	3	5	4	4	5	4	4	3	3	2	3	3	3	3	3	3	4	3	4	2	3	2	5	5	3	5	4	4	5	4	4	3
sp|P27694|RFA1_HUMAN	P27694	RFA1_HUMAN	RPA1	616	Homo sapiens	1:Experimental evidence at protein level	Replication protein A 70 kDa DNA-binding subunit	1	0.999	10	65	65	65	3	5	5	3	2	6	3	9	9	7	5	8	3	5	5	3	2	6	3	9	9	7	5	8	3	5	5	3	2	6	3	9	9	7	5	8
sp|P27695|APEX1_HUMAN	P27695	APEX1_HUMAN	APEX1	318	Homo sapiens	1:Experimental evidence at protein level	DNA-(apurinic or apyrimidinic site) endonuclease	1	0.999	11	148	148	148	9	11	15	14	14	15	11	13	10	11	13	12	9	11	15	14	14	15	11	13	10	11	13	12	9	11	15	14	14	15	11	13	10	11	13	12
sp|P27701-2|CD82_HUMAN	P27701-2	CD82_HUMAN	CD82	242	Homo sapiens		Isoform 2 of CD82 antigen	1	0.9984	2	4	0	4	1	0	1	2	0	0	0	0	0	0	0	0	0	0	0	0	0	0	0	0	0	0	0	0	1	0	1	2	0	0	0	0	0	0	0	0
sp|P27707|DCK_HUMAN	P27707	DCK_HUMAN	DCK	260	Homo sapiens	1:Experimental evidence at protein level	Deoxycytidine kinase	0.9967	0.9983	1	1	1	1	0	0	0	0	0	0	0	0	0	1	0	0	0	0	0	0	0	0	0	0	0	1	0	0	0	0	0	0	0	0	0	0	0	1	0	0
sp|P27708|PYR1_HUMAN	P27708	PYR1_HUMAN	CAD	2225	Homo sapiens	1:Experimental evidence at protein level	CAD protein	1	0.999	21	199	199	199	12	11	8	11	12	11	15	20	27	29	20	23	12	11	8	11	12	11	15	20	27	29	20	23	12	11	8	11	12	11	15	20	27	29	20	23
sp|P27797|CALR_HUMAN	P27797	CALR_HUMAN	CALR	417	Homo sapiens	1:Experimental evidence at protein level	Calreticulin	1	0.999	21	901	901	901	67	81	72	59	84	79	63	77	88	71	80	80	67	81	72	59	84	79	63	77	88	71	80	80	67	81	72	59	84	79	63	77	88	71	80	80
sp|P27816-6|MAP4_HUMAN	P27816-6	MAP4_HUMAN	MAP4	1135	Homo sapiens		Isoform 6 of Microtubule-associated protein 4	1	0.999	14	124	0	124	13	10	9	6	11	9	8	19	10	9	11	9	0	0	0	0	0	0	0	0	0	0	0	0	13	10	9	6	11	9	8	19	10	9	11	9
sp|P27824-2|CALX_HUMAN	P27824-2	CALX_HUMAN	CANX	627	Homo sapiens		Isoform 2 of Calnexin	1	0.999	21	389	0	389	26	28	35	30	34	27	34	29	32	38	39	37	0	0	0	0	0	0	0	0	0	0	0	0	26	28	35	30	34	27	34	29	32	38	39	37
sp|P27986-4|P85A_HUMAN	P27986-4	P85A_HUMAN	PIK3R1	732	Homo sapiens		Isoform 4 of Phosphatidylinositol 3-kinase regulatory subunit alpha	1	0.9989	3	4	0	4	0	1	2	0	1	0	0	0	0	0	0	0	0	0	0	0	0	0	0	0	0	0	0	0	0	1	2	0	1	0	0	0	0	0	0	0
sp|P28062-2|PSB8_HUMAN	P28062-2	PSB8_HUMAN	PSMB8	272	Homo sapiens		Isoform 2 of Proteasome subunit beta type-8	1	0.999	5	81	0	81	4	6	6	8	7	8	6	6	9	8	6	7	0	0	0	0	0	0	0	0	0	0	0	0	4	6	6	8	7	8	6	6	9	8	6	7
sp|P28065-2|PSB9_HUMAN	P28065-2	PSB9_HUMAN	PSMB9	209	Homo sapiens		Isoform LMP2.S of Proteasome subunit beta type-9	0.9469	0.999	1	19	0	19	2	1	3	2	1	1	1	2	1	2	1	2	0	0	0	0	0	0	0	0	0	0	0	0	2	1	3	2	1	1	1	2	1	2	1	2
sp|P28066|PSA5_HUMAN	P28066	PSA5_HUMAN	PSMA5	241	Homo sapiens	1:Experimental evidence at protein level	Proteasome subunit alpha type-5	1	0.999	5	122	3	122	7	11	7	19	10	9	12	7	11	9	11	9	1	1	0	0	0	0	0	0	0	0	1	0	7	11	7	19	10	9	12	7	11	9	11	9
sp|P28070|PSB4_HUMAN	P28070	PSB4_HUMAN	PSMB4	264	Homo sapiens	1:Experimental evidence at protein level	Proteasome subunit beta type-4	1	0.999	3	15	15	15	3	3	0	0	1	1	1	0	2	0	1	3	3	3	0	0	1	1	1	0	2	0	1	3	3	3	0	0	1	1	1	0	2	0	1	3
sp|P28072|PSB6_HUMAN	P28072	PSB6_HUMAN	PSMB6	239	Homo sapiens	1:Experimental evidence at protein level	Proteasome subunit beta type-6	0.9469	0.999	1	6	6	6	1	0	0	0	3	2	0	0	0	0	0	0	1	0	0	0	3	2	0	0	0	0	0	0	1	0	0	0	3	2	0	0	0	0	0	0
sp|P28074|PSB5_HUMAN	P28074	PSB5_HUMAN	PSMB5	263	Homo sapiens	1:Experimental evidence at protein level	Proteasome subunit beta type-5	1	0.999	4	40	0	40	4	3	2	2	4	6	3	2	3	3	6	2	0	0	0	0	0	0	0	0	0	0	0	0	4	3	2	2	4	6	3	2	3	3	6	2
sp|P28288|ABCD3_HUMAN	P28288	ABCD3_HUMAN	ABCD3	659	Homo sapiens	1:Experimental evidence at protein level	ATP-binding cassette sub-family D member 3	1	0.999	12	120	32	120	9	16	14	13	16	14	6	4	6	7	8	7	2	5	5	6	2	2	3	1	1	2	2	1	9	16	14	13	16	14	6	4	6	7	8	7
sp|P28290-2|ITPI2_HUMAN	P28290-2	ITPI2_HUMAN	ITPRID2	1106	Homo sapiens		Isoform 2 of Protein ITPRID2	1	0.999	8	33	0	33	1	2	2	5	5	5	1	1	3	3	2	3	0	0	0	0	0	0	0	0	0	0	0	0	1	2	2	5	5	5	1	1	3	3	2	3
sp|P28331-2|NDUS1_HUMAN	P28331-2	NDUS1_HUMAN	NDUFS1	741	Homo sapiens		Isoform 2 of NADH-ubiquinone oxidoreductase 75 kDa subunit, mitochondrial	1	0.999	9	84	0	84	14	13	3	2	10	10	3	5	4	3	10	7	0	0	0	0	0	0	0	0	0	0	0	0	14	13	3	2	10	10	3	5	4	3	10	7
sp|P28332-2|ADH6_HUMAN	P28332-2	ADH6_HUMAN	ADH6	375	Homo sapiens		Isoform 2 of Alcohol dehydrogenase 6	0.9999	0.999	2	4	0	4	1	0	2	1	0	0	0	0	0	0	0	0	0	0	0	0	0	0	0	0	0	0	0	0	1	0	2	1	0	0	0	0	0	0	0	0
sp|P28347-2|TEAD1_HUMAN	P28347-2	TEAD1_HUMAN	TEAD1	357	Homo sapiens		Isoform 2 of Transcriptional enhancer factor TEF-1	0.9469	0.999	1	5	0	5	0	0	0	0	0	0	0	0	1	2	1	1	0	0	0	0	0	0	0	0	0	0	0	0	0	0	0	0	0	0	0	0	1	2	1	1
sp|P28482-2|MK01_HUMAN	P28482-2	MK01_HUMAN	MAPK1	316	Homo sapiens		Isoform 2 of Mitogen-activated protein kinase 1	1	0.999	7	7	0	71	0	0	2	1	2	1	0	0	1	0	0	0	0	0	0	0	0	0	0	0	0	0	0	0	5	8	5	3	5	9	6	5	7	5	7	6
sp|P28799-2|GRN_HUMAN	P28799-2	GRN_HUMAN	GRN	438	Homo sapiens		Isoform 2 of Progranulin	0.9469	0.999	1	14	0	14	1	1	1	2	2	1	0	2	1	1	1	1	0	0	0	0	0	0	0	0	0	0	0	0	1	1	1	2	2	1	0	2	1	1	1	1
sp|P28827-2|PTPRM_HUMAN	P28827-2	PTPRM_HUMAN	PTPRM	1465	Homo sapiens		Isoform 2 of Receptor-type tyrosine-protein phosphatase mu	0.9997	0.9909	2	2	0	2	0	0	0	0	0	0	1	0	0	1	0	0	0	0	0	0	0	0	0	0	0	0	0	0	0	0	0	0	0	0	1	0	0	1	0	0
sp|P28838-2|AMPL_HUMAN	P28838-2	AMPL_HUMAN	LAP3	488	Homo sapiens		Isoform 2 of Cytosol aminopeptidase	1	0.999	14	72	0	72	6	9	3	4	13	8	6	5	3	7	5	3	0	0	0	0	0	0	0	0	0	0	0	0	6	9	3	4	13	8	6	5	3	7	5	3
sp|P29083|T2EA_HUMAN	P29083	T2EA_HUMAN	GTF2E1	439	Homo sapiens	1:Experimental evidence at protein level	General transcription factor IIE subunit 1	1	0.999	1	6	6	6	0	0	2	4	0	0	0	0	0	0	0	0	0	0	2	4	0	0	0	0	0	0	0	0	0	0	2	4	0	0	0	0	0	0	0	0
sp|P29144|TPP2_HUMAN	P29144	TPP2_HUMAN	TPP2	1249	Homo sapiens	1:Experimental evidence at protein level	Tripeptidyl-peptidase 2	1	0.999	14	108	108	108	16	8	2	5	9	11	4	6	11	11	11	14	16	8	2	5	9	11	4	6	11	11	11	14	16	8	2	5	9	11	4	6	11	11	11	14
sp|P29218-2|IMPA1_HUMAN	P29218-2	IMPA1_HUMAN	IMPA1	198	Homo sapiens		Isoform 2 of Inositol monophosphatase 1	1	0.999	4	16	0	16	2	2	1	0	6	2	0	0	1	0	1	1	0	0	0	0	0	0	0	0	0	0	0	0	2	2	1	0	6	2	0	0	1	0	1	1
sp|P29317|EPHA2_HUMAN	P29317	EPHA2_HUMAN	EPHA2	976	Homo sapiens	1:Experimental evidence at protein level	Ephrin type-A receptor 2	1	0.999	5	43	41	43	4	3	3	4	6	3	1	4	3	5	4	3	4	3	2	3	6	3	1	4	3	5	4	3	4	3	3	4	6	3	1	4	3	5	4	3
sp|P29323|EPHB2_HUMAN	P29323	EPHB2_HUMAN	EPHB2	1055	Homo sapiens	1:Experimental evidence at protein level	Ephrin type-B receptor 2	0.9998	0.9984	2	5	1	5	0	0	2	3	0	0	0	0	0	0	0	0	0	0	0	1	0	0	0	0	0	0	0	0	0	0	2	3	0	0	0	0	0	0	0	0
sp|P29350-2|PTN6_HUMAN	P29350-2	PTN6_HUMAN	PTPN6	556	Homo sapiens		Isoform 3 of Tyrosine-protein phosphatase non-receptor type 6	1	0.999	4	11	0	11	0	0	4	4	1	0	1	0	0	0	1	0	0	0	0	0	0	0	0	0	0	0	0	0	0	0	4	4	1	0	1	0	0	0	1	0
sp|P29353-2|SHC1_HUMAN	P29353-2	SHC1_HUMAN	SHC1	473	Homo sapiens		Isoform p52Shc of SHC-transforming protein 1	0.9469	0.999	1	11	0	11	0	1	1	0	2	1	1	1	1	1	1	1	0	0	0	0	0	0	0	0	0	0	0	0	0	1	1	0	2	1	1	1	1	1	1	1
sp|P29372-2|3MG_HUMAN	P29372-2	3MG_HUMAN	MPG	293	Homo sapiens		Isoform 2 of DNA-3-methyladenine glycosylase	0.9469	0.999	1	5	0	5	0	0	0	0	1	0	0	2	0	1	1	0	0	0	0	0	0	0	0	0	0	0	0	0	0	0	0	0	1	0	0	2	0	1	1	0
sp|P29373|RABP2_HUMAN	P29373	RABP2_HUMAN	CRABP2	138	Homo sapiens	1:Experimental evidence at protein level	Cellular retinoic acid-binding protein 2	0.9469	0.999	1	18	18	18	0	0	0	0	0	0	4	3	2	3	2	4	0	0	0	0	0	0	4	3	2	3	2	4	0	0	0	0	0	0	4	3	2	3	2	4
sp|P29401-2|TKT_HUMAN	P29401-2	TKT_HUMAN	TKT	631	Homo sapiens		Isoform 2 of Transketolase	1	0.999	29	840	0	840	65	68	75	79	93	88	47	58	60	58	74	75	0	0	0	0	0	0	0	0	0	0	0	0	65	68	75	79	93	88	47	58	60	58	74	75
sp|P29558-2|RBMS1_HUMAN	P29558-2	RBMS1_HUMAN	RBMS1	403	Homo sapiens		Isoform 2 of RNA-binding motif, single-stranded-interacting protein 1	0.8632	0.9972	1	1	0	1	0	0	0	0	0	0	0	0	1	0	0	0	0	0	0	0	0	0	0	0	0	0	0	0	0	0	0	0	0	0	0	0	1	0	0	0
sp|P29590-11|PML_HUMAN	P29590-11	PML_HUMAN	PML	834	Homo sapiens		Isoform PML-11 of Protein PML	1	0.999	7	21	0	21	2	3	5	4	2	2	0	2	0	0	0	1	0	0	0	0	0	0	0	0	0	0	0	0	2	3	5	4	2	2	0	2	0	0	0	1
sp|P29597|TYK2_HUMAN	P29597	TYK2_HUMAN	TYK2	1187	Homo sapiens	1:Experimental evidence at protein level	Non-receptor tyrosine-protein kinase TYK2	0.9994	0.999	2	3	3	3	1	0	1	1	0	0	0	0	0	0	0	0	1	0	1	1	0	0	0	0	0	0	0	0	1	0	1	1	0	0	0	0	0	0	0	0
sp|P29692-3|EF1D_HUMAN	P29692-3	EF1D_HUMAN	EEF1D	257	Homo sapiens		Isoform 3 of Elongation factor 1-delta	1	0.999	11	29	29	125	4	4	2	2	2	2	2	1	1	3	3	3	4	4	2	2	2	2	2	1	1	3	3	3	11	10	10	7	7	11	12	9	10	9	12	17
sp|P29692|EF1D_HUMAN	P29692	EF1D_HUMAN	EEF1D	281	Homo sapiens	1:Experimental evidence at protein level	Elongation factor 1-delta	1	0.999	12	103	0	131	10	8	11	9	6	9	6	8	7	7	10	12	0	0	0	0	0	0	0	0	0	0	0	0	11	10	13	10	6	12	11	10	11	9	12	16
sp|P29966|MARCS_HUMAN	P29966	MARCS_HUMAN	MARCKS	332	Homo sapiens	1:Experimental evidence at protein level	Myristoylated alanine-rich C-kinase substrate	1	0.999	10	133	120	133	15	16	7	8	18	14	3	7	15	10	7	13	15	15	3	6	17	13	3	6	14	10	7	11	15	16	7	8	18	14	3	7	15	10	7	13
sp|P29992|GNA11_HUMAN	P29992	GNA11_HUMAN	GNA11	359	Homo sapiens	1:Experimental evidence at protein level	Guanine nucleotide-binding protein subunit alpha-11	1	0.999	3	45	26	45	6	2	4	3	5	6	1	2	5	4	4	3	4	1	3	2	3	3	0	1	2	3	3	1	6	2	4	3	5	6	1	2	5	4	4	3
sp|P30038-2|AL4A1_HUMAN	P30038-2	AL4A1_HUMAN	ALDH4A1	503	Homo sapiens		Isoform 2 of Delta-1-pyrroline-5-carboxylate dehydrogenase, mitochondrial	1	0.999	1	17	0	17	1	1	1	1	1	2	0	4	1	2	1	2	0	0	0	0	0	0	0	0	0	0	0	0	1	1	1	1	1	2	0	4	1	2	1	2
sp|P30039|PBLD_HUMAN	P30039	PBLD_HUMAN	PBLD	288	Homo sapiens	1:Experimental evidence at protein level	Phenazine biosynthesis-like domain-containing protein	1	0.999	4	14	5	14	4	1	2	1	4	2	0	0	0	0	0	0	1	0	1	1	1	1	0	0	0	0	0	0	4	1	2	1	4	2	0	0	0	0	0	0
sp|P30040|ERP29_HUMAN	P30040	ERP29_HUMAN	ERP29	261	Homo sapiens	1:Experimental evidence at protein level	Endoplasmic reticulum resident protein 29	1	0.999	5	69	69	69	6	6	1	1	11	6	4	3	5	5	9	12	6	6	1	1	11	6	4	3	5	5	9	12	6	6	1	1	11	6	4	3	5	5	9	12
sp|P30041|PRDX6_HUMAN	P30041	PRDX6_HUMAN	PRDX6	224	Homo sapiens	1:Experimental evidence at protein level	Peroxiredoxin-6	1	0.999	8	298	298	298	18	24	35	39	32	29	15	18	21	19	26	22	18	24	35	39	32	29	15	18	21	19	26	22	18	24	35	39	32	29	15	18	21	19	26	22
sp|P30043|BLVRB_HUMAN	P30043	BLVRB_HUMAN	BLVRB	206	Homo sapiens	1:Experimental evidence at protein level	Flavin reductase (NADPH)	1	0.999	6	81	81	81	8	8	5	7	9	5	4	7	7	7	7	7	8	8	5	7	9	5	4	7	7	7	7	7	8	8	5	7	9	5	4	7	7	7	7	7
sp|P30044-2|PRDX5_HUMAN	P30044-2	PRDX5_HUMAN	PRDX5	162	Homo sapiens		Isoform Cytoplasmic+peroxisomal of Peroxiredoxin-5, mitochondrial	1	0.999	6	98	0	98	16	15	3	7	13	7	5	5	6	5	7	9	0	0	0	0	0	0	0	0	0	0	0	0	16	15	3	7	13	7	5	5	6	5	7	9
sp|P30047|GFRP_HUMAN	P30047	GFRP_HUMAN	GCHFR	84	Homo sapiens	1:Experimental evidence at protein level	GTP cyclohydrolase 1 feedback regulatory protein	1	0.999	3	52	15	52	3	5	1	2	4	4	4	4	6	6	6	7	1	1	0	0	1	1	0	1	3	1	3	3	3	5	1	2	4	4	4	4	6	6	6	7
sp|P30048-2|PRDX3_HUMAN	P30048-2	PRDX3_HUMAN	PRDX3	238	Homo sapiens		Isoform 2 of Thioredoxin-dependent peroxide reductase, mitochondrial	1	0.999	7	192	0	192	8	20	16	13	30	21	9	16	13	14	19	13	0	0	0	0	0	0	0	0	0	0	0	0	8	20	16	13	30	21	9	16	13	14	19	13
sp|P30049|ATPD_HUMAN	P30049	ATPD_HUMAN	ATP5F1D	168	Homo sapiens	1:Experimental evidence at protein level	ATP synthase subunit delta, mitochondrial	1	0.999	2	45	45	45	6	3	8	5	3	4	3	3	3	3	2	2	6	3	8	5	3	4	3	3	3	3	2	2	6	3	8	5	3	4	3	3	3	3	2	2
sp|P30050|RL12_HUMAN	P30050	RL12_HUMAN	RPL12	165	Homo sapiens	1:Experimental evidence at protein level	60S ribosomal protein L12	1	0.999	6	73	1	73	8	12	2	3	8	6	4	5	5	5	8	7	0	0	0	0	0	0	0	0	0	0	0	1	8	12	2	3	8	6	4	5	5	5	8	7
sp|P30084|ECHM_HUMAN	P30084	ECHM_HUMAN	ECHS1	290	Homo sapiens	1:Experimental evidence at protein level	Enoyl-CoA hydratase, mitochondrial	1	0.999	10	204	204	204	14	18	22	21	22	20	21	10	15	10	17	14	14	18	22	21	22	20	21	10	15	10	17	14	14	18	22	21	22	20	21	10	15	10	17	14
sp|P30085|KCY_HUMAN	P30085	KCY_HUMAN	CMPK1	196	Homo sapiens	1:Experimental evidence at protein level	UMP-CMP kinase	1	0.999	10	105	0	105	11	13	13	8	12	10	8	3	6	7	6	8	0	0	0	0	0	0	0	0	0	0	0	0	11	13	13	8	12	10	8	3	6	7	6	8
sp|P30086|PEBP1_HUMAN	P30086	PEBP1_HUMAN	PEBP1	187	Homo sapiens	1:Experimental evidence at protein level	Phosphatidylethanolamine-binding protein 1	1	0.999	9	287	287	287	29	32	18	21	22	28	22	22	24	18	25	26	29	32	18	21	22	28	22	22	24	18	25	26	29	32	18	21	22	28	22	22	24	18	25	26
sp|P30101|PDIA3_HUMAN	P30101	PDIA3_HUMAN	PDIA3	505	Homo sapiens	1:Experimental evidence at protein level	Protein disulfide-isomerase A3	1	0.999	26	630	630	630	56	54	20	26	67	58	44	49	63	50	81	62	56	54	20	26	67	58	44	49	63	50	81	62	56	54	20	26	67	58	44	49	63	50	81	62
sp|P30153|2AAA_HUMAN	P30153	2AAA_HUMAN	PPP2R1A	589	Homo sapiens	1:Experimental evidence at protein level	Serine/threonine-protein phosphatase 2A 65 kDa regulatory subunit A alpha isoform	1	0.999	16	268	246	268	23	29	21	25	21	19	16	20	26	21	26	21	21	25	19	24	19	18	13	19	25	20	25	18	23	29	21	25	21	19	16	20	26	21	26	21
sp|P30405|PPIF_HUMAN	P30405	PPIF_HUMAN	PPIF	207	Homo sapiens	1:Experimental evidence at protein level	Peptidyl-prolyl cis-trans isomerase F, mitochondrial	1	0.999	4	64	18	64	5	7	1	3	6	7	4	4	6	6	9	6	2	2	0	0	2	1	0	0	3	3	3	2	5	7	1	3	6	7	4	4	6	6	9	6
sp|P30419|NMT1_HUMAN	P30419	NMT1_HUMAN	NMT1	496	Homo sapiens	1:Experimental evidence at protein level	Glycylpeptide N-tetradecanoyltransferase 1	1	0.999	6	69	8	69	5	4	4	2	8	3	7	4	9	4	10	9	0	1	1	0	1	0	1	0	2	1	1	0	5	4	4	2	8	3	7	4	9	4	10	9
sp|P30519|HMOX2_HUMAN	P30519	HMOX2_HUMAN	HMOX2	316	Homo sapiens	1:Experimental evidence at protein level	Heme oxygenase 2	1	0.999	8	114	35	114	15	9	12	8	9	10	7	10	15	4	8	7	5	2	1	1	1	2	2	5	8	2	4	2	15	9	12	8	9	10	7	10	15	4	8	7
sp|P30520|PURA2_HUMAN	P30520	PURA2_HUMAN	ADSS2	456	Homo sapiens	1:Experimental evidence at protein level	Adenylosuccinate synthetase isozyme 2	1	0.999	4	45	45	45	5	2	8	3	4	1	6	3	3	3	4	3	5	2	8	3	4	1	6	3	3	3	4	3	5	2	8	3	4	1	6	3	3	3	4	3
sp|P30533|AMRP_HUMAN	P30533	AMRP_HUMAN	LRPAP1	357	Homo sapiens	1:Experimental evidence at protein level	Alpha-2-macroglobulin receptor-associated protein	1	0.999	3	16	16	16	0	1	1	0	0	0	0	2	4	3	2	3	0	1	1	0	0	0	0	2	4	3	2	3	0	1	1	0	0	0	0	2	4	3	2	3
sp|P30536|TSPO_HUMAN	P30536	TSPO_HUMAN	TSPO	169	Homo sapiens	1:Experimental evidence at protein level	Translocator protein	0.9447	0.999	1	8	8	8	1	1	0	0	2	1	0	0	0	1	1	1	1	1	0	0	2	1	0	0	0	1	1	1	1	1	0	0	2	1	0	0	0	1	1	1
sp|P30566-2|PUR8_HUMAN	P30566-2	PUR8_HUMAN	ADSL	425	Homo sapiens		Isoform 2 of Adenylosuccinate lyase	1	0.999	4	56	0	56	2	1	6	10	2	4	2	8	3	5	6	7	0	0	0	0	0	0	0	0	0	0	0	0	2	1	6	10	2	4	2	8	3	5	6	7
sp|P30613-2|KPYR_HUMAN	P30613-2	KPYR_HUMAN	PKLR	543	Homo sapiens		Isoform L-type of Pyruvate kinase PKLR	1	0.999	2	8	0	8	0	0	1	1	0	2	0	0	1	1	0	2	0	0	0	0	0	0	0	0	0	0	0	0	0	0	1	1	0	2	0	0	1	1	0	2
sp|P30622-1|CLIP1_HUMAN	P30622-1	CLIP1_HUMAN	CLIP1	1427	Homo sapiens		Isoform 2 of CAP-Gly domain-containing linker protein 1	1	0.999	10	20	0	20	2	1	7	9	0	1	0	0	0	0	0	0	0	0	0	0	0	0	0	0	0	0	0	0	2	1	7	9	0	1	0	0	0	0	0	0
sp|P30626-2|SORCN_HUMAN	P30626-2	SORCN_HUMAN	SRI	183	Homo sapiens		Isoform 2 of Sorcin	1	0.999	3	48	0	48	4	3	4	4	6	2	3	6	4	5	3	4	0	0	0	0	0	0	0	0	0	0	0	0	4	3	4	4	6	2	3	6	4	5	3	4
sp|P30711|GSTT1_HUMAN	P30711	GSTT1_HUMAN	GSTT1	240	Homo sapiens	1:Experimental evidence at protein level	Glutathione S-transferase theta-1	1	0.999	5	34	24	34	2	2	8	7	3	4	1	2	2	2	1	0	2	2	3	5	2	3	1	2	2	1	1	0	2	2	8	7	3	4	1	2	2	2	1	0
sp|P30740|ILEU_HUMAN	P30740	ILEU_HUMAN	SERPINB1	379	Homo sapiens	1:Experimental evidence at protein level	Leukocyte elastase inhibitor	1	0.999	14	355	267	355	29	34	58	51	37	32	15	18	19	22	19	21	21	25	51	46	24	25	10	9	13	17	12	14	29	34	58	51	37	32	15	18	19	22	19	21
sp|P30825|CTR1_HUMAN	P30825	CTR1_HUMAN	SLC7A1	629	Homo sapiens	1:Experimental evidence at protein level	High affinity cationic amino acid transporter 1	0.9069	0.9982	1	1	1	1	0	0	1	0	0	0	0	0	0	0	0	0	0	0	1	0	0	0	0	0	0	0	0	0	0	0	1	0	0	0	0	0	0	0	0	0
sp|P30837|AL1B1_HUMAN	P30837	AL1B1_HUMAN	ALDH1B1	517	Homo sapiens	1:Experimental evidence at protein level	Aldehyde dehydrogenase X, mitochondrial	1	0.999	6	52	52	58	3	3	1	1	5	5	5	8	3	6	6	6	3	3	1	1	5	5	5	8	3	6	6	6	6	4	1	1	6	6	5	8	3	6	6	6
sp|P30838|AL3A1_HUMAN	P30838	AL3A1_HUMAN	ALDH3A1	453	Homo sapiens	1:Experimental evidence at protein level	Aldehyde dehydrogenase, dimeric NADP-preferring	1	0.999	8	49	49	61	5	3	2	2	8	5	5	2	4	3	6	4	5	3	2	2	8	5	5	2	4	3	6	4	6	4	3	3	10	6	5	2	5	5	7	5
sp|P30876|RPB2_HUMAN	P30876	RPB2_HUMAN	POLR2B	1174	Homo sapiens	1:Experimental evidence at protein level	DNA-directed RNA polymerase II subunit RPB2	1	0.999	8	48	48	48	2	4	4	5	5	3	0	5	5	5	5	5	2	4	4	5	5	3	0	5	5	5	5	5	2	4	4	5	5	3	0	5	5	5	5	5
sp|P31040|SDHA_HUMAN	P31040	SDHA_HUMAN	SDHA	664	Homo sapiens	1:Experimental evidence at protein level	Succinate dehydrogenase [ubiquinone] flavoprotein subunit, mitochondrial	1	0.999	20	378	4	378	26	34	42	40	41	31	26	26	29	30	27	26	0	1	1	0	2	0	0	0	0	0	0	0	26	34	42	40	41	31	26	26	29	30	27	26
sp|P31150|GDIA_HUMAN	P31150	GDIA_HUMAN	GDI1	447	Homo sapiens	1:Experimental evidence at protein level	Rab GDP dissociation inhibitor alpha	1	0.999	11	75	75	244	6	14	2	1	9	5	6	6	6	6	7	7	6	14	2	1	9	5	6	6	6	6	7	7	17	26	33	22	26	18	14	17	16	14	20	21
sp|P31153|METK2_HUMAN	P31153	METK2_HUMAN	MAT2A	395	Homo sapiens	1:Experimental evidence at protein level	S-adenosylmethionine synthase isoform type-2	1	0.999	7	104	29	104	10	9	7	5	11	7	8	12	11	7	10	7	3	4	1	0	1	1	4	5	4	2	3	1	10	9	7	5	11	7	8	12	11	7	10	7
sp|P31350-2|RIR2_HUMAN	P31350-2	RIR2_HUMAN	RRM2	449	Homo sapiens		Isoform 2 of Ribonucleoside-diphosphate reductase subunit M2	0.9984	0.999	1	3	0	3	0	0	0	0	0	0	0	0	1	1	0	1	0	0	0	0	0	0	0	0	0	0	0	0	0	0	0	0	0	0	0	0	1	1	0	1
sp|P31483-2|TIA1_HUMAN	P31483-2	TIA1_HUMAN	TIA1	375	Homo sapiens		Isoform Short of Cytotoxic granule associated RNA binding protein TIA1	1	0.999	2	4	0	13	0	0	1	1	0	0	0	0	0	0	0	2	0	0	0	0	0	0	0	0	0	0	0	0	2	2	1	1	1	0	0	0	0	1	1	4
sp|P31689|DNJA1_HUMAN	P31689	DNJA1_HUMAN	DNAJA1	397	Homo sapiens	1:Experimental evidence at protein level	DnaJ homolog subfamily A member 1	1	0.999	6	72	25	72	6	7	9	7	6	3	3	7	7	3	6	8	2	3	5	4	3	1	1	1	1	1	2	1	6	7	9	7	6	3	3	7	7	3	6	8
sp|P31749|AKT1_HUMAN	P31749	AKT1_HUMAN	AKT1	480	Homo sapiens	1:Experimental evidence at protein level	RAC-alpha serine/threonine-protein kinase	1	0.999	7	29	3	29	0	0	5	2	3	2	0	3	3	4	5	2	0	0	0	0	1	0	0	0	1	1	0	0	0	0	5	2	3	2	0	3	3	4	5	2
sp|P31930|QCR1_HUMAN	P31930	QCR1_HUMAN	UQCRC1	480	Homo sapiens	1:Experimental evidence at protein level	Cytochrome b-c1 complex subunit 1, mitochondrial	1	0.999	13	218	218	218	19	23	23	29	22	17	14	13	16	14	17	11	19	23	23	29	22	17	14	13	16	14	17	11	19	23	23	29	22	17	14	13	16	14	17	11
sp|P31937|3HIDH_HUMAN	P31937	3HIDH_HUMAN	HIBADH	336	Homo sapiens	1:Experimental evidence at protein level	3-hydroxyisobutyrate dehydrogenase, mitochondrial	1	0.999	6	70	70	70	6	10	0	0	10	7	4	4	4	8	9	8	6	10	0	0	10	7	4	4	4	8	9	8	6	10	0	0	10	7	4	4	4	8	9	8
sp|P31939-2|PUR9_HUMAN	P31939-2	PUR9_HUMAN	ATIC	591	Homo sapiens		Isoform 2 of Bifunctional purine biosynthesis protein ATIC	1	0.999	16	346	0	346	31	21	10	8	23	20	32	31	36	52	41	41	0	0	0	0	0	0	0	0	0	0	0	0	31	21	10	8	23	20	32	31	36	52	41	41
sp|P31942|HNRH3_HUMAN	P31942	HNRH3_HUMAN	HNRNPH3	346	Homo sapiens	1:Experimental evidence at protein level	Heterogeneous nuclear ribonucleoprotein H3	1	0.999	10	166	0	166	13	16	13	15	16	12	13	8	12	16	18	14	0	0	0	0	0	0	0	0	0	0	0	0	13	16	13	15	16	12	13	8	12	16	18	14
sp|P31943|HNRH1_HUMAN	P31943	HNRH1_HUMAN	HNRNPH1	449	Homo sapiens	1:Experimental evidence at protein level	Heterogeneous nuclear ribonucleoprotein H	1	0.999	15	282	121	395	17	23	20	18	14	18	17	21	31	31	40	32	5	5	10	8	6	7	4	13	11	17	21	14	30	39	20	18	20	24	32	22	47	41	51	51
sp|P31946-2|1433B_HUMAN	P31946-2	1433B_HUMAN	YWHAB	244	Homo sapiens		Isoform Short of 14-3-3 protein beta/alpha	0.9999	0.999	10	16	16	785	1	2	2	2	2	2	0	0	1	2	1	1	1	2	2	2	2	2	0	0	1	2	1	1	81	90	41	30	81	65	74	41	73	55	89	65
sp|P31946|1433B_HUMAN	P31946	1433B_HUMAN	YWHAB	246	Homo sapiens	1:Experimental evidence at protein level	14-3-3 protein beta/alpha	1	0.999	11	367	14	783	42	42	20	16	37	29	40	19	28	28	32	34	3	0	0	0	3	1	0	0	2	2	2	1	83	88	39	28	82	64	74	41	74	55	90	65
sp|P31947|1433S_HUMAN	P31947	1433S_HUMAN	SFN	248	Homo sapiens	1:Experimental evidence at protein level	14-3-3 protein sigma	1	0.999	11	324	52	678	26	22	35	37	34	40	19	20	23	24	23	21	4	2	13	13	2	2	3	2	2	2	4	3	61	64	48	44	76	68	51	37	63	45	74	47
sp|P31948|STIP1_HUMAN	P31948	STIP1_HUMAN	STIP1	543	Homo sapiens	1:Experimental evidence at protein level	Stress-induced-phosphoprotein 1	1	0.999	22	451	0	451	41	47	20	16	48	30	34	38	47	44	46	40	0	0	0	0	0	0	0	0	0	0	0	0	41	47	20	16	48	30	34	38	47	44	46	40
sp|P31949|S10AB_HUMAN	P31949	S10AB_HUMAN	S100A11	105	Homo sapiens	1:Experimental evidence at protein level	Protein S100-A11	1	0.999	4	128	128	128	11	11	27	6	9	9	6	6	7	12	7	17	11	11	27	6	9	9	6	6	7	12	7	17	11	11	27	6	9	9	6	6	7	12	7	17
sp|P32119|PRDX2_HUMAN	P32119	PRDX2_HUMAN	PRDX2	198	Homo sapiens	1:Experimental evidence at protein level	Peroxiredoxin-2	1	0.999	7	203	203	203	18	17	12	9	30	28	14	16	15	18	14	12	18	17	12	9	30	28	14	16	15	18	14	12	18	17	12	9	30	28	14	16	15	18	14	12
sp|P32189-1|GLPK_HUMAN	P32189-1	GLPK_HUMAN	GK	524	Homo sapiens		Isoform 1 of Glycerol kinase	0.9469	0.999	1	2	0	2	0	0	0	0	2	0	0	0	0	0	0	0	0	0	0	0	0	0	0	0	0	0	0	0	0	0	0	0	2	0	0	0	0	0	0	0
sp|P32320|CDD_HUMAN	P32320	CDD_HUMAN	CDA	146	Homo sapiens	1:Experimental evidence at protein level	Cytidine deaminase	1	0.999	3	22	22	22	3	2	1	0	3	5	0	0	3	1	2	2	3	2	1	0	3	5	0	0	3	1	2	2	3	2	1	0	3	5	0	0	3	1	2	2
sp|P32321-2|DCTD_HUMAN	P32321-2	DCTD_HUMAN	DCTD	189	Homo sapiens		Isoform 2 of Deoxycytidylate deaminase	1	0.999	4	43	0	43	2	3	4	5	5	5	5	3	3	3	3	2	0	0	0	0	0	0	0	0	0	0	0	0	2	3	4	5	5	5	5	3	3	3	3	2
sp|P32322-2|P5CR1_HUMAN	P32322-2	P5CR1_HUMAN	PYCR1	316	Homo sapiens		Isoform 2 of Pyrroline-5-carboxylate reductase 1, mitochondrial	1	0.999	4	23	0	23	3	4	2	3	0	1	0	4	1	2	2	1	0	0	0	0	0	0	0	0	0	0	0	0	3	4	2	3	0	1	0	4	1	2	2	1
sp|P32455|GBP1_HUMAN	P32455	GBP1_HUMAN	GBP1	592	Homo sapiens	1:Experimental evidence at protein level	Guanylate-binding protein 1	1	0.999	2	10	0	10	0	2	1	4	1	2	0	0	0	0	0	0	0	0	0	0	0	0	0	0	0	0	0	0	0	2	1	4	1	2	0	0	0	0	0	0
sp|P32519-2|ELF1_HUMAN	P32519-2	ELF1_HUMAN	ELF1	595	Homo sapiens		Isoform 2 of ETS-related transcription factor Elf-1	1	0.999	3	6	0	6	0	1	2	0	0	0	0	2	0	1	0	0	0	0	0	0	0	0	0	0	0	0	0	0	0	1	2	0	0	0	0	2	0	1	0	0
sp|P32929-2|CGL_HUMAN	P32929-2	CGL_HUMAN	CTH	361	Homo sapiens		Isoform 2 of Cystathionine gamma-lyase	0.8749	0.9975	1	1	0	1	0	0	0	1	0	0	0	0	0	0	0	0	0	0	0	0	0	0	0	0	0	0	0	0	0	0	0	1	0	0	0	0	0	0	0	0
sp|P32969|RL9_HUMAN	P32969	RL9_HUMAN	RPL9	192	Homo sapiens	1:Experimental evidence at protein level	60S ribosomal protein L9	1	0.999	7	82	82	82	9	4	7	8	9	6	7	4	6	6	9	7	9	4	7	8	9	6	7	4	6	6	9	7	9	4	7	8	9	6	7	4	6	6	9	7
sp|P33121-2|ACSL1_HUMAN	P33121-2	ACSL1_HUMAN	ACSL1	688	Homo sapiens		Isoform 2 of Long-chain-fatty-acid--CoA ligase 1	1	0.999	5	12	0	12	0	0	0	0	1	2	0	0	2	3	2	2	0	0	0	0	0	0	0	0	0	0	0	0	0	0	0	0	1	2	0	0	2	3	2	2
sp|P33176|KINH_HUMAN	P33176	KINH_HUMAN	KIF5B	963	Homo sapiens	1:Experimental evidence at protein level	Kinesin-1 heavy chain	1	0.999	28	331	273	331	32	32	19	21	28	29	16	22	36	26	33	37	22	24	17	18	22	25	14	17	33	21	29	31	32	32	19	21	28	29	16	22	36	26	33	37
sp|P33240-2|CSTF2_HUMAN	P33240-2	CSTF2_HUMAN	CSTF2	560	Homo sapiens		Isoform 2 of Cleavage stimulation factor subunit 2	1	0.999	4	13	0	13	3	1	1	4	2	0	0	0	0	0	2	0	0	0	0	0	0	0	0	0	0	0	0	0	3	1	1	4	2	0	0	0	0	0	2	0
sp|P33316|DUT_HUMAN	P33316	DUT_HUMAN	DUT	252	Homo sapiens	1:Experimental evidence at protein level	Deoxyuridine 5'-triphosphate nucleotidohydrolase, mitochondrial	1	0.999	5	10	3	10	0	3	1	2	1	1	1	0	0	0	1	0	0	1	0	0	1	1	0	0	0	0	0	0	0	3	1	2	1	1	1	0	0	0	1	0
sp|P33527-2|MRP1_HUMAN	P33527-2	MRP1_HUMAN	ABCC1	1472	Homo sapiens		Isoform 2 of Multidrug resistance-associated protein 1	1	0.999	5	8	0	9	0	0	2	1	0	1	0	0	0	1	2	1	0	0	0	0	0	0	0	0	0	0	0	0	0	0	2	1	0	2	0	0	0	1	2	1
sp|P33947-2|ERD22_HUMAN	P33947-2	ERD22_HUMAN	KDELR2	186	Homo sapiens		Isoform 2 of ER lumen protein-retaining receptor 2	1	0.999	4	28	0	28	4	3	6	5	1	2	0	2	2	2	1	0	0	0	0	0	0	0	0	0	0	0	0	0	4	3	6	5	1	2	0	2	2	2	1	0
sp|P33991|MCM4_HUMAN	P33991	MCM4_HUMAN	MCM4	863	Homo sapiens	1:Experimental evidence at protein level	DNA replication licensing factor MCM4	1	0.999	11	87	87	87	0	0	1	1	0	0	12	9	17	14	15	18	0	0	1	1	0	0	12	9	17	14	15	18	0	0	1	1	0	0	12	9	17	14	15	18
sp|P33992|MCM5_HUMAN	P33992	MCM5_HUMAN	MCM5	734	Homo sapiens	1:Experimental evidence at protein level	DNA replication licensing factor MCM5	1	0.999	8	46	46	46	0	0	2	3	0	0	5	9	7	6	8	6	0	0	2	3	0	0	5	9	7	6	8	6	0	0	2	3	0	0	5	9	7	6	8	6
sp|P33993|MCM7_HUMAN	P33993	MCM7_HUMAN	MCM7	719	Homo sapiens	1:Experimental evidence at protein level	DNA replication licensing factor MCM7	1	0.999	10	82	0	82	0	2	2	1	1	0	12	12	8	12	15	17	0	0	0	0	0	0	0	0	0	0	0	0	0	2	2	1	1	0	12	12	8	12	15	17
sp|P34059|GALNS_HUMAN	P34059	GALNS_HUMAN	GALNS	522	Homo sapiens	1:Experimental evidence at protein level	N-acetylgalactosamine-6-sulfatase	1	0.999	2	6	6	6	0	0	2	3	0	0	0	0	0	0	0	1	0	0	2	3	0	0	0	0	0	0	0	1	0	0	2	3	0	0	0	0	0	0	0	1
sp|P34096|RNAS4_HUMAN	P34096	RNAS4_HUMAN	RNASE4	147	Homo sapiens	1:Experimental evidence at protein level	Ribonuclease 4	0.9999	0.9969	2	2	2	2	0	0	1	0	1	0	0	0	0	0	0	0	0	0	1	0	1	0	0	0	0	0	0	0	0	0	1	0	1	0	0	0	0	0	0	0
sp|P34896-2|GLYC_HUMAN	P34896-2	GLYC_HUMAN	SHMT1	444	Homo sapiens		Isoform 2 of Serine hydroxymethyltransferase, cytosolic	1	0.999	4	33	0	34	3	3	0	0	2	0	2	1	6	3	7	6	0	0	0	0	0	0	0	0	0	0	0	0	3	4	0	0	2	0	2	1	6	3	7	6
sp|P34896-4|GLYC_HUMAN	P34896-4	GLYC_HUMAN	SHMT1	345	Homo sapiens		Isoform 4 of Serine hydroxymethyltransferase, cytosolic	0.9969	0.9979	3	3	3	20	0	0	0	0	1	1	0	0	0	0	0	1	0	0	0	0	1	1	0	0	0	0	0	1	1	3	0	0	1	1	0	0	5	1	3	5
sp|P34897-3|GLYM_HUMAN	P34897-3	GLYM_HUMAN	SHMT2	483	Homo sapiens		Isoform 3 of Serine hydroxymethyltransferase, mitochondrial	1	0.999	13	265	0	265	20	20	21	12	37	28	15	17	19	19	25	32	0	0	0	0	0	0	0	0	0	0	0	0	20	20	21	12	37	28	15	17	19	19	25	32
sp|P34932|HSP74_HUMAN	P34932	HSP74_HUMAN	HSPA4	840	Homo sapiens	1:Experimental evidence at protein level	Heat shock 70 kDa protein 4	1	0.999	34	435	402	435	45	47	18	25	37	39	28	28	39	46	37	46	38	42	18	25	34	36	27	28	37	43	33	41	45	47	18	25	37	39	28	28	39	46	37	46
sp|P34949|MPI_HUMAN	P34949	MPI_HUMAN	MPI	423	Homo sapiens	1:Experimental evidence at protein level	Mannose-6-phosphate isomerase	1	0.999	5	24	10	24	4	3	3	3	6	3	0	0	0	1	1	0	0	2	1	2	2	2	0	0	0	0	1	0	4	3	3	3	6	3	0	0	0	1	1	0
sp|P35080|PROF2_HUMAN	P35080	PROF2_HUMAN	PFN2	140	Homo sapiens	1:Experimental evidence at protein level	Profilin-2	1	0.999	2	20	1	20	1	2	1	3	1	1	2	3	1	3	1	1	0	0	0	1	0	0	0	0	0	0	0	0	1	2	1	3	1	1	2	3	1	3	1	1
sp|P35221-2|CTNA1_HUMAN	P35221-2	CTNA1_HUMAN	CTNNA1	930	Homo sapiens		Isoform 2 of Catenin alpha-1	1	0.999	26	393	0	393	35	45	29	25	45	47	26	25	30	28	31	27	0	0	0	0	0	0	0	0	0	0	0	0	35	45	29	25	45	47	26	25	30	28	31	27
sp|P35222|CTNB1_HUMAN	P35222	CTNB1_HUMAN	CTNNB1	781	Homo sapiens	1:Experimental evidence at protein level	Catenin beta-1	1	0.999	22	439	304	439	27	34	52	47	47	46	26	29	33	32	32	34	24	30	20	23	34	31	19	21	27	25	23	27	27	34	52	47	47	46	26	29	33	32	32	34
sp|P35226|BMI1_HUMAN	P35226	BMI1_HUMAN	BMI1	326	Homo sapiens	1:Experimental evidence at protein level	Polycomb complex protein BMI-1	0.9469	0.999	1	7	7	7	1	1	0	0	1	0	1	0	0	0	2	1	1	1	0	0	1	0	1	0	0	0	2	1	1	1	0	0	1	0	1	0	0	0	2	1
sp|P35232|PHB1_HUMAN	P35232	PHB1_HUMAN	PHB1	272	Homo sapiens	1:Experimental evidence at protein level	Prohibitin 1	1	0.999	9	154	72	154	10	10	28	20	19	14	8	5	12	9	9	10	4	4	18	15	9	5	3	1	4	3	3	3	10	10	28	20	19	14	8	5	12	9	9	10
sp|P35237|SPB6_HUMAN	P35237	SPB6_HUMAN	SERPINB6	376	Homo sapiens	1:Experimental evidence at protein level	Serpin B6	1	0.999	8	72	72	72	1	0	1	0	1	2	8	11	9	11	13	15	1	0	1	0	1	2	8	11	9	11	13	15	1	0	1	0	1	2	8	11	9	11	13	15
sp|P35241-5|RADI_HUMAN	P35241-5	RADI_HUMAN	RDX	604	Homo sapiens		Isoform 5 of Radixin	1	0.999	13	9	0	122	0	0	1	0	0	0	2	1	2	1	1	1	0	0	0	0	0	0	0	0	0	0	0	0	10	10	7	14	14	6	8	8	9	10	14	12
sp|P35244|RFA3_HUMAN	P35244	RFA3_HUMAN	RPA3	121	Homo sapiens	1:Experimental evidence at protein level	Replication protein A 14 kDa subunit	1	0.999	4	30	30	30	1	3	3	1	4	2	2	2	1	2	5	4	1	3	3	1	4	2	2	2	1	2	5	4	1	3	3	1	4	2	2	2	1	2	5	4
sp|P35249-2|RFC4_HUMAN	P35249-2	RFC4_HUMAN	RFC4	303	Homo sapiens		Isoform 2 of Replication factor C subunit 4	1	0.9987	2	2	0	2	0	0	0	0	0	0	0	0	0	2	0	0	0	0	0	0	0	0	0	0	0	0	0	0	0	0	0	0	0	0	0	0	0	2	0	0
sp|P35268|RL22_HUMAN	P35268	RL22_HUMAN	RPL22	128	Homo sapiens	1:Experimental evidence at protein level	60S ribosomal protein L22	1	0.999	2	28	28	28	2	4	0	0	4	2	3	0	3	1	3	6	2	4	0	0	4	2	3	0	3	1	3	6	2	4	0	0	4	2	3	0	3	1	3	6
sp|P35269|T2FA_HUMAN	P35269	T2FA_HUMAN	GTF2F1	517	Homo sapiens	1:Experimental evidence at protein level	General transcription factor IIF subunit 1	1	0.999	5	30	30	30	4	4	1	4	2	1	2	3	1	3	2	3	4	4	1	4	2	1	2	3	1	3	2	3	4	4	1	4	2	1	2	3	1	3	2	3
sp|P35270|SPRE_HUMAN	P35270	SPRE_HUMAN	SPR	261	Homo sapiens	1:Experimental evidence at protein level	Sepiapterin reductase	1	0.999	4	47	47	47	4	4	2	2	5	5	4	2	4	7	3	5	4	4	2	2	5	5	4	2	4	7	3	5	4	4	2	2	5	5	4	2	4	7	3	5
sp|P35503-3|UD13_HUMAN	P35503-3	UD13_HUMAN	UGT1A3	445	Homo sapiens		Isoform 2 of UDP-glucuronosyltransferase 1A3	0.9956	0.9988	2	3	0	5	0	0	1	2	0	0	0	0	0	0	0	0	0	0	0	0	0	0	0	0	0	0	0	0	0	2	1	2	0	0	0	0	0	0	0	0
sp|P35527|K1C9_HUMAN	P35527	K1C9_HUMAN	KRT9	623	Homo sapiens	1:Experimental evidence at protein level	Keratin, type I cytoskeletal 9	0.9998	0.999	2	2	2	2	0	2	0	0	0	0	0	0	0	0	0	0	0	2	0	0	0	0	0	0	0	0	0	0	0	2	0	0	0	0	0	0	0	0	0	0
sp|P35573-2|GDE_HUMAN	P35573-2	GDE_HUMAN	AGL	1515	Homo sapiens		Isoform 5 of Glycogen debranching enzyme	1	0.999	7	21	0	21	0	2	4	5	3	3	1	0	1	2	0	0	0	0	0	0	0	0	0	0	0	0	0	0	0	2	4	5	3	3	1	0	1	2	0	0
sp|P35579|MYH9_HUMAN	P35579	MYH9_HUMAN	MYH9	1960	Homo sapiens	1:Experimental evidence at protein level	Myosin-9	1	0.999	118	3058	1406	3058	246	274	220	202	323	274	271	208	247	249	272	272	99	121	110	91	153	129	112	112	109	132	123	115	246	274	220	202	323	274	271	208	247	249	272	272
sp|P35580-2|MYH10_HUMAN	P35580-2	MYH10_HUMAN	MYH10	1992	Homo sapiens		Isoform 2 of Myosin-10	1	0.999	34	82	0	367	6	8	8	2	6	4	1	9	7	8	12	11	0	0	0	0	0	0	0	0	0	0	0	0	36	41	27	19	42	27	20	23	31	28	39	34
sp|P35606|COPB2_HUMAN	P35606	COPB2_HUMAN	COPB2	906	Homo sapiens	1:Experimental evidence at protein level	Coatomer subunit beta'	1	0.999	17	232	2	232	19	27	16	13	27	14	17	15	20	21	21	22	0	2	0	0	0	0	0	0	0	0	0	0	19	27	16	13	27	14	17	15	20	21	21	22
sp|P35611-2|ADDA_HUMAN	P35611-2	ADDA_HUMAN	ADD1	631	Homo sapiens		Isoform 2 of Alpha-adducin	1	0.999	7	47	0	47	2	7	5	6	6	6	1	4	3	1	2	4	0	0	0	0	0	0	0	0	0	0	0	0	2	7	5	6	6	6	1	4	3	1	2	4
sp|P35613-2|BASI_HUMAN	P35613-2	BASI_HUMAN	BSG	269	Homo sapiens		Isoform 2 of Basigin	1	0.999	5	81	0	81	9	6	4	4	7	8	6	6	6	10	7	8	0	0	0	0	0	0	0	0	0	0	0	0	9	6	4	4	7	8	6	6	6	10	7	8
sp|P35637-2|FUS_HUMAN	P35637-2	FUS_HUMAN	FUS	525	Homo sapiens		Isoform Short of RNA-binding protein FUS	1	0.999	3	26	0	26	1	1	0	0	0	1	6	4	3	3	4	3	0	0	0	0	0	0	0	0	0	0	0	0	1	1	0	0	0	1	6	4	3	3	4	3
sp|P35658-2|NU214_HUMAN	P35658-2	NU214_HUMAN	NUP214	2079	Homo sapiens		Isoform 2 of Nuclear pore complex protein Nup214	1	0.999	9	63	0	63	9	3	4	4	6	6	1	8	5	5	4	8	0	0	0	0	0	0	0	0	0	0	0	0	9	3	4	4	6	6	1	8	5	5	4	8
sp|P35659-2|DEK_HUMAN	P35659-2	DEK_HUMAN	DEK	341	Homo sapiens		Isoform 2 of Protein DEK	1	0.999	9	43	0	43	3	3	10	4	2	4	1	3	3	4	3	3	0	0	0	0	0	0	0	0	0	0	0	0	3	3	10	4	2	4	1	3	3	4	3	3
sp|P35749-2|MYH11_HUMAN	P35749-2	MYH11_HUMAN	MYH11	1979	Homo sapiens		Isoform 2 of Myosin-11	1	0.9982	16	4	0	270	0	0	2	1	0	0	1	0	0	0	0	0	0	0	0	0	0	0	0	0	0	0	0	0	25	29	14	15	29	23	23	15	17	17	30	33
sp|P35754|GLRX1_HUMAN	P35754	GLRX1_HUMAN	GLRX	106	Homo sapiens	1:Experimental evidence at protein level	Glutaredoxin-1	1	0.999	3	18	18	18	2	3	2	3	1	1	1	1	1	1	1	1	2	3	2	3	1	1	1	1	1	1	1	1	2	3	2	3	1	1	1	1	1	1	1	1
sp|P35813-2|PPM1A_HUMAN	P35813-2	PPM1A_HUMAN	PPM1A	324	Homo sapiens		Isoform Alpha-2 of Protein phosphatase 1A	1	0.999	6	20	0	20	2	5	3	2	1	2	0	0	0	1	2	2	0	0	0	0	0	0	0	0	0	0	0	0	2	5	3	2	1	2	0	0	0	1	2	2
sp|P35869|AHR_HUMAN	P35869	AHR_HUMAN	AHR	848	Homo sapiens	1:Experimental evidence at protein level	Aryl hydrocarbon receptor	1	0.999	2	13	13	13	1	2	2	4	2	1	0	1	0	0	0	0	1	2	2	4	2	1	0	1	0	0	0	0	1	2	2	4	2	1	0	1	0	0	0	0
sp|P35900|K1C20_HUMAN	P35900	K1C20_HUMAN	KRT20	424	Homo sapiens	1:Experimental evidence at protein level	Keratin, type I cytoskeletal 20	1	0.999	16	66	55	72	8	9	17	16	11	5	0	0	0	0	0	0	6	7	15	14	9	4	0	0	0	0	0	0	10	10	18	16	13	5	0	0	0	0	0	0
sp|P35908|K22E_HUMAN	P35908	K22E_HUMAN	KRT2	639	Homo sapiens	1:Experimental evidence at protein level	Keratin, type II cytoskeletal 2 epidermal	1	0.999	9	51	6	96	5	3	5	4	13	6	3	1	2	2	4	3	0	0	0	0	4	2	0	0	0	0	0	0	11	6	9	12	15	9	6	5	6	5	7	5
sp|P35914-2|HMGCL_HUMAN	P35914-2	HMGCL_HUMAN	HMGCL	254	Homo sapiens		Isoform 2 of Hydroxymethylglutaryl-CoA lyase, mitochondrial	0.9469	0.999	1	3	0	3	1	0	0	0	1	1	0	0	0	0	0	0	0	0	0	0	0	0	0	0	0	0	0	0	1	0	0	0	1	1	0	0	0	0	0	0
sp|P35998|PRS7_HUMAN	P35998	PRS7_HUMAN	PSMC2	433	Homo sapiens	1:Experimental evidence at protein level	26S proteasome regulatory subunit 7	1	0.999	13	88	12	88	9	6	8	9	12	7	5	4	7	9	6	6	2	0	1	1	5	1	0	0	1	0	1	0	9	6	8	9	12	7	5	4	7	9	6	6
sp|P36405|ARL3_HUMAN	P36405	ARL3_HUMAN	ARL3	182	Homo sapiens	1:Experimental evidence at protein level	ADP-ribosylation factor-like protein 3	1	0.999	3	38	38	38	7	1	0	0	5	1	2	4	2	5	5	6	7	1	0	0	5	1	2	4	2	5	5	6	7	1	0	0	5	1	2	4	2	5	5	6
sp|P36507|MP2K2_HUMAN	P36507	MP2K2_HUMAN	MAP2K2	400	Homo sapiens	1:Experimental evidence at protein level	Dual specificity mitogen-activated protein kinase kinase 2	1	0.999	10	100	52	100	6	8	10	8	10	11	5	5	9	9	10	9	4	5	9	6	4	5	2	3	3	4	3	4	6	8	10	8	10	11	5	5	9	9	10	9
sp|P36542-2|ATPG_HUMAN	P36542-2	ATPG_HUMAN	ATP5F1C	297	Homo sapiens		Isoform Heart of ATP synthase subunit gamma, mitochondrial	1	0.999	7	92	0	92	9	6	4	3	10	6	15	12	8	9	5	5	0	0	0	0	0	0	0	0	0	0	0	0	9	6	4	3	10	6	15	12	8	9	5	5
sp|P36543|VATE1_HUMAN	P36543	VATE1_HUMAN	ATP6V1E1	226	Homo sapiens	1:Experimental evidence at protein level	V-type proton ATPase subunit E 1	1	0.999	3	25	0	25	1	0	1	3	2	3	1	3	3	2	4	2	0	0	0	0	0	0	0	0	0	0	0	0	1	0	1	3	2	3	1	3	3	2	4	2
sp|P36551|HEM6_HUMAN	P36551	HEM6_HUMAN	CPOX	454	Homo sapiens	1:Experimental evidence at protein level	Oxygen-dependent coproporphyrinogen-III oxidase, mitochondrial	1	0.999	10	109	70	109	6	6	11	7	10	7	13	9	10	6	12	12	4	4	4	3	8	5	10	5	7	4	8	8	6	6	11	7	10	7	13	9	10	6	12	12
sp|P36578|RL4_HUMAN	P36578	RL4_HUMAN	RPL4	427	Homo sapiens	1:Experimental evidence at protein level	60S ribosomal protein L4	1	0.999	8	91	91	91	8	12	3	3	14	7	4	4	8	5	15	8	8	12	3	3	14	7	4	4	8	5	15	8	8	12	3	3	14	7	4	4	8	5	15	8
sp|P36639-1|8ODP_HUMAN	P36639-1	8ODP_HUMAN	NUDT1	197	Homo sapiens		Isoform p26 of Oxidized purine nucleoside triphosphate hydrolase	0.9469	0.999	1	13	0	13	1	0	0	0	0	1	0	4	2	1	2	2	0	0	0	0	0	0	0	0	0	0	0	0	1	0	0	0	0	1	0	4	2	1	2	2
sp|P36776-2|LONM_HUMAN	P36776-2	LONM_HUMAN	LONP1	895	Homo sapiens		Isoform 2 of Lon protease homolog, mitochondrial	1	0.999	11	89	0	89	9	10	7	5	17	11	5	6	4	5	4	6	0	0	0	0	0	0	0	0	0	0	0	0	9	10	7	5	17	11	5	6	4	5	4	6
sp|P36871|PGM1_HUMAN	P36871	PGM1_HUMAN	PGM1	562	Homo sapiens	1:Experimental evidence at protein level	Phosphoglucomutase-1	1	0.999	9	72	19	72	8	15	5	6	7	4	2	3	5	6	8	3	3	4	1	1	3	1	1	0	1	1	3	0	8	15	5	6	7	4	2	3	5	6	8	3
sp|P36873-2|PP1G_HUMAN	P36873-2	PP1G_HUMAN	PPP1CC	337	Homo sapiens		Isoform 2 of Serine/threonine-protein phosphatase PP1-gamma catalytic subunit	1	0.999	13	55	0	257	6	6	7	5	4	8	2	3	3	3	2	6	0	0	0	0	0	0	0	0	0	0	0	0	20	20	12	8	22	23	24	25	23	29	22	29
sp|P36941-2|TNR3_HUMAN	P36941-2	TNR3_HUMAN	LTBR	416	Homo sapiens		Isoform 2 of Tumor necrosis factor receptor superfamily member 3	0.6101	0.9887	1	1	0	1	0	0	0	0	0	0	0	1	0	0	0	0	0	0	0	0	0	0	0	0	0	0	0	0	0	0	0	0	0	0	0	1	0	0	0	0
sp|P36952|SPB5_HUMAN	P36952	SPB5_HUMAN	SERPINB5	375	Homo sapiens	1:Experimental evidence at protein level	Serpin B5	1	0.999	10	193	108	193	16	22	14	17	20	19	11	12	17	17	13	15	10	13	11	14	8	8	7	6	8	7	9	7	16	22	14	17	20	19	11	12	17	17	13	15
sp|P36954|RPB9_HUMAN	P36954	RPB9_HUMAN	POLR2I	125	Homo sapiens	1:Experimental evidence at protein level	DNA-directed RNA polymerase II subunit RPB9	0.9469	0.999	1	13	13	13	0	0	0	0	1	1	0	1	4	1	2	3	0	0	0	0	1	1	0	1	4	1	2	3	0	0	0	0	1	1	0	1	4	1	2	3
sp|P36957|ODO2_HUMAN	P36957	ODO2_HUMAN	DLST	453	Homo sapiens	1:Experimental evidence at protein level	Dihydrolipoyllysine-residue succinyltransferase component of 2-oxoglutarate dehydrogenase complex, mitochondrial	1	0.999	4	52	0	52	3	5	1	2	7	3	5	3	5	6	6	6	0	0	0	0	0	0	0	0	0	0	0	0	3	5	1	2	7	3	5	3	5	6	6	6
sp|P36969-2|GPX4_HUMAN	P36969-2	GPX4_HUMAN	GPX4	170	Homo sapiens		Isoform Cytoplasmic of Phospholipid hydroperoxide glutathione peroxidase	1	0.999	6	40	0	40	5	6	1	1	5	7	2	2	2	3	2	4	0	0	0	0	0	0	0	0	0	0	0	0	5	6	1	1	5	7	2	2	2	3	2	4
sp|P37059|DHB2_HUMAN	P37059	DHB2_HUMAN	HSD17B2	387	Homo sapiens	1:Experimental evidence at protein level	17-beta-hydroxysteroid dehydrogenase type 2	1	0.999	6	48	48	48	9	8	7	8	9	4	0	0	0	2	1	0	9	8	7	8	9	4	0	0	0	2	1	0	9	8	7	8	9	4	0	0	0	2	1	0
sp|P37108|SRP14_HUMAN	P37108	SRP14_HUMAN	SRP14	136	Homo sapiens	1:Experimental evidence at protein level	Signal recognition particle 14 kDa protein	1	0.999	2	32	32	32	2	3	3	2	4	3	3	1	2	2	4	3	2	3	3	2	4	3	3	1	2	2	4	3	2	3	3	2	4	3	3	1	2	2	4	3
sp|P37198|NUP62_HUMAN	P37198	NUP62_HUMAN	NUP62	522	Homo sapiens	1:Experimental evidence at protein level	Nuclear pore glycoprotein p62	1	0.999	4	27	27	27	3	3	5	3	3	2	0	1	2	2	2	1	3	3	5	3	3	2	0	1	2	2	2	1	3	3	5	3	3	2	0	1	2	2	2	1
sp|P37235|HPCL1_HUMAN	P37235	HPCL1_HUMAN	HPCAL1	193	Homo sapiens	1:Experimental evidence at protein level	Hippocalcin-like protein 1	1	0.999	4	55	55	55	4	7	3	1	7	3	2	4	6	3	9	6	4	7	3	1	7	3	2	4	6	3	9	6	4	7	3	1	7	3	2	4	6	3	9	6
sp|P37268|FDFT_HUMAN	P37268	FDFT_HUMAN	FDFT1	417	Homo sapiens	1:Experimental evidence at protein level	Squalene synthase	1	0.999	9	91	0	91	8	8	6	2	5	3	6	8	9	13	12	11	0	0	0	0	0	0	0	0	0	0	0	0	8	8	6	2	5	3	6	8	9	13	12	11
sp|P37802-2|TAGL2_HUMAN	P37802-2	TAGL2_HUMAN	TAGLN2	220	Homo sapiens		Isoform 2 of Transgelin-2	1	0.999	11	266	0	266	26	31	15	17	22	22	24	21	22	20	23	23	0	0	0	0	0	0	0	0	0	0	0	0	26	31	15	17	22	22	24	21	22	20	23	23
sp|P37837-2|TALDO_HUMAN	P37837-2	TALDO_HUMAN	TALDO1	327	Homo sapiens		Isoform 2 of Transaldolase	1	0.999	11	107	0	107	12	12	10	7	15	5	7	8	7	6	8	10	0	0	0	0	0	0	0	0	0	0	0	0	12	12	10	7	15	5	7	8	7	6	8	10
sp|P38117-2|ETFB_HUMAN	P38117-2	ETFB_HUMAN	ETFB	346	Homo sapiens		Isoform 2 of Electron transfer flavoprotein subunit beta	1	0.999	4	75	0	75	6	10	4	3	10	5	6	6	5	8	6	6	0	0	0	0	0	0	0	0	0	0	0	0	6	10	4	3	10	5	6	6	5	8	6	6
sp|P38159-2|RBMX_HUMAN	P38159-2	RBMX_HUMAN	RBMX	378	Homo sapiens		Isoform 2 of RNA-binding motif protein, X chromosome	1	0.999	12	119	0	119	9	8	10	9	13	8	7	10	12	10	13	10	0	0	0	0	0	0	0	0	0	0	0	0	9	8	10	9	13	8	7	10	12	10	13	10
sp|P38571-2|LICH_HUMAN	P38571-2	LICH_HUMAN	LIPA	343	Homo sapiens		Isoform 2 of Lysosomal acid lipase/cholesteryl ester hydrolase	1	0.999	2	7	0	7	0	0	1	4	1	0	0	1	0	0	0	0	0	0	0	0	0	0	0	0	0	0	0	0	0	0	1	4	1	0	0	1	0	0	0	0
sp|P38606|VATA_HUMAN	P38606	VATA_HUMAN	ATP6V1A	617	Homo sapiens	1:Experimental evidence at protein level	V-type proton ATPase catalytic subunit A	1	0.999	13	66	1	66	5	2	3	1	12	6	6	5	6	4	9	7	0	0	0	0	0	0	0	1	0	0	0	0	5	2	3	1	12	6	6	5	6	4	9	7
sp|P38646|GRP75_HUMAN	P38646	GRP75_HUMAN	HSPA9	679	Homo sapiens	1:Experimental evidence at protein level	Stress-70 protein, mitochondrial	1	0.999	29	674	674	674	77	73	46	45	75	64	49	37	48	43	54	63	77	73	46	45	75	64	49	37	48	43	54	63	77	73	46	45	75	64	49	37	48	43	54	63
sp|P38919|IF4A3_HUMAN	P38919	IF4A3_HUMAN	EIF4A3	411	Homo sapiens	1:Experimental evidence at protein level	Eukaryotic initiation factor 4A-III	1	0.999	10	67	67	141	5	4	4	4	5	5	5	8	7	9	5	6	5	4	4	4	5	5	5	8	7	9	5	6	9	11	11	11	10	10	12	12	13	13	14	15
sp|P39019|RS19_HUMAN	P39019	RS19_HUMAN	RPS19	145	Homo sapiens	1:Experimental evidence at protein level	40S ribosomal protein S19	1	0.999	6	63	63	63	4	5	5	4	6	5	3	5	6	5	6	9	4	5	5	4	6	5	3	5	6	5	6	9	4	5	5	4	6	5	3	5	6	5	6	9
sp|P39023|RL3_HUMAN	P39023	RL3_HUMAN	RPL3	403	Homo sapiens	1:Experimental evidence at protein level	60S ribosomal protein L3	1	0.999	14	277	277	277	22	25	10	9	40	24	14	24	24	25	30	30	22	25	10	9	40	24	14	24	24	25	30	30	22	25	10	9	40	24	14	24	24	25	30	30
sp|P39060-1|COIA1_HUMAN	P39060-1	COIA1_HUMAN	COL18A1	1519	Homo sapiens		Isoform 2 of Collagen alpha-1(XVIII) chain	1	0.999	6	29	0	29	0	0	0	0	0	0	7	2	3	9	3	5	0	0	0	0	0	0	0	0	0	0	0	0	0	0	0	0	0	0	7	2	3	9	3	5
sp|P39656-2|OST48_HUMAN	P39656-2	OST48_HUMAN	DDOST	419	Homo sapiens		Isoform 2 of Dolichyl-diphosphooligosaccharide--protein glycosyltransferase 48 kDa subunit	1	0.999	4	77	0	77	6	7	3	3	11	9	3	6	6	6	10	7	0	0	0	0	0	0	0	0	0	0	0	0	6	7	3	3	11	9	3	6	6	6	10	7
sp|P39687|AN32A_HUMAN	P39687	AN32A_HUMAN	ANP32A	249	Homo sapiens	1:Experimental evidence at protein level	Acidic leucine-rich nuclear phosphoprotein 32 family member A	1	0.999	8	69	44	69	7	8	4	8	14	7	3	4	4	3	4	3	4	5	3	3	6	5	3	4	3	2	4	2	7	8	4	8	14	7	3	4	4	3	4	3
sp|P39748-2|FEN1_HUMAN	P39748-2	FEN1_HUMAN	FEN1	316	Homo sapiens		Isoform FENMIT of Flap endonuclease 1	1	0.999	7	59	0	59	3	3	1	1	9	1	3	3	6	8	8	13	0	0	0	0	0	0	0	0	0	0	0	0	3	3	1	1	9	1	3	3	6	8	8	13
sp|P39880-2|CUX1_HUMAN	P39880-2	CUX1_HUMAN	CUX1	1483	Homo sapiens		Isoform 2 of Homeobox protein cut-like 1	0.9982	0.999	1	5	0	5	0	0	2	0	0	0	0	1	0	1	0	1	0	0	0	0	0	0	0	0	0	0	0	0	0	0	2	0	0	0	0	1	0	1	0	1
sp|P40121|CAPG_HUMAN	P40121	CAPG_HUMAN	CAPG	348	Homo sapiens	1:Experimental evidence at protein level	Macrophage-capping protein	1	0.999	7	75	5	75	11	7	1	1	9	6	5	5	8	6	9	7	1	0	0	0	3	1	0	0	0	0	0	0	11	7	1	1	9	6	5	5	8	6	9	7
sp|P40123-2|CAP2_HUMAN	P40123-2	CAP2_HUMAN	CAP2	413	Homo sapiens		Isoform 2 of Adenylyl cyclase-associated protein 2	0.9469	0.999	1	1	0	1	0	0	0	0	0	0	0	0	0	0	0	1	0	0	0	0	0	0	0	0	0	0	0	0	0	0	0	0	0	0	0	0	0	0	0	1
sp|P40222|TXLNA_HUMAN	P40222	TXLNA_HUMAN	TXLNA	546	Homo sapiens	1:Experimental evidence at protein level	Alpha-taxilin	1	0.999	4	18	18	18	1	0	2	2	3	0	1	1	1	1	3	3	1	0	2	2	3	0	1	1	1	1	3	3	1	0	2	2	3	0	1	1	1	1	3	3
sp|P40227|TCPZ_HUMAN	P40227	TCPZ_HUMAN	CCT6A	531	Homo sapiens	1:Experimental evidence at protein level	T-complex protein 1 subunit zeta	1	0.999	14	321	139	321	25	32	14	14	27	32	23	29	31	36	30	28	10	17	4	3	11	16	9	18	14	18	7	12	25	32	14	14	27	32	23	29	31	36	30	28
sp|P40306|PSB10_HUMAN	P40306	PSB10_HUMAN	PSMB10	273	Homo sapiens	1:Experimental evidence at protein level	Proteasome subunit beta type-10	0.92	0.9984	1	1	1	1	0	0	0	0	0	1	0	0	0	0	0	0	0	0	0	0	0	1	0	0	0	0	0	0	0	0	0	0	0	1	0	0	0	0	0	0
sp|P40337-2|VHL_HUMAN	P40337-2	VHL_HUMAN	VHL	172	Homo sapiens		Isoform 2 of von Hippel-Lindau disease tumor suppressor	0.9441	0.9989	1	2	0	2	0	0	0	0	0	0	0	0	0	0	0	2	0	0	0	0	0	0	0	0	0	0	0	0	0	0	0	0	0	0	0	0	0	0	0	2
sp|P40429|RL13A_HUMAN	P40429	RL13A_HUMAN	RPL13A	203	Homo sapiens	1:Experimental evidence at protein level	60S ribosomal protein L13a	0.9469	0.999	1	2	0	2	1	1	0	0	0	0	0	0	0	0	0	0	0	0	0	0	0	0	0	0	0	0	0	0	1	1	0	0	0	0	0	0	0	0	0	0
sp|P40616-2|ARL1_HUMAN	P40616-2	ARL1_HUMAN	ARL1	164	Homo sapiens		Isoform 2 of ADP-ribosylation factor-like protein 1	1	0.999	4	59	0	59	6	8	12	8	3	3	3	2	4	3	3	4	0	0	0	0	0	0	0	0	0	0	0	0	6	8	12	8	3	3	3	2	4	3	3	4
sp|P40763-3|STAT3_HUMAN	P40763-3	STAT3_HUMAN	STAT3	722	Homo sapiens		Isoform 3 of Signal transducer and activator of transcription 3	1	0.999	6	49	0	49	5	3	5	6	5	7	1	5	4	4	2	2	0	0	0	0	0	0	0	0	0	0	0	0	5	3	5	6	5	7	1	5	4	4	2	2
sp|P40855|PEX19_HUMAN	P40855	PEX19_HUMAN	PEX19	299	Homo sapiens	1:Experimental evidence at protein level	Peroxisomal biogenesis factor 19	1	0.999	5	25	25	25	7	1	6	4	4	0	0	0	0	1	1	1	7	1	6	4	4	0	0	0	0	1	1	1	7	1	6	4	4	0	0	0	0	1	1	1
sp|P40925-3|MDHC_HUMAN	P40925-3	MDHC_HUMAN	MDH1	352	Homo sapiens		Isoform 3 of Malate dehydrogenase, cytoplasmic	1	0.999	7	215	0	215	12	15	26	18	17	13	21	16	16	22	20	19	0	0	0	0	0	0	0	0	0	0	0	0	12	15	26	18	17	13	21	16	16	22	20	19
sp|P40926|MDHM_HUMAN	P40926	MDHM_HUMAN	MDH2	338	Homo sapiens	1:Experimental evidence at protein level	Malate dehydrogenase, mitochondrial	1	0.999	12	576	49	576	60	61	43	37	64	53	39	39	48	40	45	47	5	7	2	1	6	5	4	4	4	4	2	5	60	61	43	37	64	53	39	39	48	40	45	47
sp|P40937-2|RFC5_HUMAN	P40937-2	RFC5_HUMAN	RFC5	319	Homo sapiens		Isoform 2 of Replication factor C subunit 5	0.9469	0.999	1	11	0	11	1	1	0	0	1	1	2	1	1	1	1	1	0	0	0	0	0	0	0	0	0	0	0	0	1	1	0	0	1	1	2	1	1	1	1	1
sp|P40938-2|RFC3_HUMAN	P40938-2	RFC3_HUMAN	RFC3	305	Homo sapiens		Isoform 2 of Replication factor C subunit 3	0.9445	0.999	1	1	0	1	0	0	0	0	0	0	0	0	0	1	0	0	0	0	0	0	0	0	0	0	0	0	0	0	0	0	0	0	0	0	0	0	0	1	0	0
sp|P40939|ECHA_HUMAN	P40939	ECHA_HUMAN	HADHA	763	Homo sapiens	1:Experimental evidence at protein level	Trifunctional enzyme subunit alpha, mitochondrial	1	0.999	18	191	185	191	21	16	4	2	32	21	15	12	13	15	21	19	19	16	4	2	32	21	15	12	12	13	20	19	21	16	4	2	32	21	15	12	13	15	21	19
sp|P41091|IF2G_HUMAN	P41091	IF2G_HUMAN	EIF2S3	472	Homo sapiens	1:Experimental evidence at protein level	Eukaryotic translation initiation factor 2 subunit 3	1	0.999	11	166	43	166	16	17	13	12	16	19	5	12	10	14	15	17	4	6	4	3	4	4	1	3	2	4	4	4	16	17	13	12	16	19	5	12	10	14	15	17
sp|P41208|CETN2_HUMAN	P41208	CETN2_HUMAN	CETN2	172	Homo sapiens	1:Experimental evidence at protein level	Centrin-2	1	0.999	4	30	30	30	3	3	1	2	2	2	3	2	2	5	2	3	3	3	1	2	2	2	3	2	2	5	2	3	3	3	1	2	2	2	3	2	2	5	2	3
sp|P41223|BUD31_HUMAN	P41223	BUD31_HUMAN	BUD31	144	Homo sapiens	1:Experimental evidence at protein level	Protein BUD31 homolog	1	0.999	2	10	8	10	0	0	2	2	0	0	1	1	1	1	1	1	0	0	0	2	0	0	1	1	1	1	1	1	0	0	2	2	0	0	1	1	1	1	1	1
sp|P41227-2|NAA10_HUMAN	P41227-2	NAA10_HUMAN	NAA10	220	Homo sapiens		Isoform 2 of N-alpha-acetyltransferase 10	1	0.999	4	51	0	51	3	4	6	3	5	2	4	6	3	7	5	3	0	0	0	0	0	0	0	0	0	0	0	0	3	4	6	3	5	2	4	6	3	7	5	3
sp|P41235-2|HNF4A_HUMAN	P41235-2	HNF4A_HUMAN	HNF4A	464	Homo sapiens		Isoform HNF4-Alpha-2 of Hepatocyte nuclear factor 4-alpha	0.9469	0.999	1	8	0	8	0	1	0	0	1	2	2	1	1	0	0	0	0	0	0	0	0	0	0	0	0	0	0	0	0	1	0	0	1	2	2	1	1	0	0	0
sp|P41236|IPP2_HUMAN	P41236	IPP2_HUMAN	PPP1R2	205	Homo sapiens	1:Experimental evidence at protein level	Protein phosphatase inhibitor 2	1	0.999	3	22	12	22	3	2	1	1	1	0	3	2	3	2	2	2	2	1	0	0	1	0	2	1	2	1	1	1	3	2	1	1	1	0	3	2	3	2	2	2
sp|P41240|CSK_HUMAN	P41240	CSK_HUMAN	CSK	450	Homo sapiens	1:Experimental evidence at protein level	Tyrosine-protein kinase CSK	0.9978	0.999	1	2	2	2	0	0	0	0	0	0	1	0	1	0	0	0	0	0	0	0	0	0	1	0	1	0	0	0	0	0	0	0	0	0	1	0	1	0	0	0
sp|P41250-2|GARS_HUMAN	P41250-2	GARS_HUMAN	GARS1	685	Homo sapiens		Isoform 2 of Glycine--tRNA ligase	1	0.999	14	82	0	82	10	10	5	6	13	4	5	1	7	5	8	8	0	0	0	0	0	0	0	0	0	0	0	0	10	10	5	6	13	4	5	1	7	5	8	8
sp|P41252|SYIC_HUMAN	P41252	SYIC_HUMAN	IARS1	1262	Homo sapiens	1:Experimental evidence at protein level	Isoleucine--tRNA ligase, cytoplasmic	1	0.999	20	199	199	199	24	19	20	11	19	16	16	10	19	14	13	18	24	19	20	11	19	16	16	10	19	14	13	18	24	19	20	11	19	16	16	10	19	14	13	18
sp|P41567|EIF1_HUMAN	P41567	EIF1_HUMAN	EIF1	113	Homo sapiens	1:Experimental evidence at protein level	Eukaryotic translation initiation factor 1	1	0.999	8	85	36	85	11	8	4	4	9	8	5	7	10	6	7	6	4	3	1	3	6	2	3	3	4	2	3	2	11	8	4	4	9	8	5	7	10	6	7	6
sp|P41743|KPCI_HUMAN	P41743	KPCI_HUMAN	PRKCI	596	Homo sapiens	1:Experimental evidence at protein level	Protein kinase C iota type	1	0.999	3	31	31	31	2	3	3	0	5	6	1	1	2	1	3	4	2	3	3	0	5	6	1	1	2	1	3	4	2	3	3	0	5	6	1	1	2	1	3	4
sp|P42025|ACTY_HUMAN	P42025	ACTY_HUMAN	ACTR1B	376	Homo sapiens	1:Experimental evidence at protein level	Beta-centractin	1	0.999	6	20	20	51	0	0	1	1	1	1	5	1	2	3	3	2	0	0	1	1	1	1	5	1	2	3	3	2	2	3	1	1	9	5	6	4	4	6	5	5
sp|P42126-2|ECI1_HUMAN	P42126-2	ECI1_HUMAN	ECI1	285	Homo sapiens		Isoform 2 of Enoyl-CoA delta isomerase 1, mitochondrial	0.9469	0.999	1	12	0	12	1	1	1	1	1	2	0	1	1	1	1	1	0	0	0	0	0	0	0	0	0	0	0	0	1	1	1	1	1	2	0	1	1	1	1	1
sp|P42166|LAP2A_HUMAN	P42166	LAP2A_HUMAN	TMPO	694	Homo sapiens	1:Experimental evidence at protein level	Lamina-associated polypeptide 2, isoform alpha	1	0.999	16	227	106	227	17	20	14	11	21	22	15	19	21	21	24	22	6	6	6	4	8	10	10	11	11	12	13	9	17	20	14	11	21	22	15	19	21	21	24	22
sp|P42167-2|LAP2B_HUMAN	P42167-2	LAP2B_HUMAN	TMPO	345	Homo sapiens		Isoform Gamma of Lamina-associated polypeptide 2, isoforms beta/gamma	0.9998	0.9983	12	6	6	161	0	0	5	1	0	0	0	0	0	0	0	0	0	0	5	1	0	0	0	0	0	0	0	0	15	19	14	9	17	14	6	11	15	13	13	15
sp|P42167|LAP2B_HUMAN	P42167	LAP2B_HUMAN	TMPO	454	Homo sapiens	1:Experimental evidence at protein level	Lamina-associated polypeptide 2, isoforms beta/gamma	1	0.999	17	96	62	217	7	10	7	6	8	7	6	10	10	9	9	7	3	5	6	5	4	5	5	7	5	5	7	5	18	24	15	13	21	19	11	18	20	18	20	20
sp|P42224|STAT1_HUMAN	P42224	STAT1_HUMAN	STAT1	750	Homo sapiens	1:Experimental evidence at protein level	Signal transducer and activator of transcription 1-alpha/beta	1	0.999	9	66	15	66	4	6	1	1	8	2	6	4	8	9	9	8	1	0	1	1	1	1	2	1	2	1	2	2	4	6	1	1	8	2	6	4	8	9	9	8
sp|P42226-2|STAT6_HUMAN	P42226-2	STAT6_HUMAN	STAT6	673	Homo sapiens		Isoform 2 of Signal transducer and activator of transcription 6	1	0.999	5	24	0	24	2	0	2	1	1	3	2	4	4	2	2	1	0	0	0	0	0	0	0	0	0	0	0	0	2	0	2	1	1	3	2	4	4	2	2	1
sp|P42285|MTREX_HUMAN	P42285	MTREX_HUMAN	MTREX	1042	Homo sapiens	1:Experimental evidence at protein level	Exosome RNA helicase MTR4	1	0.999	9	25	25	25	1	3	1	3	0	1	2	6	1	1	1	5	1	3	1	3	0	1	2	6	1	1	1	5	1	3	1	3	0	1	2	6	1	1	1	5
sp|P42330-2|AK1C3_HUMAN	P42330-2	AK1C3_HUMAN	AKR1C3	204	Homo sapiens		Isoform 2 of Aldo-keto reductase family 1 member C3	0.9999	0.9988	10	2	2	394	0	0	1	0	0	1	0	0	0	0	0	0	0	0	1	0	0	1	0	0	0	0	0	0	37	39	30	27	33	35	29	27	34	36	31	36
sp|P42330|AK1C3_HUMAN	P42330	AK1C3_HUMAN	AKR1C3	323	Homo sapiens	1:Experimental evidence at protein level	Aldo-keto reductase family 1 member C3	1	0.999	15	557	92	557	51	59	48	44	43	49	43	38	42	45	46	49	10	13	10	9	7	6	6	4	4	6	10	7	51	59	48	44	43	49	43	38	42	45	46	49
sp|P42345|MTOR_HUMAN	P42345	MTOR_HUMAN	MTOR	2549	Homo sapiens	1:Experimental evidence at protein level	Serine/threonine-protein kinase mTOR	1	0.999	7	30	30	30	2	3	5	7	1	2	1	1	2	2	2	2	2	3	5	7	1	2	1	1	2	2	2	2	2	3	5	7	1	2	1	1	2	2	2	2
sp|P42356|PI4KA_HUMAN	P42356	PI4KA_HUMAN	PI4KA	2102	Homo sapiens	1:Experimental evidence at protein level	Phosphatidylinositol 4-kinase alpha	0.8428	0.9967	1	1	1	1	0	0	1	0	0	0	0	0	0	0	0	0	0	0	1	0	0	0	0	0	0	0	0	0	0	0	1	0	0	0	0	0	0	0	0	0
sp|P42566|EPS15_HUMAN	P42566	EPS15_HUMAN	EPS15	896	Homo sapiens	1:Experimental evidence at protein level	Epidermal growth factor receptor substrate 15	1	0.999	4	13	2	13	1	4	1	0	1	0	0	1	1	0	2	2	0	1	0	0	0	0	0	1	0	0	0	0	1	4	1	0	1	0	0	1	1	0	2	2
sp|P42574|CASP3_HUMAN	P42574	CASP3_HUMAN	CASP3	277	Homo sapiens	1:Experimental evidence at protein level	Caspase-3	0.9469	0.999	1	7	7	7	0	0	1	0	0	0	0	2	2	2	0	0	0	0	1	0	0	0	0	2	2	2	0	0	0	0	1	0	0	0	0	2	2	2	0	0
sp|P42677|RS27_HUMAN	P42677	RS27_HUMAN	RPS27	84	Homo sapiens	1:Experimental evidence at protein level	40S ribosomal protein S27	1	0.999	4	37	35	37	3	4	2	2	2	2	1	4	6	2	4	5	2	3	2	2	2	2	1	4	6	2	4	5	3	4	2	2	2	2	1	4	6	2	4	5
sp|P42685-2|FRK_HUMAN	P42685-2	FRK_HUMAN	FRK	363	Homo sapiens		Isoform 2 of Tyrosine-protein kinase FRK	0.9999	0.9989	2	4	0	4	1	0	0	1	1	0	0	0	0	1	0	0	0	0	0	0	0	0	0	0	0	0	0	0	1	0	0	1	1	0	0	0	0	1	0	0
sp|P42704|LPPRC_HUMAN	P42704	LPPRC_HUMAN	LRPPRC	1394	Homo sapiens	1:Experimental evidence at protein level	Leucine-rich PPR motif-containing protein, mitochondrial	1	0.999	36	465	465	465	37	40	22	19	54	40	38	35	45	39	44	52	37	40	22	19	54	40	38	35	45	39	44	52	37	40	22	19	54	40	38	35	45	39	44	52
sp|P42765|THIM_HUMAN	P42765	THIM_HUMAN	ACAA2	397	Homo sapiens	1:Experimental evidence at protein level	3-ketoacyl-CoA thiolase, mitochondrial	1	0.999	10	115	115	115	13	16	6	4	16	15	7	7	6	8	8	9	13	16	6	4	16	15	7	7	6	8	8	9	13	16	6	4	16	15	7	7	6	8	8	9
sp|P42766|RL35_HUMAN	P42766	RL35_HUMAN	RPL35	123	Homo sapiens	1:Experimental evidence at protein level	60S ribosomal protein L35	1	0.999	5	31	31	31	3	5	3	2	4	2	0	1	1	1	5	4	3	5	3	2	4	2	0	1	1	1	5	4	3	5	3	2	4	2	0	1	1	1	5	4
sp|P42785-2|PCP_HUMAN	P42785-2	PCP_HUMAN	PRCP	517	Homo sapiens		Isoform 2 of Lysosomal Pro-X carboxypeptidase	0.9469	0.999	1	6	0	6	0	0	0	0	0	0	1	1	1	1	1	1	0	0	0	0	0	0	0	0	0	0	0	0	0	0	0	0	0	0	1	1	1	1	1	1
sp|P42858|HD_HUMAN	P42858	HD_HUMAN	HTT	3142	Homo sapiens	1:Experimental evidence at protein level	Huntingtin	1	0.999	3	4	4	4	0	1	2	1	0	0	0	0	0	0	0	0	0	1	2	1	0	0	0	0	0	0	0	0	0	1	2	1	0	0	0	0	0	0	0	0
sp|P42892-2|ECE1_HUMAN	P42892-2	ECE1_HUMAN	ECE1	758	Homo sapiens		Isoform A of Endothelin-converting enzyme 1	1	0.9986	2	3	0	3	0	0	0	0	0	0	0	0	0	1	1	1	0	0	0	0	0	0	0	0	0	0	0	0	0	0	0	0	0	0	0	0	0	1	1	1
sp|P43005|EAA3_HUMAN	P43005	EAA3_HUMAN	SLC1A1	524	Homo sapiens	1:Experimental evidence at protein level	Excitatory amino acid transporter 3	0.9469	0.999	1	5	5	5	1	0	0	0	1	1	0	0	0	0	1	1	1	0	0	0	1	1	0	0	0	0	1	1	1	0	0	0	1	1	0	0	0	0	1	1
sp|P43007|SATT_HUMAN	P43007	SATT_HUMAN	SLC1A4	532	Homo sapiens	1:Experimental evidence at protein level	Neutral amino acid transporter A	1	0.9988	2	3	1	3	0	0	0	0	0	0	0	0	0	0	0	3	0	0	0	0	0	0	0	0	0	0	0	1	0	0	0	0	0	0	0	0	0	0	0	3
sp|P43034|LIS1_HUMAN	P43034	LIS1_HUMAN	PAFAH1B1	410	Homo sapiens	1:Experimental evidence at protein level	Platelet-activating factor acetylhydrolase IB subunit beta	1	0.999	9	89	73	89	9	9	8	8	8	9	2	8	6	7	9	6	8	8	7	5	7	7	1	7	4	6	8	5	9	9	8	8	8	9	2	8	6	7	9	6
sp|P43155-2|CACP_HUMAN	P43155-2	CACP_HUMAN	CRAT	605	Homo sapiens		Isoform 2 of Carnitine O-acetyltransferase	1	0.999	5	50	0	50	5	7	4	3	6	5	1	4	4	3	3	5	0	0	0	0	0	0	0	0	0	0	0	0	5	7	4	3	6	5	1	4	4	3	3	5
sp|P43243|MATR3_HUMAN	P43243	MATR3_HUMAN	MATR3	847	Homo sapiens	1:Experimental evidence at protein level	Matrin-3	1	0.999	23	330	189	330	23	28	18	17	21	26	33	29	39	33	34	29	13	13	14	11	15	16	18	15	20	20	19	15	23	28	18	17	21	26	33	29	39	33	34	29
sp|P43246|MSH2_HUMAN	P43246	MSH2_HUMAN	MSH2	934	Homo sapiens	1:Experimental evidence at protein level	DNA mismatch repair protein Msh2	1	0.999	2	6	4	6	0	0	2	1	0	0	0	0	2	1	0	0	0	0	2	1	0	0	0	0	1	0	0	0	0	0	2	1	0	0	0	0	2	1	0	0
sp|P43251-2|BTD_HUMAN	P43251-2	BTD_HUMAN	BTD	545	Homo sapiens		Isoform 2 of Biotinidase	1	0.999	2	5	0	5	0	0	1	1	0	2	0	0	0	1	0	0	0	0	0	0	0	0	0	0	0	0	0	0	0	0	1	1	0	2	0	0	0	1	0	0
sp|P43304-2|GPDM_HUMAN	P43304-2	GPDM_HUMAN	GPD2	601	Homo sapiens		Isoform 2 of Glycerol-3-phosphate dehydrogenase, mitochondrial	1	0.999	16	140	0	140	7	12	9	7	15	15	14	11	12	12	13	13	0	0	0	0	0	0	0	0	0	0	0	0	7	12	9	7	15	15	14	11	12	12	13	13
sp|P43307-2|SSRA_HUMAN	P43307-2	SSRA_HUMAN	SSR1	259	Homo sapiens		Isoform 2 of Translocon-associated protein subunit alpha	0.9469	0.999	1	7	0	7	2	1	0	0	0	1	0	0	0	1	0	2	0	0	0	0	0	0	0	0	0	0	0	0	2	1	0	0	0	1	0	0	0	1	0	2
sp|P43405-2|KSYK_HUMAN	P43405-2	KSYK_HUMAN	SYK	612	Homo sapiens		Isoform Short of Tyrosine-protein kinase SYK	1	0.999	4	20	0	20	0	1	1	1	2	2	0	2	3	4	3	1	0	0	0	0	0	0	0	0	0	0	0	0	0	1	1	1	2	2	0	2	3	4	3	1
sp|P43487-2|RANG_HUMAN	P43487-2	RANG_HUMAN	RANBP1	200	Homo sapiens		Isoform 2 of Ran-specific GTPase-activating protein	1	0.999	8	188	0	188	22	20	14	7	17	12	16	16	17	15	16	16	0	0	0	0	0	0	0	0	0	0	0	0	22	20	14	7	17	12	16	16	17	15	16	16
sp|P43490|NAMPT_HUMAN	P43490	NAMPT_HUMAN	NAMPT	491	Homo sapiens	1:Experimental evidence at protein level	Nicotinamide phosphoribosyltransferase	1	0.999	13	176	176	176	15	13	11	7	18	14	11	14	24	15	14	20	15	13	11	7	18	14	11	14	24	15	14	20	15	13	11	7	18	14	11	14	24	15	14	20
sp|P43686|PRS6B_HUMAN	P43686	PRS6B_HUMAN	PSMC4	418	Homo sapiens	1:Experimental evidence at protein level	26S proteasome regulatory subunit 6B	1	0.999	18	228	41	228	20	15	18	17	27	18	12	17	17	20	26	21	3	3	2	2	10	4	2	2	1	2	7	3	20	15	18	17	27	18	12	17	17	20	26	21
sp|P43897|EFTS_HUMAN	P43897	EFTS_HUMAN	TSFM	325	Homo sapiens	1:Experimental evidence at protein level	Elongation factor Ts, mitochondrial	1	0.999	6	77	0	77	6	7	4	5	13	8	4	6	7	4	5	8	0	0	0	0	0	0	0	0	0	0	0	0	6	7	4	5	13	8	4	6	7	4	5	8
sp|P45880|VDAC2_HUMAN	P45880	VDAC2_HUMAN	VDAC2	294	Homo sapiens	1:Experimental evidence at protein level	Voltage-dependent anion-selective channel protein 2	1	0.999	9	329	31	329	45	37	26	21	59	55	13	15	12	12	14	20	6	7	4	2	4	1	1	1	1	1	2	1	45	37	26	21	59	55	13	15	12	12	14	20
sp|P45954-2|ACDSB_HUMAN	P45954-2	ACDSB_HUMAN	ACADSB	330	Homo sapiens		Isoform 2 of Short/branched chain specific acyl-CoA dehydrogenase, mitochondrial	1	0.999	2	19	0	19	3	2	2	1	1	2	1	2	1	1	1	2	0	0	0	0	0	0	0	0	0	0	0	0	3	2	2	1	1	2	1	2	1	1	1	2
sp|P45973|CBX5_HUMAN	P45973	CBX5_HUMAN	CBX5	191	Homo sapiens	1:Experimental evidence at protein level	Chromobox protein homolog 5	1	0.999	9	94	94	94	6	6	7	5	6	5	10	9	12	10	9	9	6	6	7	5	6	5	10	9	12	10	9	9	6	6	7	5	6	5	10	9	12	10	9	9
sp|P45974-2|UBP5_HUMAN	P45974-2	UBP5_HUMAN	USP5	835	Homo sapiens		Isoform Short of Ubiquitin carboxyl-terminal hydrolase 5	1	0.999	14	131	0	131	15	12	10	9	15	11	8	9	10	11	10	11	0	0	0	0	0	0	0	0	0	0	0	0	15	12	10	9	15	11	8	9	10	11	10	11
sp|P45985-2|MP2K4_HUMAN	P45985-2	MP2K4_HUMAN	MAP2K4	410	Homo sapiens		Isoform 2 of Dual specificity mitogen-activated protein kinase kinase 4	0.9998	0.999	2	6	0	6	1	0	0	0	1	3	1	0	0	0	0	0	0	0	0	0	0	0	0	0	0	0	0	0	1	0	0	0	1	3	1	0	0	0	0	0
sp|P46020-2|KPB1_HUMAN	P46020-2	KPB1_HUMAN	PHKA1	1210	Homo sapiens		Isoform 2 of Phosphorylase b kinase regulatory subunit alpha, skeletal muscle isoform	1	0.9975	2	12	0	12	0	1	2	2	0	1	0	1	1	0	1	3	0	0	0	0	0	0	0	0	0	0	0	0	0	1	2	2	0	1	0	1	1	0	1	3
sp|P46060|RAGP1_HUMAN	P46060	RAGP1_HUMAN	RANGAP1	587	Homo sapiens	1:Experimental evidence at protein level	Ran GTPase-activating protein 1	1	0.999	7	39	39	39	1	2	3	3	4	2	2	4	3	4	5	6	1	2	3	3	4	2	2	4	3	4	5	6	1	2	3	3	4	2	2	4	3	4	5	6
sp|P46063|RECQ1_HUMAN	P46063	RECQ1_HUMAN	RECQL	649	Homo sapiens	1:Experimental evidence at protein level	ATP-dependent DNA helicase Q1	1	0.999	7	54	54	54	5	5	2	2	10	5	3	5	3	6	2	6	5	5	2	2	10	5	3	5	3	6	2	6	5	5	2	2	10	5	3	5	3	6	2	6
sp|P46087-2|NOP2_HUMAN	P46087-2	NOP2_HUMAN	NOP2	808	Homo sapiens		Isoform 2 of Probable 28S rRNA (cytosine(4447)-C(5))-methyltransferase	1	0.999	3	14	0	14	2	1	0	0	2	4	0	1	1	0	2	1	0	0	0	0	0	0	0	0	0	0	0	0	2	1	0	0	2	4	0	1	1	0	2	1
sp|P46100-2|ATRX_HUMAN	P46100-2	ATRX_HUMAN	ATRX	2288	Homo sapiens		Isoform 1 of Transcriptional regulator ATRX	0.9999	0.9985	2	2	0	2	0	0	1	1	0	0	0	0	0	0	0	0	0	0	0	0	0	0	0	0	0	0	0	0	0	0	1	1	0	0	0	0	0	0	0	0
sp|P46108-2|CRK_HUMAN	P46108-2	CRK_HUMAN	CRK	204	Homo sapiens		Isoform Crk-I of Adapter molecule crk	1	0.999	6	67	3	67	7	2	7	6	5	7	5	4	7	4	8	5	0	0	1	1	0	0	0	0	0	0	1	0	7	2	7	6	5	7	5	4	7	4	8	5
sp|P46109|CRKL_HUMAN	P46109	CRKL_HUMAN	CRKL	303	Homo sapiens	1:Experimental evidence at protein level	Crk-like protein	1	0.999	6	50	50	50	3	2	3	1	4	6	6	5	5	5	3	7	3	2	3	1	4	6	6	5	5	5	3	7	3	2	3	1	4	6	6	5	5	5	3	7
sp|P46199|IF2M_HUMAN	P46199	IF2M_HUMAN	MTIF2	727	Homo sapiens	1:Experimental evidence at protein level	Translation initiation factor IF-2, mitochondrial	0.9401	0.9989	1	1	1	1	0	0	1	0	0	0	0	0	0	0	0	0	0	0	1	0	0	0	0	0	0	0	0	0	0	0	1	0	0	0	0	0	0	0	0	0
sp|P46379-2|BAG6_HUMAN	P46379-2	BAG6_HUMAN	BAG6	1126	Homo sapiens		Isoform 2 of Large proline-rich protein BAG6	1	0.999	6	38	0	38	5	3	2	3	4	3	2	2	2	3	3	6	0	0	0	0	0	0	0	0	0	0	0	0	5	3	2	3	4	3	2	2	2	3	3	6
sp|P46459|NSF_HUMAN	P46459	NSF_HUMAN	NSF	744	Homo sapiens	1:Experimental evidence at protein level	Vesicle-fusing ATPase	1	0.999	7	42	10	42	3	3	6	4	6	6	1	2	3	2	3	3	1	1	0	1	1	1	0	1	1	1	1	1	3	3	6	4	6	6	1	2	3	2	3	3
sp|P46527|CDN1B_HUMAN	P46527	CDN1B_HUMAN	CDKN1B	198	Homo sapiens	1:Experimental evidence at protein level	Cyclin-dependent kinase inhibitor 1B	1	0.999	2	5	5	5	1	0	0	0	1	0	0	0	0	1	1	1	1	0	0	0	1	0	0	0	0	1	1	1	1	0	0	0	1	0	0	0	0	1	1	1
sp|P46734-3|MP2K3_HUMAN	P46734-3	MP2K3_HUMAN	MAP2K3	352	Homo sapiens		Isoform 2 of Dual specificity mitogen-activated protein kinase kinase 3	1	0.999	5	15	0	15	2	2	3	4	2	1	0	0	0	0	1	0	0	0	0	0	0	0	0	0	0	0	0	0	2	2	3	4	2	1	0	0	0	0	1	0
sp|P46776|RL27A_HUMAN	P46776	RL27A_HUMAN	RPL27A	148	Homo sapiens	1:Experimental evidence at protein level	60S ribosomal protein L27a	1	0.999	3	7	7	7	0	1	0	1	1	2	0	2	0	0	0	0	0	1	0	1	1	2	0	2	0	0	0	0	0	1	0	1	1	2	0	2	0	0	0	0
sp|P46777|RL5_HUMAN	P46777	RL5_HUMAN	RPL5	297	Homo sapiens	1:Experimental evidence at protein level	60S ribosomal protein L5	1	0.999	9	206	206	206	17	17	9	11	24	21	12	16	18	17	23	21	17	17	9	11	24	21	12	16	18	17	23	21	17	17	9	11	24	21	12	16	18	17	23	21
sp|P46778|RL21_HUMAN	P46778	RL21_HUMAN	RPL21	160	Homo sapiens	1:Experimental evidence at protein level	60S ribosomal protein L21	1	0.999	4	109	109	109	11	8	5	2	11	8	8	5	8	10	16	17	11	8	5	2	11	8	8	5	8	10	16	17	11	8	5	2	11	8	8	5	8	10	16	17
sp|P46779|RL28_HUMAN	P46779	RL28_HUMAN	RPL28	137	Homo sapiens	1:Experimental evidence at protein level	60S ribosomal protein L28	1	0.999	5	46	11	46	5	5	4	1	7	3	3	3	4	4	4	3	1	1	0	0	1	1	2	1	1	1	1	1	5	5	4	1	7	3	3	3	4	4	4	3
sp|P46781|RS9_HUMAN	P46781	RS9_HUMAN	RPS9	194	Homo sapiens	1:Experimental evidence at protein level	40S ribosomal protein S9	1	0.999	8	79	79	79	8	7	7	4	7	5	5	7	6	7	9	7	8	7	7	4	7	5	5	7	6	7	9	7	8	7	7	4	7	5	5	7	6	7	9	7
sp|P46782|RS5_HUMAN	P46782	RS5_HUMAN	RPS5	204	Homo sapiens	1:Experimental evidence at protein level	40S ribosomal protein S5	1	0.999	7	137	137	137	10	13	3	2	12	11	9	16	14	19	13	15	10	13	3	2	12	11	9	16	14	19	13	15	10	13	3	2	12	11	9	16	14	19	13	15
sp|P46783|RS10_HUMAN	P46783	RS10_HUMAN	RPS10	165	Homo sapiens	1:Experimental evidence at protein level	40S ribosomal protein S10	1	0.999	7	112	82	112	9	11	11	13	7	8	9	8	10	9	9	8	7	7	7	8	5	7	7	7	6	7	6	8	9	11	11	13	7	8	9	8	10	9	9	8
sp|P46926|GNPI1_HUMAN	P46926	GNPI1_HUMAN	GNPDA1	289	Homo sapiens	1:Experimental evidence at protein level	Glucosamine-6-phosphate isomerase 1	1	0.999	4	32	8	32	1	4	4	5	1	2	3	3	2	4	1	2	0	2	0	2	0	1	2	0	0	1	0	0	1	4	4	5	1	2	3	3	2	4	1	2
sp|P46934-2|NEDD4_HUMAN	P46934-2	NEDD4_HUMAN	NEDD4	1303	Homo sapiens		Isoform 2 of E3 ubiquitin-protein ligase NEDD4	0.9469	0.999	1	4	0	4	0	0	0	0	0	0	0	1	1	0	1	1	0	0	0	0	0	0	0	0	0	0	0	0	0	0	0	0	0	0	0	1	1	0	1	1
sp|P46937-2|YAP1_HUMAN	P46937-2	YAP1_HUMAN	YAP1	488	Homo sapiens		Isoform 2 of Transcriptional coactivator YAP1	1	0.999	5	19	0	19	1	1	0	0	1	2	2	2	2	3	1	4	0	0	0	0	0	0	0	0	0	0	0	0	1	1	0	0	1	2	2	2	2	3	1	4
sp|P46939-2|UTRN_HUMAN	P46939-2	UTRN_HUMAN	UTRN	3438	Homo sapiens		Isoform 2 of Utrophin	1	0.999	11	47	0	47	2	1	6	4	8	2	2	4	5	5	2	6	0	0	0	0	0	0	0	0	0	0	0	0	2	1	6	4	8	2	2	4	5	5	2	6
sp|P46940|IQGA1_HUMAN	P46940	IQGA1_HUMAN	IQGAP1	1657	Homo sapiens	1:Experimental evidence at protein level	Ras GTPase-activating-like protein IQGAP1	1	0.999	42	409	407	409	40	41	37	32	54	39	22	28	28	33	25	30	40	41	36	31	54	39	22	28	28	33	25	30	40	41	37	32	54	39	22	28	28	33	25	30
sp|P46976-2|GLYG_HUMAN	P46976-2	GLYG_HUMAN	GYG1	333	Homo sapiens		Isoform GN-1 of Glycogenin-1	1	0.999	3	11	0	11	3	0	1	0	0	0	0	3	0	1	1	2	0	0	0	0	0	0	0	0	0	0	0	0	3	0	1	0	0	0	0	3	0	1	1	2
sp|P46977|STT3A_HUMAN	P46977	STT3A_HUMAN	STT3A	705	Homo sapiens	1:Experimental evidence at protein level	Dolichyl-diphosphooligosaccharide--protein glycosyltransferase subunit STT3A	1	0.999	9	72	15	72	6	3	7	9	12	9	1	2	6	6	5	6	2	1	0	1	2	3	0	0	3	1	0	2	6	3	7	9	12	9	1	2	6	6	5	6
sp|P47736-2|RPGP1_HUMAN	P47736-2	RPGP1_HUMAN	RAP1GAP	681	Homo sapiens		Isoform 2 of Rap1 GTPase-activating protein 1	0.9457	0.999	1	8	0	8	1	2	0	0	0	2	0	0	1	2	0	0	0	0	0	0	0	0	0	0	0	0	0	0	1	2	0	0	0	2	0	0	1	2	0	0
sp|P47755|CAZA2_HUMAN	P47755	CAZA2_HUMAN	CAPZA2	286	Homo sapiens	1:Experimental evidence at protein level	F-actin-capping protein subunit alpha-2	1	0.999	10	104	59	132	10	10	5	6	14	15	7	6	6	7	8	10	6	5	3	5	7	6	4	5	4	5	4	5	12	12	9	9	17	18	9	7	8	9	11	11
sp|P47756|CAPZB_HUMAN	P47756	CAPZB_HUMAN	CAPZB	272	Homo sapiens	1:Experimental evidence at protein level	F-actin-capping protein subunit beta	1	0.999	13	159	23	159	20	13	19	11	16	18	10	11	10	12	11	8	2	2	4	1	5	3	0	1	2	1	1	1	20	13	19	11	16	18	10	11	10	12	11	8
sp|P47813|IF1AX_HUMAN	P47813	IF1AX_HUMAN	EIF1AX	144	Homo sapiens	1:Experimental evidence at protein level	Eukaryotic translation initiation factor 1A, X-chromosomal	1	0.999	5	43	12	43	4	2	6	1	3	3	2	5	5	4	4	4	1	1	1	1	1	1	0	0	2	2	1	1	4	2	6	1	3	3	2	5	5	4	4	4
sp|P47895|AL1A3_HUMAN	P47895	AL1A3_HUMAN	ALDH1A3	512	Homo sapiens	1:Experimental evidence at protein level	Aldehyde dehydrogenase family 1 member A3	0.9958	0.9989	2	3	3	9	0	0	0	0	0	0	0	0	1	1	0	1	0	0	0	0	0	0	0	0	1	1	0	1	3	1	0	0	1	1	0	0	1	1	0	1
sp|P47897|SYQ_HUMAN	P47897	SYQ_HUMAN	QARS1	775	Homo sapiens	1:Experimental evidence at protein level	Glutamine--tRNA ligase	1	0.999	18	227	7	227	23	18	19	17	24	17	12	13	20	24	22	18	2	0	0	0	1	1	0	0	0	1	1	1	23	18	19	17	24	17	12	13	20	24	22	18
sp|P47914|RL29_HUMAN	P47914	RL29_HUMAN	RPL29	159	Homo sapiens	1:Experimental evidence at protein level	60S ribosomal protein L29	0.9469	0.999	1	6	6	6	1	1	0	0	4	0	0	0	0	0	0	0	1	1	0	0	4	0	0	0	0	0	0	0	1	1	0	0	4	0	0	0	0	0	0	0
sp|P47974|TISD_HUMAN	P47974	TISD_HUMAN	ZFP36L2	494	Homo sapiens	1:Experimental evidence at protein level	mRNA decay activator protein ZFP36L2	1	0.999	3	4	4	4	1	0	1	1	0	0	0	0	0	1	0	0	1	0	1	1	0	0	0	0	0	1	0	0	1	0	1	1	0	0	0	0	0	1	0	0
sp|P48047|ATPO_HUMAN	P48047	ATPO_HUMAN	ATP5PO	213	Homo sapiens	1:Experimental evidence at protein level	ATP synthase subunit O, mitochondrial	1	0.999	5	112	112	112	9	10	6	6	11	11	12	6	11	8	9	13	9	10	6	6	11	11	12	6	11	8	9	13	9	10	6	6	11	11	12	6	11	8	9	13
sp|P48059-2|LIMS1_HUMAN	P48059-2	LIMS1_HUMAN	LIMS1	337	Homo sapiens		Isoform 2 of LIM and senescent cell antigen-like-containing domain protein 1	1	0.999	7	70	4	70	4	4	2	1	4	4	6	9	8	9	9	10	0	0	0	0	0	0	2	2	0	0	0	0	4	4	2	1	4	4	6	9	8	9	9	10
sp|P48147|PPCE_HUMAN	P48147	PPCE_HUMAN	PREP	710	Homo sapiens	1:Experimental evidence at protein level	Prolyl endopeptidase	1	0.999	16	136	136	136	13	14	12	14	16	17	7	7	8	7	11	10	13	14	12	14	16	17	7	7	8	7	11	10	13	14	12	14	16	17	7	7	8	7	11	10
sp|P48163|MAOX_HUMAN	P48163	MAOX_HUMAN	ME1	572	Homo sapiens	1:Experimental evidence at protein level	NADP-dependent malic enzyme	1	0.999	10	46	7	46	7	7	3	2	8	5	2	3	2	1	2	4	0	0	2	1	0	2	0	0	1	0	0	1	7	7	3	2	8	5	2	3	2	1	2	4
sp|P48426-2|PI42A_HUMAN	P48426-2	PI42A_HUMAN	PIP4K2A	347	Homo sapiens		Isoform 2 of Phosphatidylinositol 5-phosphate 4-kinase type-2 alpha	0.9981	0.999	2	11	0	11	0	1	3	2	1	0	2	1	0	1	0	0	0	0	0	0	0	0	0	0	0	0	0	0	0	1	3	2	1	0	2	1	0	1	0	0
sp|P48444|COPD_HUMAN	P48444	COPD_HUMAN	ARCN1	511	Homo sapiens	1:Experimental evidence at protein level	Coatomer subunit delta	1	0.999	17	168	2	168	18	17	10	10	19	19	12	14	10	12	15	12	0	1	0	0	1	0	0	0	0	0	0	0	18	17	10	10	19	19	12	14	10	12	15	12
sp|P48449-2|LSS_HUMAN	P48449-2	LSS_HUMAN	LSS	652	Homo sapiens		Isoform 2 of Lanosterol synthase	1	0.999	4	10	0	10	1	0	0	0	0	2	1	1	0	3	1	1	0	0	0	0	0	0	0	0	0	0	0	0	1	0	0	0	0	2	1	1	0	3	1	1
sp|P48506|GSH1_HUMAN	P48506	GSH1_HUMAN	GCLC	637	Homo sapiens	1:Experimental evidence at protein level	Glutamate--cysteine ligase catalytic subunit	1	0.999	4	44	44	44	3	1	3	2	4	5	6	4	3	4	5	4	3	1	3	2	4	5	6	4	3	4	5	4	3	1	3	2	4	5	6	4	3	4	5	4
sp|P48507|GSH0_HUMAN	P48507	GSH0_HUMAN	GCLM	274	Homo sapiens	1:Experimental evidence at protein level	Glutamate--cysteine ligase regulatory subunit	1	0.999	2	21	17	21	2	1	1	0	1	3	2	1	4	2	3	1	2	1	1	0	1	3	1	1	3	2	1	1	2	1	1	0	1	3	2	1	4	2	3	1
sp|P48509|CD151_HUMAN	P48509	CD151_HUMAN	CD151	253	Homo sapiens	1:Experimental evidence at protein level	CD151 antigen	0.9469	0.999	1	10	10	10	2	1	0	0	1	1	0	1	1	1	1	1	2	1	0	0	1	1	0	1	1	1	1	1	2	1	0	0	1	1	0	1	1	1	1	1
sp|P48634-2|PRC2A_HUMAN	P48634-2	PRC2A_HUMAN	PRRC2A	2144	Homo sapiens		Isoform 2 of Protein PRRC2A	1	0.999	4	9	0	13	0	0	5	2	0	0	1	1	0	0	0	0	0	0	0	0	0	0	0	0	0	0	0	0	0	0	6	5	0	0	1	1	0	0	0	0
sp|P48637|GSHB_HUMAN	P48637	GSHB_HUMAN	GSS	474	Homo sapiens	1:Experimental evidence at protein level	Glutathione synthetase	1	0.999	5	31	5	31	4	4	1	1	3	6	0	0	1	1	5	5	1	1	0	0	1	0	0	0	0	0	1	1	4	4	1	1	3	6	0	0	1	1	5	5
sp|P48643|TCPE_HUMAN	P48643	TCPE_HUMAN	CCT5	541	Homo sapiens	1:Experimental evidence at protein level	T-complex protein 1 subunit epsilon	1	0.999	18	405	127	405	37	38	25	31	47	37	24	33	34	27	34	38	8	8	14	14	13	13	5	15	10	6	10	11	37	38	25	31	47	37	24	33	34	27	34	38
sp|P48651|PTSS1_HUMAN	P48651	PTSS1_HUMAN	PTDSS1	473	Homo sapiens	1:Experimental evidence at protein level	Phosphatidylserine synthase 1	0.9442	0.9989	1	2	2	2	0	0	0	0	0	0	0	0	0	2	0	0	0	0	0	0	0	0	0	0	0	2	0	0	0	0	0	0	0	0	0	0	0	2	0	0
sp|P48729-2|KC1A_HUMAN	P48729-2	KC1A_HUMAN	CSNK1A1	365	Homo sapiens		Isoform 2 of Casein kinase I isoform alpha	1	0.999	2	28	0	28	4	3	1	2	1	2	1	3	3	2	3	3	0	0	0	0	0	0	0	0	0	0	0	0	4	3	1	2	1	2	1	3	3	2	3	3
sp|P48735-2|IDHP_HUMAN	P48735-2	IDHP_HUMAN	IDH2	400	Homo sapiens		Isoform 2 of Isocitrate dehydrogenase [NADP], mitochondrial	1	0.999	16	536	0	536	67	66	62	61	79	67	25	21	27	21	20	20	0	0	0	0	0	0	0	0	0	0	0	0	67	66	62	61	79	67	25	21	27	21	20	20
sp|P48739-3|PIPNB_HUMAN	P48739-3	PIPNB_HUMAN	PITPNB	273	Homo sapiens		Isoform 3 of Phosphatidylinositol transfer protein beta isoform	1	0.999	9	94	0	94	9	4	6	6	7	11	5	9	9	12	10	6	0	0	0	0	0	0	0	0	0	0	0	0	9	4	6	6	7	11	5	9	9	12	10	6
sp|P48960-2|AGRE5_HUMAN	P48960-2	AGRE5_HUMAN	ADGRE5	742	Homo sapiens		Isoform 2 of Adhesion G protein-coupled receptor E5	1	0.999	3	15	0	15	1	1	1	2	0	2	0	1	2	2	2	1	0	0	0	0	0	0	0	0	0	0	0	0	1	1	1	2	0	2	0	1	2	2	2	1
sp|P49006|MRP_HUMAN	P49006	MRP_HUMAN	MARCKSL1	195	Homo sapiens	1:Experimental evidence at protein level	MARCKS-related protein	1	0.999	6	61	61	74	5	3	0	0	11	10	1	2	6	8	8	7	5	3	0	0	11	10	1	2	6	8	8	7	5	4	4	2	12	11	1	3	7	8	8	9
sp|P49023-2|PAXI_HUMAN	P49023-2	PAXI_HUMAN	PXN	557	Homo sapiens		Isoform Alpha of Paxillin	1	0.999	14	202	0	202	15	22	17	13	20	16	15	11	18	18	19	18	0	0	0	0	0	0	0	0	0	0	0	0	15	22	17	13	20	16	15	11	18	18	19	18
sp|P49137-2|MAPK2_HUMAN	P49137-2	MAPK2_HUMAN	MAPKAPK2	370	Homo sapiens		Isoform 2 of MAP kinase-activated protein kinase 2	0.9469	0.999	1	14	0	14	3	2	0	0	1	1	0	1	2	1	2	1	0	0	0	0	0	0	0	0	0	0	0	0	3	2	0	0	1	1	0	1	2	1	2	1
sp|P49189-2|AL9A1_HUMAN	P49189-2	AL9A1_HUMAN	ALDH9A1	424	Homo sapiens		Isoform 2 of 4-trimethylaminobutyraldehyde dehydrogenase	1	0.999	6	52	0	52	5	4	4	4	7	5	3	3	4	5	6	2	0	0	0	0	0	0	0	0	0	0	0	0	5	4	4	4	7	5	3	3	4	5	6	2
sp|P49207|RL34_HUMAN	P49207	RL34_HUMAN	RPL34	117	Homo sapiens	1:Experimental evidence at protein level	60S ribosomal protein L34	0.9964	0.9981	1	2	2	2	0	1	0	1	0	0	0	0	0	0	0	0	0	1	0	1	0	0	0	0	0	0	0	0	0	1	0	1	0	0	0	0	0	0	0	0
sp|P49247|RPIA_HUMAN	P49247	RPIA_HUMAN	RPIA	311	Homo sapiens	1:Experimental evidence at protein level	Ribose-5-phosphate isomerase	1	0.999	2	15	15	15	2	1	1	1	1	2	1	1	1	1	2	1	2	1	1	1	1	2	1	1	1	1	2	1	2	1	1	1	1	2	1	1	1	1	2	1
sp|P49257|LMAN1_HUMAN	P49257	LMAN1_HUMAN	LMAN1	510	Homo sapiens	1:Experimental evidence at protein level	Protein ERGIC-53	1	0.999	12	167	167	167	17	21	11	6	22	13	6	14	14	14	14	15	17	21	11	6	22	13	6	14	14	14	14	15	17	21	11	6	22	13	6	14	14	14	14	15
sp|P49321|NASP_HUMAN	P49321	NASP_HUMAN	NASP	788	Homo sapiens	1:Experimental evidence at protein level	Nuclear autoantigenic sperm protein	1	0.999	13	72	0	72	4	4	2	0	2	4	9	8	8	9	12	10	0	0	0	0	0	0	0	0	0	0	0	0	4	4	2	0	2	4	9	8	8	9	12	10
sp|P49327|FAS_HUMAN	P49327	FAS_HUMAN	FASN	2511	Homo sapiens	1:Experimental evidence at protein level	Fatty acid synthase	1	0.999	60	1399	1399	1399	118	106	96	85	134	112	112	118	130	137	125	126	118	106	96	85	134	112	112	118	130	137	125	126	118	106	96	85	134	112	112	118	130	137	125	126
sp|P49354-2|FNTA_HUMAN	P49354-2	FNTA_HUMAN	FNTA	312	Homo sapiens		Isoform 2 of Protein farnesyltransferase/geranylgeranyltransferase type-1 subunit alpha	1	0.999	3	15	0	15	1	2	0	0	10	1	0	0	0	0	1	0	0	0	0	0	0	0	0	0	0	0	0	0	1	2	0	0	10	1	0	0	0	0	1	0
sp|P49356-2|FNTB_HUMAN	P49356-2	FNTB_HUMAN	FNTB	391	Homo sapiens		Isoform 2 of Protein farnesyltransferase subunit beta	0.9469	0.999	1	1	0	1	0	0	1	0	0	0	0	0	0	0	0	0	0	0	0	0	0	0	0	0	0	0	0	0	0	0	1	0	0	0	0	0	0	0	0	0
sp|P49368|TCPG_HUMAN	P49368	TCPG_HUMAN	CCT3	545	Homo sapiens	1:Experimental evidence at protein level	T-complex protein 1 subunit gamma	1	0.999	20	445	90	445	36	39	23	23	45	45	30	36	52	39	36	41	6	7	0	0	10	13	6	8	12	8	7	13	36	39	23	23	45	45	30	36	52	39	36	41
sp|P49406|RM19_HUMAN	P49406	RM19_HUMAN	MRPL19	292	Homo sapiens	1:Experimental evidence at protein level	39S ribosomal protein L19, mitochondrial	1	0.999	2	5	5	5	0	0	3	2	0	0	0	0	0	0	0	0	0	0	3	2	0	0	0	0	0	0	0	0	0	0	3	2	0	0	0	0	0	0	0	0
sp|P49407-2|ARRB1_HUMAN	P49407-2	ARRB1_HUMAN	ARRB1	410	Homo sapiens		Isoform 1B of Beta-arrestin-1	1	0.999	8	56	11	56	1	1	9	4	2	5	5	4	5	8	5	7	0	0	0	0	0	1	1	1	1	5	1	1	1	1	9	4	2	5	5	4	5	8	5	7
sp|P49411|EFTU_HUMAN	P49411	EFTU_HUMAN	TUFM	455	Homo sapiens	1:Experimental evidence at protein level	Elongation factor Tu, mitochondrial	1	0.999	21	469	469	469	33	41	43	44	62	53	27	38	31	31	27	39	33	41	43	44	62	53	27	38	31	31	27	39	33	41	43	44	62	53	27	38	31	31	27	39
sp|P49419-2|AL7A1_HUMAN	P49419-2	AL7A1_HUMAN	ALDH7A1	511	Homo sapiens		Isoform 2 of Alpha-aminoadipic semialdehyde dehydrogenase	1	0.999	8	75	13	75	6	9	4	3	8	3	6	5	8	6	9	8	1	2	0	0	1	1	1	1	2	1	2	1	6	9	4	3	8	3	6	5	8	6	9	8
sp|P49441|INPP_HUMAN	P49441	INPP_HUMAN	INPP1	399	Homo sapiens	1:Experimental evidence at protein level	Inositol polyphosphate 1-phosphatase	1	0.999	3	18	18	18	2	7	2	0	2	1	1	1	1	0	1	0	2	7	2	0	2	1	1	1	1	0	1	0	2	7	2	0	2	1	1	1	1	0	1	0
sp|P49458|SRP09_HUMAN	P49458	SRP09_HUMAN	SRP9	86	Homo sapiens	1:Experimental evidence at protein level	Signal recognition particle 9 kDa protein	1	0.999	3	59	10	59	4	4	2	2	5	5	5	5	7	7	7	6	0	0	0	0	0	0	2	0	2	2	3	1	4	4	2	2	5	5	5	5	7	7	7	6
sp|P49459|UBE2A_HUMAN	P49459	UBE2A_HUMAN	UBE2A	152	Homo sapiens	1:Experimental evidence at protein level	Ubiquitin-conjugating enzyme E2 A	0.9469	0.999	1	7	7	7	0	0	2	5	0	0	0	0	0	0	0	0	0	0	2	5	0	0	0	0	0	0	0	0	0	0	2	5	0	0	0	0	0	0	0	0
sp|P49585|PCY1A_HUMAN	P49585	PCY1A_HUMAN	PCYT1A	367	Homo sapiens	1:Experimental evidence at protein level	Choline-phosphate cytidylyltransferase A	1	0.999	4	14	9	14	0	3	0	0	2	1	0	0	2	2	3	1	0	2	0	0	2	0	0	0	1	1	2	1	0	3	0	0	2	1	0	0	2	2	3	1
sp|P49588-2|SYAC_HUMAN	P49588-2	SYAC_HUMAN	AARS1	992	Homo sapiens		Isoform 2 of Alanine--tRNA ligase, cytoplasmic	1	0.999	27	398	0	398	41	44	20	14	50	43	28	31	29	31	34	33	0	0	0	0	0	0	0	0	0	0	0	0	41	44	20	14	50	43	28	31	29	31	34	33
sp|P49589-3|SYCC_HUMAN	P49589-3	SYCC_HUMAN	CARS1	831	Homo sapiens		Isoform 3 of Cysteine--tRNA ligase, cytoplasmic	1	0.999	11	92	0	92	10	12	3	2	11	9	4	3	8	9	12	9	0	0	0	0	0	0	0	0	0	0	0	0	10	12	3	2	11	9	4	3	8	9	12	9
sp|P49591|SYSC_HUMAN	P49591	SYSC_HUMAN	SARS1	514	Homo sapiens	1:Experimental evidence at protein level	Serine--tRNA ligase, cytoplasmic	1	0.999	12	123	123	123	16	14	8	3	16	13	6	6	11	8	10	12	16	14	8	3	16	13	6	6	11	8	10	12	16	14	8	3	16	13	6	6	11	8	10	12
sp|P49662-2|CASP4_HUMAN	P49662-2	CASP4_HUMAN	CASP4	321	Homo sapiens		Isoform 2 of Caspase-4	1	0.999	3	8	0	8	1	0	1	1	3	1	0	0	0	0	1	0	0	0	0	0	0	0	0	0	0	0	0	0	1	0	1	1	3	1	0	0	0	0	1	0
sp|P49711-2|CTCF_HUMAN	P49711-2	CTCF_HUMAN	CTCF	399	Homo sapiens		Isoform 2 of Transcriptional repressor CTCF	1	0.999	3	5	0	5	0	0	2	0	0	0	0	0	1	1	1	0	0	0	0	0	0	0	0	0	0	0	0	0	0	0	2	0	0	0	0	0	1	1	1	0
sp|P49720|PSB3_HUMAN	P49720	PSB3_HUMAN	PSMB3	205	Homo sapiens	1:Experimental evidence at protein level	Proteasome subunit beta type-3	1	0.999	5	56	56	56	4	4	11	11	3	4	2	2	4	4	4	3	4	4	11	11	3	4	2	2	4	4	4	3	4	4	11	11	3	4	2	2	4	4	4	3
sp|P49721|PSB2_HUMAN	P49721	PSB2_HUMAN	PSMB2	201	Homo sapiens	1:Experimental evidence at protein level	Proteasome subunit beta type-2	1	0.999	3	72	72	72	8	9	2	1	8	5	4	5	6	9	8	7	8	9	2	1	8	5	4	5	6	9	8	7	8	9	2	1	8	5	4	5	6	9	8	7
sp|P49736|MCM2_HUMAN	P49736	MCM2_HUMAN	MCM2	904	Homo sapiens	1:Experimental evidence at protein level	DNA replication licensing factor MCM2	1	0.999	6	27	27	27	0	0	1	2	0	0	5	3	4	2	5	5	0	0	1	2	0	0	5	3	4	2	5	5	0	0	1	2	0	0	5	3	4	2	5	5
sp|P49748-3|ACADV_HUMAN	P49748-3	ACADV_HUMAN	ACADVL	678	Homo sapiens		Isoform 3 of Very long-chain specific acyl-CoA dehydrogenase, mitochondrial	1	0.999	7	52	0	52	7	6	6	6	5	4	2	3	4	2	4	3	0	0	0	0	0	0	0	0	0	0	0	0	7	6	6	6	5	4	2	3	4	2	4	3
sp|P49750|YLPM1_HUMAN	P49750	YLPM1_HUMAN	YLPM1	2146	Homo sapiens	1:Experimental evidence at protein level	YLP motif-containing protein 1	1	0.999	10	44	2	44	0	0	7	10	3	2	1	2	5	4	8	2	0	0	1	1	0	0	0	0	0	0	0	0	0	0	7	10	3	2	1	2	5	4	8	2
sp|P49753-2|ACOT2_HUMAN	P49753-2	ACOT2_HUMAN	ACOT2	301	Homo sapiens		Isoform 2 of Acyl-coenzyme A thioesterase 2, mitochondrial	1	0.999	3	24	0	24	1	1	1	1	2	3	2	1	5	1	3	3	0	0	0	0	0	0	0	0	0	0	0	0	1	1	1	1	2	3	2	1	5	1	3	3
sp|P49755|TMEDA_HUMAN	P49755	TMEDA_HUMAN	TMED10	219	Homo sapiens	1:Experimental evidence at protein level	Transmembrane emp24 domain-containing protein 10	1	0.999	5	51	51	51	4	3	5	6	7	4	2	4	3	4	5	4	4	3	5	6	7	4	2	4	3	4	5	4	4	3	5	6	7	4	2	4	3	4	5	4
sp|P49756|RBM25_HUMAN	P49756	RBM25_HUMAN	RBM25	843	Homo sapiens	1:Experimental evidence at protein level	RNA-binding protein 25	1	0.999	11	105	40	105	6	7	10	10	2	9	9	7	10	12	11	12	4	3	4	4	1	4	2	2	3	5	5	3	6	7	10	10	2	9	9	7	10	12	11	12
sp|P49757-2|NUMB_HUMAN	P49757-2	NUMB_HUMAN	NUMB	603	Homo sapiens		Isoform 2 of Protein numb homolog	1	0.999	4	28	0	28	1	2	2	4	6	2	3	2	2	1	1	2	0	0	0	0	0	0	0	0	0	0	0	0	1	2	2	4	6	2	3	2	2	1	1	2
sp|P49761-1|CLK3_HUMAN	P49761-1	CLK3_HUMAN	CLK3	490	Homo sapiens		Isoform 1 of Dual specificity protein kinase CLK3	0.9469	0.999	1	2	0	2	0	0	1	1	0	0	0	0	0	0	0	0	0	0	0	0	0	0	0	0	0	0	0	0	0	0	1	1	0	0	0	0	0	0	0	0
sp|P49770|EI2BB_HUMAN	P49770	EI2BB_HUMAN	EIF2B2	351	Homo sapiens	1:Experimental evidence at protein level	Translation initiation factor eIF-2B subunit beta	1	0.999	5	45	45	45	7	7	1	1	4	2	2	2	5	4	4	6	7	7	1	1	4	2	2	2	5	4	4	6	7	7	1	1	4	2	2	2	5	4	4	6
sp|P49773|HINT1_HUMAN	P49773	HINT1_HUMAN	HINT1	126	Homo sapiens	1:Experimental evidence at protein level	Adenosine 5'-monophosphoramidase HINT1	1	0.999	7	246	246	246	21	19	31	29	18	18	14	21	22	17	16	20	21	19	31	29	18	18	14	21	22	17	16	20	21	19	31	29	18	18	14	21	22	17	16	20
sp|P49789|FHIT_HUMAN	P49789	FHIT_HUMAN	FHIT	147	Homo sapiens	1:Experimental evidence at protein level	Bis(5'-adenosyl)-triphosphatase	0.8895	0.9978	1	1	1	1	0	1	0	0	0	0	0	0	0	0	0	0	0	1	0	0	0	0	0	0	0	0	0	0	0	1	0	0	0	0	0	0	0	0	0	0
sp|P49790-2|NU153_HUMAN	P49790-2	NU153_HUMAN	NUP153	1433	Homo sapiens		Isoform 2 of Nuclear pore complex protein Nup153	1	0.999	11	38	0	38	1	3	7	4	1	2	1	4	4	6	3	2	0	0	0	0	0	0	0	0	0	0	0	0	1	3	7	4	1	2	1	4	4	6	3	2
sp|P49792|RBP2_HUMAN	P49792	RBP2_HUMAN	RANBP2	3224	Homo sapiens	1:Experimental evidence at protein level	E3 SUMO-protein ligase RanBP2	1	0.999	25	190	117	190	12	15	11	7	16	14	15	21	24	19	18	18	7	13	6	4	14	8	11	12	11	10	10	11	12	15	11	7	16	14	15	21	24	19	18	18
sp|P49821-2|NDUV1_HUMAN	P49821-2	NDUV1_HUMAN	NDUFV1	455	Homo sapiens		Isoform 2 of NADH dehydrogenase [ubiquinone] flavoprotein 1, mitochondrial	1	0.999	10	97	0	97	10	11	6	6	13	7	6	11	10	7	5	5	0	0	0	0	0	0	0	0	0	0	0	0	10	11	6	6	13	7	6	11	10	7	5	5
sp|P49840|GSK3A_HUMAN	P49840	GSK3A_HUMAN	GSK3A	483	Homo sapiens	1:Experimental evidence at protein level	Glycogen synthase kinase-3 alpha	1	0.999	2	4	4	4	0	0	2	0	0	1	0	0	0	0	1	0	0	0	2	0	0	1	0	0	0	0	1	0	0	0	2	0	0	1	0	0	0	0	1	0
sp|P49841-2|GSK3B_HUMAN	P49841-2	GSK3B_HUMAN	GSK3B	433	Homo sapiens		Isoform 2 of Glycogen synthase kinase-3 beta	1	0.999	3	39	0	39	3	2	4	4	5	2	4	5	1	2	3	4	0	0	0	0	0	0	0	0	0	0	0	0	3	2	4	4	5	2	4	5	1	2	3	4
sp|P49902-2|5NTC_HUMAN	P49902-2	5NTC_HUMAN	NT5C2	532	Homo sapiens		Isoform 2 of Cytosolic purine 5'-nucleotidase	1	0.999	8	83	0	83	6	8	14	7	10	5	3	5	6	6	5	8	0	0	0	0	0	0	0	0	0	0	0	0	6	8	14	7	10	5	3	5	6	6	5	8
sp|P49903-3|SPS1_HUMAN	P49903-3	SPS1_HUMAN	SEPHS1	325	Homo sapiens		Isoform 3 of Selenide, water dikinase 1	1	0.999	4	20	0	20	1	1	3	2	1	2	3	2	1	1	1	2	0	0	0	0	0	0	0	0	0	0	0	0	1	1	3	2	1	2	3	2	1	1	1	2
sp|P49914-2|MTHFS_HUMAN	P49914-2	MTHFS_HUMAN	MTHFS	179	Homo sapiens		Isoform 2 of 5-formyltetrahydrofolate cyclo-ligase	1	0.999	2	16	0	16	0	0	3	2	0	2	1	3	1	1	1	2	0	0	0	0	0	0	0	0	0	0	0	0	0	0	3	2	0	2	1	3	1	1	1	2
sp|P49915|GUAA_HUMAN	P49915	GUAA_HUMAN	GMPS	693	Homo sapiens	1:Experimental evidence at protein level	GMP synthase [glutamine-hydrolyzing]	1	0.999	14	105	2	105	9	7	7	4	9	7	7	11	10	10	7	17	0	0	0	0	0	0	0	0	0	0	1	1	9	7	7	4	9	7	7	11	10	10	7	17
sp|P49916-2|DNLI3_HUMAN	P49916-2	DNLI3_HUMAN	LIG3	949	Homo sapiens		Isoform 2 of DNA ligase 3	0.9468	0.999	1	2	0	2	0	0	1	1	0	0	0	0	0	0	0	0	0	0	0	0	0	0	0	0	0	0	0	0	0	0	1	1	0	0	0	0	0	0	0	0
sp|P49959-2|MRE11_HUMAN	P49959-2	MRE11_HUMAN	MRE11	680	Homo sapiens		Isoform 2 of Double-strand break repair protein MRE11	1	0.999	7	29	0	29	0	0	4	7	3	3	2	3	1	2	3	1	0	0	0	0	0	0	0	0	0	0	0	0	0	0	4	7	3	3	2	3	1	2	3	1
sp|P50053-2|KHK_HUMAN	P50053-2	KHK_HUMAN	KHK	298	Homo sapiens		Isoform A of Ketohexokinase	0.9469	0.999	1	7	0	7	0	0	0	0	0	0	1	1	1	1	1	2	0	0	0	0	0	0	0	0	0	0	0	0	0	0	0	0	0	0	1	1	1	1	1	2
sp|P50135|HNMT_HUMAN	P50135	HNMT_HUMAN	HNMT	292	Homo sapiens	1:Experimental evidence at protein level	Histamine N-methyltransferase	1	0.999	4	51	17	51	8	4	3	2	2	1	8	3	5	3	6	6	4	2	0	0	0	0	5	0	1	0	3	2	8	4	3	2	2	1	8	3	5	3	6	6
sp|P50151|GBG10_HUMAN	P50151	GBG10_HUMAN	GNG10	68	Homo sapiens	1:Experimental evidence at protein level	Guanine nucleotide-binding protein G(I)/G(S)/G(O) subunit gamma-10	1	0.999	2	21	0	21	2	1	2	1	3	2	2	1	1	1	3	2	0	0	0	0	0	0	0	0	0	0	0	0	2	1	2	1	3	2	2	1	1	1	3	2
sp|P50213-2|IDH3A_HUMAN	P50213-2	IDH3A_HUMAN	IDH3A	288	Homo sapiens		Isoform 2 of Isocitrate dehydrogenase [NAD] subunit alpha, mitochondrial	1	0.999	7	63	0	63	2	5	5	8	7	3	5	4	6	4	9	5	0	0	0	0	0	0	0	0	0	0	0	0	2	5	5	8	7	3	5	4	6	4	9	5
sp|P50238|CRIP1_HUMAN	P50238	CRIP1_HUMAN	CRIP1	77	Homo sapiens	1:Experimental evidence at protein level	Cysteine-rich protein 1	1	0.999	4	105	105	105	8	8	7	14	8	7	12	8	7	10	6	10	8	8	7	14	8	7	12	8	7	10	6	10	8	8	7	14	8	7	12	8	7	10	6	10
sp|P50395-2|GDIB_HUMAN	P50395-2	GDIB_HUMAN	GDI2	400	Homo sapiens		Isoform 2 of Rab GDP dissociation inhibitor beta	1	0.999	23	482	0	482	31	38	62	43	55	40	31	35	33	32	40	42	0	0	0	0	0	0	0	0	0	0	0	0	31	38	62	43	55	40	31	35	33	32	40	42
sp|P50402|EMD_HUMAN	P50402	EMD_HUMAN	EMD	254	Homo sapiens	1:Experimental evidence at protein level	Emerin	1	0.999	9	86	86	86	10	9	3	4	9	5	4	10	5	10	10	7	10	9	3	4	9	5	4	10	5	10	10	7	10	9	3	4	9	5	4	10	5	10	10	7
sp|P50416-2|CPT1A_HUMAN	P50416-2	CPT1A_HUMAN	CPT1A	756	Homo sapiens		Isoform 2 of Carnitine O-palmitoyltransferase 1, liver isoform	1	0.999	4	21	0	21	5	4	2	2	6	1	0	0	1	0	0	0	0	0	0	0	0	0	0	0	0	0	0	0	5	4	2	2	6	1	0	0	1	0	0	0
sp|P50440-2|GATM_HUMAN	P50440-2	GATM_HUMAN	GATM	391	Homo sapiens		Isoform 2 of Glycine amidinotransferase, mitochondrial	1	0.999	7	103	0	103	7	6	6	5	10	10	7	10	13	10	10	9	0	0	0	0	0	0	0	0	0	0	0	0	7	6	6	5	10	10	7	10	13	10	10	9
sp|P50453|SPB9_HUMAN	P50453	SPB9_HUMAN	SERPINB9	376	Homo sapiens	1:Experimental evidence at protein level	Serpin B9	1	0.999	6	31	30	31	3	1	4	2	2	2	2	2	4	3	3	3	3	1	3	2	2	2	2	2	4	3	3	3	3	1	4	2	2	2	2	2	4	3	3	3
sp|P50454|SERPH_HUMAN	P50454	SERPH_HUMAN	SERPINH1	418	Homo sapiens	1:Experimental evidence at protein level	Serpin H1	1	0.999	6	68	68	68	7	5	5	6	7	7	4	5	6	5	6	5	7	5	5	6	7	7	4	5	6	5	6	5	7	5	5	6	7	7	4	5	6	5	6	5
sp|P50502|F10A1_HUMAN	P50502	F10A1_HUMAN	ST13	369	Homo sapiens	1:Experimental evidence at protein level	Hsc70-interacting protein	1	0.999	3	86	0	86	4	5	12	12	6	8	8	8	6	6	6	5	0	0	0	0	0	0	0	0	0	0	0	0	4	5	12	12	6	8	8	8	6	6	6	5
sp|P50552|VASP_HUMAN	P50552	VASP_HUMAN	VASP	380	Homo sapiens	1:Experimental evidence at protein level	Vasodilator-stimulated phosphoprotein	1	0.999	11	209	209	209	22	24	9	9	21	25	16	16	15	19	18	15	22	24	9	9	21	25	16	16	15	19	18	15	22	24	9	9	21	25	16	16	15	19	18	15
sp|P50570-2|DYN2_HUMAN	P50570-2	DYN2_HUMAN	DNM2	866	Homo sapiens		Isoform 2 of Dynamin-2	1	0.999	22	194	0	194	20	30	17	9	28	27	8	9	11	13	11	11	0	0	0	0	0	0	0	0	0	0	0	0	20	30	17	9	28	27	8	9	11	13	11	11
sp|P50579|MAP2_HUMAN	P50579	MAP2_HUMAN	METAP2	478	Homo sapiens	1:Experimental evidence at protein level	Methionine aminopeptidase 2	1	0.999	8	91	0	91	8	5	8	8	5	10	6	7	8	8	11	7	0	0	0	0	0	0	0	0	0	0	0	0	8	5	8	8	5	10	6	7	8	8	11	7
sp|P50583|AP4A_HUMAN	P50583	AP4A_HUMAN	NUDT2	147	Homo sapiens	1:Experimental evidence at protein level	Bis(5'-nucleosyl)-tetraphosphatase [asymmetrical]	1	0.999	2	7	7	7	1	2	0	0	2	1	0	0	0	0	0	1	1	2	0	0	2	1	0	0	0	0	0	1	1	2	0	0	2	1	0	0	0	0	0	1
sp|P50613|CDK7_HUMAN	P50613	CDK7_HUMAN	CDK7	346	Homo sapiens	1:Experimental evidence at protein level	Cyclin-dependent kinase 7	0.8356	0.9965	1	2	2	2	0	0	1	1	0	0	0	0	0	0	0	0	0	0	1	1	0	0	0	0	0	0	0	0	0	0	1	1	0	0	0	0	0	0	0	0
sp|P50747-2|BPL1_HUMAN	P50747-2	BPL1_HUMAN	HLCS	873	Homo sapiens		Isoform 2 of Biotin--protein ligase	0.9466	0.999	1	2	0	2	0	0	1	1	0	0	0	0	0	0	0	0	0	0	0	0	0	0	0	0	0	0	0	0	0	0	1	1	0	0	0	0	0	0	0	0
sp|P50750-2|CDK9_HUMAN	P50750-2	CDK9_HUMAN	CDK9	489	Homo sapiens		Isoform 2 of Cyclin-dependent kinase 9	1	0.999	3	14	1	14	0	1	1	0	0	0	1	3	4	1	0	3	0	0	1	0	0	0	0	0	0	0	0	0	0	1	1	0	0	0	1	3	4	1	0	3
sp|P50851-2|LRBA_HUMAN	P50851-2	LRBA_HUMAN	LRBA	2851	Homo sapiens		Isoform 2 of Lipopolysaccharide-responsive and beige-like anchor protein	1	0.999	19	13	13	135	1	1	1	1	1	1	2	1	1	1	1	1	1	1	1	1	1	1	2	1	1	1	1	1	13	14	13	13	18	12	9	7	6	9	11	10
sp|P50851|LRBA_HUMAN	P50851	LRBA_HUMAN	LRBA	2863	Homo sapiens	1:Experimental evidence at protein level	Lipopolysaccharide-responsive and beige-like anchor protein	1	0.999	19	136	14	136	15	15	12	12	18	11	7	7	6	10	12	11	3	2	0	0	1	0	0	1	1	2	2	2	15	15	12	12	18	11	7	7	6	10	12	11
sp|P50897|PPT1_HUMAN	P50897	PPT1_HUMAN	PPT1	306	Homo sapiens	1:Experimental evidence at protein level	Palmitoyl-protein thioesterase 1	1	0.999	2	41	10	41	2	2	4	4	4	2	2	3	3	5	4	6	0	0	0	0	3	1	0	0	1	1	2	2	2	2	4	4	4	2	2	3	3	5	4	6
sp|P50914|RL14_HUMAN	P50914	RL14_HUMAN	RPL14	215	Homo sapiens	1:Experimental evidence at protein level	60S ribosomal protein L14	0.9469	0.999	1	18	18	18	1	2	1	1	2	0	2	2	2	1	2	2	1	2	1	1	2	0	2	2	2	1	2	2	1	2	1	1	2	0	2	2	2	1	2	2
sp|P50990-2|TCPQ_HUMAN	P50990-2	TCPQ_HUMAN	CCT8	529	Homo sapiens		Isoform 2 of T-complex protein 1 subunit theta	1	0.999	16	205	0	205	19	22	14	15	20	16	14	12	16	14	23	20	0	0	0	0	0	0	0	0	0	0	0	0	19	22	14	15	20	16	14	12	16	14	23	20
sp|P50991|TCPD_HUMAN	P50991	TCPD_HUMAN	CCT4	539	Homo sapiens	1:Experimental evidence at protein level	T-complex protein 1 subunit delta	1	0.999	13	199	21	219	14	21	22	13	29	19	13	12	13	14	13	16	1	4	1	1	4	1	3	1	1	1	2	1	16	22	24	16	32	19	14	15	14	15	14	18
sp|P50995-2|ANX11_HUMAN	P50995-2	ANX11_HUMAN	ANXA11	472	Homo sapiens		Isoform 2 of Annexin A11	1	0.999	6	168	0	168	11	10	7	10	17	19	15	11	15	14	21	18	0	0	0	0	0	0	0	0	0	0	0	0	11	10	7	10	17	19	15	11	15	14	21	18
sp|P51003|PAPOA_HUMAN	P51003	PAPOA_HUMAN	PAPOLA	745	Homo sapiens	1:Experimental evidence at protein level	Poly(A) polymerase alpha	1	0.999	4	28	0	28	2	1	0	1	3	1	3	5	4	4	1	3	0	0	0	0	0	0	0	0	0	0	0	0	2	1	0	1	3	1	3	5	4	4	1	3
sp|P51114-2|FXR1_HUMAN	P51114-2	FXR1_HUMAN	FXR1	539	Homo sapiens		Isoform 2 of RNA-binding protein FXR1	1	0.999	6	22	0	22	0	2	1	5	3	4	1	1	2	1	1	1	0	0	0	0	0	0	0	0	0	0	0	0	0	2	1	5	3	4	1	1	2	1	1	1
sp|P51116|FXR2_HUMAN	P51116	FXR2_HUMAN	FXR2	673	Homo sapiens	1:Experimental evidence at protein level	RNA-binding protein FXR2	1	0.9986	4	3	3	18	1	0	1	0	0	0	0	0	0	1	0	0	1	0	1	0	0	0	0	0	0	1	0	0	1	0	3	2	1	1	1	2	3	2	1	1
sp|P51148-2|RAB5C_HUMAN	P51148-2	RAB5C_HUMAN	RAB5C	249	Homo sapiens		Isoform 2 of Ras-related protein Rab-5C	1	0.999	6	34	0	34	7	4	3	2	3	3	1	1	1	2	3	4	0	0	0	0	0	0	0	0	0	0	0	0	7	4	3	2	3	3	1	1	1	2	3	4
sp|P51149|RAB7A_HUMAN	P51149	RAB7A_HUMAN	RAB7A	207	Homo sapiens	1:Experimental evidence at protein level	Ras-related protein Rab-7a	1	0.999	5	35	35	35	6	2	3	3	1	3	2	2	5	3	3	2	6	2	3	3	1	3	2	2	5	3	3	2	6	2	3	3	1	3	2	2	5	3	3	2
sp|P51151|RAB9A_HUMAN	P51151	RAB9A_HUMAN	RAB9A	201	Homo sapiens	1:Experimental evidence at protein level	Ras-related protein Rab-9A	0.9469	0.999	1	2	2	2	0	1	0	0	1	0	0	0	0	0	0	0	0	1	0	0	1	0	0	0	0	0	0	0	0	1	0	0	1	0	0	0	0	0	0	0
sp|P51397|DAP1_HUMAN	P51397	DAP1_HUMAN	DAP	102	Homo sapiens	1:Experimental evidence at protein level	Death-associated protein 1	1	0.999	3	101	101	101	10	8	20	16	6	9	4	7	6	6	5	4	10	8	20	16	6	9	4	7	6	6	5	4	10	8	20	16	6	9	4	7	6	6	5	4
sp|P51398-2|RT29_HUMAN	P51398-2	RT29_HUMAN	DAP3	357	Homo sapiens		Isoform 2 of 28S ribosomal protein S29, mitochondrial	1	0.999	1	20	0	20	2	2	4	2	1	1	2	2	1	1	1	1	0	0	0	0	0	0	0	0	0	0	0	0	2	2	4	2	1	1	2	2	1	1	1	1
sp|P51452-2|DUS3_HUMAN	P51452-2	DUS3_HUMAN	DUSP3	144	Homo sapiens		Isoform 2 of Dual specificity protein phosphatase 3	0.9994	0.999	1	12	0	12	1	0	1	1	0	1	1	0	2	2	2	1	0	0	0	0	0	0	0	0	0	0	0	0	1	0	1	1	0	1	1	0	2	2	2	1
sp|P51531-2|SMCA2_HUMAN	P51531-2	SMCA2_HUMAN	SMARCA2	1572	Homo sapiens		Isoform Short of Probable global transcription activator SNF2L2	1	0.999	8	7	0	24	0	0	3	1	2	0	0	0	0	0	1	0	0	0	0	0	0	0	0	0	0	0	0	0	0	0	8	2	3	3	2	1	0	1	2	2
sp|P51532-2|SMCA4_HUMAN	P51532-2	SMCA4_HUMAN	SMARCA4	1614	Homo sapiens		Isoform 2 of Transcription activator BRG1	1	0.999	7	27	0	27	0	0	6	2	1	4	3	2	0	3	3	3	0	0	0	0	0	0	0	0	0	0	0	0	0	0	6	2	1	4	3	2	0	3	3	3
sp|P51553-2|IDH3G_HUMAN	P51553-2	IDH3G_HUMAN	IDH3G	380	Homo sapiens		Isoform 2 of Isocitrate dehydrogenase [NAD] subunit gamma, mitochondrial	1	0.999	8	95	0	95	8	13	8	7	12	10	4	5	7	5	10	6	0	0	0	0	0	0	0	0	0	0	0	0	8	13	8	7	12	10	4	5	7	5	10	6
sp|P51571|SSRD_HUMAN	P51571	SSRD_HUMAN	SSR4	173	Homo sapiens	1:Experimental evidence at protein level	Translocon-associated protein subunit delta	1	0.999	2	40	40	40	3	3	0	0	4	4	3	1	6	6	6	4	3	3	0	0	4	4	3	1	6	6	6	4	3	3	0	0	4	4	3	1	6	6	6	4
sp|P51572-2|BAP31_HUMAN	P51572-2	BAP31_HUMAN	BCAP31	313	Homo sapiens		Isoform 2 of B-cell receptor-associated protein 31	1	0.999	13	238	0	238	24	18	16	13	25	24	12	19	19	26	24	18	0	0	0	0	0	0	0	0	0	0	0	0	24	18	16	13	25	24	12	19	19	26	24	18
sp|P51580|TPMT_HUMAN	P51580	TPMT_HUMAN	TPMT	245	Homo sapiens	1:Experimental evidence at protein level	Thiopurine S-methyltransferase	1	0.999	3	16	16	16	3	2	0	0	5	2	1	1	0	2	0	0	3	2	0	0	5	2	1	1	0	2	0	0	3	2	0	0	5	2	1	1	0	2	0	0
sp|P51608-2|MECP2_HUMAN	P51608-2	MECP2_HUMAN	MECP2	498	Homo sapiens		Isoform B of Methyl-CpG-binding protein 2	1	0.999	6	64	46	64	11	8	3	3	9	3	6	3	5	3	6	4	7	4	2	1	7	2	6	3	4	2	5	3	11	8	3	3	9	3	6	3	5	3	6	4
sp|P51610-2|HCFC1_HUMAN	P51610-2	HCFC1_HUMAN	HCFC1	1966	Homo sapiens		Isoform 2 of Host cell factor 1	1	0.999	10	86	0	86	5	5	3	5	6	7	9	10	10	11	8	7	0	0	0	0	0	0	0	0	0	0	0	0	5	5	3	5	6	7	9	10	10	11	8	7
sp|P51617|IRAK1_HUMAN	P51617	IRAK1_HUMAN	IRAK1	712	Homo sapiens	1:Experimental evidence at protein level	Interleukin-1 receptor-associated kinase 1	1	0.999	2	6	5	6	0	0	1	1	1	2	0	0	0	1	0	0	0	0	1	1	0	2	0	0	0	1	0	0	0	0	1	1	1	2	0	0	0	1	0	0
sp|P51648-2|AL3A2_HUMAN	P51648-2	AL3A2_HUMAN	ALDH3A2	508	Homo sapiens		Isoform 2 of Aldehyde dehydrogenase family 3 member A2	1	0.999	9	105	0	105	6	9	6	7	8	5	6	7	13	10	15	13	0	0	0	0	0	0	0	0	0	0	0	0	6	9	6	7	8	5	6	7	13	10	15	13
sp|P51649-2|SSDH_HUMAN	P51649-2	SSDH_HUMAN	ALDH5A1	548	Homo sapiens		Isoform 2 of Succinate-semialdehyde dehydrogenase, mitochondrial	1	0.999	4	55	0	55	3	5	2	1	7	4	5	3	9	6	6	4	0	0	0	0	0	0	0	0	0	0	0	0	3	5	2	1	7	4	5	3	9	6	6	4
sp|P51659-2|DHB4_HUMAN	P51659-2	DHB4_HUMAN	HSD17B4	761	Homo sapiens		Isoform 2 of Peroxisomal multifunctional enzyme type 2	1	0.999	21	342	1	342	34	33	31	28	35	36	19	20	23	25	27	31	0	0	0	0	0	1	0	0	0	0	0	0	34	33	31	28	35	36	19	20	23	25	27	31
sp|P51665|PSMD7_HUMAN	P51665	PSMD7_HUMAN	PSMD7	324	Homo sapiens	1:Experimental evidence at protein level	26S proteasome non-ATPase regulatory subunit 7	1	0.999	6	59	59	59	4	2	4	5	12	6	4	4	3	3	6	6	4	2	4	5	12	6	4	4	3	3	6	6	4	2	4	5	12	6	4	4	3	3	6	6
sp|P51668|UB2D1_HUMAN	P51668	UB2D1_HUMAN	UBE2D1	147	Homo sapiens	1:Experimental evidence at protein level	Ubiquitin-conjugating enzyme E2 D1	0.9443	0.9989	1	2	0	2	0	0	0	0	1	1	0	0	0	0	0	0	0	0	0	0	0	0	0	0	0	0	0	0	0	0	0	0	1	1	0	0	0	0	0	0
sp|P51784|UBP11_HUMAN	P51784	UBP11_HUMAN	USP11	963	Homo sapiens	1:Experimental evidence at protein level	Ubiquitin carboxyl-terminal hydrolase 11	1	0.999	3	11	3	11	0	1	3	2	1	1	0	1	0	0	0	2	0	0	2	1	0	0	0	0	0	0	0	0	0	1	3	2	1	1	0	1	0	0	0	2
sp|P51790-2|CLCN3_HUMAN	P51790-2	CLCN3_HUMAN	CLCN3	866	Homo sapiens		Isoform 2 of H(+)/Cl(-) exchange transporter 3	0.9469	0.999	1	2	0	2	0	1	0	0	1	0	0	0	0	0	0	0	0	0	0	0	0	0	0	0	0	0	0	0	0	1	0	0	1	0	0	0	0	0	0	0
sp|P51808|DYLT3_HUMAN	P51808	DYLT3_HUMAN	DYNLT3	116	Homo sapiens	1:Experimental evidence at protein level	Dynein light chain Tctex-type 3	1	0.999	2	34	34	34	1	1	4	3	3	4	3	3	3	2	3	4	1	1	4	3	3	4	3	3	3	2	3	4	1	1	4	3	3	4	3	3	3	2	3	4
sp|P51812|KS6A3_HUMAN	P51812	KS6A3_HUMAN	RPS6KA3	740	Homo sapiens	1:Experimental evidence at protein level	Ribosomal protein S6 kinase alpha-3	1	0.999	8	16	16	76	1	3	3	2	1	2	0	0	1	2	0	1	1	3	3	2	1	2	0	0	1	2	0	1	9	9	6	5	12	10	1	4	4	7	5	4
sp|P51858-2|HDGF_HUMAN	P51858-2	HDGF_HUMAN	HDGF	233	Homo sapiens		Isoform 2 of Hepatoma-derived growth factor	1	0.999	10	160	0	160	10	14	13	8	17	17	11	11	13	15	13	18	0	0	0	0	0	0	0	0	0	0	0	0	10	14	13	8	17	17	11	11	13	15	13	18
sp|P51970|NDUA8_HUMAN	P51970	NDUA8_HUMAN	NDUFA8	172	Homo sapiens	1:Experimental evidence at protein level	NADH dehydrogenase [ubiquinone] 1 alpha subcomplex subunit 8	1	0.999	4	57	57	57	4	2	6	10	4	5	1	7	6	5	4	3	4	2	6	10	4	5	1	7	6	5	4	3	4	2	6	10	4	5	1	7	6	5	4	3
sp|P51991-2|ROA3_HUMAN	P51991-2	ROA3_HUMAN	HNRNPA3	356	Homo sapiens		Isoform 2 of Heterogeneous nuclear ribonucleoprotein A3	1	0.999	16	44	44	445	3	1	4	3	6	5	1	2	7	2	5	5	3	1	4	3	6	5	1	2	7	2	5	5	25	22	27	26	31	25	54	35	52	37	60	51
sp|P51991|ROA3_HUMAN	P51991	ROA3_HUMAN	HNRNPA3	378	Homo sapiens	1:Experimental evidence at protein level	Heterogeneous nuclear ribonucleoprotein A3	1	0.999	21	563	165	566	27	28	42	38	33	31	64	53	64	53	68	62	5	7	19	15	8	11	11	20	20	19	14	16	27	28	42	38	33	31	64	53	65	54	69	62
sp|P52209-2|6PGD_HUMAN	P52209-2	6PGD_HUMAN	PGD	470	Homo sapiens		Isoform 2 of 6-phosphogluconate dehydrogenase, decarboxylating	1	0.999	13	381	0	381	28	30	27	27	44	34	34	34	29	33	32	29	0	0	0	0	0	0	0	0	0	0	0	0	28	30	27	27	44	34	34	34	29	33	32	29
sp|P52272-2|HNRPM_HUMAN	P52272-2	HNRPM_HUMAN	HNRNPM	691	Homo sapiens		Isoform 2 of Heterogeneous nuclear ribonucleoprotein M	1	0.999	21	566	0	566	46	59	21	20	44	46	62	43	49	55	65	56	0	0	0	0	0	0	0	0	0	0	0	0	46	59	21	20	44	46	62	43	49	55	65	56
sp|P52292|IMA1_HUMAN	P52292	IMA1_HUMAN	KPNA2	529	Homo sapiens	1:Experimental evidence at protein level	Importin subunit alpha-1	0.9285	0.9986	1	1	1	1	0	1	0	0	0	0	0	0	0	0	0	0	0	1	0	0	0	0	0	0	0	0	0	0	0	1	0	0	0	0	0	0	0	0	0	0
sp|P52298-2|NCBP2_HUMAN	P52298-2	NCBP2_HUMAN	NCBP2	138	Homo sapiens		Isoform 2 of Nuclear cap-binding protein subunit 2	0.8544	0.997	1	5	0	5	0	0	2	0	0	0	0	0	1	0	1	1	0	0	0	0	0	0	0	0	0	0	0	0	0	0	2	0	0	0	0	0	1	0	1	1
sp|P52306|GDS1_HUMAN	P52306	GDS1_HUMAN	RAP1GDS1	607	Homo sapiens	1:Experimental evidence at protein level	Rap1 GTPase-GDP dissociation stimulator 1	1	0.999	9	60	0	60	6	5	6	5	4	5	4	4	3	5	5	8	0	0	0	0	0	0	0	0	0	0	0	0	6	5	6	5	4	5	4	4	3	5	5	8
sp|P52434-3|RPAB3_HUMAN	P52434-3	RPAB3_HUMAN	POLR2H	114	Homo sapiens		Isoform 3 of DNA-directed RNA polymerases I, II, and III subunit RPABC3	1	0.999	2	18	0	18	1	1	1	0	2	2	2	2	1	2	2	2	0	0	0	0	0	0	0	0	0	0	0	0	1	1	1	0	2	2	2	2	1	2	2	2
sp|P52435|RPB11_HUMAN	P52435	RPB11_HUMAN	POLR2J	117	Homo sapiens	1:Experimental evidence at protein level	DNA-directed RNA polymerase II subunit RPB11-a	0.9469	0.999	1	13	13	13	0	0	0	0	1	3	1	3	1	1	1	2	0	0	0	0	1	3	1	3	1	1	1	2	0	0	0	0	1	3	1	3	1	1	1	2
sp|P52565|GDIR1_HUMAN	P52565	GDIR1_HUMAN	ARHGDIA	204	Homo sapiens	1:Experimental evidence at protein level	Rho GDP-dissociation inhibitor 1	1	0.999	6	234	40	234	23	17	19	22	20	20	19	19	20	18	21	16	6	4	2	1	4	2	4	3	5	2	3	4	23	17	19	22	20	20	19	19	20	18	21	16
sp|P52594-2|AGFG1_HUMAN	P52594-2	AGFG1_HUMAN	AGFG1	522	Homo sapiens		Isoform 2 of Arf-GAP domain and FG repeat-containing protein 1	1	0.999	3	28	0	28	3	2	3	2	1	5	1	2	2	3	3	1	0	0	0	0	0	0	0	0	0	0	0	0	3	2	3	2	1	5	1	2	2	3	3	1
sp|P52597|HNRPF_HUMAN	P52597	HNRPF_HUMAN	HNRNPF	415	Homo sapiens	1:Experimental evidence at protein level	Heterogeneous nuclear ribonucleoprotein F	1	0.999	15	692	579	692	57	48	41	53	52	57	64	43	72	66	63	76	44	32	41	53	46	51	49	42	56	56	52	57	57	48	41	53	52	57	64	43	72	66	63	76
sp|P52735-2|VAV2_HUMAN	P52735-2	VAV2_HUMAN	VAV2	868	Homo sapiens		Isoform 2 of Guanine nucleotide exchange factor VAV2	1	0.999	11	58	0	58	5	1	9	6	4	2	2	9	6	5	3	6	0	0	0	0	0	0	0	0	0	0	0	0	5	1	9	6	4	2	2	9	6	5	3	6
sp|P52758|RIDA_HUMAN	P52758	RIDA_HUMAN	RIDA	137	Homo sapiens	1:Experimental evidence at protein level	2-iminobutanoate/2-iminopropanoate deaminase	0.9469	0.999	1	1	1	1	1	0	0	0	0	0	0	0	0	0	0	0	1	0	0	0	0	0	0	0	0	0	0	0	1	0	0	0	0	0	0	0	0	0	0	0
sp|P52788|SPSY_HUMAN	P52788	SPSY_HUMAN	SMS	366	Homo sapiens	1:Experimental evidence at protein level	Spermine synthase	1	0.999	6	37	2	37	4	3	2	2	6	4	1	3	2	3	4	3	1	0	0	0	1	0	0	0	0	0	0	0	4	3	2	2	6	4	1	3	2	3	4	3
sp|P52789|HXK2_HUMAN	P52789	HXK2_HUMAN	HK2	917	Homo sapiens	1:Experimental evidence at protein level	Hexokinase-2	1	0.999	8	47	47	47	2	6	7	10	4	4	0	3	3	3	2	3	2	6	7	10	4	4	0	3	3	3	2	3	2	6	7	10	4	4	0	3	3	3	2	3
sp|P52799|EFNB2_HUMAN	P52799	EFNB2_HUMAN	EFNB2	333	Homo sapiens	1:Experimental evidence at protein level	Ephrin-B2	1	0.999	3	18	18	18	1	3	4	2	2	3	1	0	0	1	0	1	1	3	4	2	2	3	1	0	0	1	0	1	1	3	4	2	2	3	1	0	0	1	0	1
sp|P52815|RM12_HUMAN	P52815	RM12_HUMAN	MRPL12	198	Homo sapiens	1:Experimental evidence at protein level	39S ribosomal protein L12, mitochondrial	1	0.999	3	67	67	67	6	6	0	1	5	3	13	2	8	10	8	5	6	6	0	1	5	3	13	2	8	10	8	5	6	6	0	1	5	3	13	2	8	10	8	5
sp|P52888|THOP1_HUMAN	P52888	THOP1_HUMAN	THOP1	689	Homo sapiens	1:Experimental evidence at protein level	Thimet oligopeptidase	1	0.999	6	58	20	58	6	4	4	7	3	5	8	4	4	4	6	3	3	2	2	2	1	0	5	1	1	1	1	1	6	4	4	7	3	5	8	4	4	4	6	3
sp|P52907|CAZA1_HUMAN	P52907	CAZA1_HUMAN	CAPZA1	286	Homo sapiens	1:Experimental evidence at protein level	F-actin-capping protein subunit alpha-1	1	0.999	12	235	207	235	26	23	17	14	25	22	15	16	16	18	25	18	24	21	13	11	22	19	13	15	14	16	22	17	26	23	17	14	25	22	15	16	16	18	25	18
sp|P52926-2|HMGA2_HUMAN	P52926-2	HMGA2_HUMAN	HMGA2	106	Homo sapiens		Isoform 2 of High mobility group protein HMGI-C	1	0.999	2	28	0	28	1	1	4	0	3	2	2	1	3	2	4	5	0	0	0	0	0	0	0	0	0	0	0	0	1	1	4	0	3	2	2	1	3	2	4	5
sp|P52948-5|NUP98_HUMAN	P52948-5	NUP98_HUMAN	NUP98	1800	Homo sapiens		Isoform 5 of Nuclear pore complex protein Nup98-Nup96	1	0.999	11	50	0	50	0	1	7	4	4	3	8	5	5	4	3	6	0	0	0	0	0	0	0	0	0	0	0	0	0	1	7	4	4	3	8	5	5	4	3	6
sp|P53004|BIEA_HUMAN	P53004	BIEA_HUMAN	BLVRA	296	Homo sapiens	1:Experimental evidence at protein level	Biliverdin reductase A	1	0.999	5	10	10	10	0	1	1	1	2	3	0	0	0	0	0	2	0	1	1	1	2	3	0	0	0	0	0	2	0	1	1	1	2	3	0	0	0	0	0	2
sp|P53007|TXTP_HUMAN	P53007	TXTP_HUMAN	SLC25A1	311	Homo sapiens	1:Experimental evidence at protein level	Tricarboxylate transport protein, mitochondrial	1	0.999	3	41	41	41	5	3	5	5	7	2	1	3	3	2	2	3	5	3	5	5	7	2	1	3	3	2	2	3	5	3	5	5	7	2	1	3	3	2	2	3
sp|P53041|PPP5_HUMAN	P53041	PPP5_HUMAN	PPP5C	499	Homo sapiens	1:Experimental evidence at protein level	Serine/threonine-protein phosphatase 5	1	0.999	6	19	19	19	5	4	5	4	0	0	0	0	0	0	0	1	5	4	5	4	0	0	0	0	0	0	0	1	5	4	5	4	0	0	0	0	0	0	0	1
sp|P53365-2|ARFP2_HUMAN	P53365-2	ARFP2_HUMAN	ARFIP2	256	Homo sapiens		Isoform 2 of Arfaptin-2	0.942	0.9989	1	1	0	1	0	0	0	0	0	0	1	0	0	0	0	0	0	0	0	0	0	0	0	0	0	0	0	0	0	0	0	0	0	0	1	0	0	0	0	0
sp|P53367-2|ARFP1_HUMAN	P53367-2	ARFP1_HUMAN	ARFIP1	341	Homo sapiens		Isoform A of Arfaptin-1	1	0.999	5	67	0	67	12	6	6	4	6	5	4	5	3	6	3	7	0	0	0	0	0	0	0	0	0	0	0	0	12	6	6	4	6	5	4	5	3	6	3	7
sp|P53384-2|NUBP1_HUMAN	P53384-2	NUBP1_HUMAN	NUBP1	309	Homo sapiens		Isoform 2 of Cytosolic Fe-S cluster assembly factor NUBP1	1	0.999	3	40	0	40	3	4	1	1	3	2	2	4	6	3	4	7	0	0	0	0	0	0	0	0	0	0	0	0	3	4	1	1	3	2	2	4	6	3	4	7
sp|P53396-2|ACLY_HUMAN	P53396-2	ACLY_HUMAN	ACLY	1091	Homo sapiens		Isoform 2 of ATP-citrate synthase	1	0.999	15	185	0	185	15	15	11	18	22	16	12	15	16	13	14	18	0	0	0	0	0	0	0	0	0	0	0	0	15	15	11	18	22	16	12	15	16	13	14	18
sp|P53420|CO4A4_HUMAN	P53420	CO4A4_HUMAN	COL4A4	1690	Homo sapiens	1:Experimental evidence at protein level	Collagen alpha-4(IV) chain	0.9996	0.9974	2	3	3	3	1	0	0	0	0	0	1	0	1	0	0	0	1	0	0	0	0	0	1	0	1	0	0	0	1	0	0	0	0	0	1	0	1	0	0	0
sp|P53582|MAP11_HUMAN	P53582	MAP11_HUMAN	METAP1	386	Homo sapiens	1:Experimental evidence at protein level	Methionine aminopeptidase 1	1	0.999	11	88	88	88	5	2	9	5	13	7	6	9	7	6	10	9	5	2	9	5	13	7	6	9	7	6	10	9	5	2	9	5	13	7	6	9	7	6	10	9
sp|P53597|SUCA_HUMAN	P53597	SUCA_HUMAN	SUCLG1	346	Homo sapiens	1:Experimental evidence at protein level	Succinate--CoA ligase [ADP/GDP-forming] subunit alpha, mitochondrial	1	0.999	5	74	74	74	12	8	3	4	7	5	6	5	7	3	8	6	12	8	3	4	7	5	6	5	7	3	8	6	12	8	3	4	7	5	6	5	7	3	8	6
sp|P53602|MVD1_HUMAN	P53602	MVD1_HUMAN	MVD	400	Homo sapiens	1:Experimental evidence at protein level	Diphosphomevalonate decarboxylase	1	0.999	3	26	26	26	3	2	1	1	2	4	1	0	2	5	4	1	3	2	1	1	2	4	1	0	2	5	4	1	3	2	1	1	2	4	1	0	2	5	4	1
sp|P53618|COPB_HUMAN	P53618	COPB_HUMAN	COPB1	953	Homo sapiens	1:Experimental evidence at protein level	Coatomer subunit beta	1	0.999	27	462	462	462	38	39	41	35	47	50	25	31	42	45	37	32	38	39	41	35	47	50	25	31	42	45	37	32	38	39	41	35	47	50	25	31	42	45	37	32
sp|P53621-2|COPA_HUMAN	P53621-2	COPA_HUMAN	COPA	1233	Homo sapiens		Isoform 2 of Coatomer subunit alpha	1	0.999	33	428	0	428	38	42	38	33	38	41	34	26	31	38	33	36	0	0	0	0	0	0	0	0	0	0	0	0	38	42	38	33	38	41	34	26	31	38	33	36
sp|P53634|CATC_HUMAN	P53634	CATC_HUMAN	CTSC	463	Homo sapiens	1:Experimental evidence at protein level	Dipeptidyl peptidase 1	1	0.999	5	74	74	74	1	1	17	14	4	10	4	4	4	5	5	5	1	1	17	14	4	10	4	4	4	5	5	5	1	1	17	14	4	10	4	4	4	5	5	5
sp|P53671|LIMK2_HUMAN	P53671	LIMK2_HUMAN	LIMK2	638	Homo sapiens	1:Experimental evidence at protein level	LIM domain kinase 2	0.915	0.9983	1	1	1	1	0	0	0	0	0	0	0	0	0	0	1	0	0	0	0	0	0	0	0	0	0	0	1	0	0	0	0	0	0	0	0	0	0	0	1	0
sp|P53680|AP2S1_HUMAN	P53680	AP2S1_HUMAN	AP2S1	142	Homo sapiens	1:Experimental evidence at protein level	AP-2 complex subunit sigma	1	0.999	2	18	12	18	2	3	2	0	3	1	0	0	2	1	2	2	2	2	2	0	2	0	0	0	1	1	1	1	2	3	2	0	3	1	0	0	2	1	2	2
sp|P53701|CCHL_HUMAN	P53701	CCHL_HUMAN	HCCS	268	Homo sapiens	1:Experimental evidence at protein level	Holocytochrome c-type synthase	1	0.999	5	29	29	29	1	4	1	1	6	6	1	3	2	2	1	1	1	4	1	1	6	6	1	3	2	2	1	1	1	4	1	1	6	6	1	3	2	2	1	1
sp|P53801|PTTG_HUMAN	P53801	PTTG_HUMAN	PTTG1IP	180	Homo sapiens	1:Experimental evidence at protein level	Pituitary tumor-transforming gene 1 protein-interacting protein	0.9469	0.999	1	6	6	6	4	2	0	0	0	0	0	0	0	0	0	0	4	2	0	0	0	0	0	0	0	0	0	0	4	2	0	0	0	0	0	0	0	0	0	0
sp|P53816|PLAT3_HUMAN	P53816	PLAT3_HUMAN	PLAAT3	162	Homo sapiens	1:Experimental evidence at protein level	Phospholipase A and acyltransferase 3	0.9999	0.9982	2	4	4	4	0	0	0	0	1	0	0	0	1	0	1	1	0	0	0	0	1	0	0	0	1	0	1	1	0	0	0	0	1	0	0	0	1	0	1	1
sp|P53985|MOT1_HUMAN	P53985	MOT1_HUMAN	SLC16A1	500	Homo sapiens	1:Experimental evidence at protein level	Monocarboxylate transporter 1	1	0.999	3	49	44	49	4	3	2	4	4	5	2	6	5	5	4	5	4	3	2	4	3	4	1	6	4	4	4	5	4	3	2	4	4	5	2	6	5	5	4	5
sp|P53990-2|IST1_HUMAN	P53990-2	IST1_HUMAN	IST1	335	Homo sapiens		Isoform 2 of IST1 homolog	1	0.999	6	60	0	60	6	4	5	7	9	4	2	4	4	5	6	4	0	0	0	0	0	0	0	0	0	0	0	0	6	4	5	7	9	4	2	4	4	5	6	4
sp|P53992|SC24C_HUMAN	P53992	SC24C_HUMAN	SEC24C	1094	Homo sapiens	1:Experimental evidence at protein level	Protein transport protein Sec24C	1	0.999	8	59	45	59	8	8	4	3	3	2	3	4	4	6	8	6	7	8	3	2	2	2	3	1	2	4	6	5	8	8	4	3	3	2	3	4	4	6	8	6
sp|P53999|TCP4_HUMAN	P53999	TCP4_HUMAN	SUB1	127	Homo sapiens	1:Experimental evidence at protein level	Activated RNA polymerase II transcriptional coactivator p15	1	0.999	5	80	80	80	7	9	4	4	9	5	3	5	5	10	9	10	7	9	4	4	9	5	3	5	5	10	9	10	7	9	4	4	9	5	3	5	5	10	9	10
sp|P54105|ICLN_HUMAN	P54105	ICLN_HUMAN	CLNS1A	237	Homo sapiens	1:Experimental evidence at protein level	Methylosome subunit pICln	0.9469	0.999	1	7	7	7	2	2	0	0	1	2	0	0	0	0	0	0	2	2	0	0	1	2	0	0	0	0	0	0	2	2	0	0	1	2	0	0	0	0	0	0
sp|P54136|SYRC_HUMAN	P54136	SYRC_HUMAN	RARS1	660	Homo sapiens	1:Experimental evidence at protein level	Arginine--tRNA ligase, cytoplasmic	1	0.999	17	178	21	178	13	21	9	9	20	21	9	11	14	16	15	20	1	3	0	0	2	3	2	1	1	3	1	4	13	21	9	9	20	21	9	11	14	16	15	20
sp|P54252-1|ATX3_HUMAN	P54252-1	ATX3_HUMAN	ATXN3	364	Homo sapiens		Isoform 1 of Ataxin-3	1	0.999	4	8	0	8	2	0	0	0	0	0	0	1	0	3	0	2	0	0	0	0	0	0	0	0	0	0	0	0	2	0	0	0	0	0	0	1	0	3	0	2
sp|P54577|SYYC_HUMAN	P54577	SYYC_HUMAN	YARS1	528	Homo sapiens	1:Experimental evidence at protein level	Tyrosine--tRNA ligase, cytoplasmic	1	0.999	18	246	246	246	20	25	16	15	33	27	12	15	15	21	23	24	20	25	16	15	33	27	12	15	15	21	23	24	20	25	16	15	33	27	12	15	15	21	23	24
sp|P54578-2|UBP14_HUMAN	P54578-2	UBP14_HUMAN	USP14	459	Homo sapiens		Isoform 2 of Ubiquitin carboxyl-terminal hydrolase 14	1	0.999	11	84	0	84	6	6	10	9	8	5	7	7	8	8	3	7	0	0	0	0	0	0	0	0	0	0	0	0	6	6	10	9	8	5	7	7	8	8	3	7
sp|P54619-2|AAKG1_HUMAN	P54619-2	AAKG1_HUMAN	PRKAG1	299	Homo sapiens		Isoform 2 of 5'-AMP-activated protein kinase subunit gamma-1	1	0.999	3	42	0	42	4	5	4	2	5	3	3	4	4	4	2	2	0	0	0	0	0	0	0	0	0	0	0	0	4	5	4	2	5	3	3	4	4	4	2	2
sp|P54709-2|AT1B3_HUMAN	P54709-2	AT1B3_HUMAN	ATP1B3	193	Homo sapiens		Isoform 2 of Sodium/potassium-transporting ATPase subunit beta-3	0.9469	0.999	1	14	0	14	1	2	0	0	1	3	0	2	1	2	1	1	0	0	0	0	0	0	0	0	0	0	0	0	1	2	0	0	1	3	0	2	1	2	1	1
sp|P54725-2|RD23A_HUMAN	P54725-2	RD23A_HUMAN	RAD23A	308	Homo sapiens		Isoform 2 of UV excision repair protein RAD23 homolog A	1	0.999	1	5	0	5	0	0	2	0	2	0	0	0	0	1	0	0	0	0	0	0	0	0	0	0	0	0	0	0	0	0	2	0	2	0	0	0	0	1	0	0
sp|P54727|RD23B_HUMAN	P54727	RD23B_HUMAN	RAD23B	409	Homo sapiens	1:Experimental evidence at protein level	UV excision repair protein RAD23 homolog B	1	0.999	4	52	17	52	4	6	5	3	7	3	1	4	1	3	5	10	1	2	2	1	2	1	1	1	1	2	2	1	4	6	5	3	7	3	1	4	1	3	5	10
sp|P54803-3|GALC_HUMAN	P54803-3	GALC_HUMAN	GALC	662	Homo sapiens		Isoform 3 of Galactocerebrosidase	0.9468	0.999	1	2	0	2	0	0	1	1	0	0	0	0	0	0	0	0	0	0	0	0	0	0	0	0	0	0	0	0	0	0	1	1	0	0	0	0	0	0	0	0
sp|P54819-2|KAD2_HUMAN	P54819-2	KAD2_HUMAN	AK2	232	Homo sapiens		Isoform 2 of Adenylate kinase 2, mitochondrial	1	0.999	6	162	0	162	12	18	9	12	19	13	16	10	14	9	14	16	0	0	0	0	0	0	0	0	0	0	0	0	12	18	9	12	19	13	16	10	14	9	14	16
sp|P54868|HMCS2_HUMAN	P54868	HMCS2_HUMAN	HMGCS2	508	Homo sapiens	1:Experimental evidence at protein level	Hydroxymethylglutaryl-CoA synthase, mitochondrial	1	0.999	11	49	0	49	11	11	3	1	12	11	0	0	0	0	0	0	0	0	0	0	0	0	0	0	0	0	0	0	11	11	3	1	12	11	0	0	0	0	0	0
sp|P54886-2|P5CS_HUMAN	P54886-2	P5CS_HUMAN	ALDH18A1	793	Homo sapiens		Isoform Short of Delta-1-pyrroline-5-carboxylate synthase	1	0.999	16	251	0	251	26	22	30	31	30	19	12	17	11	14	21	18	0	0	0	0	0	0	0	0	0	0	0	0	26	22	30	31	30	19	12	17	11	14	21	18
sp|P54920|SNAA_HUMAN	P54920	SNAA_HUMAN	NAPA	295	Homo sapiens	1:Experimental evidence at protein level	Alpha-soluble NSF attachment protein	1	0.999	5	53	35	53	8	4	5	2	6	3	4	5	3	4	4	5	7	3	1	1	4	2	3	3	2	3	2	4	8	4	5	2	6	3	4	5	3	4	4	5
sp|P55010|IF5_HUMAN	P55010	IF5_HUMAN	EIF5	431	Homo sapiens	1:Experimental evidence at protein level	Eukaryotic translation initiation factor 5	1	0.999	10	133	133	133	14	14	7	5	9	16	11	7	13	12	12	13	14	14	7	5	9	16	11	7	13	12	12	13	14	14	7	5	9	16	11	7	13	12	12	13
sp|P55011-3|S12A2_HUMAN	P55011-3	S12A2_HUMAN	SLC12A2	1196	Homo sapiens		Isoform 2 of Solute carrier family 12 member 2	1	0.999	15	195	0	195	11	14	6	7	16	8	19	19	18	26	23	28	0	0	0	0	0	0	0	0	0	0	0	0	11	14	6	7	16	8	19	19	18	26	23	28
sp|P55036|PSMD4_HUMAN	P55036	PSMD4_HUMAN	PSMD4	377	Homo sapiens	1:Experimental evidence at protein level	26S proteasome non-ATPase regulatory subunit 4	1	0.999	3	37	5	37	5	3	5	2	1	3	3	3	2	2	4	4	1	1	0	0	0	0	0	0	0	0	1	2	5	3	5	2	1	3	3	3	2	2	4	4
sp|P55039|DRG2_HUMAN	P55039	DRG2_HUMAN	DRG2	364	Homo sapiens	1:Experimental evidence at protein level	Developmentally-regulated GTP-binding protein 2	1	0.999	3	7	7	7	0	0	3	3	1	0	0	0	0	0	0	0	0	0	3	3	1	0	0	0	0	0	0	0	0	0	3	3	1	0	0	0	0	0	0	0
sp|P55060-3|XPO2_HUMAN	P55060-3	XPO2_HUMAN	CSE1L	945	Homo sapiens		Isoform 3 of Exportin-2	1	0.999	17	161	0	161	14	14	17	12	20	14	8	10	12	16	11	13	0	0	0	0	0	0	0	0	0	0	0	0	14	14	17	12	20	14	8	10	12	16	11	13
sp|P55072|TERA_HUMAN	P55072	TERA_HUMAN	VCP	806	Homo sapiens	1:Experimental evidence at protein level	Transitional endoplasmic reticulum ATPase	1	0.999	34	565	560	565	59	62	32	38	53	48	33	30	53	42	62	53	58	61	32	38	52	48	33	30	53	42	62	51	59	62	32	38	53	48	33	30	53	42	62	53
sp|P55081|MFAP1_HUMAN	P55081	MFAP1_HUMAN	MFAP1	439	Homo sapiens	1:Experimental evidence at protein level	Microfibrillar-associated protein 1	0.9469	0.999	1	4	4	4	1	1	0	0	2	0	0	0	0	0	0	0	1	1	0	0	2	0	0	0	0	0	0	0	1	1	0	0	2	0	0	0	0	0	0	0
sp|P55084-2|ECHB_HUMAN	P55084-2	ECHB_HUMAN	HADHB	452	Homo sapiens		Isoform 2 of Trifunctional enzyme subunit beta, mitochondrial	1	0.999	9	153	0	153	15	16	5	8	16	17	8	10	11	16	14	17	0	0	0	0	0	0	0	0	0	0	0	0	15	16	5	8	16	17	8	10	11	16	14	17
sp|P55145|MANF_HUMAN	P55145	MANF_HUMAN	MANF	182	Homo sapiens	1:Experimental evidence at protein level	Mesencephalic astrocyte-derived neurotrophic factor	1	0.999	6	92	92	92	6	9	4	5	9	6	6	9	9	12	8	9	6	9	4	5	9	6	6	9	9	12	8	9	6	9	4	5	9	6	6	9	9	12	8	9
sp|P55196-5|AFAD_HUMAN	P55196-5	AFAD_HUMAN	AFDN	1834	Homo sapiens		Isoform 5 of Afadin	1	0.999	12	47	0	47	8	5	2	2	9	3	2	3	4	3	1	5	0	0	0	0	0	0	0	0	0	0	0	0	8	5	2	2	9	3	2	3	4	3	1	5
sp|P55209|NP1L1_HUMAN	P55209	NP1L1_HUMAN	NAP1L1	391	Homo sapiens	1:Experimental evidence at protein level	Nucleosome assembly protein 1-like 1	1	0.999	12	206	0	206	11	10	5	6	10	10	24	23	33	24	26	24	0	0	0	0	0	0	0	0	0	0	0	0	11	10	5	6	10	10	24	23	33	24	26	24
sp|P55212|CASP6_HUMAN	P55212	CASP6_HUMAN	CASP6	293	Homo sapiens	1:Experimental evidence at protein level	Caspase-6	1	0.999	8	24	20	24	0	2	2	2	3	3	1	2	5	3	1	0	0	1	2	2	1	3	1	2	4	3	1	0	0	2	2	2	3	3	1	2	5	3	1	0
sp|P55263|ADK_HUMAN	P55263	ADK_HUMAN	ADK	362	Homo sapiens	1:Experimental evidence at protein level	Adenosine kinase	1	0.999	5	43	0	43	3	4	3	2	5	2	5	4	4	2	6	3	0	0	0	0	0	0	0	0	0	0	0	0	3	4	3	2	5	2	5	4	4	2	6	3
sp|P55265-2|DSRAD_HUMAN	P55265-2	DSRAD_HUMAN	ADAR	1200	Homo sapiens		Isoform 2 of Double-stranded RNA-specific adenosine deaminase	1	0.999	11	130	0	130	13	13	6	7	12	10	6	11	17	12	10	13	0	0	0	0	0	0	0	0	0	0	0	0	13	13	6	7	12	10	6	11	17	12	10	13
sp|P55268|LAMB2_HUMAN	P55268	LAMB2_HUMAN	LAMB2	1798	Homo sapiens	1:Experimental evidence at protein level	Laminin subunit beta-2	1	0.999	6	20	19	20	2	2	1	0	4	0	2	1	1	3	1	3	2	2	1	0	3	0	2	1	1	3	1	3	2	2	1	0	4	0	2	1	1	3	1	3
sp|P55327-2|TPD52_HUMAN	P55327-2	TPD52_HUMAN	TPD52	184	Homo sapiens		Isoform 2 of Tumor protein D52	1	0.999	9	63	0	63	7	10	0	2	12	6	1	1	5	5	7	7	0	0	0	0	0	0	0	0	0	0	0	0	7	10	0	2	12	6	1	1	5	5	7	7
sp|P55735|SEC13_HUMAN	P55735	SEC13_HUMAN	SEC13	322	Homo sapiens	1:Experimental evidence at protein level	Protein SEC13 homolog	1	0.999	7	75	23	75	12	12	5	4	9	6	0	5	9	5	4	4	4	2	0	0	2	2	0	2	4	2	2	3	12	12	5	4	9	6	0	5	9	5	4	4
sp|P55769|NH2L1_HUMAN	P55769	NH2L1_HUMAN	SNU13	128	Homo sapiens	1:Experimental evidence at protein level	NHP2-like protein 1	1	0.999	4	21	21	21	1	3	1	1	1	1	1	1	4	1	4	2	1	3	1	1	1	1	1	1	4	1	4	2	1	3	1	1	1	1	1	1	4	1	4	2
sp|P55786-2|PSA_HUMAN	P55786-2	PSA_HUMAN	NPEPPS	839	Homo sapiens		Isoform 2 of Puromycin-sensitive aminopeptidase	1	0.999	16	168	0	168	16	16	12	11	18	15	12	12	14	15	10	17	0	0	0	0	0	0	0	0	0	0	0	0	16	16	12	11	18	15	12	12	14	15	10	17
sp|P55789|ALR_HUMAN	P55789	ALR_HUMAN	GFER	205	Homo sapiens	1:Experimental evidence at protein level	FAD-linked sulfhydryl oxidase ALR	0.9469	0.999	1	21	21	21	2	3	0	0	2	3	0	1	1	3	3	3	2	3	0	0	2	3	0	1	1	3	3	3	2	3	0	0	2	3	0	1	1	3	3	3
sp|P55795|HNRH2_HUMAN	P55795	HNRH2_HUMAN	HNRNPH2	449	Homo sapiens	1:Experimental evidence at protein level	Heterogeneous nuclear ribonucleoprotein H2	1	0.999	13	68	68	239	6	8	5	5	4	4	7	1	9	5	6	8	6	8	5	5	4	4	7	1	9	5	6	8	19	27	15	15	13	15	20	9	30	22	26	28
sp|P55809|SCOT1_HUMAN	P55809	SCOT1_HUMAN	OXCT1	520	Homo sapiens	1:Experimental evidence at protein level	Succinyl-CoA:3-ketoacid coenzyme A transferase 1, mitochondrial	1	0.999	5	13	9	13	0	1	0	0	1	1	2	1	2	0	3	2	0	1	0	0	1	1	1	0	1	0	2	2	0	1	0	0	1	1	2	1	2	0	3	2
sp|P55854-2|SUMO3_HUMAN	P55854-2	SUMO3_HUMAN	SUMO3	141	Homo sapiens		Isoform 2 of Small ubiquitin-related modifier 3	0.9469	0.999	1	10	0	10	1	1	0	0	1	1	1	1	1	1	1	1	0	0	0	0	0	0	0	0	0	0	0	0	1	1	0	0	1	1	1	1	1	1	1	1
sp|P55884-2|EIF3B_HUMAN	P55884-2	EIF3B_HUMAN	EIF3B	873	Homo sapiens		Isoform 2 of Eukaryotic translation initiation factor 3 subunit B	1	0.999	16	198	0	198	12	14	10	10	19	13	14	22	21	25	17	21	0	0	0	0	0	0	0	0	0	0	0	0	12	14	10	10	19	13	14	22	21	25	17	21
sp|P55957|BID_HUMAN	P55957	BID_HUMAN	BID	195	Homo sapiens	1:Experimental evidence at protein level	BH3-interacting domain death agonist	1	0.999	3	32	32	32	4	4	0	1	4	3	2	2	2	4	2	4	4	4	0	1	4	3	2	2	2	4	2	4	4	4	0	1	4	3	2	2	2	4	2	4
sp|P56134-2|ATPK_HUMAN	P56134-2	ATPK_HUMAN	ATP5MF	88	Homo sapiens		Isoform 2 of ATP synthase subunit f, mitochondrial	1	0.999	2	24	0	24	3	3	2	1	4	2	1	1	2	2	2	1	0	0	0	0	0	0	0	0	0	0	0	0	3	3	2	1	4	2	1	1	2	2	2	1
sp|P56181-2|NDUV3_HUMAN	P56181-2	NDUV3_HUMAN	NDUFV3	473	Homo sapiens		Isoform 2 of NADH dehydrogenase [ubiquinone] flavoprotein 3, mitochondrial	1	0.999	5	16	16	16	1	7	2	0	2	2	0	0	2	0	0	0	1	7	2	0	2	2	0	0	2	0	0	0	1	7	2	0	2	2	0	0	2	0	0	0
sp|P56192|SYMC_HUMAN	P56192	SYMC_HUMAN	MARS1	900	Homo sapiens	1:Experimental evidence at protein level	Methionine--tRNA ligase, cytoplasmic	1	0.999	18	130	45	130	13	13	12	12	13	11	8	10	9	7	10	12	4	5	4	5	5	5	4	3	2	2	3	3	13	13	12	12	13	11	8	10	9	7	10	12
sp|P56199|ITA1_HUMAN	P56199	ITA1_HUMAN	ITGA1	1179	Homo sapiens	1:Experimental evidence at protein level	Integrin alpha-1	1	0.999	2	4	4	4	0	2	1	0	1	0	0	0	0	0	0	0	0	2	1	0	1	0	0	0	0	0	0	0	0	2	1	0	1	0	0	0	0	0	0	0
sp|P56211|ARP19_HUMAN	P56211	ARP19_HUMAN	ARPP19	112	Homo sapiens	1:Experimental evidence at protein level	cAMP-regulated phosphoprotein 19	1	0.999	4	70	55	70	12	7	3	4	5	5	1	7	7	6	6	7	9	5	2	4	5	5	1	4	6	4	5	5	12	7	3	4	5	5	1	7	7	6	6	7
sp|P56277|CMC4_HUMAN	P56277	CMC4_HUMAN	CMC4	68	Homo sapiens	1:Experimental evidence at protein level	Cx9C motif-containing protein 4	0.9211	0.9985	1	1	1	1	0	0	1	0	0	0	0	0	0	0	0	0	0	0	1	0	0	0	0	0	0	0	0	0	0	0	1	0	0	0	0	0	0	0	0	0
sp|P56385|ATP5I_HUMAN	P56385	ATP5I_HUMAN	ATP5ME	69	Homo sapiens	1:Experimental evidence at protein level	ATP synthase subunit e, mitochondrial	0.9999	0.9988	2	11	11	11	1	1	0	1	2	1	0	0	1	1	1	2	1	1	0	1	2	1	0	0	1	1	1	2	1	1	0	1	2	1	0	0	1	1	1	2
sp|P56470|LEG4_HUMAN	P56470	LEG4_HUMAN	LGALS4	323	Homo sapiens	1:Experimental evidence at protein level	Galectin-4	1	0.999	13	409	409	409	31	33	93	72	56	44	10	16	13	14	14	13	31	33	93	72	56	44	10	16	13	14	14	13	31	33	93	72	56	44	10	16	13	14	14	13
sp|P56524|HDAC4_HUMAN	P56524	HDAC4_HUMAN	HDAC4	1084	Homo sapiens	1:Experimental evidence at protein level	Histone deacetylase 4	1	0.9985	2	5	3	5	0	0	0	0	0	0	0	1	1	2	0	1	0	0	0	0	0	0	0	0	1	1	0	1	0	0	0	0	0	0	0	1	1	2	0	1
sp|P56537|IF6_HUMAN	P56537	IF6_HUMAN	EIF6	245	Homo sapiens	1:Experimental evidence at protein level	Eukaryotic translation initiation factor 6	1	0.999	6	142	45	142	18	15	6	4	27	17	8	8	6	9	13	11	5	3	6	4	4	3	2	5	2	4	3	4	18	15	6	4	27	17	8	8	6	9	13	11
sp|P56545-2|CTBP2_HUMAN	P56545-2	CTBP2_HUMAN	CTBP2	985	Homo sapiens		Isoform 2 of C-terminal-binding protein 2	1	0.999	4	55	0	55	3	4	2	2	3	3	6	10	6	9	3	4	0	0	0	0	0	0	0	0	0	0	0	0	3	4	2	2	3	3	6	10	6	9	3	4
sp|P56556|NDUA6_HUMAN	P56556	NDUA6_HUMAN	NDUFA6	128	Homo sapiens	1:Experimental evidence at protein level	NADH dehydrogenase [ubiquinone] 1 alpha subcomplex subunit 6	1	0.999	2	28	28	28	4	4	3	3	3	1	1	2	1	3	2	1	4	4	3	3	3	1	1	2	1	3	2	1	4	4	3	3	3	1	1	2	1	3	2	1
sp|P56945-2|BCAR1_HUMAN	P56945-2	BCAR1_HUMAN	BCAR1	888	Homo sapiens		Isoform 2 of Breast cancer anti-estrogen resistance protein 1	1	0.999	3	18	0	18	3	1	3	3	2	2	0	1	1	1	1	0	0	0	0	0	0	0	0	0	0	0	0	0	3	1	3	3	2	2	0	1	1	1	1	0
sp|P57081-2|WDR4_HUMAN	P57081-2	WDR4_HUMAN	WDR4	411	Homo sapiens		Isoform 2 of tRNA (guanine-N(7)-)-methyltransferase non-catalytic subunit WDR4	1	0.999	2	6	0	6	0	0	0	0	1	0	2	0	1	2	0	0	0	0	0	0	0	0	0	0	0	0	0	0	0	0	0	0	1	0	2	0	1	2	0	0
sp|P57088|TMM33_HUMAN	P57088	TMM33_HUMAN	TMEM33	247	Homo sapiens	1:Experimental evidence at protein level	Transmembrane protein 33	1	0.999	1	2	2	2	0	0	0	0	0	0	0	0	0	0	1	1	0	0	0	0	0	0	0	0	0	0	1	1	0	0	0	0	0	0	0	0	0	0	1	1
sp|P57105|SYJ2B_HUMAN	P57105	SYJ2B_HUMAN	SYNJ2BP	145	Homo sapiens	1:Experimental evidence at protein level	Synaptojanin-2-binding protein	1	0.999	2	19	19	19	2	3	1	1	2	2	2	1	2	1	1	1	2	3	1	1	2	2	2	1	2	1	1	1	2	3	1	1	2	2	2	1	2	1	1	1
sp|P57735|RAB25_HUMAN	P57735	RAB25_HUMAN	RAB25	213	Homo sapiens	1:Experimental evidence at protein level	Ras-related protein Rab-25	1	0.999	3	25	25	25	4	4	4	2	1	1	2	1	2	1	1	2	4	4	4	2	1	1	2	1	2	1	1	2	4	4	4	2	1	1	2	1	2	1	1	2
sp|P57737-2|CORO7_HUMAN	P57737-2	CORO7_HUMAN	CORO7	840	Homo sapiens		Isoform 2 of Coronin-7	0.944	0.9989	1	16	0	16	1	3	1	1	0	3	0	2	1	3	1	0	0	0	0	0	0	0	0	0	0	0	0	0	1	3	1	1	0	3	0	2	1	3	1	0
sp|P57740-2|NU107_HUMAN	P57740-2	NU107_HUMAN	NUP107	896	Homo sapiens		Isoform 2 of Nuclear pore complex protein Nup107	1	0.999	2	10	0	10	1	2	2	1	1	0	0	0	2	0	0	1	0	0	0	0	0	0	0	0	0	0	0	0	1	2	2	1	1	0	0	0	2	0	0	1
sp|P57764|GSDMD_HUMAN	P57764	GSDMD_HUMAN	GSDMD	484	Homo sapiens	1:Experimental evidence at protein level	Gasdermin-D	0.9455	0.999	1	1	1	1	0	0	1	0	0	0	0	0	0	0	0	0	0	0	1	0	0	0	0	0	0	0	0	0	0	0	1	0	0	0	0	0	0	0	0	0
sp|P57772-2|SELB_HUMAN	P57772-2	SELB_HUMAN	EEFSEC	569	Homo sapiens		Isoform 2 of Selenocysteine-specific elongation factor	1	0.999	2	5	0	5	1	0	2	1	0	1	0	0	0	0	0	0	0	0	0	0	0	0	0	0	0	0	0	0	1	0	2	1	0	1	0	0	0	0	0	0
sp|P58107|EPIPL_HUMAN	P58107	EPIPL_HUMAN	EPPK1	5088	Homo sapiens	1:Experimental evidence at protein level	Epiplakin	1	0.999	26	255	171	255	25	28	22	22	29	28	19	17	18	17	16	14	19	19	13	14	20	21	13	12	11	12	10	7	25	28	22	22	29	28	19	17	18	17	16	14
sp|P58335-2|ANTR2_HUMAN	P58335-2	ANTR2_HUMAN	ANTXR2	386	Homo sapiens		Isoform 2 of Anthrax toxin receptor 2	0.9469	0.999	1	13	0	13	2	1	2	0	1	1	1	1	1	1	1	1	0	0	0	0	0	0	0	0	0	0	0	0	2	1	2	0	1	1	1	1	1	1	1	1
sp|P58546|MTPN_HUMAN	P58546	MTPN_HUMAN	MTPN	118	Homo sapiens	1:Experimental evidence at protein level	Myotrophin	1	0.999	4	202	202	202	10	10	20	30	16	15	13	18	19	18	16	17	10	10	20	30	16	15	13	18	19	18	16	17	10	10	20	30	16	15	13	18	19	18	16	17
sp|P59998|ARPC4_HUMAN	P59998	ARPC4_HUMAN	ARPC4	168	Homo sapiens	1:Experimental evidence at protein level	Actin-related protein 2/3 complex subunit 4	1	0.999	6	91	0	91	6	7	11	11	7	6	5	8	7	7	7	9	0	0	0	0	0	0	0	0	0	0	0	0	6	7	11	11	7	6	5	8	7	7	7	9
sp|P60002|ELOF1_HUMAN	P60002	ELOF1_HUMAN	ELOF1	83	Homo sapiens	1:Experimental evidence at protein level	Transcription elongation factor 1 homolog	0.9469	0.999	1	16	16	16	0	0	0	0	0	1	2	0	5	2	2	4	0	0	0	0	0	1	2	0	5	2	2	4	0	0	0	0	0	1	2	0	5	2	2	4
sp|P60033|CD81_HUMAN	P60033	CD81_HUMAN	CD81	236	Homo sapiens	1:Experimental evidence at protein level	CD81 antigen	1	0.999	2	7	7	7	4	2	0	0	1	0	0	0	0	0	0	0	4	2	0	0	1	0	0	0	0	0	0	0	4	2	0	0	1	0	0	0	0	0	0	0
sp|P60059|SC61G_HUMAN	P60059	SC61G_HUMAN	SEC61G	68	Homo sapiens	1:Experimental evidence at protein level	Protein transport protein Sec61 subunit gamma	0.9469	0.999	1	1	1	1	0	1	0	0	0	0	0	0	0	0	0	0	0	1	0	0	0	0	0	0	0	0	0	0	0	1	0	0	0	0	0	0	0	0	0	0
sp|P60174-3|TPIS_HUMAN	P60174-3	TPIS_HUMAN	TPI1	286	Homo sapiens		Isoform 2 of Triosephosphate isomerase	1	0.999	9	217	0	217	26	21	10	19	40	25	10	8	15	11	17	15	0	0	0	0	0	0	0	0	0	0	0	0	26	21	10	19	40	25	10	8	15	11	17	15
sp|P60228|EIF3E_HUMAN	P60228	EIF3E_HUMAN	EIF3E	445	Homo sapiens	1:Experimental evidence at protein level	Eukaryotic translation initiation factor 3 subunit E	1	0.999	6	39	39	39	5	3	2	0	4	2	3	3	3	5	4	5	5	3	2	0	4	2	3	3	3	5	4	5	5	3	2	0	4	2	3	3	3	5	4	5
sp|P60468|SC61B_HUMAN	P60468	SC61B_HUMAN	SEC61B	96	Homo sapiens	1:Experimental evidence at protein level	Protein transport protein Sec61 subunit beta	0.9469	0.999	1	30	30	30	2	2	2	2	2	2	2	3	3	3	4	3	2	2	2	2	2	2	2	3	3	3	4	3	2	2	2	2	2	2	2	3	3	3	4	3
sp|P60510|PP4C_HUMAN	P60510	PP4C_HUMAN	PPP4C	307	Homo sapiens	1:Experimental evidence at protein level	Serine/threonine-protein phosphatase 4 catalytic subunit	1	0.999	5	5	5	10	1	0	0	0	1	0	1	0	1	0	1	0	1	0	0	0	1	0	1	0	1	0	1	0	1	3	1	1	1	0	1	0	1	0	1	0
sp|P60602-2|ROMO1_HUMAN	P60602-2	ROMO1_HUMAN	ROMO1	59	Homo sapiens		Isoform 2 of Reactive oxygen species modulator 1	0.9469	0.999	1	18	0	18	2	3	0	0	1	2	2	2	1	2	2	1	0	0	0	0	0	0	0	0	0	0	0	0	2	3	0	0	1	2	2	2	1	2	2	1
sp|P60660-2|MYL6_HUMAN	P60660-2	MYL6_HUMAN	MYL6	151	Homo sapiens		Isoform Smooth muscle of Myosin light polypeptide 6	1	0.999	9	372	16	372	31	38	28	32	35	36	31	25	27	23	33	33	1	0	4	7	0	0	0	1	0	1	1	1	31	38	28	32	35	36	31	25	27	23	33	33
sp|P60709|ACTB_HUMAN	P60709	ACTB_HUMAN	ACTB	375	Homo sapiens	1:Experimental evidence at protein level	Actin, cytoplasmic 1	1	0.999	28	7134	428	7134	611	668	562	263	844	633	575	509	595	624	607	643	38	45	24	0	92	47	38	29	32	27	29	27	611	668	562	263	844	633	575	509	595	624	607	643
sp|P60842|IF4A1_HUMAN	P60842	IF4A1_HUMAN	EIF4A1	406	Homo sapiens	1:Experimental evidence at protein level	Eukaryotic initiation factor 4A-I	1	0.999	17	403	89	403	24	31	31	26	34	34	36	29	35	38	46	39	7	6	8	7	8	9	7	8	7	7	8	7	24	31	31	26	34	34	36	29	35	38	46	39
sp|P60866-2|RS20_HUMAN	P60866-2	RS20_HUMAN	RPS20	142	Homo sapiens		Isoform 2 of 40S ribosomal protein S20	1	0.999	3	40	0	40	3	4	4	2	5	2	2	3	3	3	5	4	0	0	0	0	0	0	0	0	0	0	0	0	3	4	4	2	5	2	2	3	3	3	5	4
sp|P60891|PRPS1_HUMAN	P60891	PRPS1_HUMAN	PRPS1	318	Homo sapiens	1:Experimental evidence at protein level	Ribose-phosphate pyrophosphokinase 1	0.9996	0.999	4	14	0	66	1	1	1	2	1	1	1	1	1	1	1	2	0	0	0	0	0	0	0	0	0	0	0	0	9	6	1	2	4	7	4	4	6	6	8	9
sp|P60900|PSA6_HUMAN	P60900	PSA6_HUMAN	PSMA6	246	Homo sapiens	1:Experimental evidence at protein level	Proteasome subunit alpha type-6	1	0.999	6	56	11	56	4	7	7	5	5	7	4	3	3	3	4	4	1	2	2	0	2	4	0	0	0	0	0	0	4	7	7	5	5	7	4	3	3	3	4	4
sp|P60903|S10AA_HUMAN	P60903	S10AA_HUMAN	S100A10	97	Homo sapiens	1:Experimental evidence at protein level	Protein S100-A10	1	0.999	3	1001	1001	1001	51	49	111	108	52	84	63	77	93	93	106	114	51	49	111	108	52	84	63	77	93	93	106	114	51	49	111	108	52	84	63	77	93	93	106	114
sp|P60953|CDC42_HUMAN	P60953	CDC42_HUMAN	CDC42	191	Homo sapiens	1:Experimental evidence at protein level	Cell division control protein 42 homolog	1	0.999	3	84	55	84	8	10	1	1	7	9	6	5	10	9	9	9	4	8	0	0	3	5	5	3	7	7	6	7	8	10	1	1	7	9	6	5	10	9	9	9
sp|P60981-2|DEST_HUMAN	P60981-2	DEST_HUMAN	DSTN	148	Homo sapiens		Isoform 2 of Destrin	1	0.999	10	165	0	165	10	7	8	8	9	8	14	17	18	18	23	25	0	0	0	0	0	0	0	0	0	0	0	0	10	7	8	8	9	8	14	17	18	18	23	25
sp|P60983|GMFB_HUMAN	P60983	GMFB_HUMAN	GMFB	142	Homo sapiens	1:Experimental evidence at protein level	Glia maturation factor beta	1	0.999	2	23	23	23	2	2	0	0	4	3	1	4	1	3	1	2	2	2	0	0	4	3	1	4	1	3	1	2	2	2	0	0	4	3	1	4	1	3	1	2
sp|P61006|RAB8A_HUMAN	P61006	RAB8A_HUMAN	RAB8A	207	Homo sapiens	1:Experimental evidence at protein level	Ras-related protein Rab-8A	1	0.999	3	33	18	33	3	2	2	3	5	3	3	2	2	3	2	3	2	1	2	2	3	2	1	1	1	1	1	1	3	2	2	3	5	3	3	2	2	3	2	3
sp|P61011|SRP54_HUMAN	P61011	SRP54_HUMAN	SRP54	504	Homo sapiens	1:Experimental evidence at protein level	Signal recognition particle subunit SRP54	1	0.999	7	29	13	29	3	4	1	1	10	2	1	1	1	2	0	3	2	0	0	0	2	2	1	0	1	2	0	3	3	4	1	1	10	2	1	1	1	2	0	3
sp|P61018-2|RAB4B_HUMAN	P61018-2	RAB4B_HUMAN	RAB4B	248	Homo sapiens		Isoform 2 of Ras-related protein Rab-4B	0.8352	0.9965	1	3	0	3	0	0	0	0	0	0	0	1	0	0	2	0	0	0	0	0	0	0	0	0	0	0	0	0	0	0	0	0	0	0	0	1	0	0	2	0
sp|P61019|RAB2A_HUMAN	P61019	RAB2A_HUMAN	RAB2A	212	Homo sapiens	1:Experimental evidence at protein level	Ras-related protein Rab-2A	1	0.999	6	53	0	53	4	6	6	5	6	6	2	2	4	4	4	4	0	0	0	0	0	0	0	0	0	0	0	0	4	6	6	5	6	6	2	2	4	4	4	4
sp|P61020|RAB5B_HUMAN	P61020	RAB5B_HUMAN	RAB5B	215	Homo sapiens	1:Experimental evidence at protein level	Ras-related protein Rab-5B	1	0.999	4	24	6	24	5	3	2	2	1	1	1	1	0	5	1	2	4	2	0	0	0	0	0	0	0	0	0	0	5	3	2	2	1	1	1	1	0	5	1	2
sp|P61026|RAB10_HUMAN	P61026	RAB10_HUMAN	RAB10	200	Homo sapiens	1:Experimental evidence at protein level	Ras-related protein Rab-10	1	0.999	5	52	52	52	4	3	4	6	4	6	6	3	3	3	5	5	4	3	4	6	4	6	6	3	3	3	5	5	4	3	4	6	4	6	6	3	3	3	5	5
sp|P61086|UBE2K_HUMAN	P61086	UBE2K_HUMAN	UBE2K	200	Homo sapiens	1:Experimental evidence at protein level	Ubiquitin-conjugating enzyme E2 K	1	0.999	3	36	0	36	4	2	1	3	2	3	4	4	4	3	2	4	0	0	0	0	0	0	0	0	0	0	0	0	4	2	1	3	2	3	4	4	4	3	2	4
sp|P61088|UBE2N_HUMAN	P61088	UBE2N_HUMAN	UBE2N	152	Homo sapiens	1:Experimental evidence at protein level	Ubiquitin-conjugating enzyme E2 N	1	0.999	5	62	50	62	11	8	1	0	7	5	2	1	7	5	11	4	9	5	1	0	4	5	2	1	6	4	10	3	11	8	1	0	7	5	2	1	7	5	11	4
sp|P61106|RAB14_HUMAN	P61106	RAB14_HUMAN	RAB14	215	Homo sapiens	1:Experimental evidence at protein level	Ras-related protein Rab-14	1	0.999	7	129	129	129	11	13	9	8	13	15	7	10	10	9	13	11	11	13	9	8	13	15	7	10	10	9	13	11	11	13	9	8	13	15	7	10	10	9	13	11
sp|P61158|ARP3_HUMAN	P61158	ARP3_HUMAN	ACTR3	418	Homo sapiens	1:Experimental evidence at protein level	Actin-related protein 3	1	0.999	12	460	460	460	36	37	34	35	40	46	32	28	51	44	38	39	36	37	34	35	40	46	32	28	51	44	38	39	36	37	34	35	40	46	32	28	51	44	38	39
sp|P61160-2|ARP2_HUMAN	P61160-2	ARP2_HUMAN	ACTR2	399	Homo sapiens		Isoform 2 of Actin-related protein 2	1	0.999	11	146	0	146	11	11	5	7	11	9	12	13	15	19	15	18	0	0	0	0	0	0	0	0	0	0	0	0	11	11	5	7	11	9	12	13	15	19	15	18
sp|P61163|ACTZ_HUMAN	P61163	ACTZ_HUMAN	ACTR1A	376	Homo sapiens	1:Experimental evidence at protein level	Alpha-centractin	1	0.999	9	77	46	77	6	7	4	3	13	8	5	6	5	6	6	8	4	4	4	3	5	4	4	3	3	3	4	5	6	7	4	3	13	8	5	6	5	6	6	8
sp|P61201-2|CSN2_HUMAN	P61201-2	CSN2_HUMAN	COPS2	450	Homo sapiens		Isoform 2 of COP9 signalosome complex subunit 2	1	0.999	5	25	0	25	4	2	2	2	3	1	1	2	2	3	2	1	0	0	0	0	0	0	0	0	0	0	0	0	4	2	2	2	3	1	1	2	2	3	2	1
sp|P61204|ARF3_HUMAN	P61204	ARF3_HUMAN	ARF3	181	Homo sapiens	1:Experimental evidence at protein level	ADP-ribosylation factor 3	1	0.999	6	439	0	439	29	25	53	59	34	35	26	39	32	39	36	32	0	0	0	0	0	0	0	0	0	0	0	0	29	25	53	59	34	35	26	39	32	39	36	32
sp|P61221|ABCE1_HUMAN	P61221	ABCE1_HUMAN	ABCE1	599	Homo sapiens	1:Experimental evidence at protein level	ATP-binding cassette sub-family E member 1	1	0.999	11	83	83	83	11	11	5	4	4	4	4	7	6	8	10	9	11	11	5	4	4	4	4	7	6	8	10	9	11	11	5	4	4	4	4	7	6	8	10	9
sp|P61224-3|RAP1B_HUMAN	P61224-3	RAP1B_HUMAN	RAP1B	165	Homo sapiens		Isoform 3 of Ras-related protein Rap-1b	1	0.999	5	67	0	67	4	6	3	2	9	7	5	5	6	7	7	6	0	0	0	0	0	0	0	0	0	0	0	0	4	6	3	2	9	7	5	5	6	7	7	6
sp|P61244-2|MAX_HUMAN	P61244-2	MAX_HUMAN	MAX	151	Homo sapiens		Isoform 2 of Protein max	1	0.999	2	35	0	35	2	1	0	0	3	4	3	5	2	4	4	7	0	0	0	0	0	0	0	0	0	0	0	0	2	1	0	0	3	4	3	5	2	4	4	7
sp|P61247|RS3A_HUMAN	P61247	RS3A_HUMAN	RPS3A	264	Homo sapiens	1:Experimental evidence at protein level	40S ribosomal protein S3a	1	0.999	8	163	163	163	14	15	11	10	14	19	13	11	11	11	15	19	14	15	11	10	14	19	13	11	11	11	15	19	14	15	11	10	14	19	13	11	11	11	15	19
sp|P61254|RL26_HUMAN	P61254	RL26_HUMAN	RPL26	145	Homo sapiens	1:Experimental evidence at protein level	60S ribosomal protein L26	1	0.999	6	76	35	76	8	7	3	5	9	7	5	7	6	6	6	7	3	4	0	2	6	2	1	5	3	3	2	4	8	7	3	5	9	7	5	7	6	6	6	7
sp|P61289-2|PSME3_HUMAN	P61289-2	PSME3_HUMAN	PSME3	267	Homo sapiens		Isoform 2 of Proteasome activator complex subunit 3	1	0.999	3	33	0	33	3	2	3	3	1	2	4	2	3	3	3	4	0	0	0	0	0	0	0	0	0	0	0	0	3	2	3	3	1	2	4	2	3	3	3	4
sp|P61313|RL15_HUMAN	P61313	RL15_HUMAN	RPL15	204	Homo sapiens	1:Experimental evidence at protein level	60S ribosomal protein L15	1	0.999	8	174	88	174	15	13	20	23	14	12	10	12	12	15	14	14	8	9	10	12	10	5	6	6	6	6	6	4	15	13	20	23	14	12	10	12	12	15	14	14
sp|P61326|MGN_HUMAN	P61326	MGN_HUMAN	MAGOH	146	Homo sapiens	1:Experimental evidence at protein level	Protein mago nashi homolog	1	0.999	5	94	0	94	4	3	8	7	8	7	5	14	8	10	9	11	0	0	0	0	0	0	0	0	0	0	0	0	4	3	8	7	8	7	5	14	8	10	9	11
sp|P61353|RL27_HUMAN	P61353	RL27_HUMAN	RPL27	136	Homo sapiens	1:Experimental evidence at protein level	60S ribosomal protein L27	1	0.999	5	86	86	86	6	7	10	8	12	7	4	6	5	6	7	8	6	7	10	8	12	7	4	6	5	6	7	8	6	7	10	8	12	7	4	6	5	6	7	8
sp|P61421|VA0D1_HUMAN	P61421	VA0D1_HUMAN	ATP6V0D1	351	Homo sapiens	1:Experimental evidence at protein level	V-type proton ATPase subunit d 1	0.9995	0.999	2	2	2	2	0	0	0	0	1	0	0	0	1	0	0	0	0	0	0	0	1	0	0	0	1	0	0	0	0	0	0	0	1	0	0	0	1	0	0	0
sp|P61457|PHS_HUMAN	P61457	PHS_HUMAN	PCBD1	104	Homo sapiens	1:Experimental evidence at protein level	Pterin-4-alpha-carbinolamine dehydratase	1	0.999	3	57	57	57	3	4	4	4	4	4	6	5	5	7	6	5	3	4	4	4	4	4	6	5	5	7	6	5	3	4	4	4	4	4	6	5	5	7	6	5
sp|P61513|RL37A_HUMAN	P61513	RL37A_HUMAN	RPL37A	92	Homo sapiens	1:Experimental evidence at protein level	60S ribosomal protein L37a	1	0.999	3	47	47	47	3	4	4	1	5	4	2	2	4	4	7	7	3	4	4	1	5	4	2	2	4	4	7	7	3	4	4	1	5	4	2	2	4	4	7	7
sp|P61586|RHOA_HUMAN	P61586	RHOA_HUMAN	RHOA	193	Homo sapiens	1:Experimental evidence at protein level	Transforming protein RhoA	1	0.999	6	135	56	135	18	13	12	7	13	9	9	10	11	8	14	11	9	5	4	4	4	3	5	5	5	3	6	3	18	13	12	7	13	9	9	10	11	8	14	11
sp|P61604|CH10_HUMAN	P61604	CH10_HUMAN	HSPE1	102	Homo sapiens	1:Experimental evidence at protein level	10 kDa heat shock protein, mitochondrial	1	0.999	5	230	230	230	10	13	25	26	15	13	25	22	24	18	20	19	10	13	25	26	15	13	25	22	24	18	20	19	10	13	25	26	15	13	25	22	24	18	20	19
sp|P61619|S61A1_HUMAN	P61619	S61A1_HUMAN	SEC61A1	476	Homo sapiens	1:Experimental evidence at protein level	Protein transport protein Sec61 subunit alpha isoform 1	1	0.999	4	42	23	42	3	3	3	4	5	4	2	2	5	4	4	3	1	2	1	2	4	3	1	1	2	2	2	2	3	3	3	4	5	4	2	2	5	4	4	3
sp|P61626|LYSC_HUMAN	P61626	LYSC_HUMAN	LYZ	148	Homo sapiens	1:Experimental evidence at protein level	Lysozyme C	1	0.999	6	50	50	50	6	6	2	3	14	5	0	1	3	1	5	4	6	6	2	3	14	5	0	1	3	1	5	4	6	6	2	3	14	5	0	1	3	1	5	4
sp|P61758|PFD3_HUMAN	P61758	PFD3_HUMAN	VBP1	197	Homo sapiens	1:Experimental evidence at protein level	Prefoldin subunit 3	1	0.999	3	33	13	33	2	5	0	1	5	5	4	2	4	2	2	1	1	2	0	0	3	2	1	1	2	0	1	0	2	5	0	1	5	5	4	2	4	2	2	1
sp|P61764-2|STXB1_HUMAN	P61764-2	STXB1_HUMAN	STXBP1	603	Homo sapiens		Isoform 2 of Syntaxin-binding protein 1	1	0.999	6	46	0	46	2	2	2	3	7	5	1	5	4	3	8	4	0	0	0	0	0	0	0	0	0	0	0	0	2	2	2	3	7	5	1	5	4	3	8	4
sp|P61916-2|NPC2_HUMAN	P61916-2	NPC2_HUMAN	NPC2	125	Homo sapiens		Isoform 2 of NPC intracellular cholesterol transporter 2	0.9996	0.999	2	18	0	18	3	3	0	0	3	1	2	0	2	0	2	2	0	0	0	0	0	0	0	0	0	0	0	0	3	3	0	0	3	1	2	0	2	0	2	2
sp|P61923-2|COPZ1_HUMAN	P61923-2	COPZ1_HUMAN	COPZ1	126	Homo sapiens		Isoform 2 of Coatomer subunit zeta-1	0.9469	0.999	1	9	0	9	2	1	0	0	0	0	0	0	1	1	1	3	0	0	0	0	0	0	0	0	0	0	0	0	2	1	0	0	0	0	0	0	1	1	1	3
sp|P61956-2|SUMO2_HUMAN	P61956-2	SUMO2_HUMAN	SUMO2	71	Homo sapiens		Isoform 2 of Small ubiquitin-related modifier 2	1	0.999	1	32	0	32	5	2	2	2	4	3	3	2	3	2	2	2	0	0	0	0	0	0	0	0	0	0	0	0	5	2	2	2	4	3	3	2	3	2	2	2
sp|P61962|DCAF7_HUMAN	P61962	DCAF7_HUMAN	DCAF7	342	Homo sapiens	1:Experimental evidence at protein level	DDB1- and CUL4-associated factor 7	1	0.999	2	8	8	8	0	0	0	2	1	0	1	1	0	1	1	1	0	0	0	2	1	0	1	1	0	1	1	1	0	0	0	2	1	0	1	1	0	1	1	1
sp|P61964|WDR5_HUMAN	P61964	WDR5_HUMAN	WDR5	334	Homo sapiens	1:Experimental evidence at protein level	WD repeat-containing protein 5	0.9999	0.999	2	10	10	10	1	2	0	0	1	2	0	0	1	0	1	2	1	2	0	0	1	2	0	0	1	0	1	2	1	2	0	0	1	2	0	0	1	0	1	2
sp|P61970|NTF2_HUMAN	P61970	NTF2_HUMAN	NUTF2	127	Homo sapiens	1:Experimental evidence at protein level	Nuclear transport factor 2	1	0.999	3	93	93	93	8	6	6	7	7	7	4	8	11	12	8	9	8	6	6	7	7	7	4	8	11	12	8	9	8	6	6	7	7	7	4	8	11	12	8	9
sp|P61978-3|HNRPK_HUMAN	P61978-3	HNRPK_HUMAN	HNRNPK	440	Homo sapiens		Isoform 3 of Heterogeneous nuclear ribonucleoprotein K	1	0.999	17	456	14	456	42	34	27	21	41	32	40	19	49	50	51	50	1	2	1	1	1	1	1	2	1	1	1	1	42	34	27	21	41	32	40	19	49	50	51	50
sp|P61981|1433G_HUMAN	P61981	1433G_HUMAN	YWHAG	247	Homo sapiens	1:Experimental evidence at protein level	14-3-3 protein gamma	1	0.999	12	110	110	468	19	13	4	5	14	13	10	6	8	6	7	5	19	13	4	5	14	13	10	6	8	6	7	5	55	55	17	12	59	41	42	23	48	27	58	31
sp|P62070-2|RRAS2_HUMAN	P62070-2	RRAS2_HUMAN	RRAS2	127	Homo sapiens		Isoform 2 of Ras-related protein R-Ras2	1	0.999	2	5	0	5	0	1	2	1	1	0	0	0	0	0	0	0	0	0	0	0	0	0	0	0	0	0	0	0	0	1	2	1	1	0	0	0	0	0	0	0
sp|P62072|TIM10_HUMAN	P62072	TIM10_HUMAN	TIMM10	90	Homo sapiens	1:Experimental evidence at protein level	Mitochondrial import inner membrane translocase subunit Tim10	1	0.999	2	18	18	18	1	1	1	1	1	3	1	2	1	4	1	1	1	1	1	1	1	3	1	2	1	4	1	1	1	1	1	1	1	3	1	2	1	4	1	1
sp|P62081|RS7_HUMAN	P62081	RS7_HUMAN	RPS7	194	Homo sapiens	1:Experimental evidence at protein level	40S ribosomal protein S7	1	0.999	7	150	150	150	13	16	8	4	32	11	11	6	15	10	14	10	13	16	8	4	32	11	11	6	15	10	14	10	13	16	8	4	32	11	11	6	15	10	14	10
sp|P62136|PP1A_HUMAN	P62136	PP1A_HUMAN	PPP1CA	330	Homo sapiens	1:Experimental evidence at protein level	Serine/threonine-protein phosphatase PP1-alpha catalytic subunit	1	0.999	13	12	6	248	0	0	2	1	1	2	0	1	1	1	1	2	0	0	0	0	0	1	0	1	1	1	1	1	19	18	8	7	22	23	22	25	23	29	22	30
sp|P62140|PP1B_HUMAN	P62140	PP1B_HUMAN	PPP1CB	327	Homo sapiens	1:Experimental evidence at protein level	Serine/threonine-protein phosphatase PP1-beta catalytic subunit	1	0.999	10	231	29	231	16	16	8	7	19	18	24	25	22	29	23	24	2	2	3	4	1	3	2	3	2	3	3	1	16	16	8	7	19	18	24	25	22	29	23	24
sp|P62191|PRS4_HUMAN	P62191	PRS4_HUMAN	PSMC1	440	Homo sapiens	1:Experimental evidence at protein level	26S proteasome regulatory subunit 4	1	0.999	12	145	24	145	14	14	8	7	17	10	14	5	19	12	12	13	3	3	0	1	4	2	2	0	2	2	3	2	14	14	8	7	17	10	14	5	19	12	12	13
sp|P62195-2|PRS8_HUMAN	P62195-2	PRS8_HUMAN	PSMC5	398	Homo sapiens		Isoform 2 of 26S proteasome regulatory subunit 8	1	0.999	10	108	0	108	7	11	7	6	12	13	8	8	7	8	7	14	0	0	0	0	0	0	0	0	0	0	0	0	7	11	7	6	12	13	8	8	7	8	7	14
sp|P62241|RS8_HUMAN	P62241	RS8_HUMAN	RPS8	208	Homo sapiens	1:Experimental evidence at protein level	40S ribosomal protein S8	1	0.999	7	66	66	66	7	11	2	6	4	7	2	3	2	3	8	11	7	11	2	6	4	7	2	3	2	3	8	11	7	11	2	6	4	7	2	3	2	3	8	11
sp|P62244|RS15A_HUMAN	P62244	RS15A_HUMAN	RPS15A	130	Homo sapiens	1:Experimental evidence at protein level	40S ribosomal protein S15a	1	0.999	2	94	94	94	7	5	11	10	11	7	6	7	7	7	9	7	7	5	11	10	11	7	6	7	7	7	9	7	7	5	11	10	11	7	6	7	7	7	9	7
sp|P62249|RS16_HUMAN	P62249	RS16_HUMAN	RPS16	146	Homo sapiens	1:Experimental evidence at protein level	40S ribosomal protein S16	1	0.999	5	76	76	76	6	6	3	3	7	5	13	6	8	5	7	7	6	6	3	3	7	5	13	6	8	5	7	7	6	6	3	3	7	5	13	6	8	5	7	7
sp|P62253|UB2G1_HUMAN	P62253	UB2G1_HUMAN	UBE2G1	170	Homo sapiens	1:Experimental evidence at protein level	Ubiquitin-conjugating enzyme E2 G1	0.9469	0.999	1	4	4	4	0	1	0	1	0	0	0	0	0	0	2	0	0	1	0	1	0	0	0	0	0	0	2	0	0	1	0	1	0	0	0	0	0	0	2	0
sp|P62258|1433E_HUMAN	P62258	1433E_HUMAN	YWHAE	255	Homo sapiens	1:Experimental evidence at protein level	14-3-3 protein epsilon	1	0.999	17	1527	300	1527	109	131	96	67	176	149	132	117	141	120	174	115	21	24	33	34	34	33	16	23	21	18	21	22	109	131	96	67	176	149	132	117	141	120	174	115
sp|P62263|RS14_HUMAN	P62263	RS14_HUMAN	RPS14	151	Homo sapiens	1:Experimental evidence at protein level	40S ribosomal protein S14	1	0.999	8	69	69	69	7	4	5	5	11	10	2	5	4	6	3	7	7	4	5	5	11	10	2	5	4	6	3	7	7	4	5	5	11	10	2	5	4	6	3	7
sp|P62266|RS23_HUMAN	P62266	RS23_HUMAN	RPS23	143	Homo sapiens	1:Experimental evidence at protein level	40S ribosomal protein S23	0.9351	0.9988	1	1	1	1	0	0	0	0	0	0	1	0	0	0	0	0	0	0	0	0	0	0	1	0	0	0	0	0	0	0	0	0	0	0	1	0	0	0	0	0
sp|P62269|RS18_HUMAN	P62269	RS18_HUMAN	RPS18	152	Homo sapiens	1:Experimental evidence at protein level	40S ribosomal protein S18	1	0.999	3	20	20	20	1	2	2	2	3	2	1	1	1	1	2	2	1	2	2	2	3	2	1	1	1	1	2	2	1	2	2	2	3	2	1	1	1	1	2	2
sp|P62273-2|RS29_HUMAN	P62273-2	RS29_HUMAN	RPS29	67	Homo sapiens		Isoform 2 of 40S ribosomal protein S29	1	0.999	1	60	0	60	4	3	5	6	4	4	4	3	7	7	9	4	0	0	0	0	0	0	0	0	0	0	0	0	4	3	5	6	4	4	4	3	7	7	9	4
sp|P62277|RS13_HUMAN	P62277	RS13_HUMAN	RPS13	151	Homo sapiens	1:Experimental evidence at protein level	40S ribosomal protein S13	1	0.999	3	64	64	64	4	7	4	3	8	4	5	9	6	5	4	5	4	7	4	3	8	4	5	9	6	5	4	5	4	7	4	3	8	4	5	9	6	5	4	5
sp|P62280|RS11_HUMAN	P62280	RS11_HUMAN	RPS11	158	Homo sapiens	1:Experimental evidence at protein level	40S ribosomal protein S11	1	0.999	5	88	88	88	8	9	4	8	10	6	6	5	8	8	7	9	8	9	4	8	10	6	6	5	8	8	7	9	8	9	4	8	10	6	6	5	8	8	7	9
sp|P62304|RUXE_HUMAN	P62304	RUXE_HUMAN	SNRPE	92	Homo sapiens	1:Experimental evidence at protein level	Small nuclear ribonucleoprotein E	1	0.999	2	11	11	11	2	2	0	0	1	0	1	1	1	1	1	1	2	2	0	0	1	0	1	1	1	1	1	1	2	2	0	0	1	0	1	1	1	1	1	1
sp|P62306|RUXF_HUMAN	P62306	RUXF_HUMAN	SNRPF	86	Homo sapiens	1:Experimental evidence at protein level	Small nuclear ribonucleoprotein F	1	0.999	4	98	98	98	4	8	6	4	15	9	9	6	9	9	11	8	4	8	6	4	15	9	9	6	9	9	11	8	4	8	6	4	15	9	9	6	9	9	11	8
sp|P62314|SMD1_HUMAN	P62314	SMD1_HUMAN	SNRPD1	119	Homo sapiens	1:Experimental evidence at protein level	Small nuclear ribonucleoprotein Sm D1	1	0.999	3	62	62	62	4	6	8	6	4	5	3	4	4	5	4	9	4	6	8	6	4	5	3	4	4	5	4	9	4	6	8	6	4	5	3	4	4	5	4	9
sp|P62316|SMD2_HUMAN	P62316	SMD2_HUMAN	SNRPD2	118	Homo sapiens	1:Experimental evidence at protein level	Small nuclear ribonucleoprotein Sm D2	1	0.999	4	53	14	53	5	5	1	6	5	3	4	1	3	5	7	8	2	2	0	2	2	0	0	0	0	2	2	2	5	5	1	6	5	3	4	1	3	5	7	8
sp|P62318-2|SMD3_HUMAN	P62318-2	SMD3_HUMAN	SNRPD3	120	Homo sapiens		Isoform 2 of Small nuclear ribonucleoprotein Sm D3	1	0.999	2	54	0	54	5	5	2	5	3	4	6	4	5	3	7	5	0	0	0	0	0	0	0	0	0	0	0	0	5	5	2	5	3	4	6	4	5	3	7	5
sp|P62328|TYB4_HUMAN	P62328	TYB4_HUMAN	TMSB4X	44	Homo sapiens	1:Experimental evidence at protein level	Thymosin beta-4	1	0.999	8	845	845	845	66	75	67	74	81	78	70	62	58	67	75	72	66	75	67	74	81	78	70	62	58	67	75	72	66	75	67	74	81	78	70	62	58	67	75	72
sp|P62330|ARF6_HUMAN	P62330	ARF6_HUMAN	ARF6	175	Homo sapiens	1:Experimental evidence at protein level	ADP-ribosylation factor 6	1	0.999	4	65	65	65	3	4	12	16	7	7	1	3	3	3	4	2	3	4	12	16	7	7	1	3	3	3	4	2	3	4	12	16	7	7	1	3	3	3	4	2
sp|P62333|PRS10_HUMAN	P62333	PRS10_HUMAN	PSMC6	389	Homo sapiens	1:Experimental evidence at protein level	26S proteasome regulatory subunit 10B	1	0.999	6	116	116	116	11	16	4	6	11	12	9	7	10	8	11	11	11	16	4	6	11	12	9	7	10	8	11	11	11	16	4	6	11	12	9	7	10	8	11	11
sp|P62341|SELT_HUMAN	P62341	SELT_HUMAN	SELENOT	195	Homo sapiens	1:Experimental evidence at protein level	Thioredoxin reductase-like selenoprotein T	1	0.999	2	5	5	5	0	0	0	1	2	0	0	0	0	0	2	0	0	0	0	1	2	0	0	0	0	0	2	0	0	0	0	1	2	0	0	0	0	0	2	0
sp|P62380|TBPL1_HUMAN	P62380	TBPL1_HUMAN	TBPL1	186	Homo sapiens	1:Experimental evidence at protein level	TATA box-binding protein-like 1	0.9459	0.999	1	4	4	4	0	0	0	0	0	0	0	1	0	0	2	1	0	0	0	0	0	0	0	1	0	0	2	1	0	0	0	0	0	0	0	1	0	0	2	1
sp|P62424|RL7A_HUMAN	P62424	RL7A_HUMAN	RPL7A	266	Homo sapiens	1:Experimental evidence at protein level	60S ribosomal protein L7a	1	0.999	10	197	197	197	23	21	14	11	21	19	13	9	14	14	19	19	23	21	14	11	21	19	13	9	14	14	19	19	23	21	14	11	21	19	13	9	14	14	19	19
sp|P62495-2|ERF1_HUMAN	P62495-2	ERF1_HUMAN	ETF1	404	Homo sapiens		Isoform 2 of Eukaryotic peptide chain release factor subunit 1	1	0.999	4	46	0	46	4	5	1	0	3	5	2	7	7	3	6	3	0	0	0	0	0	0	0	0	0	0	0	0	4	5	1	0	3	5	2	7	7	3	6	3
sp|P62633-2|CNBP_HUMAN	P62633-2	CNBP_HUMAN	CNBP	170	Homo sapiens		Isoform 2 of CCHC-type zinc finger nucleic acid binding protein	1	0.999	7	98	0	98	12	10	3	5	6	3	10	7	12	9	11	10	0	0	0	0	0	0	0	0	0	0	0	0	12	10	3	5	6	3	10	7	12	9	11	10
sp|P62699|YPEL5_HUMAN	P62699	YPEL5_HUMAN	YPEL5	121	Homo sapiens	1:Experimental evidence at protein level	Protein yippee-like 5	0.8556	0.997	1	1	1	1	0	0	0	0	0	0	0	0	1	0	0	0	0	0	0	0	0	0	0	0	1	0	0	0	0	0	0	0	0	0	0	0	1	0	0	0
sp|P62701|RS4X_HUMAN	P62701	RS4X_HUMAN	RPS4X	263	Homo sapiens	1:Experimental evidence at protein level	40S ribosomal protein S4, X isoform	1	0.999	7	130	95	130	15	17	5	5	11	7	9	5	17	13	13	13	12	14	1	1	9	5	5	3	15	10	10	10	15	17	5	5	11	7	9	5	17	13	13	13
sp|P62714|PP2AB_HUMAN	P62714	PP2AB_HUMAN	PPP2CB	309	Homo sapiens	1:Experimental evidence at protein level	Serine/threonine-protein phosphatase 2A catalytic subunit beta isoform	1	0.999	7	69	0	69	6	10	4	5	8	4	5	3	6	6	7	5	0	0	0	0	0	0	0	0	0	0	0	0	6	10	4	5	8	4	5	3	6	6	7	5
sp|P62750|RL23A_HUMAN	P62750	RL23A_HUMAN	RPL23A	156	Homo sapiens	1:Experimental evidence at protein level	60S ribosomal protein L23a	1	0.999	5	64	64	64	11	6	2	5	8	4	4	4	3	5	7	5	11	6	2	5	8	4	4	4	3	5	7	5	11	6	2	5	8	4	4	4	3	5	7	5
sp|P62753|RS6_HUMAN	P62753	RS6_HUMAN	RPS6	249	Homo sapiens	1:Experimental evidence at protein level	40S ribosomal protein S6	1	0.999	6	35	35	35	6	5	4	4	4	2	1	1	1	2	2	3	6	5	4	4	4	2	1	1	1	2	2	3	6	5	4	4	4	2	1	1	1	2	2	3
sp|P62805|H4_HUMAN	P62805	H4_HUMAN	H4C1	103	Homo sapiens	1:Experimental evidence at protein level	Histone H4	1	0.999	11	490	490	490	40	41	44	31	67	61	29	20	20	20	64	53	40	41	44	31	67	61	29	20	20	20	64	53	40	41	44	31	67	61	29	20	20	20	64	53
sp|P62820-2|RAB1A_HUMAN	P62820-2	RAB1A_HUMAN	RAB1A	141	Homo sapiens		Isoform 2 of Ras-related protein Rab-1A	1	0.999	4	225	0	225	19	24	5	1	15	25	28	10	24	20	26	28	0	0	0	0	0	0	0	0	0	0	0	0	19	24	5	1	15	25	28	10	24	20	26	28
sp|P62826|RAN_HUMAN	P62826	RAN_HUMAN	RAN	216	Homo sapiens	1:Experimental evidence at protein level	GTP-binding nuclear protein Ran	1	0.999	8	208	208	208	6	7	48	24	11	10	22	20	14	16	14	16	6	7	48	24	11	10	22	20	14	16	14	16	6	7	48	24	11	10	22	20	14	16	14	16
sp|P62829|RL23_HUMAN	P62829	RL23_HUMAN	RPL23	140	Homo sapiens	1:Experimental evidence at protein level	60S ribosomal protein L23	0.9469	0.999	1	75	75	75	10	7	1	0	6	3	4	1	11	6	16	10	10	7	1	0	6	3	4	1	11	6	16	10	10	7	1	0	6	3	4	1	11	6	16	10
sp|P62834|RAP1A_HUMAN	P62834	RAP1A_HUMAN	RAP1A	184	Homo sapiens	1:Experimental evidence at protein level	Ras-related protein Rap-1A	1	0.999	5	17	17	48	1	2	0	0	2	2	1	2	2	1	2	2	1	2	0	0	2	2	1	2	2	1	2	2	3	5	3	2	6	5	3	4	6	3	4	4
sp|P62841|RS15_HUMAN	P62841	RS15_HUMAN	RPS15	145	Homo sapiens	1:Experimental evidence at protein level	40S ribosomal protein S15	1	0.999	7	202	202	202	9	8	38	34	24	17	7	9	13	15	17	11	9	8	38	34	24	17	7	9	13	15	17	11	9	8	38	34	24	17	7	9	13	15	17	11
sp|P62847-2|RS24_HUMAN	P62847-2	RS24_HUMAN	RPS24	130	Homo sapiens		Isoform 2 of 40S ribosomal protein S24	1	0.999	3	37	0	37	5	6	2	1	4	4	1	2	1	1	3	7	0	0	0	0	0	0	0	0	0	0	0	0	5	6	2	1	4	4	1	2	1	1	3	7
sp|P62851|RS25_HUMAN	P62851	RS25_HUMAN	RPS25	125	Homo sapiens	1:Experimental evidence at protein level	40S ribosomal protein S25	1	0.999	3	35	35	35	1	1	11	4	2	4	4	1	1	2	2	2	1	1	11	4	2	4	4	1	1	2	2	2	1	1	11	4	2	4	4	1	1	2	2	2
sp|P62854|RS26_HUMAN	P62854	RS26_HUMAN	RPS26	115	Homo sapiens	1:Experimental evidence at protein level	40S ribosomal protein S26	1	0.999	3	41	4	41	6	5	2	3	4	1	3	2	3	4	4	4	2	2	0	0	0	0	0	0	0	0	0	0	6	5	2	3	4	1	3	2	3	4	4	4
sp|P62857|RS28_HUMAN	P62857	RS28_HUMAN	RPS28	69	Homo sapiens	1:Experimental evidence at protein level	40S ribosomal protein S28	1	0.999	3	22	22	22	2	2	3	1	1	2	1	2	2	2	2	2	2	2	3	1	1	2	1	2	2	2	2	2	2	2	3	1	1	2	1	2	2	2	2	2
sp|P62873|GBB1_HUMAN	P62873	GBB1_HUMAN	GNB1	340	Homo sapiens	1:Experimental evidence at protein level	Guanine nucleotide-binding protein G(I)/G(S)/G(T) subunit beta-1	1	0.999	6	125	0	125	17	12	7	7	13	9	8	6	14	9	11	12	0	0	0	0	0	0	0	0	0	0	0	0	17	12	7	7	13	9	8	6	14	9	11	12
sp|P62877|RBX1_HUMAN	P62877	RBX1_HUMAN	RBX1	108	Homo sapiens	1:Experimental evidence at protein level	E3 ubiquitin-protein ligase RBX1	0.9469	0.999	1	18	18	18	2	2	2	1	1	1	2	1	3	1	1	1	2	2	2	1	1	1	2	1	3	1	1	1	2	2	2	1	1	1	2	1	3	1	1	1
sp|P62879|GBB2_HUMAN	P62879	GBB2_HUMAN	GNB2	340	Homo sapiens	1:Experimental evidence at protein level	Guanine nucleotide-binding protein G(I)/G(S)/G(T) subunit beta-2	1	0.999	6	39	0	114	2	1	4	3	5	3	3	2	3	3	7	3	0	0	0	0	0	0	0	0	0	0	0	0	13	8	6	4	13	10	7	5	13	8	15	12
sp|P62888|RL30_HUMAN	P62888	RL30_HUMAN	RPL30	115	Homo sapiens	1:Experimental evidence at protein level	60S ribosomal protein L30	1	0.999	3	78	78	78	4	5	8	9	8	7	4	6	7	7	7	6	4	5	8	9	8	7	4	6	7	7	7	6	4	5	8	9	8	7	4	6	7	7	7	6
sp|P62891|RL39_HUMAN	P62891	RL39_HUMAN	RPL39	51	Homo sapiens	1:Experimental evidence at protein level	60S ribosomal protein L39	0.9462	0.999	1	6	0	6	0	0	1	1	1	1	0	0	0	0	1	1	0	0	0	0	0	0	0	0	0	0	0	0	0	0	1	1	1	1	0	0	0	0	1	1
sp|P62899-2|RL31_HUMAN	P62899-2	RL31_HUMAN	RPL31	128	Homo sapiens		Isoform 2 of 60S ribosomal protein L31	1	0.999	3	22	0	22	1	2	5	3	2	1	1	0	1	0	3	3	0	0	0	0	0	0	0	0	0	0	0	0	1	2	5	3	2	1	1	0	1	0	3	3
sp|P62906|RL10A_HUMAN	P62906	RL10A_HUMAN	RPL10A	217	Homo sapiens	1:Experimental evidence at protein level	60S ribosomal protein L10a	1	0.999	9	136	136	136	11	12	9	9	10	18	8	10	11	10	12	16	11	12	9	9	10	18	8	10	11	10	12	16	11	12	9	9	10	18	8	10	11	10	12	16
sp|P62910|RL32_HUMAN	P62910	RL32_HUMAN	RPL32	135	Homo sapiens	1:Experimental evidence at protein level	60S ribosomal protein L32	1	0.999	5	65	65	65	5	4	4	5	6	6	7	5	5	4	7	7	5	4	4	5	6	6	7	5	5	4	7	7	5	4	4	5	6	6	7	5	5	4	7	7
sp|P62913-2|RL11_HUMAN	P62913-2	RL11_HUMAN	RPL11	177	Homo sapiens		Isoform 2 of 60S ribosomal protein L11	0.9996	0.999	4	13	13	44	1	0	1	2	1	1	1	1	1	1	2	1	1	0	1	2	1	1	1	1	1	1	2	1	4	6	3	3	5	4	2	3	3	3	4	4
sp|P62913|RL11_HUMAN	P62913	RL11_HUMAN	RPL11	178	Homo sapiens	1:Experimental evidence at protein level	60S ribosomal protein L11	1	0.999	4	75	44	75	6	11	8	3	7	7	10	4	4	5	4	6	3	5	6	2	3	4	9	2	2	3	2	3	6	11	8	3	7	7	10	4	4	5	4	6
sp|P62917|RL8_HUMAN	P62917	RL8_HUMAN	RPL8	257	Homo sapiens	1:Experimental evidence at protein level	60S ribosomal protein L8	1	0.999	6	73	73	73	8	7	12	9	11	8	2	2	2	2	5	5	8	7	12	9	11	8	2	2	2	2	5	5	8	7	12	9	11	8	2	2	2	2	5	5
sp|P62937|PPIA_HUMAN	P62937	PPIA_HUMAN	PPIA	165	Homo sapiens	1:Experimental evidence at protein level	Peptidyl-prolyl cis-trans isomerase A	1	0.999	11	775	763	775	62	63	73	45	87	66	60	60	56	53	77	73	58	60	73	45	84	66	60	58	56	53	77	73	62	63	73	45	87	66	60	60	56	53	77	73
sp|P62942|FKB1A_HUMAN	P62942	FKB1A_HUMAN	FKBP1A	108	Homo sapiens	1:Experimental evidence at protein level	Peptidyl-prolyl cis-trans isomerase FKBP1A	1	0.999	4	116	116	116	6	7	13	11	5	5	11	14	15	11	9	9	6	7	13	11	5	5	11	14	15	11	9	9	6	7	13	11	5	5	11	14	15	11	9	9
sp|P62979|RS27A_HUMAN	P62979	RS27A_HUMAN	RPS27A	156	Homo sapiens	1:Experimental evidence at protein level	Ubiquitin-40S ribosomal protein S27a	1	0.999	6	212	133	212	19	15	8	10	21	24	17	15	19	19	23	22	14	11	5	8	13	10	15	9	12	10	14	12	19	15	8	10	21	24	17	15	19	19	23	22
sp|P62987|RL40_HUMAN	P62987	RL40_HUMAN	UBA52	128	Homo sapiens	1:Experimental evidence at protein level	Ubiquitin-60S ribosomal protein L40	1	0.999	5	48	48	127	4	4	7	4	4	3	3	2	4	5	4	4	4	4	7	4	4	3	3	2	4	5	4	4	9	8	10	6	12	17	5	8	11	14	13	14
sp|P62993|GRB2_HUMAN	P62993	GRB2_HUMAN	GRB2	217	Homo sapiens	1:Experimental evidence at protein level	Growth factor receptor-bound protein 2	1	0.999	5	35	2	35	6	6	0	1	3	3	0	2	4	1	3	6	0	1	0	0	1	0	0	0	0	0	0	0	6	6	0	1	3	3	0	2	4	1	3	6
sp|P62995-3|TRA2B_HUMAN	P62995-3	TRA2B_HUMAN	TRA2B	188	Homo sapiens		Isoform 3 of Transformer-2 protein homolog beta	1	0.999	5	59	0	59	6	6	2	3	6	6	4	2	6	5	5	8	0	0	0	0	0	0	0	0	0	0	0	0	6	6	2	3	6	6	4	2	6	5	5	8
sp|P63000-2|RAC1_HUMAN	P63000-2	RAC1_HUMAN	RAC1	211	Homo sapiens		Isoform B of Ras-related C3 botulinum toxin substrate 1	1	0.999	8	75	0	75	7	7	3	2	10	5	3	4	8	7	11	8	0	0	0	0	0	0	0	0	0	0	0	0	7	7	3	2	10	5	3	4	8	7	11	8
sp|P63010-2|AP2B1_HUMAN	P63010-2	AP2B1_HUMAN	AP2B1	951	Homo sapiens		Isoform 2 of AP-2 complex subunit beta	1	0.999	16	113	0	113	13	12	9	8	12	11	8	7	10	8	9	6	0	0	0	0	0	0	0	0	0	0	0	0	13	12	9	8	12	11	8	7	10	8	9	6
sp|P63092-2|GNAS2_HUMAN	P63092-2	GNAS2_HUMAN	GNAS	380	Homo sapiens		Isoform Gnas-2 of Guanine nucleotide-binding protein G(s) subunit alpha isoforms short	1	0.999	4	55	0	55	6	2	3	5	5	3	3	3	8	6	5	6	0	0	0	0	0	0	0	0	0	0	0	0	6	2	3	5	5	3	3	3	8	6	5	6
sp|P63098|CANB1_HUMAN	P63098	CANB1_HUMAN	PPP3R1	170	Homo sapiens	1:Experimental evidence at protein level	Calcineurin subunit B type 1	1	0.999	2	13	13	13	1	1	1	1	1	1	1	1	1	2	1	1	1	1	1	1	1	1	1	1	1	2	1	1	1	1	1	1	1	1	1	1	1	2	1	1
sp|P63104|1433Z_HUMAN	P63104	1433Z_HUMAN	YWHAZ	245	Homo sapiens	1:Experimental evidence at protein level	14-3-3 protein zeta/delta	1	0.999	16	580	295	926	68	77	29	24	65	45	46	34	46	51	51	44	30	34	19	14	34	21	26	18	23	25	26	25	102	117	42	31	106	73	78	51	85	71	101	69
sp|P63151-2|2ABA_HUMAN	P63151-2	2ABA_HUMAN	PPP2R2A	457	Homo sapiens		Isoform 2 of Serine/threonine-protein phosphatase 2A 55 kDa regulatory subunit B alpha isoform	1	0.999	8	76	0	76	8	9	8	8	10	3	4	5	5	6	5	5	0	0	0	0	0	0	0	0	0	0	0	0	8	9	8	8	10	3	4	5	5	6	5	5
sp|P63165|SUMO1_HUMAN	P63165	SUMO1_HUMAN	SUMO1	101	Homo sapiens	1:Experimental evidence at protein level	Small ubiquitin-related modifier 1	1	0.999	3	44	38	44	5	4	2	3	5	4	5	2	6	4	2	2	4	3	2	3	4	4	4	2	5	3	2	2	5	4	2	3	5	4	5	2	6	4	2	2
sp|P63167|DYL1_HUMAN	P63167	DYL1_HUMAN	DYNLL1	89	Homo sapiens	1:Experimental evidence at protein level	Dynein light chain 1, cytoplasmic	0.9999	0.999	4	57	57	89	8	6	0	0	5	5	5	5	3	7	4	9	8	6	0	0	5	5	5	5	3	7	4	9	10	8	3	2	9	8	7	7	5	9	8	13
sp|P63172|DYLT1_HUMAN	P63172	DYLT1_HUMAN	DYNLT1	113	Homo sapiens	1:Experimental evidence at protein level	Dynein light chain Tctex-type 1	1	0.999	2	32	32	32	2	0	1	1	4	2	4	3	6	2	4	3	2	0	1	1	4	2	4	3	6	2	4	3	2	0	1	1	4	2	4	3	6	2	4	3
sp|P63173|RL38_HUMAN	P63173	RL38_HUMAN	RPL38	70	Homo sapiens	1:Experimental evidence at protein level	60S ribosomal protein L38	1	0.999	3	98	98	98	5	7	9	8	10	9	7	7	9	8	8	11	5	7	9	8	10	9	7	7	9	8	8	11	5	7	9	8	10	9	7	7	9	8	8	11
sp|P63208|SKP1_HUMAN	P63208	SKP1_HUMAN	SKP1	163	Homo sapiens	1:Experimental evidence at protein level	S-phase kinase-associated protein 1	1	0.999	8	81	22	81	4	4	7	9	10	6	6	6	6	6	5	12	1	1	2	1	2	1	1	2	3	2	2	4	4	4	7	9	10	6	6	6	6	6	5	12
sp|P63220|RS21_HUMAN	P63220	RS21_HUMAN	RPS21	83	Homo sapiens	1:Experimental evidence at protein level	40S ribosomal protein S21	1	0.999	4	87	87	87	7	6	7	6	7	8	7	6	9	9	9	6	7	6	7	6	7	8	7	6	9	9	9	6	7	6	7	6	7	8	7	6	9	9	9	6
sp|P63241|IF5A1_HUMAN	P63241	IF5A1_HUMAN	EIF5A	154	Homo sapiens	1:Experimental evidence at protein level	Eukaryotic translation initiation factor 5A-1	1	0.999	13	461	0	461	45	41	31	26	44	41	40	34	41	35	43	40	0	0	0	0	0	0	0	0	0	0	0	0	45	41	31	26	44	41	40	34	41	35	43	40
sp|P63244|RACK1_HUMAN	P63244	RACK1_HUMAN	RACK1	317	Homo sapiens	1:Experimental evidence at protein level	Receptor of activated protein C kinase 1	1	0.999	9	313	313	313	28	29	20	23	24	19	30	28	29	24	30	29	28	29	20	23	24	19	30	28	29	24	30	29	28	29	20	23	24	19	30	28	29	24	30	29
sp|P63261|ACTG_HUMAN	P63261	ACTG_HUMAN	ACTG1	375	Homo sapiens	1:Experimental evidence at protein level	Actin, cytoplasmic 2	1	0.999	28	372	372	7078	21	26	12	3	115	41	26	33	23	25	21	26	21	26	12	3	115	41	26	33	23	25	21	26	594	649	550	266	867	627	563	513	586	622	599	642
sp|P63272|SPT4H_HUMAN	P63272	SPT4H_HUMAN	SUPT4H1	117	Homo sapiens	1:Experimental evidence at protein level	Transcription elongation factor SPT4	0.8179	0.996	1	4	4	4	0	0	0	0	0	0	1	1	0	0	1	1	0	0	0	0	0	0	1	1	0	0	1	1	0	0	0	0	0	0	1	1	0	0	1	1
sp|P63279|UBC9_HUMAN	P63279	UBC9_HUMAN	UBE2I	158	Homo sapiens	1:Experimental evidence at protein level	SUMO-conjugating enzyme UBC9	1	0.999	3	44	44	44	5	5	3	1	4	2	4	3	5	4	4	4	5	5	3	1	4	2	4	3	5	4	4	4	5	5	3	1	4	2	4	3	5	4	4	4
sp|P63302|SELW_HUMAN	P63302	SELW_HUMAN	SELENOW	87	Homo sapiens	1:Experimental evidence at protein level	Selenoprotein W	0.9459	0.999	1	2	2	2	0	0	1	1	0	0	0	0	0	0	0	0	0	0	1	1	0	0	0	0	0	0	0	0	0	0	1	1	0	0	0	0	0	0	0	0
sp|P63313|TYB10_HUMAN	P63313	TYB10_HUMAN	TMSB10	44	Homo sapiens	1:Experimental evidence at protein level	Thymosin beta-10	1	0.999	3	357	357	357	27	24	32	23	25	27	32	33	37	31	29	37	27	24	32	23	25	27	32	33	37	31	29	37	27	24	32	23	25	27	32	33	37	31	29	37
sp|P67809|YBOX1_HUMAN	P67809	YBOX1_HUMAN	YBX1	324	Homo sapiens	1:Experimental evidence at protein level	Y-box-binding protein 1	1	0.999	14	222	117	222	18	18	19	18	22	19	11	16	19	17	23	22	10	10	11	7	12	9	6	9	11	11	12	9	18	18	19	18	22	19	11	16	19	17	23	22
sp|P67812-3|SC11A_HUMAN	P67812-3	SC11A_HUMAN	SEC11A	185	Homo sapiens		Isoform 3 of Signal peptidase complex catalytic subunit SEC11A	1	0.999	2	7	0	7	0	1	3	3	0	0	0	0	0	0	0	0	0	0	0	0	0	0	0	0	0	0	0	0	0	1	3	3	0	0	0	0	0	0	0	0
sp|P67870|CSK2B_HUMAN	P67870	CSK2B_HUMAN	CSNK2B	215	Homo sapiens	1:Experimental evidence at protein level	Casein kinase II subunit beta	1	0.999	4	41	41	41	2	4	0	0	4	5	6	2	5	3	4	6	2	4	0	0	4	5	6	2	5	3	4	6	2	4	0	0	4	5	6	2	5	3	4	6
sp|P67936-2|TPM4_HUMAN	P67936-2	TPM4_HUMAN	TPM4	284	Homo sapiens		Isoform 2 of Tropomyosin alpha-4 chain	1	0.999	21	232	85	385	16	18	21	24	19	13	18	20	19	20	22	22	5	5	11	12	4	4	6	7	7	8	8	8	33	32	32	31	32	27	31	33	33	33	35	33
sp|P67936|TPM4_HUMAN	P67936	TPM4_HUMAN	TPM4	248	Homo sapiens	1:Experimental evidence at protein level	Tropomyosin alpha-4 chain	1	0.999	18	53	53	310	4	4	1	1	7	5	4	6	7	4	5	5	4	4	1	1	7	5	4	6	7	4	5	5	29	27	19	15	32	24	27	28	29	25	29	26
sp|P68032|ACTC_HUMAN	P68032	ACTC_HUMAN	ACTC1	377	Homo sapiens	1:Experimental evidence at protein level	Actin, alpha cardiac muscle 1	0.9852	0.999	22	1	0	1821	1	0	0	0	0	0	0	0	0	0	0	0	0	0	0	0	0	0	0	0	0	0	0	0	152	168	172	115	218	135	172	95	153	166	139	136
sp|P68036|UB2L3_HUMAN	P68036	UB2L3_HUMAN	UBE2L3	154	Homo sapiens	1:Experimental evidence at protein level	Ubiquitin-conjugating enzyme E2 L3	1	0.999	7	223	0	223	13	15	9	8	56	41	8	12	15	16	19	11	0	0	0	0	0	0	0	0	0	0	0	0	13	15	9	8	56	41	8	12	15	16	19	11
sp|P68104|EF1A1_HUMAN	P68104	EF1A1_HUMAN	EEF1A1	462	Homo sapiens	1:Experimental evidence at protein level	Elongation factor 1-alpha 1	1	0.999	20	2521	213	2521	180	162	176	135	256	218	233	215	219	232	262	233	19	17	0	0	11	17	26	20	24	25	30	24	180	162	176	135	256	218	233	215	219	232	262	233
sp|P68106|FKB1B_HUMAN	P68106	FKB1B_HUMAN	FKBP1B	108	Homo sapiens	1:Experimental evidence at protein level	Peptidyl-prolyl cis-trans isomerase FKBP1B	1	0.9976	3	3	1	3	0	1	0	1	0	1	0	0	0	0	0	0	0	0	0	0	0	1	0	0	0	0	0	0	0	1	0	1	0	1	0	0	0	0	0	0
sp|P68133|ACTS_HUMAN	P68133	ACTS_HUMAN	ACTA1	377	Homo sapiens	1:Experimental evidence at protein level	Actin, alpha skeletal muscle	1	0.999	21	292	2	1812	33	33	12	13	24	26	34	19	24	26	32	16	0	0	0	0	1	0	1	0	0	0	0	0	150	168	172	115	219	135	171	94	151	164	137	136
sp|P68366-2|TBA4A_HUMAN	P68366-2	TBA4A_HUMAN	TUBA4A	433	Homo sapiens		Isoform 2 of Tubulin alpha-4A chain	1	0.999	17	914	0	914	87	97	31	25	68	64	99	59	96	88	100	100	0	0	0	0	0	0	0	0	0	0	0	0	87	97	31	25	68	64	99	59	96	88	100	100
sp|P68371|TBB4B_HUMAN	P68371	TBB4B_HUMAN	TUBB4B	445	Homo sapiens	1:Experimental evidence at protein level	Tubulin beta-4B chain	1	0.999	20	176	5	914	16	15	0	1	17	14	15	10	18	16	30	24	1	1	0	0	2	0	0	0	0	0	1	0	78	83	57	36	102	78	89	53	86	77	86	89
sp|P68400|CSK21_HUMAN	P68400	CSK21_HUMAN	CSNK2A1	391	Homo sapiens	1:Experimental evidence at protein level	Casein kinase II subunit alpha	1	0.999	11	87	0	87	1	4	10	7	7	3	5	10	9	11	8	12	0	0	0	0	0	0	0	0	0	0	0	0	1	4	10	7	7	3	5	10	9	11	8	12
sp|P68402|PA1B2_HUMAN	P68402	PA1B2_HUMAN	PAFAH1B2	229	Homo sapiens	1:Experimental evidence at protein level	Platelet-activating factor acetylhydrolase IB subunit alpha2	1	0.999	7	99	26	99	9	11	8	5	10	7	6	5	9	9	7	13	4	3	0	0	2	2	1	1	3	3	2	5	9	11	8	5	10	7	6	5	9	9	7	13
sp|P68431|H31_HUMAN	P68431	H31_HUMAN	H3C1	136	Homo sapiens	1:Experimental evidence at protein level	Histone H3.1	1	0.999	5	183	87	183	12	10	72	20	9	4	12	6	8	5	9	16	3	2	65	14	1	0	0	0	0	0	0	2	12	10	72	20	9	4	12	6	8	5	9	16
sp|P69849|NOMO3_HUMAN	P69849	NOMO3_HUMAN	NOMO3	1222	Homo sapiens	1:Experimental evidence at protein level	BOS complex subunit NOMO3	1	0.999	10	52	0	52	5	7	3	3	4	3	6	8	5	4	2	2	0	0	0	0	0	0	0	0	0	0	0	0	5	7	3	3	4	3	6	8	5	4	2	2
sp|P69905|HBA_HUMAN	P69905	HBA_HUMAN	HBA2	142	Homo sapiens	1:Experimental evidence at protein level	Hemoglobin subunit alpha	0.9365	0.9988	1	2	2	2	0	0	0	0	2	0	0	0	0	0	0	0	0	0	0	0	2	0	0	0	0	0	0	0	0	0	0	0	2	0	0	0	0	0	0	0
sp|P78318|IGBP1_HUMAN	P78318	IGBP1_HUMAN	IGBP1	339	Homo sapiens	1:Experimental evidence at protein level	Immunoglobulin-binding protein 1	1	0.999	3	35	35	35	3	1	4	4	3	1	2	4	4	2	5	2	3	1	4	4	3	1	2	4	4	2	5	2	3	1	4	4	3	1	2	4	4	2	5	2
sp|P78330|SERB_HUMAN	P78330	SERB_HUMAN	PSPH	225	Homo sapiens	1:Experimental evidence at protein level	Phosphoserine phosphatase	1	0.999	5	9	9	9	0	4	0	0	1	2	0	0	0	0	1	1	0	4	0	0	1	2	0	0	0	0	1	1	0	4	0	0	1	2	0	0	0	0	1	1
sp|P78344|IF4G2_HUMAN	P78344	IF4G2_HUMAN	EIF4G2	907	Homo sapiens	1:Experimental evidence at protein level	Eukaryotic translation initiation factor 4 gamma 2	1	0.999	5	23	1	23	2	3	1	0	4	0	0	1	2	5	1	4	0	0	0	0	0	0	0	0	0	0	0	1	2	3	1	0	4	0	0	1	2	5	1	4
sp|P78345|RPP38_HUMAN	P78345	RPP38_HUMAN	RPP38	283	Homo sapiens	1:Experimental evidence at protein level	Ribonuclease P protein subunit p38	0.9982	0.999	2	4	4	4	0	0	1	2	1	0	0	0	0	0	0	0	0	0	1	2	1	0	0	0	0	0	0	0	0	0	1	2	1	0	0	0	0	0	0	0
sp|P78346-2|RPP30_HUMAN	P78346-2	RPP30_HUMAN	RPP30	322	Homo sapiens		Isoform 2 of Ribonuclease P protein subunit p30	1	0.999	4	36	0	36	2	0	7	7	3	3	2	2	2	2	5	1	0	0	0	0	0	0	0	0	0	0	0	0	2	0	7	7	3	3	2	2	2	2	5	1
sp|P78347-2|GTF2I_HUMAN	P78347-2	GTF2I_HUMAN	GTF2I	957	Homo sapiens		Isoform 2 of General transcription factor II-I	1	0.999	6	35	0	35	4	3	1	1	4	2	2	3	3	5	4	3	0	0	0	0	0	0	0	0	0	0	0	0	4	3	1	1	4	2	2	3	3	5	4	3
sp|P78356|PI42B_HUMAN	P78356	PI42B_HUMAN	PIP4K2B	416	Homo sapiens	1:Experimental evidence at protein level	Phosphatidylinositol 5-phosphate 4-kinase type-2 beta	0.9962	0.999	2	9	0	19	0	0	1	1	0	1	0	3	1	2	0	0	0	0	0	0	0	0	0	0	0	0	0	0	0	1	4	3	0	1	2	4	1	3	0	0
sp|P78371|TCPB_HUMAN	P78371	TCPB_HUMAN	CCT2	535	Homo sapiens	1:Experimental evidence at protein level	T-complex protein 1 subunit beta	1	0.999	25	459	23	459	36	35	28	28	49	44	30	37	38	43	46	45	2	4	0	0	3	2	3	1	2	2	2	2	36	35	28	28	49	44	30	37	38	43	46	45
sp|P78382-2|S35A1_HUMAN	P78382-2	S35A1_HUMAN	SLC35A1	278	Homo sapiens		Isoform 2 of CMP-sialic acid transporter	0.9469	0.999	1	9	0	9	2	3	0	0	1	0	0	1	1	1	0	0	0	0	0	0	0	0	0	0	0	0	0	0	2	3	0	0	1	0	0	1	1	1	0	0
sp|P78406|RAE1L_HUMAN	P78406	RAE1L_HUMAN	RAE1	368	Homo sapiens	1:Experimental evidence at protein level	mRNA export factor RAE1	1	0.999	4	39	39	39	3	4	2	2	3	5	1	2	3	4	6	4	3	4	2	2	3	5	1	2	3	4	6	4	3	4	2	2	3	5	1	2	3	4	6	4
sp|P78417-3|GSTO1_HUMAN	P78417-3	GSTO1_HUMAN	GSTO1	213	Homo sapiens		Isoform 3 of Glutathione S-transferase omega-1	1	0.999	8	135	0	135	11	11	8	10	19	11	8	9	14	10	11	13	0	0	0	0	0	0	0	0	0	0	0	0	11	11	8	10	19	11	8	9	14	10	11	13
[truncated: 2,456 more rows]
[truncated: 25 more columns]

## Sheet: Fold Change >2 or p <0.5 
Protein	Protein ID	Entry Name	Gene	Protein Length	Organism	Protein Existence	Description	wt1_S1_A1_1_20821 MaxLFQ Intensity	wt1_S1_A2_1_20822 MaxLFQ Intensity	wt2_S1_A3_1_20823 MaxLFQ Intensity	wt2_S1_A4_1_20824 MaxLFQ Intensity	wt3_S1_A5_1_20825 MaxLFQ Intensity	wt3_S1_A6_1_20826 MaxLFQ Intensity	ko1_S1_A7_1_20827 MaxLFQ Intensity	ko1_S1_A8_1_20828 MaxLFQ Intensity	ko2_S1_A10_1_20834 MaxLFQ Intensity	ko2_S1_A9_1_20833 MaxLFQ Intensity	ko3_S1_A11_1_20831 MaxLFQ Intensity	ko3_S1_A12_1_20832 MaxLFQ Intensity		Aver WT	Aver KO	Ratio KO/WT	T-test KO VS WT
[truncated: 570 more rows]

[truncated: 1 more sheets: UP BY CLUSTERS]
