# Supplementary material for: Tight Junction-high and CDH17-positive cell population is the Source of Colorectal Cancer Liver Metastases
Source: Research Square preprint supplement (doi:10.21203/rs.3.rs-6998644/v1), 2025-07-09
Supplement: Supplementary file 2 [file 4d7265b579201c7b775d02c9.xlsx]

## Sheet: README
	Each sheet lists genes identified as markers per cluster as shown in UMAP (Fig.4). A total of 10 clusters are considered.
	Markers have been identified with function FindConservedMarkers from Seurat (v5.0.0) with following criteria:
	i) adj pval < 0.05 and
	ii) log FC >0.5 and
	iii) cell percentage in cluster of interest > 0.25.
	All sheets include following columns:
	GENE	Gene name. Sorted per min.log2FC column
	max.adj.pval	Worst adjusted p-value among the three conditions (IKKa WT, IKKa KO, IKKa KO + CLDN2 inhibited)
	min.log2FC	Worst log2 Fold Change among the three conditions
	IKK_ko_p_val	P-value obtained from applying Wilcoxon Rank Sum test between cluster of interest and the rest of clusters.
	X_avg_log2FC	Log2 FC of the average expression between cluster of interest and the rest of clusters
	X_pct.1	Percentage of cells where specific gene is detected in cluster of interest
	X_pct.2	Percentage of cells where specific gene is detected in the rest of clusters
	X_p_val_adj	Adjusted p-value (Bonferroni correction, all genes in dataset considered)
	where X refers to the condition (unique sample): IKKa WT, IKKa KO, IKKa KO + CLDN2 inhibited

## Sheet: Cluster_0
GENE	max.adj.pval	min.log2FC	IKK_ko_p_val	IKK_ko_avg_log2FC	IKK_ko_pct.1	IKK_ko_pct.2	IKK_ko_p_val_adj	IKK_ko_CLD_inh_p_val	IKK_ko_CLD_inh_avg_log2FC	IKK_ko_CLD_inh_pct.1	IKK_ko_CLD_inh_pct.2	IKK_ko_CLD_inh_p_val_adj	WT_p_val	WT_avg_log2FC	WT_pct.1	WT_pct.2	WT_p_val_adj
MYO1A	7.94907e-18	1.12539	3.01801e-54	1.29648	0.436	0.205	7.72189e-50	3.10681e-22	1.12539	0.26	0.139	7.94907e-18	3.56366e-38	1.49555	0.254	0.115	9.11799e-34
A1CF	9.41929e-24	1.02537	6.21384e-42	1.23377	0.381	0.183	1.58987e-37	3.68142e-28	1.02537	0.284	0.142	9.41929e-24	8.26249e-36	1.06	0.383	0.222	2.11404e-31
PRSS2	0.000910839	0.844806	1.78228e-34	1.00019	0.713	0.537	4.56014e-30	5.68636e-73	1.20827	0.811	0.593	1.45491e-68	3.55991e-08	0.844806	0.369	0.3	0.000910839
PHGR1	3.42116e-25	0.822385	9.12539e-69	0.896616	0.733	0.474	2.33482e-64	7.01652e-35	0.822385	0.595	0.401	1.79525e-30	1.33712e-29	0.89964	0.521	0.381	3.42116e-25
IFI27	1.19708e-12	0.711477	1.57494e-25	0.711477	0.509	0.346	4.02965e-21	1.26605e-31	0.836179	0.527	0.351	3.23931e-27	4.67867e-17	0.758795	0.519	0.428	1.19708e-12
TLDC2	5.84158e-18	0.69883	1.15138e-34	0.786462	0.548	0.35	2.94593e-30	3.32345e-25	0.716745	0.503	0.342	8.50339e-21	2.28311e-22	0.69883	0.467	0.338	5.84158e-18
EIF6	3.6672e-76	0.678372	1.43328e-80	0.712277	0.958	0.837	3.6672e-76	7.4698e-100	0.75064	0.962	0.856	1.91122e-95	1.28875e-82	0.678372	0.933	0.82	3.29739e-78
ALDH1A1	1.40455e-33	0.677759	8.34963e-69	0.873538	0.82	0.587	2.13634e-64	3.34042e-75	0.8674	0.863	0.63	8.5468e-71	5.48954e-38	0.677759	0.658	0.486	1.40455e-33
CYP4F3	9.69515e-18	0.67466	3.78924e-22	0.67466	0.483	0.327	9.69515e-18	3.28741e-22	0.742079	0.454	0.307	8.41118e-18	2.50792e-28	0.855934	0.45	0.301	6.41676e-24
ANXA13	2.30575e-35	0.672773	1.39378e-60	0.777982	0.816	0.573	3.56612e-56	3.81428e-56	0.749378	0.762	0.515	9.75923e-52	9.01178e-40	0.672773	0.685	0.517	2.30575e-35
MRPL36	9.53295e-57	0.665323	2.11815e-62	0.692624	0.915	0.773	5.41949e-58	3.72585e-61	0.665323	0.925	0.79	9.53295e-57	2.0837e-66	0.702175	0.859	0.7	5.33135e-62
AZGP1	7.54429e-74	0.664531	2.06304e-103	0.92174	0.951	0.757	5.2785e-99	1.03445e-109	0.889279	0.958	0.78	2.64673e-105	2.9486e-78	0.664531	0.951	0.836	7.54429e-74
AKR1C3	5.79089e-50	0.645823	6.12199e-59	0.645823	0.942	0.815	1.56637e-54	2.2633e-54	0.664887	0.923	0.791	5.79089e-50	4.73843e-85	0.770079	0.922	0.781	1.21238e-80
SLC22A18	3.81694e-14	0.635845	4.06402e-30	0.669127	0.633	0.454	1.03982e-25	5.97571e-26	0.659699	0.601	0.445	1.52895e-21	1.49181e-18	0.635845	0.51	0.402	3.81694e-14
TMEM150B	3.36277e-11	0.630975	1.3143e-15	0.630975	0.367	0.243	3.36277e-11	3.80965e-25	1.0077	0.302	0.164	9.74736e-21	2.33532e-21	0.890383	0.275	0.162	5.97516e-17
SDSL	1.95775e-10	0.623068	7.65166e-15	0.623068	0.395	0.275	1.95775e-10	2.19328e-22	0.749002	0.452	0.311	5.61173e-18	3.69624e-18	0.680739	0.362	0.247	9.45721e-14
CISD3	5.00225e-35	0.615254	2.46048e-43	0.659992	0.788	0.631	6.29537e-39	1.95507e-39	0.615254	0.8	0.638	5.00225e-35	1.37797e-44	0.701757	0.698	0.535	3.52568e-40
PPDPF	1.23056e-128	0.613608	4.70605e-155	0.704706	0.999	0.984	1.20409e-150	1.4172e-192	0.745995	1	0.992	3.62605e-188	4.80952e-133	0.613608	1	0.987	1.23056e-128
MDK	1.6459e-15	0.612684	2.82492e-25	0.626774	0.688	0.553	7.22784e-21	6.03418e-34	0.688785	0.708	0.544	1.54391e-29	6.43282e-20	0.612684	0.581	0.469	1.6459e-15
SSTR5-AS1	3.19567e-07	0.602536	8.5924e-18	0.850023	0.317	0.192	2.19845e-13	1.24899e-11	0.602536	0.312	0.216	3.19567e-07	1.16928e-34	1.36085	0.256	0.122	2.99172e-30
TM4SF5	4.20364e-08	0.594878	3.52553e-26	0.794942	0.466	0.301	9.02041e-22	1.64294e-12	0.594878	0.345	0.242	4.20364e-08	1.84865e-25	0.912117	0.315	0.184	4.72995e-21
SLPI	2.92296e-17	0.592736	8.79625e-22	0.592736	0.569	0.411	2.25061e-17	1.14241e-21	0.709511	0.627	0.501	2.92296e-17	5.9587e-26	0.659124	0.669	0.538	1.52459e-21
ADIRF	1.22058e-13	0.582171	1.61243e-26	0.694855	0.642	0.492	4.12556e-22	4.77049e-18	0.582171	0.644	0.521	1.22058e-13	9.50379e-85	1.11198	0.755	0.514	2.43164e-80
NDUFS7	1.2324e-19	0.577531	1.64694e-42	0.679163	0.748	0.555	4.21386e-38	1.15822e-32	0.577531	0.756	0.598	2.96342e-28	4.81668e-24	0.585478	0.609	0.494	1.2324e-19
FAM174C	4.61298e-30	0.573136	1.80293e-34	0.573136	0.802	0.645	4.61298e-30	1.32901e-49	0.651319	0.836	0.674	3.4004e-45	1.48661e-39	0.617914	0.736	0.601	3.80365e-35
ATP5MC1	6.00468e-39	0.568415	1.22034e-55	0.688064	0.901	0.734	3.12235e-51	2.34686e-43	0.568415	0.904	0.789	6.00468e-39	4.21662e-54	0.667901	0.806	0.659	1.07886e-49
SH3BGRL3	4.06821e-70	0.565537	1.61939e-86	0.624211	0.995	0.936	4.14337e-82	1.59001e-74	0.565537	0.99	0.947	4.06821e-70	1.32716e-123	0.951413	0.945	0.807	3.39566e-119
SCO2	9.77394e-08	0.5622	3.82003e-12	0.572309	0.384	0.278	9.77394e-08	1.91144e-15	0.5622	0.422	0.297	4.89061e-11	4.75877e-16	0.763491	0.292	0.193	1.21758e-11
AP1S1	5.9611e-48	0.561281	8.79477e-64	0.638284	0.94	0.814	2.25023e-59	2.32983e-52	0.561281	0.936	0.822	5.9611e-48	3.90297e-58	0.614033	0.893	0.762	9.98615e-54
FTL	1.88197e-76	0.560866	7.35546e-81	0.560866	1	0.991	1.88197e-76	5.43177e-141	0.755774	1	0.998	1.38977e-136	6.94405e-197	0.81367	1	0.996	1.77671e-192
CHMP2A	4.52685e-33	0.557712	1.76927e-37	0.557712	0.843	0.704	4.52685e-33	9.77933e-40	0.574902	0.852	0.724	2.50214e-35	6.36001e-43	0.66604	0.748	0.603	1.62727e-38
IDH2	4.20171e-51	0.556693	2.94915e-99	0.735524	0.977	0.906	7.54569e-95	1.64219e-55	0.556693	0.954	0.884	4.20171e-51	1.64066e-69	0.746377	0.902	0.789	4.19779e-65
MRPS12	2.5069e-27	0.555486	9.79792e-32	0.557258	0.813	0.665	2.5069e-27	6.73102e-37	0.555486	0.839	0.715	1.7222e-32	4.51361e-39	0.596904	0.759	0.608	1.15485e-34
ROMO1	1.11081e-34	0.553473	2.71145e-44	0.583752	0.889	0.745	6.93752e-40	6.76031e-53	0.642938	0.869	0.706	1.72969e-48	4.34148e-39	0.553473	0.798	0.65	1.11081e-34
NQO1	1.43371e-90	0.546718	5.60351e-95	0.548937	0.999	0.992	1.43371e-90	8.81517e-113	0.611584	0.999	0.997	2.25545e-108	3.75961e-105	0.546718	0.999	0.993	9.61934e-101
MRPL12	3.05865e-31	0.544824	4.17596e-38	0.629583	0.789	0.623	1.06846e-33	1.19544e-35	0.544824	0.828	0.682	3.05865e-31	1.97994e-36	0.571403	0.78	0.639	5.06587e-32
ST6GALNAC4	0.000312786	0.543266	1.22249e-08	0.543266	0.336	0.255	0.000312786	2.03246e-09	0.550581	0.351	0.265	5.20026e-05	2.36627e-17	0.740021	0.331	0.224	6.05434e-13
AK1	1.3815e-33	0.536096	1.5621e-42	0.606936	0.878	0.738	3.99678e-38	5.39943e-38	0.536096	0.865	0.754	1.3815e-33	1.95203e-59	0.659069	0.858	0.694	4.99445e-55
MCRIP2	7.39678e-32	0.53503	2.89498e-38	0.538429	0.894	0.785	7.4071e-34	5.32864e-43	0.549445	0.905	0.776	1.36339e-38	2.89095e-36	0.53503	0.792	0.644	7.39678e-32
TIMM8B	3.2955e-14	0.533953	1.15822e-24	0.538024	0.7	0.548	2.96341e-20	1.71943e-37	0.625674	0.749	0.588	4.39933e-33	1.28801e-18	0.533953	0.6	0.499	3.2955e-14
NOP10	1.16419e-50	0.533217	5.68905e-59	0.556326	0.966	0.872	1.4556e-54	4.32236e-59	0.533217	0.961	0.89	1.10592e-54	4.5501e-55	0.551389	0.919	0.805	1.16419e-50
CDA	7.52518e-41	0.531543	1.37794e-46	0.531543	0.657	0.394	3.5256e-42	5.49823e-66	0.980518	0.598	0.317	1.40678e-61	2.94113e-45	0.938757	0.565	0.385	7.52518e-41
RAB5IF	4.07785e-44	0.530676	1.59378e-48	0.530676	0.968	0.873	4.07785e-44	5.01426e-75	0.616829	0.963	0.899	1.28295e-70	7.88188e-68	0.544577	0.959	0.872	2.01666e-63
TMEM208	1.08063e-17	0.525629	4.22353e-22	0.525629	0.638	0.497	1.08063e-17	5.41543e-28	0.561281	0.709	0.554	1.38559e-23	1.19693e-23	0.581437	0.587	0.467	3.06245e-19
CLDN3	1.31733e-43	0.524991	3.40517e-51	0.627647	0.881	0.712	8.71248e-47	6.01493e-51	0.624898	0.866	0.704	1.53898e-46	5.14863e-48	0.524991	0.92	0.821	1.31733e-43
SMIM31	1.70517e-25	0.515018	2.25039e-33	0.515018	0.815	0.651	5.75785e-29	2.05987e-32	0.525111	0.75	0.562	5.27039e-28	6.66446e-30	0.580075	0.641	0.485	1.70517e-25
PRDX5	5.91373e-59	0.505492	2.31131e-63	0.505492	0.995	0.957	5.91373e-59	7.14366e-78	0.545463	0.997	0.966	1.82778e-73	6.58001e-74	0.519729	0.99	0.943	1.68356e-69
LGALS4	2.38427e-79	0.504567	2.36882e-100	0.599917	1	0.99	6.06086e-96	9.31865e-84	0.504567	1	0.993	2.38427e-79	1.93954e-171	0.88904	0.997	0.967	4.9625e-167
FIS1	4.12721e-39	0.502295	5.19254e-52	0.628609	0.905	0.765	1.32856e-47	1.61307e-43	0.502295	0.915	0.804	4.12721e-39	8.15965e-51	0.590358	0.858	0.71	2.08773e-46

## Sheet: Cluster_1
GENE	max.adj.pval	min.log2FC	IKK_ko_p_val	IKK_ko_avg_log2FC	IKK_ko_pct.1	IKK_ko_pct.2	IKK_ko_p_val_adj	IKK_ko_CLD_inh_p_val	IKK_ko_CLD_inh_avg_log2FC	IKK_ko_CLD_inh_pct.1	IKK_ko_CLD_inh_pct.2	IKK_ko_CLD_inh_p_val_adj	WT_p_val	WT_avg_log2FC	WT_pct.1	WT_pct.2	WT_p_val_adj
PTCHD4	1.84572e-208	2.39844	7.21378e-213	2.48209	0.907	0.375	1.84572e-208	6.1812e-220	2.39844	0.927	0.421	1.58152e-215	0	2.47967	0.869	0.348	0
AL353138.1	4.87476e-185	2.20004	6.68223e-206	2.42099	0.868	0.317	1.70971e-201	1.90524e-189	2.20004	0.868	0.37	4.87476e-185	2.54335e-266	2.23902	0.819	0.305	6.50742e-262
AC093866.1	1.16413e-150	2.08074	1.68697e-170	2.23904	0.781	0.247	4.31628e-166	4.54986e-155	2.14469	0.722	0.242	1.16413e-150	6.89507e-208	2.08074	0.712	0.247	1.76417e-203
TRIM22	3.38917e-79	1.86065	2.0442e-102	2.06542	0.556	0.172	5.2303e-98	3.68625e-121	2.08394	0.579	0.174	9.43165e-117	1.32462e-83	1.86065	0.362	0.118	3.38917e-79
PURPL	1.15634e-144	1.80773	5.72104e-150	1.80773	0.963	0.683	1.46378e-145	4.51944e-149	1.90117	0.944	0.672	1.15634e-144	4.59094e-248	1.82199	0.971	0.79	1.17464e-243
LINC02832	2.4114e-23	1.57382	9.42469e-28	1.8356	0.307	0.135	2.4114e-23	5.1575e-33	1.77819	0.334	0.148	1.3196e-28	1.27426e-42	1.57382	0.361	0.175	3.26032e-38
SPATA18	3.41213e-80	1.54627	1.33359e-84	1.54627	0.712	0.345	3.41213e-80	1.08427e-97	1.55074	0.727	0.344	2.77422e-93	1.50819e-88	1.612	0.513	0.227	3.85886e-84
ZMAT3	5.16453e-117	1.47152	2.61984e-131	1.71756	0.907	0.618	6.70312e-127	2.0185e-121	1.56659	0.893	0.639	5.16453e-117	3.03552e-136	1.47152	0.837	0.564	7.76669e-132
DEC1	9.04628e-21	1.40499	1.22282e-39	1.76492	0.298	0.103	3.12871e-35	3.53564e-25	1.60322	0.255	0.11	9.04628e-21	3.64394e-36	1.40499	0.33	0.166	9.32339e-32
MIR34AHG	9.17657e-81	1.24661	3.58656e-85	1.42815	0.781	0.433	9.17657e-81	2.37844e-98	1.41485	0.831	0.465	6.08548e-94	7.04334e-90	1.24661	0.714	0.427	1.80211e-85
SRGAP3	8.08967e-40	1.22635	3.16176e-44	1.22635	0.627	0.369	8.08967e-40	8.53016e-54	1.2439	0.666	0.377	2.18253e-49	9.33766e-57	1.31064	0.525	0.291	2.38913e-52
AC019211.1	4.81646e-27	1.21176	2.1136e-46	1.7174	0.403	0.159	5.40786e-42	1.15907e-32	1.61846	0.368	0.175	2.96559e-28	1.88246e-31	1.21176	0.387	0.22	4.81646e-27
MDM2	1.84097e-118	1.19131	7.19522e-123	1.39421	0.983	0.921	1.84097e-118	1.95696e-136	1.38749	0.994	0.938	5.00708e-132	1.77457e-144	1.19131	0.978	0.92	4.5404e-140
MCC	5.54535e-90	1.18962	1.60379e-118	1.98283	0.745	0.303	4.10346e-114	6.84897e-112	1.76138	0.766	0.37	1.75238e-107	2.16734e-94	1.18962	0.79	0.524	5.54535e-90
PSTPIP2	4.42861e-29	1.14978	5.76284e-54	1.22599	0.685	0.389	1.47448e-49	1.92256e-41	1.16923	0.64	0.402	4.91907e-37	1.73087e-33	1.14978	0.433	0.262	4.42861e-29
CCDC148	1.38122e-12	1.11221	5.39833e-17	1.14624	0.369	0.217	1.38122e-12	8.2458e-27	1.23894	0.398	0.21	2.10977e-22	2.55281e-37	1.11221	0.569	0.393	6.53161e-33
CDKN1A	1.50445e-52	1.1108	2.56609e-69	1.33963	0.774	0.481	6.56561e-65	2.42321e-77	1.34601	0.78	0.475	6.20001e-73	5.87997e-57	1.1108	0.595	0.364	1.50445e-52
FDXR	3.78776e-22	1.0878	2.78405e-37	1.32178	0.398	0.173	7.12328e-33	4.27917e-50	1.43128	0.441	0.186	1.09487e-45	1.4804e-26	1.0878	0.261	0.129	3.78776e-22
TNFAIP2	2.95693e-18	1.06098	2.53121e-31	1.28875	0.4	0.196	6.47636e-27	6.42633e-31	1.32512	0.387	0.191	1.64424e-26	1.15568e-22	1.06098	0.323	0.193	2.95693e-18
RARRES1	1.03412e-28	1.05555	4.04172e-33	1.70906	0.752	0.598	1.03412e-28	2.39565e-36	1.79748	0.725	0.533	6.12951e-32	1.34609e-52	1.05555	0.735	0.538	3.44409e-48
LRATD1	2.68743e-25	1.03619	1.88131e-31	1.0924	0.642	0.434	4.81352e-27	2.90972e-39	1.09915	0.666	0.441	7.44482e-35	1.05035e-29	1.03619	0.468	0.307	2.68743e-25
MAPK10	4.37013e-12	1.01697	1.70802e-16	1.08657	0.371	0.223	4.37013e-12	9.43422e-21	1.01697	0.376	0.214	2.41384e-16	2.15822e-28	1.21196	0.343	0.194	5.52203e-24
ARHGAP24	7.60538e-23	1.01696	2.97248e-27	1.11822	0.55	0.348	7.60538e-23	1.03071e-38	1.1789	0.621	0.381	2.63716e-34	4.51894e-41	1.01696	0.579	0.387	1.15621e-36
DDB2	1.33952e-57	1.00087	2.32735e-71	1.15403	0.833	0.567	5.95475e-67	5.23538e-62	1.0167	0.815	0.556	1.33952e-57	4.53907e-72	1.00087	0.744	0.476	1.16137e-67
RRM2B	6.71889e-44	0.995507	1.02178e-76	1.38418	0.826	0.558	2.61432e-72	3.45375e-56	1.16822	0.776	0.554	8.83677e-52	2.626e-48	0.995507	0.691	0.516	6.71889e-44
LINC02331	9.58548e-33	0.983795	4.58514e-68	1.68098	0.658	0.332	1.17316e-63	1.99506e-76	1.62442	0.683	0.356	5.10456e-72	3.74638e-37	0.983795	0.622	0.45	9.58548e-33
PLK2	8.0424e-78	0.978865	7.54958e-97	1.62288	0.855	0.549	1.93164e-92	3.52526e-92	1.48067	0.862	0.593	9.01974e-88	3.14328e-82	0.978865	0.851	0.679	8.0424e-78
DRAM1	1.49964e-21	0.94526	4.97093e-68	1.67863	0.57	0.247	1.27186e-63	1.04448e-47	1.35123	0.539	0.279	2.67242e-43	5.86119e-26	0.94526	0.411	0.257	1.49964e-21
PRDM1	1.19631e-20	0.934584	8.16e-45	1.54321	0.371	0.139	2.08782e-40	4.36517e-40	1.60002	0.342	0.139	1.11687e-35	4.67564e-25	0.934584	0.339	0.196	1.19631e-20
LINC01913	3.299e-09	0.931096	1.28938e-13	1.11795	0.277	0.157	3.299e-09	3.72675e-15	0.931096	0.252	0.132	9.53527e-11	6.18536e-17	0.955068	0.306	0.194	1.58259e-12
NEK11	2.07031e-15	0.921533	3.0612e-22	1.14528	0.459	0.28	7.83239e-18	4.65348e-21	1.11127	0.443	0.281	1.19064e-16	8.09156e-20	0.921533	0.43	0.297	2.07031e-15
GRIN2B	2.90665e-15	0.915169	1.83443e-21	0.915169	0.459	0.274	4.69358e-17	1.13603e-19	0.949811	0.449	0.286	2.90665e-15	6.19745e-37	0.972599	0.547	0.35	1.58568e-32
GLIS3	1.89108e-75	0.883949	7.39107e-80	0.9653	0.987	0.927	1.89108e-75	2.34085e-93	0.978663	0.989	0.919	5.9893e-89	6.76569e-116	0.883949	0.995	0.949	1.73107e-111
AC027117.2	8.53407e-10	0.875439	1.71689e-15	0.907903	0.484	0.337	4.39283e-11	3.33544e-14	0.875439	0.495	0.36	8.53407e-10	5.20625e-26	0.949736	0.445	0.294	1.33207e-21
RUNX2	3.53117e-32	0.863092	1.18645e-54	1.52801	0.602	0.311	3.03565e-50	4.5908e-70	1.52217	0.66	0.34	1.1746e-65	1.38012e-36	0.863092	0.602	0.417	3.53117e-32
TNFSF9	3.12154e-30	0.863043	2.75565e-44	1.02646	0.695	0.43	7.05061e-40	1.45583e-43	0.974435	0.696	0.441	3.72489e-39	1.22002e-34	0.863043	0.503	0.315	3.12154e-30
AC093865.1	1.41168e-14	0.861318	5.51741e-19	0.861318	0.536	0.357	1.41168e-14	1.69858e-24	1.20202	0.497	0.321	4.34599e-20	6.36256e-34	1.06196	0.55	0.372	1.62792e-29
PGM2L1	1.09298e-15	0.85942	9.47748e-29	0.947325	0.664	0.457	2.42491e-24	4.2718e-20	0.85942	0.629	0.465	1.09298e-15	3.14146e-48	0.927346	0.646	0.429	8.03773e-44
ADAMTS14	1.55309e-24	0.85715	1.79983e-30	1.65784	0.29	0.116	4.60506e-26	3.98564e-35	1.48441	0.328	0.137	1.01977e-30	6.07009e-29	0.85715	0.424	0.252	1.55309e-24
EVA1C	9.8147e-28	0.854205	3.83597e-32	1.24121	0.597	0.387	9.8147e-28	1.82407e-33	1.08588	0.658	0.446	4.66705e-29	6.25142e-43	0.854205	0.745	0.573	1.59949e-38
RGL1	3.04492e-23	0.829685	1.19007e-27	1.11778	0.518	0.307	3.04492e-23	1.85975e-30	1.02632	0.568	0.349	4.75837e-26	3.60514e-44	0.829685	0.685	0.465	9.22411e-40
TRANK1	3.80334e-12	0.827436	1.65918e-31	1.14719	0.442	0.222	4.24519e-27	2.65998e-28	1.11015	0.416	0.22	6.80583e-24	1.48649e-16	0.827436	0.308	0.196	3.80334e-12
ASTN2	9.19305e-17	0.825327	4.67262e-24	1.09265	0.474	0.289	1.19554e-19	2.0354e-39	1.21647	0.557	0.311	5.20776e-35	3.593e-21	0.825327	0.455	0.32	9.19305e-17
INPP4B	6.87242e-77	0.821525	2.68601e-81	0.918144	0.992	0.95	6.87242e-77	3.3216e-82	1.00296	0.984	0.945	8.49864e-78	2.57044e-143	0.821525	0.995	0.975	6.57674e-139
MGAT5	3.56573e-66	0.821497	1.04085e-72	1.01136	0.998	0.994	2.66313e-68	1.39362e-70	0.91294	0.997	0.995	3.56573e-66	2.03443e-104	0.821497	0.999	0.999	5.2053e-100
FAM169A	5.01679e-69	0.819619	1.27135e-77	0.971786	0.958	0.839	3.25287e-73	1.60314e-73	0.951258	0.943	0.847	4.10179e-69	1.96076e-73	0.819619	0.905	0.795	5.01679e-69
GDF15	1.10437e-52	0.818907	4.57898e-77	1.14826	0.922	0.691	1.17158e-72	4.31631e-57	0.878269	0.924	0.761	1.10437e-52	2.05832e-70	0.818907	0.891	0.749	5.26641e-66
PCDH7	7.71419e-58	0.809452	6.77728e-98	1.48068	0.917	0.681	1.73403e-93	1.79055e-102	1.31856	0.949	0.767	4.58131e-98	3.015e-62	0.809452	0.909	0.784	7.71419e-58
AC007906.2	5.12777e-19	0.806093	6.75861e-40	1.05432	0.619	0.361	1.72926e-35	2.00413e-23	0.806093	0.57	0.37	5.12777e-19	8.31221e-61	1.21644	0.599	0.363	2.12676e-56
PTPN14	1.36984e-47	0.79928	5.35388e-52	0.892676	0.926	0.794	1.36984e-47	6.3578e-53	0.909338	0.925	0.782	1.62671e-48	2.15219e-80	0.79928	0.947	0.878	5.5066e-76
RGCC	1.64776e-10	0.784815	7.60466e-19	1.11982	0.317	0.165	1.94573e-14	1.84145e-15	1.08969	0.252	0.132	4.71154e-11	6.44009e-15	0.784815	0.289	0.185	1.64776e-10
CNTNAP3B	1.26315e-07	0.783661	3.26788e-18	1.29995	0.253	0.122	8.3612e-14	5.57511e-21	1.28552	0.276	0.136	1.42645e-16	4.93688e-12	0.783661	0.257	0.168	1.26315e-07
CELF2	2.56769e-18	0.783427	5.23084e-44	1.28105	0.545	0.279	1.33836e-39	6.29221e-39	1.13463	0.576	0.336	1.60992e-34	1.00355e-22	0.783427	0.504	0.355	2.56769e-18
OSBPL3	1.22399e-139	0.781522	4.78383e-144	1.10192	0.997	0.972	1.22399e-139	1.30975e-149	1.07425	0.995	0.971	3.35113e-145	4.41972e-153	0.781522	0.996	0.982	1.13083e-148
AC016745.1	5.14838e-19	0.778816	2.01219e-23	0.984635	0.459	0.265	5.14838e-19	5.53807e-27	1.00289	0.457	0.258	1.41697e-22	4.50687e-25	0.778816	0.509	0.352	1.15313e-20
TIGAR	4.65624e-25	0.778479	2.37096e-31	0.978461	0.685	0.481	6.06634e-27	6.83411e-38	0.910192	0.739	0.54	1.74858e-33	1.81984e-29	0.778479	0.63	0.489	4.65624e-25
LRMDA	7.33712e-08	0.778286	1.14497e-18	1.1158	0.43	0.268	2.92952e-14	2.86763e-12	0.788572	0.484	0.363	7.33712e-08	2.0733e-13	0.778286	0.354	0.25	5.30474e-09
FRMD4A	3.93927e-10	0.775162	1.01827e-18	0.945589	0.314	0.161	2.60533e-14	1.53962e-14	0.886702	0.286	0.162	3.93927e-10	2.2255e-16	0.775162	0.28	0.171	5.69415e-12
CELSR2	1.3425e-13	0.766969	3.33778e-22	0.965141	0.41	0.229	8.54004e-18	3.9803e-26	0.993362	0.418	0.229	1.0184e-21	5.24702e-18	0.766969	0.371	0.247	1.3425e-13
FAM155A	3.9752e-34	0.761608	2.5159e-40	0.8684	0.875	0.735	6.43718e-36	1.55366e-38	0.761608	0.899	0.741	3.9752e-34	1.10727e-49	0.808635	0.83	0.653	2.83306e-45
ARSG	4.6741e-05	0.757178	4.40907e-16	0.990628	0.346	0.202	1.1281e-11	1.82682e-09	0.757178	0.346	0.241	4.6741e-05	8.65819e-15	0.76799	0.389	0.278	2.21528e-10
POLH	5.96489e-19	0.750957	3.69651e-25	0.852504	0.573	0.375	9.4579e-21	7.662e-30	0.864237	0.598	0.378	1.9604e-25	2.33131e-23	0.750957	0.497	0.35	5.96489e-19
CFAP70	5.5887e-05	0.748884	2.18428e-09	0.748884	0.3	0.195	5.5887e-05	1.44349e-13	0.813417	0.37	0.239	3.69331e-09	2.42568e-16	0.904353	0.348	0.232	6.20634e-12
KIFC3	1.44763e-17	0.744028	2.49606e-28	0.872483	0.68	0.489	6.38642e-24	5.65792e-22	0.871535	0.607	0.447	1.44763e-17	8.21892e-36	0.744028	0.731	0.593	2.10289e-31
MICALL1	4.09968e-11	0.743719	2.24503e-33	1.09965	0.486	0.252	5.74414e-29	2.22382e-21	0.911302	0.429	0.258	5.68988e-17	1.60231e-15	0.743719	0.344	0.231	4.09968e-11
DIO3OS	7.10789e-11	0.739883	1.08062e-30	1.24763	0.42	0.212	2.76487e-26	2.05457e-36	1.3022	0.415	0.197	5.25681e-32	2.77804e-15	0.739883	0.324	0.211	7.10789e-11
NEAT1	7.41861e-89	0.739706	2.79975e-102	0.983228	1	1	7.16344e-98	7.69049e-100	0.918819	0.998	0.999	1.96769e-95	2.89948e-93	0.739706	1	0.999	7.41861e-89
CA3	2.488e-08	0.732885	1.7388e-13	0.732885	0.482	0.347	4.44889e-09	9.72406e-13	0.763593	0.452	0.322	2.488e-08	3.65832e-20	0.748995	0.509	0.377	9.36017e-16
BBS9	1.32961e-12	0.732492	5.19665e-17	0.86218	0.546	0.389	1.32961e-12	1.68284e-17	0.732492	0.616	0.458	4.30571e-13	8.28462e-23	0.735395	0.615	0.487	2.1197e-18
TNFSF15	3.60932e-18	0.725166	2.80166e-36	1.03245	0.654	0.415	7.16832e-32	2.26962e-35	1.0438	0.616	0.389	5.80704e-31	1.41066e-22	0.725166	0.619	0.479	3.60932e-18
BAX	4.11323e-54	0.723587	1.72099e-59	0.769713	0.948	0.866	4.40334e-55	1.60761e-58	0.723587	0.958	0.877	4.11323e-54	6.07785e-64	0.742224	0.883	0.791	1.55508e-59
NABP1	9.29477e-32	0.721795	2.05675e-36	1.22326	0.624	0.394	5.26239e-32	2.71586e-48	1.36424	0.657	0.404	6.9488e-44	3.63276e-36	0.721795	0.732	0.583	9.29477e-32
FAS	4.67959e-20	0.718027	1.16217e-27	0.869391	0.627	0.431	2.97353e-23	1.3545e-27	0.84417	0.629	0.431	3.46563e-23	1.82896e-24	0.718027	0.528	0.373	4.67959e-20
SMARCA1	1.86057e-07	0.712494	5.37219e-18	0.955551	0.393	0.231	1.37453e-13	7.27184e-12	0.8723	0.311	0.197	1.86057e-07	5.49472e-13	0.712494	0.321	0.221	1.40588e-08
PVT1	2.95034e-104	0.708579	4.13769e-130	1.2002	0.993	0.902	1.05867e-125	3.13816e-115	0.946353	0.998	0.943	8.02931e-111	1.15311e-108	0.708579	0.996	0.968	2.95034e-104
ZBTB7C	7.22039e-37	0.701721	2.82201e-41	0.794471	0.939	0.856	7.22039e-37	5.36474e-45	0.741516	0.963	0.868	1.37262e-40	3.59253e-57	0.701721	0.914	0.813	9.19186e-53
BBC3	1.49907e-10	0.700763	1.78432e-30	0.916818	0.572	0.343	4.56536e-26	7.05767e-30	0.949016	0.553	0.343	1.80578e-25	5.85893e-15	0.700763	0.375	0.263	1.49907e-10
PRKY	6.57124e-40	0.69414	2.23961e-65	1.00217	0.889	0.724	5.73027e-61	2.56829e-44	0.776757	0.882	0.742	6.57124e-40	1.82492e-48	0.69414	0.824	0.679	4.66925e-44
DCP1B	5.02613e-09	0.693376	2.03124e-18	0.748442	0.477	0.302	5.19713e-14	1.15093e-13	0.693376	0.422	0.284	2.94478e-09	1.96441e-13	0.703505	0.359	0.254	5.02613e-09
SYT1	2.1591e-55	0.691633	7.47836e-74	1.11986	0.944	0.819	1.91341e-69	8.43859e-60	0.934775	0.939	0.829	2.1591e-55	3.62878e-69	0.691633	0.969	0.906	9.2846e-65
SLC16A10	6.50142e-11	0.686242	2.54101e-15	0.807314	0.497	0.342	6.50142e-11	1.7504e-18	0.767524	0.557	0.385	4.47858e-14	3.1295e-19	0.686242	0.537	0.4	8.00715e-15
BTG2	1.41856e-10	0.679427	1.60927e-26	0.848571	0.562	0.346	4.11749e-22	5.25641e-27	0.92827	0.528	0.324	1.3449e-22	5.54429e-15	0.679427	0.417	0.298	1.41856e-10
CRPPA	4.7796e-05	0.676702	4.49445e-11	0.882234	0.349	0.236	1.14995e-06	1.86805e-09	0.816247	0.391	0.284	4.7796e-05	1.36423e-12	0.676702	0.353	0.251	3.49052e-08
CHST15	1.70922e-27	0.676009	4.19248e-40	1.14785	0.567	0.31	1.07269e-35	6.68028e-32	1.29038	0.539	0.324	1.70922e-27	2.69025e-35	0.676009	0.807	0.674	6.88327e-31
EPB41L4A	5.92835e-26	0.667025	2.67574e-35	0.713436	0.912	0.795	6.84615e-31	2.31703e-30	0.671359	0.893	0.812	5.92835e-26	6.70554e-49	0.667025	0.89	0.72	1.71568e-44
TLE4	7.76858e-09	0.661293	3.03626e-13	0.815634	0.379	0.242	7.76858e-09	2.01759e-18	1.18006	0.398	0.248	5.16221e-14	3.99986e-14	0.661293	0.432	0.318	1.0234e-09
CUEDC1	2.9182e-12	0.660102	1.14054e-16	0.706217	0.691	0.566	2.9182e-12	1.49739e-20	0.660102	0.722	0.575	3.83122e-16	8.53827e-42	0.686173	0.819	0.678	2.1846e-37
IKZF2	8.39514e-14	0.659783	3.28114e-18	0.659783	0.755	0.613	8.39514e-14	3.52805e-25	0.853177	0.716	0.558	9.02686e-21	4.52894e-33	0.704068	0.764	0.61	1.15877e-28
ASCC3	6.03205e-60	0.659546	5.95184e-74	0.85557	0.99	0.928	1.52284e-69	2.35756e-64	0.753339	0.978	0.947	6.03205e-60	2.12322e-74	0.659546	0.973	0.945	5.43246e-70
EDN1	9.82228e-11	0.655999	1.68383e-16	0.779308	0.366	0.21	4.30824e-12	3.83893e-15	0.894921	0.29	0.164	9.82228e-11	1.34299e-16	0.655999	0.442	0.314	3.43617e-12
FGFR2	1.36846e-11	0.65573	5.34848e-16	0.699102	0.56	0.399	1.36846e-11	3.17201e-26	0.844287	0.646	0.455	8.11591e-22	1.94671e-20	0.65573	0.51	0.367	4.98086e-16
SMOC1	3.44223e-21	0.654269	7.63655e-29	0.691284	0.815	0.671	1.95389e-24	1.34536e-25	0.683921	0.807	0.682	3.44223e-21	7.64884e-39	0.654269	0.827	0.711	1.95703e-34
PTPRU	1.65589e-16	0.652678	4.52973e-26	1.02473	0.445	0.245	1.15898e-21	1.43207e-22	0.927561	0.432	0.252	3.66409e-18	6.47184e-21	0.652678	0.431	0.28	1.65589e-16
IKBIP	5.0913e-08	0.65251	7.97435e-23	0.860012	0.511	0.317	2.04032e-18	2.90995e-25	0.903878	0.505	0.309	7.4454e-21	1.98988e-12	0.65251	0.367	0.265	5.0913e-08
AMOT	3.52958e-05	0.649944	8.64492e-13	0.803814	0.366	0.235	2.21189e-08	1.3795e-09	0.684538	0.325	0.22	3.52958e-05	2.99062e-12	0.649944	0.325	0.226	7.65181e-08
MUC20	4.62238e-18	0.642525	1.7975e-26	0.750729	0.732	0.563	4.59908e-22	1.8066e-22	0.654712	0.761	0.607	4.62238e-18	6.16657e-30	0.642525	0.713	0.571	1.57778e-25
CALCOCO1	1.54795e-15	0.635636	6.04998e-20	0.635636	0.607	0.418	1.54795e-15	4.72792e-23	0.832066	0.53	0.345	1.20969e-18	1.69382e-23	0.747838	0.463	0.309	4.3338e-19
RASSF5	8.27651e-10	0.631995	2.26671e-31	0.983274	0.565	0.332	5.79959e-27	4.81261e-20	0.784993	0.531	0.354	1.23136e-15	3.23478e-14	0.631995	0.407	0.294	8.27651e-10
ANXA6	5.60499e-15	0.63168	5.4671e-33	1.06874	0.523	0.282	1.39881e-28	7.77497e-24	1.0164	0.458	0.275	1.9893e-19	2.19065e-19	0.63168	0.482	0.339	5.60499e-15
MBOAT2	3.54175e-19	0.631619	4.62722e-31	0.954545	0.703	0.491	1.18392e-26	1.38425e-23	0.747022	0.699	0.529	3.54175e-19	1.80821e-27	0.631619	0.771	0.676	4.62648e-23
ARHGEF17	0.000270782	0.628517	1.05832e-08	0.641906	0.341	0.234	0.000270782	8.55898e-09	0.680087	0.307	0.209	0.00021899	5.8623e-12	0.628517	0.355	0.255	1.49993e-07
LYRM1	1.2413e-13	0.627583	4.85149e-18	0.736461	0.587	0.416	1.2413e-13	9.76616e-20	0.752611	0.599	0.432	2.49877e-15	3.51292e-19	0.627583	0.587	0.455	8.98815e-15
TEX9	6.36789e-06	0.627375	2.48882e-10	0.663473	0.553	0.447	6.36789e-06	1.14783e-12	0.640141	0.592	0.47	2.93684e-08	2.0889e-14	0.627375	0.511	0.4	5.34466e-10
ENC1	9.56339e-26	0.627317	3.23728e-30	0.72635	0.867	0.75	8.28291e-26	3.73774e-30	0.667218	0.873	0.755	9.56339e-26	2.04955e-36	0.627317	0.866	0.778	5.24399e-32
LAMC1	1.8325e-34	0.620428	6.46836e-45	0.899591	0.904	0.764	1.655e-40	7.1621e-39	0.812241	0.896	0.747	1.8325e-34	5.87367e-39	0.620428	0.872	0.783	1.50284e-34
TNS3	2.10601e-24	0.619708	3.17845e-29	0.661024	0.894	0.797	8.13239e-25	8.2311e-29	0.619708	0.894	0.812	2.10601e-24	3.28262e-56	0.637609	0.94	0.862	8.39892e-52
DYNC2H1	0.00340014	0.618254	1.32891e-07	0.667451	0.255	0.166	0.00340014	3.62991e-09	0.822997	0.293	0.197	9.28748e-05	2.20016e-10	0.618254	0.327	0.235	5.62932e-06
ARHGEF28	9.68292e-28	0.617069	2.03296e-35	0.664138	0.941	0.828	5.20152e-31	3.78446e-32	0.617069	0.925	0.836	9.68292e-28	4.70753e-47	0.649758	0.879	0.765	1.20447e-42
FRAS1	1.69731e-21	0.617026	1.50408e-35	1.05979	0.781	0.59	3.84833e-31	6.63373e-26	0.879494	0.775	0.655	1.69731e-21	1.07067e-33	0.617026	0.867	0.768	2.73943e-29
KLHL5	4.76009e-10	0.615208	1.86043e-14	0.867263	0.435	0.288	4.76009e-10	7.15148e-16	0.806642	0.472	0.325	1.82978e-11	6.38881e-15	0.615208	0.459	0.342	1.63464e-10
PLSCR2	1.77841e-05	0.613787	1.22343e-16	0.939645	0.398	0.246	3.13027e-12	2.07936e-20	0.913676	0.402	0.237	5.32025e-16	6.95071e-10	0.613787	0.325	0.235	1.77841e-05
CTIF	1.62648e-15	0.612781	4.42624e-32	0.940474	0.637	0.412	1.1325e-27	6.35691e-20	0.715419	0.595	0.434	1.62648e-15	5.8197e-23	0.612781	0.615	0.47	1.48903e-18
ANXA1	3.04315e-15	0.611844	1.18938e-19	0.616913	0.862	0.749	3.04315e-15	7.46897e-23	0.6412	0.891	0.826	1.91101e-18	3.11564e-36	0.611844	0.957	0.906	7.97168e-32
PRR5L	0.00403539	0.61137	7.15556e-12	0.869259	0.322	0.202	1.83082e-07	1.57719e-07	0.61137	0.275	0.186	0.00403539	7.20959e-19	0.782762	0.348	0.219	1.84465e-14
NXN	2.0254e-45	0.607659	5.24703e-58	1.02689	0.911	0.748	1.3425e-53	7.83479e-62	0.941093	0.919	0.755	2.00461e-57	7.91605e-50	0.607659	0.938	0.846	2.0254e-45
FUCA1	4.04189e-14	0.605424	8.67573e-25	0.748192	0.668	0.481	2.21977e-20	1.89278e-19	0.605424	0.665	0.492	4.84286e-15	1.57973e-18	0.670096	0.527	0.405	4.04189e-14
LINC02340	0.00247921	0.605197	2.3522e-10	0.760602	0.265	0.158	6.01835e-06	9.68971e-08	0.677599	0.264	0.177	0.00247921	1.70414e-08	0.605197	0.269	0.193	0.000436022
PLEKHS1	2.12165e-20	0.602555	8.29222e-25	0.602555	0.87	0.733	2.12165e-20	4.43027e-31	0.696749	0.854	0.714	1.13353e-26	7.60197e-69	0.828391	0.914	0.773	1.94504e-64
ABCC4	3.0881e-11	0.601711	2.06036e-24	0.909271	0.604	0.412	5.27164e-20	1.20695e-15	0.619038	0.623	0.485	3.0881e-11	9.10062e-29	0.601711	0.801	0.698	2.32848e-24
APOBEC3C	2.17627e-08	0.596724	9.85871e-27	0.957027	0.562	0.362	2.52245e-22	9.45069e-24	0.876346	0.551	0.372	2.41805e-19	8.5057e-13	0.596724	0.447	0.344	2.17627e-08
EPDR1	0.00426707	0.596709	1.66774e-07	0.628083	0.376	0.282	0.00426707	4.64853e-08	0.704146	0.388	0.293	0.00118937	1.80323e-10	0.596709	0.405	0.314	4.61374e-06
KIAA1217	2.92417e-39	0.596348	1.14288e-43	0.697306	0.975	0.933	2.92417e-39	9.32373e-60	0.767604	0.984	0.935	2.38557e-55	1.7009e-56	0.596348	0.965	0.901	4.35191e-52
PHLDA3	5.00699e-18	0.593734	2.48791e-40	0.933318	0.742	0.51	6.36556e-36	3.45184e-32	0.798451	0.73	0.525	8.83188e-28	1.95693e-22	0.593734	0.599	0.459	5.00699e-18
MAST4	2.8995e-16	0.592607	7.91534e-28	0.850482	0.658	0.44	2.02522e-23	6.84333e-25	0.771375	0.627	0.435	1.75094e-20	1.13324e-20	0.592607	0.594	0.462	2.8995e-16
UTRN	4.45326e-50	0.58795	1.74051e-54	0.768508	0.97	0.852	4.45326e-50	1.27249e-57	0.705105	0.958	0.881	3.25579e-53	1.01127e-75	0.58795	0.987	0.935	2.58743e-71
LINC01091	6.02001e-06	0.5879	1.28918e-13	0.862484	0.58	0.454	3.29849e-09	2.35285e-10	0.5879	0.557	0.447	6.02001e-06	4.86926e-18	0.636284	0.631	0.515	1.24585e-13
MCTP1	1.95376e-07	0.587682	7.63604e-12	0.893546	0.435	0.312	1.95376e-07	1.46145e-14	0.837237	0.579	0.449	3.73927e-10	7.77535e-13	0.587682	0.55	0.452	1.9894e-08
SIPA1L2	1.88999e-26	0.584527	2.9407e-32	0.860796	0.788	0.631	7.52409e-28	7.38683e-31	0.810218	0.784	0.632	1.88999e-26	8.26745e-34	0.584527	0.879	0.757	2.11531e-29
PROM2	1.03831e-08	0.584288	4.0581e-13	0.610967	0.541	0.393	1.03831e-08	2.40283e-18	0.71167	0.548	0.382	6.14789e-14	9.39531e-17	0.584288	0.461	0.33	2.40388e-12
AXIN2	0.0269191	0.584181	1.0521e-06	0.65015	0.298	0.209	0.0269191	2.95035e-10	0.584181	0.337	0.22	7.54875e-06	1.42772e-13	0.675936	0.304	0.2	3.65297e-09
TCP11L1	7.94627e-07	0.583561	4.38016e-13	0.611825	0.494	0.347	1.12071e-08	3.10571e-11	0.616598	0.477	0.354	7.94627e-07	3.32296e-13	0.583561	0.42	0.312	8.50212e-09
AC090015.1	4.48758e-06	0.583225	7.63937e-16	0.911122	0.477	0.322	1.95461e-11	1.75392e-10	0.583225	0.455	0.333	4.48758e-06	8.52643e-34	0.909819	0.569	0.386	2.18157e-29
CASTOR2	1.17609e-08	0.582862	2.37788e-17	0.91004	0.437	0.276	6.08405e-13	9.72049e-17	0.901067	0.429	0.279	2.48709e-12	4.5966e-13	0.582862	0.413	0.305	1.17609e-08
TBC1D2	2.95853e-06	0.582823	7.69973e-11	0.582823	0.437	0.308	1.97005e-06	2.7192e-17	0.8862	0.439	0.292	6.95735e-13	1.15631e-10	0.602498	0.37	0.273	2.95853e-06
NFAT5	1.57466e-85	0.581469	8.25548e-103	0.874486	0.993	0.997	2.11225e-98	2.03761e-90	0.85902	0.997	0.995	5.21342e-86	6.1544e-90	0.581469	1	0.995	1.57466e-85
AL356124.1	0.000175403	0.578086	4.93391e-14	0.770005	0.503	0.347	1.26239e-09	6.85545e-09	0.578086	0.41	0.297	0.000175403	9.64714e-12	0.623387	0.393	0.291	2.46832e-07
DCUN1D3	7.98746e-07	0.576998	3.40452e-30	1.15418	0.435	0.224	8.7108e-26	6.50749e-33	1.10384	0.443	0.227	1.66501e-28	3.12181e-11	0.576998	0.349	0.251	7.98746e-07
AC027288.3	0.00229726	0.576881	8.25528e-15	1.06925	0.379	0.233	2.1122e-10	1.72882e-09	0.816443	0.339	0.234	4.42335e-05	8.97859e-08	0.576881	0.297	0.222	0.00229726
CSRNP3	0.000418477	0.573645	1.63557e-08	0.573645	0.361	0.248	0.000418477	1.69388e-14	0.844565	0.407	0.27	4.33397e-10	6.90264e-21	0.731555	0.488	0.348	1.76611e-16
RIMBP2	1.28964e-06	0.570515	5.06225e-16	0.774477	0.482	0.315	1.29523e-11	5.04042e-11	0.664873	0.483	0.364	1.28964e-06	7.05558e-18	0.570515	0.605	0.48	1.80524e-13
SLC4A8	0.00369203	0.569445	1.44299e-07	0.569445	0.437	0.333	0.00369203	3.42084e-08	0.842221	0.439	0.335	0.000875256	9.77635e-16	0.817839	0.376	0.264	2.50138e-11
PROM1	6.12558e-25	0.569328	2.39411e-29	0.569328	0.988	0.953	6.12558e-25	4.20306e-42	0.700564	0.969	0.933	1.0754e-37	3.96506e-86	0.723865	0.986	0.917	1.0145e-81
CASK	5.92961e-61	0.568262	3.74787e-87	0.744431	0.99	0.994	9.58931e-83	2.09853e-78	0.703963	0.986	0.991	5.3693e-74	2.31752e-65	0.568262	0.988	0.985	5.92961e-61
IGFBP3	6.70075e-11	0.564107	2.61891e-15	0.69088	0.86	0.768	6.70075e-11	1.36004e-26	0.685329	0.885	0.784	3.47979e-22	2.36612e-38	0.564107	0.908	0.834	6.05395e-34
CLEC2D	0.000811713	0.555322	2.38615e-12	0.881644	0.285	0.167	6.1052e-08	1.64462e-12	0.938382	0.266	0.155	4.20792e-08	3.17249e-08	0.555322	0.353	0.274	0.000811713
IFT80	6.18196e-13	0.55311	5.9628e-22	0.814239	0.702	0.549	1.52564e-17	1.88367e-23	0.871923	0.733	0.574	4.81957e-19	2.41615e-17	0.55311	0.675	0.573	6.18196e-13
CFTR	0.00467057	0.55241	1.82544e-07	0.55241	0.531	0.432	0.00467057	6.35743e-08	0.742936	0.469	0.39	0.00162661	1.46926e-44	1.13045	0.541	0.33	3.75926e-40
Z83843.1	1.57432e-06	0.549581	7.80466e-17	0.705659	0.513	0.343	1.9969e-12	6.15304e-11	0.632185	0.46	0.341	1.57432e-06	2.31409e-14	0.549581	0.448	0.328	5.92084e-10
NBEA	8.42923e-17	0.548444	3.18674e-22	0.826281	0.61	0.441	8.1536e-18	2.53117e-26	0.752894	0.661	0.465	6.47626e-22	3.29447e-21	0.548444	0.646	0.522	8.42923e-17
PRKX	3.42737e-12	0.547429	9.52785e-28	0.719573	0.744	0.544	2.4378e-23	2.49542e-19	0.632661	0.714	0.566	6.38477e-15	1.33955e-16	0.547429	0.628	0.521	3.42737e-12
PBX1	3.30855e-07	0.539312	1.29311e-11	0.539312	0.676	0.561	3.30855e-07	3.40304e-16	0.572895	0.696	0.56	8.70701e-12	4.12359e-23	0.566767	0.691	0.553	1.05506e-18
KLHL3	0.00714204	0.537494	7.02771e-08	0.673075	0.298	0.203	0.00179811	6.6145e-10	0.67926	0.321	0.213	1.69239e-05	2.79139e-07	0.537494	0.275	0.203	0.00714204
TSPAN2	0.000183812	0.531594	4.01343e-13	0.897461	0.364	0.231	1.02688e-08	5.11483e-09	0.611119	0.315	0.211	0.000130868	7.18408e-09	0.531594	0.378	0.293	0.000183812
RNF207	5.31212e-05	0.527253	7.60932e-14	0.731628	0.43	0.289	1.94692e-09	8.78481e-10	0.612612	0.373	0.26	2.24768e-05	2.07618e-09	0.527253	0.355	0.265	5.31212e-05
CASC19	1.94097e-11	0.52658	1.64115e-18	0.570847	0.853	0.753	4.19903e-14	7.58606e-16	0.52658	0.835	0.758	1.94097e-11	1.0216e-25	0.546921	0.834	0.764	2.61387e-21
ALOX5	0.0049857	0.524593	1.9486e-07	0.524593	0.405	0.3	0.0049857	1.77913e-12	0.729754	0.413	0.284	4.55207e-08	1.00813e-11	0.566327	0.433	0.329	2.57941e-07
SCRN1	1.11312e-15	0.519894	4.46906e-23	0.673453	0.752	0.598	1.14345e-18	4.35051e-20	0.631518	0.719	0.592	1.11312e-15	9.52793e-23	0.519894	0.764	0.684	2.43782e-18
KITLG	1.10192e-19	0.519021	2.92684e-59	0.85873	0.97	0.948	7.48862e-55	9.75151e-52	0.741036	0.981	0.947	2.49502e-47	4.30674e-24	0.519021	0.914	0.843	1.10192e-19
LATS2	2.32756e-12	0.518823	9.09701e-17	0.674353	0.723	0.595	2.32756e-12	4.94299e-22	0.690279	0.744	0.568	1.26471e-17	1.0633e-20	0.518823	0.767	0.672	2.72055e-16
LCA5	7.34484e-08	0.518175	3.16126e-19	0.76734	0.54	0.36	8.0884e-15	3.75124e-14	0.668452	0.506	0.362	9.59793e-10	2.87065e-12	0.518175	0.512	0.406	7.34484e-08
GLS2	0.00010606	0.515994	4.91455e-21	0.927181	0.423	0.248	1.25744e-16	1.56772e-14	0.715367	0.408	0.268	4.01118e-10	4.14525e-09	0.515994	0.345	0.26	0.00010606
AP004608.1	0.048152	0.514353	2.68267e-07	0.514353	0.336	0.236	0.00686388	1.88197e-06	0.578318	0.289	0.207	0.048152	6.4835e-18	0.843123	0.306	0.188	1.65887e-13
AMOTL2	2.595e-10	0.512495	1.01423e-14	0.641096	0.57	0.41	2.595e-10	1.47679e-18	0.719568	0.568	0.399	3.7785e-14	1.35025e-15	0.512495	0.573	0.447	3.45474e-11
ITGA9-AS1	1.19967e-13	0.511824	8.06303e-19	0.567676	0.852	0.773	2.06301e-14	4.68877e-18	0.511824	0.823	0.729	1.19967e-13	1.43909e-26	0.534665	0.794	0.682	3.68206e-22
MAP3K1	1.77004e-09	0.510469	2.91879e-19	0.616112	0.821	0.713	7.46803e-15	6.918e-14	0.510469	0.77	0.699	1.77004e-09	6.57802e-27	0.568563	0.808	0.71	1.68305e-22
GRIP1	5.46671e-10	0.508794	1.64336e-16	0.727896	0.683	0.546	4.2047e-12	3.41705e-16	0.699473	0.666	0.543	8.74287e-12	2.1366e-14	0.508794	0.683	0.597	5.46671e-10
CYFIP2	1.96416e-12	0.506673	1.00146e-51	1.04343	0.762	0.516	2.56233e-47	1.4198e-42	0.877322	0.766	0.546	3.63269e-38	7.67672e-17	0.506673	0.641	0.539	1.96416e-12
DOCK9	2.91025e-34	0.506341	3.52939e-55	0.669479	0.987	0.959	9.0303e-51	1.13744e-38	0.506341	0.972	0.954	2.91025e-34	1.70416e-57	0.508313	0.988	0.967	4.36027e-53
NEDD4L	1.19942e-22	0.506295	3.07531e-36	0.543326	0.975	0.949	7.86849e-32	4.6878e-27	0.506295	0.98	0.942	1.19942e-22	2.64267e-65	0.568835	0.993	0.967	6.76154e-61
BMP4	2.40589e-28	0.504822	9.40316e-33	0.583698	0.971	0.915	2.40589e-28	1.0027e-34	0.567869	0.96	0.928	2.5655e-30	7.89717e-47	0.504822	0.969	0.933	2.02057e-42
LINC00893	0.00319559	0.50416	1.70465e-10	0.605645	0.43	0.305	4.36153e-06	1.24896e-07	0.50416	0.399	0.299	0.00319559	2.30973e-12	0.608919	0.405	0.302	5.90967e-08
PPARGC1A	0.0111334	0.501792	3.27021e-10	0.654208	0.314	0.198	8.36716e-06	4.35136e-07	0.501792	0.335	0.24	0.0111334	1.92289e-07	0.59891	0.281	0.211	0.00491992
MIR3936HG	1.31614e-08	0.501666	5.14399e-13	0.524572	0.762	0.647	1.31614e-08	2.78703e-19	0.546365	0.769	0.657	7.1309e-15	7.07137e-21	0.501666	0.764	0.672	1.80928e-16
SESN1	8.3325e-13	0.500571	4.32479e-23	0.589255	0.809	0.648	1.10654e-18	3.25666e-17	0.500571	0.801	0.661	8.3325e-13	3.95805e-21	0.624395	0.691	0.602	1.01271e-16
AC124947.1	0.0113413	0.500401	4.43261e-07	0.500401	0.396	0.294	0.0113413	4.80002e-11	0.716434	0.396	0.274	1.22813e-06	9.80663e-15	0.796126	0.35	0.242	2.50913e-10

## Sheet: Cluster_2
GENE	max.adj.pval	min.log2FC	IKK_ko_p_val	IKK_ko_avg_log2FC	IKK_ko_pct.1	IKK_ko_pct.2	IKK_ko_p_val_adj	IKK_ko_CLD_inh_p_val	IKK_ko_CLD_inh_avg_log2FC	IKK_ko_CLD_inh_pct.1	IKK_ko_CLD_inh_pct.2	IKK_ko_CLD_inh_p_val_adj	WT_p_val	WT_avg_log2FC	WT_pct.1	WT_pct.2	WT_p_val_adj
MUC5AC	1.89614e-74	2.43567	0	3.56895	0.943	0.313	0	0	3.14017	0.926	0.306	0	7.41084e-79	2.43567	0.438	0.162	1.89614e-74
SLC14A1	3.76709e-37	1.49752	2.43242e-189	1.60723	0.995	0.798	6.22358e-185	4.21005e-219	1.61787	0.99	0.741	1.07718e-214	1.47233e-41	1.49752	0.562	0.349	3.76709e-37
ITGB2	9.84598e-24	1.44152	1.55965e-105	2.1127	0.531	0.16	3.99051e-101	3.98595e-80	1.72445	0.484	0.18	1.01984e-75	3.84819e-28	1.44152	0.251	0.107	9.84598e-24
TFF2	5.41124e-41	1.32812	6.68387e-162	2.67279	0.91	0.527	1.71013e-157	4.36562e-189	2.78473	0.881	0.467	1.11699e-184	2.11492e-45	1.32812	0.367	0.154	5.41124e-41
MMP28	3.60222e-34	1.29811	2.91044e-201	2.02391	0.963	0.563	7.44665e-197	2.68216e-223	2.16526	0.924	0.489	6.86257e-219	1.40789e-38	1.29811	0.467	0.25	3.60222e-34
TFF1	6.79975e-38	1.25268	6.13138e-136	1.4073	0.956	0.585	1.56877e-131	5.40292e-171	1.68871	0.907	0.5	1.38239e-166	2.65761e-42	1.25268	0.37	0.163	6.79975e-38
PHACTR3	3.79079e-29	1.1893	4.04075e-41	1.49957	0.462	0.23	1.03387e-36	1.48159e-33	1.1893	0.451	0.251	3.79079e-29	4.32282e-55	1.5629	0.533	0.276	1.10604e-50
TGFB2	1.46725e-11	1.18727	1.6014e-41	1.53896	0.399	0.173	4.09735e-37	2.60483e-28	1.37787	0.305	0.145	6.66472e-24	5.73458e-16	1.18727	0.254	0.14	1.46725e-11
AC004870.2	2.05918e-18	1.14698	3.9329e-73	1.51434	0.56	0.22	1.00627e-68	1.31371e-65	1.45184	0.506	0.219	3.36125e-61	8.04805e-23	1.14698	0.286	0.143	2.05918e-18
F3	1.03162e-44	1.14027	1.20175e-64	1.29477	0.868	0.647	3.07481e-60	1.03709e-53	1.16912	0.814	0.604	2.65349e-49	4.03196e-49	1.14027	0.797	0.615	1.03162e-44
MYEOV	5.5474e-54	1.07029	2.82363e-81	1.24841	0.821	0.492	7.22455e-77	3.25063e-95	1.31198	0.799	0.463	8.31706e-91	2.16814e-58	1.07029	0.779	0.541	5.5474e-54
THSD4	4.14792e-14	1.05489	8.40734e-42	1.38016	0.463	0.22	2.1511e-37	1.67461e-40	1.27469	0.446	0.224	4.28464e-36	1.62117e-18	1.05489	0.356	0.213	4.14792e-14
CREB3L1	3.29344e-23	1.0295	6.14128e-99	1.18061	0.922	0.605	1.57131e-94	3.21242e-162	1.54623	0.907	0.497	8.21931e-158	1.2872e-27	1.0295	0.409	0.227	3.29344e-23
AC019117.1	8.4988e-19	0.983135	1.50733e-32	1.25857	0.497	0.275	3.85667e-28	1.33757e-36	1.06588	0.511	0.288	3.42231e-32	3.32166e-23	0.983135	0.433	0.262	8.4988e-19
B3GALT5	6.83462e-58	0.891184	2.88859e-142	1.30406	0.983	0.782	7.39074e-138	6.3636e-167	1.33586	0.977	0.721	1.62819e-162	2.67124e-62	0.891184	0.887	0.706	6.83462e-58
VSIR	4.21408e-14	0.84637	1.44874e-28	0.910839	0.529	0.317	3.70675e-24	5.08136e-25	0.857166	0.449	0.268	1.30012e-20	1.64702e-18	0.84637	0.419	0.273	4.21408e-14
RARG	1.90947e-27	0.820507	7.48244e-52	1.04072	0.687	0.393	1.91446e-47	6.92705e-67	1.18028	0.646	0.343	1.77236e-62	7.46296e-32	0.820507	0.625	0.425	1.90947e-27
GLI2	1.5141e-14	0.795177	1.58513e-25	1.06057	0.383	0.197	4.05571e-21	2.46993e-36	1.12851	0.45	0.236	6.31956e-32	5.91768e-19	0.795177	0.54	0.392	1.5141e-14
SPON1	1.3969e-38	0.788201	5.45961e-43	0.788201	0.917	0.749	1.3969e-38	3.45291e-64	0.891626	0.939	0.747	8.83462e-60	7.71922e-46	0.997352	0.769	0.553	1.97504e-41
AMIGO2	4.32238e-15	0.782066	1.29806e-27	0.928359	0.54	0.341	3.32122e-23	1.43689e-29	0.907283	0.511	0.315	3.67642e-25	1.68935e-19	0.782066	0.483	0.328	4.32238e-15
ST3GAL4	3.19058e-07	0.782059	6.33619e-88	1.61413	0.65	0.282	1.62118e-83	1.26544e-98	1.62113	0.634	0.278	3.23776e-94	1.247e-11	0.782059	0.268	0.166	3.19058e-07
TACSTD2	5.0285e-12	0.781199	1.05237e-24	1.13198	0.302	0.139	2.69259e-20	1.66464e-23	1.14721	0.288	0.143	4.25914e-19	1.96533e-16	0.781199	0.38	0.242	5.0285e-12
MYOF	1.00066e-85	0.745184	1.71837e-116	1.02784	0.997	0.982	4.39663e-112	7.84984e-125	0.904075	0.999	0.98	2.00846e-120	3.91096e-90	0.745184	1	0.989	1.00066e-85
MLPH	1.49915e-59	0.738418	7.50508e-93	0.847572	0.982	0.862	1.92025e-88	3.77627e-93	0.82356	0.982	0.853	9.66196e-89	5.85924e-64	0.738418	0.96	0.864	1.49915e-59
NRP1	4.49704e-40	0.721673	4.76188e-91	1.16248	0.942	0.644	1.21837e-86	2.1983e-69	0.894152	0.893	0.629	5.62458e-65	1.75762e-44	0.721673	0.854	0.653	4.49704e-40
MYO16-AS1	8.27314e-14	0.721482	2.30174e-22	1.11714	0.393	0.222	5.88923e-18	3.23346e-18	0.721482	0.389	0.237	8.27314e-14	5.33588e-23	0.752622	0.453	0.272	1.36524e-18
FLNB	4.80779e-97	0.715611	1.87907e-101	0.734132	0.997	0.995	4.80779e-97	5.41648e-118	0.777319	1	0.993	1.38586e-113	6.33098e-102	0.715611	1	0.991	1.61985e-97
ALS2CL	0.00126666	0.706355	9.06289e-18	0.867542	0.379	0.226	2.31883e-13	1.17304e-17	0.858999	0.351	0.213	3.00135e-13	4.9506e-08	0.706355	0.262	0.18	0.00126666
PRNP	6.32524e-37	0.699715	9.3996e-120	1.38943	0.949	0.731	2.40498e-115	2.29307e-129	1.26582	0.952	0.732	5.86704e-125	2.47215e-41	0.699715	0.916	0.825	6.32524e-37
CAV2	1.4586e-17	0.697649	1.91121e-34	0.928685	0.696	0.481	4.89002e-30	3.16319e-24	0.697649	0.653	0.481	8.09335e-20	5.70076e-22	0.735292	0.625	0.476	1.4586e-17
ARHGAP29	7.91634e-28	0.6966	8.96242e-54	0.862181	0.928	0.773	2.29312e-49	4.1239e-55	0.820829	0.898	0.708	1.05514e-50	3.09401e-32	0.6966	0.844	0.718	7.91634e-28
TFF3	2.48383e-15	0.687534	3.21524e-101	1.36033	0.986	0.904	8.22651e-97	7.00509e-141	1.6508	0.978	0.893	1.79232e-136	9.70778e-20	0.687534	0.8	0.699	2.48383e-15
LPCAT4	5.91219e-22	0.684283	5.39429e-59	0.811823	0.916	0.738	1.38018e-54	1.57713e-57	0.862211	0.84	0.618	4.03524e-53	2.31071e-26	0.684283	0.694	0.52	5.91219e-22
ALDH1A3	0.000836681	0.678053	1.47089e-50	1.67279	0.41	0.165	3.76343e-46	1.6023e-19	1.04632	0.335	0.195	4.09964e-15	3.27007e-08	0.678053	0.295	0.208	0.000836681
PLAC8	1.05193e-23	0.675786	4.8803e-87	1.31362	0.894	0.606	1.24867e-82	1.60947e-81	1.12882	0.843	0.578	4.11798e-77	4.11135e-28	0.675786	0.738	0.569	1.05193e-23
EFNB2	2.65419e-46	0.662945	6.94479e-89	0.949303	0.974	0.842	1.77689e-84	5.11226e-87	0.895706	0.966	0.83	1.30802e-82	1.03736e-50	0.662945	0.956	0.83	2.65419e-46
LINC01239	3.91428e-10	0.662227	1.00271e-22	0.865515	0.472	0.278	2.56554e-18	1.52985e-14	0.662227	0.413	0.279	3.91428e-10	9.54698e-15	0.808514	0.473	0.346	2.44269e-10
ADGRF1	4.18968e-29	0.66162	4.58206e-151	1.60886	0.937	0.525	1.17237e-146	8.08567e-156	1.52723	0.899	0.494	2.0688e-151	1.63749e-33	0.66162	0.806	0.615	4.18968e-29
LRRC8A	7.66395e-22	0.646512	2.70661e-27	0.733969	0.767	0.61	6.92512e-23	2.99537e-26	0.653616	0.75	0.601	7.66395e-22	6.85795e-28	0.646512	0.802	0.658	1.75468e-23
CTSE	0.0486273	0.632437	3.12501e-91	1.27	0.847	0.493	7.99564e-87	8.02697e-123	1.53783	0.79	0.401	2.05378e-118	1.90054e-06	0.632437	0.262	0.19	0.0486273
SLC16A5	6.12452e-20	0.624411	1.12938e-67	1.1643	0.813	0.567	2.88963e-63	6.31669e-68	1.05082	0.793	0.546	1.61619e-63	2.3937e-24	0.624411	0.731	0.598	6.12452e-20
PCED1B	6.78293e-33	0.622317	9.36831e-50	0.787799	0.945	0.817	2.39697e-45	9.69046e-49	0.764291	0.922	0.798	2.4794e-44	2.65103e-37	0.622317	0.95	0.863	6.78293e-33
S100P	8.91446e-55	0.622002	1.63733e-104	0.904857	1	0.968	4.18928e-100	3.90319e-118	0.833059	1	0.981	9.98671e-114	3.48412e-59	0.622002	1	0.962	8.91446e-55
ANO1	2.15969e-26	0.617007	9.41309e-39	0.878414	0.733	0.51	2.40843e-34	5.16827e-55	0.913004	0.796	0.569	1.32235e-50	8.44091e-31	0.617007	0.85	0.694	2.15969e-26
NTN4	0.00024971	0.614124	1.30704e-40	1.2007	0.543	0.293	3.3442e-36	6.20622e-60	1.28534	0.56	0.269	1.58792e-55	9.75962e-09	0.614124	0.327	0.229	0.00024971
BHLHE41	6.27118e-05	0.611219	6.14281e-51	1.15407	0.649	0.365	1.5717e-46	7.69496e-52	1.13342	0.609	0.339	1.96883e-47	2.45102e-09	0.611219	0.34	0.243	6.27118e-05
IQGAP2	5.09899e-10	0.610508	1.7482e-102	1.02243	0.985	0.798	4.47295e-98	2.76417e-147	1.1922	0.978	0.751	7.0724e-143	1.99288e-14	0.610508	0.548	0.398	5.09899e-10
CNGA1	1.79002e-09	0.604564	1.09286e-30	0.827901	0.716	0.515	2.7962e-26	2.05425e-41	0.95755	0.666	0.436	5.256e-37	6.99608e-14	0.604564	0.504	0.364	1.79002e-09
DHRS3	8.10236e-41	0.604466	2.25729e-73	0.734487	0.989	0.908	5.77551e-69	8.21684e-88	0.758274	0.986	0.88	2.10236e-83	3.16671e-45	0.604466	0.973	0.899	8.10236e-41
BCAS1	1.27201e-13	0.604412	1.80141e-33	0.604412	0.709	0.454	4.6091e-29	2.07914e-34	0.882924	0.563	0.337	5.31969e-30	4.97153e-18	0.700469	0.475	0.314	1.27201e-13
FAM207A	6.79121e-15	0.604342	8.13244e-107	1.50901	0.827	0.475	2.08077e-102	1.40731e-96	1.29253	0.818	0.525	3.60073e-92	2.65427e-19	0.604342	0.65	0.502	6.79121e-15
SMAD3	1.31718e-36	0.604129	1.31573e-84	1.05528	0.971	0.88	3.36642e-80	9.05749e-65	0.886612	0.943	0.849	2.31745e-60	5.14806e-41	0.604129	0.933	0.873	1.31718e-36
DUSP5	3.38792e-07	0.594445	4.11986e-59	1.10564	0.704	0.383	1.05411e-54	1.41146e-49	1.18722	0.621	0.365	3.61136e-45	1.32413e-11	0.594445	0.492	0.372	3.38792e-07
CYP1B1	9.74152e-05	0.585581	1.75045e-56	2.03658	0.566	0.291	4.4787e-52	8.95063e-59	1.59863	0.561	0.298	2.29011e-54	3.80737e-09	0.585581	0.5	0.415	9.74152e-05
SLC9A3R2	2.67882e-14	0.582087	1.77599e-25	0.736917	0.675	0.502	4.54404e-21	1.04699e-18	0.582087	0.642	0.493	2.67882e-14	3.66367e-23	0.7207	0.589	0.422	9.37388e-19
KRT7	3.95342e-05	0.581803	1.82179e-73	1.59024	0.6	0.267	4.66124e-69	1.75425e-50	1.25882	0.564	0.31	4.48844e-46	1.54515e-09	0.581803	0.391	0.286	3.95342e-05
SIDT1	6.17139e-09	0.576256	1.85873e-30	0.795824	0.716	0.498	4.75575e-26	2.46485e-47	0.863384	0.717	0.451	6.30657e-43	2.41202e-13	0.576256	0.472	0.337	6.17139e-09
GCNT3	3.92376e-36	0.574397	3.11571e-64	0.695371	0.983	0.828	7.97187e-60	4.20595e-66	0.699379	0.969	0.811	1.07613e-61	1.53356e-40	0.574397	0.946	0.809	3.92376e-36
SPDEF	7.036e-14	0.572317	6.56397e-53	0.923118	0.775	0.507	1.67946e-48	9.41324e-54	0.962064	0.73	0.473	2.40847e-49	2.74994e-18	0.572317	0.586	0.425	7.036e-14
SDCBP2	0.0292819	0.571436	8.42668e-27	0.880065	0.551	0.345	2.15605e-22	1.10611e-27	1.00667	0.457	0.275	2.8301e-23	1.14445e-06	0.571436	0.337	0.256	0.0292819
HPGD	6.18311e-07	0.568941	1.3021e-23	0.781495	0.535	0.336	3.33154e-19	1.65313e-27	0.9416	0.507	0.318	4.2297e-23	2.4166e-11	0.568941	0.424	0.306	6.18311e-07
SLC35A1	2.65547e-38	0.567263	1.03786e-42	0.567263	0.972	0.9	2.65547e-38	1.25472e-64	0.653151	0.973	0.877	3.21033e-60	6.6694e-50	0.613027	0.953	0.857	1.70643e-45
PROSER2	2.31789e-05	0.566541	1.44171e-15	0.676536	0.567	0.422	3.68876e-11	5.60116e-14	0.616378	0.516	0.388	1.43311e-09	9.05922e-10	0.566541	0.518	0.422	2.31789e-05
CLTB	4.66256e-21	0.56449	9.36252e-56	0.733065	0.934	0.819	2.39549e-51	3.79513e-40	0.619902	0.928	0.824	9.71022e-36	1.82231e-25	0.56449	0.87	0.761	4.66256e-21
MIR31HG	1.04618e-54	0.561936	9.54194e-62	0.615067	1	0.992	2.4414e-57	4.77105e-73	0.561936	1	0.99	1.22072e-68	4.08888e-59	0.651393	0.997	0.979	1.04618e-54
MPRIP	2.03918e-51	0.558513	1.43534e-83	0.806201	0.994	0.96	3.67247e-79	1.67677e-84	0.738302	0.992	0.95	4.29018e-80	7.9699e-56	0.558513	0.989	0.965	2.03918e-51
PLEKHM1	1.28563e-22	0.557753	4.80248e-61	0.867645	0.916	0.753	1.22876e-56	1.32384e-90	0.966036	0.917	0.717	3.38718e-86	5.02475e-27	0.557753	0.843	0.686	1.28563e-22
PTTG1IP	9.31765e-42	0.556566	2.15194e-121	0.968534	0.997	0.979	5.50596e-117	4.88003e-117	0.901523	0.99	0.968	1.2486e-112	3.6417e-46	0.556566	0.982	0.976	9.31765e-42
JAG1	3.42597e-06	0.552635	1.05314e-36	1.03364	0.578	0.336	2.69457e-32	1.08945e-38	0.944386	0.59	0.359	2.78746e-34	1.339e-10	0.552635	0.538	0.434	3.42597e-06
EPHB6	3.92724e-07	0.550072	2.48595e-71	1.35828	0.732	0.428	6.36055e-67	1.31042e-51	1.15237	0.664	0.402	3.35283e-47	1.53492e-11	0.550072	0.504	0.389	3.92724e-07
AC093865.1	5.53754e-06	0.548298	1.77308e-14	0.637587	0.511	0.359	4.5366e-10	3.87486e-18	0.588801	0.486	0.317	9.91422e-14	2.16429e-10	0.548298	0.5	0.39	5.53754e-06
PLEC	8.12412e-27	0.542477	1.99515e-41	0.598796	0.971	0.899	5.10479e-37	9.62731e-42	0.560374	0.973	0.902	2.46324e-37	3.17522e-31	0.542477	0.96	0.883	8.12412e-27
CAPN8	1.34637e-40	0.541653	3.20177e-51	0.541653	0.998	0.919	8.19205e-47	5.89101e-72	0.64963	0.99	0.888	1.50727e-67	5.26215e-45	0.542121	0.972	0.881	1.34637e-40
VAMP5	0.000435749	0.531571	3.19224e-30	0.926391	0.509	0.289	8.16768e-26	7.77548e-18	0.722646	0.433	0.28	1.98943e-13	1.70308e-08	0.531571	0.392	0.292	0.000435749
ADGRG6	1.39187e-34	0.52953	2.04546e-90	0.833237	0.991	0.944	5.23351e-86	1.17647e-122	0.926006	0.992	0.909	3.01012e-118	5.43997e-39	0.52953	0.96	0.906	1.39187e-34
AC015712.1	0.00745973	0.527738	5.91036e-31	1.07894	0.475	0.264	1.51222e-26	5.53769e-13	0.805164	0.354	0.239	1.41687e-08	2.91555e-07	0.527738	0.374	0.288	0.00745973
ITGB4	2.27123e-44	0.521033	6.96383e-75	0.731787	0.995	0.943	1.78176e-70	1.0162e-55	0.623742	0.974	0.927	2.60006e-51	8.87684e-49	0.521033	0.986	0.952	2.27123e-44
ZNF185	0.000323596	0.518303	8.51205e-19	0.710949	0.526	0.354	2.17789e-14	3.6697e-17	0.693005	0.477	0.337	9.38928e-13	1.26474e-08	0.518303	0.429	0.328	0.000323596
IRS1	3.08144e-14	0.515514	1.39996e-65	0.983089	0.86	0.568	3.58195e-61	8.8502e-52	0.868934	0.768	0.524	2.26441e-47	1.20435e-18	0.515514	0.71	0.56	3.08144e-14
EPB41L1	1.65325e-25	0.514125	6.46155e-30	0.545743	0.956	0.878	1.65325e-25	8.35363e-35	0.514125	0.964	0.853	2.13736e-30	3.10468e-44	0.634976	0.945	0.803	7.94363e-40
AQP5	0.000237276	0.510375	4.90755e-57	1.34793	0.604	0.311	1.25565e-52	6.90077e-62	1.36177	0.594	0.32	1.76563e-57	9.27366e-09	0.510375	0.436	0.34	0.000237276
PPL	1.33138e-08	0.510188	3.49385e-18	0.664828	0.624	0.486	8.93936e-14	5.20354e-13	0.510188	0.603	0.488	1.33138e-08	3.23078e-22	0.649496	0.735	0.604	8.26627e-18
LINC01133	0.0152324	0.509088	1.35995e-25	0.998708	0.431	0.238	3.47956e-21	4.67665e-27	1.00752	0.431	0.249	1.19657e-22	5.95342e-07	0.509088	0.303	0.219	0.0152324
TRIB3	1.09314e-12	0.506508	4.50903e-49	1.07674	0.699	0.439	1.15368e-44	2.48028e-51	0.860173	0.757	0.496	6.34605e-47	4.27241e-17	0.506508	0.763	0.654	1.09314e-12
PLCD3	2.44478e-16	0.506249	1.7825e-59	0.871405	0.896	0.706	4.5607e-55	1.00177e-54	0.785443	0.859	0.686	2.56312e-50	9.55517e-21	0.506249	0.752	0.616	2.44478e-16
S100A14	2.47699e-25	0.505504	1.51972e-84	0.873126	0.986	0.874	3.88835e-80	1.0672e-93	0.915165	0.981	0.899	2.73054e-89	9.68104e-30	0.505504	0.962	0.891	2.47699e-25
S100A16	1.0955e-30	0.500233	8.3883e-61	0.627571	0.991	0.929	2.14623e-56	6.22877e-65	0.612491	0.988	0.935	1.59369e-60	4.28163e-35	0.500233	0.972	0.905	1.0955e-30

## Sheet: Cluster_3
GENE	max.adj.pval	min.log2FC	IKK_ko_p_val	IKK_ko_avg_log2FC	IKK_ko_pct.1	IKK_ko_pct.2	IKK_ko_p_val_adj	IKK_ko_CLD_inh_p_val	IKK_ko_CLD_inh_avg_log2FC	IKK_ko_CLD_inh_pct.1	IKK_ko_CLD_inh_pct.2	IKK_ko_CLD_inh_p_val_adj	WT_p_val	WT_avg_log2FC	WT_pct.1	WT_pct.2	WT_p_val_adj
SMOC2	0	5.00722	0	5.45283	0.717	0.057	0	0	5.47727	0.774	0.073	0	0	5.00722	0.709	0.086	0
LINC01811	1.56906e-166	3.48916	6.19378e-255	4.56916	0.555	0.051	1.58474e-250	7.47871e-249	5.16623	0.528	0.051	1.9135e-244	6.13248e-171	3.48916	0.408	0.06	1.56906e-166
LGR5	4.02578e-181	3.30892	1.33067e-199	3.52546	0.672	0.131	3.40465e-195	3.87116e-210	4.12033	0.663	0.129	9.90475e-206	1.57343e-185	3.30892	0.659	0.18	4.02578e-181
ENTPD8	8.59308e-78	3.13026	1.82271e-102	3.5994	0.328	0.05	4.66358e-98	4.60303e-148	4.30017	0.36	0.04	1.17773e-143	3.35851e-82	3.13026	0.257	0.05	8.59308e-78
NKD1	4.53225e-99	2.96565	5.98688e-196	4.16439	0.445	0.041	1.5318e-191	1.15365e-227	4.25852	0.484	0.045	2.95173e-223	1.77138e-103	2.96565	0.353	0.076	4.53225e-99
PDZRN3	2.9225e-98	2.83953	1.93825e-142	3.6732	0.401	0.052	4.95921e-138	1.14223e-102	3.18795	0.39	0.076	2.9225e-98	5.15552e-132	2.83953	0.44	0.097	1.31909e-127
SLC38A11	4.37635e-242	2.80322	1.1807e-298	3.6918	0.828	0.141	3.02094e-294	3.90829e-282	3.56864	0.807	0.15	9.99976e-278	1.71045e-246	2.80322	0.84	0.259	4.37635e-242
PROX1	8.7372e-109	2.59721	4.93126e-134	3.50945	0.445	0.075	1.26171e-129	5.55542e-133	3.27676	0.472	0.092	1.42141e-128	3.41484e-113	2.59721	0.468	0.125	8.7372e-109
AC019197.1	2.19959e-120	2.52791	5.26086e-144	3.14278	0.449	0.066	1.34604e-139	2.67997e-130	3.00542	0.415	0.066	6.85696e-126	8.59685e-125	2.52791	0.448	0.104	2.19959e-120
SLC9A3-AS1	2.7591e-77	2.36647	1.20836e-164	2.91703	0.771	0.257	3.09171e-160	3.10635e-204	3.08191	0.748	0.19	7.94791e-200	1.07836e-81	2.36647	0.451	0.155	2.7591e-77
CXCR4	3.23914e-75	2.11693	5.0798e-106	2.11693	0.557	0.149	1.29972e-101	1.69103e-115	2.41706	0.537	0.135	4.32667e-111	1.26598e-79	2.18364	0.379	0.108	3.23914e-75
AC244502.1	5.61535e-53	1.87893	3.65705e-76	2.50984	0.344	0.075	9.35692e-72	1.1239e-60	2.39363	0.272	0.059	2.87562e-56	2.1947e-57	1.87893	0.367	0.128	5.61535e-53
KLF12	1.03375e-65	1.87027	3.13775e-97	2.54717	0.468	0.115	8.02826e-93	7.23008e-147	3.00695	0.537	0.11	1.84989e-142	4.04031e-70	1.87027	0.476	0.181	1.03375e-65
VWA2	9.05332e-130	1.80762	8.95358e-149	2.30104	0.828	0.332	2.29086e-144	3.53839e-134	2.0879	0.825	0.38	9.05332e-130	9.83059e-140	1.80762	0.811	0.375	2.51526e-135
ITPR2	1.41305e-99	1.77184	8.4626e-128	2.47788	0.82	0.409	2.16524e-123	6.86101e-141	2.39851	0.856	0.459	1.75546e-136	5.52275e-104	1.77184	0.861	0.582	1.41305e-99
PRDM16	1.67399e-44	1.72216	2.76412e-127	2.8558	0.472	0.089	7.07227e-123	2.37919e-114	2.64522	0.484	0.111	6.0874e-110	6.54259e-49	1.72216	0.416	0.178	1.67399e-44
AC007405.1	2.73319e-62	1.7184	1.06824e-66	2.10763	0.468	0.161	2.73319e-62	5.37038e-69	2.16694	0.459	0.154	1.37406e-64	5.36379e-74	1.7184	0.553	0.235	1.37238e-69
SOX6	9.32086e-19	1.69147	6.32989e-66	2.47222	0.405	0.123	1.61957e-61	6.3129e-94	2.4398	0.504	0.147	1.61522e-89	3.64295e-23	1.69147	0.265	0.126	9.32086e-19
SP5	8.67976e-53	1.68956	2.57369e-62	2.02756	0.397	0.12	6.58503e-58	1.70953e-67	2.12416	0.4	0.117	4.37399e-63	3.39239e-57	1.68956	0.445	0.186	8.67976e-53
STARD13	5.37355e-44	1.6159	7.71268e-157	2.68114	0.83	0.321	1.97337e-152	4.44026e-158	2.60773	0.833	0.34	1.13609e-153	2.10019e-48	1.6159	0.536	0.286	5.37355e-44
AXIN2	1.35316e-42	1.6112	4.80989e-129	2.43713	0.615	0.167	1.23066e-124	1.10989e-120	2.46445	0.618	0.187	2.83978e-116	5.28868e-47	1.6112	0.429	0.193	1.35316e-42
LRIG1	1.31786e-174	1.55395	3.40822e-188	2.09875	0.996	0.666	8.72026e-184	2.23489e-186	1.99489	0.99	0.714	5.71818e-182	5.1507e-179	1.55395	0.99	0.832	1.31786e-174
KREMEN1	7.69784e-50	1.5379	1.32775e-79	2.01118	0.563	0.203	3.39719e-75	2.58063e-73	1.88543	0.541	0.2	6.60281e-69	3.00862e-54	1.5379	0.528	0.259	7.69784e-50
ADAMTS6	6.69272e-38	1.53264	7.11998e-47	1.58371	0.476	0.2	1.82172e-42	2.61577e-42	1.53264	0.447	0.189	6.69272e-38	3.1145e-47	1.96311	0.314	0.111	7.96875e-43
LINC01605	1.28635e-25	1.51917	2.66435e-62	2.16066	0.393	0.118	6.81701e-58	3.28994e-66	2.15417	0.419	0.13	8.41765e-62	5.02755e-30	1.51917	0.309	0.14	1.28635e-25
KIF12	1.30499e-37	1.51035	5.34716e-52	1.63518	0.449	0.168	1.36812e-47	1.02225e-58	1.92458	0.386	0.119	2.61553e-54	5.1004e-42	1.51035	0.327	0.125	1.30499e-37
PTK7	3.84886e-91	1.45147	1.1669e-110	2.00646	0.854	0.487	2.98562e-106	2.88352e-108	1.87711	0.848	0.518	7.37776e-104	1.50428e-95	1.45147	0.848	0.595	3.84886e-91
DEPTOR	1.86714e-43	1.45071	2.12675e-88	1.67698	0.753	0.359	5.44151e-84	2.70902e-68	1.59624	0.742	0.411	6.9313e-64	7.29751e-48	1.45071	0.508	0.251	1.86714e-43
ETS2	9.15732e-132	1.43556	3.06256e-140	1.6377	0.98	0.783	7.83586e-136	1.48271e-144	1.68532	0.97	0.786	3.79366e-140	3.57904e-136	1.43556	0.961	0.783	9.15732e-132
ADAMTS19	3.06726e-64	1.41859	6.62549e-92	1.97642	0.686	0.28	1.6952e-87	1.39001e-80	1.72466	0.72	0.345	3.55648e-76	1.19881e-68	1.41859	0.688	0.365	3.06726e-64
AP001442.1	7.60938e-37	1.41603	2.19194e-44	1.41603	0.595	0.321	5.6083e-40	1.21956e-55	1.64008	0.598	0.3	3.12036e-51	2.97404e-41	1.42564	0.489	0.256	7.60938e-37
AC007405.3	1.00977e-32	1.35165	7.15321e-39	1.39736	0.516	0.256	1.83022e-34	3.94659e-37	1.37335	0.478	0.233	1.00977e-32	3.78872e-55	1.35165	0.6	0.329	9.69383e-51
TRAF5	5.64773e-155	1.35016	2.60706e-184	1.83079	0.992	0.815	6.67041e-180	3.2323e-188	1.85433	0.994	0.837	8.27017e-184	2.20735e-159	1.35016	0.99	0.884	5.64773e-155
MYRIP	6.74721e-43	1.32766	4.81156e-97	2.03435	0.676	0.263	1.23108e-92	8.65822e-113	1.95736	0.774	0.326	2.21529e-108	2.63707e-47	1.32766	0.566	0.31	6.74721e-43
CCSER2	4.41047e-130	1.31896	4.74427e-136	1.54558	0.99	0.837	1.21387e-131	4.22324e-165	1.61199	0.994	0.857	1.08056e-160	1.72378e-134	1.31896	0.977	0.837	4.41047e-130
COLGALT2	5.77949e-41	1.31785	4.86523e-89	1.90982	0.761	0.378	1.24482e-84	7.89035e-65	1.62323	0.736	0.415	2.01882e-60	2.25885e-45	1.31785	0.573	0.318	5.77949e-41
AC105916.1	6.36273e-23	1.31039	3.14647e-52	1.58626	0.474	0.184	8.05056e-48	6.46344e-41	1.51005	0.431	0.181	1.65374e-36	2.4868e-27	1.31039	0.282	0.123	6.36273e-23
SLC5A1	5.68951e-52	1.30235	4.46917e-123	1.78915	0.897	0.524	1.14348e-118	2.80678e-145	1.89951	0.917	0.485	7.18143e-141	2.22368e-56	1.30235	0.693	0.423	5.68951e-52
CDCA7	3.93972e-98	1.29829	1.60563e-137	1.7877	0.885	0.369	4.10816e-133	4.78268e-114	1.5466	0.882	0.44	1.2237e-109	1.5398e-102	1.29829	0.869	0.517	3.93972e-98
CHRM3	5.94217e-172	1.29526	8.88869e-187	1.64315	1	0.929	2.27426e-182	2.32243e-176	1.48366	1	0.951	5.94217e-172	4.85566e-181	1.29526	1	0.944	1.24237e-176
SYNPR-AS1	6.82831e-32	1.27752	2.54473e-65	1.74771	0.597	0.258	6.51094e-61	3.31614e-67	1.72721	0.579	0.235	8.48468e-63	2.66877e-36	1.27752	0.447	0.224	6.82831e-32
NSMF	8.59764e-15	1.27501	1.85607e-33	1.64216	0.595	0.39	4.74895e-29	6.01489e-52	1.87334	0.634	0.382	1.53897e-47	3.36029e-19	1.27501	0.51	0.381	8.59764e-15
HOMER2	1.25934e-29	1.26431	4.35706e-44	1.51783	0.5	0.228	1.1148e-39	3.91072e-37	1.29879	0.516	0.259	1.0006e-32	4.92198e-34	1.26431	0.448	0.235	1.25934e-29
ERICH2	7.12668e-21	1.26231	2.78538e-25	1.28407	0.397	0.203	7.12668e-21	1.22121e-28	1.36053	0.386	0.184	3.1246e-24	5.21333e-42	1.26231	0.528	0.28	1.33388e-37
NECTIN3	5.42547e-23	1.25648	1.04069e-110	2.06548	0.814	0.418	2.66271e-106	3.55048e-115	1.976	0.811	0.411	9.08427e-111	2.12048e-27	1.25648	0.45	0.268	5.42547e-23
NEK5	1.54543e-17	1.25401	2.25602e-44	1.69382	0.425	0.172	5.77227e-40	3.96075e-39	1.53208	0.423	0.185	1.0134e-34	6.04014e-22	1.25401	0.273	0.132	1.54543e-17
CACNA1D	7.16919e-76	1.24923	3.55804e-94	1.2921	0.957	0.769	9.10359e-90	3.59893e-99	1.38028	0.961	0.733	9.20822e-95	2.802e-80	1.24923	0.896	0.676	7.16919e-76
CACHD1	4.31059e-38	1.23988	5.553e-114	2.13038	0.745	0.301	1.42079e-109	1.25752e-122	1.99922	0.791	0.335	3.21749e-118	1.68475e-42	1.23988	0.573	0.33	4.31059e-38
CEMIP	1.88989e-97	1.23851	9.68554e-107	1.32004	0.992	0.92	2.47814e-102	7.38644e-102	1.23851	0.998	0.909	1.88989e-97	3.04498e-138	1.25194	0.998	0.931	7.7909e-134
TMEM150C	3.30062e-48	1.23167	2.43655e-84	1.82163	0.623	0.238	6.23415e-80	9.40702e-90	1.88224	0.657	0.262	2.40688e-85	1.29001e-52	1.23167	0.618	0.333	3.30062e-48
PLEKHB1	1.00389e-44	1.23111	6.96238e-85	1.85352	0.619	0.232	1.78139e-80	1.32589e-91	1.91721	0.632	0.243	3.39242e-87	3.92358e-49	1.23111	0.521	0.249	1.00389e-44
CHRM3-AS2	3.56642e-46	1.22059	3.48843e-70	1.43197	0.731	0.355	8.92551e-66	6.17387e-65	1.34318	0.728	0.386	1.57965e-60	1.39389e-50	1.22059	0.615	0.342	3.56642e-46
SYNPR	4.1184e-21	1.20837	1.45329e-56	1.69202	0.502	0.201	3.71839e-52	6.93146e-75	1.94448	0.518	0.182	1.77348e-70	1.60963e-25	1.20837	0.312	0.148	4.1184e-21
PLCB4	1.87018e-33	1.20635	4.11914e-53	1.41839	0.646	0.326	1.05392e-48	7.30937e-38	1.20635	0.604	0.347	1.87018e-33	6.58394e-114	1.82468	0.756	0.358	1.68457e-109
EPHB3	4.04803e-29	1.19217	3.27405e-53	1.51387	0.51	0.211	8.37698e-49	3.95576e-51	1.53816	0.486	0.201	1.01212e-46	1.58213e-33	1.19217	0.456	0.244	4.04803e-29
AHRR	8.43174e-39	1.18803	1.47992e-50	1.29286	0.7	0.394	3.78653e-46	3.29545e-43	1.19116	0.675	0.404	8.43174e-39	1.59944e-66	1.18803	0.812	0.574	4.09233e-62
AC020656.2	1.99967e-17	1.16726	7.1776e-52	1.66883	0.666	0.373	1.83646e-47	1.38582e-30	1.31821	0.557	0.341	3.54576e-26	7.81547e-22	1.16726	0.492	0.331	1.99967e-17
APP	2.37148e-163	1.15708	9.26865e-168	1.23185	1	1	2.37148e-163	1.39903e-170	1.26191	1	0.999	3.57955e-166	6.40539e-193	1.15708	1	1	1.63888e-188
KCNMB4	3.39937e-15	1.15163	1.94661e-56	1.47552	0.796	0.554	4.9806e-52	8.66781e-59	1.60617	0.793	0.561	2.21775e-54	1.32861e-19	1.15163	0.647	0.544	3.39937e-15
AC087854.1	3.26861e-07	1.14587	6.21074e-16	1.18891	0.379	0.228	1.58908e-11	7.8065e-13	1.14587	0.341	0.214	1.99737e-08	1.2775e-11	1.15247	0.299	0.192	3.26861e-07
MGAT5	3.75246e-120	1.14144	2.69108e-129	1.40459	1	0.994	6.8854e-125	1.46661e-124	1.24087	1	0.995	3.75246e-120	4.16869e-140	1.14144	1	0.999	1.0666e-135
COL27A1	7.17189e-13	1.13128	1.45314e-29	1.28497	0.372	0.163	3.718e-25	2.80305e-17	1.13128	0.297	0.151	7.17189e-13	7.1635e-56	1.73589	0.353	0.12	1.83285e-51
ASIC2	9.34712e-17	1.13108	4.33226e-34	1.25854	0.615	0.378	1.10845e-29	3.65322e-21	1.13108	0.535	0.354	9.34712e-17	5.28168e-46	1.55386	0.492	0.244	1.35137e-41
ANXA6	3.78813e-33	1.12911	5.63427e-89	1.6335	0.684	0.265	1.44158e-84	1.84661e-75	1.58327	0.632	0.259	4.72474e-71	1.48055e-37	1.12911	0.565	0.34	3.78813e-33
ZNRF3	7.52234e-99	1.12293	6.4132e-146	1.7219	0.976	0.721	1.64088e-141	2.02834e-114	1.43322	0.974	0.783	5.1897e-110	2.94002e-103	1.12293	0.982	0.879	7.52234e-99
EPHB2	4.66913e-44	1.11542	9.90745e-70	1.43844	0.822	0.51	2.53492e-65	1.45499e-77	1.47867	0.837	0.553	3.72274e-73	1.82488e-48	1.11542	0.804	0.616	4.66913e-44
TINAG	1.96389e-30	1.11054	2.75987e-46	1.36579	0.601	0.307	7.06141e-42	1.97499e-44	1.30492	0.596	0.315	5.05321e-40	7.67563e-35	1.11054	0.532	0.308	1.96389e-30
NAALADL2	6.45442e-93	1.10779	8.32783e-115	1.44046	0.964	0.76	2.13076e-110	1.18728e-103	1.28813	0.99	0.802	3.03778e-99	2.52264e-97	1.10779	0.971	0.814	6.45442e-93
FSIP2-AS1	2.51444e-23	1.10479	9.26805e-36	1.35021	0.575	0.329	2.37132e-31	8.57295e-33	1.26702	0.541	0.306	2.19348e-28	9.8274e-28	1.10479	0.523	0.331	2.51444e-23
PLEKHS1	1.1217e-96	1.10083	3.49464e-120	1.35273	0.986	0.72	8.9414e-116	2.86276e-120	1.38804	0.976	0.703	7.32466e-116	4.38404e-101	1.10083	0.96	0.778	1.1217e-96
RHOU	1.42394e-26	1.09509	2.23796e-43	1.26082	0.599	0.315	5.72605e-39	3.82038e-32	1.09509	0.549	0.304	9.77482e-28	5.56532e-31	1.11301	0.503	0.291	1.42394e-26
LMCD1	6.43988e-09	1.0825	4.37625e-22	1.48691	0.516	0.33	1.11971e-17	2.92054e-32	1.8613	0.526	0.302	7.4725e-28	2.51695e-13	1.0825	0.481	0.352	6.43988e-09
CFTR	1.22261e-36	1.05945	3.37453e-46	1.13019	0.719	0.408	8.63407e-42	4.77845e-41	1.05945	0.657	0.368	1.22261e-36	5.82542e-63	1.25058	0.659	0.333	1.49049e-58
ZNF703	2.27405e-53	1.05876	5.95206e-123	1.58231	0.923	0.549	1.52289e-118	1.00914e-111	1.46944	0.923	0.576	2.58199e-107	8.88788e-58	1.05876	0.807	0.569	2.27405e-53
MCTP1	1.23195e-25	1.04983	2.77705e-33	1.51085	0.532	0.301	7.10537e-29	4.81495e-30	1.0625	0.661	0.443	1.23195e-25	2.80869e-40	1.04983	0.689	0.443	7.18631e-36
NTRK2	8.79848e-14	1.04615	7.52638e-19	1.2716	0.3	0.149	1.9257e-14	3.43879e-18	1.23861	0.299	0.151	8.79848e-14	3.97101e-19	1.04615	0.337	0.187	1.01602e-14
SLC39A8	2.3983e-32	1.04496	1.3878e-60	1.38625	0.767	0.464	3.55084e-56	2.95105e-54	1.23896	0.778	0.5	7.55056e-50	9.37349e-37	1.04496	0.662	0.449	2.3983e-32
SLC6A6	4.39795e-44	1.04022	1.38961e-61	1.04022	0.87	0.582	3.55545e-57	1.71889e-48	1.05157	0.793	0.53	4.39795e-44	1.40367e-49	1.04628	0.739	0.495	3.59143e-45
CAPN12	3.90268e-33	1.03966	3.60328e-175	2.14184	0.97	0.586	9.21936e-171	1.2948e-190	2.26342	0.951	0.52	3.31288e-186	1.52532e-37	1.03966	0.749	0.592	3.90268e-33
MAN1A1	1.95254e-14	1.03805	2.17173e-72	1.74359	0.64	0.275	5.55658e-68	2.48644e-86	1.74147	0.709	0.31	6.36181e-82	7.63128e-19	1.03805	0.456	0.302	1.95254e-14
LINC00271	6.51357e-07	1.03761	3.24655e-13	1.03761	0.318	0.186	8.30663e-09	8.55527e-14	1.06046	0.346	0.209	2.18895e-09	2.54576e-11	1.21432	0.262	0.163	6.51357e-07
STXBP6	4.74987e-38	1.03349	1.02179e-49	1.22841	0.763	0.494	2.61435e-45	1.85643e-42	1.03349	0.756	0.487	4.74987e-38	4.09078e-63	1.34186	0.701	0.399	1.04667e-58
RNF128	4.24436e-57	1.02646	4.74375e-87	1.24806	0.982	0.838	1.21374e-82	2.53809e-92	1.25969	0.967	0.798	6.49397e-88	1.65886e-61	1.02646	0.901	0.754	4.24436e-57
SOBP	1.74571e-09	1.02167	6.28244e-21	1.13808	0.389	0.207	1.60742e-16	6.82289e-14	1.02167	0.394	0.253	1.74571e-09	1.50956e-21	1.13075	0.401	0.238	3.86235e-17
LYZ	1.75849e-89	1.01188	4.36196e-101	1.03197	1	1	1.11605e-96	9.67604e-146	1.31129	1	1	2.47571e-141	6.87288e-94	1.01188	1	1	1.75849e-89
SLC12A2	2.29683e-153	1.01013	8.19239e-182	1.32706	1	0.975	2.0961e-177	4.46928e-170	1.27886	1	0.98	1.14351e-165	8.97691e-158	1.01013	1	0.985	2.29683e-153
KANK1	5.93543e-54	1.00378	1.52391e-79	1.25545	0.96	0.817	3.89907e-75	1.48495e-71	1.13494	0.969	0.819	3.79941e-67	2.3198e-58	1.00378	0.913	0.789	5.93543e-54
MAP2K6	6.09007e-58	1.00262	2.80428e-107	1.66518	0.875	0.535	7.17504e-103	7.0284e-76	1.39058	0.866	0.563	1.79829e-71	2.38023e-62	1.00262	0.882	0.717	6.09007e-58
LMCD1-AS1	4.0663e-18	0.990426	1.99081e-27	1.32918	0.502	0.283	5.0937e-23	2.14108e-41	1.52662	0.553	0.29	5.47816e-37	1.58927e-22	0.990426	0.531	0.349	4.0663e-18
IL17RD	8.96426e-14	0.985305	1.64971e-20	1.19322	0.374	0.199	4.22094e-16	3.50358e-18	1.03348	0.35	0.187	8.96426e-14	3.7773e-21	0.985305	0.374	0.21	9.66461e-17
PROM1	1.58761e-77	0.982893	6.20499e-82	0.982893	0.998	0.952	1.58761e-77	5.23367e-103	1.06562	0.994	0.931	1.33909e-98	5.68503e-123	1.09438	0.994	0.921	1.45457e-118
HNF1A-AS1	1.31779e-98	0.979522	1.54858e-111	0.994313	0.998	0.905	3.9622e-107	5.15043e-103	0.979522	0.998	0.882	1.31779e-98	1.08487e-135	1.09837	0.997	0.87	2.77576e-131
PPARGC1A	1.74659e-13	0.978594	4.181e-50	1.73544	0.458	0.18	1.06975e-45	4.05608e-35	1.41335	0.461	0.227	1.03779e-30	6.82635e-18	0.978594	0.354	0.207	1.74659e-13
FGF9	2.38717e-08	0.971408	3.92359e-47	1.94594	0.326	0.101	1.00389e-42	2.33761e-40	1.79861	0.333	0.118	5.981e-36	9.33e-13	0.971408	0.327	0.209	2.38717e-08
ASCL2	1.7697e-31	0.964337	5.23898e-109	1.95327	0.761	0.322	1.34044e-104	9.49417e-110	1.84204	0.797	0.37	2.42918e-105	6.91667e-36	0.964337	0.668	0.459	1.7697e-31
SLC4A8	1.09137e-12	0.964104	2.01065e-38	1.35485	0.571	0.316	5.14445e-34	2.78235e-40	1.27595	0.581	0.32	7.11892e-36	4.26549e-17	0.964104	0.413	0.268	1.09137e-12
ZCCHC24	2.32286e-17	0.963887	2.65232e-54	1.61328	0.502	0.205	6.78624e-50	4.37962e-42	1.41975	0.474	0.213	1.12057e-37	9.07864e-22	0.963887	0.38	0.212	2.32286e-17
LMF1	2.88982e-13	0.962557	1.99065e-29	1.10574	0.52	0.285	5.09329e-25	6.90405e-28	1.11722	0.49	0.272	1.76647e-23	1.12945e-17	0.962557	0.372	0.226	2.88982e-13
CADM1	2.16232e-05	0.958232	1.56281e-22	1.21904	0.397	0.209	3.99861e-18	1.48125e-17	1.14465	0.38	0.218	3.78993e-13	8.45116e-10	0.958232	0.388	0.287	2.16232e-05
KIZ	5.31215e-24	0.949738	6.98051e-37	1.31093	0.67	0.459	1.78603e-32	2.07619e-28	1.05875	0.659	0.451	5.31215e-24	4.90056e-35	0.949738	0.73	0.525	1.25386e-30
LARGE2	7.40511e-20	0.941689	1.27161e-47	1.39675	0.561	0.27	3.25355e-43	1.34298e-42	1.35304	0.535	0.265	3.43616e-38	2.8942e-24	0.941689	0.487	0.298	7.40511e-20
ADAMTS17	1.56855e-09	0.936145	1.29213e-28	1.56853	0.385	0.186	3.30605e-24	2.20744e-14	1.03238	0.346	0.208	5.64796e-10	6.13049e-14	0.936145	0.356	0.228	1.56855e-09
NEK3	3.88342e-20	0.930492	1.39388e-35	1.04337	0.652	0.394	3.56639e-31	7.75004e-36	1.07519	0.665	0.409	1.98292e-31	1.51779e-24	0.930492	0.549	0.372	3.88342e-20
ITGA1	7.98442e-40	0.927912	3.12062e-44	0.927912	0.868	0.668	7.98442e-40	4.92286e-69	1.25947	0.843	0.538	1.25956e-64	6.11932e-93	1.31597	0.864	0.589	1.56569e-88
CCDC186	2.67275e-49	0.925047	6.85984e-55	0.975346	0.947	0.829	1.75516e-50	5.53054e-61	1.05518	0.927	0.793	1.41504e-56	1.04461e-53	0.925047	0.883	0.737	2.67275e-49
FAM171A1	1.96129e-14	0.923622	4.52997e-26	1.14452	0.46	0.252	1.15904e-21	7.66549e-19	0.923622	0.423	0.247	1.96129e-14	5.06043e-19	1.05062	0.356	0.206	1.29476e-14
MIA	1.18237e-16	0.922157	2.67956e-60	1.33705	0.777	0.477	6.85592e-56	1.54012e-72	1.50983	0.801	0.512	3.94055e-68	4.62115e-21	0.922157	0.531	0.371	1.18237e-16
FRMD4A	4.71462e-07	0.920655	4.83254e-12	1.03234	0.291	0.168	1.23645e-07	1.84265e-11	0.942726	0.283	0.167	4.71462e-07	8.7531e-12	0.920655	0.286	0.179	2.23957e-07
PTCH1	7.66876e-10	0.910504	1.52606e-26	1.19629	0.411	0.205	3.90458e-22	4.61554e-16	0.910504	0.364	0.206	1.18093e-11	2.99725e-14	0.949357	0.309	0.185	7.66876e-10
AC019211.1	3.58712e-05	0.906929	6.67516e-10	1.03126	0.292	0.181	1.70791e-05	1.40199e-09	0.906929	0.301	0.191	3.58712e-05	1.49208e-15	0.914871	0.374	0.235	3.81764e-11
GAD1	1.58021e-15	0.901903	3.13928e-27	1.23039	0.551	0.332	8.03217e-23	6.17607e-20	0.901903	0.559	0.369	1.58021e-15	4.46878e-51	1.39167	0.68	0.425	1.14338e-46
PALD1	2.09058e-16	0.890115	5.50963e-42	1.31641	0.54	0.266	1.40969e-37	8.1708e-21	0.890115	0.528	0.337	2.09058e-16	2.85038e-45	1.01466	0.701	0.439	7.29297e-41
SNED1	5.71202e-24	0.881617	8.21159e-53	1.50439	0.621	0.32	2.10102e-48	9.10932e-36	1.25527	0.6	0.349	2.33071e-31	2.23248e-28	0.881617	0.697	0.52	5.71202e-24
BLNK	5.95552e-08	0.87604	1.01587e-21	0.939136	0.462	0.262	2.59921e-17	2.3792e-21	1.12222	0.445	0.263	6.08741e-17	2.32765e-12	0.87604	0.259	0.151	5.95552e-08
ARID5B	1.2218e-45	0.873088	4.21418e-58	0.940638	0.966	0.817	1.07824e-53	4.77527e-50	0.873088	0.947	0.801	1.2218e-45	2.29936e-63	0.993318	0.89	0.683	5.88314e-59
CHST15	1.40298e-40	0.872037	2.5381e-53	1.45933	0.628	0.308	6.49397e-49	5.48339e-45	1.25434	0.606	0.323	1.40298e-40	1.52274e-46	0.872037	0.853	0.679	3.89609e-42
CERS6	6.8956e-82	0.871729	2.69507e-86	0.984882	0.99	0.973	6.8956e-82	1.35932e-102	1.02382	1	0.976	3.47795e-98	8.28437e-113	0.871729	0.998	0.989	2.11964e-108
EDN1	6.28246e-15	0.87097	2.05471e-33	1.33743	0.439	0.203	5.25718e-29	6.72462e-24	1.58335	0.341	0.162	1.72056e-19	2.45543e-19	0.87097	0.487	0.319	6.28246e-15
ARHGAP4	3.32109e-10	0.870198	9.83409e-22	1.30241	0.298	0.137	2.51615e-17	6.958e-18	1.17251	0.289	0.144	1.78028e-13	1.29801e-14	0.870198	0.316	0.187	3.32109e-10
RAP1GAP2	1.64826e-15	0.865116	6.44206e-20	0.9082	0.538	0.347	1.64826e-15	8.25967e-28	1.16636	0.549	0.332	2.11332e-23	3.41039e-20	0.865116	0.57	0.411	8.72581e-16
VSNL1	6.42481e-09	0.864909	1.60583e-32	1.3927	0.403	0.184	4.10866e-28	6.56593e-33	1.46304	0.433	0.209	1.67996e-28	2.51106e-13	0.864909	0.372	0.244	6.42481e-09
SEC16B	3.38657e-20	0.861468	2.92707e-43	0.977159	0.761	0.483	7.48921e-39	6.0864e-40	1.03638	0.707	0.463	1.55727e-35	1.3236e-24	0.861468	0.607	0.427	3.38657e-20
CCDC170	6.91598e-08	0.857874	9.48879e-31	1.50274	0.37	0.165	2.4278e-26	5.40878e-28	1.32516	0.36	0.164	1.38389e-23	2.70303e-12	0.857874	0.316	0.201	6.91598e-08
COBLL1	1.40638e-55	0.851405	2.21188e-96	1.34138	0.978	0.808	5.65932e-92	7.5675e-96	1.26375	0.967	0.833	1.93622e-91	5.49667e-60	0.851405	0.961	0.903	1.40638e-55
FARP1	4.63243e-72	0.848356	3.10431e-83	0.928121	0.98	0.875	7.94268e-79	3.09798e-77	0.928901	0.976	0.877	7.92648e-73	1.81053e-76	0.848356	0.971	0.878	4.63243e-72
GUCY1A1	9.25151e-15	0.847127	7.4016e-30	0.993677	0.632	0.396	1.89377e-25	3.61585e-19	0.847127	0.581	0.405	9.25151e-15	5.39886e-22	0.92088	0.482	0.303	1.38135e-17
TBXAS1	1.31388e-36	0.842723	8.57707e-47	0.988593	0.889	0.709	2.19453e-42	1.49904e-48	1.03686	0.87	0.692	3.83545e-44	5.13515e-41	0.842723	0.859	0.687	1.31388e-36
ACSS1	9.9042e-25	0.840427	5.52984e-53	1.16925	0.733	0.424	1.41487e-48	1.07179e-46	1.12267	0.722	0.443	2.74228e-42	3.87094e-29	0.840427	0.628	0.434	9.9042e-25
NMNAT3	9.4336e-21	0.839653	5.85594e-60	1.39904	0.694	0.359	1.4983e-55	2.90601e-42	1.1378	0.671	0.4	7.43533e-38	3.68702e-25	0.839653	0.642	0.453	9.4336e-21
AL078587.2	3.28467e-08	0.838396	1.23314e-38	1.30179	0.514	0.253	3.15511e-34	3.37583e-24	1.00246	0.469	0.267	8.63739e-20	1.28378e-12	0.838396	0.343	0.229	3.28467e-08
CRACR2A	2.24907e-10	0.836535	1.76738e-35	1.13509	0.642	0.395	4.52202e-31	4.71452e-22	0.919569	0.587	0.396	1.20626e-17	8.79025e-15	0.836535	0.566	0.459	2.24907e-10
MYB	1.57629e-26	0.832957	2.64481e-37	0.937038	0.781	0.536	6.76701e-33	6.16076e-31	0.835738	0.778	0.545	1.57629e-26	2.93006e-32	0.832957	0.744	0.565	7.49684e-28
FGGY	1.06545e-18	0.830738	4.16418e-23	0.959597	0.607	0.403	1.06545e-18	4.02768e-33	1.11917	0.65	0.429	1.03052e-28	1.88691e-24	0.830738	0.623	0.443	4.82784e-20
CDON	1.12353e-09	0.828818	3.26606e-24	1.08591	0.506	0.302	8.35653e-20	3.60663e-24	1.09687	0.494	0.295	9.22792e-20	4.39121e-14	0.828818	0.448	0.31	1.12353e-09
NFATC2	9.31224e-06	0.827362	8.52863e-50	1.32659	0.767	0.518	2.18214e-45	1.54861e-55	1.5462	0.76	0.501	3.96228e-51	3.63958e-10	0.827362	0.599	0.525	9.31224e-06
CEACAM1	5.97109e-13	0.821871	1.81906e-20	0.845325	0.48	0.283	4.65425e-16	1.77777e-21	1.00595	0.427	0.242	4.54861e-17	2.33373e-17	0.821871	0.39	0.238	5.97109e-13
TMEM131L	3.01592e-09	0.821337	1.6213e-39	1.26743	0.565	0.287	4.14827e-35	4.47286e-29	0.949991	0.583	0.348	1.14443e-24	1.17874e-13	0.821337	0.424	0.291	3.01592e-09
CEP72	1.24476e-14	0.818824	1.49743e-79	1.53134	0.787	0.463	3.83133e-75	1.05384e-98	1.61376	0.807	0.431	2.69634e-94	4.86502e-19	0.818824	0.589	0.443	1.24476e-14
LINC01748	2.04289e-21	0.814779	2.96028e-30	1.02673	0.757	0.595	7.57416e-26	7.9844e-26	0.956276	0.746	0.588	2.04289e-21	8.70203e-31	0.814779	0.807	0.68	2.2265e-26
KDM7A	3.51711e-26	0.814677	1.37462e-30	0.814677	0.832	0.644	3.51711e-26	9.26184e-42	1.02264	0.803	0.586	2.36973e-37	1.80833e-35	0.890305	0.738	0.55	4.62679e-31
MCF2L	6.07718e-19	0.813099	9.95455e-31	0.990822	0.559	0.31	2.54697e-26	1.43362e-30	1.16465	0.557	0.333	3.66807e-26	2.3752e-23	0.813099	0.599	0.411	6.07718e-19
RNASE1	1.78211e-32	0.809807	1.20943e-37	0.897907	0.854	0.652	3.09444e-33	1.31262e-57	1.12444	0.866	0.638	3.35846e-53	6.96517e-37	0.809807	0.78	0.583	1.78211e-32
SCD5	1.40195e-29	0.80906	9.57812e-84	1.31174	0.881	0.585	2.45066e-79	5.16528e-70	1.25706	0.856	0.595	1.32159e-65	5.47937e-34	0.80906	0.809	0.656	1.40195e-29
PGM2L1	2.657e-22	0.807274	1.03846e-26	0.957964	0.684	0.459	2.657e-22	3.85454e-32	0.958553	0.689	0.463	9.86223e-28	8.31358e-27	0.807274	0.647	0.446	2.12711e-22
RAB4B	1.06464e-18	0.806043	6.32466e-46	1.07991	0.792	0.556	1.61823e-41	4.16101e-23	0.806043	0.736	0.561	1.06464e-18	3.96641e-26	0.937291	0.654	0.503	1.01485e-21
PPM1H	9.42528e-54	0.805695	2.71381e-66	0.981291	0.974	0.862	6.94355e-62	3.68377e-58	0.805695	0.98	0.911	9.42528e-54	4.76927e-62	0.818976	0.964	0.867	1.22027e-57
LINC01473	6.30992e-61	0.804955	2.12588e-74	1.10547	0.96	0.827	5.43927e-70	2.46616e-65	1.0095	0.961	0.837	6.30992e-61	8.63253e-67	0.804955	0.977	0.919	2.20872e-62
NCKAP5L	4.66925e-07	0.803763	4.21536e-13	0.911553	0.296	0.165	1.07854e-08	1.82492e-11	0.920994	0.287	0.169	4.66925e-07	4.27262e-13	0.803763	0.278	0.161	1.09319e-08
TSPAN5	2.10205e-24	0.799558	8.21562e-29	0.799558	0.824	0.699	2.10205e-24	3.18327e-37	0.969611	0.827	0.669	8.14473e-33	1.03549e-42	0.905621	0.843	0.683	2.6494e-38
AC020656.1	2.21856e-52	0.797742	9.46958e-72	0.797742	0.994	0.959	2.42289e-67	2.60947e-105	1.13498	0.994	0.936	6.67658e-101	8.67099e-57	0.91101	0.94	0.861	2.21856e-52
LINC00467	0.000130343	0.79428	1.94964e-28	1.18265	0.654	0.467	4.98835e-24	1.45249e-23	1.28225	0.632	0.484	3.71633e-19	5.09431e-09	0.79428	0.534	0.458	0.000130343
TGFBR3	8.36059e-35	0.792493	1.41205e-39	0.800901	0.929	0.808	3.61286e-35	5.36597e-45	0.879887	0.907	0.789	1.37294e-40	3.26764e-39	0.792493	0.917	0.821	8.36059e-35
AC046134.2	1.65517e-11	0.784744	2.05406e-27	1.05748	0.567	0.342	5.25552e-23	6.46906e-16	0.784744	0.512	0.339	1.65517e-11	1.17877e-18	0.793991	0.494	0.324	3.016e-14
TRIM2	1.91856e-101	0.784544	3.31651e-114	0.905345	1	0.997	8.48561e-110	1.15531e-127	0.974463	1	0.997	2.95598e-123	7.49847e-106	0.784544	1	0.996	1.91856e-101
SUCLG2-AS1	1.80507e-05	0.784252	4.45339e-13	1.08506	0.312	0.182	1.13944e-08	7.0549e-10	0.84455	0.348	0.233	1.80507e-05	1.37888e-11	0.784252	0.366	0.246	3.528e-07
BBS9	2.0205e-15	0.77877	1.81617e-27	1.03087	0.599	0.385	4.64686e-23	7.8969e-20	0.77877	0.646	0.46	2.0205e-15	9.3559e-21	0.833551	0.636	0.494	2.3938e-16
PAM	1.49042e-44	0.77749	4.11321e-49	0.900597	0.978	0.914	1.0524e-44	2.0821e-68	1.04914	0.984	0.898	5.32727e-64	5.82513e-49	0.77749	0.961	0.913	1.49042e-44
ST6GAL1	3.62631e-05	0.776947	9.63745e-10	0.902075	0.356	0.239	2.46584e-05	1.4173e-09	0.776947	0.384	0.265	3.62631e-05	5.87644e-20	0.904183	0.443	0.273	1.50355e-15
SOX9-AS1	1.03054e-05	0.772843	8.46336e-32	1.26358	0.447	0.214	2.16544e-27	8.52688e-21	1.15823	0.366	0.192	2.18169e-16	4.02774e-10	0.772843	0.264	0.164	1.03054e-05
SESN3	1.29949e-05	0.770851	4.04356e-16	0.865175	0.583	0.42	1.03459e-11	8.36662e-12	0.770851	0.545	0.419	2.14068e-07	5.0789e-10	0.847192	0.472	0.364	1.29949e-05
ZNF235	1.34193e-06	0.765097	6.51649e-21	0.991517	0.518	0.328	1.66731e-16	2.78628e-25	1.03103	0.522	0.311	7.12898e-21	5.24479e-11	0.765097	0.476	0.371	1.34193e-06
EPCAM-DT	6.59504e-10	0.76416	3.88344e-22	1.02675	0.494	0.3	9.93616e-18	2.5776e-14	0.860363	0.406	0.255	6.59504e-10	6.40785e-16	0.76416	0.529	0.375	1.63951e-11
UBA6-AS1	0.0109096	0.764018	4.2639e-07	0.773882	0.296	0.202	0.0109096	4.80133e-08	0.876113	0.337	0.236	0.00122847	4.21617e-09	0.764018	0.33	0.23	0.000107875
BCL11A	1.72404e-11	0.76166	2.21065e-17	0.884353	0.516	0.346	5.65618e-13	6.68447e-18	0.847784	0.512	0.341	1.71029e-13	6.7382e-16	0.76166	0.484	0.332	1.72404e-11
PCMTD2	5.80239e-36	0.760584	2.06438e-48	0.897688	0.868	0.644	5.28193e-44	7.43552e-44	0.871553	0.854	0.642	1.90245e-39	2.2678e-40	0.760584	0.828	0.67	5.80239e-36
GRIN2B	4.32014e-12	0.759241	1.68848e-16	0.871946	0.455	0.28	4.32014e-12	1.69534e-20	0.759241	0.486	0.286	4.33769e-16	2.05245e-33	0.934103	0.589	0.36	5.25141e-29
CCDC69	6.35721e-10	0.758757	2.70615e-17	0.866337	0.449	0.277	6.92396e-13	1.18523e-19	0.886597	0.469	0.283	3.03253e-15	2.48464e-14	0.758757	0.39	0.253	6.35721e-10
NBEA	3.18253e-17	0.757976	2.99151e-24	0.885225	0.648	0.44	7.65407e-20	1.24386e-21	0.826712	0.669	0.471	3.18253e-17	1.01024e-23	0.757976	0.689	0.526	2.5848e-19
SLC16A10	5.95471e-13	0.756887	2.46936e-22	0.927747	0.54	0.34	6.31811e-18	2.48726e-24	0.950007	0.591	0.387	6.36391e-20	2.32733e-17	0.756887	0.565	0.407	5.95471e-13
TMPRSS2	2.15537e-26	0.753508	2.29641e-42	0.87244	0.879	0.72	5.8756e-38	4.82043e-44	0.910212	0.844	0.672	1.23336e-39	8.42401e-31	0.753508	0.798	0.643	2.15537e-26
MLXIPL	7.66046e-21	0.746546	3.00374e-38	1.13899	0.648	0.393	7.68537e-34	1.03915e-55	1.34172	0.687	0.387	2.65878e-51	2.994e-25	0.746546	0.67	0.486	7.66046e-21
DNAH6	0.000429572	0.746164	4.5456e-10	0.871086	0.263	0.154	1.16304e-05	1.43043e-14	1.05353	0.311	0.173	3.65989e-10	1.67893e-08	0.746164	0.303	0.207	0.000429572
SORBS1	7.36732e-43	0.744709	1.49998e-77	1.24176	0.899	0.639	3.83786e-73	3.22198e-79	1.23667	0.906	0.639	8.24377e-75	2.87943e-47	0.744709	0.913	0.815	7.36732e-43
PCMTD1	2.35682e-61	0.73881	2.40657e-91	0.940141	0.984	0.927	6.15744e-87	1.2943e-77	0.898634	0.984	0.902	3.3116e-73	9.21138e-66	0.73881	0.971	0.893	2.35682e-61
SNTB1	3.72809e-69	0.734978	9.77659e-132	1.3879	1	0.954	2.50144e-127	7.33933e-123	1.20048	0.998	0.972	1.87784e-118	1.45708e-73	0.734978	1	0.994	3.72809e-69
CLU	6.45407e-16	0.731591	2.79274e-69	1.39738	0.885	0.643	7.14551e-65	3.56545e-73	1.44696	0.86	0.641	9.12255e-69	2.5225e-20	0.731591	0.744	0.642	6.45407e-16
LINC00920	9.46095e-06	0.728027	2.55314e-14	0.899526	0.395	0.24	6.53248e-10	1.02103e-10	0.878775	0.346	0.226	2.6124e-06	3.6977e-10	0.728027	0.324	0.218	9.46095e-06
AL596214.1	0.0181409	0.72567	7.09015e-07	0.72567	0.273	0.182	0.0181409	1.72862e-10	1.02084	0.283	0.174	4.42284e-06	9.46389e-11	0.907928	0.285	0.181	2.42143e-06
ST3GAL2	6.00459e-13	0.724849	2.52974e-28	0.982419	0.623	0.405	6.47261e-24	2.43684e-28	0.973679	0.593	0.368	6.23491e-24	2.34683e-17	0.724849	0.574	0.414	6.00459e-13
SMARCA1	9.85998e-08	0.722498	1.04268e-14	0.857623	0.389	0.235	2.6678e-10	1.8938e-13	0.937265	0.335	0.198	4.84548e-09	3.85366e-12	0.722498	0.35	0.226	9.85998e-08
SYNE2	5.56746e-130	0.718322	3.77514e-188	1.19917	1	0.997	9.65907e-184	1.21333e-191	1.19854	1	0.997	3.10443e-187	2.17598e-134	0.718322	1	1	5.56746e-130
PYGL	2.06135e-34	0.714268	4.67062e-59	0.925301	0.966	0.855	1.19502e-54	8.05655e-39	0.714268	0.931	0.844	2.06135e-34	1.52096e-54	0.791513	0.966	0.867	3.89153e-50
TNFSF13B	0.000347382	0.711575	3.90695e-10	0.711575	0.346	0.221	9.99633e-06	2.05538e-11	0.999541	0.289	0.171	5.2589e-07	1.3577e-08	0.783589	0.264	0.174	0.000347382
CCDC198	7.44001e-14	0.700977	1.99522e-59	1.27713	0.715	0.37	5.10498e-55	1.01929e-27	0.948338	0.589	0.361	2.60794e-23	2.90784e-18	0.700977	0.552	0.381	7.44001e-14
AL359232.1	3.20172e-10	0.700201	1.04788e-20	0.933046	0.652	0.49	2.68111e-16	2.23633e-16	0.857618	0.652	0.508	5.72188e-12	1.25136e-14	0.700201	0.654	0.523	3.20172e-10
GK5	3.40721e-27	0.698579	3.03315e-34	0.776233	0.897	0.788	7.76061e-30	4.26317e-33	0.722159	0.902	0.766	1.09078e-28	1.33167e-31	0.698579	0.828	0.704	3.40721e-27
LINC00511	4.49549e-77	0.696902	2.4084e-94	0.922251	1	0.971	6.16212e-90	3.90047e-112	0.95409	1	0.977	9.97975e-108	1.75701e-81	0.696902	1	0.988	4.49549e-77
PBX1	1.82391e-14	0.696629	3.28408e-22	0.769829	0.733	0.556	8.40265e-18	7.12854e-19	0.696629	0.732	0.56	1.82391e-14	3.42207e-34	0.885502	0.748	0.557	8.75572e-30
FGFR2	9.491e-13	0.696041	3.45436e-46	1.12156	0.694	0.384	8.83833e-42	3.70945e-17	0.71294	0.628	0.464	9.491e-13	3.97894e-18	0.696041	0.542	0.375	1.01805e-13
RNF220	5.58919e-18	0.694412	6.67769e-36	1.04005	0.826	0.695	1.70855e-31	2.18447e-22	0.784947	0.817	0.687	5.58919e-18	2.57335e-23	0.694412	0.812	0.73	6.58418e-19
TSPOAP1-AS1	2.79511e-15	0.693462	1.27248e-47	1.09753	0.806	0.57	3.25576e-43	5.1778e-42	0.958256	0.795	0.558	1.32479e-37	1.09244e-19	0.693462	0.681	0.541	2.79511e-15
ESR2	1.02728e-12	0.693028	2.97251e-52	1.30867	0.666	0.359	7.60545e-48	2.69306e-44	1.15446	0.64	0.349	6.89046e-40	4.01502e-17	0.693028	0.534	0.373	1.02728e-12
GMDS	3.71442e-115	0.690646	3.72101e-134	0.844157	1	1	9.52058e-130	1.45174e-119	0.751113	1	1	3.71442e-115	2.58393e-142	0.690646	1	1	6.61124e-138
PDE5A	7.51794e-11	0.688912	1.01889e-27	0.808263	0.715	0.497	2.60693e-23	4.96422e-26	0.86983	0.679	0.473	1.27015e-21	2.9383e-15	0.688912	0.592	0.469	7.51794e-11
SCML1	7.53649e-08	0.685705	1.09453e-39	1.06331	0.773	0.576	2.80048e-35	1.20384e-42	1.10381	0.758	0.56	3.08015e-38	2.94555e-12	0.685705	0.581	0.491	7.53649e-08
MAP3K20	2.66838e-39	0.685123	5.02092e-127	1.54717	0.962	0.657	1.28465e-122	3.96728e-120	1.48131	0.97	0.713	1.01507e-115	1.04291e-43	0.685123	0.947	0.851	2.66838e-39
PRSS23	1.44036e-05	0.682554	1.63455e-36	1.50709	0.46	0.219	4.18215e-32	2.07509e-42	1.49748	0.516	0.258	5.30933e-38	5.62948e-10	0.682554	0.38	0.268	1.44036e-05
RNF43	3.93428e-51	0.680407	1.46914e-95	1.10087	0.996	0.954	3.75894e-91	6.03542e-98	1.04458	0.996	0.951	1.54422e-93	1.53767e-55	0.680407	0.997	0.964	3.93428e-51
GPHN	3.29039e-65	0.67839	9.25735e-132	1.31348	1	0.998	2.36859e-127	3.56905e-142	1.38452	1	0.998	9.13178e-138	1.28601e-69	0.67839	1	1	3.29039e-65
HDAC4	6.87418e-62	0.677822	5.25596e-76	0.98907	0.966	0.841	1.34479e-71	2.68669e-66	0.922786	0.97	0.868	6.87418e-62	5.18099e-81	0.677822	0.998	0.969	1.32561e-76
RGL1	1.05991e-15	0.676885	1.81053e-33	1.06544	0.563	0.305	4.63243e-29	4.14253e-20	0.676885	0.577	0.356	1.05991e-15	2.39693e-20	0.708721	0.647	0.487	6.13279e-16
POC1B-AS1	5.84247e-08	0.675801	1.75318e-30	0.979467	0.662	0.432	4.48568e-26	3.91809e-28	0.886879	0.634	0.402	1.00248e-23	2.28347e-12	0.675801	0.484	0.36	5.84247e-08
TNFSF10	5.66904e-06	0.675152	2.21568e-10	0.736914	0.441	0.318	5.66904e-06	2.75665e-14	0.809453	0.429	0.276	7.05317e-10	6.27712e-12	0.675152	0.414	0.289	1.60607e-07
SELENBP1	7.79053e-06	0.673436	2.18505e-19	0.742111	0.577	0.385	5.59067e-15	2.10091e-25	1.03531	0.502	0.29	5.37539e-21	3.04484e-10	0.673436	0.33	0.22	7.79053e-06
DYNC2H1	0.000254805	0.672186	1.55982e-13	1.22363	0.287	0.163	3.99096e-09	4.10809e-10	0.759483	0.315	0.197	1.0511e-05	9.95875e-09	0.672186	0.341	0.24	0.000254805
MFHAS1	6.00127e-19	0.671789	4.87975e-68	1.13467	0.913	0.71	1.24853e-63	3.29617e-43	0.909728	0.902	0.742	8.43357e-39	2.34553e-23	0.671789	0.822	0.734	6.00127e-19
CPVL	2.15443e-13	0.670852	2.77429e-113	1.69163	0.852	0.398	7.0983e-109	5.86074e-100	1.58801	0.841	0.433	1.49953e-95	8.42036e-18	0.670852	0.65	0.515	2.15443e-13
DGKG	0.0112679	0.66955	2.94527e-21	1.35262	0.334	0.167	7.53577e-17	4.40395e-07	0.66955	0.327	0.23	0.0112679	1.09794e-18	0.900829	0.377	0.221	2.80918e-14
REPS2	2.00519e-06	0.665628	4.46234e-18	0.756021	0.555	0.374	1.14173e-13	7.83707e-11	0.665628	0.461	0.332	2.00519e-06	2.02618e-13	0.881392	0.353	0.231	5.18417e-09
ZNF618	3.32339e-10	0.665424	1.18866e-34	1.03842	0.625	0.364	3.0413e-30	1.29891e-14	0.699846	0.557	0.405	3.32339e-10	1.01868e-17	0.665424	0.615	0.462	2.60639e-13
KCNN4	3.04279e-20	0.664957	4.06267e-34	0.68492	0.909	0.793	1.03947e-29	1.18924e-24	0.675577	0.839	0.771	3.04279e-20	3.09064e-30	0.664957	0.835	0.723	7.90772e-26
AP004608.1	5.14156e-05	0.662179	2.00952e-09	0.662179	0.356	0.235	5.14156e-05	4.32733e-10	0.765279	0.325	0.206	1.10719e-05	1.31019e-16	0.931131	0.332	0.194	3.35226e-12
CCND3	0.00025048	0.660717	9.78972e-09	0.660717	0.494	0.387	0.00025048	7.29571e-09	0.722063	0.486	0.38	0.000186668	5.38129e-13	0.671281	0.55	0.436	1.37686e-08
TET1	0.000241576	0.66035	1.59583e-24	1.19487	0.447	0.245	4.08308e-20	1.29958e-11	0.839462	0.388	0.255	3.3251e-07	9.44173e-09	0.66035	0.333	0.233	0.000241576
SHANK2	1.29649e-47	0.658051	4.61606e-67	0.955717	0.972	0.824	1.18107e-62	1.84865e-58	0.835108	0.965	0.813	4.72995e-54	5.06718e-52	0.658051	0.972	0.905	1.29649e-47
ATP9A	7.71623e-25	0.655011	1.32138e-75	1.1949	0.903	0.648	3.38088e-71	1.33827e-79	1.19603	0.915	0.631	3.42411e-75	3.0158e-29	0.655011	0.845	0.72	7.71623e-25
RORC	0.0029837	0.651901	7.09191e-08	0.705049	0.312	0.21	0.00181453	5.577e-09	0.725799	0.285	0.179	0.000142693	1.16615e-07	0.651901	0.264	0.178	0.0029837
CDK6	7.09196e-39	0.65145	1.05794e-50	0.762674	0.986	0.948	2.70686e-46	2.77181e-43	0.699015	0.992	0.94	7.09196e-39	1.10265e-48	0.65145	0.992	0.965	2.82123e-44
PRKN	2.95681e-07	0.651224	1.85258e-20	0.824065	0.642	0.463	4.74001e-16	1.15564e-11	0.651224	0.581	0.458	2.95681e-07	1.93957e-17	0.783281	0.6	0.468	4.96258e-13
RAB15	7.31555e-07	0.64764	4.39457e-19	0.915285	0.488	0.311	1.12439e-14	4.29839e-24	1.05785	0.512	0.313	1.09978e-19	2.8592e-11	0.64764	0.424	0.301	7.31555e-07
CSRNP3	2.06629e-05	0.644389	1.68185e-26	1.20921	0.447	0.238	4.30319e-22	7.62543e-21	0.885866	0.469	0.267	1.95104e-16	8.07586e-10	0.644389	0.469	0.362	2.06629e-05
DHRSX	1.8001e-30	0.639067	7.13115e-57	0.893565	0.958	0.867	1.82458e-52	1.13293e-69	0.916066	0.988	0.876	2.89872e-65	7.03551e-35	0.639067	0.948	0.9	1.8001e-30
GALNT10	2.21388e-34	0.638869	9.34841e-64	1.04047	0.955	0.838	2.39188e-59	2.93243e-61	0.921517	0.961	0.856	7.50291e-57	8.6527e-39	0.638869	0.943	0.864	2.21388e-34
KCNQ1	1.48017e-47	0.638544	2.76516e-93	0.989805	0.984	0.903	7.07495e-89	1.21091e-88	0.942111	0.986	0.903	3.09822e-84	5.78508e-52	0.638544	0.969	0.918	1.48017e-47
C1orf21	2.64306e-30	0.638001	1.03301e-34	0.638001	0.982	0.895	2.64306e-30	2.52363e-42	0.669335	0.972	0.883	6.45696e-38	1.94426e-44	0.730924	0.927	0.805	4.97459e-40
CCSER1	9.41689e-39	0.635519	3.68048e-43	0.635519	1	0.981	9.41689e-39	2.12802e-70	0.845556	0.996	0.974	5.44475e-66	1.57359e-60	0.782639	0.992	0.959	4.0262e-56
KLHL24	5.92307e-13	0.635162	1.00214e-49	0.966263	0.868	0.635	2.56406e-45	1.69796e-38	0.857238	0.805	0.607	4.34441e-34	2.31497e-17	0.635162	0.649	0.499	5.92307e-13
RNF125	7.37623e-05	0.633398	1.46843e-38	1.15016	0.668	0.409	3.75713e-34	1.34517e-33	1.08047	0.654	0.424	3.44176e-29	2.88292e-09	0.633398	0.526	0.422	7.37623e-05
WNK2	1.65017e-10	0.63319	4.74649e-23	0.822056	0.573	0.348	1.21444e-18	6.44951e-15	0.63319	0.604	0.43	1.65017e-10	3.21027e-26	0.776491	0.667	0.484	8.21379e-22
TRIO	5.81492e-97	0.630907	1.62704e-156	1.01676	1	0.996	4.16295e-152	4.54446e-158	1.00194	1	0.995	1.16275e-153	2.2727e-101	0.630907	1	0.998	5.81492e-97
SAT1	1.72991e-44	0.628658	4.67277e-59	0.7387	0.998	0.987	1.19557e-54	8.23432e-80	0.841703	1	0.986	2.10683e-75	6.76115e-49	0.628658	0.994	0.988	1.72991e-44
TSC22D1	1.61019e-53	0.626494	3.00199e-118	1.0837	1	0.945	7.68089e-114	1.2958e-108	1.06959	0.992	0.952	3.31544e-104	6.29324e-58	0.626494	0.982	0.952	1.61019e-53
ADAMTS14	9.25807e-05	0.625571	1.55744e-18	1.16344	0.267	0.124	3.98487e-14	3.32708e-10	0.887867	0.26	0.153	8.51266e-06	3.61841e-09	0.625571	0.377	0.271	9.25807e-05
STOX2	2.9475e-19	0.625036	3.81894e-25	0.811757	0.804	0.68	9.77114e-21	1.152e-23	0.680591	0.805	0.671	2.9475e-19	3.78315e-24	0.625036	0.854	0.752	9.67957e-20
AC090015.1	0.00502234	0.623441	1.20997e-10	0.748163	0.453	0.33	3.09584e-06	1.96293e-07	0.623441	0.441	0.339	0.00502234	3.48091e-14	0.685902	0.534	0.405	8.90625e-10
GCNT1	6.97003e-05	0.621067	1.17823e-17	0.621067	0.69	0.523	3.01462e-13	3.55703e-20	0.738284	0.644	0.443	9.10101e-16	2.72416e-09	0.652598	0.387	0.281	6.97003e-05
FOXN3	4.84854e-12	0.620066	2.64894e-40	1.0093	0.808	0.617	6.77758e-36	3.80461e-39	0.885823	0.854	0.638	9.73448e-35	1.895e-16	0.620066	0.738	0.636	4.84854e-12
ROR1	2.08623e-22	0.618423	1.14971e-45	0.862055	0.955	0.857	2.94165e-41	7.20111e-61	0.951256	0.955	0.845	1.84248e-56	8.1538e-27	0.618423	0.903	0.841	2.08623e-22
LINC00923	1.13143e-11	0.616239	1.7877e-23	0.879301	0.658	0.444	4.57401e-19	4.76267e-32	0.991499	0.717	0.503	1.21858e-27	4.42205e-16	0.616239	0.709	0.614	1.13143e-11
ARRB1	9.2717e-17	0.6158	2.22702e-25	0.641642	0.846	0.714	5.69805e-21	8.43519e-25	0.6158	0.841	0.647	2.15823e-20	3.62374e-21	0.656123	0.738	0.617	9.2717e-17
ACACB	6.61645e-10	0.61358	5.51612e-37	1.00855	0.741	0.513	1.41135e-32	2.77809e-34	0.887444	0.75	0.504	7.10801e-30	2.58596e-14	0.61358	0.66	0.541	6.61645e-10
CHD6	6.04145e-44	0.612585	6.22549e-86	0.9757	0.97	0.859	1.59285e-81	6.08085e-71	0.884835	0.963	0.88	1.55585e-66	2.36123e-48	0.612585	0.972	0.917	6.04145e-44
GANC	0.000280533	0.612115	1.00217e-14	0.755176	0.549	0.388	2.56414e-10	7.37623e-18	0.846645	0.555	0.379	1.88728e-13	1.09643e-08	0.612115	0.422	0.323	0.000280533
GPC4	9.8125e-08	0.609582	7.64185e-21	0.768597	0.623	0.419	1.95525e-16	3.83511e-12	0.703723	0.583	0.442	9.8125e-08	4.14998e-13	0.609582	0.553	0.412	1.06181e-08
NT5DC3	1.55851e-19	0.608954	1.60703e-36	0.873995	0.919	0.801	4.11175e-32	6.09125e-24	0.671821	0.947	0.896	1.55851e-19	3.23324e-29	0.608954	0.942	0.863	8.27258e-25
NR6A1	9.56975e-15	0.604781	1.28213e-36	0.765025	0.947	0.84	3.28046e-32	3.74023e-19	0.604781	0.9	0.842	9.56975e-15	1.52863e-28	0.61502	0.945	0.877	3.91115e-24
UTP20	2.1852e-16	0.604418	8.54062e-21	0.604418	0.798	0.645	2.1852e-16	1.88089e-24	0.662857	0.809	0.677	4.81244e-20	1.78383e-25	0.616926	0.835	0.732	4.56412e-21
SERINC5	4.97125e-39	0.603726	8.46108e-70	0.84713	0.99	0.951	2.16485e-65	8.45751e-71	0.917039	0.996	0.951	2.16394e-66	1.94296e-43	0.603726	0.977	0.948	4.97125e-39
ACTR3C	1.72621e-12	0.602573	3.95458e-28	0.815655	0.773	0.58	1.01182e-23	2.17787e-25	0.793949	0.76	0.588	5.5723e-21	6.74669e-17	0.602573	0.681	0.553	1.72621e-12
ZFPM1	7.94859e-05	0.60199	7.94036e-30	1.02298	0.634	0.416	2.03162e-25	2.34954e-20	0.906939	0.612	0.441	6.01153e-16	3.10662e-09	0.60199	0.492	0.394	7.94859e-05
AC104958.1	0.020014	0.599914	2.96191e-25	1.35603	0.348	0.163	7.57833e-21	1.19213e-18	1.13676	0.319	0.165	3.05017e-14	7.82223e-07	0.599914	0.282	0.198	0.020014
TSHZ1	0.000944087	0.598679	4.07727e-26	0.972846	0.654	0.467	1.04321e-21	9.87264e-18	0.82284	0.632	0.482	2.52601e-13	3.68986e-08	0.598679	0.511	0.417	0.000944087
MACROD2	0.000194529	0.597854	7.60294e-09	0.668888	0.662	0.602	0.000194529	7.01964e-11	0.597854	0.701	0.603	1.79605e-06	1.02515e-28	0.795759	0.809	0.66	2.62294e-24
GCH1	0.00525537	0.596347	1.8427e-16	0.725439	0.575	0.403	4.71474e-12	2.054e-07	0.613808	0.541	0.434	0.00525537	4.43009e-10	0.596347	0.502	0.394	1.13348e-05
CLDN2	5.84882e-20	0.593083	2.63238e-27	0.593083	0.925	0.855	6.7352e-23	2.28595e-24	0.599797	0.931	0.839	5.84882e-20	1.46071e-29	0.674162	0.866	0.761	3.73738e-25
LINC00862	0.0132159	0.591846	5.16528e-07	0.591846	0.366	0.266	0.0132159	8.89264e-09	0.719568	0.341	0.229	0.000227527	5.75226e-10	0.648556	0.379	0.265	1.47177e-05
TTC39B	3.00738e-12	0.589622	5.04306e-41	0.895084	0.875	0.693	1.29032e-36	6.72248e-44	0.980739	0.862	0.675	1.72001e-39	1.1754e-16	0.589622	0.801	0.729	3.00738e-12
YAP1	6.09923e-64	0.587167	1.45488e-103	0.942119	1	0.966	3.72244e-99	2.74406e-90	0.850909	1	0.964	7.02095e-86	2.38381e-68	0.587167	0.998	0.992	6.09923e-64
TIAM2	2.42027e-05	0.585873	3.31137e-23	0.752918	0.706	0.493	8.47248e-19	1.72659e-26	0.958715	0.644	0.439	4.41764e-22	9.45935e-10	0.585873	0.549	0.44	2.42027e-05
LIMK2	3.87576e-20	0.584491	3.28393e-39	0.756831	0.915	0.778	8.40227e-35	1.5148e-24	0.584491	0.896	0.785	3.87576e-20	1.77542e-43	0.813577	0.888	0.737	4.54258e-39
TANC2	0.00763135	0.583744	2.0627e-12	0.755888	0.466	0.326	5.27762e-08	2.98263e-07	0.658839	0.439	0.335	0.00763135	2.66533e-10	0.583744	0.557	0.446	6.81951e-06
RAB11FIP3	2.86455e-11	0.581647	1.80289e-28	0.891616	0.668	0.452	4.61288e-24	1.94626e-19	0.682606	0.642	0.469	4.97971e-15	1.11958e-15	0.581647	0.618	0.478	2.86455e-11
TEX9	0.00105224	0.57752	5.4306e-14	0.693774	0.603	0.442	1.38947e-09	4.11256e-08	0.584103	0.571	0.477	0.00105224	7.52686e-10	0.57752	0.518	0.408	1.92582e-05
KANSL1L	4.8731e-24	0.577339	6.4731e-40	0.786288	0.917	0.773	1.65621e-35	1.13922e-55	0.892272	0.937	0.737	2.9148e-51	1.9046e-28	0.577339	0.924	0.843	4.8731e-24
SMOC1	1.4843e-21	0.577292	4.00851e-60	0.996589	0.905	0.662	1.02562e-55	4.94323e-42	0.776918	0.886	0.676	1.26477e-37	5.80121e-26	0.577292	0.862	0.716	1.4843e-21
NEIL1	5.56449e-05	0.576474	6.25829e-19	0.881629	0.51	0.331	1.60125e-14	2.17482e-09	0.576474	0.429	0.302	5.56449e-05	1.92487e-11	0.681124	0.379	0.255	4.92498e-07
SASH1	6.30357e-15	0.575938	2.90332e-25	0.704596	0.816	0.664	7.42842e-21	6.19606e-25	0.642949	0.843	0.693	1.58532e-20	2.46368e-19	0.575938	0.777	0.664	6.30357e-15
SUMF1	1.79389e-11	0.575737	1.64363e-19	0.651318	0.794	0.658	4.2054e-15	7.01122e-16	0.57929	0.797	0.675	1.79389e-11	2.01565e-16	0.575737	0.762	0.652	5.15724e-12
AC060780.1	0.0109082	0.575276	1.64216e-08	0.613011	0.409	0.291	0.000420162	4.26337e-07	0.589701	0.354	0.251	0.0109082	2.85448e-07	0.575276	0.328	0.239	0.00730346
ANK3	9.21578e-34	0.572515	2.84723e-39	0.644854	0.972	0.929	7.28492e-35	3.60188e-38	0.581887	0.984	0.929	9.21578e-34	2.26236e-45	0.572515	0.989	0.946	5.78848e-41
NFIA	1.93123e-27	0.572177	2.50728e-49	0.762565	0.957	0.872	6.41512e-45	2.93784e-38	0.648177	0.963	0.887	7.51675e-34	7.54798e-32	0.572177	0.935	0.851	1.93123e-27
TSGA10	3.6106e-09	0.57145	3.77674e-23	0.734618	0.763	0.603	9.66317e-19	1.41116e-13	0.57145	0.734	0.613	3.6106e-09	1.77318e-21	0.592606	0.794	0.675	4.53686e-17
PTPRN2	5.24493e-58	0.570769	2.04992e-62	0.627406	0.998	0.994	5.24493e-58	1.83266e-63	0.570769	1	0.993	4.68903e-59	5.14427e-79	0.594116	1	0.995	1.31621e-74
RALGAPA2	4.98257e-26	0.569643	6.2297e-35	0.569643	0.974	0.917	1.59393e-30	1.94738e-30	0.579179	0.97	0.914	4.98257e-26	2.12222e-107	1.01702	0.987	0.94	5.42991e-103
SYBU	2.51589e-23	0.567661	2.37446e-55	0.989431	0.931	0.798	6.07529e-51	8.80868e-44	0.841821	0.959	0.842	2.25379e-39	9.83309e-28	0.567661	0.922	0.852	2.51589e-23
ZKSCAN1	1.3465e-53	0.564467	1.04097e-70	0.687557	0.992	0.97	2.66343e-66	7.98433e-85	0.759975	0.998	0.963	2.04287e-80	5.26265e-58	0.564467	0.997	0.968	1.3465e-53
SPEF2	1.11108e-05	0.563995	2.02346e-19	0.75037	0.617	0.412	5.17722e-15	4.34253e-10	0.563995	0.594	0.47	1.11108e-05	4.65112e-12	0.579786	0.579	0.454	1.19004e-07
LDLRAD3	1.03107e-14	0.560928	2.97173e-32	1.00136	0.735	0.508	7.60347e-28	2.33554e-36	0.910498	0.803	0.586	5.9757e-32	4.02982e-19	0.560928	0.79	0.678	1.03107e-14
TOX3	1.93765e-28	0.560374	1.06233e-44	0.649915	0.994	0.977	2.71807e-40	5.4422e-69	0.837667	0.996	0.967	1.39244e-64	7.57307e-33	0.560374	0.985	0.966	1.93765e-28
PDE4D	1.78118e-68	0.557576	2.90693e-74	0.611369	1	0.998	7.43767e-70	3.31664e-78	0.61922	1	0.996	8.48594e-74	6.96155e-73	0.557576	1	0.997	1.78118e-68
AL591895.1	3.15894e-14	0.556447	1.23464e-18	0.556447	0.8	0.646	3.15894e-14	2.94774e-20	0.634859	0.756	0.601	7.54209e-16	1.07195e-25	0.695215	0.752	0.588	2.7427e-21
C4orf19	3.91378e-06	0.553154	3.51533e-26	0.729532	0.874	0.765	8.99432e-22	3.15445e-23	0.689451	0.854	0.738	8.07099e-19	1.52966e-10	0.553154	0.727	0.665	3.91378e-06
NIN	1.20143e-26	0.551712	3.65221e-45	0.787935	0.966	0.912	9.34454e-41	1.36999e-44	0.664414	0.965	0.913	3.50524e-40	4.69564e-31	0.551712	0.969	0.943	1.20143e-26
GRIP1	7.97255e-08	0.550029	2.88085e-15	0.702144	0.688	0.548	7.37095e-11	3.11598e-12	0.550029	0.689	0.545	7.97255e-08	3.22362e-16	0.616738	0.72	0.599	8.24796e-12
EHF	5.7891e-48	0.547173	9.37542e-132	1.08458	0.998	0.984	2.3988e-127	1.56523e-129	1.05138	1	0.982	4.00481e-125	2.2626e-52	0.547173	0.998	0.996	5.7891e-48
TBC1D4	2.21686e-10	0.545642	1.50524e-18	0.65504	0.792	0.64	3.85131e-14	3.57165e-24	0.716771	0.815	0.659	9.13842e-20	8.66436e-15	0.545642	0.731	0.65	2.21686e-10
PTPRG	4.14963e-18	0.54447	3.79722e-44	0.819426	0.935	0.796	9.71556e-40	3.74606e-43	0.786037	0.929	0.833	9.58467e-39	1.62184e-22	0.54447	0.908	0.826	4.14963e-18
KLHL23	1.40206e-26	0.544366	2.81949e-34	0.667367	0.901	0.747	7.21393e-30	5.47979e-31	0.655706	0.904	0.753	1.40206e-26	2.27404e-34	0.544366	0.935	0.844	5.81837e-30
SH3BP4	1.26837e-16	0.544103	1.23009e-28	0.780771	0.834	0.736	3.14732e-24	1.34112e-36	0.927695	0.86	0.742	3.4314e-32	4.95728e-21	0.544103	0.864	0.796	1.26837e-16
CD46	1.37814e-101	0.543966	3.87351e-114	0.625469	1	1	9.91075e-110	3.00614e-151	0.77338	1	0.999	7.6915e-147	5.38631e-106	0.543966	1	1	1.37814e-101
SCG5	0.000108905	0.53897	4.25643e-09	0.576406	0.445	0.322	0.000108905	7.36139e-10	0.539303	0.482	0.351	1.88349e-05	1.61426e-11	0.53897	0.552	0.42	4.13025e-07
SLC2A13	1.92794e-13	0.535072	2.05653e-20	0.613073	0.846	0.744	5.26184e-16	5.40645e-25	0.617304	0.878	0.731	1.38329e-20	7.53515e-18	0.535072	0.728	0.622	1.92794e-13
MLEC	3.40794e-69	0.53396	5.33491e-84	0.616965	1	0.998	1.36499e-79	9.38207e-112	0.70415	1	1	2.4005e-107	1.33195e-73	0.53396	1	0.998	3.40794e-69
BCAS3	3.88094e-19	0.533886	2.51961e-29	0.750348	0.891	0.73	6.44666e-25	2.73103e-30	0.738207	0.894	0.762	6.98761e-26	1.51682e-23	0.533886	0.921	0.855	3.88094e-19
USP9Y	2.84042e-14	0.532261	8.86383e-29	0.622488	0.903	0.775	2.2679e-24	1.11015e-18	0.532261	0.886	0.789	2.84042e-14	2.09287e-23	0.571576	0.861	0.793	5.35481e-19
TGFBI	8.17192e-16	0.528971	5.06832e-31	0.743182	0.806	0.58	1.29678e-26	2.88648e-22	0.739532	0.699	0.513	7.38535e-18	3.1939e-20	0.528971	0.778	0.637	8.17192e-16
RASA1	1.71694e-26	0.52878	6.71046e-31	0.52878	0.974	0.923	1.71694e-26	5.50158e-37	0.591155	0.97	0.909	1.40763e-32	3.37477e-36	0.565743	0.95	0.91	8.63468e-32
BTBD3	3.73031e-08	0.527843	2.15413e-14	0.561644	0.658	0.498	5.51156e-10	1.45795e-12	0.527843	0.638	0.486	3.73031e-08	1.1213e-34	0.840881	0.739	0.56	2.86895e-30
IQCH-AS1	2.52107e-05	0.52751	5.13064e-10	0.52751	0.666	0.546	1.31273e-05	9.85332e-10	0.564509	0.661	0.561	2.52107e-05	1.11591e-10	0.542328	0.652	0.55	2.85516e-06
PCAT1	7.21893e-09	0.527137	5.2883e-23	1.03672	0.787	0.674	1.35306e-18	7.22663e-22	0.830787	0.817	0.716	1.84901e-17	2.82144e-13	0.527137	0.837	0.802	7.21893e-09
ZBTB20	6.00425e-49	0.526906	6.69123e-54	0.5911	1	0.983	1.71202e-49	3.13784e-57	0.622585	1	0.972	8.02847e-53	2.3467e-53	0.526906	1	0.983	6.00425e-49
PGAP1	7.15437e-08	0.525431	5.50098e-40	0.986828	0.812	0.609	1.40748e-35	8.70944e-27	0.868304	0.791	0.627	2.2284e-22	2.7962e-12	0.525431	0.717	0.621	7.15437e-08
RIMBP2	0.00648444	0.523054	2.03346e-21	0.867784	0.516	0.314	5.20282e-17	2.53437e-07	0.523054	0.469	0.37	0.00648444	3.24794e-22	0.704671	0.663	0.483	8.31018e-18
MIR181A2HG	0.000152734	0.520396	2.25123e-11	0.626747	0.545	0.402	5.75999e-07	2.3146e-09	0.559779	0.502	0.377	5.92214e-05	5.96942e-09	0.520396	0.513	0.401	0.000152734
MTURN	0.00348759	0.519783	5.69975e-13	0.713859	0.48	0.326	1.45834e-08	2.75411e-14	0.788365	0.469	0.32	7.04668e-10	1.36308e-07	0.519783	0.416	0.315	0.00348759
CAMK2D	1.64952e-40	0.519536	6.44698e-45	0.519536	1	0.991	1.64952e-40	6.38265e-52	0.559098	0.998	0.991	1.63306e-47	5.66567e-57	0.563691	0.998	0.986	1.44962e-52
AGAP1	6.48867e-47	0.519118	2.53602e-51	0.590389	1	0.997	6.48867e-47	1.79403e-52	0.554871	1	0.999	4.59021e-48	1.28382e-86	0.519118	1	0.999	3.28478e-82
SPRY2	0.00166102	0.518841	1.33112e-12	0.55615	0.599	0.449	3.40582e-08	1.38785e-09	0.518841	0.549	0.417	3.55096e-05	6.4919e-08	0.608226	0.364	0.266	0.00166102
ZNF516	3.44294e-08	0.518044	1.34563e-12	0.570974	0.676	0.553	3.44294e-08	1.59942e-13	0.519958	0.703	0.56	4.09227e-09	7.72987e-13	0.518044	0.704	0.599	1.97776e-08
IMMP2L	5.4657e-23	0.515914	5.34851e-29	0.624012	0.97	0.892	1.36847e-24	2.13621e-27	0.545764	0.974	0.907	5.4657e-23	3.38831e-34	0.515914	0.984	0.926	8.66933e-30
FYN	1.95602e-28	0.512304	3.82298e-50	0.763525	0.964	0.799	9.78149e-46	2.63981e-37	0.675024	0.937	0.823	6.75422e-33	7.64489e-33	0.512304	0.94	0.862	1.95602e-28
FMNL2	0.00249985	0.511464	7.24252e-11	0.571592	0.779	0.705	1.85307e-06	9.77036e-08	0.511464	0.774	0.73	0.00249985	1.62776e-20	0.522273	0.854	0.759	4.16478e-16
SOX9	1.3325e-24	0.511453	4.67596e-72	0.876022	0.984	0.881	1.19639e-67	1.99111e-73	0.926062	0.978	0.898	5.09445e-69	5.20794e-29	0.511453	0.968	0.906	1.3325e-24
TFDP2	4.12326e-21	0.509114	4.37467e-48	0.713954	0.978	0.904	1.1193e-43	1.61153e-25	0.509114	0.97	0.918	4.12326e-21	2.28881e-32	0.515831	0.968	0.902	5.85615e-28
CCDC146	3.24401e-24	0.506958	6.40572e-36	0.616793	0.976	0.925	1.63897e-31	8.51517e-36	0.665563	0.974	0.889	2.17869e-31	1.26789e-28	0.506958	0.969	0.896	3.24401e-24
ELK4	3.7563e-09	0.506145	8.81539e-34	0.791046	0.808	0.607	2.25551e-29	2.17547e-19	0.643615	0.744	0.621	5.56615e-15	1.46811e-13	0.506145	0.691	0.584	3.7563e-09
TGFBR2	1.06131e-37	0.505159	3.87001e-45	0.585621	1	0.992	9.90182e-41	1.60274e-42	0.567018	0.996	0.991	4.10077e-38	4.14802e-42	0.505159	1	0.992	1.06131e-37
SH3D19	1.7245e-34	0.502881	1.19891e-52	0.577517	0.996	0.987	3.06752e-48	6.74e-39	0.51946	0.996	0.988	1.7245e-34	9.93922e-53	0.502881	0.998	0.993	2.54305e-48
DUSP16	1.04362e-10	0.501746	3.62559e-42	0.908701	0.866	0.68	9.27644e-38	3.11501e-39	0.939294	0.848	0.674	7.97005e-35	4.07885e-15	0.501746	0.812	0.709	1.04362e-10

## Sheet: Cluster_4
GENE	max.adj.pval	min.log2FC	IKK_ko_p_val	IKK_ko_avg_log2FC	IKK_ko_pct.1	IKK_ko_pct.2	IKK_ko_p_val_adj	IKK_ko_CLD_inh_p_val	IKK_ko_CLD_inh_avg_log2FC	IKK_ko_CLD_inh_pct.1	IKK_ko_CLD_inh_pct.2	IKK_ko_CLD_inh_p_val_adj	WT_p_val	WT_avg_log2FC	WT_pct.1	WT_pct.2	WT_p_val_adj
SEMA4A	2.66309e-57	2.81145	3.77262e-64	2.81145	0.509	0.143	9.65262e-60	1.04084e-61	2.94085	0.472	0.141	2.66309e-57	2.49021e-112	2.87716	0.487	0.138	6.37146e-108
EGR3	4.84058e-69	2.10439	1.89189e-73	2.26158	0.466	0.099	4.84058e-69	1.0832e-81	2.79392	0.412	0.08	2.77146e-77	2.18765e-81	2.10439	0.367	0.095	5.59731e-77
SYTL3	3.03225e-39	1.97569	1.18512e-43	2.13703	0.491	0.171	3.03225e-39	9.77734e-49	2.03728	0.444	0.141	2.50163e-44	1.18228e-56	1.97569	0.369	0.128	3.02498e-52
PRKCG	8.72898e-33	1.95085	1.5112e-47	2.14366	0.394	0.104	3.86656e-43	3.41162e-37	1.95085	0.341	0.104	8.72898e-33	1.73958e-68	2.08069	0.39	0.123	4.45089e-64
AC011379.1	1.27718e-43	1.87945	4.99173e-48	1.87945	0.484	0.149	1.27718e-43	4.53339e-84	2.38128	0.512	0.119	1.15991e-79	7.21446e-72	1.99765	0.367	0.105	1.84589e-67
SPDYA	3.74778e-48	1.8285	1.46478e-52	1.8285	0.627	0.238	3.74778e-48	1.10409e-73	2.07695	0.647	0.23	2.82492e-69	1.38332e-109	1.92583	0.671	0.273	3.53936e-105
AC096564.1	8.43796e-50	1.80694	3.29788e-54	1.9378	0.616	0.222	8.43796e-50	4.95301e-59	1.89507	0.622	0.239	1.26728e-54	1.66154e-86	1.80694	0.572	0.222	4.25122e-82
CDRT1	1.48281e-26	1.64361	3.52132e-41	2.00899	0.455	0.152	9.00964e-37	5.79538e-31	1.64361	0.378	0.142	1.48281e-26	4.83036e-55	1.7804	0.428	0.17	1.2359e-50
AL161430.1	1.89385e-39	1.5363	1.09276e-46	1.79934	0.545	0.196	2.79595e-42	7.40191e-44	1.5363	0.516	0.192	1.89385e-39	3.31764e-54	1.61131	0.447	0.185	8.48851e-50
LAMA3	1.68883e-23	1.49422	9.9732e-30	1.52839	0.925	0.81	2.55174e-25	6.60059e-28	1.49422	0.941	0.837	1.68883e-23	3.69049e-83	1.55947	0.969	0.902	9.44249e-79
ADAMTSL4-AS1	2.03538e-33	1.47593	7.95507e-38	1.47593	0.627	0.276	2.03538e-33	6.67413e-43	1.65037	0.613	0.287	1.70764e-38	1.43432e-72	1.5396	0.641	0.303	3.66984e-68
HBEGF	4.17277e-56	1.47026	7.20438e-67	1.89195	0.828	0.404	1.84331e-62	1.63088e-60	1.62063	0.787	0.386	4.17277e-56	6.9097e-83	1.47026	0.778	0.447	1.76792e-78
AC008569.1	1.46228e-18	1.42986	5.71516e-23	1.47903	0.366	0.146	1.46228e-18	1.27725e-29	1.59376	0.366	0.134	3.26798e-25	4.10786e-31	1.42986	0.303	0.128	1.05104e-26
EGR1	1.68212e-79	1.42351	3.66431e-87	1.82374	0.921	0.451	9.37549e-83	6.57437e-84	1.92208	0.866	0.451	1.68212e-79	4.31935e-125	1.42351	0.917	0.513	1.10515e-120
RFX2	3.22752e-80	1.41969	1.26144e-84	1.92212	0.91	0.481	3.22752e-80	1.1628e-92	1.99218	0.881	0.475	2.97513e-88	1.12978e-109	1.41969	0.905	0.63	2.89065e-105
FOSB	7.36139e-71	1.39051	1.84615e-83	1.81912	0.918	0.503	4.72355e-79	2.87711e-75	1.58515	0.919	0.53	7.36139e-71	1.02974e-115	1.39051	0.941	0.621	2.6347e-111
DNAH6	9.21884e-32	1.37328	1.64932e-44	1.97955	0.459	0.146	4.21996e-40	3.10988e-41	1.72838	0.459	0.167	7.95693e-37	3.60308e-36	1.37328	0.409	0.195	9.21884e-32
FAM222A	4.88769e-15	1.36723	1.9103e-19	1.36723	0.344	0.143	4.88769e-15	2.04175e-22	1.47628	0.341	0.141	5.22402e-18	2.81935e-27	1.45009	0.282	0.123	7.21359e-23
CD55	2.06858e-54	1.36586	3.84718e-61	1.56866	0.957	0.801	9.84338e-57	8.08482e-59	1.54615	0.931	0.763	2.06858e-54	1.38679e-90	1.36586	0.943	0.757	3.54824e-86
LINC01619	5.57985e-37	1.34823	2.90929e-71	2.01155	0.814	0.363	7.44371e-67	1.3253e-61	1.93971	0.728	0.333	3.39091e-57	2.18082e-41	1.34823	0.589	0.329	5.57985e-37
LINC01909	2.05713e-28	1.33825	6.90637e-40	1.72362	0.487	0.171	1.76707e-35	2.24988e-34	1.77122	0.422	0.162	5.75654e-30	8.04006e-33	1.33825	0.367	0.17	2.05713e-28
FOS	1.47638e-88	1.31041	5.77026e-93	1.53477	0.996	0.861	1.47638e-88	5.51309e-98	1.56558	0.994	0.841	1.41058e-93	6.49306e-149	1.31041	0.991	0.885	1.66131e-144
MARCH3	8.4696e-34	1.28454	3.91242e-41	1.58263	0.785	0.488	1.00103e-36	3.66408e-43	1.47876	0.766	0.456	9.37492e-39	3.31025e-38	1.28454	0.549	0.309	8.4696e-34
JUNB	3.38803e-32	1.26043	2.52974e-44	1.26043	0.864	0.547	6.47259e-40	1.32418e-36	1.33939	0.75	0.456	3.38803e-32	3.44004e-63	1.29178	0.763	0.48	8.80168e-59
ID1	4.9047e-30	1.2321	3.94757e-42	1.32192	0.803	0.472	1.01003e-37	1.91695e-34	1.50484	0.709	0.44	4.9047e-30	6.32991e-60	1.2321	0.776	0.498	1.61957e-55
AC020916.1	3.97337e-43	1.2268	2.26904e-54	1.56524	0.756	0.338	5.80557e-50	1.55295e-47	1.42413	0.694	0.326	3.97337e-43	1.18444e-64	1.2268	0.752	0.423	3.03052e-60
AVIL	2.64534e-19	1.22217	1.0339e-23	1.23915	0.52	0.255	2.64534e-19	2.7203e-26	1.27653	0.491	0.236	6.96017e-22	2.4692e-34	1.22217	0.463	0.239	6.3177e-30
CCDC40	3.02597e-26	1.21661	2.3659e-39	1.61042	0.563	0.231	6.0534e-35	2.53405e-51	1.67936	0.6	0.244	6.48363e-47	1.18267e-30	1.21661	0.461	0.255	3.02597e-26
ATF3	1.39031e-46	1.2091	1.01862e-57	1.69428	0.824	0.444	2.60625e-53	5.43388e-51	1.6265	0.772	0.431	1.39031e-46	2.44087e-56	1.2091	0.766	0.49	6.24522e-52
SGMS2	1.21341e-47	1.20771	4.74247e-52	1.33267	0.95	0.751	1.21341e-47	2.55071e-70	1.43632	0.95	0.739	6.52626e-66	3.1066e-84	1.20771	0.95	0.77	7.94854e-80
TUFT1	1.4098e-25	1.18329	5.51003e-30	1.23102	0.685	0.383	1.4098e-25	1.11363e-41	1.40003	0.694	0.367	2.84932e-37	1.06993e-36	1.18329	0.558	0.329	2.73753e-32
AGPAT4	2.69662e-13	1.1782	1.05394e-17	1.18384	0.538	0.311	2.69662e-13	1.8682e-24	1.295	0.553	0.311	4.77997e-20	6.75698e-47	1.1782	0.693	0.432	1.72884e-42
KLF6	8.95229e-59	1.17728	3.4989e-63	1.33854	0.971	0.771	8.95229e-59	4.82244e-77	1.35491	0.981	0.784	1.23387e-72	1.18799e-115	1.17728	0.986	0.837	3.03958e-111
IL6R	1.26362e-22	1.17079	4.93871e-27	1.59686	0.409	0.161	1.26362e-22	1.21697e-28	1.61995	0.475	0.232	3.11374e-24	9.58944e-29	1.17079	0.378	0.186	2.45355e-24
KRT15	2.05346e-06	1.16653	5.49306e-17	1.31208	0.452	0.245	1.40545e-12	8.02573e-11	1.16653	0.356	0.214	2.05346e-06	4.3887e-31	1.30934	0.388	0.193	1.12289e-26
ZNF487	4.80043e-17	1.16001	2.26782e-29	1.43223	0.548	0.262	5.80245e-25	1.87619e-21	1.3493	0.459	0.243	4.80043e-17	1.79232e-33	1.16001	0.48	0.261	4.58583e-29
MOK	1.75073e-41	1.13797	6.84252e-46	1.45021	0.781	0.423	1.75073e-41	1.49896e-52	1.47557	0.803	0.439	3.83524e-48	1.01434e-54	1.13797	0.742	0.47	2.5953e-50
AC093827.4	1.04834e-11	1.13618	4.09733e-16	1.34348	0.362	0.173	1.04834e-11	6.37926e-20	1.46178	0.359	0.167	1.6322e-15	4.24918e-20	1.13618	0.328	0.175	1.08719e-15
NR4A1	1.60723e-19	1.1286	6.28167e-24	1.31824	0.584	0.312	1.60723e-19	1.21595e-28	1.38881	0.528	0.26	3.11113e-24	1.72919e-29	1.1286	0.544	0.338	4.42432e-25
WNT2B	1.12182e-07	1.12759	1.23475e-22	1.12759	0.538	0.271	3.15922e-18	4.38451e-12	1.15676	0.338	0.189	1.12182e-07	2.01252e-24	1.33584	0.3	0.143	5.14924e-20
GAS7	7.05921e-22	1.12478	5.06682e-30	1.64605	0.462	0.19	1.2964e-25	2.20446e-31	1.50009	0.456	0.194	5.64034e-27	2.75901e-26	1.12478	0.459	0.265	7.05921e-22
CRY1	1.11675e-64	1.08817	4.36469e-69	1.59841	0.968	0.768	1.11675e-64	3.00336e-77	1.60941	0.959	0.797	7.6844e-73	8.40145e-80	1.08817	0.955	0.844	2.14959e-75
SAMD4A	8.15438e-39	1.06828	3.18705e-43	1.26778	0.921	0.707	8.15438e-39	9.32973e-55	1.33201	0.925	0.685	2.3871e-50	5.15474e-81	1.06828	0.936	0.759	1.31889e-76
RHPN2	7.65995e-56	1.0675	2.99381e-60	1.28152	0.971	0.817	7.65995e-56	2.87867e-79	1.37184	0.981	0.817	7.36538e-75	3.14238e-104	1.0675	0.984	0.872	8.04008e-100
DUSP1	4.18745e-38	1.06688	1.63662e-42	1.34888	0.76	0.392	4.18745e-38	3.15685e-43	1.29076	0.703	0.344	8.07711e-39	2.6506e-61	1.06688	0.771	0.442	6.78182e-57
KLF2	1.94415e-28	1.06171	1.09902e-36	1.25027	0.846	0.601	2.81194e-32	7.59849e-33	1.13442	0.841	0.589	1.94415e-28	4.68889e-59	1.06171	0.858	0.623	1.1997e-54
DUSP10	6.28955e-07	1.04469	2.4582e-11	1.04469	0.398	0.232	6.28955e-07	3.13859e-13	1.06828	0.381	0.216	8.03039e-09	2.36036e-21	1.06532	0.371	0.203	6.03923e-17
PER2	1.01682e-64	1.04263	3.97413e-69	1.50587	0.953	0.662	1.01682e-64	1.01074e-83	1.57545	0.944	0.653	2.58607e-79	7.07355e-103	1.04263	0.977	0.805	1.80984e-98
RHOB	6.4128e-36	1.04243	2.23016e-40	1.22375	0.871	0.628	5.70608e-36	2.50637e-40	1.11369	0.863	0.616	6.4128e-36	1.37104e-83	1.04243	0.945	0.718	3.50794e-79
TRIB1	1.65349e-34	1.0372	2.25431e-51	1.1933	0.935	0.635	5.76788e-47	6.46247e-39	1.0372	0.869	0.618	1.65349e-34	1.1898e-64	1.04877	0.868	0.645	3.04422e-60
EFHC1	5.01152e-15	1.02754	1.9587e-19	1.10039	0.602	0.365	5.01152e-15	2.69958e-34	1.30274	0.659	0.366	6.90714e-30	4.22476e-30	1.02754	0.577	0.358	1.08095e-25
SKIL	2.86072e-10	1.01962	1.11808e-14	1.02572	0.566	0.372	2.86072e-10	1.35593e-16	1.01962	0.556	0.358	3.46928e-12	4.73981e-27	1.05209	0.52	0.325	1.21273e-22
JUN	4.28638e-62	1.00653	7.35229e-70	1.30441	0.989	0.722	1.88116e-65	1.67528e-66	1.21337	0.984	0.754	4.28638e-62	6.94515e-105	1.00653	0.984	0.862	1.77699e-100
CDHR2	9.24607e-31	0.993706	3.61372e-35	1.39727	0.763	0.462	9.24607e-31	9.34913e-36	1.37882	0.741	0.467	2.39207e-31	1.04364e-37	0.993706	0.709	0.497	2.67026e-33
AL645465.1	9.35651e-13	0.988544	5.33976e-31	1.45701	0.516	0.225	1.36623e-26	1.93795e-27	1.39017	0.478	0.223	4.95844e-23	3.65689e-17	0.988544	0.371	0.223	9.35651e-13
AC108058.1	5.10278e-11	0.987923	7.18211e-16	1.13905	0.434	0.23	1.83762e-11	1.99437e-15	1.10557	0.397	0.214	5.10278e-11	7.75688e-24	0.987923	0.426	0.243	1.98467e-19
TNFRSF21	1.06883e-20	0.982593	4.1774e-25	0.982593	0.921	0.822	1.06883e-20	1.50334e-35	1.10365	0.938	0.813	3.84645e-31	1.57757e-65	1.06503	0.943	0.851	4.03637e-61
PLEKHG6	9.51676e-16	0.976664	1.57194e-20	1.06522	0.674	0.448	4.02196e-16	3.71952e-20	0.976664	0.641	0.419	9.51676e-16	9.94777e-39	1.07054	0.641	0.399	2.54524e-34
MYO1E	4.08036e-43	0.974417	1.59476e-47	0.985459	0.989	0.983	4.08036e-43	7.35861e-77	1.11186	0.994	0.979	1.88278e-72	1.06222e-94	0.974417	0.995	0.983	2.7178e-90
EMP1	1.91669e-17	0.974383	7.15289e-39	1.44236	0.81	0.505	1.83014e-34	7.49117e-22	0.974383	0.709	0.499	1.91669e-17	4.33037e-49	1.15084	0.808	0.578	1.10797e-44
NFATC2	1.52913e-11	0.972697	5.97644e-16	1.09188	0.695	0.538	1.52913e-11	2.40375e-20	1.1448	0.706	0.518	6.15023e-16	4.53194e-21	0.972697	0.653	0.519	1.15954e-16
RASGRP3	1.02313e-06	0.951167	3.9988e-11	0.951167	0.28	0.132	1.02313e-06	2.39082e-18	1.27795	0.319	0.139	6.11716e-14	6.2017e-33	1.06861	0.477	0.251	1.58677e-28
DNAH7	1.79444e-23	0.94658	7.01339e-28	1.25809	0.573	0.283	1.79444e-23	1.03187e-37	1.33362	0.613	0.286	2.64014e-33	3.64961e-33	0.94658	0.532	0.298	9.33789e-29
MYADM	8.87213e-48	0.943853	3.46757e-52	1.18254	0.921	0.637	8.87213e-48	2.19523e-57	1.2435	0.897	0.598	5.61673e-53	5.18264e-59	0.943853	0.88	0.672	1.32603e-54
CSRNP1	2.77614e-10	0.912398	1.21865e-19	1.22118	0.427	0.201	3.11803e-15	1.08502e-14	1.13107	0.344	0.174	2.77614e-10	2.25205e-16	0.912398	0.328	0.187	5.7621e-12
AC107072.2	1.01033e-07	0.910825	3.94874e-12	0.971772	0.52	0.346	1.01033e-07	1.00455e-17	1.00331	0.534	0.315	2.57024e-13	4.77037e-15	0.910825	0.388	0.251	1.22055e-10
LMCD1	7.13017e-05	0.905096	6.94188e-14	0.905096	0.534	0.34	1.77615e-09	2.78675e-09	1.21557	0.45	0.318	7.13017e-05	1.42166e-13	0.927115	0.471	0.354	3.63746e-09
GP6	0.000795297	0.904063	3.10833e-08	0.904063	0.287	0.159	0.000795297	5.47997e-09	0.934712	0.253	0.134	0.000140211	2.99283e-13	0.949706	0.26	0.145	7.65746e-09
AC008649.2	1.10083e-08	0.902672	4.30246e-13	1.00975	0.401	0.216	1.10083e-08	8.07909e-15	0.999482	0.391	0.209	2.06712e-10	3.95063e-19	0.902672	0.374	0.213	1.01081e-14
ARHGAP42	3.73295e-41	0.885798	1.45898e-45	0.964755	0.996	0.956	3.73295e-41	1.8767e-67	1.11032	0.994	0.958	4.80173e-63	1.39352e-80	0.885798	0.998	0.972	3.56547e-76
BAIAP2L1	6.45754e-45	0.881266	3.23886e-55	1.00212	0.989	0.963	8.28696e-51	2.52386e-49	0.987356	0.997	0.96	6.45754e-45	1.40676e-72	0.881266	0.991	0.959	3.59935e-68
ZFP36	5.32208e-29	0.881247	1.97833e-35	0.988086	0.907	0.665	5.06175e-31	2.08007e-33	1.03229	0.806	0.569	5.32208e-29	5.35769e-36	0.881247	0.763	0.542	1.37082e-31
ARHGEF38	1.84223e-30	0.876907	7.20014e-35	0.876907	0.986	0.929	1.84223e-30	2.11993e-55	0.99844	0.981	0.92	5.42405e-51	2.11006e-66	0.892453	0.972	0.916	5.3988e-62
SPSB1	2.17693e-12	0.874202	5.2052e-19	1.00585	0.591	0.339	1.3318e-14	1.56789e-18	0.894318	0.578	0.349	4.01161e-14	8.50827e-17	0.874202	0.534	0.382	2.17693e-12
VCL	4.21398e-36	0.873387	1.64699e-40	0.873387	1	0.979	4.21398e-36	2.43332e-62	1.09822	0.997	0.986	6.22589e-58	2.1298e-99	0.912019	0.998	0.991	5.44931e-95
DUSP5	1.525e-13	0.870989	5.96029e-18	0.913605	0.649	0.419	1.525e-13	3.35241e-18	0.870989	0.628	0.393	8.57747e-14	5.68942e-45	1.18542	0.64	0.358	1.4557e-40
AL021707.1	2.00277e-05	0.858946	3.78046e-14	1.27068	0.333	0.162	9.6727e-10	1.79475e-12	1.12175	0.312	0.163	4.59205e-08	7.82759e-10	0.858946	0.274	0.175	2.00277e-05
CFAP69	1.18652e-16	0.850886	2.01408e-23	0.987929	0.781	0.588	5.15324e-19	4.6374e-21	0.927223	0.741	0.552	1.18652e-16	8.07342e-35	0.850886	0.773	0.572	2.06566e-30
FRMD4B	3.22291e-13	0.850298	1.25964e-17	0.900364	0.753	0.575	3.22291e-13	6.25905e-33	1.00362	0.791	0.515	1.60144e-28	8.49695e-40	0.850298	0.816	0.615	2.17403e-35
C3orf52	1.24148e-06	0.849092	4.91489e-12	0.859485	0.563	0.385	1.25752e-07	4.85217e-11	0.849092	0.537	0.389	1.24148e-06	1.97458e-29	1.03538	0.6	0.402	5.05216e-25
WDR47	8.17559e-09	0.843659	1.81109e-23	1.20955	0.52	0.259	4.63386e-19	3.19534e-13	0.928891	0.441	0.265	8.17559e-09	4.84969e-16	0.843659	0.376	0.229	1.24084e-11
RORA	1.04932e-07	0.843097	7.3486e-16	1.05302	0.606	0.413	1.88021e-11	4.10115e-12	0.843097	0.594	0.431	1.04932e-07	1.3586e-20	0.847641	0.666	0.517	3.47611e-16
GPRC5D-AS1	2.16605e-06	0.841148	1.64052e-19	1.21208	0.692	0.482	4.19742e-15	8.46576e-11	0.841148	0.634	0.495	2.16605e-06	1.52498e-21	1.06253	0.648	0.489	3.90182e-17
HNF4A-AS1	7.99112e-21	0.840909	7.51461e-26	1.03784	0.735	0.479	1.92269e-21	6.60691e-31	1.1497	0.694	0.417	1.69044e-26	3.12324e-25	0.840909	0.601	0.415	7.99112e-21
FHAD1	0.000895131	0.830672	6.93835e-19	1.41769	0.376	0.172	1.77525e-14	2.90127e-08	1.05421	0.278	0.163	0.00074232	3.49852e-08	0.830672	0.258	0.168	0.000895131
IER2	5.61054e-26	0.827809	2.19281e-30	0.836769	0.961	0.881	5.61054e-26	6.93627e-36	0.827809	0.972	0.875	1.77471e-31	1.04631e-66	0.83309	0.972	0.876	2.6771e-62
MLF1	2.14604e-10	0.827534	8.38754e-15	1.07685	0.523	0.324	2.14604e-10	1.01526e-16	1.09812	0.525	0.324	2.59765e-12	5.54368e-19	0.827534	0.575	0.402	1.4184e-14
PPIL6	5.5924e-09	0.820104	2.74812e-16	0.971192	0.609	0.404	7.03135e-12	2.18573e-13	0.820104	0.594	0.42	5.5924e-09	7.28799e-27	0.834142	0.574	0.366	1.86471e-22
SLC3A1	4.08297e-05	0.819461	1.59578e-09	0.819461	0.373	0.218	4.08297e-05	2.29216e-11	0.932075	0.319	0.171	5.86471e-07	2.53601e-18	1.05261	0.265	0.132	6.48863e-14
TENT5B	0.00930548	0.810167	6.30659e-12	0.975037	0.394	0.218	1.6136e-07	3.63694e-07	0.810167	0.338	0.221	0.00930548	6.0573e-12	0.824175	0.3	0.182	1.54982e-07
IDI2-AS1	0.00559035	0.809097	2.18493e-07	0.809097	0.323	0.197	0.00559035	3.99994e-15	1.14934	0.356	0.181	1.02342e-10	8.89194e-23	1.08316	0.341	0.176	2.27509e-18
AC007384.1	7.05278e-10	0.808812	1.88056e-23	1.23642	0.47	0.214	4.81161e-19	2.7565e-14	1.11568	0.366	0.196	7.05278e-10	2.48997e-15	0.808812	0.348	0.206	6.37083e-11
ERN1	4.00256e-14	0.799737	1.56436e-18	0.913728	0.817	0.659	4.00256e-14	5.38843e-28	1.01111	0.834	0.655	1.37868e-23	3.80093e-27	0.799737	0.818	0.711	9.72505e-23
GCH1	1.64544e-11	0.796419	5.92505e-19	1.09732	0.642	0.408	1.51598e-14	2.10498e-18	1.03405	0.625	0.432	5.3858e-14	6.43101e-16	0.796419	0.541	0.39	1.64544e-11
C5AR1	7.25357e-06	0.79096	2.21582e-24	1.46523	0.423	0.18	5.66939e-20	5.34979e-20	1.44758	0.372	0.177	1.3688e-15	2.83498e-10	0.79096	0.341	0.231	7.25357e-06
KIF9	6.43802e-09	0.788268	2.51623e-13	0.83595	0.663	0.476	6.43802e-09	3.7484e-15	0.788268	0.678	0.489	9.59065e-11	6.04209e-35	0.979426	0.697	0.487	1.54593e-30
TOGARAM1	3.55257e-06	0.785089	1.38848e-10	0.876668	0.477	0.308	3.55257e-06	3.93114e-15	0.959197	0.509	0.314	1.00582e-10	1.00466e-14	0.785089	0.451	0.309	2.57053e-10
DUSP16	5.35861e-16	0.78096	2.09435e-20	0.866945	0.828	0.694	5.35861e-16	1.75183e-40	1.06341	0.909	0.678	4.48222e-36	5.68057e-31	0.78096	0.846	0.706	1.45343e-26
LINC01004	1.51771e-26	0.772231	5.93178e-31	1.06757	0.832	0.627	1.51771e-26	5.02976e-34	1.1515	0.809	0.578	1.28691e-29	5.46456e-35	0.772231	0.82	0.636	1.39816e-30
RALGDS	3.50356e-25	0.765535	1.90126e-31	1.01147	0.828	0.578	4.86456e-27	1.36933e-29	1.0034	0.8	0.585	3.50356e-25	3.88327e-32	0.765535	0.768	0.576	9.93573e-28
TMEM67	8.23519e-10	0.763603	1.75153e-20	1.13707	0.638	0.407	4.48147e-16	3.21863e-14	0.943932	0.591	0.415	8.23519e-10	7.9962e-28	0.763603	0.671	0.45	2.04591e-23
MAFF	1.93113e-06	0.758501	2.17468e-15	0.767945	0.642	0.407	5.56414e-11	7.5476e-11	0.758501	0.503	0.342	1.93113e-06	1.9096e-25	0.910573	0.567	0.371	4.8859e-21
WEE1	6.21418e-26	0.756649	5.90293e-42	1.1652	0.803	0.416	1.51032e-37	2.42874e-30	1.02879	0.738	0.447	6.21418e-26	6.31315e-38	0.756649	0.769	0.527	1.61528e-33
PBX4	3.92011e-10	0.743967	1.43715e-29	1.11714	0.817	0.588	3.6771e-25	1.53213e-14	0.743967	0.772	0.625	3.92011e-10	2.47539e-24	0.750829	0.756	0.614	6.33354e-20
BDKRB2	0.0105483	0.739998	1.47503e-09	0.955098	0.423	0.266	3.77401e-05	4.12268e-07	0.940705	0.338	0.23	0.0105483	4.40816e-08	0.739998	0.303	0.207	0.00112787
SLC9A1	9.6324e-07	0.738737	5.91593e-21	1.15652	0.688	0.457	1.51365e-16	3.76472e-11	0.738737	0.6	0.435	9.6324e-07	9.65207e-19	0.814502	0.562	0.398	2.46958e-14
ADGRE5	2.17292e-21	0.737227	8.49263e-26	0.926043	0.889	0.755	2.17292e-21	1.37152e-29	0.927139	0.897	0.746	3.50917e-25	5.85817e-28	0.737227	0.839	0.732	1.49887e-23
RRP12	1.58716e-08	0.734049	4.20363e-25	0.983106	0.735	0.466	1.07554e-20	6.20322e-13	0.767366	0.669	0.49	1.58716e-08	2.05159e-23	0.734049	0.693	0.516	5.2492e-19
RFX1	5.04131e-06	0.732777	1.55304e-12	0.780939	0.563	0.361	3.97361e-08	1.97034e-10	0.732777	0.522	0.359	5.04131e-06	3.40381e-23	0.881512	0.537	0.35	8.70899e-19
SLC25A33	7.23617e-16	0.729682	9.76955e-25	0.980671	0.774	0.521	2.49964e-20	2.82818e-20	0.845015	0.769	0.591	7.23617e-16	1.90239e-25	0.729682	0.698	0.489	4.86745e-21
LIPH	3.37443e-09	0.728505	6.96027e-16	0.827384	0.828	0.715	1.78086e-11	1.31886e-13	0.728505	0.781	0.635	3.37443e-09	4.27227e-57	1.11109	0.865	0.714	1.0931e-52
HMGCS1	3.48537e-18	0.728179	1.36222e-22	0.731046	0.964	0.921	3.48537e-18	3.2622e-24	0.728179	0.969	0.92	8.34666e-20	3.46036e-36	0.815977	0.962	0.928	8.85367e-32
CRYBG2	0.00382671	0.726253	1.49563e-07	0.772372	0.394	0.258	0.00382671	1.05334e-08	0.80074	0.359	0.225	0.000269507	1.22571e-07	0.726253	0.3	0.21	0.00313611
LRRC23	0.000210369	0.710701	8.22204e-09	0.750394	0.627	0.476	0.000210369	1.94285e-11	0.710701	0.65	0.492	4.97097e-07	6.07094e-15	0.739551	0.612	0.482	1.55331e-10
MYH14	4.77512e-19	0.709125	1.8663e-23	0.709125	0.946	0.862	4.77512e-19	7.40751e-28	0.776566	0.938	0.836	1.89528e-23	2.56743e-39	0.713513	0.919	0.821	6.56903e-35
ADIPOR2	1.9366e-18	0.702692	4.49458e-33	0.883497	0.978	0.895	1.14998e-28	7.56899e-23	0.750134	0.912	0.87	1.9366e-18	2.73925e-39	0.702692	0.932	0.849	7.00865e-35
ERCC1	1.17972e-06	0.701647	4.61079e-11	0.701647	0.62	0.438	1.17972e-06	4.89226e-12	0.739513	0.616	0.452	1.25173e-07	1.46287e-30	0.837916	0.69	0.481	3.74291e-26
FAM53C	1.42318e-05	0.699863	7.19372e-14	0.924872	0.538	0.336	1.84058e-09	5.56235e-10	0.810742	0.456	0.303	1.42318e-05	2.99622e-11	0.699863	0.397	0.276	7.66613e-07
SIRT1	1.6077e-17	0.69548	7.70846e-31	1.13009	0.799	0.568	1.97229e-26	1.31634e-27	0.921804	0.809	0.59	3.36799e-23	6.2835e-22	0.69548	0.759	0.613	1.6077e-17
KLF4	7.27868e-19	0.690296	2.84479e-23	0.882825	0.76	0.478	7.27868e-19	8.3998e-24	0.839116	0.741	0.478	2.14917e-19	2.83753e-25	0.690296	0.631	0.413	7.2601e-21
MCL1	2.92089e-12	0.688636	9.09389e-28	0.803574	0.939	0.781	2.32676e-23	1.1416e-16	0.688636	0.859	0.776	2.92089e-12	5.82619e-46	0.751506	0.906	0.757	1.49069e-41
KALRN	5.96881e-15	0.688583	2.33284e-19	0.858071	0.871	0.727	5.96881e-15	1.02416e-24	0.935204	0.866	0.673	2.62042e-20	2.32503e-20	0.688583	0.823	0.717	5.94882e-16
KCNG3	0.012381	0.683392	1.19314e-08	0.775228	0.341	0.197	0.000305276	6.81934e-09	1.02174	0.344	0.212	0.00017448	4.83899e-07	0.683392	0.319	0.233	0.012381
HNF1B	2.57155e-11	0.682377	1.35241e-16	0.767039	0.674	0.439	3.46027e-12	1.94186e-25	1.07304	0.678	0.426	4.96845e-21	1.00506e-15	0.682377	0.492	0.33	2.57155e-11
ERRFI1	8.33509e-23	0.682211	5.40296e-28	0.856771	0.957	0.845	1.3824e-23	3.25768e-27	0.821353	0.95	0.831	8.33509e-23	2.00756e-34	0.682211	0.969	0.891	5.13655e-30
SPATA13	1.14742e-38	0.681773	4.48457e-43	0.901375	0.986	0.9	1.14742e-38	7.67522e-56	1.03267	0.981	0.9	1.96378e-51	6.76952e-50	0.681773	0.986	0.925	1.73205e-45
PCSK5	1.41002e-32	0.681323	3.89142e-53	1.21307	0.986	0.895	9.95658e-49	6.06547e-53	1.26991	0.959	0.864	1.55191e-48	5.51089e-37	0.681323	0.965	0.919	1.41002e-32
SERPINB5	1.38224e-12	0.68103	3.16397e-28	1.00741	0.86	0.642	8.09533e-24	5.40232e-17	0.68103	0.825	0.654	1.38224e-12	2.52857e-44	0.897953	0.828	0.625	6.46959e-40
MAK	1.39253e-06	0.673366	5.44255e-11	0.812015	0.656	0.511	1.39253e-06	1.04006e-19	0.926663	0.694	0.496	2.6611e-15	2.68077e-13	0.673366	0.636	0.524	6.85903e-09
EVA1C	7.76139e-11	0.672172	3.03345e-15	0.981859	0.602	0.404	7.76139e-11	5.28542e-23	1.00228	0.709	0.459	1.35233e-18	1.29457e-20	0.672172	0.745	0.588	3.31228e-16
TLE4	2.47325e-08	0.662248	9.66642e-13	1.06713	0.427	0.25	2.47325e-08	2.92766e-19	0.858964	0.484	0.253	7.49071e-15	2.14228e-14	0.662248	0.477	0.322	5.48123e-10
TMC5	3.87595e-38	0.659118	1.51487e-42	0.724745	0.996	0.994	3.87595e-38	1.45313e-50	0.830252	0.997	0.987	3.71798e-46	9.2946e-60	0.659118	0.991	0.975	2.37812e-55
TBC1D25	0.03765	0.6528	1.47151e-06	0.688761	0.419	0.288	0.03765	1.27536e-06	0.6528	0.403	0.284	0.0326313	3.63545e-12	0.753485	0.369	0.244	9.30165e-08
SRF	0.000475035	0.651539	1.85662e-08	0.651539	0.52	0.351	0.000475035	1.95706e-09	0.758723	0.484	0.336	5.00733e-05	2.80701e-18	0.738253	0.477	0.305	7.182e-14
AC048341.1	0.000574345	0.645266	2.24476e-08	0.645266	0.419	0.258	0.000574345	1.21509e-19	1.1111	0.453	0.235	3.10893e-15	1.08301e-19	0.929669	0.445	0.275	2.77098e-15
MEF2D	4.09124e-05	0.643216	1.68071e-10	0.674829	0.645	0.469	4.30025e-06	1.59901e-09	0.688338	0.575	0.431	4.09124e-05	2.21865e-13	0.643216	0.518	0.379	5.67664e-09
ATAT1	0.000265735	0.638868	1.0386e-08	0.725355	0.502	0.354	0.000265735	5.84226e-09	0.735837	0.456	0.322	0.00014948	2.76342e-11	0.638868	0.421	0.289	7.07049e-07
LMO7	1.07096e-28	0.633125	4.18574e-33	0.633125	1	0.997	1.07096e-28	9.08075e-47	0.778447	1	0.995	2.3234e-42	3.3816e-90	0.708459	1	0.998	8.65215e-86
DMPK	0.033141	0.625586	1.29528e-06	0.66222	0.38	0.253	0.033141	4.06996e-07	0.625586	0.369	0.243	0.0104134	3.7996e-10	0.674415	0.347	0.233	9.72166e-06
MAP3K14	8.41613e-05	0.625534	3.28935e-09	0.625534	0.677	0.547	8.41613e-05	7.7118e-15	0.815683	0.688	0.546	1.97314e-10	1.31181e-25	0.785714	0.692	0.526	3.35639e-21
BTG2	0.000235392	0.6201	9.20003e-09	0.796393	0.527	0.366	0.000235392	2.18675e-11	0.768724	0.516	0.342	5.59502e-07	6.83581e-15	0.6201	0.459	0.304	1.74901e-10
STK40	2.08404e-05	0.618836	3.12799e-12	0.689966	0.703	0.524	8.00327e-08	8.14524e-10	0.618836	0.653	0.521	2.08404e-05	6.08568e-21	0.67849	0.723	0.556	1.55708e-16
GDA	1.02445e-12	0.614637	4.00396e-17	0.614637	0.996	0.985	1.02445e-12	7.68166e-21	0.681295	0.991	0.981	1.96543e-16	2.87129e-35	0.769733	0.974	0.954	7.34648e-31
DDIT3	0.000114311	0.611625	4.46771e-09	0.680649	0.584	0.429	0.000114311	2.09143e-12	0.622749	0.616	0.428	5.35114e-08	1.23832e-16	0.611625	0.575	0.401	3.16837e-12
MAPRE2	1.30589e-08	0.611236	5.10392e-13	0.611236	0.828	0.701	1.30589e-08	4.24556e-13	0.661327	0.838	0.71	1.08627e-08	9.87813e-43	0.851328	0.863	0.735	2.52742e-38
NOSTRIN	4.66308e-07	0.60576	1.82251e-11	0.81977	0.624	0.452	4.66308e-07	9.91913e-14	1.07503	0.575	0.407	2.53791e-09	1.78094e-14	0.60576	0.594	0.449	4.55671e-10
KCNJ14	0.00383241	0.602224	5.31422e-18	1.18399	0.437	0.22	1.3597e-13	4.87676e-13	0.987763	0.366	0.199	1.24777e-08	1.49786e-07	0.602224	0.293	0.2	0.00383241
ABHD2	4.03375e-16	0.602061	1.57655e-20	0.615646	0.964	0.908	4.03375e-16	4.95143e-28	0.745102	0.969	0.883	1.26687e-23	9.49889e-29	0.602061	0.931	0.855	2.43039e-24
CCDC173	0.000113524	0.600939	2.59014e-14	1.0078	0.573	0.367	6.62712e-10	4.43696e-09	0.710095	0.491	0.348	0.000113524	1.43789e-10	0.600939	0.556	0.437	3.67898e-06
ITGB8	2.40899e-09	0.597791	9.41527e-14	0.635757	0.918	0.849	2.40899e-09	2.50316e-17	0.708524	0.916	0.836	6.40459e-13	1.35903e-30	0.597791	0.972	0.934	3.4772e-26
HNF4A	1.37728e-29	0.596824	3.07706e-43	0.866441	0.975	0.921	7.87298e-39	5.38296e-34	0.786834	0.969	0.899	1.37728e-29	4.976e-35	0.596824	0.965	0.915	1.27316e-30
SLC20A2	2.92595e-08	0.594145	1.14358e-12	0.672078	0.889	0.862	2.92595e-08	1.28255e-21	0.702599	0.95	0.879	3.28154e-17	4.54192e-26	0.594145	0.964	0.93	1.1621e-21
SLC25A51	0.00591364	0.590598	3.02938e-15	0.933878	0.685	0.505	7.75098e-11	2.31128e-07	0.622709	0.641	0.537	0.00591364	1.05143e-11	0.590598	0.586	0.46	2.6902e-07
MCU	4.48673e-32	0.590202	1.75359e-36	0.643807	1	0.99	4.48673e-32	1.14527e-39	0.647203	1	0.983	2.93029e-35	7.7501e-58	0.590202	0.998	0.987	1.98294e-53
HES1	1.47215e-06	0.587772	5.75372e-11	0.587772	0.817	0.729	1.47215e-06	8.57026e-27	0.915483	0.881	0.703	2.19279e-22	1.52992e-54	0.88286	0.887	0.721	3.91446e-50
FOSL1	1.29414e-07	0.587687	7.82495e-35	1.09342	0.882	0.633	2.00209e-30	5.05801e-12	0.587687	0.822	0.694	1.29414e-07	1.65992e-36	0.717375	0.899	0.751	4.24706e-32
LDLR	3.76401e-42	0.58575	1.47112e-46	0.59866	1	0.998	3.76401e-42	2.08163e-50	0.606498	1	0.996	5.32607e-46	3.68355e-84	0.58575	1	0.997	9.42473e-80
NPC1	1.72711e-06	0.585534	6.7502e-11	0.585534	0.86	0.755	1.72711e-06	2.56202e-12	0.587025	0.844	0.711	6.55518e-08	1.48021e-26	0.671735	0.868	0.754	3.78726e-22
CBR3-AS1	8.65344e-05	0.584785	3.3821e-09	0.584785	0.57	0.391	8.65344e-05	4.0029e-12	0.771097	0.556	0.381	1.02418e-07	2.08715e-18	0.862852	0.529	0.362	5.34017e-14
THUMPD3-AS1	0.00492815	0.584037	2.4931e-09	0.611343	0.746	0.649	6.37885e-05	1.92611e-07	0.584037	0.684	0.599	0.00492815	1.88508e-16	0.594394	0.752	0.622	4.82317e-12
TRAF3IP1	2.39838e-21	0.583744	1.96498e-28	0.900915	0.864	0.681	5.0276e-24	1.9409e-39	0.989636	0.887	0.697	4.96598e-35	9.3738e-26	0.583744	0.894	0.792	2.39838e-21
TCP11L2	0.00246876	0.582862	5.5696e-13	0.754413	0.774	0.597	1.42504e-08	9.64887e-08	0.582862	0.634	0.515	0.00246876	1.38547e-15	0.725621	0.582	0.439	3.54486e-11
IFRD1	2.28601e-08	0.579281	8.93462e-13	0.618732	0.781	0.624	2.28601e-08	5.17906e-20	0.723988	0.834	0.615	1.32511e-15	3.44857e-18	0.579281	0.728	0.574	8.82351e-14
ZSWIM6	3.75355e-26	0.577909	4.02361e-33	0.838482	0.968	0.909	1.02948e-28	6.44459e-37	0.860075	0.978	0.888	1.64891e-32	1.46703e-30	0.577909	0.96	0.905	3.75355e-26
MINDY4	9.12282e-06	0.574221	1.14685e-10	0.856293	0.609	0.46	2.93432e-06	2.62208e-11	0.663922	0.616	0.457	6.70886e-07	3.56555e-10	0.574221	0.558	0.446	9.12282e-06
TSC22D3	9.51598e-06	0.573601	5.09171e-11	0.670726	0.57	0.381	1.30277e-06	6.61895e-12	0.775082	0.519	0.343	1.69352e-07	3.71921e-10	0.573601	0.506	0.377	9.51598e-06
SH3D21	0.00179631	0.572486	3.49673e-11	0.613365	0.57	0.373	8.94675e-07	1.29273e-14	0.808893	0.506	0.305	3.30759e-10	7.02068e-08	0.572486	0.378	0.28	0.00179631
NECTIN2	1.52026e-05	0.570926	5.94178e-10	0.570926	0.803	0.701	1.52026e-05	1.73284e-11	0.658784	0.772	0.641	4.43364e-07	4.85767e-18	0.673651	0.773	0.672	1.24288e-13
PPP4R1	2.72632e-18	0.566942	4.35582e-24	0.652415	0.921	0.846	1.11448e-19	1.06555e-22	0.70159	0.922	0.821	2.72632e-18	4.26004e-27	0.566942	0.927	0.83	1.08997e-22
KDM6B	0.000429967	0.56576	2.06805e-10	0.585146	0.62	0.42	5.29131e-06	1.68048e-08	0.56576	0.55	0.4	0.000429967	1.34281e-17	0.743019	0.506	0.347	3.43572e-13
ATP2B1	1.6477e-25	0.565548	7.64478e-42	0.876994	0.996	0.965	1.95599e-37	2.12917e-40	0.934362	0.981	0.973	5.44769e-36	6.43985e-30	0.565548	0.972	0.944	1.6477e-25
UBAP1	1.97345e-08	0.564655	7.71299e-13	0.564655	0.864	0.755	1.97345e-08	4.57767e-20	0.687489	0.887	0.744	1.17124e-15	5.20282e-21	0.575462	0.846	0.742	1.33119e-16
MTMR12	2.5937e-16	0.564553	1.01372e-20	0.695	0.932	0.848	2.5937e-16	1.14002e-29	0.790435	0.938	0.859	2.91685e-25	5.22142e-21	0.564553	0.894	0.825	1.33595e-16
CDH1	3.45953e-16	0.563751	1.35212e-20	0.563751	0.982	0.96	3.45953e-16	1.03972e-33	0.773434	0.978	0.957	2.66023e-29	3.25514e-34	0.572495	0.988	0.963	8.3286e-30
AC011476.3	0.0274204	0.562553	5.60264e-09	0.69598	0.595	0.445	0.000143349	1.0717e-06	0.562553	0.547	0.433	0.0274204	2.85555e-19	0.761201	0.6	0.431	7.30621e-15
VPS37B	6.48007e-26	0.560344	7.39878e-35	0.649349	0.993	0.98	1.89305e-30	2.53266e-30	0.570435	0.991	0.98	6.48007e-26	1.43837e-52	0.560344	0.995	0.973	3.68021e-48
AFF1	7.24547e-23	0.551597	2.83181e-27	0.636392	0.993	0.958	7.24547e-23	5.92888e-48	0.857956	0.997	0.952	1.51696e-43	5.1351e-35	0.551597	0.972	0.966	1.31387e-30
LRRFIP1	1.09517e-43	0.551266	4.28035e-48	0.658751	1	0.998	1.09517e-43	1.62275e-51	0.665365	1	0.997	4.15197e-47	3.77132e-80	0.551266	1	0.999	9.6493e-76
PDLIM1	2.24379e-15	0.551221	8.76959e-20	0.566527	0.95	0.879	2.24379e-15	1.84177e-27	0.701973	0.975	0.853	4.71236e-23	1.51891e-32	0.551221	0.941	0.868	3.88628e-28
PPP1R15A	2.57176e-15	0.551143	1.1023e-36	0.798027	0.964	0.822	2.82034e-32	1.00515e-19	0.551143	0.934	0.839	2.57176e-15	1.08065e-36	0.573941	0.941	0.843	2.76495e-32
CASZ1	3.91024e-08	0.549179	6.27544e-16	0.879772	0.746	0.618	1.60563e-11	1.36403e-17	0.83714	0.772	0.617	3.49001e-13	1.52827e-12	0.549179	0.678	0.558	3.91024e-08
SLC7A1	2.75867e-14	0.548082	8.2701e-25	0.804582	0.932	0.837	2.11599e-20	1.0782e-18	0.574756	0.953	0.869	2.75867e-14	7.54952e-32	0.548082	0.96	0.906	1.93162e-27
LATS2	1.3092e-05	0.543913	3.51402e-12	0.633135	0.753	0.604	8.99098e-08	5.11687e-10	0.650791	0.706	0.585	1.3092e-05	2.09271e-16	0.543913	0.802	0.676	5.35441e-12
INTS6	3.14911e-11	0.540408	1.43234e-31	0.956129	0.928	0.851	3.6648e-27	3.76267e-32	0.935862	0.959	0.817	9.62716e-28	1.2308e-15	0.540408	0.891	0.834	3.14911e-11
AC007906.2	1.97383e-06	0.538129	1.20185e-18	0.956202	0.624	0.382	3.07506e-14	7.71451e-11	0.862131	0.537	0.389	1.97383e-06	9.43026e-12	0.538129	0.532	0.391	2.41283e-07
LPIN2	8.54926e-19	0.537587	1.86754e-26	0.842795	0.939	0.854	4.77829e-22	2.77621e-34	0.808126	0.953	0.833	7.10321e-30	3.34138e-23	0.537587	0.91	0.827	8.54926e-19
EZR	8.02288e-34	0.537228	4.16478e-47	0.711767	1	1	1.0656e-42	3.13565e-38	0.537228	1	0.999	8.02288e-34	3.92008e-72	0.551403	1	0.999	1.00299e-67
STK24	3.08617e-12	0.53421	3.21817e-21	0.593777	0.989	0.946	8.23401e-17	1.2062e-16	0.53421	0.959	0.946	3.08617e-12	2.49279e-43	0.665141	0.977	0.948	6.37804e-39
PDLIM5	2.69156e-13	0.532476	1.05197e-17	0.532476	0.986	0.966	2.69156e-13	1.73343e-35	0.810897	0.997	0.965	4.43516e-31	3.26038e-37	0.608515	0.986	0.96	8.34202e-33
RASEF	3.62744e-13	0.532463	1.0442e-23	0.760003	0.957	0.875	2.67169e-19	1.41774e-17	0.637958	0.95	0.884	3.62744e-13	1.01849e-19	0.532463	0.936	0.876	2.6059e-15
AREG	5.59958e-10	0.529688	1.44552e-14	0.806021	0.814	0.65	3.69851e-10	2.18853e-14	0.529688	0.803	0.613	5.59958e-10	9.5014e-52	1.03638	0.894	0.715	2.43103e-47
NEDD9	9.30544e-10	0.528444	3.20169e-15	0.660159	0.835	0.704	8.19185e-11	3.63693e-14	0.528444	0.831	0.661	9.30544e-10	4.31445e-15	0.586115	0.735	0.603	1.10389e-10
SMIM31	0.000324127	0.519649	1.48516e-09	0.519649	0.821	0.687	3.79993e-05	1.63579e-14	0.72315	0.762	0.6	4.18532e-10	1.26681e-08	0.554512	0.61	0.512	0.000324127
HECA	0.00840397	0.516116	3.2846e-07	0.516116	0.545	0.399	0.00840397	3.30516e-14	0.907577	0.553	0.36	8.45657e-10	1.51984e-11	0.670142	0.459	0.332	3.88865e-07
TGFBR3	5.98169e-07	0.515452	2.33788e-11	0.515452	0.903	0.817	5.98169e-07	3.9489e-27	0.839443	0.906	0.795	1.01037e-22	5.59245e-27	0.566123	0.91	0.822	1.43088e-22
MBNL2	3.63651e-22	0.515383	1.42129e-26	0.575351	0.996	0.993	3.63651e-22	1.63331e-38	0.631539	1	0.994	4.17898e-34	1.75397e-54	0.515383	0.998	0.998	4.48771e-50
SPRY4	0.0358474	0.515041	5.21867e-10	0.67413	0.588	0.421	1.33525e-05	1.40106e-06	0.55521	0.484	0.364	0.0358474	3.17526e-09	0.515041	0.482	0.361	8.12422e-05
MFSD6	1.78769e-09	0.514146	6.98698e-14	0.75899	0.857	0.758	1.78769e-09	3.5567e-18	0.803731	0.856	0.735	9.10017e-14	2.31474e-17	0.514146	0.865	0.794	5.92249e-13
ELL2	0.0125208	0.510156	1.2388e-16	0.792096	0.778	0.587	3.16959e-12	4.69537e-12	0.713687	0.713	0.558	1.20136e-07	4.89363e-07	0.510156	0.53	0.453	0.0125208
CORO1C	1.41065e-12	0.509284	5.51336e-17	0.537811	0.964	0.898	1.41065e-12	1.82795e-33	0.725678	0.975	0.902	4.677e-29	1.86513e-26	0.509284	0.95	0.898	4.77213e-22
SKI	0.000170634	0.50859	6.66905e-09	0.50859	0.645	0.472	0.000170634	1.4199e-09	0.592293	0.603	0.476	3.63296e-05	7.97738e-12	0.544661	0.594	0.465	2.04109e-07
FOSL2	0.00139048	0.507044	1.10664e-09	0.559418	0.735	0.572	2.83144e-05	5.43452e-08	0.507044	0.653	0.529	0.00139048	4.46607e-25	0.695978	0.702	0.526	1.14269e-20
ARIH1	1.76906e-18	0.500075	3.17363e-26	0.565228	0.996	0.967	8.12005e-22	6.91417e-23	0.54887	0.988	0.973	1.76906e-18	1.00071e-38	0.500075	0.986	0.977	2.56043e-34

## Sheet: Cluster_5
GENE	max.adj.pval	min.log2FC	IKK_ko_p_val	IKK_ko_avg_log2FC	IKK_ko_pct.1	IKK_ko_pct.2	IKK_ko_p_val_adj	IKK_ko_CLD_inh_p_val	IKK_ko_CLD_inh_avg_log2FC	IKK_ko_CLD_inh_pct.1	IKK_ko_CLD_inh_pct.2	IKK_ko_CLD_inh_p_val_adj	WT_p_val	WT_avg_log2FC	WT_pct.1	WT_pct.2	WT_p_val_adj
CDC20	8.9619e-217	3.42386	2.17861e-243	4.594	0.604	0.037	5.57419e-239	3.50266e-221	3.89497	0.623	0.059	8.9619e-217	3.03523e-223	3.42386	0.516	0.059	7.76594e-219
CCNB1	1.09449e-154	3.29011	4.27769e-159	3.90205	0.709	0.114	1.09449e-154	1.22285e-197	3.67938	0.783	0.134	3.12879e-193	2.12758e-230	3.29011	0.678	0.121	5.44364e-226
PTTG1	4.21501e-180	3.20447	1.64739e-184	4.00631	0.961	0.244	4.21501e-180	3.50573e-198	3.49493	0.953	0.263	8.96977e-194	6.77202e-258	3.20447	0.889	0.239	1.73269e-253
BIRC5	3.59575e-263	3.04543	1.65998e-285	3.79144	0.93	0.099	4.24721e-281	1.40536e-267	3.38841	0.953	0.144	3.59575e-263	0	3.04543	0.904	0.151	0
CEP55	2.94657e-214	2.86745	4.44579e-245	3.9128	0.757	0.068	1.1375e-240	3.70632e-232	3.39311	0.79	0.101	9.48298e-228	1.15164e-218	2.86745	0.647	0.104	2.94657e-214
CENPF	8.85934e-191	2.82734	2.80287e-195	3.54666	0.991	0.232	7.17141e-191	3.46257e-195	3.19677	0.996	0.308	8.85934e-191	5.36969e-278	2.82734	1	0.342	1.37389e-273
CCNB2	6.88354e-131	2.80777	2.69035e-135	3.3652	0.704	0.132	6.88354e-131	1.51698e-146	3.16151	0.703	0.139	3.88134e-142	5.67791e-160	2.80777	0.618	0.14	1.45275e-155
DLGAP5	2.08239e-202	2.64557	8.1388e-207	3.52575	0.687	0.066	2.08239e-202	5.71916e-240	3.13581	0.775	0.088	1.4633e-235	6.81498e-237	2.64557	0.642	0.09	1.74368e-232
HMMR	1.09804e-131	2.55646	4.29157e-136	3.34356	0.652	0.103	1.09804e-131	1.97231e-150	3.06755	0.703	0.129	5.04634e-146	6.98256e-165	2.55646	0.613	0.128	1.78656e-160
TPX2	5.48503e-124	2.53984	2.14376e-128	3.10981	0.857	0.241	5.48503e-124	2.71102e-150	2.89732	0.891	0.269	6.93641e-146	1.11699e-207	2.53984	0.849	0.242	2.85793e-203
PIMREG	6.13458e-74	2.53932	7.07846e-147	3.75013	0.461	0.039	1.81109e-142	8.3423e-118	3.16679	0.424	0.05	2.13446e-113	2.39763e-78	2.53932	0.28	0.049	6.13458e-74
PRR11	9.27127e-174	2.53162	7.47015e-179	3.12389	0.861	0.151	1.91131e-174	3.62357e-178	2.89474	0.851	0.178	9.27127e-174	3.01405e-230	2.53162	0.822	0.185	7.71174e-226
ASPM	4.99997e-179	2.45789	1.95418e-183	3.39511	0.752	0.101	4.99997e-179	7.01858e-185	2.96818	0.783	0.129	1.79577e-180	5.56497e-192	2.45789	0.704	0.151	1.42385e-187
NEK2	3.22716e-97	2.39096	2.63429e-130	3.21809	0.483	0.05	6.74008e-126	9.44369e-147	3.05987	0.543	0.069	2.41626e-142	1.2613e-101	2.39096	0.391	0.076	3.22716e-97
SPAG5	8.87803e-62	2.31397	3.46988e-66	2.95168	0.343	0.052	8.87803e-62	7.32299e-95	2.96786	0.424	0.065	1.87366e-90	1.86761e-69	2.31397	0.311	0.068	4.77847e-65
CDKN3	1.40534e-98	2.28567	5.49262e-103	2.86393	0.743	0.198	1.40534e-98	4.97546e-141	2.59028	0.844	0.219	1.27302e-136	1.44074e-132	2.28567	0.662	0.191	3.68628e-128
PSRC1	7.67465e-65	2.19767	6.65683e-70	2.9096	0.365	0.056	1.70322e-65	6.28674e-73	2.59422	0.388	0.07	1.60853e-68	2.99955e-69	2.19767	0.304	0.065	7.67465e-65
MKI67	7.12861e-167	2.17784	2.78614e-171	2.86088	0.913	0.187	7.12861e-167	1.36299e-177	2.50355	0.949	0.242	3.48734e-173	2.80112e-238	2.17784	0.953	0.271	7.16695e-234
CENPE	2.9284e-148	2.16181	1.14453e-152	3.24259	0.783	0.146	2.9284e-148	5.95689e-179	2.87321	0.837	0.169	1.52413e-174	2.33199e-180	2.16181	0.758	0.194	5.96662e-176
TROAP	4.07296e-107	2.11439	9.19761e-149	3.14595	0.604	0.073	2.3533e-144	1.59187e-111	2.53085	0.554	0.097	4.07296e-107	7.60869e-134	2.11439	0.531	0.107	1.94676e-129
NMU	4.52706e-103	2.04577	2.60589e-113	2.54141	0.861	0.271	6.66744e-109	1.76935e-107	2.21212	0.877	0.31	4.52706e-103	8.72522e-127	2.04577	0.724	0.235	2.23244e-122
GTSE1	3.90123e-138	2.02377	4.15679e-165	2.95371	0.578	0.055	1.06356e-160	6.20275e-177	2.61196	0.638	0.076	1.58704e-172	1.52475e-142	2.02377	0.491	0.082	3.90123e-138
BUB1	4.35819e-119	2.0103	1.70335e-123	2.83954	0.578	0.081	4.35819e-119	2.03749e-133	2.54343	0.641	0.111	5.21312e-129	3.23561e-140	2.0103	0.602	0.135	8.27862e-136
HMGB2	1.96032e-85	2.00028	7.66171e-90	2.91545	0.909	0.476	1.96032e-85	6.06376e-100	2.55121	0.917	0.522	1.55147e-95	1.58437e-106	2.00028	0.84	0.464	4.05377e-102
DEPDC1	1.53638e-78	1.99266	2.07736e-108	3.06081	0.483	0.064	5.31512e-104	2.91726e-103	2.59014	0.518	0.09	7.46411e-99	6.00475e-83	1.99266	0.424	0.105	1.53638e-78
UBE2S	2.94404e-89	1.98441	1.15065e-93	2.53002	0.948	0.629	2.94404e-89	9.75705e-111	2.25174	0.957	0.639	2.49644e-106	1.16762e-118	1.98441	0.898	0.615	2.98747e-114
KIF2C	8.6174e-105	1.9435	2.40033e-112	2.98806	0.474	0.058	6.14148e-108	9.35649e-133	2.33495	0.565	0.08	2.39395e-128	3.36801e-109	1.9435	0.449	0.09	8.6174e-105
CKS2	1.93015e-50	1.9373	7.54377e-55	2.1777	0.896	0.646	1.93015e-50	1.41838e-69	2.16285	0.891	0.634	3.62908e-65	3.27479e-82	1.9373	0.831	0.565	8.37888e-78
HMGB3	2.10554e-83	1.91514	8.22925e-88	2.1265	0.926	0.539	2.10554e-83	3.6304e-114	2.08908	0.957	0.595	9.28875e-110	7.38541e-128	1.91514	0.902	0.547	1.88963e-123
MAD2L1	6.01999e-74	1.9118	2.35284e-78	2.4271	0.743	0.258	6.01999e-74	4.28749e-97	2.29121	0.801	0.286	1.097e-92	1.21772e-107	1.9118	0.689	0.239	3.11566e-103
PBK	6.34573e-121	1.90865	5.48749e-184	3.02374	0.626	0.058	1.40403e-179	7.58904e-167	2.47312	0.681	0.093	1.94173e-162	2.48016e-125	1.90865	0.502	0.097	6.34573e-121
SAPCD2	4.93092e-48	1.8813	1.9272e-52	2.39159	0.543	0.176	4.93092e-48	6.588e-87	2.47838	0.638	0.177	1.68561e-82	1.01851e-67	1.8813	0.498	0.174	2.60596e-63
CENPW	1.27065e-88	1.8579	7.18689e-142	2.93717	0.687	0.105	1.83884e-137	2.15187e-155	2.62931	0.775	0.15	5.50578e-151	4.9662e-93	1.8579	0.54	0.151	1.27065e-88
KIF4A	6.56818e-147	1.85238	3.30294e-163	2.84457	0.643	0.074	8.4509e-159	2.01654e-180	2.44317	0.71	0.095	5.15952e-176	2.5671e-151	1.85238	0.582	0.111	6.56818e-147
PRC1	1.44131e-88	1.81758	5.63321e-93	2.50794	0.657	0.155	1.44131e-88	7.53118e-137	2.50039	0.79	0.187	1.92693e-132	3.33842e-105	1.81758	0.651	0.209	8.54169e-101
STMN1	1.21364e-121	1.78942	4.74337e-126	2.64538	0.983	0.486	1.21364e-121	6.56977e-136	2.38934	0.993	0.553	1.68094e-131	3.24837e-149	1.78942	0.958	0.564	8.31127e-145
CCNA2	1.48413e-60	1.7808	5.80055e-65	2.59009	0.396	0.07	1.48413e-60	1.07949e-82	2.23328	0.471	0.09	2.76197e-78	3.16233e-68	1.7808	0.362	0.09	8.09114e-64
AURKA	5.40605e-27	1.75931	2.11289e-31	2.2638	0.496	0.21	5.40605e-27	5.13833e-43	2.0065	0.547	0.224	1.31469e-38	3.23862e-52	1.75931	0.484	0.199	8.28632e-48
NUF2	2.43686e-87	1.73765	1.9112e-119	3.01216	0.665	0.125	4.88999e-115	9.32503e-109	2.48041	0.649	0.145	2.3859e-104	9.5242e-92	1.73765	0.553	0.161	2.43686e-87
SGO1	5.92244e-42	1.71436	1.95314e-59	2.33173	0.387	0.072	4.99731e-55	5.39244e-86	2.43186	0.489	0.094	1.37971e-81	2.31472e-46	1.71436	0.333	0.104	5.92244e-42
TUBA1B	3.01268e-87	1.6908	1.17747e-91	2.1626	0.991	0.798	3.01268e-87	1.05904e-104	2.11934	0.982	0.773	2.70967e-100	1.10999e-125	1.6908	0.96	0.714	2.84002e-121
FOXM1	5.00292e-84	1.62069	3.99756e-90	2.37982	0.704	0.178	1.02282e-85	1.95534e-88	1.9159	0.728	0.217	5.00292e-84	4.17141e-90	1.62069	0.604	0.194	1.0673e-85
ANP32E	1.61965e-69	1.61496	6.33021e-74	2.00993	0.878	0.468	1.61965e-69	1.68381e-97	1.88064	0.931	0.521	4.30819e-93	8.22322e-104	1.61496	0.838	0.439	2.10399e-99
DTYMK	1.97895e-85	1.60082	7.73449e-90	2.10565	0.904	0.439	1.97895e-85	3.10437e-105	1.86293	0.957	0.475	7.94284e-101	6.85881e-111	1.60082	0.896	0.531	1.7549e-106
PTMS	9.37414e-95	1.59887	3.66378e-99	1.62219	1	0.879	9.37414e-95	2.2208e-120	1.59887	1	0.866	5.68214e-116	9.57259e-187	1.60794	0.998	0.851	2.44924e-182
SPA17	1.53642e-25	1.58845	6.00494e-30	1.64378	0.504	0.205	1.53642e-25	2.23989e-52	1.85693	0.598	0.22	5.73099e-48	9.68046e-54	1.58845	0.502	0.2	2.47684e-49
HMGN2	1.37571e-96	1.58336	5.3768e-101	1.929	1	0.893	1.37571e-96	1.43526e-125	1.74032	0.996	0.927	3.67226e-121	8.35199e-178	1.58336	0.996	0.886	2.13694e-173
PLK1	1.87211e-27	1.56696	7.31692e-32	2.04745	0.304	0.078	1.87211e-27	1.29369e-43	1.93197	0.366	0.098	3.31003e-39	1.60229e-42	1.56696	0.289	0.085	4.09963e-38
KIF20B	9.95235e-39	1.55228	3.88976e-43	2.07129	0.739	0.427	9.95235e-39	6.62596e-57	2.04273	0.793	0.447	1.69532e-52	2.95039e-52	1.55228	0.693	0.428	7.54886e-48
NCAPD2	3.21819e-55	1.53893	1.25779e-59	1.81148	0.817	0.433	3.21819e-55	5.33899e-63	1.61813	0.815	0.42	1.36603e-58	5.74125e-101	1.53893	0.82	0.384	1.46896e-96
CENPA	7.96417e-36	1.5096	4.95718e-47	2.14456	0.587	0.218	1.26834e-42	3.1127e-40	1.80536	0.558	0.24	7.96417e-36	4.90322e-49	1.5096	0.558	0.264	1.25454e-44
TOP2A	4.14542e-173	1.49538	1.62019e-177	2.1885	0.887	0.156	4.14542e-173	2.71901e-184	1.72959	0.935	0.198	6.95685e-180	3.38981e-231	1.49538	0.9	0.217	8.67316e-227
SGO2	1.30794e-27	1.48192	5.11192e-32	2.15412	0.352	0.102	1.30794e-27	4.19465e-41	1.96482	0.402	0.121	1.07324e-36	5.48427e-55	1.48192	0.447	0.157	1.40321e-50
AL118516.1	1.00614e-25	1.47718	6.4218e-44	1.92166	0.504	0.157	1.64308e-39	6.16876e-35	1.73289	0.457	0.169	1.57834e-30	3.93238e-30	1.47718	0.32	0.128	1.00614e-25
RAD21	1.45261e-74	1.45242	5.67737e-79	1.68124	0.996	0.93	1.45261e-74	1.05875e-110	1.73079	0.993	0.925	2.70891e-106	2.26648e-127	1.45242	0.982	0.91	5.79901e-123
KIF14	1.84004e-89	1.43134	1.26842e-96	2.26288	0.517	0.083	3.24539e-92	6.69791e-106	2.06595	0.558	0.101	1.71373e-101	7.19159e-94	1.43134	0.473	0.114	1.84004e-89
CKAP2L	6.65249e-38	1.40766	2.60005e-42	1.96766	0.313	0.063	6.65249e-38	1.71183e-43	1.53243	0.377	0.098	4.3799e-39	3.21439e-65	1.40766	0.387	0.102	8.22434e-61
KNSTRN	2.00813e-24	1.39804	7.84855e-29	1.8423	0.435	0.167	2.00813e-24	2.36864e-38	1.82488	0.46	0.165	6.06041e-34	3.00092e-29	1.39804	0.338	0.141	7.67816e-25
CDCA8	1.00906e-22	1.39678	3.94379e-27	1.75014	0.409	0.152	1.00906e-22	4.51962e-71	1.76238	0.562	0.145	1.15639e-66	3.12496e-64	1.39678	0.453	0.141	7.99553e-60
ARHGAP11A	6.46805e-40	1.38974	6.9729e-52	2.1463	0.548	0.17	1.78409e-47	1.6389e-48	1.87449	0.522	0.18	4.19329e-44	2.52797e-44	1.38974	0.447	0.178	6.46805e-40
EMC9	7.50489e-19	1.38478	2.9332e-23	1.63575	0.426	0.18	7.50489e-19	1.02847e-26	1.41118	0.46	0.196	2.63146e-22	6.78255e-33	1.38478	0.38	0.16	1.73538e-28
ILF3-DT	2.45541e-24	1.36606	9.59669e-29	1.41077	0.639	0.33	2.45541e-24	3.69827e-41	1.59022	0.67	0.331	9.46238e-37	6.54219e-38	1.36606	0.516	0.252	1.67388e-33
H2AFZ	2.08346e-84	1.34721	8.14299e-89	1.64349	0.991	0.89	2.08346e-84	2.13159e-115	1.55716	1	0.917	5.45388e-111	4.7643e-135	1.34721	0.991	0.89	1.21899e-130
CKAP2	6.23623e-17	1.33183	2.43736e-21	1.62449	0.509	0.271	6.23623e-17	6.72079e-33	1.51116	0.587	0.286	1.71958e-28	2.92699e-30	1.33183	0.487	0.262	7.489e-26
CAVIN3	1.45085e-30	1.31185	5.67048e-35	1.4338	0.787	0.506	1.45085e-30	1.23755e-57	1.5534	0.848	0.544	3.1664e-53	9.30611e-60	1.31185	0.798	0.532	2.38106e-55
MZT1	1.37511e-36	1.3077	5.37445e-41	1.54171	0.8	0.525	1.37511e-36	7.05094e-60	1.52688	0.848	0.554	1.80405e-55	6.38428e-49	1.3077	0.731	0.479	1.63348e-44
HMGB1	2.34077e-113	1.30523	9.14865e-118	1.56307	1	0.997	2.34077e-113	8.75754e-137	1.41996	1	0.998	2.24071e-132	8.73027e-205	1.30523	1	0.998	2.23373e-200
H2AFV	3.17979e-91	1.27121	1.24279e-95	1.48225	1	0.889	3.17979e-91	1.39569e-110	1.36917	1	0.918	3.57101e-106	1.05889e-147	1.27121	0.998	0.902	2.70927e-143
GGH	7.35787e-45	1.26471	1.69341e-65	2.00879	0.665	0.206	4.33275e-61	2.87574e-49	1.52644	0.692	0.293	7.35787e-45	9.17434e-51	1.26471	0.607	0.274	2.34735e-46
YBX2	2.33755e-13	1.24832	2.01752e-24	1.80863	0.326	0.107	5.16202e-20	9.13605e-18	1.56114	0.275	0.106	2.33755e-13	2.43778e-18	1.24832	0.278	0.131	6.2373e-14
ZWINT	1.74866e-43	1.24565	9.20542e-51	1.86739	0.496	0.133	2.3553e-46	7.18942e-66	1.82455	0.576	0.161	1.83948e-61	6.83444e-48	1.24565	0.451	0.164	1.74866e-43
CALM3	7.58093e-45	1.23444	2.96292e-49	1.23444	0.935	0.706	7.58093e-45	3.64028e-62	1.27817	0.946	0.718	9.31401e-58	1.07318e-76	1.27444	0.889	0.626	2.74584e-72
LMNB2	2.70095e-30	1.22828	1.05563e-34	1.45053	0.713	0.387	2.70095e-30	5.70912e-37	1.23318	0.736	0.415	1.46074e-32	3.98144e-49	1.22828	0.711	0.418	1.01869e-44
AURKB	1.97878e-29	1.22063	2.61287e-71	2.09509	0.404	0.064	6.68529e-67	3.63031e-48	1.52794	0.373	0.086	9.28852e-44	7.73384e-34	1.22063	0.273	0.087	1.97878e-29
SMC2	1.48887e-53	1.20324	3.51958e-71	2.03558	0.791	0.305	9.00519e-67	2.48529e-81	1.80065	0.83	0.326	6.35887e-77	5.81909e-58	1.20324	0.684	0.322	1.48887e-53
NUDT1	1.43986e-31	1.20194	1.82853e-48	2.03321	0.6	0.214	4.67847e-44	1.41726e-53	1.6775	0.638	0.243	3.62619e-49	5.62751e-36	1.20194	0.504	0.24	1.43986e-31
REEP4	4.35158e-13	1.19842	1.70077e-17	1.40735	0.439	0.219	4.35158e-13	1.9263e-31	1.58922	0.496	0.211	4.92863e-27	5.93026e-19	1.19842	0.329	0.168	1.51732e-14
RACGAP1	3.26124e-17	1.19226	1.27462e-21	1.19226	0.617	0.368	3.26124e-17	8.25649e-49	1.52158	0.717	0.361	2.11251e-44	5.60347e-46	1.28123	0.609	0.322	1.4337e-41
NCAPH	7.40655e-57	1.18822	2.89477e-61	1.80583	0.391	0.068	7.40655e-57	1.14948e-61	1.60191	0.446	0.098	2.94106e-57	1.23851e-65	1.18822	0.447	0.127	3.16884e-61
POC1A	6.53417e-16	1.17554	2.55381e-20	1.69756	0.313	0.111	6.53417e-16	4.99858e-26	1.2867	0.362	0.127	1.27894e-21	2.32824e-26	1.17554	0.322	0.134	5.95705e-22
TACC3	7.51628e-30	1.17337	2.93765e-34	1.58072	0.474	0.164	7.51628e-30	9.32632e-54	1.55499	0.583	0.194	2.38623e-49	1.00342e-35	1.17337	0.449	0.199	2.56735e-31
MIS18A	3.39264e-21	1.16384	1.32597e-25	1.44206	0.504	0.218	3.39264e-21	8.03711e-37	1.49204	0.565	0.238	2.05638e-32	3.23819e-26	1.16384	0.449	0.233	8.28522e-22
KNL1	6.91594e-64	1.15877	6.30786e-85	1.96415	0.657	0.156	1.61393e-80	6.47338e-93	1.84684	0.688	0.183	1.65628e-88	2.70302e-68	1.15877	0.562	0.201	6.91594e-64
DCTN3	1.12524e-26	1.15517	4.39789e-31	1.15573	0.826	0.591	1.12524e-26	6.99691e-49	1.15517	0.902	0.617	1.79023e-44	7.40577e-57	1.2292	0.782	0.499	1.89484e-52
TNFAIP8L1	9.52546e-08	1.15236	3.72292e-12	1.23633	0.33	0.16	9.52546e-08	4.18321e-14	1.32677	0.322	0.156	1.07032e-09	8.4891e-19	1.15236	0.347	0.182	2.17202e-14
HOTAIRM1	2.03743e-17	1.14489	7.96307e-22	1.14489	0.635	0.36	2.03743e-17	3.12181e-41	1.43188	0.652	0.291	7.98747e-37	6.19275e-49	1.50129	0.54	0.246	1.58448e-44
DDX39A	6.28486e-28	1.12751	2.45637e-32	1.31347	0.757	0.45	6.28486e-28	4.4775e-41	1.20911	0.837	0.513	1.14561e-36	9.93782e-43	1.12751	0.722	0.446	2.54269e-38
APOLD1	4.0241e-10	1.12374	2.48968e-20	1.17601	0.37	0.145	6.3701e-16	1.57278e-14	1.24538	0.322	0.152	4.0241e-10	4.19556e-37	1.12374	0.433	0.184	1.07347e-32
SKA3	5.40145e-29	1.08395	3.4359e-67	2.04115	0.491	0.102	8.79109e-63	1.48089e-74	1.80273	0.54	0.124	3.78901e-70	2.1111e-33	1.08395	0.349	0.131	5.40145e-29
LGALS1	2.87618e-14	1.05169	1.12412e-18	1.05169	0.643	0.379	2.87618e-14	4.98684e-26	1.40967	0.678	0.408	1.27593e-21	2.77866e-90	1.78537	0.842	0.492	7.10948e-86
SUN2	1.54802e-12	1.03551	6.05027e-17	1.03551	0.609	0.368	1.54802e-12	1.35532e-32	1.35055	0.649	0.34	3.46772e-28	3.34481e-61	1.66454	0.58	0.249	8.55803e-57
DYNLL1	9.47276e-58	1.03179	3.70232e-62	1.05452	1	0.98	9.47276e-58	3.36016e-86	1.09216	1	0.986	8.59731e-82	7.66893e-84	1.03179	0.987	0.967	1.96217e-79
HMG20B	1.85491e-15	1.0118	7.24969e-20	1.0118	0.77	0.564	1.85491e-15	1.7129e-36	1.27539	0.797	0.549	4.38263e-32	7.22253e-40	1.17449	0.702	0.457	1.84796e-35
NUCKS1	1.22891e-80	1.00741	4.80305e-85	1.22203	1	0.988	1.22891e-80	8.7909e-112	1.22084	1	0.99	2.24924e-107	4.41217e-129	1.00741	0.998	0.986	1.1289e-124
SMC4	1.09719e-32	0.995757	4.28826e-37	1.27796	0.896	0.646	1.09719e-32	5.63005e-57	1.37088	0.909	0.638	1.4405e-52	8.67573e-56	0.995757	0.891	0.663	2.21977e-51
ARL6IP1	5.77478e-34	0.989676	2.25701e-38	0.989676	1	0.951	5.77478e-34	1.10234e-86	1.44131	0.993	0.933	2.82044e-82	3.423e-136	1.51427	0.984	0.887	8.75809e-132
KIFC1	6.72991e-27	0.970594	2.63031e-31	1.33711	0.309	0.076	6.72991e-27	1.48737e-54	1.41964	0.406	0.09	3.80558e-50	7.18758e-33	0.970594	0.304	0.104	1.83901e-28
RANGAP1	1.41498e-09	0.955291	5.53027e-14	0.99064	0.622	0.447	1.41498e-09	4.98643e-31	1.23716	0.725	0.444	1.27583e-26	1.74609e-23	0.955291	0.607	0.405	4.46755e-19
INCENP	1.73916e-05	0.948998	6.79733e-10	1.32069	0.291	0.147	1.73916e-05	4.0582e-16	1.1282	0.351	0.165	1.03833e-11	1.38842e-15	0.948998	0.284	0.144	3.5524e-11
METTL7A	3.27577e-15	0.94512	7.46956e-24	1.13472	0.717	0.439	1.91116e-19	1.2803e-19	0.94512	0.688	0.456	3.27577e-15	6.83421e-27	1.07688	0.58	0.361	1.7486e-22
CENPN	2.49694e-12	0.932162	5.56266e-52	1.8683	0.565	0.17	1.42326e-47	2.9606e-37	1.32521	0.533	0.199	7.57498e-33	9.75899e-17	0.932162	0.342	0.18	2.49694e-12
TTK	8.57155e-25	0.930207	2.17952e-47	2.09267	0.339	0.068	5.57651e-43	8.91553e-55	1.67625	0.406	0.094	2.28113e-50	3.35009e-29	0.930207	0.291	0.105	8.57155e-25
NRF1	1.79563e-23	0.916978	7.01801e-28	1.03781	0.917	0.692	1.79563e-23	1.24314e-33	1.0877	0.877	0.686	3.1807e-29	5.47569e-45	0.916978	0.88	0.685	1.40101e-40
CENPS	0.000105437	0.914543	4.1209e-09	0.920118	0.4	0.237	0.000105437	1.97954e-13	0.914543	0.457	0.264	5.06484e-09	8.88819e-18	0.926762	0.402	0.226	2.27413e-13
AC008443.1	3.1541e-07	0.910865	7.93484e-16	1.32699	0.478	0.267	2.03021e-11	9.07229e-16	1.19769	0.431	0.229	2.32123e-11	1.23274e-11	0.910865	0.378	0.243	3.1541e-07
TTC32	1.78674e-05	0.90316	3.08749e-16	1.31002	0.4	0.19	7.89964e-12	1.24147e-11	1.08165	0.315	0.16	3.17641e-07	6.98328e-10	0.90316	0.264	0.155	1.78674e-05
CCDC34	3.83061e-09	0.901892	1.49715e-13	0.960597	0.57	0.361	3.83061e-09	1.01539e-19	1.02359	0.616	0.394	2.59797e-15	7.38163e-22	0.901892	0.5	0.288	1.88866e-17
MDC1	1.78848e-05	0.896388	1.32499e-17	1.21944	0.47	0.232	3.39011e-13	6.99006e-10	0.905396	0.406	0.25	1.78848e-05	4.83014e-15	0.896388	0.407	0.247	1.23584e-10
FOXC1	8.63486e-06	0.896035	8.48412e-11	0.960806	0.443	0.261	2.17075e-06	3.37484e-10	0.920669	0.413	0.254	8.63486e-06	1.53902e-12	0.896035	0.389	0.253	3.93773e-08
CADM1	6.23925e-11	0.887176	2.57468e-16	1.21445	0.448	0.22	6.58759e-12	2.43854e-15	1.00668	0.428	0.224	6.23925e-11	2.0571e-17	0.887176	0.462	0.284	5.26329e-13
CDCA2	5.64175e-29	0.876745	2.20501e-33	1.50919	0.357	0.098	5.64175e-29	8.521e-36	1.1244	0.395	0.121	2.18018e-31	1.10014e-33	0.876745	0.344	0.127	2.81483e-29
IQGAP3	1.14031e-52	0.870229	1.0977e-78	1.91868	0.43	0.065	2.80857e-74	6.88638e-88	1.61992	0.511	0.094	1.76195e-83	4.45677e-57	0.870229	0.36	0.094	1.14031e-52
LSM5	1.87266e-36	0.870071	7.31907e-41	0.977598	0.987	0.868	1.87266e-36	4.47667e-51	0.892157	0.982	0.878	1.1454e-46	4.82604e-61	0.870071	0.953	0.821	1.23479e-56
ANLN	6.74609e-44	0.857835	1.54291e-71	1.71727	0.765	0.271	3.9477e-67	3.90871e-60	1.47868	0.717	0.292	1.00008e-55	2.63663e-48	0.857835	0.656	0.332	6.74609e-44
KIF11	1.15717e-09	0.856709	4.52268e-14	0.964362	0.343	0.156	1.15717e-09	5.23766e-23	0.953682	0.409	0.169	1.34011e-18	2.28231e-30	0.856709	0.384	0.162	5.83952e-26
VAMP2	5.27032e-09	0.834845	1.95e-15	0.928421	0.683	0.477	4.98927e-11	2.05985e-13	0.834845	0.616	0.433	5.27032e-09	1.23194e-25	1.00384	0.613	0.407	3.15203e-21
ILF2	9.9594e-31	0.823497	3.89252e-35	1.02811	0.948	0.75	9.9594e-31	2.2032e-40	0.93127	0.935	0.786	5.6371e-36	2.39429e-42	0.823497	0.887	0.743	6.12602e-38
HNRNPA2B1	6.40161e-98	0.820579	2.502e-102	0.994604	1	0.999	6.40161e-98	2.6081e-103	0.862112	1	1	6.6731e-99	7.63955e-145	0.820579	1	1	1.95466e-140
NUDT15	2.53363e-16	0.819499	2.98117e-31	1.15169	0.813	0.535	7.62762e-27	9.90243e-21	0.907327	0.761	0.545	2.53363e-16	1.6279e-21	0.819499	0.653	0.477	4.16514e-17
PHF19	1.51552e-10	0.807187	1.93237e-19	1.19126	0.552	0.3	4.94415e-15	6.97829e-17	0.999412	0.511	0.291	1.78546e-12	5.92323e-15	0.807187	0.424	0.26	1.51552e-10
AC008124.1	0.00518503	0.786553	2.02651e-07	0.808912	0.435	0.292	0.00518503	2.42846e-08	0.866944	0.388	0.249	0.000621345	6.12979e-11	0.786553	0.36	0.227	1.56837e-06
OSBPL6	7.70743e-05	0.77149	1.95845e-20	1.54514	0.413	0.177	5.01088e-16	2.06865e-13	1.20004	0.42	0.239	5.29284e-09	3.01236e-09	0.77149	0.411	0.296	7.70743e-05
GPSM2	2.22183e-11	0.770726	8.68378e-16	0.979677	0.696	0.516	2.22183e-11	1.43401e-29	1.17121	0.732	0.493	3.66906e-25	2.613e-25	0.770726	0.7	0.508	6.68563e-21
LMNB1	9.75938e-26	0.769933	3.25168e-33	1.38501	0.648	0.31	8.31974e-29	4.36788e-41	1.29496	0.692	0.343	1.11757e-36	3.81434e-30	0.769933	0.611	0.342	9.75938e-26
MRPL51	8.24676e-34	0.76803	3.22315e-38	0.883881	0.987	0.884	8.24676e-34	2.53034e-43	0.76803	0.986	0.912	6.47413e-39	2.63944e-58	0.82624	0.96	0.86	6.75327e-54
CRNDE	1.00814e-26	0.763599	3.94021e-31	0.935514	0.952	0.706	1.00814e-26	7.60996e-42	0.940105	0.949	0.761	1.94709e-37	9.50712e-40	0.763599	0.891	0.775	2.43249e-35
CDK2AP2	7.39511e-21	0.761045	2.89029e-25	0.761045	0.961	0.814	7.39511e-21	2.45412e-39	0.82331	0.964	0.828	6.27912e-35	3.3954e-56	0.926775	0.918	0.761	8.68748e-52
LSM3	1.60151e-31	0.758415	6.25931e-36	0.949322	0.974	0.767	1.60151e-31	2.11059e-41	0.824767	0.967	0.793	5.40016e-37	1.41356e-39	0.758415	0.9	0.711	3.61674e-35
SESN3	4.05203e-06	0.753008	1.58369e-10	0.766633	0.617	0.43	4.05203e-06	4.68903e-12	0.753008	0.609	0.422	1.19974e-07	6.41156e-17	0.804427	0.54	0.362	1.64046e-12
CENPH	8.20489e-14	0.751405	3.73318e-43	1.72218	0.574	0.198	9.5517e-39	1.58197e-44	1.51793	0.601	0.237	4.04762e-40	3.20679e-18	0.751405	0.462	0.266	8.20489e-14
SMTN	0.0114487	0.751405	4.47461e-07	0.972437	0.283	0.158	0.0114487	4.22055e-13	1.10578	0.33	0.162	1.07987e-08	4.0193e-09	0.751405	0.256	0.15	0.000102838
HSPH1	6.05362e-18	0.745095	2.36599e-22	0.745095	0.97	0.886	6.05362e-18	1.16135e-35	0.782521	0.971	0.9	2.97143e-31	8.54782e-56	0.825423	0.973	0.865	2.18704e-51
ARV1	6.9871e-06	0.739066	2.73083e-10	0.840085	0.509	0.33	6.9871e-06	3.40641e-12	0.824221	0.54	0.35	8.71564e-08	8.45173e-12	0.739066	0.451	0.308	2.16246e-07
COX8A	2.22395e-44	0.734708	8.69207e-49	0.827121	1	0.938	2.22395e-44	2.93103e-49	0.756837	1	0.949	7.49934e-45	7.81242e-58	0.734708	0.973	0.911	1.99889e-53
HDGF	1.87692e-37	0.728396	7.33575e-42	0.840004	0.991	0.945	1.87692e-37	1.89896e-52	0.824443	0.989	0.948	4.85868e-48	1.49018e-63	0.728396	0.989	0.949	3.81278e-59
ODF2	0.00188473	0.725566	7.36626e-08	0.725566	0.552	0.393	0.00188473	1.24268e-17	0.933537	0.62	0.387	3.17952e-13	1.91911e-19	0.885578	0.558	0.375	4.91023e-15
LBR	8.22642e-31	0.719185	3.21521e-35	0.887912	0.97	0.948	8.22642e-31	3.37028e-45	0.907945	0.982	0.951	8.62319e-41	2.73408e-45	0.719185	0.971	0.942	6.99543e-41
VPS13B-DT	0.0199054	0.71871	7.49276e-09	0.778644	0.483	0.31	0.00019171	7.7798e-07	0.740616	0.391	0.263	0.0199054	1.8869e-07	0.71871	0.356	0.253	0.00482781
AC025159.1	0.000672381	0.71751	2.62793e-08	0.904221	0.526	0.377	0.000672381	1.0875e-17	1.19224	0.562	0.344	2.78248e-13	4.91348e-13	0.71751	0.529	0.372	1.25716e-08
LRRCC1	2.57576e-05	0.716272	1.90448e-16	1.29279	0.443	0.219	4.87281e-12	8.36625e-17	0.931236	0.496	0.27	2.14059e-12	1.00671e-09	0.716272	0.373	0.248	2.57576e-05
GLRX5	4.22906e-25	0.714791	1.65288e-29	0.845177	0.983	0.854	4.22906e-25	1.31287e-32	0.714791	0.96	0.872	3.35911e-28	1.81232e-46	0.77488	0.936	0.802	4.637e-42
CIT	6.45735e-71	0.711927	2.52378e-75	1.40065	0.809	0.288	6.45735e-71	1.66359e-77	1.10373	0.797	0.287	4.25645e-73	3.62673e-82	0.711927	0.698	0.255	9.27936e-78
ZWILCH	0.00631032	0.703548	2.64794e-10	1.04856	0.33	0.167	6.77502e-06	9.10088e-12	1.22041	0.341	0.184	2.32855e-07	2.46632e-07	0.703548	0.256	0.161	0.00631032
NUDCD2	9.0017e-15	0.702009	1.26582e-30	0.960711	0.913	0.694	3.23874e-26	3.51821e-19	0.702009	0.866	0.708	9.0017e-15	4.2025e-29	0.730887	0.818	0.667	1.07525e-24
KIF15	1.09239e-31	0.686321	2.73149e-49	1.67328	0.383	0.08	6.9888e-45	4.00193e-47	1.46816	0.402	0.102	1.02393e-42	4.26949e-36	0.686321	0.36	0.126	1.09239e-31
FOPNL	4.02413e-09	0.685371	3.05813e-17	0.897294	0.77	0.594	7.82454e-13	7.48341e-17	0.841175	0.736	0.575	1.9147e-12	1.57279e-13	0.685371	0.651	0.521	4.02413e-09
IFT122	0.00135114	0.682311	8.60588e-09	0.926141	0.378	0.221	0.00022019	8.06049e-09	0.851288	0.377	0.234	0.000206236	5.28076e-08	0.682311	0.324	0.215	0.00135114
LSM4	7.02269e-37	0.681954	7.94301e-43	0.978164	0.987	0.883	2.0323e-38	2.74474e-41	0.781209	0.986	0.897	7.02269e-37	1.08156e-43	0.681954	0.967	0.872	2.76727e-39
PLP2	2.79842e-18	0.677577	1.09373e-22	0.677577	0.943	0.764	2.79842e-18	5.22864e-24	0.762684	0.902	0.732	1.3378e-19	3.17543e-35	0.729388	0.893	0.733	8.12466e-31
NCAPG	5.81192e-20	0.669715	1.18493e-29	1.4787	0.3	0.077	3.03176e-25	2.91268e-39	1.27875	0.38	0.105	7.45238e-35	2.27152e-24	0.669715	0.282	0.108	5.81192e-20
PTMA	1.72711e-76	0.663439	5.16068e-83	0.779499	1	0.998	1.32041e-78	6.75021e-81	0.663439	1	1	1.72711e-76	9.77669e-136	0.700085	1	1	2.50146e-131
SFPQ	4.82068e-30	0.662915	1.88411e-34	0.727451	0.996	0.979	4.82068e-30	3.68983e-54	0.760411	1	0.986	9.4408e-50	1.99708e-61	0.662915	0.998	0.985	5.10972e-57
MZT2B	1.84237e-32	0.659838	5.55306e-45	0.923831	0.996	0.896	1.42081e-40	7.2007e-37	0.707224	0.993	0.92	1.84237e-32	2.17442e-67	0.659838	0.996	0.955	5.56347e-63
HNRNPA3	7.88079e-48	0.657812	2.07873e-60	0.875389	1	0.989	5.31863e-56	3.08012e-52	0.681044	0.996	0.992	7.88079e-48	5.29892e-88	0.657812	1	0.998	1.35578e-83
ANAPC11	2.67543e-27	0.656559	1.04566e-31	0.805842	0.987	0.869	2.67543e-27	4.40238e-34	0.69405	0.978	0.879	1.12639e-29	1.30479e-32	0.656559	0.929	0.824	3.33843e-28
OAZ1	6.21348e-33	0.656051	2.42847e-37	0.714423	0.996	0.963	6.21348e-33	1.48337e-46	0.691969	0.989	0.972	3.79536e-42	6.1004e-63	0.656051	1	0.97	1.56085e-58
UBALD2	2.41328e-15	0.655853	2.28409e-26	0.974997	0.926	0.778	5.84408e-22	4.09583e-21	0.864466	0.826	0.708	1.04796e-16	9.43202e-20	0.655853	0.78	0.666	2.41328e-15
BCL2L12	0.00030258	0.653967	3.86489e-13	1.19187	0.422	0.23	9.88871e-09	3.01377e-20	1.27641	0.449	0.221	7.71102e-16	1.1826e-08	0.653967	0.369	0.248	0.00030258
PPIH	1.18558e-09	0.653943	5.03405e-24	1.10524	0.752	0.514	1.28801e-19	2.6018e-21	0.887659	0.746	0.517	6.65696e-17	4.6337e-14	0.653943	0.607	0.449	1.18558e-09
ANP32B	1.43156e-68	0.65174	1.50881e-75	0.952795	1	0.988	3.86044e-71	5.59508e-73	0.805363	1	0.989	1.43156e-68	2.37493e-86	0.65174	1	0.992	6.07649e-82
HNRNPH3	7.10491e-32	0.646075	6.80955e-42	0.820948	0.996	0.933	1.74229e-37	2.77688e-36	0.646075	0.975	0.942	7.10491e-32	8.71013e-49	0.653034	0.98	0.933	2.22857e-44
CNIH4	2.01769e-14	0.645551	3.56528e-23	0.829212	0.904	0.736	9.12212e-19	1.6704e-32	0.847583	0.928	0.729	4.27388e-28	7.88592e-19	0.645551	0.791	0.667	2.01769e-14
H3F3B	1.00088e-40	0.644636	3.91181e-45	0.690169	1	0.995	1.00088e-40	7.97773e-74	0.813241	1	0.998	2.04118e-69	3.58541e-78	0.644636	1	0.997	9.17364e-74
CIP2A	1.00304e-10	0.640766	3.71566e-23	1.6846	0.309	0.1	9.50689e-19	6.44594e-29	1.24251	0.377	0.126	1.64926e-24	3.92028e-15	0.640766	0.287	0.139	1.00304e-10
HMGN1	1.28627e-45	0.640545	8.90712e-57	0.824136	1	0.988	2.27898e-52	5.02723e-50	0.640545	1	0.991	1.28627e-45	1.90567e-71	0.6545	0.998	0.983	4.87584e-67
ANAPC15	0.00936886	0.639684	1.57935e-14	1.23558	0.5	0.3	4.04092e-10	1.11736e-09	0.81278	0.471	0.316	2.85888e-05	3.66171e-07	0.639684	0.333	0.231	0.00936886
IDI1	5.87433e-15	0.634062	2.29591e-19	0.634062	0.961	0.913	5.87433e-15	1.03087e-32	0.781783	0.964	0.901	2.63759e-28	1.96312e-21	0.724059	0.88	0.856	5.02284e-17
MDH1	2.68579e-15	0.630548	9.05774e-31	0.871156	0.961	0.802	2.31751e-26	1.04971e-19	0.655822	0.931	0.834	2.68579e-15	1.38755e-28	0.630548	0.884	0.795	3.55018e-24
RBBP6	5.28437e-10	0.62529	2.06534e-14	0.630625	0.948	0.851	5.28437e-10	8.92457e-21	0.651788	0.902	0.834	2.28344e-16	1.12371e-26	0.62529	0.893	0.827	2.87513e-22
HNRNPM	4.8194e-42	0.624515	3.04029e-58	0.865423	1	0.973	7.77889e-54	1.88361e-46	0.624515	1	0.986	4.8194e-42	5.12875e-67	0.648981	0.996	0.984	1.31224e-62
H2AFX	5.7019e-11	0.618735	2.22852e-15	0.843079	0.639	0.411	5.7019e-11	4.46042e-22	0.899771	0.67	0.43	1.14124e-17	1.72194e-15	0.618735	0.56	0.384	4.40576e-11
COX17	4.87995e-09	0.618717	1.90727e-13	0.618717	0.878	0.75	4.87995e-09	8.01507e-24	0.694244	0.906	0.758	2.05073e-19	1.78865e-22	0.654394	0.807	0.676	4.57645e-18
CDKN2AIPNL	0.0191025	0.617244	7.466e-07	0.617244	0.596	0.466	0.0191025	1.42195e-10	0.71451	0.62	0.462	3.6382e-06	1.76862e-13	0.673522	0.569	0.424	4.5252e-09
VBP1	1.0557e-18	0.611161	5.24891e-24	0.782338	0.922	0.787	1.34299e-19	9.88502e-27	0.763386	0.92	0.817	2.52918e-22	4.12608e-23	0.611161	0.862	0.751	1.0557e-18
HAGH	7.42878e-05	0.609752	2.90345e-09	0.651949	0.657	0.511	7.42878e-05	1.45373e-14	0.705632	0.699	0.506	3.71951e-10	1.33834e-11	0.609752	0.596	0.465	3.42428e-07
TMPO	2.705e-36	0.609587	8.15214e-49	0.94784	1	0.925	2.08581e-44	2.66164e-60	0.957522	1	0.918	6.81008e-56	1.05722e-40	0.609587	0.971	0.925	2.705e-36
RBM42	5.89463e-05	0.606973	4.02746e-11	0.773559	0.67	0.489	1.03046e-06	2.30385e-09	0.606973	0.645	0.489	5.89463e-05	4.66721e-13	0.669534	0.567	0.421	1.19415e-08
HOXA9	2.4706e-08	0.606426	9.65605e-13	0.606426	0.857	0.718	2.4706e-08	7.78112e-15	0.687215	0.841	0.712	1.99088e-10	1.82272e-29	0.716707	0.847	0.706	4.66362e-25
BAG5	4.03877e-06	0.603884	1.57851e-10	0.603884	0.817	0.677	4.03877e-06	3.29482e-20	0.74333	0.88	0.687	8.43013e-16	1.24502e-19	0.688229	0.744	0.583	3.1855e-15
PHGDH	3.52041e-29	0.600421	1.01623e-33	1.13099	0.917	0.605	2.60013e-29	4.43605e-35	0.828262	0.971	0.803	1.13501e-30	1.37591e-33	0.600421	0.953	0.838	3.52041e-29
HNRNPR	1.51432e-28	0.598826	5.91855e-33	0.647702	1	0.974	1.51432e-28	2.71141e-40	0.606661	1	0.981	6.93742e-36	3.19149e-67	0.598826	0.998	0.984	8.16576e-63
DHX29	7.62506e-10	0.597518	8.17507e-16	0.627008	0.9	0.758	2.09167e-11	2.98017e-14	0.597518	0.891	0.769	7.62506e-10	4.32954e-27	0.706716	0.844	0.726	1.10776e-22
FGD5-AS1	1.74622e-10	0.59399	6.94394e-17	0.617359	0.93	0.735	1.77668e-12	6.82489e-15	0.59399	0.866	0.749	1.74622e-10	3.03493e-21	0.633667	0.822	0.674	7.76517e-17
POLR2A	3.27293e-10	0.589154	1.27919e-14	0.589154	0.909	0.77	3.27293e-10	9.33802e-21	0.830569	0.899	0.771	2.38923e-16	4.85926e-20	0.649455	0.88	0.787	1.24329e-15
SNHG7	4.51456e-16	0.586857	1.76447e-20	0.644864	0.983	0.911	4.51456e-16	1.60901e-24	0.586857	0.971	0.876	4.1168e-20	5.0849e-39	0.628782	0.962	0.866	1.30102e-34
KIF22	0.000884082	0.586309	8.58815e-11	1.11357	0.391	0.218	2.19736e-06	2.18713e-12	0.983249	0.406	0.231	5.59599e-08	3.45534e-08	0.586309	0.324	0.212	0.000884082
HSP90B1	8.66706e-38	0.584953	3.38742e-42	0.584953	1	0.998	8.66706e-38	4.71976e-68	0.67619	1	0.999	1.2076e-63	3.96086e-111	0.686048	1	1	1.01342e-106
PSMB6	5.83815e-15	0.582085	1.7016e-20	0.751692	0.926	0.752	4.35372e-16	2.29595e-23	0.706518	0.899	0.78	5.87441e-19	2.28177e-19	0.582085	0.833	0.736	5.83815e-15
RAN	1.1588e-40	0.574173	4.52905e-45	0.753223	1	0.989	1.1588e-40	5.72788e-62	0.700683	1	0.996	1.46554e-57	2.93308e-58	0.574173	1	0.994	7.50458e-54
EBP	2.22936e-10	0.572137	8.71319e-15	0.579746	0.9	0.804	2.22936e-10	9.91513e-17	0.572137	0.913	0.796	2.53689e-12	1.1196e-20	0.584091	0.86	0.746	2.86461e-16
HSP90AA1	1.158e-40	0.571594	4.5259e-45	0.612421	1	1	1.158e-40	2.83222e-62	0.61343	1	1	7.24651e-58	6.02946e-66	0.571594	1	0.999	1.5427e-61
NUSAP1	8.30149e-22	0.571478	1.60631e-32	1.1964	0.548	0.224	4.1099e-28	6.61494e-53	1.26989	0.638	0.234	1.6925e-48	3.24454e-26	0.571478	0.487	0.254	8.30149e-22
NUCB2	6.03424e-10	0.565776	2.35841e-14	0.707434	0.813	0.628	6.03424e-10	4.69909e-19	0.683302	0.866	0.696	1.20231e-14	6.89341e-16	0.565776	0.816	0.713	1.76375e-11
ARID4A	0.00209761	0.56532	8.19829e-08	0.56532	0.87	0.762	0.00209761	5.67286e-11	0.598041	0.822	0.728	1.45146e-06	3.45913e-16	0.627634	0.82	0.714	8.85053e-12
ATP5IF1	1.58961e-17	0.564332	6.2128e-22	0.588881	0.987	0.94	1.58961e-17	6.00496e-27	0.564332	0.986	0.938	1.53643e-22	7.38169e-31	0.594271	0.958	0.877	1.88868e-26
C16orf91	0.0297363	0.563186	1.16221e-06	0.661606	0.483	0.344	0.0297363	3.86087e-07	0.563186	0.514	0.371	0.00987842	2.38815e-10	0.717689	0.411	0.28	6.11031e-06
PSMD2	9.70222e-10	0.560729	3.792e-14	0.590196	0.896	0.73	9.70222e-10	1.01071e-14	0.560729	0.906	0.771	2.586e-10	7.47235e-25	0.651301	0.842	0.709	1.91188e-20
GTF2A2	9.79762e-19	0.560345	3.82929e-23	0.666611	0.952	0.842	9.79762e-19	2.95078e-34	0.769318	0.957	0.855	7.54986e-30	6.73488e-25	0.560345	0.887	0.81	1.72319e-20
TPRKB	0.00183797	0.559057	7.18349e-08	0.745475	0.63	0.516	0.00183797	5.08068e-08	0.566208	0.678	0.54	0.00129994	5.85236e-09	0.559057	0.6	0.497	0.000149738
CBX1	3.31278e-07	0.558973	1.29476e-11	0.669368	0.787	0.645	3.31278e-07	1.03748e-15	0.681625	0.826	0.652	2.6545e-11	3.8447e-15	0.558973	0.74	0.597	9.83704e-11
AAMDC	0.0406488	0.558685	1.58871e-06	0.558685	0.591	0.441	0.0406488	2.28568e-10	0.797624	0.565	0.401	5.84813e-06	1.84935e-08	0.697203	0.456	0.332	0.000473175
HMGA1	1.35204e-16	0.55686	5.2843e-21	0.619407	1	0.981	1.35204e-16	2.70705e-40	0.759317	1	0.989	6.92626e-36	4.39022e-34	0.55686	1	0.993	1.12328e-29
TXNDC12	4.70924e-11	0.55533	1.84055e-15	0.55533	0.939	0.852	4.70924e-11	3.87515e-29	0.722839	0.942	0.846	9.91495e-25	7.90309e-31	0.590355	0.913	0.834	2.02208e-26
PSMD9	2.24661e-14	0.554575	8.78061e-19	0.582987	0.974	0.864	2.24661e-14	7.9288e-24	0.590679	0.957	0.885	2.02866e-19	7.95021e-30	0.554575	0.927	0.84	2.03414e-25
DNAJA1	3.539e-18	0.552319	1.38318e-22	0.592143	0.987	0.943	3.539e-18	2.03837e-37	0.715124	0.993	0.949	5.21536e-33	1.43088e-30	0.552319	0.951	0.924	3.66105e-26
STIP1	1.02565e-15	0.549284	4.00862e-20	0.715371	0.961	0.844	1.02565e-15	2.57573e-27	0.665942	0.949	0.873	6.59025e-23	5.2232e-25	0.549284	0.918	0.845	1.33641e-20
CCT5	3.25827e-31	0.546811	1.04269e-38	0.715417	1	0.976	2.66782e-34	1.27346e-35	0.56103	0.996	0.987	3.25827e-31	8.09843e-46	0.546811	0.996	0.983	2.07206e-41
PRRC2A	0.0199143	0.542012	7.78329e-07	0.542012	0.687	0.568	0.0199143	9.52494e-13	0.631156	0.75	0.58	2.43705e-08	4.07292e-13	0.565342	0.7	0.564	1.0421e-08
RDX	0.000581196	0.5391	2.27154e-08	0.645335	0.6	0.427	0.000581196	1.15784e-09	0.594125	0.659	0.478	2.96246e-05	3.78614e-17	0.5391	0.816	0.679	9.68721e-13
CACYBP	5.0421e-06	0.5373	1.97065e-10	0.5373	0.883	0.775	5.0421e-06	1.21651e-19	0.62344	0.92	0.788	3.11257e-15	5.6234e-24	0.614291	0.871	0.741	1.4388e-19
SRP9	1.23197e-27	0.529648	1.2701e-35	0.602019	0.991	0.982	3.24969e-31	4.815e-32	0.529648	0.996	0.981	1.23197e-27	1.30992e-46	0.562769	1	0.968	3.35157e-42
OGA	1.36845e-12	0.529066	5.34842e-17	0.529066	0.987	0.922	1.36845e-12	4.25543e-21	0.618203	0.971	0.919	1.08879e-16	9.30033e-24	0.542782	0.949	0.921	2.37958e-19
CSNK2A2	5.59021e-06	0.528284	2.18487e-10	0.554662	0.857	0.714	5.59021e-06	4.48373e-14	0.591469	0.844	0.712	1.14721e-09	4.33423e-16	0.528284	0.818	0.706	1.10896e-11
BUB1B	2.45853e-14	0.527792	1.58488e-51	1.60341	0.496	0.13	4.05509e-47	7.90164e-35	1.09392	0.482	0.174	2.02171e-30	9.6089e-19	0.527792	0.36	0.176	2.45853e-14
C17orf49	0.0357207	0.52769	1.3961e-06	0.555339	0.6	0.478	0.0357207	2.55265e-11	0.656347	0.681	0.516	6.5312e-07	5.1812e-07	0.52769	0.54	0.446	0.0132566
RDH11	2.52379e-09	0.527448	7.40606e-20	0.644457	0.948	0.836	1.89491e-15	9.86394e-14	0.527448	0.917	0.828	2.52379e-09	1.04485e-27	0.648657	0.871	0.753	2.67334e-23
DAZAP1	3.40065e-06	0.526579	9.82739e-13	0.580996	0.817	0.641	2.51443e-08	1.3291e-10	0.526579	0.797	0.655	3.40065e-06	9.18969e-14	0.527776	0.749	0.635	2.35127e-09
HNRNPUL2	3.77308e-10	0.524095	4.92191e-19	0.618531	0.978	0.867	1.25932e-14	1.47467e-14	0.524095	0.92	0.878	3.77308e-10	7.91886e-24	0.596563	0.907	0.832	2.02612e-19
SAFB2	1.60757e-05	0.523062	1.91148e-10	0.564661	0.848	0.72	4.89072e-06	1.58915e-11	0.562948	0.851	0.723	4.066e-07	6.28302e-10	0.523062	0.747	0.679	1.60757e-05
EXOSC8	3.60248e-08	0.52097	1.37835e-15	0.760003	0.73	0.524	3.52665e-11	1.84456e-17	0.716145	0.804	0.591	4.71948e-13	1.40799e-12	0.52097	0.693	0.553	3.60248e-08
FUBP1	4.96369e-16	0.517021	5.30109e-22	0.657245	0.965	0.893	1.35634e-17	1.94e-20	0.57728	0.971	0.893	4.96369e-16	4.79753e-26	0.517021	0.962	0.906	1.2275e-21
SORT1	1.18966e-05	0.516638	4.64965e-10	0.526135	0.843	0.686	1.18966e-05	2.72615e-11	0.561026	0.851	0.709	6.97514e-07	2.21404e-15	0.516638	0.791	0.664	5.66484e-11
ARID4B	1.55047e-10	0.514944	6.05982e-15	0.514944	0.991	0.975	1.55047e-10	4.28062e-19	0.601717	0.989	0.969	1.09524e-14	1.53103e-31	0.590559	0.987	0.967	3.9173e-27
DEK	1.11748e-33	0.514561	4.36753e-38	0.658318	1	0.984	1.11748e-33	1.94321e-47	0.646943	0.996	0.975	4.9719e-43	3.07556e-44	0.514561	1	0.98	7.86914e-40
CEBPZOS	1.74384e-07	0.514163	6.81562e-12	0.514163	0.926	0.835	1.74384e-07	5.33286e-21	0.585728	0.935	0.839	1.36447e-16	8.7747e-23	0.527613	0.902	0.825	2.24509e-18
FAM120AOS	0.000322575	0.513645	8.03408e-14	0.754004	0.757	0.575	2.0556e-09	3.04133e-21	0.914771	0.772	0.553	7.78154e-17	1.26075e-08	0.513645	0.671	0.575	0.000322575
PSMB8	0.0153316	0.513125	5.9922e-07	0.563417	0.713	0.613	0.0153316	2.57982e-13	0.623149	0.775	0.598	6.60073e-09	1.29216e-08	0.513125	0.604	0.495	0.000330612
DLG2	0.000161625	0.512886	6.31693e-09	0.668391	0.435	0.257	0.000161625	2.15083e-10	0.512886	0.391	0.215	5.50312e-06	1.74998e-17	0.704251	0.364	0.192	4.4775e-13
SEPTIN7	7.64102e-17	0.512202	2.98641e-21	0.527081	0.991	0.972	7.64102e-17	3.42699e-28	0.531436	1	0.976	8.76831e-24	3.7654e-39	0.512202	0.987	0.972	9.63416e-35
PSMC6	1.25796e-07	0.508203	4.91658e-12	0.529712	0.913	0.816	1.25796e-07	1.26793e-12	0.508203	0.884	0.808	3.24413e-08	1.02496e-16	0.511551	0.867	0.77	2.62247e-12
TUBA1C	9.09964e-07	0.504557	3.55649e-11	0.504557	0.939	0.924	9.09964e-07	8.62681e-26	0.561286	0.971	0.922	2.20725e-21	5.29711e-27	0.596832	0.918	0.863	1.35532e-22
TCP1	7.03652e-17	0.502545	9.39486e-26	0.702718	0.97	0.893	2.40377e-21	2.23136e-24	0.617027	0.953	0.887	5.70916e-20	2.75014e-21	0.502545	0.904	0.834	7.03652e-17
ZCRB1	2.34087e-12	0.502222	1.00417e-27	0.673994	0.983	0.874	2.56927e-23	9.14904e-17	0.502522	0.967	0.903	2.34087e-12	3.27823e-18	0.502222	0.896	0.847	8.38768e-14
HYOU1	0.0155836	0.501569	6.09068e-07	0.501569	0.713	0.589	0.0155836	6.49288e-08	0.50746	0.764	0.656	0.00166127	2.25037e-24	0.707787	0.782	0.633	5.7578e-20

## Sheet: Cluster_6
GENE	max.adj.pval	min.log2FC	IKK_ko_p_val	IKK_ko_avg_log2FC	IKK_ko_pct.1	IKK_ko_pct.2	IKK_ko_p_val_adj	IKK_ko_CLD_inh_p_val	IKK_ko_CLD_inh_avg_log2FC	IKK_ko_CLD_inh_pct.1	IKK_ko_CLD_inh_pct.2	IKK_ko_CLD_inh_p_val_adj	WT_p_val	WT_avg_log2FC	WT_pct.1	WT_pct.2	WT_p_val_adj
DTL	0	4.57729	0	5.23898	0.896	0.046	0	0	4.9273	0.895	0.06	0	0	4.57729	0.876	0.078	0
CDC45	6.95374e-231	4.19098	2.71779e-235	4.38051	0.636	0.034	6.95374e-231	7.3425e-248	4.40717	0.626	0.043	1.87865e-243	0	4.19098	0.582	0.05	0
MCM10	4.82847e-278	4.12886	1.88715e-282	4.83211	0.699	0.033	4.82847e-278	0	4.63472	0.752	0.044	0	0	4.12886	0.661	0.05	0
E2F1	1.50322e-259	4.03579	5.87518e-264	4.53168	0.792	0.054	1.50322e-259	0	4.47322	0.765	0.054	0	0	4.03579	0.729	0.069	0
FAM111B	5.23287e-248	4.03032	2.04521e-252	4.6901	0.671	0.036	5.23287e-248	3.14341e-303	4.43995	0.706	0.043	8.04273e-299	0	4.03032	0.617	0.052	0
UHRF1	5.7785e-209	3.93786	2.25846e-213	4.41082	0.861	0.096	5.7785e-209	1.08928e-248	4.11606	0.878	0.118	2.78704e-244	0	3.93786	0.867	0.134	0
WDR76	1.70512e-279	3.90031	6.66426e-284	4.59991	0.815	0.052	1.70512e-279	0	4.49135	0.853	0.065	0	0	3.90031	0.846	0.101	0
TP73	2.43494e-117	3.79152	9.5167e-122	3.928	0.416	0.031	2.43494e-117	1.56545e-180	4.19135	0.479	0.034	4.00537e-176	5.46688e-211	3.79152	0.435	0.04	1.39876e-206
ZNF367	4.45873e-226	3.75454	5.61824e-245	4.37379	0.838	0.071	1.43748e-240	1.74264e-230	4.11846	0.773	0.09	4.45873e-226	0	3.75454	0.839	0.106	0
ORC1	6.20728e-187	3.74676	2.42604e-191	4.46946	0.555	0.033	6.20728e-187	1.6769e-250	4.30782	0.613	0.04	4.29051e-246	5.70711e-253	3.74676	0.526	0.051	1.46022e-248
CCNE2	3.12765e-104	3.59942	1.22241e-108	3.63187	0.526	0.063	3.12765e-104	3.24775e-165	3.80308	0.525	0.049	8.30969e-161	6.31369e-160	3.59942	0.383	0.043	1.61542e-155
RAD51	5.09344e-110	3.5787	1.99072e-114	3.61427	0.532	0.06	5.09344e-110	2.65981e-159	3.60385	0.576	0.065	6.80538e-155	4.43229e-230	3.5787	0.53	0.059	1.13405e-225
DMC1	1.5393e-91	3.57686	6.0162e-96	3.79174	0.347	0.027	1.5393e-91	3.69348e-144	3.96099	0.408	0.031	9.45014e-140	1.02961e-175	3.57686	0.388	0.039	2.63435e-171
CLSPN	5.61579e-221	3.56684	2.19487e-225	3.9513	0.792	0.066	5.61579e-221	1.42031e-247	3.76628	0.815	0.088	3.634e-243	0	3.56684	0.776	0.1	0
GINS2	5.18532e-221	3.56222	2.02662e-225	4.09494	0.821	0.074	5.18532e-221	1.00535e-251	4.0238	0.803	0.085	2.57229e-247	0	3.56222	0.752	0.099	0
EXO1	1.19988e-124	3.54927	4.68961e-129	4.02007	0.462	0.037	1.19988e-124	1.15032e-184	3.97057	0.546	0.047	2.94321e-180	2.35542e-191	3.54927	0.446	0.049	6.02657e-187
XRCC2	8.30184e-205	3.45034	3.24468e-209	4.05793	0.832	0.087	8.30184e-205	1.09045e-244	3.76073	0.866	0.11	2.79003e-240	0	3.45034	0.829	0.132	0
CDC6	6.09781e-174	3.38952	2.38326e-178	3.81886	0.832	0.109	6.09781e-174	2.96336e-218	3.61481	0.861	0.127	7.58205e-214	0	3.38952	0.794	0.117	0
MCM5	5.27012e-207	3.36823	2.05977e-211	4.13286	0.85	0.094	5.27012e-207	9.05363e-267	3.98629	0.849	0.093	2.31646e-262	1.2949e-297	3.36823	0.776	0.118	3.31314e-293
MYBL2	6.69036e-95	3.35987	2.61485e-99	3.63085	0.462	0.051	6.69036e-95	8.217e-127	3.35987	0.529	0.07	2.1024e-122	1.79988e-218	3.6146	0.493	0.053	4.60516e-214
PCLAF	1.88191e-129	3.25422	7.35523e-134	3.3749	0.855	0.165	1.88191e-129	2.10008e-180	3.25422	0.916	0.193	5.37328e-176	1.09727e-284	3.27071	0.857	0.171	2.80748e-280
FANCA	2.57185e-172	3.24334	1.00518e-176	3.62989	0.965	0.173	2.57185e-172	6.33287e-195	3.38666	0.941	0.2	1.62033e-190	0	3.24334	0.97	0.221	0
CDT1	2.26942e-204	3.21551	8.86976e-209	3.72839	0.786	0.071	2.26942e-204	9.15332e-240	3.7344	0.765	0.078	2.34197e-235	7.64326e-253	3.21551	0.685	0.101	1.95561e-248
DSCC1	2.07214e-114	3.17292	8.09874e-119	3.47776	0.509	0.051	2.07214e-114	3.93909e-149	3.17292	0.58	0.069	1.00785e-144	1.2724e-185	3.21566	0.495	0.066	3.25556e-181
BLM	1.41307e-165	3.1636	5.52284e-170	3.81512	0.682	0.066	1.41307e-165	1.15996e-200	3.51085	0.723	0.083	2.96787e-196	1.25388e-246	3.1636	0.645	0.087	3.20818e-242
WDHD1	3.34789e-173	3.15029	1.30849e-177	3.74926	0.902	0.138	3.34789e-173	6.72961e-224	3.37831	0.962	0.166	1.72184e-219	0	3.15029	0.939	0.189	0
MIR924HG	2.1047e-148	3.13903	8.22599e-153	3.74904	0.971	0.223	2.1047e-148	1.67383e-188	3.58112	0.975	0.247	4.28267e-184	2.4278e-275	3.13903	0.984	0.296	6.21176e-271
BRIP1	9.63404e-123	3.1274	3.76536e-127	3.376	0.936	0.239	9.63404e-123	2.60923e-183	3.36968	0.966	0.239	6.67598e-179	1.6123e-264	3.1274	0.925	0.244	4.12524e-260
TCF19	4.63338e-104	3.1236	1.8109e-108	3.56409	0.457	0.044	4.63338e-104	2.26189e-113	3.1361	0.462	0.057	5.78727e-109	6.54996e-138	3.1236	0.362	0.045	1.67587e-133
CHAF1A	1.19528e-128	3.09506	4.6716e-133	3.13192	0.913	0.205	1.19528e-128	2.56844e-176	3.22836	0.916	0.212	6.5716e-172	1.06242e-278	3.09506	0.886	0.195	2.71831e-274
MCM2	4.8284e-187	3.06946	1.88713e-191	3.77413	0.821	0.094	4.8284e-187	4.81998e-218	3.50985	0.807	0.101	1.23324e-213	5.73848e-230	3.06946	0.687	0.115	1.46825e-225
E2F7	6.21698e-126	3.03688	2.42983e-130	3.26746	0.578	0.06	6.21698e-126	2.43163e-166	3.35053	0.639	0.077	6.22158e-162	3.56141e-216	3.03688	0.586	0.08	9.11223e-212
CENPU	9.38734e-152	3.00188	3.66894e-156	3.35922	0.809	0.114	9.38734e-152	1.79943e-173	3.21274	0.84	0.156	4.60403e-169	1.61939e-250	3.00188	0.797	0.157	4.14337e-246
KNTC1	2.9619e-141	2.9951	1.15762e-145	3.31309	0.913	0.18	2.9619e-141	5.65821e-181	3.11606	0.92	0.197	1.44771e-176	0	2.9951	0.965	0.216	0
BRCA2	7.90463e-141	2.96404	3.08944e-145	3.30274	0.827	0.13	7.90463e-141	3.10413e-186	3.21371	0.87	0.152	7.94222e-182	5.50375e-251	2.96404	0.834	0.175	1.40819e-246
PSMC3IP	4.90201e-60	2.94813	1.9159e-64	3.07292	0.376	0.052	4.90201e-60	5.65612e-101	3.06579	0.454	0.063	1.44718e-96	5.53884e-124	2.94813	0.369	0.053	1.41717e-119
ZGRF1	2.14379e-90	2.94761	8.37877e-95	3.23535	0.618	0.104	2.14379e-90	2.38904e-140	3.21655	0.676	0.113	6.11261e-136	1.60099e-166	2.94761	0.579	0.11	4.09629e-162
RMI2	2.17048e-104	2.94734	8.48308e-109	3.13226	0.624	0.09	2.17048e-104	5.96315e-138	3.15829	0.601	0.084	1.52573e-133	5.39351e-167	2.94734	0.488	0.071	1.37998e-162
GINS1	6.27954e-154	2.93577	2.45429e-158	3.35756	0.861	0.132	6.27954e-154	1.242e-179	2.9829	0.895	0.166	3.17777e-175	3.81456e-288	2.93577	0.914	0.189	9.75993e-284
CENPP	3.30237e-98	2.88727	1.29069e-102	3.00089	0.867	0.235	3.30237e-98	1.75452e-144	3.01412	0.933	0.284	4.48912e-140	5.01849e-225	2.88727	0.881	0.237	1.28403e-220
RAD54L	5.31711e-85	2.86693	2.07813e-89	3.2308	0.491	0.066	5.31711e-85	3.52767e-133	2.99666	0.576	0.078	9.02589e-129	1.03398e-172	2.86693	0.526	0.082	2.64554e-168
GINS4	1.60678e-108	2.85694	6.27992e-113	3.48796	0.474	0.046	1.60678e-108	4.37088e-132	3.26427	0.508	0.059	1.11833e-127	2.68533e-156	2.85694	0.46	0.066	6.87068e-152
ORC6	2.79099e-145	2.85558	1.09083e-149	3.39752	0.815	0.124	2.79099e-145	1.13297e-180	3.06182	0.84	0.143	2.89882e-176	9.782e-264	2.85558	0.818	0.149	2.50282e-259
DDIAS	4.27617e-89	2.84818	1.67129e-93	3.31163	0.422	0.044	4.27617e-89	7.41111e-99	3.09484	0.42	0.054	1.89621e-94	2.96826e-112	2.84818	0.353	0.054	7.59458e-108
GINS3	6.66136e-85	2.84504	2.60352e-89	3.5485	0.364	0.033	6.66136e-85	2.9763e-104	3.15049	0.399	0.045	7.61517e-100	4.48679e-96	2.84504	0.297	0.044	1.14799e-91
PKMYT1	3.53056e-42	2.83669	1.37988e-46	3.05406	0.26	0.034	3.53056e-42	1.01241e-71	3.0486	0.311	0.04	2.59034e-67	1.9801e-80	2.83669	0.252	0.038	5.06629e-76
MCM6	2.90525e-114	2.8186	1.13548e-118	3.10288	0.942	0.295	2.90525e-114	1.07228e-156	2.97824	0.966	0.322	2.74352e-152	1.17009e-249	2.8186	0.974	0.39	2.9938e-245
BRCA1	8.27983e-103	2.80886	3.23608e-107	3.07639	0.925	0.298	8.27983e-103	6.76407e-140	2.95953	0.92	0.297	1.73066e-135	2.28466e-239	2.80886	0.932	0.281	5.84554e-235
LIG1	1.70785e-112	2.79769	6.67493e-117	2.91994	0.867	0.195	1.70785e-112	1.28679e-145	2.85692	0.866	0.207	3.29238e-141	1.09433e-225	2.79769	0.846	0.214	2.79996e-221
FANCI	5.35e-115	2.79561	2.09099e-119	3.1105	0.925	0.239	5.35e-115	6.91788e-160	2.87213	0.941	0.243	1.77001e-155	1.17675e-232	2.79561	0.909	0.261	3.01085e-228
TTPA	6.84198e-74	2.77525	2.67411e-78	2.89005	0.48	0.07	6.84198e-74	9.9494e-96	2.77525	0.513	0.086	2.54565e-91	2.88731e-84	2.95164	0.269	0.041	7.38748e-80
HELLS	1.75064e-112	2.73811	6.84217e-117	3.19477	0.971	0.353	1.75064e-112	3.8608e-157	3.14126	0.987	0.381	9.87823e-153	4.58205e-250	2.73811	0.995	0.43	1.17236e-245
CENPK	1.54781e-117	2.73618	6.04945e-122	2.98428	0.954	0.259	1.54781e-117	5.13697e-154	2.73959	0.95	0.26	1.31434e-149	1.63462e-258	2.73618	0.942	0.244	4.18235e-254
DSN1	3.27618e-133	2.71396	1.98448e-140	3.08556	0.821	0.131	5.0775e-136	1.28046e-137	2.71396	0.748	0.141	3.27618e-133	1.1905e-218	2.83003	0.743	0.148	3.04601e-214
CHEK1	2.73995e-109	2.70385	1.07088e-113	3.15317	0.884	0.228	2.73995e-109	1.29948e-148	2.91848	0.908	0.244	3.32486e-144	4.74684e-242	2.70385	0.918	0.256	1.21453e-237
FEN1	8.04488e-149	2.70214	3.14425e-153	3.43435	0.809	0.119	8.04488e-149	3.08448e-174	3.08823	0.84	0.152	7.89195e-170	1.46932e-199	2.70214	0.699	0.139	3.7594e-195
ASF1B	1.25532e-112	2.68561	4.90628e-117	3.129	0.607	0.077	1.25532e-112	7.85742e-154	3.09704	0.681	0.099	2.0104e-149	2.95989e-149	2.68561	0.542	0.102	7.57317e-145
AUNIP	8.95629e-80	2.68041	3.50047e-84	3.10258	0.486	0.067	8.95629e-80	1.0616e-97	2.73104	0.529	0.09	2.71621e-93	2.44594e-121	2.68041	0.449	0.083	6.25819e-117
AC002116.2	6.11434e-51	2.67583	2.38972e-55	2.98296	0.329	0.046	6.11434e-51	8.95049e-73	2.88598	0.357	0.053	2.29007e-68	4.25382e-77	2.67583	0.283	0.05	1.08838e-72
MCM4	2.81535e-124	2.67478	1.10035e-128	3.08594	0.942	0.238	2.81535e-124	2.27408e-148	2.83082	0.933	0.279	5.81846e-144	4.5179e-234	2.67478	0.921	0.28	1.15595e-229
RFC4	2.34655e-98	2.6406	9.17121e-103	2.95049	0.74	0.147	2.34655e-98	3.86485e-128	2.8179	0.765	0.166	9.88862e-124	7.58029e-169	2.6406	0.701	0.171	1.93949e-164
POLA2	2.52843e-74	2.63488	9.8821e-79	2.71758	0.618	0.122	2.52843e-74	4.59939e-116	2.82835	0.651	0.122	1.1768e-111	2.55202e-143	2.63488	0.572	0.123	6.5296e-139
RBL1	5.2368e-107	2.6213	2.04674e-111	2.95493	0.965	0.33	5.2368e-107	1.19225e-138	2.78402	0.945	0.32	3.05048e-134	1.30926e-232	2.6213	0.979	0.371	3.34988e-228
SLC43A3	2.26931e-83	2.61002	8.86933e-88	3.3552	0.405	0.043	2.26931e-83	5.93819e-95	3.05141	0.412	0.054	1.51934e-90	3.54711e-92	2.61002	0.348	0.064	9.07565e-88
RFC3	2.26084e-95	2.60523	8.83626e-100	2.83333	0.827	0.198	2.26084e-95	3.85253e-131	2.76051	0.878	0.24	9.85709e-127	3.79632e-190	2.60523	0.827	0.24	9.71326e-186
FANCB	4.37338e-85	2.60414	1.70929e-89	2.73123	0.815	0.221	4.37338e-85	8.98018e-139	2.91958	0.845	0.211	2.29767e-134	9.73307e-195	2.60414	0.79	0.202	2.4903e-190
POLE2	1.8379e-101	2.60085	7.18322e-106	2.84525	0.85	0.209	1.8379e-101	1.74368e-134	2.81485	0.815	0.192	4.46137e-130	2.67457e-188	2.60085	0.79	0.211	6.84316e-184
POLQ	1.88753e-137	2.54713	7.3772e-142	3.31887	0.647	0.072	1.88753e-137	5.24323e-192	3.16853	0.748	0.094	1.34153e-187	2.33012e-185	2.54713	0.61	0.103	5.96184e-181
RIBC2	5.23882e-85	2.54185	2.04754e-89	3.04272	0.52	0.074	5.23882e-85	6.82294e-103	2.83108	0.521	0.083	1.74572e-98	1.37891e-131	2.54185	0.498	0.095	3.52808e-127
RAD54B	1.1078e-72	2.53941	5.25947e-82	2.80499	0.572	0.098	1.34569e-77	4.3297e-77	2.63009	0.504	0.104	1.1078e-72	7.50237e-124	2.53941	0.481	0.095	1.91956e-119
LRRC26	1.59636e-36	2.51433	6.2392e-41	2.51433	0.335	0.063	1.59636e-36	6.90191e-72	2.76691	0.412	0.072	1.76592e-67	1.74645e-83	2.6887	0.315	0.058	4.46846e-79
ATAD5	1.09402e-90	2.51239	4.27584e-95	2.76527	0.919	0.309	1.09402e-90	2.85815e-134	2.7625	0.912	0.288	7.31285e-130	6.61874e-190	2.51239	0.883	0.296	1.69347e-185
MCM7	1.63237e-96	2.50065	6.37994e-101	2.66401	0.913	0.273	1.63237e-96	3.50077e-140	2.76072	0.916	0.272	8.95708e-136	1.25118e-208	2.50065	0.893	0.275	3.20126e-204
CCNE1	3.35854e-60	2.47062	1.31265e-64	2.94015	0.462	0.082	3.35854e-60	2.23155e-76	2.8046	0.466	0.09	5.70965e-72	4.82772e-76	2.47062	0.339	0.073	1.23522e-71
CDC25A	1.25152e-75	2.46732	4.89144e-80	2.83719	0.59	0.109	1.25152e-75	3.74915e-93	2.69671	0.58	0.118	9.59258e-89	1.38953e-113	2.46732	0.505	0.115	3.55525e-109
AC008543.1	7.91265e-44	2.46091	3.09257e-48	2.53263	0.376	0.067	7.91265e-44	8.96119e-50	2.54259	0.357	0.076	2.29281e-45	2.63706e-82	2.46091	0.36	0.077	6.74717e-78
DNA2	2.41497e-74	2.45183	9.43865e-79	2.56174	0.769	0.205	2.41497e-74	1.24234e-97	2.59585	0.761	0.22	3.17865e-93	7.81417e-163	2.45183	0.752	0.21	1.99933e-158
DHFR	2.51634e-70	2.44138	9.83482e-75	2.60102	0.861	0.325	2.51634e-70	2.97055e-113	2.60225	0.903	0.346	7.60044e-109	2.73319e-165	2.44138	0.867	0.341	6.99314e-161
ZNF695	6.08229e-70	2.43539	2.3772e-74	2.60325	0.607	0.123	6.08229e-70	2.87502e-87	2.45779	0.626	0.147	7.35602e-83	2.19505e-127	2.43539	0.568	0.133	5.61626e-123
ATAD2	2.04654e-84	2.42803	7.99868e-89	2.68436	0.954	0.456	2.04654e-84	6.32642e-130	2.70468	0.987	0.456	1.61868e-125	3.96404e-189	2.42803	0.953	0.436	1.01424e-184
PRIM1	1.91067e-114	2.4255	7.46763e-119	3.05931	0.705	0.108	1.91067e-114	1.35254e-154	2.99441	0.761	0.132	3.4606e-150	3.37179e-163	2.4255	0.696	0.166	8.62706e-159
MCM3	1.46661e-96	2.42413	5.73207e-101	2.69266	0.977	0.474	1.46661e-96	2.73694e-133	2.59303	0.975	0.505	7.00273e-129	4.16755e-217	2.42413	0.986	0.492	1.06631e-212
PCNA	3.68746e-67	2.42372	1.4412e-71	2.43496	0.89	0.422	3.68746e-67	4.11629e-92	2.42372	0.916	0.456	1.0532e-87	3.70963e-167	2.59223	0.921	0.469	9.49145e-163
TK1	2.78426e-61	2.41522	1.0882e-65	2.72974	0.642	0.162	2.78426e-61	2.63079e-104	2.64672	0.744	0.188	6.73114e-100	3.14396e-147	2.41522	0.713	0.2	8.04414e-143
CENPM	1.07167e-79	2.40902	4.18849e-84	2.56324	0.63	0.116	1.07167e-79	1.03767e-107	2.60762	0.639	0.124	2.65499e-103	1.05552e-153	2.40902	0.603	0.123	2.70065e-149
RAD51AP1	9.36618e-112	2.38904	3.66066e-116	2.98289	0.584	0.07	9.36618e-112	1.06945e-136	2.68646	0.634	0.091	2.73629e-132	9.46722e-153	2.38904	0.542	0.095	2.42228e-148
UNG	2.50227e-67	2.36539	9.77983e-72	2.36539	0.896	0.46	2.50227e-67	5.36347e-107	2.3972	0.929	0.454	1.3723e-102	5.47703e-174	2.38163	0.9	0.391	1.40135e-169
MYBL1	1.42808e-51	2.33224	5.5815e-56	2.6656	0.358	0.053	1.42808e-51	2.40775e-82	2.72649	0.441	0.072	6.16046e-78	4.1194e-81	2.33224	0.393	0.092	1.05399e-76
RFC2	5.05945e-80	2.31769	1.97743e-84	2.45525	0.78	0.192	5.05945e-80	1.86503e-85	2.31769	0.731	0.214	4.77187e-81	3.09907e-150	2.35923	0.722	0.202	7.92929e-146
POLD1	2.55075e-48	2.3115	9.96932e-53	2.3115	0.486	0.103	2.55075e-48	1.52187e-75	2.58805	0.487	0.099	3.89386e-71	2.89956e-101	2.39052	0.467	0.109	7.41882e-97
MMS22L	3.43554e-85	2.26813	1.34274e-89	2.41267	0.977	0.583	3.43554e-85	1.09072e-116	2.44304	0.979	0.579	2.79072e-112	1.23157e-198	2.26813	0.991	0.598	3.15108e-194
CDC7	6.81214e-82	2.26288	2.66245e-86	2.66799	0.647	0.122	6.81214e-82	1.6207e-89	2.4064	0.634	0.144	4.14672e-85	5.06858e-119	2.26288	0.605	0.162	1.29685e-114
TICRR	2.44643e-63	2.25927	9.56162e-68	2.90853	0.37	0.047	2.44643e-63	1.01012e-77	2.63378	0.403	0.063	2.5845e-73	1.22861e-84	2.25927	0.353	0.069	3.14353e-80
CHAF1B	3.45012e-77	2.25411	1.34844e-81	2.66066	0.682	0.147	3.45012e-77	2.46858e-108	2.63706	0.697	0.153	6.31612e-104	6.80826e-127	2.25411	0.659	0.186	1.74196e-122
POLE	6.38386e-71	2.24672	2.49506e-75	2.24672	0.873	0.307	6.38386e-71	2.82649e-102	2.35377	0.874	0.308	7.23186e-98	1.77461e-180	2.33272	0.881	0.296	4.54052e-176
FANCD2	3.00036e-45	2.23969	1.17266e-49	2.35535	0.526	0.131	3.00036e-45	6.88431e-104	2.62582	0.639	0.128	1.76142e-99	1.6672e-121	2.23969	0.563	0.133	4.2657e-117
AP001347.1	4.57426e-53	2.23691	1.14185e-65	2.54008	0.543	0.107	2.92155e-61	1.7878e-57	2.23691	0.487	0.123	4.57426e-53	9.95882e-120	2.34147	0.551	0.131	2.54806e-115
WDR62	8.93009e-77	2.23358	1.98127e-89	2.85173	0.503	0.066	5.06928e-85	3.49023e-81	2.26427	0.5	0.092	8.93009e-77	8.84865e-88	2.23358	0.416	0.095	2.26401e-83
DDX11	3.09299e-75	2.23294	1.20886e-79	2.63114	0.769	0.211	3.09299e-75	4.89052e-112	2.39867	0.84	0.241	1.25129e-107	7.89474e-140	2.23294	0.755	0.245	2.01995e-135
NCAPG2	5.67894e-100	2.2276	2.21955e-104	2.59585	0.757	0.144	5.67894e-100	1.208e-106	2.36574	0.761	0.188	3.09079e-102	5.7281e-183	2.2276	0.755	0.174	1.46559e-178
SLFN13	4.63658e-74	2.21615	1.81216e-78	2.54142	0.751	0.194	4.63658e-74	3.46708e-97	2.5311	0.727	0.198	8.87088e-93	7.35529e-141	2.21615	0.759	0.238	1.88192e-136
FAM161A	6.75944e-55	2.19696	2.64185e-59	2.28151	0.659	0.18	6.75944e-55	3.68191e-105	2.52958	0.731	0.176	9.42053e-101	2.03136e-111	2.19696	0.605	0.171	5.19744e-107
MCM8	3.61072e-45	2.17568	1.41121e-49	2.17568	0.624	0.182	3.61072e-45	2.2142e-86	2.38234	0.655	0.16	5.66525e-82	1.36526e-164	2.43728	0.806	0.256	3.49315e-160
DIAPH3	4.44e-70	2.17151	1.73533e-74	2.51538	0.601	0.119	4.44e-70	3.38371e-115	2.59098	0.693	0.141	8.65756e-111	4.24264e-144	2.17151	0.65	0.154	1.08552e-139
TIMELESS	2.90181e-77	2.16585	1.13414e-81	2.51229	0.769	0.205	2.90181e-77	9.0095e-117	2.4142	0.849	0.232	2.30517e-112	1.27009e-140	2.16585	0.762	0.24	3.24964e-136
MELK	3.43366e-90	2.15988	1.34201e-94	2.45764	0.763	0.161	3.43366e-90	1.63017e-110	2.29663	0.761	0.177	4.17096e-106	3.29867e-163	2.15988	0.722	0.172	8.43997e-159
CEP128	4.77648e-71	2.13207	1.86683e-75	2.54335	0.642	0.138	4.77648e-71	3.58246e-114	2.38038	0.752	0.164	9.16609e-110	1.80624e-132	2.13207	0.699	0.199	4.62145e-128
C1orf112	2.24745e-39	2.11952	8.78391e-44	2.11952	0.486	0.12	2.24745e-39	9.85638e-52	2.21036	0.45	0.115	2.52185e-47	6.32706e-87	2.21438	0.456	0.117	1.61884e-82
RFC5	1.01448e-57	2.09755	3.96497e-62	2.09755	0.809	0.302	1.01448e-57	1.78506e-101	2.22441	0.861	0.284	4.56727e-97	2.72396e-124	2.11852	0.734	0.252	6.96953e-120
VRK1	2.48914e-69	2.08701	9.72854e-74	2.22617	0.913	0.399	2.48914e-69	3.45594e-97	2.09907	0.933	0.425	8.84237e-93	7.53412e-149	2.08701	0.89	0.378	1.92768e-144
POLA1	8.08739e-73	2.07711	3.16087e-77	2.18795	0.971	0.58	8.08739e-73	2.67173e-103	2.19636	0.983	0.567	6.83589e-99	5.86124e-173	2.07711	0.984	0.591	1.49966e-168
CNTLN	1.08233e-62	2.07007	4.23015e-67	2.51876	0.607	0.132	1.08233e-62	2.56303e-82	2.23309	0.689	0.184	6.55776e-78	3.98693e-122	2.07007	0.722	0.231	1.0201e-117
RRM1	2.70161e-59	2.06176	1.05589e-63	2.13289	0.884	0.373	2.70161e-59	2.68198e-106	2.13707	0.95	0.396	6.8621e-102	2.94596e-151	2.06176	0.871	0.352	7.53754e-147
PLK4	1.16368e-57	2.05159	4.54812e-62	2.21649	0.526	0.103	1.16368e-57	1.61243e-72	2.07503	0.534	0.115	4.12557e-68	5.88494e-94	2.05159	0.47	0.112	1.50572e-89
IL17RB	3.42474e-28	2.0379	1.33852e-32	2.11274	0.416	0.115	3.42474e-28	1.31845e-45	2.07136	0.441	0.121	3.37338e-41	6.68841e-78	2.0379	0.479	0.139	1.7113e-73
TONSL	1.33054e-31	2.03559	5.20028e-36	2.03559	0.445	0.118	1.33054e-31	2.91e-58	2.31304	0.462	0.11	7.44553e-54	4.09205e-61	2.1251	0.36	0.097	1.04699e-56
TYMS	3.70535e-59	2.02935	1.44819e-63	2.17288	0.85	0.34	3.70535e-59	3.28422e-87	2.05	0.903	0.388	8.40301e-83	4.06095e-135	2.02935	0.85	0.343	1.03903e-130
MYO19	3.25897e-80	2.02855	1.27373e-84	2.37794	0.96	0.467	3.25897e-80	1.6686e-98	2.1513	0.954	0.52	4.26928e-94	3.36924e-157	2.02855	0.944	0.554	8.62053e-153
CENPJ	4.3642e-68	2.02124	1.7057e-72	2.29803	0.688	0.162	4.3642e-68	1.829e-83	2.16377	0.672	0.17	4.67969e-79	5.47134e-126	2.02124	0.668	0.184	1.3999e-121
CU638689.4	1.50962e-33	2.02101	5.90017e-38	2.0501	0.451	0.116	1.50962e-33	1.67504e-49	2.20045	0.42	0.104	4.28575e-45	6.28721e-82	2.02101	0.432	0.108	1.60865e-77
CDK2	9.2529e-40	2.01474	3.61639e-44	2.01474	0.618	0.197	9.2529e-40	2.73138e-83	2.27766	0.681	0.182	6.9885e-79	1.14423e-90	2.09937	0.523	0.149	2.92762e-86
KIF24	8.10407e-31	2.01165	3.16738e-35	2.01165	0.376	0.086	8.10407e-31	1.39926e-59	2.34641	0.412	0.084	3.58014e-55	2.80121e-58	2.27827	0.313	0.078	7.16718e-54
ZNF519	1.31627e-43	2.00698	5.14451e-48	2.15371	0.555	0.146	1.31627e-43	2.05477e-53	2.04168	0.529	0.153	5.25733e-49	6.76896e-85	2.00698	0.528	0.159	1.73191e-80
DONSON	1.75492e-45	1.99857	6.85892e-50	1.99857	0.699	0.232	1.75492e-45	4.99402e-60	2.02796	0.651	0.223	1.27777e-55	6.83922e-99	2.0714	0.619	0.202	1.74988e-94
XRCC3	3.49812e-48	1.99589	1.3672e-52	1.99589	0.647	0.181	3.49812e-48	1.16897e-72	2.21342	0.651	0.188	2.99092e-68	5.62511e-123	2.24448	0.624	0.169	1.43924e-118
MSH2	4.41261e-65	1.98887	1.72462e-69	2.13572	0.925	0.455	4.41261e-65	6.11151e-94	2.13536	0.945	0.502	1.56369e-89	1.05092e-166	1.98887	0.974	0.541	2.68887e-162
BARD1	1.13112e-59	1.98431	4.42085e-64	2.13262	0.902	0.471	1.13112e-59	9.63997e-90	2.04069	0.924	0.442	2.46648e-85	9.83455e-163	1.98431	0.972	0.564	2.51627e-158
C4orf46	8.74716e-42	1.95765	3.41873e-46	2.21232	0.462	0.105	8.74716e-42	1.29558e-60	2.18186	0.508	0.127	3.31488e-56	3.17717e-62	1.95765	0.4	0.116	8.12911e-58
MSH6	1.23625e-49	1.95646	4.83173e-54	1.95646	0.855	0.417	1.23625e-49	2.0782e-76	1.98751	0.87	0.434	5.31728e-72	1.4544e-157	2.04903	0.928	0.469	3.72124e-153
PASK	2.0883e-32	1.94626	8.16189e-37	2.18373	0.393	0.092	2.0883e-32	9.31572e-51	2.13546	0.441	0.11	2.38352e-46	3.03976e-79	1.94626	0.5	0.148	7.77752e-75
CENPQ	4.088e-31	1.94279	1.59775e-35	1.94279	0.451	0.121	4.088e-31	3.33425e-79	2.36263	0.559	0.123	8.53101e-75	8.87736e-99	2.26547	0.47	0.11	2.27136e-94
RRM2	7.71429e-38	1.94097	3.01504e-42	2.58477	0.457	0.115	7.71429e-38	5.23653e-73	2.33179	0.571	0.14	1.33982e-68	7.21951e-97	1.94097	0.547	0.148	1.84718e-92
HAUS8	1.0805e-33	1.93738	4.22303e-38	2.05691	0.486	0.136	1.0805e-33	3.40813e-47	1.93738	0.483	0.138	8.72004e-43	1.37137e-68	1.95879	0.418	0.117	3.50879e-64
FIGNL1	8.14054e-42	1.93485	3.18164e-46	1.93485	0.613	0.18	8.14054e-42	2.17667e-74	2.24544	0.634	0.175	5.56923e-70	3.46754e-119	2.15587	0.619	0.168	8.87205e-115
LMNB1	7.11332e-77	1.92881	2.78016e-81	2.21749	0.902	0.304	7.11332e-77	1.72187e-95	1.95412	0.916	0.334	4.40558e-91	1.83339e-138	1.92881	0.853	0.324	4.69091e-134
LEF1	5.3048e-43	1.9168	6.53257e-56	2.26314	0.624	0.163	1.67142e-51	2.07332e-47	1.9168	0.571	0.194	5.3048e-43	7.78643e-90	2.12837	0.551	0.169	1.99224e-85
MASTL	3.79139e-33	1.89382	1.48182e-37	2.07204	0.566	0.193	3.79139e-33	9.82624e-53	1.95047	0.588	0.195	2.51414e-48	8.18416e-73	1.89382	0.526	0.179	2.094e-68
NEMP1	3.31143e-50	1.8809	1.29424e-54	1.8809	0.746	0.238	3.31143e-50	2.92136e-78	2.10422	0.752	0.247	7.4746e-74	2.21488e-109	1.93879	0.699	0.231	5.66698e-105
PRIM2	1.50062e-60	1.88075	5.86501e-65	2.07919	0.919	0.468	1.50062e-60	1.77181e-90	1.99141	0.95	0.467	4.53336e-86	3.96001e-148	1.88075	0.963	0.492	1.01321e-143
RMI1	7.51387e-49	1.8727	2.93671e-53	2.07787	0.705	0.223	7.51387e-49	3.54889e-61	1.8727	0.693	0.243	9.08018e-57	5.83616e-101	1.93648	0.64	0.203	1.49324e-96
POLD3	4.75057e-54	1.86722	1.85671e-58	1.89883	0.89	0.442	4.75057e-54	6.28539e-79	1.86722	0.903	0.423	1.60818e-74	4.24364e-139	1.92756	0.886	0.399	1.08578e-134
CENPI	1.37417e-68	1.84715	5.37079e-73	2.40193	0.445	0.062	1.37417e-68	1.34065e-91	2.35137	0.496	0.08	3.43018e-87	4.07123e-85	1.84715	0.393	0.083	1.04166e-80
AIF1L	8.41124e-29	1.84499	8.31202e-35	2.3418	0.329	0.07	2.12671e-30	3.28744e-33	2.04801	0.307	0.078	8.41124e-29	9.27101e-38	1.84499	0.294	0.096	2.37208e-33
LYPD6	1.07847e-31	1.84071	4.21509e-36	1.84071	0.474	0.128	1.07847e-31	8.70016e-67	2.16298	0.576	0.148	2.22602e-62	5.88008e-77	1.90077	0.519	0.163	1.50448e-72
ESCO2	4.4753e-35	1.81166	1.74912e-39	2.26627	0.335	0.065	4.4753e-35	2.51594e-66	2.21824	0.445	0.088	6.43728e-62	3.76422e-41	1.81166	0.28	0.082	9.63114e-37
ZWINT	1.88728e-35	1.8051	7.37623e-40	2.01313	0.503	0.138	1.88728e-35	5.26298e-74	2.01432	0.63	0.162	1.34659e-69	1.44303e-87	1.8051	0.547	0.158	3.69213e-83
DDX11-AS1	1.48253e-26	1.8009	5.79429e-31	1.8009	0.428	0.121	1.48253e-26	4.22866e-60	2.09579	0.496	0.12	1.08194e-55	4.28414e-81	2.0419	0.465	0.126	1.09614e-76
SLF1	1.42492e-47	1.79792	5.56915e-52	1.89417	0.815	0.334	1.42492e-47	2.11527e-59	1.79792	0.773	0.33	5.41212e-55	1.07878e-104	1.87629	0.759	0.31	2.76017e-100
DNMT1	1.75132e-69	1.79532	6.84482e-74	2.05157	0.954	0.563	1.75132e-69	2.50363e-107	1.96004	0.992	0.618	6.40578e-103	3.49364e-157	1.79532	0.972	0.597	8.93883e-153
CDCA5	2.23329e-44	1.7942	8.72857e-49	2.58208	0.329	0.051	2.23329e-44	1.25203e-54	2.31323	0.353	0.066	3.20345e-50	2.27212e-58	1.7942	0.304	0.07	5.81345e-54
CCDC150	2.2999e-47	1.77545	8.9889e-52	2.54097	0.37	0.061	2.2999e-47	7.30018e-53	2.19998	0.382	0.08	1.86782e-48	1.143e-67	1.77545	0.407	0.109	2.92447e-63
RAD18	9.77467e-44	1.7726	3.82032e-48	1.87416	0.832	0.392	9.77467e-44	1.37655e-75	1.9719	0.857	0.372	3.52205e-71	2.3059e-112	1.7726	0.843	0.384	5.89988e-108
GMNN	3.65943e-52	1.76886	1.43025e-56	1.76886	0.884	0.391	3.65943e-52	1.21366e-69	1.86436	0.861	0.428	3.10528e-65	1.82869e-105	1.89883	0.769	0.327	4.67888e-101
SLFN11	2.40425e-24	1.76303	9.39673e-29	2.27784	0.283	0.062	2.40425e-24	4.21131e-50	2.54531	0.332	0.065	1.07751e-45	3.92242e-50	1.76303	0.397	0.133	1.00359e-45
NCAPD3	1.34347e-43	1.75532	5.2508e-48	1.75532	0.809	0.349	1.34347e-43	3.66864e-81	1.82631	0.887	0.368	9.38658e-77	3.98458e-116	1.84699	0.797	0.313	1.0195e-111
PBX3	1.44516e-39	1.74791	5.64826e-44	1.85216	0.74	0.295	1.44516e-39	3.15393e-60	1.82977	0.777	0.296	8.06964e-56	2.83559e-93	1.74791	0.762	0.314	7.25515e-89
NASP	7.81227e-80	1.74429	3.05334e-84	1.89019	0.994	0.836	7.81227e-80	3.86028e-112	1.79521	1	0.863	9.87691e-108	8.06091e-189	1.74429	0.995	0.829	2.06247e-184
COCH	2.68885e-12	1.72249	1.05091e-16	2.0147	0.306	0.108	2.68885e-12	3.35734e-23	1.72249	0.34	0.121	8.5901e-19	2.78946e-57	2.05532	0.402	0.128	7.13712e-53
SYTL4	2.4719e-26	1.71939	9.66113e-31	1.71939	0.514	0.175	2.4719e-26	1.75359e-38	1.80888	0.483	0.161	4.48674e-34	7.85091e-45	1.73556	0.362	0.121	2.00873e-40
CENPH	2.11755e-44	1.71518	8.27622e-49	2.00936	0.647	0.2	2.11755e-44	4.40322e-51	1.75737	0.655	0.237	1.12661e-46	4.83995e-83	1.71518	0.657	0.251	1.23835e-78
TIAM1	1.84557e-30	1.68806	7.21319e-35	1.69029	0.74	0.33	1.84557e-30	3.50361e-60	1.68806	0.849	0.388	8.96435e-56	7.09939e-87	1.75303	0.759	0.346	1.81645e-82
HAUS5	4.67743e-21	1.68764	1.82812e-25	1.68764	0.428	0.14	4.67743e-21	3.16677e-45	1.94955	0.471	0.136	8.10251e-41	1.10929e-73	1.91908	0.467	0.137	2.83823e-69
HES4	4.87171e-31	1.68535	4.45722e-36	2.0595	0.462	0.128	1.14042e-31	7.17301e-46	1.99377	0.445	0.12	1.83529e-41	1.90405e-35	1.68535	0.304	0.104	4.87171e-31
CIP2A	6.49582e-57	1.68449	2.53882e-61	2.1168	0.509	0.094	6.49582e-57	8.61072e-70	1.87519	0.538	0.119	2.20314e-65	2.13442e-67	1.68449	0.442	0.127	5.46112e-63
MTBP	4.86097e-40	1.66573	1.89986e-44	1.8212	0.682	0.224	4.86097e-40	1.41107e-72	1.99521	0.727	0.238	3.61037e-68	4.86002e-82	1.66573	0.64	0.232	1.24348e-77
SASS6	3.64101e-51	1.66131	1.42305e-55	2.10411	0.659	0.182	3.64101e-51	7.51747e-91	2.15076	0.718	0.184	1.92342e-86	4.57893e-77	1.66131	0.586	0.202	1.17156e-72
EZH2	2.46472e-42	1.6586	9.6331e-47	1.77252	0.879	0.498	2.46472e-42	1.44194e-63	1.6586	0.908	0.53	3.68934e-59	3.30874e-121	1.81339	0.916	0.499	8.46574e-117
LRRC8C	5.6798e-18	1.65448	2.21989e-22	1.86389	0.341	0.103	5.6798e-18	8.88923e-26	1.65448	0.345	0.112	2.2744e-21	8.16442e-36	1.75256	0.285	0.093	2.08895e-31
KANK2	9.72839e-29	1.64891	3.80223e-33	1.66087	0.636	0.249	9.72839e-29	2.19716e-54	1.81431	0.63	0.211	5.62164e-50	1.47032e-51	1.64891	0.491	0.195	3.76197e-47
TRIP13	8.6601e-38	1.64232	1.916e-63	2.46749	0.486	0.087	4.90227e-59	2.51553e-56	2.08211	0.458	0.108	6.43623e-52	3.3847e-42	1.64232	0.334	0.107	8.6601e-38
ZWILCH	2.3085e-29	1.64091	9.02252e-34	1.91413	0.509	0.162	2.3085e-29	2.46792e-36	1.64091	0.5	0.177	6.31441e-32	1.14608e-69	1.92721	0.467	0.144	2.93236e-65
GNAL	5.3561e-26	1.62485	2.09337e-30	1.92342	0.491	0.162	5.3561e-26	1.57798e-35	1.92631	0.475	0.17	4.03743e-31	1.56732e-49	1.62485	0.502	0.213	4.01014e-45
SLC25A19	1.35373e-19	1.6245	5.2909e-24	1.83233	0.387	0.124	1.35373e-19	1.50016e-26	1.6245	0.382	0.133	3.83831e-22	8.96708e-31	1.6767	0.283	0.101	2.29432e-26
C3orf70	4.51107e-20	1.62264	1.7631e-24	1.63621	0.405	0.129	4.51107e-20	1.10997e-32	1.70654	0.387	0.117	2.83997e-28	1.45357e-27	1.62264	0.287	0.111	3.7191e-23
RFWD3	5.35339e-35	1.6115	2.09231e-39	1.66014	0.809	0.405	5.35339e-35	2.87157e-56	1.6115	0.84	0.41	7.3472e-52	1.87082e-106	1.72363	0.836	0.379	4.78667e-102
HAT1	1.83227e-51	1.6034	7.16123e-56	1.7974	0.902	0.454	1.83227e-51	5.47813e-68	1.64139	0.908	0.473	1.40163e-63	1.45698e-126	1.6034	0.953	0.548	3.72783e-122
TOPBP1	1.79973e-53	1.58307	7.03403e-58	1.62459	0.965	0.635	1.79973e-53	9.94555e-70	1.58307	0.954	0.63	2.54467e-65	3.30489e-133	1.63815	0.965	0.593	8.45589e-129
RAD51D	1.81451e-29	1.57883	4.88983e-37	1.93503	0.526	0.16	1.25111e-32	7.09182e-34	1.57883	0.513	0.191	1.81451e-29	2.94971e-62	1.68703	0.537	0.201	7.54713e-58
Z94721.1	2.38375e-24	1.57431	9.31663e-29	1.79976	0.486	0.165	2.38375e-24	2.17816e-46	1.76896	0.542	0.173	5.57304e-42	3.06116e-53	1.57431	0.463	0.165	7.83228e-49
DGCR9	4.06044e-17	1.57001	1.29244e-29	2.05109	0.358	0.092	3.30684e-25	1.58698e-21	1.74493	0.294	0.099	4.06044e-17	2.03158e-37	1.57001	0.369	0.141	5.19801e-33
DUT	1.30367e-40	1.55719	5.09524e-45	1.55719	0.954	0.762	1.30367e-40	6.47237e-65	1.6771	0.971	0.772	1.65602e-60	4.74179e-104	1.58988	0.944	0.711	1.21323e-99
STIL	1.26029e-40	1.5538	4.9257e-45	1.81767	0.74	0.275	1.26029e-40	1.1628e-48	1.5538	0.714	0.304	2.97515e-44	2.24948e-109	1.72196	0.778	0.288	5.75551e-105
GPAT2	1.5765e-18	1.5527	6.16157e-23	1.5527	0.445	0.16	1.5765e-18	2.25943e-40	1.6946	0.534	0.186	5.78099e-36	3.0136e-51	1.63105	0.491	0.194	7.7106e-47
MND1	8.79846e-17	1.54967	3.43878e-21	1.54967	0.491	0.205	8.79846e-17	2.33589e-48	1.75157	0.613	0.219	5.9766e-44	8.18639e-54	1.60932	0.509	0.2	2.09457e-49
C21orf58	2.82665e-17	1.54589	1.10477e-21	1.69732	0.318	0.092	2.82665e-17	2.36271e-30	1.72138	0.366	0.113	6.04524e-26	1.14559e-36	1.54589	0.308	0.103	2.93111e-32
TEX30	2.41912e-17	1.53499	9.45486e-22	1.58636	0.422	0.15	2.41912e-17	1.16332e-36	1.70294	0.479	0.162	2.97648e-32	1.09435e-41	1.53499	0.371	0.13	2.8e-37
NDUFAF6	5.91604e-43	1.53331	2.31222e-47	1.69065	0.925	0.662	5.91604e-43	4.21616e-55	1.53331	0.941	0.681	1.07875e-50	9.56509e-102	1.66288	0.923	0.663	2.44732e-97
ASRGL1	1.07783e-26	1.52861	1.20461e-33	1.62484	0.543	0.172	3.08211e-29	4.21258e-31	1.52861	0.538	0.221	1.07783e-26	2.18184e-54	1.61784	0.528	0.212	5.58244e-50
LIN9	6.51204e-36	1.51238	2.69151e-42	1.69864	0.723	0.259	6.88648e-38	2.54516e-40	1.51264	0.626	0.244	6.51204e-36	4.84024e-55	1.51238	0.542	0.216	1.23842e-50
UBR7	1.57069e-32	1.50867	6.13885e-37	1.71695	0.659	0.245	1.57069e-32	5.38228e-37	1.50867	0.634	0.276	1.37711e-32	5.19726e-67	1.70288	0.561	0.21	1.32977e-62
USP37	4.70517e-39	1.50766	1.83896e-43	1.57605	0.902	0.57	4.70517e-39	2.98089e-59	1.50766	0.924	0.567	7.6269e-55	6.37844e-151	1.73994	0.974	0.631	1.63199e-146
FKBP5	9.80328e-31	1.50509	3.8315e-35	1.61176	0.786	0.401	9.80328e-31	1.02086e-45	1.50509	0.824	0.422	2.61197e-41	1.58999e-88	1.63849	0.82	0.418	4.06815e-84
USP1	2.51102e-56	1.49483	9.81405e-61	1.67488	0.942	0.578	2.51102e-56	2.77192e-80	1.66767	0.954	0.58	7.09223e-76	9.65993e-108	1.49483	0.916	0.541	2.47159e-103
SLBP	1.6566e-46	1.49475	6.47463e-51	1.57619	0.925	0.617	1.6566e-46	7.49947e-72	1.57573	0.95	0.643	1.91881e-67	1.81116e-96	1.49475	0.897	0.558	4.63404e-92
AC092821.3	3.81276e-18	1.494	1.43586e-22	1.91849	0.341	0.104	3.67379e-18	1.49017e-22	1.89815	0.286	0.092	3.81276e-18	4.72187e-28	1.494	0.332	0.139	1.20814e-23
MAD2L1	5.56356e-45	1.49147	2.17446e-49	1.79463	0.746	0.265	5.56356e-45	2.05335e-62	1.59236	0.773	0.293	5.25371e-58	9.8004e-94	1.49147	0.699	0.24	2.50753e-89
CDCA4	1.13107e-28	1.49068	3.16277e-34	1.81324	0.561	0.192	8.09226e-30	4.42066e-33	1.49068	0.508	0.193	1.13107e-28	5.73547e-58	1.71359	0.465	0.16	1.46748e-53
BMP8B	3.87711e-21	1.48861	1.51533e-25	1.70633	0.451	0.156	3.87711e-21	5.93598e-31	1.60814	0.437	0.152	1.51878e-26	7.74412e-30	1.48861	0.313	0.121	1.98141e-25
CDCA7	8.07044e-40	1.48459	3.15424e-44	1.48459	0.884	0.414	8.07044e-40	1.39617e-68	1.59842	0.945	0.465	3.57223e-64	2.97716e-112	1.56405	0.937	0.525	7.61737e-108
SMC2	1.77272e-50	1.48296	6.92848e-55	1.80512	0.815	0.311	1.77272e-50	6.01426e-73	1.72523	0.845	0.33	1.53881e-68	1.75064e-93	1.48296	0.769	0.316	4.4792e-89
KIAA1841	1.89574e-29	1.48115	7.40929e-34	1.48115	0.775	0.366	1.89574e-29	7.71362e-44	1.54958	0.744	0.36	1.97361e-39	1.65868e-87	1.73524	0.75	0.334	4.24389e-83
SHCBP1	6.26732e-46	1.47516	2.25823e-78	2.37444	0.439	0.055	5.77789e-74	2.55418e-94	2.39141	0.504	0.08	6.53514e-90	2.44951e-50	1.47516	0.308	0.08	6.26732e-46
C5orf34	4.72178e-20	1.47437	1.84545e-24	1.81752	0.347	0.099	4.72178e-20	2.22568e-25	1.71475	0.332	0.108	5.69463e-21	4.61515e-28	1.47437	0.273	0.1	1.18083e-23
DNAJC9	3.86475e-45	1.47355	1.51049e-49	1.57428	0.919	0.552	3.86475e-45	9.12899e-66	1.54495	0.929	0.547	2.33574e-61	2.32148e-98	1.47355	0.914	0.542	5.93975e-94
RECQL	1.36996e-37	1.47315	5.35435e-42	1.52997	0.861	0.448	1.36996e-37	5.33213e-57	1.56059	0.87	0.455	1.36428e-52	2.13007e-71	1.47315	0.769	0.408	5.44999e-67
EML5	1.09037e-16	1.47282	4.26159e-21	1.69696	0.382	0.132	1.09037e-16	4.58829e-27	1.47282	0.454	0.173	1.17396e-22	3.8884e-34	1.4817	0.386	0.159	9.94886e-30
LRR1	8.77932e-20	1.45567	3.4313e-24	1.45567	0.52	0.2	8.77932e-20	9.84319e-34	1.4687	0.555	0.22	2.51848e-29	1.97095e-60	1.58493	0.502	0.176	5.04287e-56
CASP8AP2	3.60458e-42	1.4548	1.40881e-46	1.54922	0.913	0.556	3.60458e-42	1.22839e-56	1.49182	0.908	0.572	3.14297e-52	6.97765e-89	1.4548	0.883	0.526	1.7853e-84
CENPX	1.56743e-41	1.44056	6.12611e-46	1.58846	0.936	0.676	1.56743e-41	1.43093e-65	1.59141	0.958	0.662	3.66119e-61	9.14512e-71	1.44056	0.827	0.55	2.33987e-66
STOX1	1.03729e-21	1.43743	4.05412e-26	1.49102	0.618	0.258	1.03729e-21	1.96872e-37	1.43743	0.626	0.261	5.03717e-33	2.96402e-50	1.47764	0.547	0.237	7.58373e-46
SKA3	1.13269e-21	1.43399	4.42698e-26	1.56497	0.387	0.112	1.13269e-21	2.85711e-37	1.67094	0.437	0.134	7.31021e-33	3.82803e-32	1.43399	0.341	0.133	9.79441e-28
BEND3	1.15195e-13	1.43024	4.50227e-18	1.48266	0.341	0.116	1.15195e-13	1.601e-18	1.44429	0.307	0.113	4.09632e-14	2.3658e-26	1.43024	0.292	0.115	6.05314e-22
TMEM107	1.05341e-17	1.42378	5.40032e-23	1.69595	0.393	0.13	1.38173e-18	8.73721e-24	1.61905	0.336	0.115	2.2355e-19	4.11712e-22	1.42378	0.252	0.101	1.05341e-17
MANEAL	1.22167e-20	1.41793	4.82828e-30	1.93058	0.422	0.123	1.23536e-25	4.77475e-25	1.63395	0.374	0.135	1.22167e-20	9.06264e-26	1.41793	0.308	0.128	2.31877e-21
RNF144A	1.33244e-16	1.41149	5.2077e-21	1.41149	0.555	0.248	1.33244e-16	1.39611e-42	1.52414	0.702	0.298	3.57209e-38	2.20847e-83	1.70971	0.701	0.288	5.65059e-79
MTSS1	6.1693e-16	1.4111	6.80653e-27	1.76667	0.405	0.12	1.74152e-22	2.4112e-20	1.4111	0.315	0.112	6.1693e-16	2.64405e-22	1.45248	0.259	0.105	6.76507e-18
NR2C2AP	2.09012e-23	1.407	8.16899e-28	1.61245	0.555	0.211	2.09012e-23	3.87588e-37	1.59504	0.555	0.21	9.91681e-33	4.23094e-31	1.407	0.393	0.174	1.08253e-26
MCUB	1.67218e-29	1.40267	6.53552e-34	1.68225	0.705	0.314	1.67218e-29	3.63885e-47	1.50928	0.761	0.352	9.31037e-43	4.72586e-59	1.40267	0.689	0.34	1.20916e-54
MIS18A	6.29386e-29	1.40201	2.45989e-33	1.56117	0.607	0.218	6.29386e-29	2.26598e-51	1.58389	0.668	0.236	5.79773e-47	9.01242e-51	1.40201	0.544	0.227	2.30592e-46
NT5DC2	1.11472e-14	1.39297	4.35674e-19	1.39297	0.445	0.174	1.11472e-14	4.2976e-40	1.77867	0.517	0.18	1.09958e-35	2.25912e-32	1.42993	0.381	0.16	5.78018e-28
ACD	1.27837e-10	1.39109	4.99638e-15	1.39109	0.335	0.126	1.27837e-10	8.79538e-19	1.56816	0.315	0.12	2.25039e-14	4.42594e-31	1.59158	0.28	0.098	1.13242e-26
UBE2T	2.66343e-35	1.38829	1.04097e-39	1.63323	0.751	0.326	2.66343e-35	3.42896e-68	1.57534	0.853	0.354	8.77334e-64	4.91754e-73	1.38829	0.701	0.302	1.2582e-68
AC004943.2	3.23747e-23	1.38827	1.26533e-27	1.38827	0.572	0.214	3.23747e-23	3.20393e-50	1.80799	0.639	0.228	8.19758e-46	2.21894e-99	1.93379	0.699	0.255	5.67737e-95
C9orf40	9.65829e-12	1.37983	3.77483e-16	1.44531	0.37	0.143	9.65829e-12	5.58016e-17	1.37983	0.34	0.143	1.42774e-12	2.00437e-29	1.47409	0.315	0.124	5.12839e-25
EXOSC9	3.66763e-26	1.37821	1.43345e-30	1.40326	0.711	0.314	3.66763e-26	4.70813e-37	1.43749	0.697	0.337	1.20462e-32	2.85468e-60	1.37821	0.678	0.322	7.30397e-56
PAQR4	1.10521e-08	1.37645	4.31958e-13	1.37645	0.335	0.139	1.10521e-08	8.89874e-41	2.03174	0.382	0.1	2.27683e-36	2.46801e-27	1.48472	0.273	0.101	6.31466e-23
AC010538.1	1.6019e-10	1.37387	3.4469e-18	1.55507	0.37	0.134	8.81924e-14	6.26083e-15	1.38874	0.303	0.127	1.6019e-10	3.23278e-25	1.37387	0.292	0.117	8.2714e-21
CEP152	8.5978e-32	1.36669	3.36035e-36	1.58107	0.705	0.295	8.5978e-32	8.89487e-43	1.36669	0.718	0.307	2.27584e-38	4.55471e-66	1.40955	0.685	0.302	1.16537e-61
TMEM109	6.27838e-14	1.36557	2.45384e-18	1.39703	0.457	0.191	6.27838e-14	3.65924e-26	1.5209	0.454	0.184	9.36254e-22	2.53476e-31	1.36557	0.418	0.191	6.48543e-27
NUP85	4.4333e-26	1.3613	1.73271e-30	1.3613	0.711	0.311	4.4333e-26	1.81268e-31	1.3971	0.643	0.321	4.63794e-27	1.72613e-54	1.4389	0.596	0.264	4.41647e-50
FANCM	5.28682e-34	1.36038	2.06629e-38	1.52664	0.705	0.253	5.28682e-34	6.16522e-45	1.54536	0.685	0.285	1.57743e-40	4.51792e-55	1.36038	0.598	0.25	1.15595e-50
RTTN	8.94793e-27	1.35623	3.4972e-31	1.35822	0.832	0.484	8.94793e-27	5.47467e-63	1.56995	0.916	0.472	1.40075e-58	2.75529e-88	1.35623	0.897	0.499	7.04968e-84
SLC29A1	2.47786e-15	1.35301	9.68442e-20	1.42567	0.439	0.169	2.47786e-15	1.23264e-25	1.41659	0.429	0.162	3.15384e-21	6.48083e-26	1.35301	0.353	0.159	1.65819e-21
STRIP2	3.14097e-26	1.35195	5.14636e-37	1.59072	0.647	0.23	1.31675e-32	1.22761e-30	1.35195	0.58	0.248	3.14097e-26	3.3697e-62	1.66023	0.505	0.176	8.62173e-58
POC1A	2.99035e-27	1.34194	1.67935e-39	1.93274	0.445	0.108	4.29678e-35	3.73186e-40	1.7563	0.433	0.125	9.54834e-36	1.16874e-31	1.34194	0.343	0.133	2.99035e-27
HAUS1	1.82963e-23	1.33927	7.15089e-28	1.40522	0.705	0.345	1.82963e-23	2.79771e-41	1.3462	0.782	0.389	7.15821e-37	1.79912e-51	1.33927	0.654	0.337	4.60324e-47
NCAPH	4.79115e-42	1.3374	1.87257e-46	1.79227	0.393	0.073	4.79115e-42	1.28452e-58	1.82097	0.458	0.101	3.28658e-54	1.54352e-55	1.3374	0.423	0.131	3.94925e-51
PCGF6	7.83566e-17	1.33692	3.06248e-21	1.36016	0.59	0.271	7.83566e-17	7.64664e-30	1.33692	0.618	0.29	1.95647e-25	2.23272e-53	1.36671	0.617	0.281	5.71265e-49
BUB1B	1.99953e-66	1.33084	7.81495e-71	1.85826	0.63	0.129	1.99953e-66	1.33896e-93	1.75338	0.71	0.164	3.42587e-89	1.0288e-93	1.33084	0.579	0.159	2.63229e-89
SH3BP1	2.95767e-10	1.31967	1.15597e-14	1.31967	0.434	0.199	2.95767e-10	3.10877e-30	1.55691	0.471	0.178	7.9541e-26	3.58847e-30	1.3437	0.371	0.158	9.18146e-26
KIF15	9.92837e-28	1.31788	3.88039e-32	1.47391	0.364	0.086	9.92837e-28	4.93396e-48	1.39865	0.433	0.103	1.2624e-43	4.50107e-64	1.31788	0.432	0.122	1.15164e-59
SAMD1	2.34746e-28	1.31222	9.17479e-33	1.48255	0.763	0.378	2.34746e-28	1.41323e-43	1.53354	0.731	0.342	3.61588e-39	1.73125e-39	1.31222	0.568	0.29	4.42958e-35
OAS3	2.48533e-14	1.3104	9.71364e-19	1.40462	0.457	0.189	2.48533e-14	1.25011e-31	1.54305	0.546	0.232	3.19852e-27	1.42183e-48	1.3104	0.542	0.232	3.63789e-44
SPATA33	6.74123e-19	1.3064	1.05633e-30	1.54179	0.636	0.256	2.70273e-26	2.63473e-23	1.3064	0.529	0.251	6.74123e-19	9.83602e-38	1.31251	0.486	0.219	2.51664e-33
FOXRED2	5.05041e-14	1.30315	9.52876e-22	1.50786	0.393	0.13	2.43803e-17	1.9739e-18	1.30315	0.387	0.167	5.05041e-14	1.34321e-23	1.38321	0.301	0.129	3.43674e-19
DCLRE1A	1.04932e-10	1.30109	1.31985e-21	1.59229	0.41	0.145	3.37696e-17	4.10113e-15	1.30109	0.353	0.16	1.04932e-10	4.31044e-25	1.33018	0.311	0.13	1.10287e-20
GALNT18	1.12917e-16	1.29664	4.41323e-21	1.52825	0.497	0.206	1.12917e-16	1.60026e-31	1.56116	0.563	0.242	4.09443e-27	2.84478e-46	1.29664	0.57	0.257	7.27866e-42
NSD2	3.32122e-51	1.29412	1.29806e-55	1.44258	0.983	0.827	3.32122e-51	1.64542e-69	1.29789	0.996	0.839	4.20998e-65	7.20074e-122	1.29412	0.986	0.844	1.84238e-117
ZMYND19	2.17181e-15	1.2881	8.48826e-20	1.31311	0.561	0.265	2.17181e-15	4.87742e-31	1.4192	0.58	0.253	1.24794e-26	3.17107e-27	1.2881	0.4	0.192	8.1135e-23
PARP2	8.24287e-19	1.28764	1.36171e-25	1.67519	0.486	0.179	3.48406e-21	3.22163e-23	1.28764	0.466	0.196	8.24287e-19	6.59464e-37	1.3618	0.442	0.188	1.6873e-32
PRPS2	3.15637e-23	1.28754	1.23363e-27	1.36781	0.763	0.446	3.15637e-23	2.70086e-34	1.28754	0.777	0.446	6.91043e-30	4.53134e-57	1.31958	0.731	0.394	1.15939e-52
TOP3A	2.38556e-23	1.28615	9.32369e-28	1.34267	0.723	0.368	2.38556e-23	1.07721e-31	1.28615	0.697	0.357	2.75615e-27	1.96662e-65	1.46952	0.689	0.334	5.03179e-61
OSBPL6	3.74427e-11	1.27714	1.46341e-15	1.27714	0.422	0.18	3.74427e-11	1.13294e-21	1.36485	0.5	0.236	2.89875e-17	5.01956e-48	1.37838	0.598	0.281	1.2843e-43
RPA1	5.24809e-33	1.27525	2.05116e-37	1.38685	0.873	0.513	5.24809e-33	1.97102e-43	1.27525	0.87	0.521	5.04304e-39	2.89657e-77	1.41288	0.834	0.462	7.41115e-73
FBF1	3.55043e-10	1.27144	1.38765e-14	1.49319	0.324	0.123	3.55043e-10	4.27225e-18	1.43716	0.353	0.147	1.0931e-13	1.17049e-19	1.27144	0.28	0.126	2.99482e-15
LINC01237	2.16374e-12	1.27104	8.45673e-17	1.57999	0.329	0.117	2.16374e-12	2.35881e-29	1.73282	0.361	0.113	6.03525e-25	1.52349e-27	1.27104	0.376	0.169	3.898e-23
CCDC18	4.86327e-26	1.26871	1.90075e-30	1.31904	0.763	0.379	4.86327e-26	1.62902e-46	1.45383	0.777	0.383	4.16802e-42	5.30577e-65	1.26871	0.745	0.373	1.35753e-60
SPIN4	4.34092e-11	1.26763	1.6966e-15	1.41267	0.376	0.151	4.34092e-11	6.91715e-28	1.60113	0.387	0.13	1.76982e-23	2.23642e-19	1.26763	0.255	0.109	5.72211e-15
OIP5	2.22717e-17	1.26575	8.70464e-22	1.45589	0.41	0.141	2.22717e-17	1.32697e-22	1.28936	0.42	0.167	3.39518e-18	8.09548e-32	1.26575	0.367	0.147	2.07131e-27
CENPO	1.4549e-14	1.2604	5.6863e-19	1.41972	0.543	0.256	1.4549e-14	2.14866e-40	1.51834	0.647	0.267	5.49755e-36	1.36437e-42	1.2604	0.568	0.276	3.49087e-38
NCS1	7.97338e-11	1.25724	3.11631e-15	1.51305	0.301	0.105	7.97338e-11	7.92178e-28	1.79975	0.353	0.114	2.02687e-23	7.35281e-21	1.25724	0.285	0.124	1.88129e-16
EFCAB11	2.12172e-16	1.25496	8.29252e-21	1.25496	0.549	0.236	2.12172e-16	1.85607e-26	1.29009	0.542	0.237	4.74894e-22	2.43638e-53	1.33641	0.572	0.231	6.23372e-49
AP002495.1	1.3721e-15	1.25437	5.36269e-20	1.25437	0.584	0.273	1.3721e-15	2.42471e-29	1.34611	0.588	0.268	6.20385e-25	1.33283e-55	1.53416	0.568	0.24	3.41017e-51
PXMP2	1.08118e-17	1.24891	4.22566e-22	1.24891	0.653	0.318	1.08118e-17	1.05211e-29	1.27046	0.643	0.317	2.69193e-25	2.75966e-51	1.48234	0.563	0.244	7.06086e-47
CHEK2	6.99369e-13	1.24696	2.73341e-17	1.26293	0.514	0.241	6.99369e-13	1.86837e-32	1.36723	0.597	0.255	4.7804e-28	5.56525e-38	1.24696	0.484	0.215	1.42393e-33
MCMBP	1.54238e-28	1.2438	6.0282e-33	1.2438	0.861	0.588	1.54238e-28	1.44673e-46	1.28255	0.891	0.575	3.70161e-42	1.291e-80	1.2881	0.879	0.532	3.30316e-76
MTHFD1	3.46882e-30	1.23779	1.35575e-34	1.26119	0.919	0.609	3.46882e-30	1.30074e-46	1.23779	0.912	0.647	3.32807e-42	5.69076e-75	1.2553	0.879	0.592	1.45604e-70
TIPIN	3.02798e-17	1.23761	1.18345e-21	1.23761	0.618	0.286	3.02798e-17	7.11496e-35	1.34036	0.664	0.296	1.82043e-30	2.72714e-38	1.25974	0.551	0.275	6.97766e-34
SMYD4	2.6199e-15	1.2374	1.02396e-19	1.32824	0.526	0.233	2.6199e-15	1.17911e-20	1.2374	0.5	0.242	3.01687e-16	6.05089e-46	1.51118	0.512	0.222	1.54818e-41
RAD51C	4.61881e-26	1.23545	1.80521e-30	1.51768	0.671	0.296	4.61881e-26	1.40696e-35	1.38784	0.681	0.322	3.59984e-31	4.51659e-44	1.23545	0.598	0.29	1.15561e-39
NCAPH2	4.53783e-06	1.23514	4.03149e-16	1.61879	0.312	0.11	1.0315e-11	1.77356e-10	1.23514	0.256	0.117	4.53783e-06	1.39106e-21	1.36025	0.252	0.101	3.55917e-17
CHRNA5	2.54134e-18	1.23429	9.93255e-23	1.40273	0.584	0.264	2.54134e-18	4.33075e-29	1.34053	0.584	0.267	1.10807e-24	1.6841e-37	1.23429	0.502	0.233	4.30895e-33
PRTFDC1	2.76069e-16	1.23285	1.07898e-20	1.26964	0.642	0.321	2.76069e-16	5.19041e-30	1.33811	0.685	0.364	1.32802e-25	6.55364e-35	1.23285	0.645	0.394	1.67681e-30
ALG10	7.19498e-11	1.22315	2.81208e-15	1.37883	0.364	0.143	7.19498e-11	7.16468e-21	1.41562	0.361	0.138	1.83315e-16	4.52e-17	1.22315	0.266	0.124	1.15649e-12
RPA2	9.39364e-17	1.22231	3.6714e-21	1.22231	0.723	0.433	9.39364e-17	2.2227e-38	1.27674	0.79	0.427	5.687e-34	9.42966e-53	1.24193	0.689	0.374	2.41267e-48
KHK	1.3779e-16	1.22022	5.38538e-21	1.44028	0.462	0.178	1.3779e-16	1.53536e-36	1.58781	0.508	0.179	3.92838e-32	2.02994e-34	1.22022	0.484	0.229	5.1938e-30
FABP5	9.46317e-31	1.21683	3.69858e-35	1.57628	0.786	0.402	9.46317e-31	3.92819e-54	1.44071	0.891	0.512	1.00507e-49	6.41248e-47	1.21683	0.71	0.414	1.6407e-42
NUP107	4.61494e-36	1.21357	1.8037e-40	1.21357	0.948	0.69	4.61494e-36	5.30632e-53	1.25734	0.95	0.676	1.35767e-48	2.29703e-90	1.2547	0.946	0.683	5.87719e-86
GGCT	2.00955e-48	1.21336	7.85412e-53	1.49034	0.965	0.69	2.00955e-48	3.77755e-68	1.39655	0.975	0.718	9.66524e-64	3.23139e-78	1.21336	0.914	0.638	8.26783e-74
LIN54	1.14775e-21	1.20412	4.48586e-26	1.31026	0.769	0.416	1.14775e-21	1.50425e-36	1.20412	0.794	0.419	3.84877e-32	2.60775e-66	1.35282	0.769	0.399	6.6722e-62
ARL6IP6	2.40259e-21	1.1969	9.39027e-26	1.1969	0.838	0.542	2.40259e-21	3.17371e-47	1.33888	0.882	0.498	8.12026e-43	3.95685e-92	1.40228	0.911	0.589	1.0124e-87
SGO1	1.10218e-40	1.19377	7.23527e-55	2.02498	0.428	0.074	1.85122e-50	4.59404e-56	1.65266	0.454	0.1	1.17543e-51	4.30774e-45	1.19377	0.346	0.104	1.10218e-40
TCOF1	1.09586e-24	1.18917	4.28303e-29	1.32942	0.769	0.383	1.09586e-24	5.86293e-34	1.345	0.723	0.387	1.50009e-29	1.10678e-52	1.18917	0.722	0.383	2.83182e-48
AC011043.1	5.49866e-11	1.1868	4.69266e-21	1.33305	0.538	0.229	1.20066e-16	2.14909e-15	1.1868	0.412	0.203	5.49866e-11	6.17964e-48	1.52007	0.467	0.181	1.58112e-43
TIFA	1.11864e-10	1.18179	4.37209e-15	1.2811	0.434	0.191	1.11864e-10	1.32061e-23	1.42668	0.441	0.184	3.3789e-19	7.30188e-22	1.18179	0.332	0.154	1.86826e-17
IRX3	2.65437e-07	1.17887	1.03743e-11	1.17887	0.376	0.173	2.65437e-07	6.07523e-18	1.43716	0.357	0.15	1.55441e-13	7.38668e-16	1.22828	0.255	0.12	1.88996e-11
CDK1	2.21563e-64	1.17016	8.65952e-69	1.75169	0.584	0.115	2.21563e-64	2.69227e-96	1.63238	0.605	0.112	6.88845e-92	1.06417e-86	1.17016	0.47	0.111	2.72279e-82
HAUS6	2.11622e-27	1.16591	8.27103e-32	1.31159	0.821	0.465	2.11622e-27	2.7227e-35	1.16591	0.836	0.519	6.96631e-31	1.67613e-66	1.3086	0.778	0.412	4.28856e-62
CDCA7L	2.14956e-22	1.16209	8.4013e-27	1.16209	0.803	0.468	2.14956e-22	1.78977e-33	1.16601	0.79	0.476	4.57932e-29	3.23311e-58	1.27392	0.764	0.432	8.27223e-54
WDR34	3.21606e-17	1.16049	1.25696e-21	1.16049	0.74	0.427	3.21606e-17	4.15613e-33	1.21879	0.773	0.432	1.06339e-28	4.94087e-53	1.23693	0.717	0.388	1.26417e-48
RAI14	2.8281e-25	1.15783	1.10533e-29	1.34379	0.769	0.378	2.8281e-25	2.04641e-31	1.30917	0.744	0.414	5.23595e-27	2.33493e-43	1.15783	0.717	0.432	5.97415e-39
LRRCC1	1.99908e-08	1.15488	7.81316e-13	1.15488	0.451	0.222	1.99908e-08	1.05444e-31	1.32598	0.609	0.266	2.69789e-27	4.83726e-34	1.18335	0.498	0.239	1.23766e-29
PRELID3A	1.28572e-07	1.15434	5.02509e-12	1.37883	0.318	0.134	1.28572e-07	2.40321e-16	1.42874	0.328	0.137	6.14884e-12	3.79809e-17	1.15434	0.259	0.118	9.7178e-13
RTKN2	1.04555e-11	1.13256	4.08642e-16	1.13256	0.37	0.14	1.04555e-11	2.0243e-33	1.49996	0.462	0.155	5.17937e-29	2.3794e-43	1.19066	0.43	0.158	6.08794e-39
HPRT1	3.38939e-35	1.13085	1.32471e-39	1.19584	0.96	0.687	3.38939e-35	1.94656e-40	1.17568	0.945	0.699	4.98047e-36	1.3263e-73	1.13085	0.928	0.702	3.39347e-69
PAK6	1.40355e-06	1.13042	5.48563e-11	1.18805	0.335	0.15	1.40355e-06	3.46105e-13	1.13042	0.361	0.176	8.85544e-09	4.66415e-26	1.307	0.329	0.139	1.19337e-21
PGP	3.64508e-25	1.13019	1.42464e-29	1.19261	0.873	0.582	3.64508e-25	2.96904e-41	1.16054	0.895	0.609	7.5966e-37	1.67769e-59	1.13019	0.834	0.549	4.29254e-55
CLN6	4.77474e-18	1.12788	1.86615e-22	1.19919	0.746	0.416	4.77474e-18	6.41944e-33	1.12788	0.811	0.463	1.64248e-28	3.52269e-51	1.13364	0.755	0.434	9.01316e-47
FBXO4	8.74994e-10	1.12719	3.41981e-14	1.18612	0.434	0.197	8.74994e-10	2.85814e-23	1.25368	0.5	0.221	7.31284e-19	9.13239e-26	1.12719	0.416	0.202	2.33661e-21
ADCY3	1.70806e-31	1.12707	6.67577e-36	1.38771	0.867	0.488	1.70806e-31	1.44483e-54	1.38709	0.903	0.541	3.69674e-50	1.10299e-62	1.12707	0.893	0.623	2.82211e-58
NXT1	3.76213e-11	1.12084	1.47039e-15	1.12084	0.601	0.321	3.76213e-11	5.51086e-27	1.28726	0.643	0.339	1.41001e-22	1.07696e-36	1.12611	0.605	0.333	2.75551e-32
RNF157	2.95953e-13	1.12069	1.1567e-17	1.18479	0.734	0.47	2.95953e-13	3.5186e-28	1.12069	0.811	0.514	9.0027e-24	4.09636e-45	1.14536	0.78	0.492	1.0481e-40
OXCT1	2.88542e-22	1.11337	1.12774e-26	1.29088	0.757	0.391	2.88542e-22	1.69488e-28	1.11337	0.782	0.471	4.33651e-24	4.29648e-70	1.47826	0.745	0.363	1.0993e-65
NUDT1	1.0089e-16	1.11302	1.70524e-25	1.41983	0.555	0.221	4.36301e-21	3.94316e-21	1.11302	0.529	0.253	1.0089e-16	3.22388e-31	1.11902	0.491	0.242	8.24862e-27
SLC27A2	3.4972e-24	1.10891	1.36684e-28	1.31698	0.792	0.458	3.4972e-24	7.67328e-42	1.28972	0.857	0.496	1.96329e-37	2.61628e-43	1.10891	0.727	0.439	6.69402e-39
NEIL3	7.76389e-18	1.10802	3.03443e-22	1.74321	0.272	0.069	7.76389e-18	4.82954e-28	1.40262	0.298	0.081	1.23569e-23	1.65926e-27	1.10802	0.257	0.088	4.24539e-23
PARPBP	5.59212e-31	1.10763	2.18562e-35	1.35867	0.803	0.379	5.59212e-31	2.28253e-41	1.30378	0.769	0.399	5.84008e-37	2.53738e-51	1.10763	0.72	0.387	6.49214e-47
GEN1	7.81727e-18	1.1061	3.05529e-22	1.22448	0.775	0.464	7.81727e-18	1.00435e-29	1.1061	0.786	0.495	2.56973e-25	6.38197e-64	1.24811	0.839	0.513	1.63289e-59
NUP210	3.83048e-21	1.10504	1.4971e-25	1.10504	0.861	0.59	3.83048e-21	5.07853e-42	1.23742	0.887	0.6	1.29939e-37	2.62415e-91	1.31761	0.928	0.603	6.71415e-87
TFDP1	9.68862e-41	1.10451	3.78669e-45	1.27498	0.965	0.773	9.68862e-41	1.15236e-47	1.10451	0.971	0.775	2.94843e-43	7.5096e-79	1.12903	0.949	0.728	1.92141e-74
TTF2	2.75969e-26	1.10375	1.07859e-30	1.34932	0.809	0.479	2.75969e-26	2.41828e-34	1.18064	0.828	0.488	6.1874e-30	6.53877e-46	1.10375	0.75	0.46	1.67301e-41
ADGRG5	4.55561e-07	1.10122	1.78051e-11	1.10122	0.422	0.21	4.55561e-07	5.16912e-28	1.44557	0.466	0.179	1.32257e-23	5.14301e-34	1.26202	0.467	0.214	1.31589e-29
S100PBP	1.7437e-18	1.10097	9.08706e-27	1.24861	0.792	0.444	2.32502e-22	6.81505e-23	1.10097	0.697	0.424	1.7437e-18	1.32673e-54	1.15967	0.752	0.41	3.39457e-50
CENPN	1.11581e-11	1.09632	4.36101e-16	1.09632	0.434	0.181	1.11581e-11	8.05838e-22	1.15441	0.475	0.205	2.06182e-17	3.76131e-32	1.21138	0.409	0.175	9.6237e-28
POLR3K	1.13007e-14	1.09329	4.41676e-19	1.09329	0.711	0.421	1.13007e-14	2.79398e-40	1.28884	0.811	0.44	7.14869e-36	2.64907e-36	1.16517	0.605	0.342	6.77792e-32
SCN1A-AS1	2.31335e-15	1.09252	3.71898e-24	1.39037	0.618	0.271	9.51539e-20	9.04146e-20	1.09252	0.576	0.301	2.31335e-15	4.71531e-35	1.11766	0.575	0.297	1.20646e-30
CIT	1.59254e-47	1.09215	6.22426e-52	1.61602	0.775	0.298	1.59254e-47	3.48037e-71	1.49429	0.79	0.292	8.90487e-67	6.85183e-91	1.09215	0.71	0.256	1.75311e-86
FN3KRP	1.94454e-12	1.09212	7.60003e-17	1.09212	0.624	0.333	1.94454e-12	1.19241e-23	1.14588	0.622	0.33	3.05089e-19	8.75757e-39	1.2136	0.561	0.276	2.24071e-34
SUV39H2	3.19969e-11	1.09086	2.59418e-19	1.3603	0.526	0.237	6.63747e-15	1.25056e-15	1.09086	0.466	0.241	3.19969e-11	9.127e-39	1.31693	0.481	0.213	2.33523e-34
SPC25	8.6279e-11	1.08992	3.37212e-15	1.34633	0.376	0.156	8.6279e-11	1.02328e-27	1.2087	0.433	0.157	2.61815e-23	1.89045e-33	1.08992	0.409	0.173	4.83691e-29
CEP78	1.98159e-23	1.08772	7.74484e-28	1.15695	0.873	0.558	1.98159e-23	5.55873e-50	1.24149	0.958	0.569	1.42226e-45	2.5421e-63	1.08772	0.883	0.579	6.50421e-59
PRIMPOL	6.77217e-20	1.08525	2.64683e-24	1.08525	0.792	0.415	6.77217e-20	1.89205e-35	1.33723	0.744	0.391	4.841e-31	7.96877e-58	1.32335	0.727	0.387	2.03889e-53
HIRIP3	2.47958e-08	1.08396	9.69116e-13	1.08396	0.41	0.187	2.47958e-08	2.99932e-25	1.23892	0.508	0.216	7.67407e-21	8.79212e-17	1.08869	0.332	0.173	2.24955e-12
SFI1	4.40561e-15	1.08239	1.72188e-19	1.08239	0.74	0.471	4.40561e-15	5.74176e-30	1.14717	0.782	0.479	1.46909e-25	1.59462e-56	1.23549	0.778	0.464	4.08e-52
RIF1	3.51356e-46	1.08137	1.37323e-50	1.24728	0.983	0.879	3.51356e-46	1.40142e-69	1.19019	0.996	0.885	3.58566e-65	7.53353e-138	1.08137	1	0.953	1.92753e-133
RPA3	9.32782e-15	1.07904	3.64567e-19	1.07904	0.746	0.477	9.32782e-15	1.01799e-31	1.08584	0.807	0.486	2.60462e-27	1.95458e-41	1.13506	0.701	0.431	5.001e-37
CGAS	1.34017e-14	1.07707	5.2379e-19	1.25442	0.607	0.311	1.34017e-14	2.14805e-22	1.07707	0.609	0.316	5.496e-18	1.05729e-30	1.14876	0.561	0.312	2.70518e-26
ITPKA	6.74944e-11	1.07502	2.63794e-15	1.17245	0.439	0.191	6.74944e-11	1.554e-21	1.24846	0.424	0.175	3.97607e-17	1.36559e-18	1.07502	0.264	0.115	3.49399e-14
RAB27A	2.6909e-12	1.07485	3.5296e-18	1.12231	0.538	0.237	9.03085e-14	1.05171e-16	1.07485	0.458	0.224	2.6909e-12	2.87105e-30	1.14347	0.456	0.216	7.34587e-26
FANCC	5.69331e-28	1.07361	2.22517e-32	1.25733	0.908	0.589	5.69331e-28	6.31649e-41	1.23589	0.916	0.604	1.61614e-36	3.33178e-61	1.07361	0.918	0.614	8.52469e-57
SACS	1.32292e-10	1.07304	5.17048e-15	1.18968	0.497	0.238	1.32292e-10	3.34381e-27	1.27522	0.588	0.277	8.55548e-23	2.8322e-27	1.07304	0.521	0.29	7.24648e-23
RUSC1	4.32234e-09	1.07297	1.68934e-13	1.07953	0.526	0.279	4.32234e-09	2.61027e-31	1.36963	0.592	0.263	6.67864e-27	7.84761e-21	1.07297	0.376	0.19	2.00789e-16
UBL7-AS1	1.31611e-05	1.0692	5.14386e-10	1.0974	0.364	0.178	1.31611e-05	5.42353e-14	1.16901	0.37	0.178	1.38766e-09	9.36723e-18	1.0692	0.322	0.161	2.3967e-13
KIF22	1.13758e-19	1.06523	4.44609e-24	1.33639	0.543	0.214	1.13758e-19	2.52689e-31	1.26715	0.559	0.224	6.46529e-27	5.8111e-33	1.06523	0.456	0.202	1.48683e-28
CCDC138	2.12202e-20	1.0642	8.29366e-25	1.12124	0.896	0.64	2.12202e-20	2.30293e-33	1.07525	0.92	0.645	5.89227e-29	4.77314e-75	1.0642	0.977	0.769	1.22125e-70
SAC3D1	1.39438e-11	1.06284	1.24155e-20	1.29156	0.566	0.256	3.17663e-16	5.44978e-16	1.06284	0.492	0.263	1.39438e-11	3.34145e-24	1.08597	0.442	0.233	8.54943e-20
MDC1	2.07628e-12	1.06196	8.1149e-17	1.22416	0.509	0.234	2.07628e-12	1.29061e-20	1.18077	0.513	0.245	3.30217e-16	4.741e-33	1.06196	0.5	0.24	1.21303e-28
LRRC20	1.94826e-07	1.06119	7.61456e-12	1.29785	0.335	0.144	1.94826e-07	2.51598e-15	1.26402	0.357	0.161	6.43739e-11	1.79265e-14	1.06119	0.273	0.139	4.58668e-10
CASP2	2.05849e-14	1.05896	8.04539e-19	1.0893	0.74	0.454	2.05849e-14	9.61651e-27	1.05896	0.761	0.452	2.46048e-22	1.28678e-47	1.08723	0.752	0.434	3.29236e-43
MEX3D	7.58442e-10	1.05855	9.77665e-17	1.22433	0.491	0.22	2.50145e-12	2.96429e-14	1.1126	0.378	0.181	7.58442e-10	1.91412e-14	1.05855	0.271	0.137	4.89747e-10
ATAD3A	8.16162e-13	1.05091	3.58693e-27	1.48162	0.601	0.253	9.17751e-23	2.97174e-21	1.17959	0.55	0.277	7.60349e-17	3.18988e-17	1.05091	0.4	0.233	8.16162e-13
CKS1B	8.85003e-33	1.05012	3.45893e-37	1.21701	0.902	0.611	8.85003e-33	9.48626e-42	1.13248	0.887	0.605	2.42715e-37	3.73847e-58	1.05012	0.825	0.54	9.56526e-54
NOD1	5.17389e-13	1.04923	1.05918e-20	1.33172	0.59	0.265	2.71001e-16	2.02216e-17	1.04923	0.521	0.27	5.17389e-13	2.91463e-50	1.33364	0.589	0.263	7.45738e-46
NUP155	4.47141e-18	1.044	1.7476e-22	1.13407	0.78	0.47	4.47141e-18	1.6127e-29	1.044	0.811	0.488	4.12625e-25	3.33017e-51	1.08495	0.79	0.458	8.52057e-47
C19orf48	2.71242e-27	1.04178	1.06012e-31	1.36293	0.844	0.528	2.71242e-27	5.79e-32	1.04178	0.836	0.539	1.48143e-27	9.36985e-72	1.25454	0.846	0.492	2.39737e-67
SNX10	4.19518e-10	1.03599	1.63964e-14	1.03599	0.543	0.275	4.19518e-10	3.85432e-23	1.18708	0.597	0.303	9.86167e-19	9.77714e-43	1.35203	0.542	0.254	2.50158e-38
NUP93	7.15341e-16	1.03498	2.79583e-20	1.16736	0.699	0.391	7.15341e-16	3.97379e-25	1.03498	0.744	0.439	1.01673e-20	1.14031e-42	1.07045	0.708	0.411	2.91761e-38
KCNG3	1.13523e-10	1.03373	4.43692e-15	1.30138	0.439	0.196	1.13523e-10	1.48682e-17	1.20499	0.441	0.209	3.80419e-13	6.15653e-26	1.03373	0.449	0.225	1.57521e-21
ORC3	1.50548e-21	1.03218	5.88402e-26	1.12347	0.85	0.506	1.50548e-21	7.41429e-33	1.09267	0.861	0.571	1.89702e-28	1.3069e-49	1.03218	0.839	0.535	3.34383e-45
MARC1	1.60579e-13	1.02751	2.48598e-18	1.1643	0.618	0.327	6.36062e-14	6.27603e-18	1.02751	0.601	0.354	1.60579e-13	1.54938e-32	1.14914	0.533	0.28	3.96425e-28
AKR1E2	3.49217e-10	1.02592	1.36487e-14	1.02592	0.595	0.332	3.49217e-10	9.59102e-26	1.22466	0.639	0.326	2.45396e-21	2.93156e-35	1.07115	0.6	0.32	7.50068e-31
KLHL22	8.22498e-11	1.02572	3.21464e-15	1.20028	0.572	0.312	8.22498e-11	1.54168e-19	1.02572	0.613	0.336	3.94455e-15	6.95534e-32	1.09939	0.596	0.336	1.77959e-27
DCTPP1	5.53201e-29	1.02542	2.16212e-33	1.32615	0.884	0.577	5.53201e-29	7.33968e-34	1.11287	0.887	0.608	1.87793e-29	2.28852e-36	1.02542	0.736	0.506	5.85541e-32
LINC01572	1.97681e-26	1.02434	7.72613e-31	1.59291	0.671	0.284	1.97681e-26	3.56644e-42	1.39995	0.718	0.323	9.1251e-38	9.11938e-49	1.02434	0.745	0.414	2.33329e-44
LIN52	1.05839e-17	1.02298	6.50615e-40	1.55419	0.786	0.344	1.66466e-35	4.1366e-22	1.02298	0.706	0.414	1.05839e-17	1.21357e-59	1.27111	0.748	0.374	3.10503e-55
GMPS	5.34381e-27	1.01808	2.08857e-31	1.01808	0.954	0.814	5.34381e-27	6.2588e-48	1.07212	0.979	0.815	1.60138e-43	5.88661e-72	1.02791	0.967	0.796	1.50615e-67
FANCL	2.97444e-28	1.01781	1.16253e-32	1.01781	0.954	0.834	2.97444e-28	3.11138e-48	1.14517	0.962	0.815	7.96078e-44	3.25033e-111	1.12662	0.984	0.867	8.31629e-107
TELO2	1.61134e-09	1.01743	5.29618e-28	1.5802	0.532	0.193	1.35508e-23	6.29772e-14	1.01743	0.399	0.195	1.61134e-09	3.92968e-22	1.20228	0.355	0.172	1.00545e-17
DEGS1	6.28239e-14	1.01632	2.4554e-18	1.15108	0.607	0.305	6.28239e-14	2.6651e-21	1.09814	0.605	0.319	6.81893e-17	6.23924e-23	1.01632	0.509	0.299	1.59637e-18
NUP205	5.49706e-17	1.01555	2.14847e-21	1.17407	0.775	0.472	5.49706e-17	2.55896e-25	1.06834	0.752	0.482	6.54735e-21	1.05901e-44	1.01555	0.773	0.474	2.70959e-40
MTFP1	1.13397e-17	1.01537	9.15114e-23	1.15228	0.717	0.367	2.34141e-18	4.34407e-29	1.31487	0.655	0.348	1.11147e-24	4.43199e-22	1.01537	0.449	0.245	1.13397e-17
FAR2	2.13402e-12	1.01481	8.34057e-17	1.01481	0.786	0.553	2.13402e-12	3.64408e-30	1.12124	0.861	0.555	9.32375e-26	4.01975e-30	1.04737	0.671	0.429	1.02849e-25
PARD6G	0.00112595	1.00991	4.40066e-08	1.00991	0.312	0.156	0.00112595	1.00854e-09	1.01497	0.319	0.167	2.58044e-05	1.71097e-18	1.21671	0.262	0.116	4.37769e-14
ATRIP	5.70904e-05	1.00683	2.23131e-09	1.11586	0.318	0.149	5.70904e-05	3.31015e-11	1.00683	0.328	0.161	8.46936e-07	1.39253e-19	1.17293	0.287	0.129	3.56293e-15
WEE1	1.33435e-26	1.00534	2.40673e-32	1.28685	0.832	0.426	6.15785e-28	5.21516e-31	1.07956	0.811	0.449	1.33435e-26	4.51848e-58	1.00534	0.874	0.525	1.1561e-53
SMC1A	1.67069e-27	1.00399	6.52972e-32	1.13702	0.913	0.716	1.67069e-27	1.2448e-43	1.03487	0.95	0.732	3.18494e-39	3.00006e-64	1.00399	0.928	0.703	7.67596e-60
MLH1	8.59808e-11	1.00298	3.36046e-15	1.01474	0.636	0.354	8.59808e-11	1.05945e-24	1.13842	0.668	0.37	2.71071e-20	6.6315e-33	1.00298	0.633	0.364	1.69674e-28
CENPS	1.47716e-08	0.998151	2.46026e-15	1.2167	0.497	0.235	6.29481e-11	5.77331e-13	1.03391	0.462	0.266	1.47716e-08	2.71178e-22	0.998151	0.428	0.224	6.93837e-18
SLC1A4	5.08929e-13	0.996634	1.98909e-17	1.16095	0.601	0.3	5.08929e-13	1.97222e-29	1.16545	0.697	0.359	5.04612e-25	1.52815e-37	0.996634	0.734	0.465	3.90992e-33
ZNF620	3.46292e-08	0.995931	5.92663e-17	1.23498	0.497	0.224	1.51639e-12	1.35344e-12	0.995931	0.437	0.239	3.46292e-08	7.68212e-23	1.13337	0.432	0.232	1.96555e-18
B4GALT2	7.19548e-08	0.990646	4.39846e-13	1.10267	0.468	0.233	1.12539e-08	2.81227e-12	0.990646	0.429	0.233	7.19548e-08	2.3439e-20	1.14448	0.371	0.193	5.99711e-16
ST6GAL1	6.84125e-10	0.990397	2.67382e-14	1.10702	0.497	0.243	6.84125e-10	1.65765e-16	1.12618	0.5	0.266	4.24127e-12	2.51765e-29	0.990397	0.53	0.272	6.44165e-25
ZRANB3	9.25027e-13	0.990355	3.61536e-17	1.06562	0.792	0.565	9.25027e-13	4.01299e-25	0.990355	0.849	0.611	1.02676e-20	2.26713e-63	1.12345	0.914	0.704	5.80068e-59
BRI3BP	7.96298e-41	0.988106	3.11224e-45	1.04511	1	0.922	7.96298e-41	1.74098e-59	1.01114	1	0.916	4.45446e-55	1.71842e-81	0.988106	0.984	0.876	4.39676e-77
CENPW	3.67724e-21	0.987942	1.43721e-25	1.39812	0.416	0.126	3.67724e-21	1.37137e-30	1.08936	0.492	0.172	3.50879e-26	8.91949e-30	0.987942	0.393	0.165	2.28214e-25
TMEM106C	1.20759e-19	0.986917	4.71972e-24	0.986917	0.925	0.765	1.20759e-19	3.09333e-42	1.04509	0.95	0.782	7.9146e-38	9.6969e-57	0.993098	0.925	0.746	2.48105e-52
MNS1	1.2083e-10	0.985684	4.72252e-15	1.01465	0.607	0.332	1.2083e-10	4.66427e-23	1.00201	0.651	0.337	1.1934e-18	1.25086e-31	0.985684	0.61	0.34	3.20044e-27
BUD13	3.21154e-05	0.983941	1.25519e-09	0.983941	0.405	0.21	3.21154e-05	5.73887e-14	1.01984	0.408	0.2	1.46835e-09	1.19301e-19	1.14206	0.334	0.164	3.05244e-15
MESP1	6.59968e-05	0.98247	2.57941e-09	0.999021	0.353	0.173	6.59968e-05	5.99647e-20	1.26074	0.445	0.199	1.53426e-15	2.17493e-17	0.98247	0.35	0.183	5.56477e-13
AL359636.2	0.00093272	0.979869	3.64543e-08	0.99153	0.347	0.181	0.00093272	5.72959e-09	0.979869	0.307	0.163	0.000146597	9.23014e-36	1.25388	0.472	0.214	2.36162e-31
ANLN	2.15833e-32	0.979299	8.43559e-37	1.27162	0.694	0.281	2.15833e-32	9.44198e-61	1.20572	0.773	0.293	2.41583e-56	5.44393e-76	0.979299	0.752	0.326	1.39288e-71
RFC1	1.65112e-24	0.974554	6.4532e-29	0.974554	0.936	0.796	1.65112e-24	4.27668e-50	1.08425	0.966	0.798	1.09423e-45	1.52525e-76	1.05539	0.963	0.746	3.90251e-72
FBXO5	7.36445e-09	0.971436	2.87831e-13	1.20224	0.434	0.206	7.36445e-09	2.43051e-14	0.971436	0.412	0.203	6.2187e-10	4.70365e-19	1.00028	0.404	0.22	1.20348e-14
SMC6	7.26496e-26	0.970736	2.83943e-30	1.04444	0.925	0.745	7.26496e-26	2.34026e-43	1.11895	0.958	0.771	5.98779e-39	2.20336e-69	0.970736	0.965	0.809	5.63752e-65
CTPS1	2.5109e-22	0.970021	9.81356e-27	1.2622	0.803	0.492	2.5109e-22	1.43675e-30	1.00155	0.882	0.579	3.67607e-26	4.14573e-40	0.970021	0.801	0.567	1.06073e-35
TMEM160	2.22115e-18	0.96937	2.61052e-23	1.20592	0.763	0.458	6.67927e-19	8.6811e-23	0.970892	0.777	0.486	2.22115e-18	9.39082e-27	0.96937	0.591	0.369	2.40274e-22
KIFC1	3.84217e-34	0.967729	1.92881e-39	1.7203	0.376	0.077	4.93506e-35	4.89433e-45	1.3924	0.399	0.094	1.25226e-40	1.50167e-38	0.967729	0.327	0.103	3.84217e-34
SNRNP25	1.70198e-10	0.967615	1.29488e-24	1.33808	0.647	0.297	3.31309e-20	6.65202e-15	0.967615	0.576	0.346	1.70198e-10	1.68183e-22	1.03024	0.47	0.261	4.30312e-18
NAV2	2.38037e-06	0.966522	9.3034e-11	0.966522	0.399	0.198	2.38037e-06	6.5927e-15	1.15722	0.374	0.175	1.68681e-10	2.51861e-34	1.32848	0.472	0.218	6.44411e-30
TMEM237	2.685e-06	0.966419	1.0494e-10	0.966419	0.439	0.226	2.685e-06	2.45105e-17	1.14766	0.466	0.234	6.27126e-13	9.16316e-28	1.06346	0.514	0.281	2.34449e-23
CTNNAL1	1.39155e-28	0.964943	5.43872e-33	1.03652	0.988	0.808	1.39155e-28	6.28695e-43	1.05063	0.966	0.78	1.60858e-38	4.65856e-67	0.964943	0.967	0.767	1.19194e-62
PRKDC	5.64936e-70	0.962004	2.20799e-74	1.2488	1	0.955	5.64936e-70	1.42903e-82	1.03164	1	0.976	3.65632e-78	2.05062e-132	0.962004	1	0.982	5.24671e-128
TTI1	6.43419e-16	0.961258	1.35081e-23	1.10921	0.775	0.441	3.45619e-19	2.51473e-20	0.961258	0.731	0.462	6.43419e-16	8.98227e-52	1.1099	0.778	0.472	2.2982e-47
ARHGAP11B	5.96965e-21	0.960018	2.33317e-25	1.49582	0.376	0.107	5.96965e-21	2.13066e-39	1.58319	0.403	0.109	5.45151e-35	9.22519e-27	0.960018	0.311	0.121	2.36036e-22
PSIP1	1.24286e-40	0.959055	4.85759e-45	1.20043	0.988	0.761	1.24286e-40	1.01609e-49	1.06008	0.962	0.775	2.59976e-45	5.15283e-65	0.959055	0.97	0.782	1.3184e-60
IMPA2	7.33056e-14	0.957487	6.37459e-20	1.10529	0.699	0.396	1.631e-15	2.86507e-18	0.957487	0.647	0.39	7.33056e-14	3.71186e-33	1.11217	0.591	0.338	9.49716e-29
DGCR8	1.42861e-08	0.956887	5.58355e-13	0.956887	0.618	0.357	1.42861e-08	4.65819e-20	1.05529	0.618	0.341	1.19184e-15	1.44398e-31	1.05512	0.593	0.334	3.69456e-27
DCK	2.42157e-07	0.953934	9.46443e-12	1.08527	0.445	0.225	2.42157e-07	5.74878e-16	1.04671	0.458	0.227	1.47088e-11	4.12033e-12	0.953934	0.292	0.163	1.05423e-07
NDC1	1.02008e-15	0.951733	3.98688e-20	1.05079	0.763	0.446	1.02008e-15	4.51065e-21	0.951733	0.752	0.473	1.1541e-16	5.18536e-40	1.0258	0.717	0.422	1.32673e-35
NIBAN1	7.16436e-08	0.951232	2.80011e-12	1.25809	0.324	0.135	7.16436e-08	1.30541e-19	1.0845	0.475	0.22	3.34002e-15	3.44827e-23	0.951232	0.502	0.285	8.82274e-19
NCAPG	1.01871e-28	0.950814	2.15753e-33	1.54808	0.353	0.078	5.52025e-29	4.25443e-53	1.51516	0.45	0.103	1.08854e-48	3.98153e-33	0.950814	0.313	0.106	1.01871e-28
NPHP4	3.02928e-11	0.947051	1.18396e-15	1.14835	0.543	0.274	3.02928e-11	3.78862e-16	0.947051	0.521	0.277	9.69356e-12	7.08322e-20	0.950823	0.446	0.252	1.81231e-15
NFIC	3.72968e-23	0.946282	1.4577e-27	1.17626	0.873	0.581	3.72968e-23	2.73651e-45	1.24353	0.924	0.593	7.00164e-41	8.55596e-41	0.946282	0.811	0.569	2.18913e-36
DEK	2.02603e-52	0.945548	7.91851e-57	1.00444	0.994	0.984	2.02603e-52	3.68948e-77	1.07459	1	0.975	9.4399e-73	2.34034e-111	0.945548	1	0.98	5.988e-107
SLC19A1	6.383e-05	0.940173	2.49472e-09	1.03198	0.376	0.19	6.383e-05	1.70463e-13	1.02622	0.395	0.196	4.36147e-09	1.83891e-14	0.940173	0.332	0.184	4.70503e-10
GLB1L2	1.2405e-07	0.93922	4.84835e-12	0.99947	0.572	0.333	1.2405e-07	5.07754e-16	0.93922	0.567	0.326	1.29914e-11	1.87131e-23	1.0904	0.456	0.245	4.78795e-19
POLR1E	1.70723e-14	0.938647	2.11284e-19	1.20463	0.572	0.268	5.40592e-15	2.96164e-19	1.1119	0.55	0.286	7.57764e-15	6.67251e-19	0.938647	0.456	0.273	1.70723e-14
DEPDC1B	1.95145e-14	0.93824	7.62702e-19	1.1983	0.405	0.147	1.95145e-14	2.93846e-34	1.21452	0.466	0.15	7.51834e-30	6.53395e-41	0.93824	0.437	0.164	1.67178e-36
CCDC14	7.4655e-22	0.937766	2.91781e-26	0.990178	0.931	0.726	7.4655e-22	3.74451e-34	0.997565	0.912	0.7	9.5807e-30	5.99083e-52	0.937766	0.909	0.671	1.53281e-47
RANBP17	5.5451e-30	0.931441	2.16724e-34	1.05748	0.983	0.821	5.5451e-30	1.82805e-49	1.06768	0.996	0.866	4.67726e-45	1.84915e-70	0.931441	0.991	0.914	4.73125e-66
USP31	2.29752e-11	0.931239	7.80064e-21	1.43609	0.514	0.22	1.99587e-16	8.97961e-16	0.931239	0.521	0.283	2.29752e-11	1.60299e-45	1.33907	0.549	0.249	4.10141e-41
E2F3	1.16058e-15	0.930777	4.53601e-20	0.985667	0.844	0.615	1.16058e-15	3.48612e-28	0.930777	0.882	0.629	8.91959e-24	3.42635e-54	0.986541	0.909	0.618	8.76666e-50
PHTF2	5.09456e-13	0.92849	1.99115e-17	0.92849	0.798	0.53	5.09456e-13	3.36284e-24	0.983582	0.782	0.517	8.60417e-20	2.0027e-39	0.953574	0.769	0.473	5.12412e-35
TLCD4	6.60702e-10	0.928275	2.75312e-18	1.07059	0.659	0.335	7.04412e-14	2.58228e-14	0.928275	0.576	0.353	6.60702e-10	1.12207e-31	1.03203	0.607	0.348	2.87093e-27
GRHL1	0.000173759	0.928269	6.79119e-09	0.97393	0.324	0.154	0.000173759	7.20455e-10	0.928269	0.345	0.18	1.84336e-05	1.48241e-14	1.01492	0.318	0.172	3.7929e-10
CMSS1	1.97873e-27	0.926991	7.73362e-32	1.21154	0.931	0.713	1.97873e-27	6.59291e-45	1.07716	0.987	0.778	1.68686e-40	7.31669e-66	0.926991	0.979	0.834	1.87205e-61
SKP2	4.11841e-17	0.926512	1.60963e-21	1.06126	0.775	0.466	4.11841e-17	6.67281e-24	0.995251	0.777	0.479	1.70731e-19	3.15473e-31	0.926512	0.671	0.419	8.07169e-27
RADX	0.0349191	0.925824	1.36477e-06	0.925824	0.289	0.151	0.0349191	1.31504e-09	0.954337	0.303	0.154	3.36467e-05	5.26527e-24	1.22939	0.32	0.139	1.34717e-19
NPAT	3.25986e-10	0.925408	1.27408e-14	0.925408	0.705	0.427	3.25986e-10	1.65485e-20	0.928567	0.689	0.416	4.2341e-16	1.15723e-45	1.22413	0.673	0.37	2.9609e-41
ARNTL2	1.18013e-18	0.925206	4.61239e-23	1.31846	0.775	0.452	1.18013e-18	7.16666e-30	1.10183	0.79	0.508	1.83366e-25	5.45888e-48	0.925206	0.855	0.583	1.39671e-43
COMTD1	8.11799e-07	0.922052	3.17282e-11	0.922052	0.555	0.316	8.11799e-07	9.04553e-16	0.990951	0.538	0.304	2.31439e-11	1.04908e-16	1.00406	0.376	0.21	2.68419e-12
TMEM97	1.47426e-15	0.921915	5.76198e-20	0.921915	0.838	0.582	1.47426e-15	2.79133e-35	1.12235	0.849	0.557	7.1419e-31	9.94583e-45	1.07188	0.771	0.497	2.54474e-40
MAMLD1	6.45191e-12	0.9183	2.52166e-16	1.06169	0.555	0.27	6.45191e-12	2.55396e-20	1.05237	0.563	0.283	6.53457e-16	7.64395e-27	0.9183	0.554	0.314	1.95578e-22
THOC3	6.66525e-06	0.918147	2.60504e-10	0.922802	0.503	0.287	6.66525e-06	2.55257e-19	1.1407	0.513	0.258	6.53101e-15	9.20698e-16	0.918147	0.381	0.216	2.3557e-11
POGLUT3	4.7923e-07	0.917586	1.87302e-11	1.03557	0.578	0.362	4.7923e-07	2.43559e-23	1.11267	0.664	0.388	6.2317e-19	1.20865e-25	0.917586	0.626	0.396	3.09246e-21
MEGF6	4.49107e-05	0.916933	1.75528e-09	0.916933	0.376	0.188	4.49107e-05	5.61082e-11	0.942577	0.332	0.164	1.43559e-06	1.18684e-11	0.930174	0.283	0.158	3.03665e-07
TXNDC16	2.79959e-09	0.915988	2.33895e-16	1.07474	0.595	0.308	5.98444e-12	1.09419e-13	0.915988	0.555	0.325	2.79959e-09	6.14702e-33	1.16413	0.521	0.268	1.57278e-28
BTG3	8.17225e-14	0.915387	3.19403e-18	1.00065	0.734	0.429	8.17225e-14	1.32449e-19	0.915387	0.697	0.423	3.38884e-15	2.00543e-34	1.01543	0.685	0.414	5.1311e-30
STON2	1.02494e-07	0.915172	4.00585e-12	1.13234	0.451	0.229	1.02494e-07	1.84455e-23	1.22656	0.538	0.253	4.71946e-19	4.95649e-25	0.915172	0.528	0.289	1.26817e-20
DBF4B	3.69683e-07	0.914244	1.44486e-11	1.24826	0.329	0.143	3.69683e-07	5.53087e-15	1.11044	0.332	0.142	1.41513e-10	2.25694e-13	0.914244	0.29	0.153	5.77461e-09
COLGALT1	8.18732e-16	0.914172	3.19992e-20	1.2488	0.63	0.316	8.18732e-16	4.02969e-25	1.18489	0.626	0.315	1.03104e-20	5.77619e-24	0.914172	0.514	0.287	1.4779e-19
HELLPAR	2.19134e-06	0.913289	8.56462e-11	1.22669	0.283	0.117	2.19134e-06	8.61189e-12	1.02432	0.298	0.136	2.20344e-07	2.04074e-16	0.913289	0.283	0.134	5.22144e-12
NETO2	2.91954e-23	0.911281	1.14107e-27	0.911281	0.96	0.807	2.91954e-23	1.20623e-36	0.922459	0.971	0.824	3.08626e-32	5.27987e-59	0.95466	0.963	0.787	1.35091e-54
PLCXD1	4.70602e-08	0.910828	1.83929e-12	0.973663	0.509	0.263	4.70602e-08	6.58282e-16	0.910828	0.475	0.236	1.68428e-11	1.16962e-35	1.30858	0.402	0.163	2.99258e-31
HNRNPAB	1.64171e-48	0.908008	6.41645e-53	1.19814	1	0.908	1.64171e-48	1.26723e-53	0.991809	0.996	0.929	3.24235e-49	3.16012e-81	0.908008	0.988	0.915	8.08548e-77
RBBP4	1.51803e-30	0.907006	5.93304e-35	0.969799	0.983	0.889	1.51803e-30	1.55535e-47	0.907006	0.987	0.892	3.97952e-43	1.67719e-83	0.958909	0.972	0.863	4.29126e-79
THOP1	8.49462e-09	0.906832	3.32003e-13	0.925468	0.578	0.317	8.49462e-09	8.0857e-14	0.906832	0.542	0.32	2.06881e-09	1.12583e-20	0.930692	0.486	0.283	2.88055e-16
LINC01515	6.14618e-20	0.906262	2.40217e-24	1.06072	0.896	0.642	6.14618e-20	3.42139e-27	0.923911	0.908	0.626	8.75396e-23	6.45435e-54	0.906262	0.951	0.73	1.65141e-49
POLE3	9.84446e-24	0.906182	8.13453e-29	1.30162	0.786	0.466	2.0813e-24	3.8476e-28	1.02167	0.815	0.487	9.84446e-24	1.47822e-28	0.906182	0.647	0.406	3.78216e-24
DBR1	7.53503e-08	0.900411	2.16311e-16	1.05738	0.52	0.237	5.53454e-12	2.94498e-12	0.92444	0.454	0.25	7.53503e-08	2.75741e-17	0.900411	0.39	0.213	7.05511e-13
AC090912.1	0.00145352	0.894783	5.68094e-08	0.894783	0.329	0.167	0.00145352	1.25865e-11	1.14617	0.332	0.164	3.22039e-07	3.755e-14	0.925154	0.294	0.153	9.60755e-10
FOXRED1	2.96682e-06	0.893375	1.15955e-10	0.935205	0.52	0.293	2.96682e-06	1.23401e-14	0.893375	0.55	0.317	3.15733e-10	6.24194e-21	0.921333	0.509	0.305	1.59706e-16
RPP25	1.4251e-06	0.892867	6.4127e-15	1.27514	0.41	0.176	1.64075e-10	3.37158e-12	0.968528	0.382	0.194	8.62651e-08	5.56985e-11	0.892867	0.264	0.146	1.4251e-06
ZNF714	3.01284e-05	0.890714	1.17753e-09	0.926201	0.41	0.214	3.01284e-05	8.64235e-10	0.890714	0.378	0.21	2.21123e-05	1.71023e-29	1.06234	0.481	0.235	4.37578e-25
IPO9	4.21757e-28	0.886634	7.65637e-36	1.12166	0.954	0.757	1.95896e-31	1.64839e-32	0.886634	0.937	0.788	4.21757e-28	3.42251e-63	0.936282	0.942	0.769	8.75683e-59
CEP135	3.2798e-08	0.883918	1.28187e-12	0.883918	0.543	0.285	3.2798e-08	1.53149e-31	1.22458	0.681	0.312	3.91848e-27	5.19931e-27	0.952306	0.558	0.313	1.33029e-22
AP3M2	9.86806e-17	0.883431	3.85682e-21	0.981133	0.832	0.534	9.86806e-17	9.6821e-30	1.07206	0.84	0.542	2.47726e-25	8.41029e-36	0.883431	0.773	0.515	2.15186e-31
ATAD3B	4.52117e-10	0.882989	1.76705e-14	1.18487	0.526	0.286	4.52117e-10	8.06999e-19	1.04216	0.563	0.298	2.06479e-14	1.70549e-20	0.882989	0.491	0.282	4.36368e-16
RAD1	1.64171e-15	0.877983	6.41645e-20	0.93145	0.884	0.608	1.64171e-15	3.02935e-23	0.877983	0.832	0.57	7.75088e-19	3.65355e-40	0.919643	0.773	0.495	9.34798e-36
MRE11	6.89488e-22	0.876594	2.69478e-26	0.916833	0.954	0.682	6.89488e-22	2.47098e-30	0.876594	0.895	0.659	6.32224e-26	1.65988e-45	0.891773	0.888	0.628	4.24697e-41
KCNAB2	0.00111312	0.876418	4.35051e-08	0.912909	0.341	0.174	0.00111312	1.18075e-10	0.972852	0.357	0.187	3.02107e-06	1.13855e-14	0.876418	0.36	0.204	2.9131e-10
TFAP4	0.000505441	0.874705	1.97546e-08	0.874705	0.462	0.267	0.000505441	1.05979e-13	0.939821	0.492	0.277	2.71157e-09	8.23359e-15	0.910518	0.404	0.245	2.10665e-10
JPH1	1.14444e-08	0.874625	4.47293e-13	0.932175	0.699	0.488	1.14444e-08	3.56593e-18	0.874625	0.748	0.522	9.12378e-14	5.92784e-28	0.931339	0.71	0.477	1.5167e-23
GLA	6.10377e-08	0.870591	4.49624e-21	1.48404	0.445	0.167	1.15041e-16	1.46667e-20	1.34133	0.403	0.168	3.75263e-16	2.38559e-12	0.870591	0.28	0.15	6.10377e-08
RNF212	2.28872e-06	0.867815	8.94522e-11	0.893829	0.607	0.388	2.28872e-06	2.03308e-14	0.867815	0.626	0.397	5.20185e-10	1.27195e-29	0.947644	0.664	0.421	3.25442e-25
ANKRD9	4.21721e-06	0.867047	1.64825e-10	0.867047	0.52	0.292	4.21721e-06	1.15963e-21	1.2085	0.496	0.227	2.96703e-17	1.36759e-20	1.13516	0.353	0.174	3.49913e-16
BCL2L12	3.5439e-07	0.865424	1.38509e-11	0.952433	0.457	0.231	3.5439e-07	1.75726e-15	1.1148	0.441	0.224	4.49613e-11	1.44782e-17	0.865424	0.428	0.244	3.70439e-13
TOR3A	6.26862e-14	0.862403	2.45002e-18	1.066	0.659	0.353	6.26862e-14	8.16832e-24	1.04742	0.689	0.381	2.08995e-19	5.38921e-22	0.862403	0.542	0.322	1.37888e-17
BACE1	3.61392e-08	0.858379	1.41246e-12	1.02235	0.486	0.246	3.61392e-08	5.24995e-17	1.00503	0.542	0.292	1.34325e-12	3.30909e-17	0.858379	0.446	0.261	8.46663e-13
SMC4	7.30787e-35	0.855917	1.2468e-40	1.17877	0.942	0.648	3.19005e-36	2.8562e-39	0.857582	0.929	0.64	7.30787e-35	1.26004e-69	0.855917	0.946	0.659	3.22394e-65
ABCB10	8.11363e-07	0.85567	3.17112e-11	0.985657	0.636	0.421	8.11363e-07	5.58981e-18	0.85567	0.702	0.438	1.43021e-13	1.6549e-26	0.870401	0.64	0.392	4.23423e-22
SUPT16H	2.8542e-50	0.855448	1.11553e-54	1.19607	0.988	0.898	2.8542e-50	1.93652e-57	0.967988	0.987	0.905	4.95478e-53	1.4479e-74	0.855448	0.981	0.906	3.7046e-70
ARL13B	1.08234e-07	0.852049	4.23021e-12	0.978794	0.601	0.379	1.08234e-07	2.24687e-17	0.852049	0.676	0.404	5.74885e-13	7.09674e-29	1.01544	0.629	0.377	1.81577e-24
SPDL1	3.00871e-08	0.85173	1.02918e-20	1.33054	0.48	0.187	2.63326e-16	1.17592e-12	0.926559	0.403	0.208	3.00871e-08	5.56971e-17	0.85173	0.343	0.175	1.42507e-12
RAD51B	7.80887e-17	0.850398	3.05201e-21	0.850398	0.983	0.792	7.80887e-17	1.46263e-33	0.893938	0.962	0.847	3.74229e-29	7.06984e-57	0.911479	0.97	0.847	1.80889e-52
ZNF100	1.57797e-05	0.850053	6.16733e-10	0.850053	0.549	0.325	1.57797e-05	4.65836e-26	1.15467	0.63	0.309	1.19189e-21	7.88158e-43	1.37157	0.549	0.264	2.01658e-38
CKLF	4.00701e-11	0.849745	1.5661e-15	0.849745	0.838	0.649	4.00701e-11	1.0607e-27	0.932812	0.878	0.629	2.71391e-23	5.71872e-38	0.90168	0.829	0.582	1.46319e-33
EXOSC8	5.32254e-14	0.848863	2.08026e-18	0.962107	0.803	0.524	5.32254e-14	1.25505e-22	0.848863	0.849	0.59	3.21117e-18	4.38604e-34	0.896881	0.778	0.547	1.12221e-29
TOX2	1.63119e-05	0.848604	6.37531e-10	0.848604	0.538	0.32	1.63119e-05	3.23394e-15	0.900958	0.597	0.351	8.27437e-11	1.07654e-18	0.895546	0.537	0.349	2.75444e-14
RNASEH2B	3.8167e-09	0.847668	1.49171e-13	0.868709	0.769	0.546	3.8167e-09	4.48904e-23	0.847668	0.84	0.567	1.14857e-18	4.47753e-40	0.989641	0.794	0.559	1.14562e-35
EML6	5.16017e-05	0.84742	2.0168e-09	0.84742	0.306	0.137	5.16017e-05	8.24335e-11	1.04771	0.324	0.162	2.10914e-06	2.51317e-29	1.35699	0.379	0.164	6.43019e-25
KIF18B	8.97171e-33	0.847034	9.32721e-48	1.73836	0.318	0.047	2.38646e-43	3.31597e-57	1.65433	0.378	0.07	8.48424e-53	3.50649e-37	0.847034	0.278	0.08	8.97171e-33
PPIF	2.96341e-13	0.846382	5.47967e-21	1.12521	0.734	0.434	1.40203e-16	1.15821e-17	0.84656	0.706	0.457	2.96341e-13	4.05027e-23	0.846382	0.577	0.354	1.0363e-18
SLF2	1.51038e-12	0.846365	5.90315e-17	0.846365	0.85	0.574	1.51038e-12	4.48537e-22	0.867442	0.828	0.585	1.14763e-17	4.69845e-42	0.906233	0.829	0.582	1.20215e-37
KIF11	3.13133e-29	0.842166	1.22385e-33	1.21715	0.509	0.152	3.13133e-29	1.70589e-35	0.932911	0.504	0.165	4.36469e-31	4.2072e-54	0.842166	0.474	0.156	1.07645e-49
MRM2	3.42356e-10	0.841201	1.33806e-14	0.841201	0.711	0.439	3.42356e-10	3.90871e-21	0.912061	0.723	0.447	1.00008e-16	4.06822e-26	0.95326	0.6	0.371	1.04089e-21
AP1S2	3.09917e-06	0.839668	1.21128e-10	0.839668	0.636	0.412	3.09917e-06	1.61554e-15	0.916772	0.647	0.416	4.13351e-11	3.55593e-21	0.870056	0.619	0.401	9.09821e-17
ERI1	1.37608e-07	0.838666	5.37827e-12	0.838666	0.688	0.46	1.37608e-07	8.68683e-24	0.886524	0.756	0.441	2.22261e-19	3.10891e-35	0.92663	0.666	0.371	7.95446e-31
CLTCL1	0.00142041	0.836312	8.22377e-09	1.10646	0.364	0.195	0.000210413	5.55153e-08	0.836312	0.345	0.199	0.00142041	1.81404e-25	1.14113	0.432	0.215	4.64141e-21
EVL	2.44719e-05	0.835609	9.56455e-10	0.877092	0.514	0.303	2.44719e-05	2.13586e-10	0.835609	0.525	0.335	5.46481e-06	9.99113e-25	1.01476	0.568	0.341	2.55633e-20
KLF11	3.23569e-06	0.835176	1.26463e-10	0.920272	0.497	0.276	3.23569e-06	1.14447e-14	0.835176	0.529	0.283	2.92824e-10	3.39681e-22	0.902413	0.519	0.303	8.69109e-18
ABCA2	0.000414512	0.834731	1.75529e-12	1.13642	0.405	0.187	4.4911e-08	1.62007e-08	0.869941	0.319	0.173	0.000414512	5.05351e-10	0.834731	0.283	0.166	1.29299e-05
L2HGDH	3.86025e-17	0.833971	1.50874e-21	0.990245	0.827	0.496	3.86025e-17	3.18418e-24	0.949719	0.807	0.527	8.14704e-20	1.99604e-29	0.833971	0.731	0.471	5.10706e-25
TRIM47	4.6487e-09	0.832884	3.16452e-17	1.18293	0.503	0.224	8.09674e-13	1.81689e-13	1.01526	0.412	0.21	4.6487e-09	2.61036e-14	0.832884	0.376	0.218	6.67886e-10
RASSF1	3.53821e-05	0.832666	1.38287e-09	0.862086	0.497	0.286	3.53821e-05	2.38213e-11	0.832666	0.45	0.25	6.09493e-07	5.90845e-18	0.927565	0.416	0.234	1.51174e-13
ALMS1	7.81786e-14	0.832182	3.05552e-18	0.996489	0.769	0.516	7.81786e-14	6.97298e-24	0.921583	0.836	0.563	1.78411e-19	2.21179e-35	0.832182	0.836	0.613	5.65908e-31
CBX5	6.71642e-43	0.829841	2.62504e-47	1.04385	1	0.921	6.71642e-43	2.73995e-57	0.947708	1	0.93	7.01045e-53	1.86927e-83	0.829841	0.993	0.936	4.7827e-79
PEA15	0.002855	0.828569	1.11584e-07	0.828569	0.416	0.24	0.002855	8.13349e-17	1.11746	0.445	0.215	2.08103e-12	1.08665e-21	1.10177	0.386	0.193	2.7803e-17
ARAP3	0.0302624	0.827294	1.18277e-06	0.855134	0.37	0.216	0.0302624	1.27649e-13	1.01555	0.412	0.209	3.26603e-09	8.04762e-15	0.827294	0.444	0.277	2.05907e-10
TNFRSF1B	0.00182	0.826648	7.11327e-08	0.939668	0.382	0.21	0.00182	1.67445e-10	0.97218	0.382	0.211	4.28424e-06	1.50798e-09	0.826648	0.252	0.144	3.85831e-05
SUZ12	5.51809e-39	0.82632	7.17674e-44	0.951391	0.983	0.904	1.83624e-39	2.15668e-43	0.864967	1	0.902	5.51809e-39	1.75228e-66	0.82632	0.984	0.892	4.48337e-62
SMIM13	3.53571e-05	0.825991	1.38189e-09	0.825991	0.509	0.295	3.53571e-05	2.01602e-16	0.950802	0.542	0.289	5.15819e-12	1.41334e-20	0.906724	0.493	0.289	3.61617e-16
TEAD4	6.31353e-05	0.82593	2.46757e-09	0.975844	0.549	0.355	6.31353e-05	9.8559e-26	1.13668	0.668	0.355	2.52173e-21	4.52568e-25	0.82593	0.661	0.421	1.15794e-20
SSX2IP	1.82239e-07	0.824991	7.12259e-12	0.824991	0.659	0.425	1.82239e-07	7.52229e-15	0.837869	0.685	0.462	1.92465e-10	3.50925e-25	0.829969	0.661	0.429	8.97877e-21
CSE1L	8.24687e-20	0.823749	5.24461e-42	1.24003	0.948	0.706	1.34189e-37	3.2232e-24	0.823749	0.916	0.715	8.24687e-20	3.5773e-58	0.963134	0.925	0.687	9.15289e-54
CEP295	1.87013e-09	0.817922	7.30919e-14	0.817922	0.746	0.478	1.87013e-09	2.5788e-18	0.859822	0.735	0.482	6.59811e-14	1.32727e-36	1.01487	0.703	0.428	3.39595e-32
GTPBP3	0.00362698	0.817628	1.41757e-07	0.817628	0.48	0.3	0.00362698	6.72841e-15	0.956381	0.513	0.285	1.72153e-10	5.70617e-19	0.829731	0.465	0.264	1.45998e-14
GPN3	3.0373e-15	0.816572	1.1871e-19	1.00756	0.769	0.473	3.0373e-15	2.53075e-20	0.902838	0.744	0.486	6.47517e-16	2.93112e-25	0.816572	0.647	0.407	7.49956e-21
RBBP8	6.63005e-16	0.816371	2.59128e-20	0.848392	0.936	0.781	6.63005e-16	5.65161e-28	0.816371	0.95	0.781	1.44602e-23	2.73244e-51	0.856532	0.935	0.78	6.99123e-47
MYH10	1.25733e-06	0.816238	4.91412e-11	0.828655	0.694	0.507	1.25733e-06	1.55848e-17	0.816238	0.798	0.551	3.98754e-13	1.074e-28	0.852693	0.766	0.533	2.74794e-24
SIVA1	1.8941e-23	0.815065	7.40289e-28	1.02721	0.977	0.794	1.8941e-23	1.07e-30	0.954867	0.941	0.817	2.73771e-26	4.95165e-43	0.815065	0.928	0.752	1.26693e-38
ARHGEF26	0.0316683	0.813197	1.23772e-06	0.813197	0.405	0.244	0.0316683	2.17976e-14	0.842047	0.479	0.25	5.57712e-10	6.69397e-23	1.08821	0.444	0.236	1.71272e-18
TTK	2.54044e-48	0.808327	2.44699e-54	1.38467	0.416	0.069	6.26088e-50	1.7657e-59	1.22508	0.458	0.094	4.51773e-55	9.92901e-53	0.808327	0.367	0.099	2.54044e-48
SFXN2	0.000145876	0.802169	1.30146e-15	1.12173	0.462	0.202	3.32992e-11	5.70139e-09	0.802169	0.37	0.207	0.000145876	3.27249e-26	1.2942	0.388	0.182	8.373e-22
ANKRD36	4.97002e-08	0.796706	1.94248e-12	0.796706	0.769	0.565	4.97002e-08	3.29026e-30	0.980972	0.874	0.581	8.41847e-26	2.86074e-43	0.886879	0.914	0.684	7.3195e-39
COPS3	2.51987e-10	0.79368	9.84862e-15	0.885612	0.746	0.484	2.51987e-10	9.61179e-19	0.79368	0.765	0.53	2.45927e-14	8.43048e-35	0.941241	0.713	0.444	2.15702e-30
AADAT	0.015314	0.793332	5.9853e-07	0.865904	0.324	0.172	0.015314	4.33863e-10	0.871001	0.374	0.204	1.11008e-05	1.02299e-10	0.793332	0.348	0.216	2.61741e-06
TBC1D1	1.85931e-12	0.792044	7.26692e-17	0.989744	0.769	0.538	1.85931e-12	2.81943e-29	1.08113	0.819	0.516	7.21378e-25	2.95571e-28	0.792044	0.78	0.567	7.56247e-24
ICMT	3.03741e-09	0.79067	1.18714e-13	0.91383	0.734	0.517	3.03741e-09	1.3559e-16	0.79067	0.777	0.548	3.4692e-12	9.96547e-26	0.83039	0.717	0.493	2.54977e-21
GFOD1	7.08089e-08	0.790493	2.7377e-14	1.07321	0.543	0.284	7.00467e-10	2.76749e-12	0.790493	0.529	0.307	7.08089e-08	1.25017e-30	1.07464	0.554	0.297	3.19867e-26
HMCES	3.22576e-06	0.789859	1.26075e-10	0.810903	0.659	0.432	3.22576e-06	5.12986e-16	0.789859	0.689	0.429	1.31253e-11	2.45551e-29	0.91916	0.621	0.361	6.28267e-25
CEP72	6.80836e-08	0.789738	9.83345e-17	0.789738	0.792	0.49	2.51599e-12	2.66097e-12	0.792852	0.66	0.464	6.80836e-08	1.28846e-32	0.902205	0.708	0.438	3.29666e-28
SLC12A8	2.74995e-05	0.788778	1.07479e-09	0.788778	0.572	0.352	2.74995e-05	9.70897e-26	1.08912	0.689	0.378	2.48414e-21	3.14206e-23	0.831009	0.582	0.341	8.03927e-19
WDYHV1	7.95332e-05	0.788419	3.10847e-09	0.788419	0.549	0.331	7.95332e-05	1.43721e-12	0.804648	0.559	0.339	3.67725e-08	3.6598e-24	0.987479	0.526	0.308	9.36396e-20
LRP8	3.45796e-17	0.787331	1.3515e-21	1.10186	0.78	0.481	3.45796e-17	3.06447e-28	0.9704	0.836	0.546	7.84074e-24	2.02677e-25	0.787331	0.741	0.518	5.1857e-21
SHMT1	2.66586e-09	0.786505	1.04192e-13	0.913965	0.676	0.423	2.66586e-09	6.7527e-17	0.786505	0.723	0.462	1.72774e-12	5.67943e-35	0.948187	0.701	0.418	1.45314e-30
CTDSPL2	2.28823e-08	0.785836	8.94331e-13	0.785836	0.78	0.549	2.28823e-08	1.49661e-16	0.826465	0.773	0.545	3.82923e-12	5.15741e-35	0.932944	0.769	0.518	1.31957e-30
THSD4	7.76761e-15	0.783316	7.45847e-27	1.57798	0.584	0.244	1.90832e-22	2.76766e-24	1.41463	0.525	0.248	7.08134e-20	3.03588e-19	0.783316	0.409	0.217	7.76761e-15
SAE1	1.56505e-09	0.782256	6.11682e-14	0.782256	0.855	0.672	1.56505e-09	5.76915e-27	0.812504	0.903	0.699	1.47609e-22	1.37397e-46	0.862314	0.89	0.666	3.51544e-42
PPIH	1.23514e-08	0.78065	4.82741e-13	0.802001	0.763	0.517	1.23514e-08	2.07162e-22	0.940802	0.794	0.517	5.30045e-18	6.27036e-24	0.78065	0.666	0.445	1.60433e-19
CNTNAP3B	0.00010137	0.780302	3.96193e-09	1.07353	0.295	0.134	0.00010137	1.91703e-14	1.08243	0.336	0.147	4.90492e-10	2.43555e-09	0.780302	0.29	0.175	6.2316e-05
FAM81A	3.72454e-08	0.780268	1.45569e-12	0.780268	0.607	0.351	3.72454e-08	1.4069e-28	1.19233	0.681	0.343	3.59969e-24	4.16857e-29	1.017	0.586	0.335	1.06657e-24
C9orf64	0.0163561	0.780197	6.39258e-07	0.800157	0.439	0.27	0.0163561	8.73427e-12	0.870683	0.492	0.288	2.23475e-07	2.00168e-14	0.780197	0.458	0.292	5.1215e-10
MRPL17	3.04925e-11	0.780165	1.35627e-17	0.934245	0.775	0.525	3.47016e-13	1.19177e-15	0.787168	0.739	0.527	3.04925e-11	3.66744e-19	0.780165	0.612	0.416	9.38351e-15
CAMKK1	7.69499e-06	0.778624	8.77928e-13	1.08412	0.457	0.22	2.24627e-08	3.0075e-10	0.866219	0.395	0.218	7.69499e-06	1.96544e-10	0.778624	0.369	0.237	5.02879e-06
GUSB	5.70637e-06	0.777778	2.23027e-10	0.777778	0.636	0.404	5.70637e-06	3.1701e-17	0.867815	0.668	0.415	8.11103e-13	6.7838e-33	0.986705	0.65	0.374	1.7357e-28
AKAP7	0.0181615	0.777642	7.09821e-07	0.777642	0.41	0.24	0.0181615	2.12527e-12	0.838791	0.5	0.285	5.43772e-08	2.0931e-19	0.87176	0.465	0.265	5.3554e-15
SFXN5	0.0229078	0.777085	8.95326e-07	0.777085	0.416	0.249	0.0229078	1.98568e-09	0.913456	0.471	0.299	5.08057e-05	1.5243e-32	1.01522	0.57	0.298	3.90008e-28
YWHAH	4.37421e-19	0.775542	1.70961e-23	0.989945	0.902	0.671	4.37421e-19	2.04597e-38	1.03455	0.924	0.679	5.23483e-34	1.3844e-33	0.775542	0.853	0.617	3.54213e-29
FAM24B	0.000839414	0.774369	2.2198e-09	0.859641	0.48	0.277	5.67957e-05	3.28076e-08	0.774369	0.445	0.279	0.000839414	1.8143e-09	0.795298	0.386	0.259	4.64206e-05
CEP85	4.09235e-05	0.773668	5.4727e-10	1.00274	0.486	0.275	1.40025e-05	1.59945e-09	0.773668	0.466	0.286	4.09235e-05	3.04435e-21	0.905505	0.495	0.286	7.78928e-17
CAD	1.51378e-11	0.773207	5.91645e-16	1.02852	0.642	0.361	1.51378e-11	5.25532e-18	0.863453	0.676	0.406	1.34463e-13	2.2115e-23	0.773207	0.689	0.47	5.65833e-19
PDS5B	4.02074e-18	0.771262	1.57146e-22	0.771262	0.977	0.855	4.02074e-18	1.65436e-26	0.814435	0.933	0.839	4.23286e-22	1.00865e-51	0.82828	0.96	0.812	2.58074e-47
ISYNA1	0.00189206	0.770778	7.39488e-08	0.91625	0.393	0.22	0.00189206	3.14991e-12	1.04099	0.378	0.194	8.05935e-08	1.42241e-08	0.770778	0.285	0.177	0.000363938
CHAC2	1.28288e-07	0.769776	1.90949e-21	1.43754	0.509	0.211	4.88561e-17	1.07434e-22	1.20746	0.538	0.254	2.74882e-18	5.01397e-12	0.769776	0.4	0.252	1.28288e-07
PEG10	1.058e-09	0.769054	4.13507e-14	1.12712	0.526	0.27	1.058e-09	1.02492e-19	1.13187	0.546	0.283	2.62237e-15	1.27165e-17	0.769054	0.486	0.294	3.25365e-13
XYLB	1.10677e-14	0.768587	4.32568e-19	0.962623	0.861	0.584	1.10677e-14	1.0698e-21	0.768587	0.882	0.664	2.7372e-17	2.56904e-56	0.989243	0.881	0.619	6.57314e-52
SCAPER	2.86334e-09	0.767031	1.11911e-13	0.767031	0.844	0.658	2.86334e-09	2.89464e-21	0.847139	0.861	0.641	7.40624e-17	4.73745e-58	1.039	0.902	0.61	1.21212e-53
TUBGCP3	1.34303e-11	0.766921	5.24909e-16	0.766921	0.873	0.718	1.34303e-11	3.60773e-28	0.920664	0.903	0.713	9.23074e-24	3.82221e-45	0.804839	0.918	0.696	9.77951e-41
CD83	0.000141326	0.765911	2.40626e-19	1.7708	0.306	0.095	6.15664e-15	3.0881e-13	1.14538	0.294	0.127	7.9012e-09	5.52357e-09	0.765911	0.264	0.155	0.000141326
RANBP1	9.24582e-36	0.7657	3.61363e-40	1.04401	0.983	0.875	9.24582e-36	2.53308e-47	0.923304	0.992	0.915	6.48113e-43	1.46001e-47	0.7657	0.956	0.896	3.73558e-43
ZDHHC23	7.35963e-08	0.764534	2.87643e-12	1.11131	0.497	0.266	7.35963e-08	6.16191e-13	0.911056	0.5	0.288	1.57659e-08	4.26037e-13	0.764534	0.437	0.279	1.09006e-08
KIF18A	6.5598e-20	0.764344	2.56382e-24	1.07674	0.538	0.204	6.5598e-20	3.82749e-27	0.829321	0.504	0.195	9.79302e-23	4.90331e-35	0.764344	0.477	0.203	1.25456e-30
C16orf74	9.35992e-11	0.761749	3.65822e-15	1.08099	0.694	0.456	9.35992e-11	4.46374e-17	0.797784	0.777	0.526	1.14209e-12	1.76236e-28	0.761749	0.79	0.555	4.50917e-24
ARHGAP44	5.17698e-06	0.758683	2.02336e-10	1.03724	0.462	0.249	5.17698e-06	3.63021e-12	0.758683	0.504	0.29	9.28826e-08	4.50883e-18	0.847562	0.484	0.288	1.15363e-13
GGH	1.78443e-08	0.756064	3.65952e-13	0.954819	0.468	0.222	9.36325e-09	6.97424e-13	0.756064	0.538	0.306	1.78443e-08	8.15875e-17	0.78107	0.474	0.286	2.0875e-12
HDGFL3	6.78494e-11	0.754816	2.65182e-15	0.982211	0.682	0.402	6.78494e-11	3.20855e-16	0.754816	0.685	0.419	8.20939e-12	9.86048e-33	0.976055	0.678	0.408	2.5229e-28
PPM1G	6.73427e-35	0.753815	2.63201e-39	1.04929	0.988	0.896	6.73427e-35	1.07476e-56	0.968705	0.987	0.911	2.74987e-52	1.36167e-62	0.753815	0.993	0.931	3.48397e-58
HS6ST2	4.00268e-27	0.752836	1.5644e-31	1.01536	0.994	0.775	4.00268e-27	1.37461e-36	0.885114	0.987	0.852	3.51707e-32	3.53064e-42	0.752836	0.96	0.867	9.0335e-38
ACYP1	8.96744e-08	0.751658	3.50482e-12	0.795885	0.775	0.569	8.96744e-08	4.18397e-24	0.903066	0.811	0.555	1.07051e-19	3.51053e-21	0.751658	0.675	0.474	8.98204e-17
CDK4	3.66696e-18	0.750578	1.43319e-22	0.870196	0.925	0.768	3.66696e-18	2.19103e-26	0.750578	0.945	0.796	5.60596e-22	4.93544e-52	0.917068	0.916	0.711	1.26278e-47
PPRC1	5.86698e-09	0.750106	2.29304e-13	0.853438	0.653	0.377	5.86698e-09	7.44915e-16	0.797884	0.668	0.409	1.90594e-11	3.86916e-22	0.750106	0.657	0.437	9.89964e-18
NUP62	2.88192e-05	0.749332	1.12637e-09	0.776237	0.607	0.389	2.88192e-05	7.08616e-11	0.770851	0.588	0.399	1.81307e-06	2.88557e-17	0.749332	0.544	0.352	7.38303e-13
MAGOHB	9.63639e-05	0.749278	3.76627e-09	0.765849	0.555	0.336	9.63639e-05	2.64985e-10	0.749278	0.563	0.371	6.7799e-06	1.34876e-16	0.765392	0.53	0.338	3.45095e-12
NOP56	5.07596e-10	0.747253	1.98388e-14	0.831518	0.786	0.558	5.07596e-10	8.36511e-18	0.747253	0.807	0.624	2.1403e-13	7.23964e-36	0.796728	0.874	0.717	1.85233e-31
MDM1	0.00151934	0.745692	1.905e-09	0.862121	0.422	0.219	4.87414e-05	5.93817e-08	0.745692	0.408	0.25	0.00151934	2.35967e-23	1.03722	0.453	0.239	6.03744e-19
RBBP7	1.02783e-14	0.745327	4.01715e-19	0.745327	0.954	0.784	1.02783e-14	7.70423e-30	0.809494	0.929	0.769	1.9712e-25	6.00464e-43	0.777795	0.916	0.715	1.53635e-38
NANP	0.0144415	0.743827	1.90312e-08	0.883554	0.416	0.227	0.000486933	5.64428e-07	0.743827	0.34	0.203	0.0144415	3.76419e-21	1.11852	0.353	0.171	9.63105e-17
SAAL1	1.7849e-06	0.743649	2.9624e-12	0.989034	0.468	0.231	7.5796e-08	5.82478e-11	0.818177	0.433	0.241	1.49033e-06	6.97608e-11	0.743649	0.36	0.225	1.7849e-06
CYBRD1	1.29017e-11	0.743562	5.04247e-16	0.987094	0.775	0.557	1.29017e-11	8.73244e-17	0.743562	0.761	0.508	2.23428e-12	1.17725e-36	0.887706	0.825	0.576	3.01211e-32
ROR2	2.60991e-06	0.743027	1.02006e-10	0.869701	0.642	0.411	2.60991e-06	4.05833e-13	0.758508	0.668	0.426	1.03836e-08	7.52443e-23	0.743027	0.776	0.571	1.9252e-18
HPF1	2.74744e-08	0.741791	1.07381e-12	0.867588	0.636	0.389	2.74744e-08	6.74743e-13	0.75349	0.643	0.416	1.7264e-08	1.52976e-18	0.741791	0.605	0.405	3.91404e-14
ITGB3BP	1.14382e-10	0.741472	4.47051e-15	0.741472	0.873	0.666	1.14382e-10	3.05115e-25	0.903621	0.903	0.662	7.80666e-21	3.19921e-52	0.962274	0.9	0.655	8.1855e-48
TIMM8A	0.00240202	0.741147	9.42103e-11	0.966778	0.422	0.209	2.41047e-06	1.15162e-09	0.851998	0.412	0.24	2.94653e-05	9.38801e-08	0.741147	0.278	0.177	0.00240202
ARHGAP11A	1.78773e-20	0.739747	6.98716e-25	1.09453	0.503	0.177	1.78773e-20	4.91006e-28	1.0058	0.487	0.186	1.25629e-23	1.20469e-37	0.739747	0.456	0.179	3.08233e-33
NUP58	1.60311e-19	0.739531	6.26557e-24	0.809884	0.954	0.809	1.60311e-19	2.45422e-29	0.739531	0.971	0.803	6.27937e-25	2.32834e-49	0.819562	0.942	0.791	5.9573e-45
TMEM209	0.00142668	0.738075	5.57601e-08	0.738075	0.555	0.36	0.00142668	5.15466e-14	0.828402	0.605	0.38	1.31887e-09	7.0707e-21	0.793308	0.589	0.368	1.80911e-16
B3GLCT	0.00118778	0.737934	4.64232e-08	0.737934	0.387	0.205	0.00118778	1.26419e-12	1.07595	0.378	0.191	3.23455e-08	6.1943e-11	0.759025	0.322	0.192	1.58487e-06
NFATC2IP	4.22752e-07	0.7363	1.65228e-11	0.7363	0.827	0.638	4.22752e-07	1.94893e-18	0.808464	0.815	0.626	4.98654e-14	5.52443e-40	0.933673	0.806	0.549	1.41348e-35
CYP2U1	0.0105543	0.73416	4.12504e-07	0.73416	0.451	0.276	0.0105543	1.43892e-09	0.748617	0.492	0.308	3.68163e-05	5.08393e-14	0.814518	0.428	0.268	1.30077e-09
PAXIP1	2.49052e-05	0.732731	9.7339e-10	0.777134	0.682	0.48	2.49052e-05	4.47403e-12	0.732731	0.685	0.488	1.14473e-07	1.2187e-28	0.927072	0.687	0.446	3.11816e-24
TRIM37	7.54609e-14	0.731504	2.9493e-18	0.963956	0.78	0.521	7.54609e-14	2.40048e-18	0.788889	0.828	0.601	6.14188e-14	4.18671e-27	0.731504	0.794	0.564	1.07121e-22
HAUS2	0.00160416	0.730308	6.26967e-08	0.730308	0.514	0.317	0.00160416	3.7048e-17	1.02773	0.563	0.316	9.4791e-13	3.94715e-19	0.949648	0.484	0.295	1.00992e-14
DLEU2	1.729e-10	0.728901	6.75758e-15	0.754646	0.913	0.754	1.729e-10	2.47146e-18	0.728901	0.878	0.762	6.32348e-14	9.85732e-34	0.810397	0.916	0.748	2.52209e-29
CPSF4	2.89796e-05	0.728101	1.13263e-09	0.803717	0.561	0.342	2.89796e-05	5.7261e-13	0.817137	0.571	0.351	1.46508e-08	6.27543e-15	0.728101	0.484	0.304	1.60563e-10
METTL3	0.000296878	0.727658	1.18036e-14	1.05522	0.538	0.274	3.02007e-10	1.16032e-08	0.727658	0.433	0.264	0.000296878	4.8374e-19	0.947703	0.421	0.233	1.2377e-14
GLS2	0.00793247	0.723743	3.10032e-07	0.780806	0.439	0.266	0.00793247	2.0901e-08	0.723743	0.45	0.279	0.000534774	4.97696e-16	0.755169	0.444	0.261	1.2734e-11
MIS12	0.00722065	0.723202	2.82211e-07	0.800424	0.439	0.264	0.00722065	2.40478e-18	0.967599	0.55	0.282	6.15288e-14	1.29078e-10	0.723202	0.395	0.256	3.30259e-06
HLTF	3.63917e-17	0.721345	1.42233e-21	0.847324	0.913	0.708	3.63917e-17	3.04935e-28	0.863617	0.933	0.73	7.80205e-24	1.19796e-33	0.721345	0.897	0.692	3.0651e-29
NUP62CL	2.53148e-05	0.720758	9.89399e-10	0.720758	0.723	0.497	2.53148e-05	2.41309e-13	0.761504	0.714	0.483	6.17414e-09	2.08645e-35	0.859512	0.792	0.518	5.3384e-31
NDC80	5.41204e-34	0.720595	2.85792e-45	1.50444	0.387	0.071	7.31227e-41	3.44755e-43	0.966313	0.416	0.101	8.8209e-39	2.11524e-38	0.720595	0.362	0.121	5.41204e-34
SLC2A4RG	1.03521e-07	0.718858	4.04601e-12	0.791897	0.717	0.47	1.03521e-07	3.84387e-15	0.753045	0.714	0.469	9.83493e-11	6.63828e-17	0.718858	0.64	0.471	1.69847e-12
CCHCR1	0.00197065	0.71695	7.70205e-08	0.802783	0.457	0.27	0.00197065	2.09619e-08	0.71695	0.408	0.242	0.000536332	6.14878e-14	0.918728	0.369	0.219	1.57323e-09
BAG2	0.00476067	0.714585	1.86065e-07	0.714585	0.543	0.364	0.00476067	1.23614e-12	0.849024	0.601	0.388	3.16278e-08	3.9701e-16	0.757313	0.53	0.345	1.01579e-11
CEP192	5.74905e-20	0.714262	2.24695e-24	0.891561	0.936	0.764	5.74905e-20	3.04264e-27	0.804761	0.937	0.779	7.78489e-23	2.47506e-36	0.714262	0.928	0.768	6.33268e-32
TRAF2	0.00262924	0.712472	1.02761e-07	0.898757	0.399	0.231	0.00262924	4.79763e-11	0.92708	0.408	0.226	1.22752e-06	7.39612e-10	0.712472	0.311	0.185	1.89237e-05
GPD2	2.05136e-10	0.712415	8.01749e-15	0.712415	0.913	0.74	2.05136e-10	9.31858e-24	0.862909	0.899	0.718	2.38425e-19	8.41013e-52	0.848309	0.963	0.814	2.15182e-47
KDM2B	0.000185183	0.711347	7.23767e-09	0.717043	0.642	0.448	0.000185183	4.62347e-12	0.711347	0.702	0.495	1.18296e-07	2.38669e-18	0.726114	0.654	0.472	6.10659e-14
HAUS3	0.0441454	0.708556	2.40928e-07	0.733697	0.439	0.259	0.00616437	1.72538e-06	0.708556	0.378	0.242	0.0441454	3.11503e-12	0.859443	0.325	0.188	7.97012e-08
TACC3	5.05188e-24	0.706799	1.97447e-28	1.37443	0.497	0.168	5.05188e-24	3.88718e-31	0.999433	0.538	0.201	9.94573e-27	5.53629e-30	0.706799	0.453	0.2	1.41652e-25
TMPO	1.35375e-42	0.703821	5.291e-47	0.937543	1	0.926	1.35375e-42	1.35284e-49	0.838057	0.996	0.919	3.46138e-45	1.18732e-65	0.703821	0.993	0.923	3.03788e-61
MAP3K3	1.87115e-06	0.700168	7.31318e-11	0.737934	0.636	0.378	1.87115e-06	1.30202e-11	0.700168	0.609	0.382	3.33135e-07	6.38715e-19	0.815416	0.556	0.353	1.63422e-14
KIF20B	1.10612e-40	0.699165	4.32316e-45	1.09055	0.884	0.425	1.10612e-40	1.49843e-55	0.933346	0.912	0.443	3.83389e-51	6.0525e-63	0.699165	0.829	0.418	1.54859e-58
COMMD4	0.00770237	0.695298	3.01038e-07	0.695298	0.572	0.409	0.00770237	9.9594e-19	0.887631	0.693	0.427	2.54821e-14	1.68778e-14	0.761648	0.5	0.335	4.31835e-10
SCLY	4.5139e-07	0.695214	1.76421e-11	0.786062	0.751	0.545	4.5139e-07	5.21243e-16	0.707703	0.832	0.616	1.33365e-11	2.34055e-27	0.695214	0.857	0.683	5.98852e-23
CCDC137	1.98619e-09	0.693497	7.76278e-14	0.902994	0.688	0.456	1.98619e-09	1.24369e-14	0.693497	0.697	0.45	3.1821e-10	3.27734e-23	0.849738	0.607	0.384	8.3854e-19
CNOT10	1.62388e-11	0.692131	6.34674e-16	0.835143	0.821	0.622	1.62388e-11	2.67941e-18	0.692131	0.853	0.663	6.85555e-14	2.08631e-36	0.845906	0.846	0.637	5.33803e-32
BCL7A	0.00486199	0.690943	1.90025e-07	0.690943	0.682	0.544	0.00486199	1.83847e-15	0.717122	0.803	0.557	4.70391e-11	5.2234e-34	0.914846	0.741	0.489	1.33646e-29
RGCC	0.000855757	0.689592	3.34463e-08	0.754895	0.353	0.18	0.000855757	5.86689e-11	1.12117	0.294	0.142	1.5011e-06	7.13036e-09	0.689592	0.311	0.194	0.000182437
NUP43	0.00353157	0.689214	1.38028e-07	0.689214	0.538	0.341	0.00353157	5.3399e-15	0.903675	0.571	0.336	1.36627e-10	5.56436e-16	0.792545	0.474	0.292	1.4237e-11
SMC3	1.63188e-23	0.687515	6.37804e-28	0.863525	0.954	0.851	1.63188e-23	2.76064e-46	0.900336	0.975	0.863	7.06338e-42	4.52682e-38	0.687515	0.935	0.834	1.15823e-33
DHRS7B	3.11194e-06	0.687376	1.21627e-10	0.766303	0.723	0.494	3.11194e-06	1.57367e-13	0.687376	0.744	0.513	4.0264e-09	1.07216e-31	0.989264	0.68	0.434	2.74322e-27
NUP188	5.20001e-06	0.687235	2.03236e-10	0.897808	0.613	0.396	5.20001e-06	2.23746e-11	0.712123	0.626	0.418	5.72477e-07	1.88329e-15	0.687235	0.57	0.392	4.81858e-11
ERLIN1	1.81799e-06	0.687048	7.1054e-11	0.759447	0.74	0.528	1.81799e-06	1.42895e-15	0.687048	0.765	0.529	3.65612e-11	3.27776e-40	0.918147	0.785	0.515	8.38648e-36
RNF168	4.67686e-06	0.686514	9.8561e-21	1.03767	0.803	0.515	2.52178e-16	1.8279e-10	0.686514	0.706	0.526	4.67686e-06	2.59272e-41	1.04398	0.755	0.49	6.63373e-37
PMS1	6.69483e-11	0.686418	3.83809e-16	0.805417	0.855	0.658	9.82015e-12	2.6166e-15	0.686418	0.832	0.676	6.69483e-11	1.54788e-37	0.734657	0.921	0.758	3.9604e-33
LRMDA	0.0324375	0.686411	1.26778e-06	0.687188	0.457	0.285	0.0324375	4.31047e-10	0.686411	0.567	0.37	1.10288e-05	4.67593e-17	0.758856	0.442	0.255	1.19638e-12
MAD2L2	0.00692531	0.684025	3.0259e-13	1.10549	0.451	0.215	7.74206e-09	1.80807e-08	0.867449	0.378	0.224	0.000462613	2.70668e-07	0.684025	0.304	0.202	0.00692531
EXOSC2	0.0048188	0.683776	1.88337e-07	0.683776	0.561	0.369	0.0048188	2.90462e-13	0.752999	0.622	0.393	7.43177e-09	1.37013e-21	0.835323	0.596	0.379	3.50561e-17
PARP1	7.00673e-29	0.682518	2.7385e-33	0.904332	0.977	0.828	7.00673e-29	2.91651e-34	0.812657	0.975	0.839	7.46218e-30	2.75501e-37	0.682518	0.932	0.827	7.04898e-33
BAZ1B	3.43525e-27	0.682315	1.34263e-31	0.877594	0.983	0.861	3.43525e-27	2.90296e-36	0.826018	0.971	0.867	7.42752e-32	5.4223e-44	0.682315	0.974	0.856	1.38735e-39
SFXN1	6.47734e-11	0.682305	2.5316e-15	0.697475	0.913	0.769	6.47734e-11	7.71905e-24	0.736954	0.937	0.763	1.975e-19	1.02703e-29	0.682305	0.904	0.756	2.62776e-25
RBFA	6.3891e-05	0.68	2.49711e-09	0.73617	0.601	0.382	6.3891e-05	9.7804e-12	0.68	0.622	0.397	2.50241e-07	1.29915e-14	0.691349	0.523	0.345	3.32402e-10
TTL	7.78568e-05	0.679485	3.04294e-09	0.730566	0.566	0.333	7.78568e-05	2.822e-12	0.679485	0.63	0.402	7.22038e-08	6.70424e-22	0.705736	0.687	0.459	1.71535e-17
ELF4	0.0295934	0.678508	1.15662e-06	0.753417	0.497	0.326	0.0295934	6.87926e-08	0.678508	0.475	0.312	0.00176013	3.90638e-14	0.825316	0.444	0.279	9.99487e-10
SLC25A40	0.00109684	0.678351	4.28687e-08	0.678351	0.647	0.438	0.00109684	6.47866e-12	0.81137	0.609	0.421	1.65763e-07	2.8415e-30	1.07035	0.61	0.355	7.27025e-26
FADS1	0.000166827	0.678338	6.52026e-09	0.678338	0.763	0.589	0.000166827	5.06916e-27	0.967691	0.849	0.598	1.29699e-22	2.91118e-25	0.726371	0.785	0.576	7.44855e-21
EXOSC5	6.28035e-05	0.678186	2.4546e-09	0.7663	0.572	0.362	6.28035e-05	9.2545e-10	0.688484	0.559	0.369	2.36786e-05	2.86946e-12	0.678186	0.47	0.316	7.34181e-08
CMTM1	0.00120514	0.6771	4.71017e-08	0.6771	0.595	0.39	0.00120514	4.48233e-09	0.699677	0.555	0.381	0.000114685	5.21468e-20	0.889521	0.537	0.34	1.33423e-15
PDE3B	9.78258e-07	0.675434	3.82341e-11	0.986207	0.364	0.164	9.78258e-07	1.07947e-11	1.04587	0.357	0.18	2.76194e-07	6.94312e-13	0.675434	0.348	0.196	1.77647e-08
SPATA5	5.66103e-18	0.671318	2.21255e-22	0.82216	0.96	0.751	5.66103e-18	1.81631e-31	0.871999	0.945	0.773	4.64721e-27	1.97484e-29	0.671318	0.921	0.767	5.05283e-25
PAICS	1.16311e-25	0.671144	4.54587e-30	0.898542	0.988	0.848	1.16311e-25	4.35082e-31	0.757879	0.987	0.866	1.1132e-26	5.24057e-39	0.671144	0.96	0.855	1.34085e-34
TADA2A	0.000204071	0.670396	7.97588e-09	0.693112	0.659	0.45	0.000204071	5.33894e-11	0.670396	0.681	0.473	1.36602e-06	8.24123e-22	0.800646	0.643	0.432	2.1086e-17
ZBTB8A	0.000202464	0.669443	5.30603e-11	0.80354	0.653	0.418	1.3576e-06	7.91308e-09	0.669443	0.609	0.427	0.000202464	1.93134e-22	0.762245	0.657	0.438	4.94153e-18
USP13	1.31177e-07	0.668371	1.26042e-13	0.808415	0.734	0.473	3.22491e-09	5.12691e-12	0.668371	0.723	0.501	1.31177e-07	2.01627e-25	0.727676	0.715	0.474	5.15882e-21
MIS18BP1	1.64112e-12	0.667874	6.41415e-17	0.695425	0.931	0.78	1.64112e-12	2.27444e-24	0.667874	0.941	0.762	5.81937e-20	1.42729e-48	0.756659	0.928	0.692	3.65187e-44
TNFAIP8	1.54802e-07	0.667388	6.05025e-12	0.751924	0.78	0.556	1.54802e-07	4.47592e-15	0.831779	0.761	0.529	1.14521e-10	1.13239e-19	0.667388	0.745	0.559	2.89733e-15
FBXO45	0.00184322	0.666795	7.20403e-08	0.666795	0.514	0.306	0.00184322	1.61347e-10	0.764881	0.521	0.327	4.12822e-06	1.02355e-14	0.75332	0.437	0.262	2.61886e-10
MOCOS	1.90854e-19	0.665439	7.45933e-24	0.829047	0.925	0.667	1.90854e-19	6.54997e-25	0.790165	0.903	0.725	1.67588e-20	1.1721e-29	0.665439	0.893	0.722	2.99893e-25
CPSF3	1.65674e-05	0.665364	9.75991e-13	0.80414	0.682	0.432	2.49717e-08	6.47519e-10	0.665364	0.647	0.473	1.65674e-05	2.4264e-20	0.727011	0.673	0.472	6.2082e-16
PTPDC1	0.0207832	0.664366	8.1229e-07	0.789293	0.462	0.296	0.0207832	2.28683e-15	0.925175	0.546	0.308	5.85108e-11	4.63859e-11	0.664366	0.477	0.321	1.18683e-06
GGA2	9.15838e-11	0.660986	3.57945e-15	0.817905	0.844	0.626	9.15838e-11	3.51013e-17	0.660986	0.866	0.652	8.98101e-13	4.89892e-27	0.70495	0.815	0.635	1.25344e-22
NMRAL1	5.45312e-06	0.660623	2.13129e-10	0.772168	0.665	0.465	5.45312e-06	1.99667e-12	0.660623	0.706	0.499	5.10868e-08	1.70136e-19	0.724273	0.647	0.439	4.35309e-15
PDSS1	9.46591e-07	0.65881	3.69964e-11	0.751568	0.734	0.516	9.46591e-07	1.27441e-12	0.65881	0.739	0.558	3.26072e-08	3.10034e-25	0.704285	0.736	0.484	7.93253e-21
MSH5	9.03569e-06	0.656735	3.5315e-10	0.659686	0.717	0.52	9.03569e-06	5.22865e-16	0.703033	0.819	0.561	1.3378e-11	1.85477e-23	0.656735	0.757	0.537	4.7456e-19
PXYLP1	0.00101826	0.656628	3.97977e-08	0.714529	0.543	0.33	0.00101826	1.09296e-08	0.656628	0.529	0.346	0.000279645	2.60569e-14	0.741216	0.502	0.327	6.66693e-10
TUBB	6.94863e-41	0.656241	3.78662e-50	1.33038	0.983	0.786	9.68845e-46	5.01322e-55	1.16221	0.962	0.771	1.28268e-50	2.71579e-45	0.656241	0.93	0.721	6.94863e-41
NUP35	0.000632034	0.655964	2.47023e-08	0.655964	0.595	0.381	0.000632034	1.02159e-13	0.735396	0.655	0.399	2.61383e-09	5.74887e-23	0.730629	0.68	0.449	1.47091e-18
OXR1	1.87468e-08	0.655624	7.32699e-13	0.655624	0.908	0.718	1.87468e-08	1.39219e-17	0.678925	0.882	0.688	3.56205e-13	4.99011e-48	0.951008	0.862	0.629	1.27677e-43
TUBG1	0.0192093	0.655154	7.09149e-14	1.12576	0.486	0.236	1.81443e-09	7.6357e-22	1.23012	0.496	0.228	1.95367e-17	7.50772e-07	0.655154	0.271	0.175	0.0192093
DGKH	1.07134e-11	0.653887	4.18723e-16	0.665364	0.96	0.85	1.07134e-11	1.50233e-21	0.719601	0.954	0.817	3.84387e-17	4.8916e-29	0.653887	0.935	0.831	1.25156e-24
PLAGL1	9.47893e-05	0.652863	3.70473e-09	0.652863	0.74	0.537	9.47893e-05	9.30293e-16	0.714766	0.782	0.55	2.38025e-11	1.16658e-28	0.745087	0.794	0.566	2.9848e-24
CPLANE1	0.0334431	0.650607	1.30709e-06	0.650607	0.676	0.534	0.0334431	4.57443e-17	0.823905	0.79	0.564	1.17041e-12	1.76599e-35	0.819731	0.874	0.651	4.51847e-31
CEP97	0.00739857	0.649513	2.89165e-07	0.698956	0.486	0.3	0.00739857	3.0956e-10	0.768534	0.5	0.314	7.9204e-06	3.72893e-10	0.649513	0.416	0.276	9.54084e-06
PDE7A	4.55444e-06	0.648472	1.78005e-10	0.648472	0.821	0.607	4.55444e-06	3.52202e-14	0.713831	0.769	0.6	9.01145e-10	2.82771e-29	0.821846	0.813	0.598	7.23498e-25
NOM1	0.00159843	0.648129	6.24729e-08	0.648129	0.671	0.472	0.00159843	3.1998e-12	0.649837	0.727	0.523	8.18702e-08	6.26462e-21	0.6855	0.703	0.492	1.60286e-16
AC025154.2	0.000627583	0.648092	2.45284e-08	0.701528	0.532	0.329	0.000627583	2.0892e-12	0.83658	0.521	0.304	5.34542e-08	3.92538e-10	0.648092	0.409	0.27	1.00435e-05
STMN1	2.19426e-25	0.647754	8.57602e-30	0.839499	0.867	0.499	2.19426e-25	2.41926e-33	0.647754	0.874	0.564	6.18992e-29	2.00644e-46	0.661161	0.876	0.573	5.13368e-42
KLHL42	3.16194e-06	0.647396	1.23581e-10	0.647396	0.85	0.715	3.16194e-06	3.22283e-23	0.80096	0.87	0.739	8.24594e-19	2.21862e-30	0.648114	0.9	0.759	5.67656e-26
NUP153	4.80857e-09	0.647353	1.87938e-13	0.647353	0.908	0.753	4.80857e-09	1.41143e-20	0.76383	0.887	0.767	3.61129e-16	1.15989e-27	0.695766	0.9	0.767	2.9677e-23
TACC1	7.06645e-09	0.645203	2.76184e-13	0.839832	0.78	0.536	7.06645e-09	2.42315e-18	0.75443	0.79	0.526	6.19986e-14	1.11041e-20	0.645203	0.787	0.584	2.8411e-16
H2AFY2	8.46123e-07	0.643401	3.30698e-11	0.670955	0.705	0.443	8.46123e-07	5.15856e-14	0.741581	0.668	0.428	1.31987e-09	2.99369e-18	0.643401	0.673	0.46	7.65965e-14
ADARB1	0.000653732	0.641986	1.47576e-15	1.03062	0.665	0.393	3.77589e-11	2.55504e-08	0.641986	0.592	0.416	0.000653732	1.02088e-14	0.677602	0.577	0.397	2.61201e-10
PHF19	1.11704e-05	0.63946	1.01683e-13	0.824991	0.584	0.302	2.60166e-09	1.12864e-20	1.06118	0.567	0.289	2.88775e-16	4.36582e-10	0.63946	0.4	0.263	1.11704e-05
PAXX	0.0126102	0.638715	4.92856e-07	0.638715	0.642	0.478	0.0126102	3.86625e-19	0.862879	0.735	0.493	9.89219e-15	1.58712e-18	0.665283	0.673	0.481	4.06081e-14
TANC2	6.59566e-05	0.637772	2.57784e-09	0.723116	0.561	0.334	6.59566e-05	2.04841e-10	0.676046	0.542	0.336	5.24105e-06	2.5939e-19	0.637772	0.664	0.441	6.63675e-15
CD3EAP	2.92109e-05	0.634933	3.11224e-13	1.1004	0.561	0.317	7.96298e-09	1.14167e-09	0.634933	0.584	0.378	2.92109e-05	5.84514e-14	0.651136	0.505	0.327	1.49554e-09
LYRM7	0.00433723	0.634635	1.69516e-07	0.656306	0.572	0.377	0.00433723	8.01852e-10	0.653303	0.58	0.386	2.05162e-05	5.7581e-10	0.634635	0.463	0.329	1.47327e-05
WNK2	3.23605e-10	0.633899	1.26478e-14	0.856601	0.653	0.364	3.23605e-10	2.33926e-15	0.851838	0.681	0.437	5.98523e-11	3.36302e-16	0.633899	0.682	0.489	8.60462e-12
ASAP1	5.46565e-12	0.633868	6.53096e-17	0.769307	0.896	0.789	1.67101e-12	2.13619e-16	0.633868	0.933	0.814	5.46565e-12	5.4754e-41	0.72332	0.963	0.814	1.40094e-36
ZNF107	0.00601418	0.632631	2.35058e-07	0.632631	0.595	0.396	0.00601418	1.28272e-13	0.77414	0.618	0.388	3.28197e-09	7.29308e-25	0.878426	0.579	0.341	1.86601e-20
HSPA14.1	0.0411906	0.631692	1.60989e-06	0.631692	0.578	0.408	0.0411906	6.28963e-19	0.913001	0.664	0.377	1.60927e-14	3.17493e-20	0.842728	0.516	0.309	8.12338e-16
LONRF1	1.14593e-08	0.63095	7.52471e-16	1.16378	0.618	0.349	1.92527e-11	4.47873e-13	0.751488	0.622	0.39	1.14593e-08	7.59569e-17	0.63095	0.6	0.389	1.94343e-12
MMD	0.000979082	0.630762	3.82663e-08	0.667222	0.526	0.319	0.000979082	8.23884e-12	0.742928	0.521	0.301	2.10799e-07	1.3293e-11	0.630762	0.442	0.286	3.40114e-07
PRC1	8.2101e-36	0.629477	3.20882e-40	1.0643	0.578	0.166	8.2101e-36	2.65562e-53	0.763207	0.66	0.2	6.79468e-49	1.29198e-61	0.629477	0.603	0.215	3.30566e-57
RGS3	0.00208926	0.629018	8.16562e-08	0.676859	0.642	0.464	0.00208926	5.37021e-13	0.629018	0.676	0.437	1.37402e-08	1.96404e-25	0.720909	0.643	0.397	5.0252e-21
CDCA2	3.33525e-32	0.628303	1.30354e-36	1.08872	0.422	0.099	3.33525e-32	2.86182e-53	0.943451	0.492	0.118	7.32225e-49	4.44313e-50	0.628303	0.407	0.122	1.13682e-45
SLC25A28	0.000250662	0.628268	1.41877e-09	0.826108	0.503	0.288	3.63005e-05	1.93766e-11	0.821877	0.492	0.29	4.9577e-07	9.79686e-09	0.628268	0.355	0.234	0.000250662
PCNT	0.000299628	0.627334	1.17106e-08	0.627334	0.717	0.494	0.000299628	5.69154e-17	0.829733	0.723	0.48	1.45624e-12	6.23128e-32	0.887398	0.699	0.431	1.59433e-27
GART	6.71079e-15	0.626215	2.99209e-20	0.783462	0.931	0.766	7.65556e-16	2.62283e-19	0.626215	0.958	0.806	6.71079e-15	3.24862e-30	0.675048	0.921	0.776	8.31192e-26
KPNB1	4.35785e-36	0.624603	1.70322e-40	0.840618	0.994	0.97	4.35785e-36	5.60524e-51	0.768379	1	0.975	1.43416e-46	1.6382e-56	0.624603	0.991	0.968	4.19149e-52
FRMD6	0.0120973	0.622322	2.5219e-07	0.887464	0.341	0.18	0.00645254	1.08501e-11	1.00466	0.345	0.169	2.77611e-07	4.72808e-07	0.622322	0.276	0.178	0.0120973
ARNT2	0.0157045	0.621581	6.13791e-07	0.621581	0.613	0.416	0.0157045	2.1136e-11	0.665399	0.655	0.437	5.40785e-07	2.16314e-21	0.697573	0.713	0.492	5.53462e-17
IQCB1	7.10231e-12	0.621223	2.77586e-16	0.621223	0.96	0.896	7.10231e-12	4.77868e-22	0.669558	0.979	0.895	1.22267e-17	4.5016e-46	0.677924	0.993	0.909	1.15178e-41
PODXL2	0.000718089	0.618154	8.65891e-10	0.68451	0.601	0.353	2.21547e-05	2.80657e-08	0.618154	0.55	0.377	0.000718089	6.9025e-12	0.675158	0.458	0.304	1.76607e-07
PRRG4	0.000292057	0.617707	1.14147e-08	0.617707	0.78	0.657	0.000292057	4.11038e-24	0.834444	0.882	0.616	1.05168e-19	6.64073e-24	0.680562	0.78	0.551	1.6991e-19
TMEM243	0.000141942	0.616758	5.54763e-09	0.671858	0.688	0.48	0.000141942	2.04923e-28	1.05027	0.777	0.434	5.24316e-24	2.70125e-13	0.616758	0.556	0.381	6.91141e-09
KNL1	3.5254e-33	0.616597	1.37786e-37	1.17138	0.561	0.167	3.5254e-33	3.88231e-54	0.940335	0.634	0.191	9.93328e-50	1.16553e-47	0.616597	0.533	0.205	2.98212e-43
RB1	4.41905e-06	0.615831	1.72713e-10	0.615831	0.89	0.772	4.41905e-06	3.82148e-19	0.729189	0.908	0.752	9.77763e-15	8.45269e-30	0.696768	0.886	0.713	2.1627e-25
GSTCD	0.000382749	0.615006	1.49593e-08	0.615006	0.769	0.574	0.000382749	3.24154e-16	0.69594	0.832	0.584	8.29381e-12	1.48119e-32	0.800791	0.801	0.531	3.78977e-28
DCAF15	0.00021467	0.614284	8.39014e-09	0.726634	0.549	0.332	0.00021467	1.11649e-14	0.858972	0.542	0.3	2.85666e-10	1.83981e-09	0.614284	0.395	0.264	4.70735e-05
SNRPB	0.00083482	0.613312	3.2628e-08	0.613312	0.89	0.812	0.00083482	1.13191e-20	0.794902	0.937	0.824	2.8961e-16	1.467e-39	0.743827	0.956	0.887	3.75346e-35
SMCO4	0.000167291	0.612642	6.53838e-09	0.612642	0.711	0.488	0.000167291	4.56869e-27	1.02782	0.765	0.46	1.16895e-22	3.91989e-36	1.00389	0.668	0.388	1.00294e-31
SKA2	1.88767e-09	0.612603	7.37775e-14	0.698902	0.827	0.607	1.88767e-09	4.00443e-14	0.612603	0.853	0.618	1.02457e-09	1.82607e-27	0.670081	0.85	0.614	4.67218e-23
UMPS	0.000123688	0.609628	4.83422e-09	0.640694	0.688	0.503	0.000123688	1.328e-10	0.628761	0.723	0.514	3.39782e-06	5.78644e-15	0.609628	0.638	0.467	1.48052e-10
SRD5A1	4.35954e-08	0.609374	2.52173e-14	0.801073	0.821	0.606	6.45211e-10	1.70388e-12	0.609374	0.807	0.628	4.35954e-08	1.67907e-31	0.797513	0.813	0.58	4.29607e-27
ABHD5	0.000422881	0.608252	1.65278e-08	0.771581	0.613	0.422	0.000422881	7.47536e-14	0.722607	0.664	0.423	1.91265e-09	3.34775e-12	0.608252	0.484	0.315	8.56556e-08
TRAP1	1.044e-13	0.608241	9.82757e-20	0.811959	0.936	0.76	2.51448e-15	4.08037e-18	0.657015	0.912	0.795	1.044e-13	4.9774e-25	0.608241	0.911	0.771	1.27352e-20
C2CD3	0.0354012	0.606757	1.38361e-06	0.618701	0.636	0.461	0.0354012	9.78573e-14	0.663672	0.697	0.466	2.50378e-09	4.07856e-14	0.606757	0.6	0.419	1.04354e-09
ING2	0.0124095	0.606641	4.8501e-07	0.606641	0.572	0.378	0.0124095	7.81719e-14	0.812083	0.571	0.342	2.00011e-09	2.35753e-19	0.782931	0.498	0.287	6.03198e-15
JPT2	1.73425e-05	0.604624	6.77811e-10	0.623248	0.798	0.634	1.73425e-05	4.41599e-12	0.604624	0.79	0.637	1.12987e-07	1.17473e-21	0.63916	0.785	0.596	3.00567e-17
CELF2	0.000919049	0.604539	3.592e-08	0.792298	0.503	0.309	0.000919049	4.21529e-11	0.72922	0.576	0.359	1.07853e-06	3.71997e-15	0.604539	0.561	0.367	9.51791e-11
LAS1L	0.0264846	0.604307	5.26139e-08	0.731599	0.509	0.315	0.00134618	1.03512e-06	0.604307	0.5	0.352	0.0264846	1.38857e-11	0.627693	0.474	0.317	3.55279e-07
PSMG1	1.28473e-06	0.604006	3.01364e-17	0.959147	0.711	0.413	7.71071e-13	8.0598e-12	0.653664	0.672	0.451	2.06218e-07	5.02122e-11	0.604006	0.505	0.356	1.28473e-06
MBOAT2	0.00352081	0.603664	1.37607e-07	0.603664	0.694	0.514	0.00352081	2.00848e-16	0.688813	0.79	0.54	5.1389e-12	4.19056e-27	0.625951	0.883	0.677	1.0722e-22
UBA2	3.08255e-21	0.603443	1.20478e-25	0.723156	0.965	0.894	3.08255e-21	4.7185e-30	0.682932	0.975	0.89	1.20728e-25	7.03833e-36	0.603443	0.977	0.868	1.80083e-31
PLCE1	0.00616651	0.600633	2.41011e-07	0.600633	0.74	0.597	0.00616651	3.23217e-17	0.755867	0.803	0.596	8.26984e-13	2.45565e-29	0.96346	0.619	0.365	6.28304e-25
C20orf27	0.0193411	0.597172	7.55925e-07	0.715921	0.52	0.35	0.0193411	9.51442e-11	0.766131	0.567	0.371	2.43436e-06	3.7936e-14	0.597172	0.629	0.453	9.70631e-10
NUSAP1	3.48515e-29	0.596191	2.01825e-53	1.11716	0.734	0.22	5.16389e-49	1.36213e-33	0.673286	0.601	0.24	3.48515e-29	1.36538e-56	0.596191	0.617	0.244	3.49346e-52
C1orf159	0.0154445	0.595906	6.03633e-07	0.62941	0.618	0.435	0.0154445	1.41155e-08	0.595906	0.643	0.46	0.00036116	1.5102e-12	0.63212	0.558	0.393	3.86401e-08
URB2	2.73145e-05	0.593905	2.29781e-11	0.875662	0.549	0.305	5.87917e-07	2.35807e-11	0.713962	0.542	0.33	6.03335e-07	1.06756e-09	0.593905	0.451	0.31	2.73145e-05
PIGX	0.000642757	0.593351	2.51214e-08	0.593351	0.746	0.577	0.000642757	6.53714e-21	0.837673	0.824	0.575	1.67259e-16	1.32078e-22	0.764692	0.696	0.496	3.37934e-18
HACD3	5.88542e-16	0.592923	3.77511e-25	0.814334	0.977	0.858	9.65899e-21	2.30025e-20	0.592923	0.954	0.88	5.88542e-16	2.82346e-34	0.623586	0.96	0.866	7.22411e-30
HS6ST1	0.00108724	0.590612	1.31726e-11	0.993191	0.48	0.254	3.37034e-07	4.24934e-08	0.770835	0.416	0.255	0.00108724	1.00225e-09	0.590612	0.381	0.245	2.56436e-05
PNKP	0.00352081	0.590539	9.99364e-08	0.693052	0.578	0.382	0.00255697	1.37607e-07	0.590539	0.567	0.408	0.00352081	6.9649e-18	0.787379	0.563	0.372	1.78204e-13
ULK2	0.000739922	0.59005	1.52952e-10	0.880426	0.653	0.424	3.91344e-06	2.8919e-08	0.59005	0.622	0.446	0.000739922	1.15633e-18	0.711171	0.689	0.476	2.95858e-14
PRKD3	3.22497e-06	0.590047	1.26044e-10	0.723013	0.798	0.598	3.22497e-06	1.80202e-14	0.702084	0.79	0.58	4.61066e-10	9.8538e-20	0.590047	0.804	0.606	2.52119e-15
MAP3K20	7.72453e-09	0.589803	3.01905e-13	0.589803	0.931	0.684	7.72453e-09	8.39266e-24	0.773209	0.916	0.733	2.14735e-19	3.93976e-44	0.696513	0.97	0.852	1.00803e-39
CSNK1G1	8.42469e-06	0.588064	3.29269e-10	0.659166	0.908	0.816	8.42469e-06	1.26872e-10	0.674211	0.87	0.804	3.24616e-06	3.37781e-13	0.588064	0.86	0.791	8.64247e-09
JADE1	0.0173354	0.587858	6.77535e-07	0.712242	0.514	0.342	0.0173354	9.39905e-12	0.7183	0.567	0.35	2.40484e-07	7.00745e-13	0.587858	0.523	0.351	1.79293e-08
TUBA1B	9.66287e-58	0.587464	3.77662e-62	1.36876	1	0.8	9.66287e-58	8.45403e-63	1.0278	0.971	0.776	2.16305e-58	4.7897e-77	0.587464	0.953	0.716	1.22549e-72
B4GALT6	1.90971e-05	0.585868	7.46388e-10	0.86072	0.647	0.448	1.90971e-05	2.92338e-11	0.678505	0.672	0.472	7.47977e-07	1.09014e-17	0.585868	0.657	0.444	2.78923e-13
CDK5RAP2	3.40271e-05	0.583685	1.32991e-09	0.583685	0.775	0.619	3.40271e-05	5.48342e-21	0.723458	0.857	0.621	1.40299e-16	4.17651e-27	0.590104	0.862	0.653	1.0686e-22
NME4	3.40191e-08	0.583473	1.56179e-15	0.942894	0.74	0.526	3.996e-11	5.13012e-20	0.924749	0.761	0.516	1.31259e-15	1.3296e-12	0.583473	0.64	0.48	3.40191e-08
SLC39A8	1.87727e-05	0.582983	7.33708e-10	0.582983	0.746	0.491	1.87727e-05	4.08144e-11	0.584065	0.71	0.522	1.04428e-06	2.34296e-24	0.706081	0.701	0.454	5.99469e-20
POLD2	1.54626e-07	0.578563	6.04337e-12	0.646097	0.838	0.668	1.54626e-07	2.05964e-13	0.597813	0.84	0.668	5.2698e-09	1.07392e-19	0.578563	0.78	0.585	2.74774e-15
BICDL1	4.22016e-07	0.578408	1.6494e-11	0.642859	0.896	0.784	4.22016e-07	1.848e-14	0.578408	0.924	0.785	4.72828e-10	4.41224e-32	0.697935	0.928	0.789	1.12892e-27
SLC20A1	2.67091e-15	0.577603	1.04389e-19	0.776097	0.908	0.711	2.67091e-15	4.64413e-21	0.748915	0.899	0.738	1.18825e-16	5.38617e-31	0.577603	0.937	0.787	1.37811e-26
IPO5	1.72191e-14	0.575567	6.72988e-19	0.712135	0.954	0.821	1.72191e-14	9.30564e-20	0.598729	0.95	0.831	2.38094e-15	1.50504e-28	0.575567	0.946	0.815	3.85079e-24
STX2	1.30778e-06	0.575215	5.7513e-12	1.0895	0.509	0.281	1.47153e-07	5.08246e-13	0.796365	0.559	0.338	1.3004e-08	5.11131e-11	0.575215	0.57	0.417	1.30778e-06
MBD4	0.00913024	0.573308	3.56845e-07	0.614337	0.699	0.519	0.00913024	2.43183e-09	0.573308	0.71	0.519	6.22208e-05	2.96525e-14	0.616526	0.621	0.449	7.58689e-10
ENOSF1	6.22105e-11	0.571697	2.43143e-15	0.625533	0.96	0.858	6.22105e-11	7.96176e-20	0.571697	0.971	0.89	2.03709e-15	1.03323e-45	0.693129	0.963	0.882	2.64362e-41
HMGB2	9.05348e-27	0.571603	3.53845e-31	0.765647	0.838	0.486	9.05348e-27	1.59331e-42	0.66306	0.882	0.528	4.07665e-38	4.02339e-62	0.571603	0.839	0.466	1.02943e-57
PGAM5	0.000232694	0.571193	2.53432e-14	0.89437	0.642	0.358	6.48432e-10	9.09457e-09	0.642561	0.534	0.355	0.000232694	1.84477e-09	0.571193	0.453	0.317	4.72003e-05
NOLC1	1.40313e-13	0.570785	5.02115e-23	0.875956	0.954	0.767	1.28471e-18	5.48399e-18	0.618185	0.937	0.8	1.40313e-13	9.75578e-23	0.570785	0.883	0.756	2.49611e-18
TPRKB	0.00803821	0.569382	3.14164e-07	0.603092	0.682	0.515	0.00803821	1.32085e-15	0.699723	0.761	0.536	3.37953e-11	6.94963e-13	0.569382	0.652	0.493	1.77813e-08
UBASH3B	1.09881e-08	0.565593	3.39627e-17	0.882891	0.832	0.575	8.6897e-13	4.29459e-13	0.679477	0.79	0.576	1.09881e-08	1.20018e-20	0.565593	0.832	0.616	3.07077e-16
NUDCD1	0.00441959	0.565015	1.40379e-10	0.809995	0.688	0.458	3.59173e-06	1.72735e-07	0.613875	0.643	0.49	0.00441959	1.3351e-14	0.565015	0.636	0.437	3.416e-10
GAD1	0.00740486	0.564988	2.89411e-07	0.70936	0.561	0.35	0.00740486	2.03348e-07	0.564988	0.542	0.383	0.00520287	4.92907e-19	0.601297	0.647	0.437	1.26115e-14
CCM2	0.0029945	0.564811	1.17037e-07	0.566887	0.734	0.581	0.0029945	1.83888e-10	0.564811	0.782	0.582	4.70496e-06	7.24021e-18	0.571268	0.736	0.528	1.85248e-13
CARHSP1	1.89584e-05	0.564413	7.40968e-10	0.564413	0.867	0.763	1.89584e-05	8.47666e-16	0.677615	0.861	0.714	2.16884e-11	2.16451e-19	0.619094	0.804	0.649	5.53811e-15
UHRF2	0.000102479	0.564083	4.00528e-09	0.598537	0.855	0.711	0.000102479	2.89758e-13	0.603443	0.861	0.701	7.41376e-09	1.14014e-18	0.564083	0.82	0.662	2.91716e-14
H2AFZ	1.08377e-24	0.564028	4.23579e-29	0.873348	0.988	0.891	1.08377e-24	3.49889e-30	0.687614	0.987	0.919	8.95225e-26	2.81415e-34	0.564028	0.956	0.894	7.20028e-30
METTL21A	0.0218502	0.562009	8.5399e-07	0.691328	0.543	0.367	0.0218502	2.06982e-08	0.712655	0.521	0.35	0.000529583	6.64097e-09	0.562009	0.558	0.44	0.000169916
PNP	0.0196326	0.559468	7.67318e-07	0.559468	0.746	0.574	0.0196326	1.78258e-15	0.765062	0.756	0.556	4.5609e-11	1.10945e-13	0.631866	0.575	0.415	2.83863e-09
ADAM15	1.13419e-05	0.559112	3.02612e-11	0.80942	0.699	0.472	7.74262e-07	3.22698e-17	0.896317	0.685	0.433	8.25655e-13	4.43284e-10	0.559112	0.544	0.406	1.13419e-05
DTYMK	4.97311e-18	0.55791	1.94368e-22	0.960279	0.78	0.452	4.97311e-18	1.62088e-26	0.762796	0.807	0.488	4.14718e-22	2.60777e-26	0.55791	0.78	0.542	6.67223e-22
ZDHHC6	0.000360953	0.557013	8.44003e-10	0.780412	0.659	0.459	2.15947e-05	1.41074e-08	0.557013	0.626	0.458	0.000360953	1.57274e-11	0.571175	0.53	0.371	4.02401e-07
MRPL37	2.56704e-06	0.555229	2.2817e-11	0.690045	0.751	0.53	5.83795e-07	1.0033e-10	0.614632	0.723	0.53	2.56704e-06	2.54413e-13	0.555229	0.631	0.471	6.5094e-09
KMT5A	1.64214e-09	0.555226	6.41813e-14	0.624229	0.919	0.688	1.64214e-09	3.17506e-15	0.579478	0.874	0.692	8.1237e-11	2.54616e-20	0.555226	0.801	0.614	6.5146e-16
PCBP3	0.00184501	0.552318	2.5924e-08	0.569957	0.607	0.375	0.000663291	7.21103e-08	0.552318	0.534	0.356	0.00184501	4.79129e-29	1.00575	0.603	0.354	1.2259e-24
DCLRE1C	0.000627215	0.551884	2.4514e-08	0.577016	0.659	0.456	0.000627215	1.52866e-10	0.658333	0.626	0.427	3.91123e-06	2.53702e-15	0.551884	0.6	0.395	6.49121e-11
TUBGCP4	0.00804534	0.551682	3.14443e-07	0.551682	0.74	0.59	0.00804534	3.28307e-13	0.593037	0.803	0.602	8.40005e-09	1.29242e-22	0.674671	0.773	0.553	3.30679e-18
C1orf35	0.000100987	0.551365	2.3432e-10	0.705054	0.676	0.447	5.9953e-06	3.94695e-09	0.551365	0.66	0.47	0.000100987	1.62873e-11	0.576717	0.584	0.427	4.16727e-07
ANKRD36B	0.0303791	0.5482	1.18733e-06	0.643026	0.572	0.406	0.0303791	1.40724e-08	0.5482	0.588	0.394	0.000360057	5.75965e-26	0.81567	0.741	0.511	1.47366e-21
WWOX	0.0004421	0.54697	1.7279e-08	0.54697	0.855	0.678	0.0004421	2.17888e-14	0.589722	0.962	0.795	5.57488e-10	1.11518e-29	0.736237	0.939	0.837	2.85331e-25
MACROD1	0.0385138	0.546424	1.50527e-06	0.546424	0.682	0.521	0.0385138	1.92549e-10	0.65239	0.702	0.529	4.92657e-06	6.16642e-16	0.670462	0.647	0.474	1.57774e-11
C15orf41	0.00585773	0.545635	7.30142e-10	0.853118	0.538	0.317	1.86814e-05	2.28943e-07	0.618853	0.529	0.366	0.00585773	1.0457e-14	0.545635	0.614	0.41	2.67554e-10
MRPS26	0.000645353	0.544156	2.52229e-08	0.544156	0.821	0.667	0.000645353	4.36846e-12	0.574687	0.849	0.721	1.11771e-07	1.00556e-21	0.588946	0.879	0.767	2.57282e-17
SLC7A5	0.000531095	0.544144	2.07573e-08	0.665427	0.728	0.546	0.000531095	4.58911e-13	0.612674	0.836	0.635	1.17417e-08	2.07127e-21	0.544144	0.893	0.739	5.29955e-17
ASIC1	0.00191877	0.543231	2.44284e-13	0.86798	0.653	0.386	6.25024e-09	7.4993e-08	0.543231	0.576	0.4	0.00191877	1.04626e-15	0.617664	0.577	0.372	2.67697e-11
SVIP	8.13567e-08	0.54204	3.17973e-12	0.54204	0.913	0.767	8.13567e-08	9.08915e-21	0.707095	0.924	0.745	2.32555e-16	2.28776e-19	0.571241	0.839	0.688	5.85347e-15
SCML1	0.00173481	0.540978	6.78031e-08	0.540978	0.78	0.592	0.00173481	2.33592e-14	0.719827	0.794	0.571	5.97668e-10	4.10711e-25	0.695547	0.743	0.481	1.05084e-20
TOMM40	3.0516e-05	0.54017	1.19268e-09	0.645735	0.751	0.532	3.0516e-05	1.30546e-20	0.710752	0.861	0.589	3.34014e-16	2.19954e-15	0.54017	0.71	0.529	5.62776e-11
VDR	0.000578665	0.538404	2.26165e-08	0.596519	0.723	0.529	0.000578665	2.1716e-11	0.635599	0.723	0.505	5.55626e-07	1.10582e-13	0.538404	0.65	0.473	2.82934e-09
NAA50	2.16073e-10	0.536876	8.44497e-15	0.557696	0.983	0.896	2.16073e-10	4.97591e-22	0.560065	0.979	0.913	1.27314e-17	9.39787e-29	0.536876	0.953	0.882	2.40454e-24
WDR5	0.00842158	0.536657	2.73995e-13	0.855977	0.665	0.399	7.01044e-09	3.29148e-07	0.536657	0.597	0.421	0.00842158	1.43909e-14	0.670889	0.558	0.384	3.68207e-10
PI4K2B	0.0388024	0.536541	1.51655e-06	0.543019	0.711	0.574	0.0388024	6.96604e-11	0.586476	0.773	0.592	1.78233e-06	4.72808e-12	0.536541	0.645	0.489	1.20973e-07
WRN	1.11331e-08	0.536232	1.09485e-14	0.671248	0.925	0.818	2.80129e-10	4.35125e-13	0.536232	0.92	0.824	1.11331e-08	2.44424e-22	0.549979	0.935	0.84	6.25383e-18
NUP50-DT	0.000813911	0.535553	3.18108e-08	0.581345	0.792	0.606	0.000813911	1.59032e-09	0.565486	0.782	0.625	4.06898e-05	2.0142e-17	0.535553	0.822	0.64	5.15353e-13
PRR5L	0.0335429	0.535073	1.31099e-06	0.827079	0.37	0.213	0.0335429	1.24294e-07	0.72567	0.336	0.191	0.00318018	2.72362e-07	0.535073	0.346	0.233	0.00696864
TBCD	1.5293e-10	0.534279	6.13834e-16	0.94959	0.809	0.584	1.57055e-11	5.97711e-15	0.640561	0.819	0.616	1.5293e-10	7.19892e-19	0.534279	0.792	0.603	1.84192e-14
PHF5A	0.0134507	0.533685	4.99103e-07	0.66626	0.595	0.42	0.0127701	5.25705e-07	0.533685	0.58	0.423	0.0134507	5.00591e-12	0.759843	0.451	0.309	1.28081e-07
NUP54	3.62969e-06	0.533321	9.22704e-14	0.680847	0.896	0.75	2.36083e-09	1.41863e-10	0.533321	0.866	0.761	3.62969e-06	4.21118e-30	0.677025	0.883	0.722	1.07747e-25
POLR2D	0.00176754	0.530297	6.90822e-08	0.663426	0.659	0.452	0.00176754	2.03313e-13	0.716574	0.681	0.451	5.20196e-09	1.1351e-10	0.530297	0.645	0.509	2.90427e-06
INTS7	7.75155e-05	0.528331	3.02961e-09	0.528331	0.931	0.794	7.75155e-05	1.81144e-16	0.559456	0.933	0.808	4.63475e-12	1.88756e-28	0.605803	0.93	0.812	4.82952e-24
ORAI1	0.00420594	0.527647	2.47861e-08	0.679886	0.607	0.407	0.000634178	1.64384e-07	0.527647	0.576	0.398	0.00420594	7.40272e-19	0.763907	0.537	0.336	1.89406e-14
HADH	2.62341e-05	0.52652	1.02533e-09	0.554256	0.832	0.674	2.62341e-05	2.00791e-14	0.532772	0.908	0.7	5.13743e-10	4.07891e-14	0.52652	0.752	0.609	1.04363e-09
ELOVL7	0.0230419	0.526037	9.00568e-07	0.535124	0.723	0.54	0.0230419	9.34389e-09	0.526037	0.718	0.549	0.000239073	1.05869e-13	0.532058	0.661	0.471	2.70876e-09
SLC9A2	7.53612e-05	0.525651	2.76879e-10	0.988579	0.451	0.241	7.08422e-06	2.94541e-09	0.641755	0.492	0.303	7.53612e-05	2.4159e-11	0.525651	0.456	0.295	6.18133e-07
RTEL1	0.012839	0.525569	5.01797e-07	0.787516	0.434	0.264	0.012839	4.64382e-07	0.578403	0.445	0.285	0.0118817	8.15712e-08	0.525569	0.416	0.292	0.00208708
ZNF678	0.00165251	0.524877	6.45864e-08	0.626116	0.682	0.469	0.00165251	4.69138e-10	0.524877	0.681	0.473	1.20034e-05	3.96503e-16	0.599272	0.661	0.455	1.01449e-11
FAF1	7.59407e-15	0.523979	2.96806e-19	0.523979	0.994	0.987	7.59407e-15	6.0961e-39	0.614852	0.996	0.993	1.55975e-34	7.54963e-54	0.585013	0.998	0.993	1.93165e-49
LSM3	4.18955e-11	0.522471	1.63744e-15	0.689289	0.925	0.772	4.18955e-11	3.61021e-17	0.593678	0.916	0.797	9.23709e-13	9.52762e-21	0.522471	0.864	0.715	2.43774e-16
ANO1	2.07862e-08	0.522402	8.12404e-13	0.876953	0.763	0.536	2.07862e-08	2.54266e-19	0.881904	0.815	0.597	6.50566e-15	1.40571e-15	0.522402	0.857	0.701	3.59664e-11
NPM3	0.00140858	0.522088	5.50527e-08	0.67841	0.59	0.396	0.00140858	3.01353e-10	0.619548	0.639	0.433	7.71041e-06	1.29847e-09	0.522088	0.556	0.418	3.32226e-05
NCR3LG1	0.000249132	0.520961	2.39902e-14	0.937395	0.595	0.322	6.13814e-10	1.414e-13	0.753881	0.613	0.368	3.61786e-09	9.73704e-09	0.520961	0.446	0.312	0.000249132
YEATS4	0.00414211	0.519701	1.6189e-07	0.519701	0.827	0.714	0.00414211	2.61559e-16	0.675663	0.866	0.727	6.69225e-12	5.37019e-34	0.744429	0.869	0.612	1.37402e-29
TSEN54	3.29675e-05	0.519638	1.2885e-09	0.660753	0.676	0.453	3.29675e-05	2.29064e-10	0.63851	0.643	0.447	5.86082e-06	9.32203e-10	0.519638	0.558	0.416	2.38513e-05
PALD1	0.000164149	0.518732	5.04416e-09	0.719878	0.509	0.291	0.00012906	6.41558e-09	0.613334	0.538	0.349	0.000164149	4.80095e-14	0.518732	0.645	0.454	1.22837e-09
VKORC1	0.022837	0.517928	1.8504e-12	0.818637	0.659	0.401	4.73445e-08	1.21124e-07	0.6305	0.567	0.416	0.00309908	8.92556e-07	0.517928	0.435	0.325	0.022837
PCSK6	0.0236063	0.517631	9.22624e-07	0.586025	0.699	0.558	0.0236063	1.43106e-09	0.517631	0.769	0.596	3.66152e-05	9.03293e-15	0.562525	0.706	0.535	2.31116e-10
PKD2	6.66468e-10	0.516805	2.92639e-16	0.674733	0.931	0.828	7.48745e-12	2.60482e-14	0.516805	0.945	0.831	6.66468e-10	9.57405e-26	0.562298	0.951	0.852	2.44962e-21
FUS	7.55291e-29	0.516696	2.95197e-33	0.637433	0.994	0.988	7.55291e-29	1.47367e-35	0.586318	0.996	0.991	3.77054e-31	1.1919e-47	0.516696	1	0.995	3.04961e-43
SIGMAR1	1.25086e-05	0.516411	7.88546e-13	0.870893	0.699	0.457	2.01757e-08	9.01303e-19	0.858308	0.723	0.482	2.30607e-14	4.88886e-10	0.516411	0.561	0.417	1.25086e-05
NAP1L4	1.54733e-13	0.515816	6.04756e-18	0.589741	0.988	0.927	1.54733e-13	7.71823e-23	0.555534	0.987	0.928	1.97479e-18	1.33604e-30	0.515816	0.981	0.923	3.41838e-26
PRPF4	0.0236638	0.514655	9.24872e-07	0.532174	0.676	0.503	0.0236638	1.41981e-08	0.514655	0.718	0.533	0.000363271	3.92111e-18	0.701343	0.657	0.468	1.00325e-13
FAM210A	0.00332303	0.514202	1.29877e-07	0.654673	0.642	0.46	0.00332303	1.91541e-09	0.617047	0.66	0.478	4.90077e-05	1.22235e-12	0.514202	0.598	0.425	3.1275e-08
PBK	7.74333e-12	0.513908	1.5644e-17	0.813482	0.283	0.081	4.00268e-13	4.16221e-33	1.00922	0.403	0.114	1.06494e-28	3.02639e-16	0.513908	0.266	0.118	7.74333e-12
SMPD4	5.66926e-06	0.513636	2.98575e-12	0.882612	0.642	0.398	7.63934e-08	2.21577e-10	0.69685	0.609	0.41	5.66926e-06	2.36862e-12	0.513636	0.647	0.479	6.06035e-08
NOP58	3.02001e-14	0.513621	7.38233e-20	0.617148	0.983	0.914	1.88884e-15	1.18034e-18	0.548589	0.975	0.922	3.02001e-14	1.98882e-36	0.513621	0.998	0.968	5.0886e-32
TBC1D4	1.34339e-07	0.511251	8.05372e-17	0.826108	0.884	0.649	2.06063e-12	5.2505e-12	0.512646	0.861	0.667	1.34339e-07	1.56574e-17	0.511251	0.832	0.645	4.00609e-13
MTR	0.00542476	0.511222	2.12021e-07	0.511222	0.798	0.691	0.00542476	6.29304e-11	0.518739	0.857	0.701	1.61014e-06	6.7627e-22	0.608386	0.827	0.658	1.73031e-17
BLMH	0.00622363	0.510716	2.92986e-09	0.695495	0.618	0.387	7.49634e-05	2.43244e-07	0.510716	0.588	0.418	0.00622363	8.77672e-13	0.553139	0.547	0.37	2.24561e-08
GALNT13	1.07052e-05	0.510429	4.184e-10	0.510429	0.931	0.849	1.07052e-05	2.86373e-16	0.609771	0.954	0.843	7.32715e-12	2.18976e-22	0.576357	0.939	0.807	5.60271e-18
SPECC1	3.12756e-05	0.510326	6.28917e-14	0.804099	0.827	0.637	1.60915e-09	1.22237e-09	0.510326	0.828	0.645	3.12756e-05	9.85457e-20	0.608684	0.834	0.675	2.52139e-15
HES6	4.08057e-06	0.505358	1.59485e-10	0.898681	0.607	0.382	4.08057e-06	8.11277e-13	0.856157	0.597	0.382	2.07573e-08	2.82442e-12	0.505358	0.612	0.445	7.22656e-08
DEPDC5	0.039737	0.503242	5.70033e-13	0.943422	0.642	0.392	1.45849e-08	1.55307e-06	0.503242	0.584	0.426	0.039737	8.24331e-18	0.749686	0.607	0.414	2.10913e-13
DBF4	0.000119906	0.502373	4.68637e-09	0.525473	0.792	0.614	0.000119906	6.55069e-16	0.602237	0.84	0.609	1.67606e-11	3.00898e-18	0.502373	0.738	0.54	7.69878e-14

## Sheet: Cluster_7
GENE	max.adj.pval	min.log2FC	IKK_ko_p_val	IKK_ko_avg_log2FC	IKK_ko_pct.1	IKK_ko_pct.2	IKK_ko_p_val_adj	IKK_ko_CLD_inh_p_val	IKK_ko_CLD_inh_avg_log2FC	IKK_ko_CLD_inh_pct.1	IKK_ko_CLD_inh_pct.2	IKK_ko_CLD_inh_p_val_adj	WT_p_val	WT_avg_log2FC	WT_pct.1	WT_pct.2	WT_p_val_adj
HIST1H1B	0	7.18383	0	8.07297	0.859	0.022	0	0	7.35255	0.851	0.033	0	0	7.18383	0.865	0.027	0
PIF1	3.00795e-153	6.3526	1.17562e-157	6.3526	0.38	0.014	3.00795e-153	7.83896e-241	6.42681	0.441	0.015	2.00568e-236	0	6.71521	0.5	0.016	0
UBE2C	0	6.20125	0	6.77788	0.979	0.056	0	0	6.59446	0.973	0.071	0	0	6.20125	0.977	0.075	0
CDC25C	0	6.08168	0	6.47821	0.986	0.031	0	0	6.08168	0.946	0.038	0	0	6.20388	0.918	0.036	0
HIST1H3B	0	6.07247	0	6.34013	0.704	0.012	0	0	6.07247	0.671	0.014	0	0	6.18119	0.582	0.011	0
KIF18B	0	5.87168	0	6.63021	0.958	0.026	0	0	5.87168	0.973	0.039	0	0	5.93594	0.98	0.038	0
NEURL1B	4.85642e-210	5.85303	1.89808e-214	5.85303	0.387	0.007	4.85642e-210	0	6.20002	0.441	0.007	0	0	5.91138	0.412	0.008	0
HJURP	0	5.76969	0	6.2031	0.951	0.025	0	0	5.81961	0.941	0.035	0	0	5.76969	0.956	0.04	0
HIST1H3G	4.35297e-146	5.48191	1.70131e-150	5.59876	0.289	0.006	4.35297e-146	3.39018e-207	5.48191	0.333	0.008	8.67412e-203	0	6.23021	0.38	0.006	0
HIST1H2AL	1.80074e-144	5.22204	7.03799e-149	5.41508	0.303	0.008	1.80074e-144	1.14208e-202	5.22204	0.374	0.013	2.92213e-198	4.36511e-279	5.91019	0.319	0.006	1.11686e-274
KIF14	7.16757e-269	5.21575	2.80137e-273	5.58417	0.958	0.076	7.16757e-269	0	5.22767	0.959	0.085	0	0	5.21575	0.956	0.09	0
IQGAP3	0	5.19927	0	5.53433	0.958	0.054	0	0	5.19927	0.982	0.074	0	0	5.34585	0.962	0.061	0
CDK1	2.26946e-242	5.17308	8.86992e-247	5.37081	0.993	0.104	2.26946e-242	0	5.42155	0.986	0.094	0	0	5.17308	0.985	0.084	0
NDC80	0	5.16456	0	5.87584	0.986	0.052	0	0	5.56535	0.995	0.071	0	0	5.16456	0.98	0.085	0
E2F8	0	5.13599	0	6.24208	0.775	0.013	0	0	5.50215	0.716	0.018	0	0	5.13599	0.558	0.017	0
ESPL1	3.17113e-300	5.13524	1.2394e-304	5.26075	0.711	0.025	3.17113e-300	0	5.13524	0.734	0.03	0	0	5.15663	0.675	0.027	0
CDCA3	0	5.11152	0	5.18579	0.859	0.037	0	0	5.24418	0.847	0.038	0	0	5.11152	0.751	0.031	0
AURKB	0	5.11066	0	5.53623	0.979	0.05	0	0	5.2775	0.968	0.058	0	0	5.11066	0.921	0.05	0
TTK	0	5.1048	0	5.57078	0.958	0.052	0	0	5.13185	0.973	0.067	0	0	5.1048	0.947	0.066	0
NEIL3	0	5.05966	0	5.36927	0.894	0.048	0	0	5.37646	0.923	0.048	0	0	5.05966	0.877	0.051	0
HIST1H2AM	7.22096e-142	5.02038	2.82223e-146	5.02038	0.331	0.01	7.22096e-142	2.79526e-204	5.87916	0.311	0.006	7.15195e-200	1.68167e-205	5.41325	0.254	0.007	4.30271e-201
TOP2A	3.31516e-180	5.00886	1.29569e-184	5.61298	1	0.168	3.31516e-180	8.60422e-240	5.34852	1	0.204	2.20148e-235	0	5.00886	1	0.224	0
NCAPG	0	5.00738	0	5.45467	0.951	0.059	0	0	5.01249	0.977	0.076	0	0	5.00738	0.956	0.068	0
KIF23	3.97953e-291	4.99271	1.55536e-295	5.66369	1	0.079	3.97953e-291	0	4.99271	0.982	0.108	0	0	5.11084	0.968	0.106	0
CKAP2L	0	4.98965	0	5.53758	0.937	0.046	0	0	4.98965	0.923	0.072	0	0	5.01399	0.962	0.071	0
CDCA2	2.41183e-280	4.96945	9.42637e-285	5.39127	0.993	0.081	2.41183e-280	0	5.19197	0.977	0.093	0	0	4.96945	0.965	0.091	0
SKA1	0	4.95024	0	5.47377	0.873	0.03	0	0	4.95024	0.829	0.037	0	0	4.98157	0.816	0.039	0
KIFC1	0	4.94509	0	5.51242	0.979	0.057	0	0	5.17967	0.964	0.064	0	0	4.94509	0.953	0.066	0
GTSE1	0	4.92383	0	5.27896	0.958	0.053	0	0	4.9915	0.932	0.068	0	0	4.92383	0.906	0.064	0
KIF2C	0	4.87969	0	5.104	0.944	0.05	0	0	5.09515	0.955	0.065	0	0	4.87969	0.947	0.065	0
RRM2	1.88978e-243	4.82579	7.38598e-248	5.47247	0.986	0.099	1.88978e-243	0	4.99761	0.991	0.119	0	0	4.82579	0.994	0.126	0
CDCA5	0	4.80672	0	5.37461	0.887	0.033	0	0	4.85605	0.86	0.04	0	0	4.80672	0.816	0.041	0
KIF15	0	4.78395	0	5.47722	0.993	0.065	0	0	5.04051	0.986	0.074	0	0	4.78395	0.982	0.091	0
HIST1H1D	1.5526e-156	4.7698	6.06817e-161	5.68151	0.768	0.091	1.5526e-156	1.13583e-192	5.17203	0.779	0.12	2.90613e-188	5.28959e-300	4.7698	0.801	0.113	1.35339e-295
HIST1H2AH	8.12275e-199	4.75986	3.17469e-203	5.01493	0.627	0.036	8.12275e-199	3.20045e-251	4.75986	0.64	0.043	8.18868e-247	0	5.02381	0.611	0.034	0
CCNA2	0	4.75582	0	5.07415	0.951	0.057	0	0	4.87572	0.941	0.069	0	0	4.75582	0.904	0.06	0
ESCO2	0	4.73664	0	5.55206	0.951	0.044	0	0	4.88572	0.95	0.063	0	0	4.73664	0.845	0.048	0
CENPI	0	4.7229	0	5.22113	0.93	0.047	0	0	4.83836	0.91	0.059	0	0	4.7229	0.863	0.058	0
SHCBP1	0	4.71954	0	5.45771	0.937	0.04	0	0	4.71954	0.946	0.058	0	0	5.00383	0.892	0.046	0
KIF4A	4.39188e-287	4.67608	1.71652e-291	5.06386	0.986	0.074	4.39188e-287	0	4.80637	0.986	0.088	0	0	4.67608	0.971	0.095	0
SPC25	1.46402e-185	4.60548	5.72195e-190	4.73707	0.958	0.136	1.46402e-185	6.98162e-285	4.67094	0.968	0.13	1.78632e-280	0	4.60548	0.959	0.141	0
KIF11	3.39974e-200	4.562	1.32875e-204	4.82445	0.993	0.137	3.39974e-200	6.33929e-285	4.62786	0.986	0.141	1.62197e-280	0	4.562	0.982	0.128	0
PBK	0	4.54	0	5.11376	0.965	0.058	0	0	4.67303	0.995	0.084	0	0	4.54	0.944	0.077	0
FAM83D	6.53851e-163	4.5364	2.5555e-167	4.56921	0.697	0.063	6.53851e-163	1.84108e-232	4.5364	0.748	0.076	4.71059e-228	0	4.96665	0.713	0.056	0
DIAPH3	8.09975e-238	4.5303	3.1657e-242	5.34862	1	0.108	8.09975e-238	2.85431e-303	4.75535	0.995	0.127	7.30305e-299	0	4.5303	0.997	0.139	0
KIF20A	1.24035e-211	4.52873	4.5706e-223	4.78431	0.549	0.021	1.16943e-218	1.05489e-223	5.07004	0.455	0.019	2.69905e-219	4.84778e-216	4.52873	0.383	0.023	1.24035e-211
CDCA8	1.5682e-183	4.5261	6.12915e-188	4.60863	0.965	0.138	1.5682e-183	2.36604e-290	4.5762	0.982	0.128	6.05375e-286	0	4.5261	0.968	0.114	0
HIST1H3D	8.55288e-154	4.48555	3.3428e-158	4.48555	0.521	0.032	8.55288e-154	5.09141e-201	4.50745	0.532	0.037	1.30269e-196	0	4.85027	0.491	0.021	0
PLK1	5.33189e-172	4.48508	2.08391e-176	4.62951	0.739	0.068	5.33189e-172	7.616e-247	4.48508	0.788	0.079	1.94863e-242	0	4.64877	0.719	0.062	0
NCAPH	0	4.44872	0	5.52216	0.979	0.054	0	0	4.78734	0.964	0.075	0	0	4.44872	0.965	0.1	0
CIT	6.60495e-128	4.44688	2.58147e-132	4.65198	1	0.293	6.60495e-128	5.9169e-201	4.45403	1	0.283	1.5139e-196	0	4.44688	1	0.245	0
DEPDC1	9.93043e-291	4.43282	3.8812e-295	4.845	0.923	0.057	9.93043e-291	0	4.57135	0.919	0.075	0	0	4.43282	0.892	0.082	0
NUSAP1	2.64697e-152	4.41777	1.03454e-156	4.94692	0.993	0.215	2.64697e-152	1.02916e-229	4.64216	1	0.22	2.63321e-225	0	4.41777	0.997	0.226	0
DLGAP5	9.40217e-249	4.40713	3.67473e-253	4.69542	0.923	0.072	9.40217e-249	0	4.52006	0.977	0.086	0	0	4.40713	0.901	0.085	0
KNL1	6.18431e-186	4.40224	2.41707e-190	4.88427	0.993	0.155	6.18431e-186	6.9585e-251	4.56059	0.991	0.174	1.7804e-246	0	4.40224	0.988	0.181	0
BUB1	1.39038e-264	4.39342	5.43416e-269	4.91416	0.965	0.078	1.39038e-264	0	4.48199	0.964	0.101	0	0	4.39342	0.968	0.121	0
ASPM	1.81337e-225	4.38299	7.08734e-230	4.7599	0.993	0.107	1.81337e-225	1.81836e-290	4.48053	0.995	0.126	4.65246e-286	0	4.38299	0.994	0.144	0
POLQ	0	4.37412	0	5.06654	0.979	0.064	0	0	4.4304	0.968	0.085	0	0	4.37412	0.965	0.088	0
NEK2	1.95888e-285	4.35452	7.65608e-290	4.93412	0.852	0.047	1.95888e-285	0	4.46826	0.842	0.059	0	0	4.35452	0.763	0.058	0
BUB1B	2.11051e-214	4.3326	8.2487e-219	4.88053	0.986	0.12	2.11051e-214	1.14514e-269	4.42424	0.991	0.151	2.92997e-265	0	4.3326	0.98	0.14	0
SGO2	9.22459e-224	4.28983	3.60533e-228	4.51772	0.93	0.087	9.22459e-224	5.3627e-280	4.28983	0.905	0.097	1.3721e-275	0	4.34266	0.93	0.132	0
SGO1	8.84412e-296	4.2639	3.45662e-300	4.87613	0.937	0.059	8.84412e-296	0	4.27305	0.932	0.076	0	0	4.2639	0.892	0.072	0
CCDC150	3.50789e-250	4.23181	1.37102e-254	4.49542	0.803	0.048	3.50789e-250	0	4.41691	0.851	0.056	0	0	4.23181	0.886	0.083	0
TICRR	9.64429e-295	4.21885	3.76936e-299	4.95915	0.782	0.035	9.64429e-295	0	4.47231	0.766	0.045	0	0	4.21885	0.708	0.051	0
ARHGAP33	4.05338e-115	4.21758	1.58422e-119	4.51683	0.338	0.016	4.05338e-115	1.27909e-144	4.32514	0.338	0.018	3.27267e-140	5.20667e-167	4.21758	0.289	0.016	1.33218e-162
HMMR	1.86852e-201	4.19029	7.30289e-206	4.41307	0.944	0.105	1.86852e-201	3.92511e-275	4.19029	0.964	0.122	1.00428e-270	0	4.2171	0.953	0.116	0
CCNF	2.01904e-176	4.14736	7.89121e-181	4.14736	0.775	0.074	2.01904e-176	1.45401e-306	4.42209	0.842	0.068	3.72023e-302	0	4.46261	0.711	0.056	0
MKI67	2.65821e-158	4.14202	1.03893e-162	4.8723	1	0.2	2.65821e-158	5.14096e-210	4.50433	1	0.249	1.31537e-205	2.44329e-291	4.14202	1	0.282	6.2514e-287
NUF2	6.54378e-182	4.10339	2.55756e-186	4.17602	0.958	0.127	6.54378e-182	4.56867e-259	4.16575	0.955	0.135	1.16894e-254	0	4.10339	0.974	0.142	0
CENPE	8.55898e-130	4.09934	3.34518e-134	4.21657	0.887	0.157	8.55898e-130	3.28856e-205	4.09934	0.941	0.172	8.41411e-201	7.72106e-297	4.11552	0.953	0.192	1.97551e-292
ANLN	2.96852e-132	4.08614	1.16021e-136	4.66831	1	0.273	2.96852e-132	4.21816e-197	4.38015	1	0.283	1.07926e-192	6.41787e-274	4.08614	1	0.317	1.64208e-269
PIMREG	1.72484e-222	4.08043	6.74133e-227	4.25652	0.704	0.039	1.72484e-222	2.06076e-242	4.08043	0.64	0.043	5.27267e-238	7.41868e-304	4.14227	0.556	0.036	1.89814e-299
RAD51AP1	1.87499e-268	4.06997	7.32818e-273	4.78431	0.901	0.062	1.87499e-268	0	4.3981	0.95	0.076	0	0	4.06997	0.857	0.082	0
DEPDC1B	7.9433e-174	4.05856	3.10455e-178	4.20823	0.937	0.13	7.9433e-174	3.98424e-273	4.30721	0.955	0.125	1.01941e-268	0	4.05856	0.93	0.137	0
PRC1	2.58994e-186	4.04863	1.01225e-190	4.6721	1	0.154	2.58994e-186	4.42654e-235	4.2229	0.986	0.185	1.13257e-230	0	4.04863	1	0.195	0
PSRC1	4.18707e-140	4.04538	1.63647e-144	4.16073	0.613	0.054	4.18707e-140	3.68481e-247	4.04538	0.712	0.056	9.42796e-243	0	4.21323	0.626	0.049	0
EME1	1.75857e-151	4.04532	9.04431e-190	5.04735	0.423	0.013	2.31408e-185	6.87319e-156	4.26987	0.369	0.02	1.75857e-151	1.41185e-172	4.04532	0.322	0.021	3.61235e-168
SPAG5	7.38417e-270	4.04147	2.88602e-274	4.5675	0.796	0.042	7.38417e-270	9.08398e-292	4.04147	0.757	0.051	2.32423e-287	0	4.04875	0.678	0.049	0
MXD3	6.93424e-177	4.0208	2.71017e-181	4.22172	0.641	0.044	6.93424e-177	1.91539e-243	4.20148	0.649	0.045	4.90073e-239	2.43462e-241	4.0208	0.5	0.04	6.22922e-237
TPX2	5.52697e-132	4.01463	2.16016e-136	4.28644	0.993	0.25	5.52697e-132	3.23885e-192	4.06374	1	0.271	8.28693e-188	4.54817e-301	4.01463	1	0.245	1.1637e-296
ARHGAP11B	2.68264e-149	3.98726	1.04848e-153	3.98726	0.796	0.094	2.68264e-149	9.8727e-282	4.20094	0.874	0.084	2.52603e-277	0	4.31511	0.851	0.089	0
TROAP	6.95603e-151	3.97828	2.71868e-155	4.04735	0.746	0.08	6.95603e-151	2.19343e-261	4.13019	0.851	0.087	5.6121e-257	0	3.97828	0.801	0.098	0
CIP2A	1.04289e-226	3.97552	4.07604e-231	4.36026	0.915	0.083	1.04289e-226	1.92796e-299	4.21945	0.937	0.099	4.93287e-295	0	3.97552	0.895	0.103	0
AURKA	1.1992e-121	3.97266	4.68692e-126	3.98122	0.937	0.201	1.1992e-121	1.34432e-159	3.97266	0.892	0.209	3.43959e-155	5.16782e-261	4.06022	0.883	0.179	1.32224e-256
MELK	3.81841e-175	3.9475	1.49238e-179	4.56625	0.979	0.158	3.81841e-175	1.61088e-254	4.26633	0.991	0.167	4.1216e-250	0	3.9475	0.98	0.165	0
WDR62	9.15458e-244	3.9223	3.57796e-248	4.62081	0.838	0.058	9.15458e-244	3.15428e-297	4.2702	0.856	0.074	8.07053e-293	0	3.9223	0.819	0.074	0
HIST2H2AC	2.00543e-82	3.91586	7.838e-87	3.91586	0.761	0.19	2.00543e-82	1.74836e-137	4.00154	0.752	0.164	4.47335e-133	2.36711e-219	4.22886	0.746	0.144	6.0565e-215
HIST1H1C	1.1614e-65	3.90609	4.53921e-70	3.96066	0.866	0.379	1.1614e-65	2.00844e-109	3.91292	0.878	0.371	5.1388e-105	2.713e-181	3.90609	0.892	0.342	6.94147e-177
AC091057.6	4.57574e-84	3.89752	1.78838e-88	3.89752	0.338	0.024	4.57574e-84	1.11306e-134	4.02274	0.347	0.021	2.84787e-130	2.05466e-195	4.21611	0.345	0.02	5.25707e-191
RTKN2	8.48221e-195	3.87722	3.31518e-199	4.28405	0.965	0.12	8.48221e-195	1.02316e-249	3.87722	0.937	0.131	2.61787e-245	0	3.89455	0.93	0.13	0
DDIAS	1.73172e-228	3.85476	6.94047e-251	4.5537	0.718	0.036	1.77579e-246	6.76823e-233	3.87469	0.631	0.044	1.73172e-228	2.40224e-301	3.85476	0.594	0.043	6.14638e-297
CEP55	9.7973e-256	3.85371	3.82917e-260	4.21124	0.965	0.076	9.7973e-256	2.64887e-305	3.90404	0.973	0.1	6.7774e-301	0	3.85371	0.942	0.096	0
SKA3	2.26776e-216	3.8214	8.86327e-221	4.46014	0.93	0.095	2.26776e-216	9.05947e-294	4.06842	0.959	0.107	2.31795e-289	0	3.8214	0.851	0.103	0
PKMYT1	6.50717e-192	3.82113	9.476e-217	4.68855	0.57	0.024	2.42453e-212	7.10758e-274	4.41071	0.581	0.027	1.81855e-269	2.54325e-196	3.82113	0.406	0.031	6.50717e-192
APOLD1	2.41111e-91	3.81837	9.42355e-96	3.99515	0.732	0.136	2.41111e-91	3.57142e-166	3.84668	0.775	0.13	9.13783e-162	1.06728e-241	3.81837	0.833	0.164	2.73074e-237
TACC3	1.61313e-180	3.81699	6.30476e-185	4.31078	0.986	0.153	1.61313e-180	4.57935e-236	4.00683	0.977	0.178	1.17167e-231	0	3.81699	0.974	0.17	0
ARHGAP11A	9.21908e-162	3.80894	3.60318e-166	4.02953	0.979	0.163	9.21908e-162	2.26448e-217	3.80894	0.946	0.162	5.7939e-213	0	3.84635	0.942	0.152	0
ARHGEF39	2.00376e-116	3.8068	7.83147e-121	3.8068	0.507	0.042	2.00376e-116	5.4879e-189	3.97849	0.568	0.047	1.40413e-184	6.88291e-291	4.17958	0.538	0.036	1.76106e-286
INCENP	3.5107e-143	3.78431	1.37212e-147	3.78431	0.873	0.129	3.5107e-143	1.86239e-207	3.80206	0.878	0.139	4.76512e-203	0	3.93314	0.848	0.11	0
NCAPG2	1.64161e-181	3.78393	6.41607e-186	4.45509	0.972	0.141	1.64161e-181	3.544e-227	3.89262	0.977	0.178	9.06767e-223	0	3.78393	0.953	0.17	0
SPC24	7.66604e-146	3.73909	2.99619e-150	3.92936	0.606	0.049	7.66604e-146	5.18605e-259	4.13458	0.68	0.047	1.3269e-254	2.94041e-241	3.73909	0.561	0.053	7.52334e-237
E2F7	2.27338e-239	3.7315	8.88524e-244	4.67297	0.817	0.055	2.27338e-239	7.50533e-252	3.93516	0.779	0.072	1.92031e-247	0	3.7315	0.763	0.077	0
PLK4	2.64071e-191	3.68596	1.03209e-195	4.08231	0.887	0.093	2.64071e-191	8.83925e-240	3.80068	0.851	0.099	2.26161e-235	0	3.68596	0.845	0.093	0
KIF18A	1.27496e-104	3.66976	4.98303e-109	3.66976	0.873	0.194	1.27496e-104	9.15024e-169	3.71277	0.878	0.176	2.34118e-164	9.0659e-262	3.70593	0.892	0.181	2.3196e-257
CEP128	7.60323e-177	3.63959	2.97164e-181	4.17894	0.951	0.13	7.60323e-177	1.29548e-255	4.01346	0.991	0.154	3.31463e-251	0	3.63959	0.982	0.189	0
CDC20	4.35549e-148	3.63268	1.70229e-152	3.69247	0.62	0.049	4.35549e-148	6.40039e-202	3.64825	0.671	0.063	1.6376e-197	2.57985e-303	3.63268	0.667	0.059	6.6008e-299
RAD54L	7.03815e-211	3.63181	2.75078e-215	4.3344	0.782	0.059	7.03815e-211	1.51533e-266	3.94351	0.793	0.068	3.87713e-262	2.08601e-295	3.63181	0.719	0.076	5.33727e-291
TRAIP	2.96774e-111	3.6177	1.15991e-115	4.08222	0.401	0.026	2.96774e-111	2.79314e-135	3.78293	0.401	0.031	7.14653e-131	2.78549e-162	3.6177	0.371	0.033	7.12696e-158
C17orf53	1.73277e-116	3.61285	6.44291e-151	4.55875	0.408	0.018	1.64848e-146	9.04337e-193	4.2351	0.441	0.023	2.31384e-188	6.77233e-121	3.61285	0.284	0.025	1.73277e-116
CSTF3-DT	9.819e-87	3.5793	3.83765e-91	4.49481	0.296	0.017	9.819e-87	3.44959e-92	3.75256	0.266	0.019	8.82612e-88	4.92589e-165	3.5793	0.371	0.032	1.26034e-160
CCNB1	1.10928e-118	3.54786	4.33551e-123	3.8572	0.796	0.124	1.10928e-118	2.74263e-161	3.61494	0.806	0.141	7.01729e-157	1.05391e-222	3.54786	0.749	0.127	2.69654e-218
C21orf58	7.3621e-149	3.54203	2.8774e-153	3.6271	0.746	0.078	7.3621e-149	9.623e-196	3.54203	0.757	0.093	2.46214e-191	1.05831e-266	3.61389	0.693	0.081	2.70779e-262
EXO1	6.96741e-256	3.54126	3.7058e-270	4.71804	0.711	0.031	9.48165e-266	3.10529e-269	3.94366	0.676	0.042	7.94519e-265	2.72313e-260	3.54126	0.567	0.048	6.96741e-256
CDKN2C	2.68312e-125	3.51277	5.78339e-142	3.87451	0.563	0.044	1.47974e-137	7.011e-189	3.88101	0.554	0.044	1.79383e-184	1.04867e-129	3.51277	0.345	0.037	2.68312e-125
MYBL2	1.6174e-225	3.5054	4.34122e-239	4.67172	0.746	0.044	1.11074e-234	6.6106e-261	4.06486	0.748	0.06	1.69139e-256	6.32143e-230	3.5054	0.558	0.056	1.6174e-225
HMGB2	2.99011e-93	3.49967	1.16865e-97	3.87286	0.993	0.483	2.99011e-93	7.85322e-146	3.5889	1	0.523	2.00932e-141	7.10716e-225	3.49967	0.997	0.462	1.81844e-220
KIF24	3.72185e-130	3.49397	1.45464e-134	3.53225	0.697	0.077	3.72185e-130	8.62631e-196	3.51288	0.685	0.07	2.20713e-191	4.75691e-285	3.49397	0.652	0.06	1.2171e-280
C18orf54	3.37251e-113	3.48863	1.31811e-117	4.15355	0.38	0.022	3.37251e-113	3.82203e-147	3.85947	0.405	0.028	9.77905e-143	2.55785e-178	3.48863	0.418	0.038	6.54453e-174
ASF1B	1.09981e-244	3.4778	4.29849e-249	4.47149	0.901	0.07	1.09981e-244	1.98206e-289	3.80865	0.914	0.089	5.0713e-285	0	3.4778	0.801	0.093	0
ERCC6L	2.3869e-154	3.4678	9.32894e-159	3.94226	0.655	0.055	2.3869e-154	1.57924e-211	3.72	0.644	0.054	4.04065e-207	1.07384e-185	3.4678	0.462	0.046	2.74752e-181
RACGAP1	3.57031e-106	3.46547	1.39541e-110	3.68883	0.979	0.36	3.57031e-106	4.47427e-162	3.46547	0.986	0.351	1.14479e-157	1.14456e-253	3.60143	0.98	0.304	2.92847e-249
KPNA2	1.05753e-65	3.45573	4.13324e-70	3.45573	0.866	0.35	1.05753e-65	9.77664e-123	3.47936	0.95	0.385	2.50145e-118	1.97253e-191	3.53111	0.918	0.324	5.04692e-187
TUBA1B	1.40111e-81	3.44313	5.47609e-86	3.58715	1	0.802	1.40111e-81	5.94961e-131	3.50203	0.995	0.775	1.52227e-126	1.8544e-202	3.44313	0.997	0.717	4.74466e-198
HIST1H1E	1.44202e-74	3.4328	5.63597e-79	3.70103	0.887	0.348	1.44202e-74	6.4755e-113	3.56324	0.865	0.344	1.65682e-108	2.93937e-180	3.4328	0.895	0.337	7.52068e-176
BLM	2.37137e-238	3.42153	5.2756e-250	4.15387	0.887	0.064	1.34981e-245	9.26823e-243	3.57497	0.811	0.081	2.37137e-238	6.68385e-299	3.42153	0.766	0.088	1.71013e-294
CENPW	8.063e-200	3.41496	3.15133e-204	3.92042	0.958	0.109	8.063e-200	1.23142e-222	3.50052	0.937	0.149	3.15072e-218	7.03831e-307	3.41496	0.895	0.136	1.80082e-302
ZWINT	4.67494e-192	3.41303	1.82715e-196	4.06481	0.965	0.124	4.67494e-192	9.36744e-247	3.66423	0.973	0.145	2.39675e-242	3.4152e-307	3.41303	0.906	0.141	8.73814e-303
POC1A	1.81369e-173	3.40795	7.08861e-178	3.74885	0.859	0.095	1.81369e-173	3.00299e-258	3.76084	0.896	0.102	7.68345e-254	1.50868e-280	3.40795	0.792	0.107	3.8601e-276
Z94721.3	1.71278e-67	3.39654	6.69422e-72	3.77102	0.317	0.027	1.71278e-67	1.13327e-99	3.39654	0.342	0.032	2.89958e-95	3.0532e-127	3.67246	0.287	0.024	7.81191e-123
CENPF	9.68873e-124	3.39164	3.78673e-128	4.00311	0.993	0.249	9.68873e-124	3.08723e-161	3.68217	0.991	0.317	7.89899e-157	6.56629e-223	3.39164	0.997	0.355	1.68005e-218
MTFR2	2.07172e-147	3.38593	8.09708e-152	3.87386	0.57	0.041	2.07172e-147	1.75771e-158	3.38593	0.545	0.052	4.49729e-154	3.72224e-243	3.73389	0.506	0.04	9.52372e-239
AC092718.4	1.87347e-97	3.37131	7.32224e-102	3.60816	0.458	0.041	1.87347e-97	1.1829e-122	3.37131	0.455	0.047	3.02657e-118	2.31148e-142	3.4662	0.363	0.037	5.91415e-138
TRIP13	1.11059e-137	3.36457	4.34063e-142	3.60948	0.725	0.081	1.11059e-137	2.07576e-209	3.49432	0.784	0.092	5.31103e-205	7.11622e-253	3.36457	0.699	0.088	1.82076e-248
FOXM1	8.58307e-137	3.34473	3.3546e-141	3.47163	0.951	0.181	8.58307e-137	8.28748e-186	3.36466	0.95	0.212	2.12043e-181	4.20677e-283	3.34473	0.93	0.181	1.07634e-278
BIRC5	9.67782e-202	3.32437	3.78247e-206	4.02984	0.986	0.116	9.67782e-202	4.96795e-235	3.57681	0.973	0.153	1.2711e-230	0	3.32437	0.959	0.163	0
KNSTRN	1.0179e-100	3.32392	3.97835e-105	3.35211	0.817	0.159	1.0179e-100	2.01372e-162	3.32392	0.824	0.149	5.15232e-158	2.31678e-252	3.64829	0.76	0.118	5.92772e-248
MYBL1	5.83259e-197	3.31791	2.2796e-201	4.21872	0.683	0.044	5.83259e-197	7.22358e-211	3.64593	0.676	0.061	1.84823e-206	1.32707e-242	3.31791	0.664	0.079	3.39545e-238
CCNB2	5.83079e-136	3.27003	2.2789e-140	3.61131	0.894	0.137	5.83079e-136	1.48475e-212	3.54122	0.905	0.136	3.79887e-208	2.08394e-248	3.27003	0.819	0.137	5.33196e-244
FANCD2	1.74032e-140	3.25925	6.80186e-145	3.50521	0.859	0.122	1.74032e-140	1.52704e-217	3.47854	0.869	0.118	3.90708e-213	2.18717e-246	3.25925	0.787	0.126	5.5961e-242
Z94721.1	4.30585e-125	3.24598	1.68289e-129	3.27017	0.887	0.153	4.30585e-125	1.32594e-193	3.27153	0.91	0.155	3.39254e-189	2.60907e-291	3.24598	0.898	0.142	6.67557e-287
PRR11	6.93554e-116	3.22453	2.71068e-120	3.57939	0.88	0.167	6.93554e-116	2.71233e-181	3.41018	0.932	0.183	6.93977e-177	1.65826e-207	3.22453	0.848	0.197	4.24283e-203
DSCC1	7.72779e-195	3.21842	3.02032e-199	4.26974	0.697	0.048	7.72779e-195	4.81943e-225	3.67672	0.712	0.064	1.2331e-220	1.22879e-218	3.21842	0.588	0.067	3.14397e-214
CDKN3	9.78145e-112	3.21283	3.82297e-116	3.43891	0.915	0.204	9.78145e-112	5.87867e-179	3.37484	0.968	0.22	1.50412e-174	2.87311e-240	3.21283	0.883	0.186	7.35114e-236
CKAP2	2.45915e-106	3.20511	9.61133e-111	3.4749	0.951	0.26	2.45915e-106	7.10631e-169	3.39418	0.977	0.269	1.81822e-164	1.12296e-234	3.20511	0.933	0.237	2.8732e-230
HIST1H4C	1.36956e-65	3.20481	5.35277e-70	3.68542	0.958	0.842	1.36956e-65	2.34034e-110	3.68762	0.968	0.844	5.98799e-106	8.16636e-163	3.20481	0.982	0.892	2.08944e-158
RECQL4	2.91671e-113	3.16364	9.0007e-168	4.09012	0.542	0.031	2.30292e-163	1.13996e-117	3.45733	0.41	0.039	2.91671e-113	1.94793e-121	3.16364	0.365	0.045	4.98399e-117
BRCA2	4.61654e-188	3.11451	1.80432e-192	4.08265	0.986	0.13	4.61654e-188	8.65019e-236	3.58948	0.968	0.15	2.21324e-231	3.17163e-276	3.11451	0.942	0.179	8.11493e-272
MIR924HG	3.8527e-136	3.1031	1.50578e-140	4.12631	1	0.228	3.8527e-136	2.25976e-188	3.62904	1	0.248	5.78182e-184	1.30923e-232	3.1031	0.997	0.306	3.34981e-228
DNA2	1.22294e-119	3.08481	4.77974e-124	3.58316	0.93	0.203	1.22294e-119	8.88628e-173	3.2853	0.937	0.212	2.27364e-168	4.16713e-221	3.08481	0.892	0.21	1.0662e-216
KIF20B	4.82263e-91	3.08431	1.88487e-95	3.41208	0.986	0.425	4.82263e-91	1.96255e-142	3.15912	1	0.44	5.02137e-138	1.25031e-213	3.08431	0.988	0.414	3.19905e-209
STIL	1.24407e-111	3.07927	4.86231e-116	3.28488	0.986	0.27	1.24407e-111	4.12017e-160	3.12179	0.982	0.291	1.05419e-155	4.42164e-238	3.07927	0.977	0.283	1.13132e-233
CENPA	1.8064e-62	3.07832	7.0601e-67	3.24838	0.754	0.22	1.8064e-62	7.24689e-116	3.14948	0.824	0.23	1.85419e-111	8.00767e-166	3.07832	0.83	0.253	2.04884e-161
TCF19	2.75342e-109	3.07748	5.63634e-142	3.83981	0.563	0.044	1.44211e-137	1.5173e-175	3.60353	0.577	0.053	3.88217e-171	1.07614e-113	3.07748	0.368	0.05	2.75342e-109
CENPN	3.18146e-139	3.07245	1.24344e-143	3.50646	0.937	0.165	3.18146e-139	2.23092e-183	3.20987	0.919	0.182	5.70804e-179	3.729e-233	3.07245	0.825	0.152	9.54101e-229
ORC6	2.5098e-167	3.07213	9.80928e-172	3.58963	0.937	0.125	2.5098e-167	5.27044e-211	3.36085	0.914	0.142	1.34849e-206	1.93105e-272	3.07213	0.901	0.154	4.94079e-268
CENPL	1.72585e-95	3.06729	6.74531e-100	3.06729	0.704	0.111	1.72585e-95	1.2037e-155	3.08454	0.716	0.104	3.07978e-151	8.18585e-215	3.11481	0.673	0.096	2.09443e-210
HIST1H2AG	2.18685e-84	3.06671	8.54707e-89	3.06671	0.542	0.068	2.18685e-84	7.674e-131	3.52305	0.505	0.057	1.96347e-126	6.63421e-246	4.15146	0.503	0.04	1.69743e-241
UBE2T	1.87252e-111	3.02441	7.31853e-116	3.34044	0.993	0.32	1.87252e-111	1.4392e-152	3.18026	0.973	0.35	3.68233e-148	1.17051e-214	3.02441	0.939	0.293	2.99486e-210
SNHG31	6.17427e-59	3.01839	2.41314e-63	3.71392	0.514	0.094	6.17427e-59	2.79773e-80	3.35724	0.491	0.093	7.15826e-76	7.61955e-126	3.01839	0.585	0.127	1.94954e-121
CENPM	4.22746e-180	3.01775	1.65226e-184	3.82238	0.915	0.109	4.22746e-180	9.3099e-230	3.63247	0.874	0.113	2.38203e-225	1.10499e-205	3.01775	0.725	0.123	2.82722e-201
CENPK	9.05059e-127	3.01239	3.53732e-131	3.60838	1	0.263	9.05059e-127	3.12203e-180	3.31357	0.986	0.261	7.98802e-176	2.57725e-246	3.01239	0.98	0.253	6.59416e-242
ASPN	1.10943e-67	3.00517	4.33607e-72	3.44262	0.352	0.034	1.10943e-67	2.93149e-76	3.09321	0.338	0.042	7.50052e-72	2.79802e-79	3.00517	0.254	0.033	7.15902e-75
FBXO5	1.45932e-115	2.9974	5.7036e-120	3.40326	0.901	0.19	1.45932e-115	3.40916e-174	3.49092	0.878	0.178	8.72267e-170	1.0541e-204	2.9974	0.836	0.195	2.69702e-200
CCDC18	2.87939e-87	2.99223	1.12538e-91	3.18718	0.965	0.375	2.87939e-87	9.31874e-138	2.99223	0.977	0.374	2.38429e-133	6.15474e-207	3.07504	0.962	0.365	1.57475e-202
REXO5	3.29994e-59	2.98907	1.28975e-63	3.10179	0.415	0.056	3.29994e-59	1.11118e-80	2.98907	0.374	0.049	2.84307e-76	2.39902e-125	3.14595	0.371	0.045	6.13812e-121
CDCA4	5.68886e-90	2.98192	2.22343e-94	2.99303	0.831	0.185	5.68886e-90	1.35412e-164	3.16681	0.883	0.174	3.46466e-160	2.40943e-205	2.98192	0.766	0.146	6.16476e-201
TK1	8.58567e-134	2.97669	3.35561e-138	3.80915	0.894	0.156	8.58567e-134	9.97849e-206	3.40491	0.959	0.178	2.5531e-201	2.18178e-218	2.97669	0.88	0.198	5.5823e-214
MAD2L1	6.4072e-108	2.97565	2.50418e-112	3.22525	0.951	0.261	6.4072e-108	3.03294e-153	2.99233	0.959	0.285	7.76009e-149	8.43604e-237	2.97565	0.936	0.232	2.15845e-232
GINS1	5.69635e-149	2.97536	2.22635e-153	3.83899	0.901	0.137	5.69635e-149	8.22858e-194	3.37405	0.919	0.168	2.10536e-189	8.35856e-251	2.97536	0.942	0.199	2.13862e-246
OIP5	1.09263e-120	2.96338	4.27044e-125	3.34408	0.817	0.128	1.09263e-120	8.41856e-152	2.96338	0.811	0.147	2.15397e-147	4.44558e-222	3.08391	0.754	0.126	1.13745e-217
H2AFX	4.17553e-93	2.95703	1.63196e-97	3.00095	0.979	0.404	4.17553e-93	4.80086e-137	2.95703	0.968	0.417	1.22835e-132	6.81395e-211	3.03264	0.959	0.362	1.74342e-206
FANCI	4.03973e-106	2.94658	1.57888e-110	3.67966	0.937	0.244	4.03973e-106	1.71538e-167	3.40913	0.959	0.245	4.38897e-163	3.15754e-211	2.94658	0.944	0.269	8.07887e-207
NCAPD2	2.55975e-88	2.9319	1.00045e-92	2.95299	0.979	0.436	2.55975e-88	1.51783e-139	2.9319	0.977	0.416	3.88353e-135	5.45437e-227	2.98675	1	0.381	1.39555e-222
GAS2L3	1.11613e-68	2.90751	4.36226e-73	2.90751	0.944	0.431	1.11613e-68	6.55788e-134	3.21895	0.973	0.395	1.6779e-129	1.92202e-223	3.53816	0.962	0.311	4.91769e-219
MND1	4.71945e-108	2.9066	1.84454e-112	3.08033	0.901	0.192	4.71945e-108	3.3147e-160	2.9066	0.919	0.204	8.481e-156	3.4184e-227	2.9724	0.868	0.182	8.74633e-223
ZGRF1	4.18385e-131	2.90411	1.63521e-135	3.41163	0.782	0.102	4.18385e-131	4.60171e-169	3.06983	0.766	0.11	1.17739e-164	5.11446e-208	2.90411	0.705	0.109	1.30859e-203
MASTL	5.48154e-98	2.89839	2.1424e-102	3.16509	0.852	0.186	5.48154e-98	9.92656e-153	3.05578	0.86	0.182	2.53981e-148	4.23187e-189	2.89839	0.781	0.168	1.08277e-184
SMC2	3.57546e-110	2.87127	1.39743e-114	3.25244	0.993	0.309	3.57546e-110	2.36824e-159	3.05347	0.982	0.325	6.05937e-155	1.24798e-226	2.87127	0.977	0.31	3.19308e-222
MCM10	2.11803e-181	2.865	9.95013e-187	3.81469	0.641	0.041	2.54584e-182	3.08983e-197	3.28158	0.626	0.053	7.90564e-193	8.27808e-186	2.865	0.55	0.067	2.11803e-181
CENPJ	1.27895e-129	2.86035	4.99862e-134	3.26295	0.908	0.158	1.27895e-129	7.24054e-185	3.19387	0.896	0.16	1.85256e-180	6.38402e-221	2.86035	0.863	0.18	1.63342e-216
GINS4	5.93185e-96	2.85639	2.3184e-100	3.42174	0.493	0.049	5.93185e-96	1.43851e-118	3.22204	0.5	0.062	3.68057e-114	1.3473e-129	2.85639	0.468	0.072	3.44721e-125
LMNB1	7.97353e-115	2.85257	3.11637e-119	3.46016	0.993	0.305	7.97353e-115	6.55269e-163	3.13774	0.991	0.332	1.67657e-158	1.41458e-226	2.85257	0.985	0.324	3.61936e-222
KIF22	3.3264e-101	2.8487	1.30009e-105	2.8487	0.901	0.203	3.3264e-101	1.14904e-149	2.91198	0.901	0.207	2.93993e-145	1.71458e-209	2.91452	0.836	0.182	4.38693e-205
CLSPN	1.0139e-169	2.84619	1.67831e-177	4.20644	0.768	0.073	4.29413e-173	9.87207e-191	3.54212	0.752	0.094	2.52587e-186	3.96269e-174	2.84619	0.667	0.117	1.0139e-169
BRCA1	8.11417e-99	2.84285	3.17133e-103	3.33949	0.958	0.302	8.11417e-99	1.19698e-146	3.14242	0.959	0.297	3.06259e-142	5.51831e-195	2.84285	0.936	0.291	1.41191e-190
LINC01572	3.48105e-105	2.81819	1.36053e-109	3.41023	0.965	0.277	3.48105e-105	5.71096e-155	3.17781	0.977	0.31	1.46121e-150	4.03764e-203	2.81819	0.994	0.404	1.03307e-198
PTTG1	4.40443e-96	2.81155	1.72142e-100	3.06224	0.944	0.26	4.40443e-96	5.67041e-149	3.06784	0.968	0.271	1.45083e-144	3.57952e-204	2.81155	0.921	0.25	9.15856e-200
CENPU	2.43479e-177	2.80918	9.51611e-182	4.00015	0.915	0.115	2.43479e-177	1.38021e-192	3.19786	0.905	0.155	3.53141e-188	2.67257e-208	2.80918	0.825	0.165	6.83804e-204
CKS1B	9.57142e-82	2.79809	3.74088e-86	2.83779	0.986	0.61	9.57142e-82	2.40186e-129	2.88715	0.977	0.601	6.1454e-125	1.98144e-186	2.79809	0.974	0.535	5.0697e-182
PARPBP	1.32194e-70	2.77618	5.16665e-75	2.86626	0.923	0.378	1.32194e-70	5.50718e-114	2.79983	0.928	0.392	1.40907e-109	1.2105e-177	2.77618	0.959	0.377	3.09718e-173
FEN1	3.43858e-128	2.77479	1.34393e-132	3.50152	0.824	0.124	3.43858e-128	2.49353e-149	3.04246	0.815	0.156	6.37995e-145	2.41206e-148	2.77479	0.678	0.149	6.17149e-144
C5orf34	1.81504e-93	2.76419	7.09389e-98	3.09826	0.641	0.09	1.81504e-93	1.43895e-100	2.76419	0.568	0.096	3.68169e-96	3.24056e-132	2.82516	0.512	0.087	8.2913e-128
PCLAF	1.22842e-141	2.76097	4.80115e-146	4.05053	0.937	0.168	1.22842e-141	3.42076e-184	3.42918	0.937	0.194	8.75235e-180	4.63896e-188	2.76097	0.822	0.185	1.18692e-183
STMN1	2.26618e-91	2.74892	8.85713e-96	3.52233	0.993	0.497	2.26618e-91	6.56169e-134	3.09099	0.991	0.559	1.67887e-129	1.40734e-192	2.74892	0.988	0.57	3.60083e-188
C1orf112	2.49186e-91	2.74336	9.73916e-96	2.97825	0.704	0.115	2.49186e-91	7.27051e-150	2.99339	0.707	0.103	1.86023e-145	1.03934e-157	2.74336	0.626	0.111	2.65924e-153
BRIP1	1.44204e-102	2.73479	5.63606e-107	3.4618	0.93	0.245	1.44204e-102	1.83064e-137	3.11326	0.901	0.246	4.68389e-133	2.07743e-199	2.73479	0.933	0.255	5.31531e-195
TUBB	1.51918e-81	2.72834	5.93753e-86	2.93663	0.993	0.788	1.51918e-81	6.94122e-132	2.8555	0.991	0.77	1.77598e-127	2.88305e-198	2.72834	0.988	0.72	7.37658e-194
UBE2S	4.12856e-75	2.7231	1.6136e-79	2.80994	0.986	0.635	4.12856e-75	2.31419e-120	2.7759	0.986	0.642	5.92108e-116	7.18871e-166	2.7231	0.977	0.616	1.8393e-161
HELLPAR	7.2008e-53	2.71895	2.81435e-57	2.72086	0.549	0.108	7.2008e-53	4.65127e-90	2.73537	0.599	0.12	1.19007e-85	1.80147e-140	2.71895	0.599	0.116	4.60924e-136
CENPP	1.30419e-101	2.71475	5.09727e-106	3.3087	0.93	0.237	1.30419e-101	5.99684e-136	2.86242	0.955	0.285	1.53435e-131	3.31949e-182	2.71475	0.889	0.247	8.49324e-178
SMC4	1.91284e-88	2.71342	7.47612e-93	3.01727	1	0.648	1.91284e-88	2.77672e-138	2.86428	1	0.637	7.10451e-134	3.39247e-203	2.71342	1	0.661	8.67997e-199
PSMC3IP	2.26544e-73	2.70973	8.85422e-78	3.30011	0.444	0.052	2.26544e-73	1.48017e-92	2.96938	0.45	0.064	3.78715e-88	3.60704e-89	2.70973	0.357	0.059	9.22897e-85
PMFBP1	1.732e-58	2.69231	8.15089e-81	3.45899	0.43	0.046	2.08549e-76	6.76933e-63	2.85235	0.333	0.05	1.732e-58	1.37983e-106	2.69231	0.409	0.066	3.53042e-102
BORA	2.1783e-39	2.68116	8.51363e-44	2.68116	0.641	0.2	2.1783e-39	2.17061e-87	2.82336	0.707	0.196	5.55371e-83	3.12586e-156	3.0993	0.678	0.152	7.99783e-152
FAM111B	9.23493e-116	2.67292	3.60937e-120	3.70586	0.528	0.046	9.23493e-116	2.91114e-138	3.18593	0.523	0.056	7.44844e-134	1.66303e-135	2.67292	0.477	0.07	4.25502e-131
CCDC15	4.66687e-55	2.66856	1.82399e-59	3.47352	0.289	0.028	4.66687e-55	1.33266e-84	3.25179	0.347	0.04	3.40973e-80	4.79108e-85	2.66856	0.327	0.052	1.22585e-80
AC008543.1	3.03182e-116	2.66581	2.30676e-125	3.42174	0.613	0.061	5.90208e-121	1.18495e-120	2.98178	0.532	0.068	3.03182e-116	3.0136e-122	2.66581	0.465	0.075	7.71061e-118
DBF4B	4.76277e-56	2.66424	1.86148e-60	2.6696	0.613	0.134	4.76277e-56	2.26136e-110	2.73526	0.662	0.125	5.78592e-106	8.12537e-142	2.66424	0.637	0.133	2.07896e-137
CHTF18	2.46436e-68	2.63526	9.63166e-73	3.26861	0.394	0.043	2.46436e-68	9.86736e-142	3.40647	0.5	0.049	2.52466e-137	1.9035e-90	2.63526	0.357	0.058	4.87029e-86
SASS6	8.89056e-107	2.6225	3.47478e-111	2.96657	0.887	0.178	8.89056e-107	2.17315e-148	2.85413	0.865	0.178	5.56023e-144	1.97754e-185	2.6225	0.83	0.192	5.05973e-181
XRCC2	2.38302e-123	2.6133	9.31378e-128	3.26075	0.746	0.096	2.38302e-123	2.81058e-175	2.92002	0.806	0.116	7.19115e-171	2.10949e-224	2.6133	0.83	0.144	5.39733e-220
GPSM2	2.17634e-66	2.61268	8.50596e-71	2.70185	0.965	0.511	2.17634e-66	1.45411e-111	2.69365	0.964	0.483	3.72049e-107	7.12715e-161	2.61268	0.971	0.495	1.82355e-156
RAD51	2.24572e-105	2.61081	4.49842e-164	3.82983	0.683	0.058	1.15097e-159	3.43047e-169	3.28375	0.617	0.064	8.7772e-165	8.77715e-110	2.61081	0.436	0.073	2.24572e-105
ATAD2	2.19773e-72	2.60766	8.58957e-77	3.25384	0.944	0.46	2.19773e-72	1.41767e-101	2.7523	0.928	0.462	3.62724e-97	1.9915e-152	2.60766	0.942	0.445	5.09546e-148
FANCB	4.47691e-98	2.60571	1.74975e-102	2.88488	0.915	0.222	4.47691e-98	6.86212e-151	2.77191	0.914	0.21	1.75574e-146	2.5168e-197	2.60571	0.88	0.206	6.43948e-193
RAD54B	5.96925e-96	2.59975	2.33301e-100	2.96946	0.676	0.098	5.96925e-96	9.95329e-115	2.59975	0.622	0.099	2.54665e-110	3.0909e-172	2.84501	0.602	0.093	7.90837e-168
RGS3	2.97925e-79	2.59005	1.16441e-83	2.67098	0.979	0.453	2.97925e-79	4.83691e-122	2.59005	0.959	0.423	1.23757e-117	6.73794e-199	2.82376	0.965	0.38	1.72397e-194
NCAPD3	6.90946e-92	2.56795	2.70048e-96	2.91224	0.965	0.347	6.90946e-92	4.45895e-140	2.7316	0.977	0.365	1.14087e-135	2.61069e-183	2.56795	0.933	0.312	6.6797e-179
CEP152	4.01162e-99	2.56778	1.5679e-103	2.94383	0.979	0.289	4.01162e-99	6.08166e-130	2.62631	0.955	0.296	1.55605e-125	3.26829e-182	2.56778	0.927	0.293	8.36224e-178
TYMS	1.93183e-105	2.56381	7.55032e-110	3.41371	0.993	0.339	1.93183e-105	2.60693e-136	2.96349	0.977	0.386	6.67009e-132	2.57351e-162	2.56381	0.921	0.347	6.58457e-158
PRIM1	5.13476e-110	2.56132	2.00686e-114	3.31793	0.746	0.112	5.13476e-110	6.2406e-119	2.87766	0.707	0.137	1.59672e-114	4.80311e-143	2.56132	0.716	0.173	1.22892e-138
KNTC1	2.06821e-111	2.55958	8.08335e-116	3.42732	0.887	0.186	2.06821e-111	1.42297e-146	3.01985	0.874	0.202	3.64081e-142	2.52361e-176	2.55958	0.874	0.234	6.4569e-172
NEMP1	3.06388e-91	2.54131	1.19748e-95	2.88576	0.901	0.237	3.06388e-91	4.10683e-135	2.70352	0.901	0.241	1.05077e-130	1.83074e-176	2.54131	0.857	0.229	4.68414e-172
TBC1D31	3.1584e-77	2.53352	1.23442e-81	2.53352	0.831	0.201	3.1584e-77	5.3616e-113	2.61895	0.82	0.21	1.37182e-108	3.20313e-166	2.65381	0.81	0.211	8.19553e-162
TEDC1	8.1874e-49	2.50918	3.19995e-53	2.50918	0.528	0.107	8.1874e-49	9.03923e-90	2.55377	0.572	0.109	2.31278e-85	1.68347e-114	2.68362	0.447	0.074	4.30732e-110
CDKN2D	1.098e-50	2.49751	4.29139e-55	2.49751	0.655	0.167	1.098e-50	6.05619e-121	3.02846	0.707	0.14	1.54954e-116	5.9919e-195	3.26687	0.626	0.093	1.53309e-190
CENPQ	2.46368e-88	2.48579	9.62903e-93	2.85069	0.697	0.114	2.46368e-88	1.31327e-112	2.73172	0.658	0.119	3.36013e-108	2.36305e-116	2.48579	0.547	0.111	6.0461e-112
CDC6	1.82443e-85	2.47632	7.13059e-90	3.12867	0.683	0.12	1.82443e-85	1.16909e-96	2.64001	0.658	0.141	2.99124e-92	9.01109e-125	2.47632	0.62	0.139	2.30558e-120
CKS2	6.45339e-65	2.47153	2.52223e-69	2.59638	0.986	0.649	6.45339e-65	2.2162e-101	2.63682	0.968	0.633	5.67037e-97	2.35318e-140	2.47153	0.95	0.562	6.02084e-136
AC073529.1	5.23045e-53	2.45383	2.04426e-57	2.45383	0.57	0.114	5.23045e-53	8.60558e-102	2.72762	0.662	0.134	2.20182e-97	2.67827e-151	2.78158	0.655	0.131	6.85261e-147
FAM111A	2.09999e-85	2.45337	8.20756e-90	2.89813	0.951	0.375	2.09999e-85	1.32489e-102	2.45337	0.923	0.442	3.38986e-98	8.96877e-186	2.8223	0.939	0.347	2.29475e-181
CDC45	4.79471e-121	2.44601	2.05252e-174	4.13642	0.606	0.04	5.25157e-170	1.67704e-186	3.31212	0.581	0.048	4.29088e-182	1.87396e-125	2.44601	0.453	0.067	4.79471e-121
NIBAN1	1.43549e-45	2.42892	5.61044e-50	2.72516	0.556	0.128	1.43549e-45	6.19984e-53	2.52694	0.613	0.213	1.58629e-48	1.50473e-101	2.42892	0.757	0.273	3.84999e-97
RIBC2	7.74397e-73	2.4278	1.34153e-78	3.16738	0.535	0.077	3.43245e-74	1.55744e-98	2.9018	0.527	0.084	3.98487e-94	3.02664e-77	2.4278	0.442	0.106	7.74397e-73
AC004158.1	3.0811e-58	2.42715	1.24278e-74	3.26175	0.38	0.038	3.17979e-70	2.07503e-72	3.1664	0.311	0.038	5.30918e-68	1.20421e-62	2.42715	0.281	0.051	3.0811e-58
CDC25B	5.47176e-62	2.3937	2.13857e-66	2.81156	0.627	0.128	5.47176e-62	1.64644e-70	2.53688	0.608	0.162	4.21258e-66	4.89237e-110	2.3937	0.713	0.236	1.25176e-105
RAD9B	1.09106e-29	2.37516	3.19966e-44	2.80803	0.296	0.039	8.18664e-40	4.26428e-34	2.37516	0.257	0.053	1.09106e-29	1.35638e-71	2.85255	0.26	0.039	3.47042e-67
DTYMK	5.08584e-81	2.37433	1.98774e-85	2.57345	0.986	0.447	5.08584e-81	2.33978e-118	2.41184	0.973	0.481	5.98655e-114	4.0095e-181	2.37433	0.994	0.532	1.02587e-176
CENPO	1.27537e-72	2.35858	4.98465e-77	2.65857	0.852	0.247	1.27537e-72	3.93655e-92	2.35858	0.815	0.26	1.0072e-87	4.05085e-166	2.52131	0.868	0.261	1.03645e-161
DSN1	1.08616e-88	2.34066	4.24515e-93	2.98681	0.746	0.139	1.08616e-88	1.94997e-140	2.93949	0.775	0.142	4.9892e-136	3.48435e-137	2.34066	0.696	0.161	8.91507e-133
FANCA	6.65181e-122	2.33991	2.59978e-126	3.25082	0.93	0.18	6.65181e-122	1.95593e-142	2.88518	0.887	0.206	5.00445e-138	5.14227e-162	2.33991	0.857	0.24	1.3157e-157
VRK1	1.43785e-91	2.33966	5.61967e-96	2.71051	1	0.4	1.43785e-91	1.1869e-130	2.53221	0.991	0.423	3.0368e-126	9.00516e-168	2.33966	0.956	0.382	2.30406e-163
ZNF695	7.94146e-82	2.33581	3.10383e-86	2.83244	0.697	0.124	7.94146e-82	6.15576e-93	2.3693	0.671	0.146	1.57501e-88	4.12615e-129	2.33581	0.629	0.136	1.05572e-124
HIST1H4E	1.12261e-26	2.33262	4.38758e-31	2.33262	0.324	0.065	1.12261e-26	1.55523e-85	2.88885	0.419	0.059	3.9792e-81	3.53293e-76	2.63985	0.319	0.055	9.03934e-72
TUBB4B	2.70651e-70	2.32911	1.05781e-74	2.32911	1	0.856	2.70651e-70	1.58009e-116	2.41835	0.991	0.847	4.04282e-112	2.88188e-169	2.5924	0.991	0.75	7.37357e-165
AUNIP	2.51412e-65	2.31305	9.82616e-70	2.78044	0.493	0.071	2.51412e-65	5.32931e-84	2.52851	0.518	0.092	1.36356e-79	2.29566e-99	2.31305	0.459	0.088	5.87368e-95
ATAD5	1.36834e-88	2.30901	5.348e-93	2.94082	0.958	0.312	1.36834e-88	1.18493e-118	2.71224	0.892	0.291	3.03176e-114	3.61851e-140	2.30901	0.868	0.307	9.25833e-136
CENPH	2.37297e-107	2.30618	9.2745e-112	3.01404	0.901	0.194	2.37297e-107	2.33378e-134	2.66172	0.896	0.226	5.97122e-130	7.03713e-133	2.30618	0.804	0.248	1.80052e-128
DHFR	2.76605e-86	2.28384	1.08108e-90	2.99967	0.951	0.326	2.76605e-86	5.61044e-130	2.7999	0.95	0.346	1.43549e-125	2.0559e-136	2.28384	0.886	0.348	5.26022e-132
EFCAB11	1.23191e-50	2.28211	4.81479e-55	2.30474	0.768	0.231	1.23191e-50	3.78035e-100	2.31422	0.82	0.224	9.6724e-96	1.51454e-141	2.28211	0.801	0.221	3.87511e-137
ZWILCH	7.06608e-70	2.28059	2.7617e-74	2.46621	0.732	0.156	7.06608e-70	1.55732e-96	2.39931	0.716	0.166	3.98456e-92	4.54452e-116	2.28059	0.611	0.14	1.16276e-111
RFC3	1.01958e-103	2.28027	3.98493e-108	2.94797	0.908	0.2	1.01958e-103	9.67135e-117	2.49095	0.869	0.243	2.47451e-112	1.91003e-149	2.28027	0.848	0.248	4.88701e-145
POLA2	2.96155e-64	2.27912	1.15749e-68	2.64727	0.634	0.125	2.96155e-64	3.44264e-91	2.58197	0.613	0.126	8.80833e-87	1.21136e-97	2.27912	0.55	0.132	3.09938e-93
FIGNL1	8.0222e-44	2.2654	3.13539e-48	2.36641	0.648	0.182	8.0222e-44	5.15388e-82	2.2654	0.68	0.174	1.31867e-77	4.07607e-100	2.26568	0.629	0.174	1.0429e-95
SLFN13	4.30255e-88	2.2632	1.6816e-92	2.93745	0.838	0.195	4.30255e-88	8.58406e-106	2.55403	0.784	0.197	2.19632e-101	4.57178e-134	2.2632	0.801	0.243	1.16973e-129
FANCG	1.55418e-43	2.24753	1.76378e-54	2.92449	0.359	0.048	4.5128e-50	1.15496e-77	2.87155	0.396	0.058	2.95509e-73	6.07434e-48	2.24753	0.254	0.053	1.55418e-43
MTBP	6.15101e-65	2.23858	2.40405e-69	2.44821	0.803	0.224	6.15101e-65	3.9039e-110	2.29406	0.865	0.232	9.98852e-106	2.36966e-137	2.23858	0.801	0.228	6.06301e-133
LRR1	5.09397e-62	2.23446	1.99092e-66	2.39803	0.754	0.194	5.09397e-62	1.43753e-97	2.34245	0.784	0.209	3.67806e-93	3.11861e-104	2.23446	0.635	0.173	7.97928e-100
SPDL1	3.16697e-52	2.23364	1.23778e-56	2.23364	0.697	0.181	3.16697e-52	3.74114e-106	2.47849	0.784	0.188	9.57209e-102	2.65791e-167	2.68743	0.728	0.153	6.80054e-163
PAX6	1.52796e-57	2.22895	5.97187e-62	2.50893	0.634	0.136	1.52796e-57	3.23217e-62	2.22895	0.545	0.136	8.26982e-58	1.47595e-124	2.52062	0.573	0.117	3.77637e-120
ZNF519	2.317e-68	2.21603	9.05572e-73	2.45007	0.704	0.143	2.317e-68	2.90788e-83	2.24935	0.649	0.148	7.44011e-79	1.06558e-100	2.21603	0.608	0.16	2.72639e-96
ORC1	4.28062e-70	2.21237	6.09072e-114	3.52651	0.486	0.04	1.55837e-109	5.78026e-81	2.8206	0.392	0.054	1.47894e-76	1.67303e-74	2.21237	0.36	0.069	4.28062e-70
CDT1	9.05803e-91	2.17611	4.96618e-152	3.65909	0.739	0.078	1.27065e-147	1.20411e-141	2.90426	0.644	0.087	3.08083e-137	3.54023e-95	2.17611	0.526	0.12	9.05803e-91
AP001347.1	1.00422e-54	2.16915	3.92487e-59	2.46927	0.563	0.109	1.00422e-54	7.3495e-77	2.38007	0.563	0.12	1.88044e-72	5.66884e-96	2.16915	0.561	0.137	1.45043e-91
C4orf46	8.15944e-54	2.16905	3.18903e-58	2.61598	0.542	0.105	8.15944e-54	1.01338e-64	2.16905	0.541	0.127	2.59284e-60	1.69946e-98	2.28771	0.515	0.113	4.34824e-94
CHEK1	3.89939e-75	2.16888	1.52403e-79	2.69874	0.845	0.235	3.89939e-75	9.22852e-104	2.47064	0.842	0.25	2.36121e-99	9.36538e-137	2.16888	0.851	0.271	2.39623e-132
DDX11	1.25816e-83	2.15979	4.91737e-88	2.82699	0.845	0.213	1.25816e-83	4.98523e-123	2.60509	0.878	0.242	1.27552e-118	8.06095e-120	2.15979	0.781	0.252	2.06247e-115
ECT2	3.95107e-76	2.15928	1.54423e-80	2.25636	1	0.813	3.95107e-76	2.97447e-125	2.18015	0.995	0.803	7.61047e-121	2.91056e-186	2.15928	1	0.817	7.44697e-182
RRM1	5.66972e-74	2.15861	2.21595e-78	2.79102	0.937	0.375	5.66972e-74	3.32647e-119	2.64585	0.959	0.398	8.51111e-115	2.2361e-110	2.15861	0.848	0.362	5.72129e-106
GEN1	1.00043e-63	2.13882	3.91006e-68	2.36563	0.951	0.461	1.00043e-63	7.64648e-98	2.13882	0.968	0.487	1.95643e-93	1.42964e-161	2.19952	0.971	0.51	3.65789e-157
ARHGAP19	9.46599e-41	2.1265	3.69967e-45	2.1265	0.704	0.215	9.46599e-41	4.15299e-86	2.56788	0.716	0.202	1.06258e-81	1.46509e-146	2.73351	0.684	0.158	3.74859e-142
TEX30	1.67485e-59	2.12095	6.54597e-64	2.45564	0.655	0.144	1.67485e-59	4.58366e-70	2.15646	0.613	0.156	1.17277e-65	3.13099e-78	2.12095	0.491	0.126	8.01094e-74
ZNF367	8.49537e-106	2.11316	6.65445e-119	3.30816	0.676	0.083	1.70261e-114	7.83263e-112	2.59025	0.617	0.101	2.00406e-107	3.32032e-110	2.11316	0.594	0.134	8.49537e-106
PHF19	2.68675e-60	2.09659	1.05009e-64	2.26101	0.859	0.294	2.68675e-60	1.725e-88	2.15268	0.838	0.276	4.41357e-84	6.10178e-106	2.09659	0.737	0.243	1.5612e-101
TMPO	1.61599e-86	2.09534	6.31592e-91	2.36786	1	0.927	1.61599e-86	2.74828e-134	2.28756	1	0.919	7.03174e-130	3.40545e-197	2.09534	1	0.924	8.71319e-193
HIRIP3	1.30559e-53	2.08548	5.10277e-58	2.36927	0.697	0.178	1.30559e-53	4.55489e-70	2.11379	0.694	0.208	1.16542e-65	6.02248e-90	2.08548	0.582	0.16	1.54091e-85
ANP32E	1.71463e-60	2.08454	6.70145e-65	2.22691	0.944	0.475	1.71463e-60	1.13735e-98	2.08454	0.977	0.524	2.91003e-94	7.3527e-141	2.20413	0.93	0.441	1.88126e-136
TIMELESS	7.61282e-73	2.08125	2.97539e-77	2.68439	0.81	0.208	7.61282e-73	1.80467e-104	2.43192	0.829	0.235	4.61744e-100	5.75758e-119	2.08125	0.784	0.247	1.47313e-114
AC026401.3	2.84631e-23	2.07088	1.11245e-27	2.12248	0.387	0.1	2.84631e-23	1.03652e-36	2.07088	0.347	0.087	2.65203e-32	1.69202e-52	2.2425	0.304	0.07	4.32921e-48
NCAPH2	1.00445e-29	2.06764	3.92576e-34	2.06764	0.444	0.107	1.00445e-29	4.47882e-44	2.06839	0.423	0.109	1.14595e-39	1.69037e-51	2.07406	0.36	0.097	4.32498e-47
AC093249.2	2.22825e-31	2.06707	2.36364e-49	2.54146	0.437	0.077	6.0476e-45	8.70887e-36	2.06707	0.333	0.082	2.22825e-31	9.09058e-80	2.37942	0.415	0.089	2.32591e-75
NAV2	4.40745e-20	2.05875	1.7226e-24	2.06342	0.528	0.195	4.40745e-20	2.77929e-39	2.32392	0.509	0.169	7.11109e-35	2.48916e-55	2.05875	0.564	0.216	6.36877e-51
BCL2L12	1.32964e-55	2.05827	5.19674e-60	2.14751	0.782	0.221	1.32964e-55	2.17535e-76	2.08069	0.725	0.21	5.56586e-72	9.58995e-112	2.05827	0.74	0.227	2.45368e-107
BARD1	7.64077e-68	2.05237	2.98631e-72	2.48269	0.951	0.472	7.64077e-68	1.66216e-105	2.35555	0.955	0.443	4.25279e-101	6.23211e-146	2.05237	0.982	0.57	1.59455e-141
CNTROB	1.71567e-33	2.05221	6.70551e-38	2.05221	0.563	0.161	1.71567e-33	2.7998e-65	2.14795	0.608	0.163	7.16358e-61	6.84717e-88	2.10859	0.57	0.155	1.75192e-83
PARP2	2.54974e-43	2.04937	9.96536e-48	2.13771	0.648	0.175	2.54974e-43	2.89776e-59	2.0752	0.622	0.188	7.4142e-55	1.48337e-87	2.04937	0.611	0.182	3.79536e-83
EZH2	1.08929e-70	2.04787	4.25738e-75	2.60945	0.965	0.498	1.08929e-70	3.8552e-94	2.18037	0.946	0.53	9.86392e-90	2.29233e-134	2.04787	0.971	0.502	5.86515e-130
CEP135	1.07602e-54	2.04627	4.20551e-59	2.26231	0.824	0.277	1.07602e-54	1.86654e-83	2.06649	0.86	0.304	4.77573e-79	3.67889e-112	2.04627	0.822	0.3	9.4128e-108
RTTN	3.18469e-56	2.04321	1.2447e-60	2.11731	0.958	0.482	3.18469e-56	8.02533e-104	2.18741	0.973	0.47	2.05336e-99	1.49527e-145	2.04321	0.98	0.5	3.8258e-141
MPHOSPH9	4.02031e-73	2.04126	1.57129e-77	2.23022	0.993	0.656	4.02031e-73	6.04101e-114	2.04357	0.995	0.685	1.54565e-109	6.04969e-158	2.04126	0.991	0.642	1.54787e-153
ZNF165	2.28179e-22	2.03673	8.91812e-27	2.03673	0.437	0.127	2.28179e-22	7.4526e-56	2.21587	0.527	0.139	1.90682e-51	3.97898e-94	2.59301	0.471	0.102	1.01806e-89
MCM8	4.50277e-50	2.03223	1.75986e-54	2.35326	0.683	0.183	4.50277e-50	1.59754e-71	2.22204	0.631	0.163	4.08747e-67	3.39598e-95	2.03223	0.746	0.269	8.68896e-91
MIS18A	1.14165e-68	2.02088	4.46202e-73	2.44132	0.81	0.214	1.14165e-68	3.74066e-100	2.25354	0.829	0.229	9.57085e-96	2.52748e-104	2.02088	0.716	0.221	6.46682e-100
EMC9	2.85589e-33	2.0177	1.11619e-37	2.0177	0.599	0.179	2.85589e-33	5.93851e-63	2.08581	0.64	0.189	1.51943e-58	2.09229e-92	2.26913	0.57	0.153	5.35332e-88
NSD2	3.98032e-80	2.00719	1.55566e-84	2.36521	1	0.828	3.98032e-80	5.28509e-121	2.20208	1	0.839	1.35224e-116	2.59671e-171	2.00719	0.997	0.846	6.64395e-167
RFC4	4.86458e-69	1.9897	1.90126e-73	2.67129	0.711	0.153	4.86458e-69	3.12531e-84	2.35355	0.685	0.173	7.99641e-80	1.30508e-85	1.9897	0.614	0.185	3.33917e-81
PLEKHH2	8.90229e-26	1.98884	3.47936e-30	2.01606	0.585	0.205	8.90229e-26	1.10498e-52	2.0752	0.635	0.215	2.8272e-48	7.14186e-61	1.98884	0.48	0.148	1.82732e-56
GGH	1.0898e-86	1.98125	1.24985e-91	2.66374	0.887	0.208	3.19786e-87	4.25936e-91	2.08824	0.86	0.289	1.0898e-86	9.30644e-106	1.98125	0.778	0.27	2.38115e-101
DLEU2	6.83483e-65	1.96313	2.67132e-69	2.05563	0.993	0.752	6.83483e-65	5.89689e-104	1.96512	0.995	0.756	1.50878e-99	6.26915e-159	1.96313	1	0.745	1.60403e-154
NUDT1	2.01338e-73	1.95898	7.86907e-78	2.36883	0.852	0.213	2.01338e-73	1.34074e-99	2.32651	0.833	0.238	3.43041e-95	3.59503e-106	1.95898	0.737	0.23	9.19825e-102
WDHD1	2.09891e-94	1.9566	8.20335e-99	2.86784	0.796	0.148	2.09891e-94	2.71821e-110	2.55536	0.775	0.179	6.95481e-106	3.48523e-99	1.9566	0.705	0.216	8.91732e-95
SMTN	2.66548e-45	1.95624	1.08846e-60	2.4287	0.648	0.147	2.78494e-56	1.04177e-49	1.95624	0.532	0.153	2.66548e-45	2.20062e-78	2.21561	0.506	0.136	5.63052e-74
LIN9	4.70946e-40	1.95468	1.84064e-44	1.95468	0.746	0.262	4.70946e-40	3.6083e-74	2.08819	0.748	0.239	9.2322e-70	5.60542e-136	2.20914	0.772	0.206	1.4342e-131
SAPCD2	3.29526e-37	1.95144	1.28792e-41	2.20728	0.613	0.181	3.29526e-37	1.97052e-47	1.95144	0.577	0.187	5.04178e-43	1.15888e-68	2.14983	0.541	0.178	2.96512e-64
G2E3	1.75375e-45	1.94375	6.85434e-50	2.01433	0.944	0.668	1.75375e-45	3.05163e-81	1.94375	0.95	0.653	7.80789e-77	5.84925e-120	2.04657	0.956	0.608	1.49659e-115
CEP85	1.49673e-46	1.93632	5.8498e-51	1.93632	0.81	0.265	1.49673e-46	1.81234e-72	2.02368	0.779	0.27	4.63705e-68	6.10955e-105	2.00382	0.778	0.271	1.56319e-100
CHEK2	4.58908e-43	1.93266	1.79359e-47	1.96529	0.746	0.235	4.58908e-43	2.49133e-70	1.93266	0.757	0.247	6.37432e-66	6.04055e-96	1.94179	0.684	0.207	1.54553e-91
CDK5RAP2	1.25237e-63	1.92532	4.89475e-68	2.02138	0.986	0.613	1.25237e-63	6.21859e-105	2.11254	0.977	0.615	1.59109e-100	4.81757e-142	1.92532	0.991	0.648	1.23262e-137
AL606489.1	1.4785e-29	1.92248	5.77857e-34	1.93416	0.683	0.268	1.4785e-29	2.00542e-44	1.92248	0.631	0.243	5.13106e-40	1.28027e-88	2.12056	0.658	0.215	3.27571e-84
DNAJC9	3.54684e-62	1.92033	1.38624e-66	2.20333	0.972	0.553	3.54684e-62	5.98234e-84	2.01199	0.959	0.546	1.53064e-79	5.96551e-116	1.92033	0.936	0.546	1.52634e-111
YPEL1	3.56909e-23	1.91126	3.82247e-42	2.47298	0.43	0.086	9.78017e-38	1.39494e-27	1.91126	0.284	0.075	3.56909e-23	1.14837e-43	1.94656	0.351	0.104	2.93821e-39
SCLT1	4.36055e-39	1.90986	1.70427e-43	2.12518	0.951	0.607	4.36055e-39	2.21581e-64	1.90986	0.95	0.613	5.66938e-60	3.1053e-101	2.02938	0.936	0.582	7.94523e-97
MIS18BP1	1.0819e-67	1.90226	4.22848e-72	1.90226	0.993	0.779	1.0819e-67	1.86334e-111	1.95982	1	0.759	4.76754e-107	2.878e-153	1.97502	0.982	0.692	7.36364e-149
HMGB3	2.52179e-53	1.89981	9.85612e-58	2.0873	0.937	0.547	2.52179e-53	1.13755e-80	1.89981	0.95	0.6	2.91053e-76	1.70844e-114	1.99078	0.942	0.552	4.37122e-110
CHAF1A	1.82229e-69	1.89762	7.12222e-74	2.76851	0.796	0.215	1.82229e-69	3.02738e-82	2.223	0.761	0.223	7.74585e-78	2.20133e-93	1.89762	0.69	0.219	5.63233e-89
TAF5	8.30686e-24	1.89646	3.24664e-28	1.90818	0.451	0.129	8.30686e-24	3.68113e-62	2.24823	0.509	0.118	9.41853e-58	4.71438e-47	1.89646	0.365	0.106	1.20622e-42
PBX3	7.26221e-71	1.89025	2.83835e-75	2.68745	0.901	0.292	7.26221e-71	9.43357e-98	2.21366	0.887	0.292	2.41367e-93	8.6285e-111	1.89025	0.868	0.314	2.20769e-106
DTL	7.204e-105	1.88551	5.76158e-136	3.16028	0.648	0.062	1.47416e-131	4.24511e-115	2.52419	0.568	0.08	1.08615e-110	2.8156e-109	1.88551	0.55	0.112	7.204e-105
FANCM	1.38289e-36	1.8713	5.40486e-41	1.89066	0.725	0.256	1.38289e-36	9.22728e-64	1.8713	0.77	0.282	2.36089e-59	1.85272e-115	2.04148	0.778	0.245	4.74037e-111
LMNB2	4.11057e-58	1.87017	1.60657e-62	2.1223	0.901	0.388	4.11057e-58	2.58772e-79	1.90258	0.901	0.41	6.62093e-75	1.25283e-126	1.87017	0.927	0.41	3.2055e-122
SLC43A3	7.28916e-28	1.86972	2.84888e-32	2.45584	0.289	0.05	7.28916e-28	7.3483e-40	2.44945	0.297	0.061	1.88014e-35	1.12471e-34	1.86972	0.266	0.074	2.87769e-30
MZT1	1.93119e-53	1.86559	7.54784e-58	1.86977	0.951	0.526	1.93119e-53	4.02934e-79	1.87893	0.932	0.554	1.03095e-74	1.17858e-118	1.86559	0.918	0.472	3.01552e-114
LIG1	8.50255e-65	1.85814	3.32313e-69	2.84365	0.768	0.204	8.50255e-65	7.65729e-100	2.5216	0.788	0.214	1.95919e-95	9.22673e-77	1.85814	0.664	0.236	2.36075e-72
CKAP5	1.97233e-67	1.85807	7.70861e-72	2.01323	1	0.797	1.97233e-67	2.88643e-95	1.85807	0.986	0.816	7.38523e-91	9.30544e-152	1.95578	0.991	0.764	2.38089e-147
HAUS8	2.59609e-39	1.85459	3.22409e-46	2.25957	0.563	0.136	8.24917e-42	1.01465e-43	1.85459	0.486	0.14	2.59609e-39	4.85353e-81	2.12096	0.485	0.118	1.24182e-76
POLE	7.33873e-52	1.8474	2.86826e-56	2.36297	0.824	0.313	7.33873e-52	2.85088e-90	2.21133	0.869	0.31	7.29425e-86	1.15895e-94	1.8474	0.801	0.311	2.9653e-90
CCDC74A	3.67554e-17	1.84488	1.43654e-21	2.08103	0.268	0.061	3.67554e-17	2.64586e-50	2.28547	0.378	0.079	6.76969e-46	2.39715e-33	1.84488	0.269	0.078	6.13335e-29
WDR76	1.78103e-53	1.8433	1.66102e-113	3.43006	0.599	0.066	4.24988e-109	2.38305e-113	2.71098	0.568	0.083	6.09728e-109	6.96096e-58	1.8433	0.459	0.138	1.78103e-53
CDC7	2.34888e-62	1.83019	9.18034e-67	2.58484	0.634	0.127	2.34888e-62	2.9379e-82	2.31694	0.64	0.146	7.51691e-78	4.89163e-67	1.83019	0.547	0.173	1.25157e-62
TUBG1	2.7423e-31	1.80992	1.0718e-35	1.80992	0.669	0.232	2.7423e-31	6.73509e-51	1.85789	0.635	0.221	1.72324e-46	2.26201e-97	2.11194	0.596	0.156	5.78758e-93
RFC5	9.8373e-41	1.80839	3.8448e-45	1.9343	0.803	0.306	9.8373e-41	1.23594e-74	2.06179	0.797	0.289	3.16228e-70	2.34243e-82	1.80839	0.708	0.262	5.99334e-78
PKN3	5.8172e-21	1.80816	2.27359e-25	1.80816	0.394	0.107	5.8172e-21	1.06736e-36	1.91376	0.36	0.091	2.73094e-32	1.65573e-43	1.96877	0.307	0.082	4.23635e-39
HELLS	6.31654e-63	1.79052	2.46875e-67	2.8484	0.88	0.361	6.31654e-63	2.36759e-78	2.38717	0.86	0.39	6.05771e-74	9.80408e-82	1.79052	0.854	0.448	2.50847e-77
AC097717.1	7.71686e-12	1.78759	3.01605e-16	1.78759	0.282	0.082	7.71686e-12	1.47343e-26	1.91555	0.293	0.081	3.76993e-22	7.34704e-64	2.15258	0.412	0.106	1.87981e-59
WRAP53	3.29629e-23	1.78612	1.28832e-27	2.01543	0.43	0.121	3.29629e-23	2.24855e-28	1.78612	0.356	0.108	5.75313e-24	7.19614e-48	1.88983	0.348	0.095	1.8412e-43
BUB3	3.06897e-60	1.78292	1.19947e-64	1.87091	0.986	0.723	3.06897e-60	1.20224e-86	1.78292	0.955	0.734	3.07605e-82	7.66397e-120	1.81147	0.956	0.658	1.9609e-115
RANGAP1	1.12768e-41	1.78289	4.40741e-46	1.89618	0.901	0.441	1.12768e-41	5.71614e-63	1.78289	0.86	0.441	1.46253e-58	5.4175e-93	1.78631	0.842	0.394	1.38612e-88
TUBA1C	1.46542e-53	1.78079	5.72742e-58	1.78079	0.993	0.922	1.46542e-53	2.48631e-93	1.97669	0.995	0.922	6.36147e-89	4.15101e-140	1.9994	0.994	0.859	1.06208e-135
TTF2	1.54207e-58	1.77512	6.027e-63	2.05529	0.944	0.477	1.54207e-58	2.75694e-86	1.89084	0.968	0.482	7.05391e-82	8.95414e-110	1.77512	0.924	0.454	2.29101e-105
RFWD3	2.6185e-39	1.77132	1.02341e-43	1.88536	0.845	0.407	2.6185e-39	1.9931e-64	1.82003	0.865	0.41	5.09955e-60	2.47291e-91	1.77132	0.854	0.385	6.3272e-87
NDE1	6.1773e-27	1.76951	2.41433e-31	1.77552	0.817	0.469	6.1773e-27	4.7001e-56	1.76951	0.842	0.467	1.20257e-51	3.99752e-87	1.88445	0.833	0.413	1.0228e-82
DDX39A	5.67212e-54	1.76484	2.21688e-58	2.07242	0.908	0.452	5.67212e-54	5.87029e-74	1.76484	0.932	0.512	1.50197e-69	1.21213e-110	1.8498	0.901	0.44	3.10136e-106
CDC25A	3.49367e-34	1.76191	7.95184e-46	2.2236	0.521	0.115	2.03456e-41	1.36546e-38	1.927	0.437	0.128	3.49367e-34	3.67722e-45	1.76191	0.401	0.128	9.40855e-41
CEP78	8.71529e-62	1.76152	3.40627e-66	2.05425	0.993	0.557	8.71529e-62	4.66056e-90	1.90943	0.968	0.57	1.19245e-85	1.28292e-119	1.76152	0.959	0.579	3.28247e-115
FAM110A	3.18836e-11	1.75852	1.24613e-15	1.83012	0.275	0.081	3.18836e-11	1.02888e-18	1.75852	0.252	0.08	2.63249e-14	6.03099e-70	2.30358	0.398	0.092	1.54309e-65
AL121944.1	1.36001e-10	1.7577	5.31544e-15	1.7577	0.282	0.088	1.36001e-10	6.60446e-45	2.12482	0.396	0.094	1.68982e-40	2.77012e-67	2.53586	0.327	0.066	7.08763e-63
LRRCC1	4.79624e-52	1.75589	1.87456e-56	2.17563	0.754	0.213	4.79624e-52	5.24116e-73	2.04127	0.775	0.258	1.341e-68	5.54925e-69	1.75589	0.64	0.234	1.41983e-64
LIN54	1.40608e-45	1.75555	5.49549e-50	1.85097	0.908	0.413	1.40608e-45	3.00603e-71	1.80842	0.887	0.416	7.69123e-67	8.422e-91	1.75555	0.854	0.4	2.15485e-86
LYPD6	1.62679e-33	1.75227	6.35813e-38	1.98362	0.514	0.129	1.62679e-33	2.43627e-50	1.93396	0.536	0.152	6.23344e-46	7.51479e-55	1.75227	0.509	0.169	1.92273e-50
RBL1	1.04092e-54	1.74894	4.06833e-59	2.55727	0.852	0.339	1.04092e-54	1.17566e-87	2.25317	0.869	0.327	3.00806e-83	9.19916e-91	1.74894	0.863	0.388	2.3537e-86
DBF4	2.65757e-42	1.74495	1.03868e-46	1.7745	0.923	0.611	2.65757e-42	2.6518e-70	1.74495	0.937	0.604	6.7849e-66	5.76161e-113	1.88989	0.93	0.53	1.47416e-108
SLX4	3.28746e-23	1.74321	1.28487e-27	2.05639	0.359	0.086	3.28746e-23	2.20295e-29	1.74321	0.369	0.113	5.63647e-25	3.38396e-32	1.77322	0.298	0.096	8.65819e-28
RAD51C	1.02008e-34	1.74079	3.98686e-39	1.83109	0.761	0.296	1.02008e-34	4.30164e-69	1.85983	0.815	0.316	1.10062e-64	2.59643e-78	1.74079	0.728	0.286	6.64323e-74
RMI1	1.2042e-39	1.73725	2.74386e-58	2.35061	0.761	0.224	7.02044e-54	4.70649e-44	1.73725	0.635	0.248	1.2042e-39	4.41276e-75	1.84966	0.629	0.21	1.12905e-70
PRIM2	7.29031e-55	1.73688	2.84933e-59	2.20493	0.915	0.472	7.29031e-55	3.92206e-75	1.9834	0.914	0.471	1.0035e-70	1.71256e-94	1.73688	0.906	0.503	4.38175e-90
DCK	8.17848e-32	1.73686	3.19647e-36	1.89164	0.648	0.22	8.17848e-32	1.25335e-49	1.77358	0.635	0.218	3.20682e-45	9.86269e-56	1.73686	0.482	0.153	2.52347e-51
SCML2	1.39958e-29	1.73375	5.47008e-34	2.29444	0.387	0.085	1.39958e-29	3.35617e-50	2.06202	0.428	0.098	8.5871e-46	2.47258e-46	1.73375	0.392	0.119	6.32635e-42
H2AFZ	2.95445e-64	1.72403	1.15471e-68	2.04523	0.979	0.892	2.95445e-64	4.13019e-108	1.94618	0.986	0.919	1.05675e-103	1.44623e-139	1.72403	0.982	0.893	3.70032e-135
C3orf67	1.09894e-29	1.71694	4.2951e-34	2.22207	0.324	0.059	1.09894e-29	1.98794e-48	2.51422	0.329	0.063	5.08633e-44	6.71054e-54	1.71694	0.409	0.114	1.71696e-49
USP1	5.78736e-68	1.69713	2.26193e-72	2.08983	0.993	0.579	5.78736e-68	1.10685e-83	1.88728	0.95	0.582	2.83198e-79	7.93151e-106	1.69713	0.939	0.546	2.02936e-101
CENPS	9.10646e-46	1.69354	3.55916e-50	2.10929	0.732	0.229	9.10646e-46	2.35441e-62	1.91719	0.725	0.252	6.02399e-58	3.78879e-63	1.69354	0.599	0.217	9.69399e-59
YBX2	3.80029e-21	1.68831	3.59756e-40	2.22081	0.472	0.106	9.20472e-36	1.4853e-25	1.68831	0.338	0.105	3.80029e-21	9.1241e-57	1.84234	0.433	0.124	2.33449e-52
IFT122	1.56688e-33	1.67452	6.12396e-38	2.0784	0.648	0.215	1.56688e-33	1.59783e-53	1.79424	0.662	0.22	4.0882e-49	5.04834e-49	1.67452	0.529	0.204	1.29167e-44
KMT5A	1.62025e-58	1.67396	6.33258e-63	1.81593	0.986	0.687	1.62025e-58	6.12803e-82	1.67396	0.977	0.687	1.56792e-77	1.12291e-149	1.9498	0.98	0.606	2.87307e-145
ITPKA	2.76304e-16	1.66884	1.0799e-20	1.66884	0.493	0.191	2.76304e-16	3.18456e-49	2.48058	0.541	0.17	8.14802e-45	5.66301e-62	2.59313	0.401	0.109	1.44894e-57
PRC1-AS1	3.03194e-19	1.66569	1.185e-23	1.85062	0.38	0.106	3.03194e-19	3.05455e-32	1.85686	0.36	0.101	7.81536e-28	3.31649e-32	1.66569	0.284	0.086	8.48556e-28
POLD3	2.26566e-38	1.66083	2.76689e-46	2.17317	0.845	0.447	7.07936e-42	8.85508e-43	1.68175	0.779	0.431	2.26566e-38	2.74137e-70	1.66083	0.813	0.412	7.01408e-66
RFC2	4.09905e-44	1.65715	1.60207e-48	2.42343	0.669	0.201	4.09905e-44	1.28779e-51	1.96167	0.635	0.221	3.29495e-47	4.44396e-50	1.65715	0.553	0.221	1.13703e-45
HIST1H2BC	4.06619e-19	1.63605	1.58922e-23	1.63605	0.43	0.132	4.06619e-19	6.78175e-41	2.11088	0.365	0.088	1.73518e-36	2.43139e-119	2.95367	0.43	0.067	6.22096e-115
RNF26	9.15783e-15	1.63006	3.57923e-19	1.63006	0.423	0.147	9.15783e-15	3.19584e-37	1.90945	0.446	0.136	8.17687e-33	1.86412e-65	2.20882	0.418	0.108	4.76953e-61
RAD18	1.20833e-42	1.61176	4.72264e-47	1.87415	0.873	0.394	1.20833e-42	2.24644e-71	1.90984	0.869	0.373	5.74775e-67	7.75899e-89	1.61176	0.871	0.389	1.98522e-84
NMU	3.29363e-34	1.61171	1.28728e-38	2.09254	0.732	0.289	3.29363e-34	3.25636e-48	1.61171	0.761	0.324	8.33171e-44	1.37423e-67	1.79045	0.652	0.25	3.5161e-63
RHNO1	4.51904e-26	1.6096	1.76622e-30	1.72212	0.592	0.201	4.51904e-26	5.91753e-36	1.6096	0.55	0.201	1.51406e-31	4.43536e-80	2.03347	0.541	0.15	1.13483e-75
RAD21	9.05596e-67	1.60747	3.53942e-71	1.73136	1	0.931	9.05596e-67	1.95436e-98	1.671	0.995	0.926	5.00043e-94	5.7768e-145	1.60747	1	0.91	1.47805e-140
ASRGL1	2.15038e-42	1.60116	8.40453e-47	2.17288	0.627	0.172	2.15038e-42	8.89185e-66	2.00138	0.689	0.214	2.27507e-61	1.3824e-60	1.60116	0.596	0.213	3.53701e-56
UHRF1	1.43775e-81	1.59664	4.09525e-110	3.02942	0.725	0.107	1.04781e-105	5.38525e-99	2.25187	0.667	0.133	1.37787e-94	5.61928e-86	1.59664	0.602	0.163	1.43775e-81
CNTLN	5.18016e-65	1.58915	3.25144e-87	2.76355	0.725	0.132	8.31914e-83	2.02461e-69	2.2116	0.662	0.187	5.18016e-65	7.43783e-70	1.58915	0.673	0.242	1.90304e-65
PPP2R3B	1.68513e-13	1.58417	6.58613e-18	1.58417	0.38	0.127	1.68513e-13	3.30976e-45	1.93911	0.468	0.126	8.46836e-41	2.34375e-56	2.06941	0.371	0.095	5.99672e-52
C9orf40	5.87712e-13	1.58406	2.29701e-17	1.58406	0.401	0.144	5.87712e-13	7.76762e-35	1.73978	0.441	0.138	1.98742e-30	1.74017e-40	1.72375	0.377	0.123	4.4524e-36
KIAA1841	2.71789e-35	1.58245	1.06226e-39	1.91556	0.817	0.367	2.71789e-35	3.17454e-52	1.79148	0.793	0.358	8.12237e-48	1.96491e-73	1.58245	0.792	0.338	5.02743e-69
PCNA	5.84888e-34	1.58075	2.28597e-38	2.1641	0.81	0.428	5.84888e-34	8.45216e-44	1.79785	0.793	0.464	2.16257e-39	1.38159e-48	1.58075	0.766	0.486	3.53494e-44
METTL4	3.33454e-32	1.5774	1.30327e-36	1.79249	0.732	0.282	3.33454e-32	3.67649e-56	1.69513	0.766	0.289	9.40667e-52	2.4175e-62	1.5774	0.684	0.287	6.18541e-58
GINS2	1.27959e-43	1.57712	9.90642e-91	3.01715	0.613	0.088	2.53466e-86	6.39982e-91	2.29105	0.568	0.101	1.63746e-86	5.00114e-48	1.57712	0.424	0.13	1.27959e-43
CEP295	7.84727e-33	1.57286	3.06702e-37	1.64577	0.838	0.477	7.84727e-33	7.88574e-59	1.57286	0.901	0.475	2.01765e-54	4.93406e-93	1.70377	0.877	0.422	1.26243e-88
GLA	9.80629e-20	1.57261	3.83268e-24	1.61439	0.5	0.168	9.80629e-20	3.59729e-32	1.57261	0.477	0.165	9.20403e-28	1.8664e-53	1.70965	0.453	0.141	4.77538e-49
H2AFV	8.22569e-72	1.54749	3.21492e-76	1.8079	1	0.891	8.22569e-72	3.59698e-104	1.58216	1	0.919	9.20322e-100	8.44477e-148	1.54749	1	0.904	2.16068e-143
NDC1	2.55666e-48	1.5463	9.99241e-53	1.86749	0.923	0.443	2.55666e-48	3.80454e-60	1.5463	0.901	0.466	9.73431e-56	1.26913e-90	1.67827	0.871	0.417	3.2472e-86
CABLES2	5.71737e-22	1.54293	2.23457e-26	1.94301	0.401	0.109	5.71737e-22	1.95964e-29	1.65285	0.383	0.119	5.01394e-25	1.22548e-28	1.54293	0.298	0.101	3.13551e-24
WEE1	6.54459e-36	1.54254	2.55788e-40	1.74637	0.866	0.428	6.54459e-36	3.18373e-64	1.69993	0.91	0.445	8.14588e-60	3.3747e-83	1.54254	0.93	0.527	8.63451e-79
TONSL	1.3127e-17	1.53699	5.13054e-22	1.76262	0.401	0.123	1.3127e-17	3.51497e-40	1.8344	0.423	0.114	8.9934e-36	1.83044e-26	1.53699	0.295	0.106	4.68335e-22
DONSON	4.59818e-22	1.53552	1.79715e-26	1.81427	0.592	0.239	4.59818e-22	1.32727e-39	1.63226	0.604	0.227	3.39595e-35	4.77417e-41	1.53552	0.512	0.216	1.22152e-36
COCH	1.09319e-13	1.5347	4.27263e-18	1.70695	0.345	0.109	1.09319e-13	1.75163e-43	2.00812	0.437	0.117	4.48173e-39	3.17091e-26	1.5347	0.342	0.136	8.11309e-22
MDC1	2.16993e-20	1.53386	8.48094e-25	1.53386	0.599	0.233	2.16993e-20	1.72966e-51	1.77354	0.671	0.238	4.42551e-47	6.66789e-73	1.79289	0.652	0.234	1.70605e-68
TMEM107	8.14566e-15	1.53266	3.18364e-19	1.53266	0.401	0.131	8.14566e-15	3.57645e-45	2.03062	0.432	0.111	9.1507e-41	1.45481e-29	1.65725	0.298	0.1	3.72228e-25
UBL7-AS1	3.36263e-16	1.53015	1.31425e-20	1.53015	0.486	0.175	3.36263e-16	2.85145e-47	1.78802	0.554	0.168	7.29573e-43	8.84068e-61	1.743	0.497	0.152	2.26198e-56
OAS3	1.83779e-42	1.52559	7.18278e-47	1.94974	0.669	0.183	1.83779e-42	1.08003e-49	1.8401	0.644	0.228	2.76337e-45	5.06544e-48	1.52559	0.573	0.235	1.29604e-43
AC068587.4	3.21075e-12	1.52507	1.25488e-16	1.98702	0.528	0.255	3.21075e-12	5.22597e-21	1.53724	0.5	0.237	1.33712e-16	2.99964e-32	1.52507	0.564	0.293	7.67489e-28
TBCD	4.8305e-28	1.52111	1.88795e-32	1.53961	0.88	0.583	4.8305e-28	1.41893e-52	1.52111	0.91	0.612	3.63047e-48	4.31982e-89	1.69854	0.93	0.597	1.10527e-84
CDK2	1.96798e-37	1.51833	1.05009e-44	2.09959	0.662	0.199	2.68675e-40	8.23387e-56	1.90633	0.613	0.187	2.10672e-51	7.69161e-42	1.51833	0.447	0.16	1.96798e-37
GPAT3	5.0732e-13	1.51487	1.9828e-17	1.69556	0.444	0.177	5.0732e-13	6.40161e-20	1.53426	0.5	0.246	1.63792e-15	2.24331e-34	1.51487	0.541	0.256	5.73973e-30
ODF2	5.46217e-20	1.51382	2.13483e-24	1.51382	0.725	0.39	5.46217e-20	2.40851e-49	1.62188	0.802	0.381	6.16242e-45	1.53637e-79	1.63073	0.813	0.363	3.93095e-75
CEP192	3.65947e-52	1.49957	1.43026e-56	1.6742	0.986	0.763	3.65947e-52	4.07832e-75	1.50827	0.973	0.777	1.04348e-70	6.68744e-114	1.49957	0.988	0.766	1.71105e-109
AL080276.2	2.36836e-08	1.49891	9.25645e-13	1.49891	0.268	0.088	2.36836e-08	1.98045e-19	1.56703	0.275	0.088	5.06719e-15	1.17327e-31	1.73036	0.284	0.088	3.00194e-27
TMEM106C	1.06814e-58	1.49589	4.17472e-63	2.00463	0.979	0.764	1.06814e-58	5.7262e-99	1.95285	0.977	0.781	1.46511e-94	1.15497e-84	1.49589	0.947	0.748	2.95512e-80
MCM7	4.49524e-48	1.49344	1.63471e-61	2.39132	0.831	0.281	4.18257e-57	2.52115e-64	1.89846	0.766	0.282	6.4506e-60	1.75691e-52	1.49344	0.667	0.3	4.49524e-48
GMNN	4.62336e-45	1.49209	1.80699e-49	1.98163	0.852	0.396	4.62336e-45	1.52198e-53	1.57203	0.842	0.431	3.89414e-49	9.51339e-64	1.49209	0.74	0.336	2.4341e-59
RASSF1	1.9531e-21	1.48435	7.63348e-26	1.48435	0.662	0.282	1.9531e-21	8.66808e-40	1.66364	0.613	0.242	2.21781e-35	1.29067e-58	1.63625	0.596	0.226	3.30232e-54
PCNT	3.068e-49	1.48312	1.19909e-53	1.78381	0.944	0.488	3.068e-49	6.22163e-57	1.57904	0.878	0.473	1.59187e-52	1.27547e-79	1.48312	0.868	0.424	3.26341e-75
REEP4	9.28822e-15	1.48271	3.6302e-19	1.50215	0.528	0.221	9.28822e-15	1.29759e-31	1.48271	0.541	0.213	3.32001e-27	1.89449e-51	1.78726	0.474	0.162	4.84724e-47
TMEM237	1.09499e-36	1.48108	4.27963e-41	1.80931	0.69	0.219	1.09499e-36	5.88531e-62	1.83102	0.703	0.222	1.50582e-57	2.38249e-64	1.48108	0.69	0.273	6.09584e-60
PHTF2	7.61427e-36	1.48104	2.97595e-40	1.61852	0.915	0.528	7.61427e-36	2.01743e-58	1.59266	0.905	0.511	5.16179e-54	1.72392e-73	1.48104	0.863	0.472	4.41082e-69
DNMT1	1.82099e-55	1.48103	7.11715e-60	2.20228	0.951	0.566	1.82099e-55	3.80482e-68	1.85457	0.91	0.624	9.73502e-64	7.37869e-67	1.48103	0.883	0.609	1.88791e-62
MOXD1	1.14288e-17	1.47459	4.46681e-22	2.04735	0.331	0.088	1.14288e-17	7.35902e-31	1.88906	0.333	0.091	1.88288e-26	5.29723e-27	1.47459	0.368	0.152	1.35535e-22
RCCD1	1.13323e-18	1.47289	4.42911e-23	1.47289	0.627	0.272	1.13323e-18	4.2008e-41	1.53079	0.662	0.261	1.07482e-36	3.69525e-59	1.7323	0.576	0.215	9.45468e-55
HYLS1	1.62395e-13	1.46841	6.34701e-18	1.46841	0.444	0.165	1.62395e-13	1.4866e-23	1.70323	0.387	0.145	3.80362e-19	3.7073e-48	1.94703	0.386	0.116	9.4855e-44
CNTRL	4.68554e-25	1.46664	1.83129e-29	1.72637	0.768	0.388	4.68554e-25	4.31185e-40	1.46664	0.793	0.405	1.10323e-35	8.02633e-64	1.47013	0.833	0.441	2.05362e-59
ZDHHC12	8.58765e-18	1.46412	3.35639e-22	1.53895	0.669	0.349	8.58765e-18	1.52502e-61	1.78451	0.82	0.369	3.90192e-57	7.88866e-53	1.46412	0.637	0.269	2.01839e-48
MAP2	3.67032e-15	1.46362	1.4345e-19	2.00063	0.296	0.078	3.67032e-15	6.90709e-23	1.54201	0.306	0.095	1.76725e-18	1.27932e-56	1.46362	0.696	0.309	3.27327e-52
UBR7	2.49162e-23	1.4632	9.73822e-28	1.82807	0.613	0.25	2.49162e-23	3.04816e-47	1.64316	0.703	0.273	7.79902e-43	3.21187e-41	1.4632	0.523	0.218	8.2179e-37
POLE2	1.44378e-35	1.46281	5.64287e-40	2.0758	0.662	0.221	1.44378e-35	4.32893e-58	2.0422	0.644	0.204	1.1076e-53	8.98874e-52	1.46281	0.594	0.233	2.29986e-47
XRCC3	1.54376e-35	1.45664	2.64215e-43	2.04678	0.641	0.185	6.76019e-39	5.97475e-43	1.74811	0.572	0.194	1.5287e-38	6.03359e-40	1.45664	0.482	0.186	1.54376e-35
FBF1	1.58112e-12	1.45649	6.17963e-17	1.53767	0.366	0.123	1.58112e-12	1.73076e-41	1.67633	0.486	0.141	4.42833e-37	1.86897e-27	1.45649	0.333	0.125	4.78194e-23
ALG10	5.53252e-11	1.45599	2.16232e-15	1.48112	0.387	0.144	5.53252e-11	3.57056e-26	1.58841	0.396	0.137	9.13564e-22	7.65367e-28	1.45599	0.33	0.123	1.95827e-23
RPA3	4.21193e-43	1.45426	1.64618e-47	1.78376	0.901	0.474	4.21193e-43	8.76062e-49	1.54417	0.838	0.486	2.24149e-44	1.07707e-71	1.45426	0.842	0.427	2.7558e-67
SRGAP2C	7.61512e-28	1.45302	2.97628e-32	1.57725	0.775	0.357	7.61512e-28	6.9368e-48	1.55961	0.77	0.338	1.77485e-43	1.02407e-62	1.45302	0.763	0.354	2.62019e-58
CBX5	3.77493e-74	1.45113	1.47539e-78	1.79403	1	0.922	3.77493e-74	3.70377e-117	1.68304	1	0.931	9.47647e-113	1.27811e-157	1.45113	0.997	0.937	3.27017e-153
SAP30	3.90267e-20	1.44822	1.52531e-24	1.44822	0.697	0.324	3.90267e-20	1.98295e-42	1.5789	0.698	0.299	5.07356e-38	3.83596e-45	1.49877	0.553	0.227	9.81469e-41
AC091212.1	1.17423e-07	1.44803	4.58936e-12	1.44803	0.282	0.099	1.17423e-07	2.1393e-21	1.45289	0.311	0.102	5.47361e-17	1.4156e-35	1.52448	0.404	0.151	3.62195e-31
ZNF273	5.60956e-11	1.44782	2.19243e-15	1.57281	0.345	0.119	5.60956e-11	1.32767e-28	1.70342	0.356	0.106	3.39697e-24	3.84707e-23	1.44782	0.281	0.105	9.8431e-19
CEP57L1	1.31321e-17	1.44277	5.13252e-22	1.44277	0.648	0.3	1.31321e-17	2.78055e-39	1.51603	0.712	0.307	7.11432e-35	1.67763e-58	1.47042	0.67	0.275	4.29237e-54
MGME1	5.65458e-30	1.44243	2.21003e-34	1.74455	0.796	0.372	5.65458e-30	8.62539e-37	1.44243	0.77	0.404	2.20689e-32	1.00046e-101	1.90837	0.909	0.483	2.55978e-97
JADE1	2.14899e-22	1.44097	8.3991e-27	1.57848	0.718	0.336	2.14899e-22	1.97627e-40	1.44097	0.748	0.341	5.05648e-36	6.65475e-62	1.50649	0.737	0.34	1.70268e-57
RMI2	1.09143e-20	1.43846	4.60735e-40	2.21485	0.458	0.101	1.17884e-35	6.56794e-49	2.01581	0.419	0.096	1.68047e-44	4.26574e-25	1.43846	0.269	0.092	1.09143e-20
MCM4	5.16836e-44	1.43803	2.02e-48	2.33234	0.725	0.251	5.16836e-44	9.26269e-54	1.89575	0.721	0.293	2.36995e-49	9.78717e-49	1.43803	0.664	0.307	2.50415e-44
CCDC77	3.74631e-26	1.43436	1.46421e-30	1.60306	0.662	0.251	3.74631e-26	7.15084e-46	1.6235	0.685	0.258	1.82961e-41	4.52766e-44	1.43436	0.529	0.208	1.15845e-39
NUP107	7.40942e-50	1.4338	2.89589e-54	1.62934	0.979	0.691	7.40942e-50	3.34701e-82	1.66254	0.973	0.676	8.56366e-78	5.05379e-97	1.4338	0.959	0.687	1.29306e-92
PDE3B	9.35789e-18	1.43276	3.65743e-22	1.58772	0.472	0.162	9.35789e-18	1.03371e-31	1.59101	0.495	0.173	2.64486e-27	6.35621e-41	1.43276	0.494	0.189	1.6263e-36
CMC2	1.54016e-43	1.42931	6.01955e-48	1.58632	0.951	0.561	1.54016e-43	4.89236e-63	1.59945	0.887	0.582	1.25176e-58	5.4212e-63	1.42931	0.833	0.485	1.38707e-58
SPIN4	2.54847e-14	1.4219	9.96042e-19	1.6232	0.423	0.151	2.54847e-14	3.20386e-20	1.4219	0.356	0.133	8.19739e-16	1.25479e-29	1.57327	0.313	0.107	3.21051e-25
CHAF1B	7.99369e-18	1.41383	8.66846e-48	2.26837	0.606	0.154	2.21791e-43	3.12425e-22	1.5472	0.419	0.17	7.99369e-18	1.57627e-33	1.41383	0.474	0.205	4.03304e-29
SUV39H2	1.71412e-15	1.41295	6.69943e-20	1.41295	0.563	0.238	1.71412e-15	1.28185e-45	1.52527	0.658	0.231	3.27973e-41	5.89809e-59	1.6456	0.579	0.211	1.50908e-54
ARL6IP1	2.27287e-17	1.39371	8.88325e-22	1.39371	0.993	0.952	2.27287e-17	1.513e-45	1.52684	0.995	0.934	3.87116e-41	4.64778e-82	1.87546	0.98	0.889	1.18918e-77
STRIP2	2.61099e-19	1.38496	1.02048e-23	1.55165	0.585	0.235	2.61099e-19	3.18326e-30	1.38496	0.586	0.249	8.14469e-26	3.14994e-35	1.44747	0.456	0.184	8.05945e-31
SKA2	1.22672e-39	1.38363	4.7945e-44	1.55475	0.951	0.604	1.22672e-39	2.08774e-55	1.38363	0.914	0.616	5.34169e-51	3.74151e-86	1.45173	0.933	0.613	9.57303e-82
HMGN2	1.34139e-53	1.37943	5.24266e-58	1.66625	0.986	0.896	1.34139e-53	1.63348e-81	1.49684	0.995	0.928	4.17943e-77	1.21218e-106	1.37943	0.988	0.889	3.10149e-102
HAUS5	2.00906e-24	1.37377	7.41257e-61	2.4796	0.627	0.135	1.89658e-56	9.30371e-48	2.00493	0.491	0.136	2.38045e-43	7.85219e-29	1.37377	0.377	0.148	2.00906e-24
ERI2	2.18212e-25	1.37369	8.52856e-30	1.60612	0.69	0.292	2.18212e-25	3.27878e-43	1.48792	0.703	0.295	8.3891e-39	5.26413e-52	1.37369	0.617	0.251	1.34688e-47
SRGAP2	3.44181e-26	1.37354	1.34519e-30	1.53584	0.81	0.443	3.44181e-26	1.00334e-50	1.60354	0.833	0.421	2.56715e-46	1.08688e-55	1.37354	0.816	0.497	2.7809e-51
SMC1A	1.02769e-53	1.37222	4.01662e-58	1.73173	0.993	0.715	1.02769e-53	1.32058e-82	1.61902	0.986	0.73	3.37883e-78	9.45458e-80	1.37222	0.927	0.707	2.41905e-75
POLD1	1.45355e-18	1.37222	1.07168e-42	2.42038	0.479	0.106	2.742e-38	9.51957e-29	1.87699	0.356	0.108	2.43568e-24	5.68102e-23	1.37222	0.313	0.125	1.45355e-18
CEP131	7.61503e-10	1.37021	2.97625e-14	1.58792	0.331	0.118	7.61503e-10	7.35179e-28	1.66209	0.387	0.126	1.88103e-23	3.34126e-26	1.37021	0.319	0.118	8.54896e-22
CSE1L	5.68702e-44	1.34787	2.22271e-48	1.51441	0.972	0.707	5.68702e-44	4.82422e-73	1.46009	0.982	0.712	1.23432e-68	6.38848e-95	1.34787	0.982	0.687	1.63456e-90
SRGAP2B	5.76018e-19	1.34236	2.2513e-23	1.34236	0.697	0.321	5.76018e-19	2.38846e-45	1.52776	0.721	0.29	6.11111e-41	1.31073e-54	1.36257	0.719	0.328	3.35365e-50
MMS22L	4.57057e-34	1.34037	1.78635e-38	1.77929	0.908	0.589	4.57057e-34	1.54794e-52	1.59186	0.901	0.585	3.96056e-48	5.90968e-68	1.34037	0.93	0.608	1.51205e-63
TIAM1	4.37131e-29	1.33814	7.06479e-38	1.80177	0.789	0.331	1.8076e-33	1.70848e-33	1.33814	0.766	0.394	4.37131e-29	3.07679e-46	1.40412	0.693	0.357	7.87227e-42
SP4	1.11741e-08	1.33763	4.36728e-13	1.33763	0.338	0.125	1.11741e-08	3.51236e-27	1.66202	0.365	0.116	8.98672e-23	1.40724e-28	1.43629	0.336	0.124	3.60057e-24
ATRIP	8.99329e-11	1.33414	3.51492e-15	1.38771	0.394	0.148	8.99329e-11	4.53033e-24	1.33414	0.423	0.156	1.15913e-19	3.84938e-27	1.43409	0.336	0.129	9.84903e-23
PASK	5.75025e-18	1.32492	7.41184e-31	2.23362	0.394	0.095	1.89639e-26	2.24742e-22	1.55219	0.342	0.117	5.75025e-18	5.09111e-26	1.32492	0.383	0.161	1.30261e-21
XRCC1	2.30969e-18	1.32267	9.02716e-23	1.47057	0.577	0.231	2.30969e-18	2.37e-25	1.32267	0.532	0.232	6.06389e-21	1.14365e-33	1.35085	0.459	0.191	2.92613e-29
NUP85	5.34364e-14	1.32114	2.0885e-18	1.32114	0.634	0.317	5.34364e-14	1.53415e-33	1.32204	0.694	0.319	3.92528e-29	3.18972e-44	1.42863	0.596	0.269	8.16122e-40
AC092821.3	7.66155e-11	1.32027	2.99443e-15	1.80816	0.317	0.106	7.66155e-11	2.68911e-17	1.53755	0.27	0.093	6.88035e-13	2.62838e-22	1.32027	0.336	0.142	6.72498e-18
CEP112	2.14325e-17	1.31998	8.37665e-22	1.31998	0.782	0.414	2.14325e-17	8.6118e-43	1.50261	0.824	0.443	2.20342e-38	1.54308e-61	1.53677	0.851	0.511	3.94814e-57
CCDC34	2.68728e-16	1.31844	1.05029e-20	1.31844	0.718	0.361	2.68728e-16	5.75538e-39	1.40615	0.761	0.389	1.47257e-34	4.75088e-63	1.56726	0.69	0.28	1.21556e-58
PXMP2	1.35705e-12	1.31561	5.30387e-17	1.31561	0.62	0.322	1.35705e-12	3.34201e-47	1.62032	0.748	0.313	8.55086e-43	2.00996e-38	1.3187	0.561	0.25	5.14268e-34
TOPBP1	8.68781e-40	1.30765	3.39553e-44	1.70026	0.93	0.639	8.68781e-40	3.07249e-53	1.41133	0.914	0.633	7.86126e-49	1.5351e-72	1.30765	0.918	0.602	3.92771e-68
TMSB4Y	7.18722e-13	1.30716	2.80905e-17	1.66215	0.352	0.116	7.18722e-13	1.09406e-28	1.60676	0.414	0.139	2.79927e-24	7.24106e-19	1.30716	0.281	0.117	1.8527e-14
RNF144A	8.85612e-22	1.30571	3.46131e-26	1.77597	0.613	0.248	8.85612e-22	7.15241e-30	1.55563	0.631	0.303	1.83002e-25	5.81403e-46	1.30571	0.655	0.297	1.48758e-41
RECQL	1.65838e-30	1.29394	6.48159e-35	1.68319	0.824	0.453	1.65838e-30	3.64285e-43	1.37532	0.829	0.459	9.32061e-39	4.9585e-46	1.29394	0.749	0.415	1.26868e-41
RNFT2	6.44721e-17	1.28305	2.51982e-21	1.71249	0.507	0.196	6.44721e-17	1.33981e-29	1.50071	0.599	0.273	3.42804e-25	8.82332e-37	1.28305	0.626	0.312	2.25754e-32
WDR34	1.25208e-39	1.27658	4.8936e-44	1.8012	0.866	0.424	1.25208e-39	4.7697e-51	1.5219	0.847	0.429	1.22038e-46	1.04001e-47	1.27658	0.749	0.391	2.66097e-43
PGP	1.67706e-28	1.27555	6.55462e-33	1.27555	0.901	0.583	1.67706e-28	2.98307e-56	1.35702	0.919	0.609	7.63247e-52	2.77415e-76	1.27777	0.915	0.549	7.09793e-72
CU638689.4	3.4229e-08	1.27419	1.3378e-12	1.28181	0.331	0.123	3.4229e-08	1.52242e-24	1.67414	0.338	0.109	3.89528e-20	1.43671e-23	1.27419	0.31	0.121	3.67598e-19
PRTFDC1	7.78959e-28	1.27378	3.04447e-32	1.74284	0.725	0.32	7.78959e-28	1.79612e-38	1.43942	0.748	0.362	4.59554e-34	8.6299e-54	1.27378	0.781	0.389	2.20805e-49
CEP44	3.91295e-11	1.26658	1.52933e-15	1.26658	0.662	0.407	3.91295e-11	6.21943e-35	1.27238	0.775	0.383	1.5913e-30	6.75524e-64	1.43468	0.772	0.35	1.7284e-59
ST3GAL3	8.69416e-16	1.26459	3.39801e-20	1.47023	0.549	0.223	8.69416e-16	3.62396e-27	1.26459	0.586	0.256	9.27226e-23	3.0926e-43	1.3501	0.623	0.279	7.91273e-39
DCLRE1A	2.1582e-12	1.26456	3.30019e-17	1.53309	0.408	0.147	8.44388e-13	8.43507e-17	1.26456	0.374	0.16	2.1582e-12	9.41119e-18	1.27091	0.298	0.133	2.40795e-13
MAD2L2	2.52212e-19	1.26377	4.54546e-26	1.61439	0.577	0.212	1.163e-21	9.85741e-24	1.33676	0.505	0.218	2.52212e-19	1.37186e-25	1.26377	0.427	0.195	3.51005e-21
ZNF184	0.000527056	1.26352	2.05994e-08	1.28027	0.31	0.142	0.000527056	4.23063e-21	1.40154	0.342	0.119	1.08245e-16	3.96753e-19	1.26352	0.289	0.121	1.01513e-14
CEP70	4.57827e-12	1.26301	1.78937e-16	1.26301	0.859	0.691	4.57827e-12	7.56193e-31	1.27687	0.86	0.677	1.9348e-26	2.1661e-55	1.38816	0.877	0.649	5.54219e-51
FAM161A	6.21136e-22	1.2627	1.26735e-29	1.95424	0.556	0.188	3.24264e-25	9.90345e-28	1.43922	0.495	0.191	2.5339e-23	2.42764e-26	1.2627	0.427	0.189	6.21136e-22
HP1BP3	5.60839e-51	1.25975	2.19198e-55	1.29236	1	0.987	5.60839e-51	2.46172e-84	1.25975	1	0.983	6.29855e-80	9.716e-135	1.36451	1	0.975	2.48594e-130
PRADC1	1.34799e-10	1.25362	5.26845e-15	1.25362	0.472	0.198	1.34799e-10	2.84227e-21	1.29031	0.455	0.192	7.27223e-17	9.19353e-30	1.54701	0.327	0.117	2.35226e-25
DCP2	1.80144e-32	1.25289	7.04071e-37	1.28646	0.944	0.72	1.80144e-32	5.98192e-53	1.25289	0.946	0.667	1.53053e-48	9.35398e-76	1.30975	0.944	0.631	2.39331e-71
SAE1	1.63924e-40	1.2493	6.40677e-45	1.52318	0.965	0.669	1.63924e-40	1.40922e-64	1.39244	0.968	0.696	3.60563e-60	8.87176e-69	1.2493	0.924	0.667	2.26993e-64
MCM2	2.07252e-20	1.24491	1.2743e-56	2.38397	0.556	0.109	3.26042e-52	2.92923e-52	1.95244	0.486	0.121	7.49473e-48	8.10022e-25	1.24491	0.357	0.145	2.07252e-20
SAC3D1	3.24116e-16	1.24458	1.26677e-20	1.49674	0.577	0.258	3.24116e-16	1.81884e-32	1.41585	0.613	0.258	4.65367e-28	1.0336e-31	1.24458	0.509	0.232	2.64457e-27
HAT1	1.84742e-30	1.24232	7.22043e-35	1.69062	0.824	0.46	1.84742e-30	2.80099e-39	1.49643	0.788	0.481	7.16661e-35	1.22377e-46	1.24232	0.845	0.562	3.13114e-42
NUCKS1	4.82284e-69	1.24135	1.88495e-73	1.42996	1	0.989	4.82284e-69	9.00607e-105	1.3235	1	0.99	2.30429e-100	1.13709e-137	1.24135	1	0.986	2.90937e-133
GPAT2	4.14404e-25	1.24098	2.64144e-40	2.07772	0.577	0.158	6.7584e-36	1.93152e-49	1.90982	0.586	0.184	4.94198e-45	1.61965e-29	1.24098	0.459	0.201	4.14404e-25
CCDC14	2.5252e-36	1.23473	9.86946e-41	1.40485	0.972	0.726	2.5252e-36	7.57778e-51	1.23473	0.95	0.699	1.93885e-46	1.1955e-77	1.3017	0.95	0.673	3.05881e-73
POLH	7.35576e-17	1.23006	2.87492e-21	1.40141	0.711	0.393	7.35576e-17	8.33884e-34	1.23006	0.766	0.391	2.13358e-29	6.1504e-42	1.27378	0.69	0.356	1.57364e-37
PRIMPOL	9.73605e-17	1.22925	3.80522e-21	1.39565	0.704	0.421	9.73605e-17	9.51889e-30	1.22925	0.743	0.392	2.4355e-25	8.87409e-50	1.25297	0.757	0.39	2.27052e-45
NEDD1	2.29445e-32	1.22741	8.9676e-37	1.46537	0.901	0.557	2.29445e-32	1.64406e-54	1.41791	0.914	0.546	4.20648e-50	4.65187e-62	1.22741	0.877	0.515	1.19023e-57
LBR	1.25135e-42	1.22334	4.89076e-47	1.28621	1	0.948	1.25135e-42	5.98943e-77	1.30234	0.995	0.951	1.53246e-72	2.78699e-110	1.22334	0.991	0.942	7.13081e-106
ZNF714	3.52419e-10	1.22256	1.37739e-14	1.22256	0.486	0.213	3.52419e-10	3.3823e-22	1.25263	0.482	0.205	8.65395e-18	5.65228e-55	1.52677	0.599	0.231	1.44619e-50
TLNRD1	3.02418e-14	1.22221	1.18197e-18	1.22221	0.697	0.383	3.02418e-14	1.97542e-40	1.41312	0.757	0.349	5.05432e-36	5.69923e-45	1.30781	0.681	0.334	1.45821e-40
CCDC88A	2.40547e-12	1.21255	9.40152e-17	1.32399	0.563	0.266	2.40547e-12	1.49502e-25	1.21255	0.631	0.308	3.82517e-21	1.10446e-35	1.36089	0.544	0.251	2.82587e-31
CEP97	3.82876e-13	1.21216	1.49643e-17	1.23718	0.613	0.297	3.82876e-13	5.69241e-27	1.21216	0.644	0.307	1.45646e-22	1.44686e-36	1.22349	0.579	0.267	3.70194e-32
ZMYM1	7.54568e-18	1.20971	2.94915e-22	1.20971	0.866	0.645	7.54568e-18	8.00338e-42	1.29144	0.892	0.615	2.04774e-37	4.42106e-73	1.40779	0.906	0.606	1.13117e-68
ACYP1	1.40666e-35	1.20706	5.49779e-40	1.59524	0.894	0.566	1.40666e-35	1.0378e-56	1.52686	0.896	0.551	2.65531e-52	3.02024e-47	1.20706	0.789	0.47	7.72759e-43
GPC1	3.45469e-05	1.20622	1.35023e-09	1.46238	0.275	0.111	3.45469e-05	2.76547e-14	1.20622	0.297	0.119	7.07573e-10	1.51098e-19	1.29422	0.284	0.116	3.86599e-15
IFI27L1	4.13205e-18	1.20327	3.81418e-24	1.51716	0.563	0.208	9.75896e-20	2.00442e-28	1.33889	0.532	0.21	5.1285e-24	1.61496e-22	1.20327	0.38	0.17	4.13205e-18
SLF1	1.8368e-29	1.2019	7.17891e-34	1.57277	0.782	0.339	1.8368e-29	1.93386e-44	1.47657	0.752	0.333	4.94798e-40	3.53833e-41	1.2019	0.667	0.323	9.05317e-37
SIVA1	6.83885e-40	1.19579	2.67289e-44	1.43038	0.958	0.796	6.83885e-40	1.4128e-70	1.37674	0.973	0.816	3.61479e-66	1.47241e-62	1.19579	0.947	0.753	3.7673e-58
AC004943.2	3.54147e-19	1.18431	1.38414e-23	1.58036	0.57	0.217	3.54147e-19	7.69948e-28	1.35321	0.554	0.234	1.96999e-23	1.48934e-36	1.18431	0.588	0.269	3.81062e-32
E2F1	3.089e-15	1.18108	7.25199e-40	2.44262	0.387	0.074	1.85549e-35	7.40643e-26	1.71303	0.293	0.082	1.89501e-21	1.2073e-19	1.18108	0.275	0.109	3.089e-15
CEP72	1.09593e-22	1.18058	4.28333e-27	1.29077	0.852	0.491	1.09593e-22	4.44244e-33	1.18058	0.811	0.456	1.13664e-28	1.2481e-53	1.24937	0.795	0.437	3.19339e-49
LINC01515	1.99584e-27	1.17545	7.80051e-32	1.37287	0.958	0.642	1.99584e-27	6.22523e-53	1.40283	0.973	0.624	1.59279e-48	1.19405e-67	1.17545	0.977	0.732	3.05509e-63
CEP120	2.08168e-18	1.17391	8.136e-23	1.3056	0.732	0.383	2.08168e-18	2.47479e-26	1.17391	0.716	0.381	6.33201e-22	1.11217e-57	1.47422	0.751	0.364	2.84559e-53
NT5DC2	8.48076e-11	1.17005	3.31461e-15	1.48076	0.43	0.177	8.48076e-11	7.29908e-22	1.30217	0.45	0.185	1.86754e-17	1.02354e-20	1.17005	0.363	0.165	2.61883e-16
TRIM59	3.50661e-07	1.1646	1.37052e-11	1.1646	0.662	0.438	3.50661e-07	1.00615e-26	1.35538	0.725	0.43	2.57433e-22	1.542e-56	1.58386	0.743	0.39	3.94537e-52
AC010538.1	0.000278312	1.16373	1.08775e-08	1.16373	0.31	0.138	0.000278312	2.02212e-16	1.25952	0.324	0.127	5.17378e-12	1.3237e-14	1.17486	0.266	0.121	3.38681e-10
FSBP	3.65759e-07	1.16226	1.18809e-11	1.32209	0.31	0.117	3.03985e-07	1.42953e-11	1.16226	0.275	0.119	3.65759e-07	1.67524e-19	1.41369	0.254	0.099	4.28628e-15
LAMTOR5-AS1	1.50938e-21	1.16112	5.89923e-26	1.3782	0.782	0.433	1.50938e-21	5.66473e-26	1.16112	0.752	0.433	1.44938e-21	4.1187e-54	1.26118	0.804	0.42	1.05381e-49
BUD13	2.31714e-10	1.15804	9.05626e-15	1.4237	0.472	0.209	2.31714e-10	4.01759e-23	1.32325	0.477	0.197	1.02794e-18	1.39216e-21	1.15804	0.368	0.165	3.56197e-17
UBALD2	1.12703e-24	1.15678	4.40487e-29	1.15678	0.979	0.779	1.12703e-24	1.90409e-41	1.2314	0.901	0.706	4.87181e-37	6.14291e-74	1.40098	0.904	0.661	1.57173e-69
B3GLCT	5.56786e-11	1.15484	2.17614e-15	1.30997	0.479	0.203	5.56786e-11	1.52792e-20	1.25352	0.446	0.189	3.90932e-16	3.02793e-25	1.15484	0.424	0.188	7.74726e-21
PAK6	1.49878e-09	1.15416	5.85781e-14	1.48441	0.38	0.15	1.49878e-09	9.88684e-15	1.15416	0.383	0.176	2.52965e-10	2.1663e-29	1.50539	0.363	0.14	5.5427e-25
DCLRE1C	1.25116e-16	1.15415	4.89001e-21	1.15415	0.796	0.453	1.25116e-16	1.23703e-41	1.41885	0.82	0.417	3.16507e-37	3.49784e-73	1.50799	0.807	0.385	8.94958e-69
TRIB3	4.89546e-05	1.15186	1.91333e-09	1.15186	0.648	0.475	4.89546e-05	3.45024e-13	1.21352	0.676	0.535	8.82777e-09	2.10188e-66	1.49819	0.895	0.653	5.37788e-62
NUP50	2.55329e-33	1.15035	9.97923e-38	1.23125	0.944	0.687	2.55329e-33	9.34827e-49	1.20087	0.928	0.665	2.39185e-44	9.37761e-64	1.15035	0.924	0.609	2.39936e-59
FBXL5	1.27024e-30	1.14962	4.9646e-35	1.18518	0.993	0.83	1.27024e-30	3.8419e-55	1.14962	0.977	0.821	9.82987e-51	4.81731e-83	1.2682	0.953	0.763	1.23256e-78
C2orf69	2.90523e-17	1.14852	1.13548e-21	1.29122	0.725	0.404	2.90523e-17	4.11536e-28	1.14852	0.739	0.414	1.05296e-23	3.88092e-53	1.22477	0.807	0.441	9.92972e-49
YWHAH	2.8546e-40	1.14747	1.11569e-44	1.57448	0.944	0.671	2.8546e-40	2.53929e-63	1.49586	0.919	0.68	6.49702e-59	8.29457e-57	1.14747	0.909	0.617	2.12225e-52
CCSAP	2.49588e-08	1.14624	9.75487e-13	1.14624	0.521	0.256	2.49588e-08	9.99665e-37	1.46626	0.608	0.236	2.55774e-32	6.70777e-37	1.34877	0.518	0.221	1.71625e-32
TUBGCP3	3.60485e-31	1.14621	1.40892e-35	1.28397	0.951	0.717	3.60485e-31	2.54365e-44	1.16307	0.946	0.712	6.50819e-40	3.90953e-66	1.14621	0.959	0.697	1.00029e-61
LIN52	1.00047e-29	1.13942	5.68741e-38	1.73737	0.817	0.346	1.45518e-33	3.91022e-34	1.2649	0.775	0.412	1.00047e-29	2.00553e-42	1.13942	0.737	0.38	5.13135e-38
TDP1	1.15831e-11	1.13657	4.52714e-16	1.13657	0.669	0.377	1.15831e-11	7.14728e-31	1.23421	0.73	0.377	1.8287e-26	3.17628e-66	1.46758	0.749	0.326	8.12684e-62
HMGB1	4.87777e-62	1.13488	1.90642e-66	1.53742	1	0.997	4.87777e-62	2.51335e-97	1.35459	0.995	0.999	6.43065e-93	1.1457e-129	1.13488	1	0.998	2.93139e-125
MCUB	3.04209e-22	1.13252	1.18897e-26	1.71731	0.697	0.317	3.04209e-22	2.53746e-36	1.45042	0.716	0.356	6.49235e-32	1.07397e-28	1.13252	0.611	0.351	2.74785e-24
CFAP161	8.84976e-07	1.13072	3.45883e-11	1.13072	0.324	0.127	8.84976e-07	1.68172e-18	1.48129	0.32	0.117	4.30284e-14	4.5382e-25	1.29698	0.345	0.138	1.16114e-20
LSM3	1.28005e-31	1.11431	5.00292e-36	1.21866	0.965	0.772	1.28005e-31	2.00673e-60	1.21019	0.964	0.795	5.13442e-56	7.89335e-67	1.11431	0.95	0.712	2.01959e-62
MNS1	1.0327e-14	1.1139	4.03619e-19	1.36339	0.655	0.332	1.0327e-14	2.74162e-22	1.1139	0.653	0.338	7.01471e-18	1.16486e-38	1.22305	0.67	0.34	2.9804e-34
CEP89	3.89053e-10	1.11073	1.52057e-14	1.11073	0.676	0.391	3.89053e-10	6.07182e-26	1.16395	0.707	0.395	1.55354e-21	3.66058e-42	1.15988	0.696	0.345	9.36595e-38
BTG3	2.10003e-29	1.10886	8.20773e-34	1.64455	0.824	0.429	2.10003e-29	7.40797e-36	1.41634	0.779	0.419	1.8954e-31	1.54378e-36	1.10886	0.722	0.416	3.94991e-32
CCP110	9.88475e-15	1.10745	3.86334e-19	1.31916	0.669	0.36	9.88475e-15	1.98577e-19	1.10745	0.635	0.366	5.0808e-15	3.90845e-42	1.19785	0.673	0.336	1.00002e-37
CRNDE	1.29433e-45	1.10663	5.05873e-50	1.53849	0.972	0.71	1.29433e-45	7.81156e-62	1.32404	0.977	0.762	1.99867e-57	2.45054e-79	1.10663	0.974	0.772	6.26995e-75
CALM3	2.33558e-20	1.10426	9.12835e-25	1.15602	0.937	0.711	2.33558e-20	3.35436e-42	1.11381	0.923	0.722	8.58246e-38	3.1265e-50	1.10426	0.868	0.633	7.99946e-46
KCTD9	9.45272e-18	1.10422	3.69449e-22	1.23733	0.754	0.405	9.45272e-18	3.61186e-24	1.10422	0.707	0.398	9.2413e-20	2.87145e-40	1.22176	0.664	0.34	7.34689e-36
MDM1	1.93917e-05	1.10383	7.57902e-10	1.10383	0.437	0.221	1.93917e-05	1.95527e-20	1.11424	0.527	0.244	5.00274e-16	8.70443e-30	1.11886	0.515	0.239	2.22712e-25
NDOR1	0.000995169	1.09899	3.8895e-08	1.24374	0.275	0.12	0.000995169	2.09617e-11	1.09899	0.302	0.138	5.36326e-07	9.83358e-22	1.3619	0.295	0.117	2.51602e-17
HAUS1	6.63501e-19	1.09641	2.59322e-23	1.57798	0.683	0.349	6.63501e-19	1.14114e-36	1.37911	0.757	0.392	2.91971e-32	4.47916e-31	1.09641	0.637	0.343	1.14604e-26
SLF2	1.09012e-22	1.08998	4.26059e-27	1.40212	0.852	0.577	1.09012e-22	4.45705e-37	1.23604	0.851	0.585	1.14038e-32	8.71617e-41	1.08998	0.839	0.585	2.23012e-36
FADS1	1.85176e-25	1.08702	7.2374e-30	1.33978	0.873	0.586	1.85176e-25	3.3724e-35	1.13718	0.865	0.598	8.62863e-31	1.80245e-41	1.08702	0.845	0.575	4.61175e-37
LRRC20	6.1851e-08	1.07699	4.41302e-17	1.47777	0.401	0.143	1.12911e-12	2.41738e-12	1.07699	0.347	0.162	6.1851e-08	9.39462e-20	1.26144	0.319	0.138	2.40371e-15
HAUS6	1.49003e-21	1.0762	5.82363e-26	1.25839	0.824	0.468	1.49003e-21	9.59438e-36	1.1647	0.856	0.519	2.45482e-31	4.07617e-39	1.0762	0.746	0.42	1.04293e-34
DEK	3.44166e-64	1.07556	1.34513e-68	1.45187	0.993	0.984	3.44166e-64	9.42464e-103	1.35585	1	0.975	2.41139e-98	7.84534e-115	1.07556	1	0.98	2.00731e-110
TMEM154	3.32282e-13	1.07466	1.29869e-17	1.38793	0.655	0.352	3.32282e-13	3.36001e-22	1.31542	0.644	0.367	8.59691e-18	8.6673e-19	1.07466	0.611	0.403	2.21762e-14
COQ2	5.10138e-07	1.07415	1.99382e-11	1.07415	0.5	0.252	5.10138e-07	2.70456e-28	1.28311	0.622	0.287	6.91989e-24	7.71558e-35	1.27295	0.535	0.243	1.97411e-30
ZNF473	0.000573613	1.06842	2.2419e-08	1.06842	0.324	0.149	0.000573613	6.06969e-12	1.08819	0.306	0.137	1.55299e-07	3.42872e-15	1.12247	0.263	0.116	8.77272e-11
ALYREF	8.46666e-32	1.06815	3.3091e-36	1.34589	0.93	0.72	8.46666e-32	4.36543e-50	1.20085	0.937	0.743	1.11694e-45	2.52758e-52	1.06815	0.906	0.685	6.46707e-48
HLTF	2.20134e-25	1.06694	8.60369e-30	1.12546	0.965	0.708	2.20134e-25	1.21452e-40	1.06922	0.941	0.731	3.10747e-36	9.32099e-56	1.06694	0.933	0.693	2.38487e-51
PROSER3	8.97085e-06	1.05748	3.50616e-10	1.05748	0.444	0.219	8.97085e-06	6.58924e-20	1.31826	0.441	0.193	1.68592e-15	1.44561e-24	1.15712	0.418	0.188	3.69874e-20
BRD8	1.27281e-13	1.05611	4.97464e-18	1.30858	0.725	0.485	1.27281e-13	1.89344e-26	1.05611	0.784	0.485	4.84456e-22	1.18117e-47	1.28609	0.754	0.435	3.02214e-43
AC011043.1	2.02059e-06	1.05573	7.89726e-11	1.05573	0.472	0.234	2.02059e-06	4.98988e-16	1.07666	0.437	0.203	1.27671e-11	2.29265e-27	1.31128	0.427	0.188	5.86599e-23
IL17RB	1.19102e-08	1.05371	1.84993e-18	1.7739	0.366	0.119	4.73323e-14	8.70434e-21	1.49186	0.351	0.127	2.22709e-16	4.65495e-13	1.05371	0.304	0.156	1.19102e-08
RHEB	3.1688e-49	1.05111	1.23849e-53	1.26083	0.986	0.891	3.1688e-49	2.3696e-73	1.20664	1	0.902	6.06287e-69	7.65727e-88	1.05111	0.994	0.867	1.95919e-83
EXOSC8	2.51716e-24	1.04918	9.83802e-29	1.34223	0.873	0.524	2.51716e-24	5.12431e-29	1.04918	0.851	0.591	1.31111e-24	1.56187e-48	1.07215	0.871	0.545	3.9962e-44
TBCCD1	1.46973e-05	1.04844	5.74427e-10	1.20132	0.359	0.161	1.46973e-05	7.60909e-11	1.04844	0.333	0.162	1.94686e-06	1.62496e-16	1.19039	0.307	0.143	4.15763e-12
WDR53	2.07436e-07	1.03898	2.52044e-16	1.44474	0.401	0.146	6.4488e-12	8.1074e-12	1.03898	0.338	0.16	2.07436e-07	7.93572e-16	1.05345	0.301	0.14	2.03043e-11
EREG	2.57562e-13	1.038	1.00665e-17	1.3521	0.817	0.583	2.57562e-13	1.15047e-29	1.42435	0.829	0.606	2.94359e-25	3.00828e-37	1.038	0.906	0.738	7.69698e-33
CMTM1	4.43798e-08	1.03537	1.73454e-12	1.03537	0.655	0.389	4.43798e-08	2.9984e-27	1.15372	0.707	0.373	7.67171e-23	2.16267e-40	1.06248	0.687	0.333	5.53342e-36
CDAN1	0.000153692	1.0342	6.00689e-09	1.20812	0.331	0.151	0.000153692	8.59253e-10	1.0342	0.315	0.159	2.19849e-05	3.01958e-25	1.33902	0.342	0.136	7.72589e-21
SMC3	9.50707e-43	1.03361	3.71573e-47	1.28606	0.979	0.851	9.50707e-43	2.31539e-52	1.08151	0.973	0.864	5.92416e-48	8.64811e-68	1.03361	0.977	0.832	2.2127e-63
PPP2R5D	2.53326e-10	1.03031	9.90096e-15	1.22439	0.521	0.244	2.53326e-10	1.3928e-16	1.03031	0.477	0.232	3.56362e-12	1.45559e-32	1.32776	0.477	0.207	3.72428e-28
ING1	2.84959e-05	1.02892	1.11373e-09	1.02892	0.521	0.299	2.84959e-05	1.198e-20	1.10439	0.563	0.275	3.0652e-16	4.40165e-28	1.21881	0.468	0.216	1.12621e-23
SMIM29	0.00249252	1.02403	9.74172e-08	1.02403	0.451	0.263	0.00249252	1.27465e-21	1.19003	0.604	0.312	3.26132e-17	6.38203e-35	1.24972	0.529	0.236	1.63291e-30
AC009630.1	2.81066e-05	1.02294	1.09852e-09	1.20704	0.282	0.111	2.81066e-05	8.90329e-14	1.09334	0.293	0.117	2.278e-09	7.96917e-14	1.02294	0.251	0.113	2.03899e-09
PSIP1	1.75559e-42	1.01616	6.86154e-47	1.33415	0.993	0.763	1.75559e-42	1.65034e-54	1.19366	0.964	0.776	4.22255e-50	5.15291e-59	1.01616	0.956	0.786	1.31842e-54
CENPT	0.00046066	1.01047	1.80044e-08	1.01047	0.359	0.171	0.00046066	6.48898e-20	1.29156	0.378	0.146	1.66027e-15	2.23558e-14	1.07583	0.289	0.139	5.71994e-10
TOE1	0.00153718	1.0104	6.0079e-08	1.0104	0.345	0.167	0.00153718	2.88383e-17	1.26093	0.378	0.16	7.37857e-13	9.48029e-15	1.03772	0.278	0.127	2.42563e-10
DCAF15	2.4864e-08	1.00958	9.7178e-13	1.00958	0.606	0.332	2.4864e-08	7.77053e-41	1.39671	0.707	0.292	1.98817e-36	6.06476e-58	1.53373	0.632	0.251	1.55173e-53
FGFR1OP	4.48372e-20	1.00805	1.75241e-24	1.00805	0.944	0.72	4.48372e-20	8.30787e-36	1.03291	0.919	0.713	2.12565e-31	7.11678e-53	1.08753	0.915	0.688	1.8209e-48
GOT1	8.64623e-28	1.00721	3.37928e-32	1.40477	0.937	0.636	8.64623e-28	4.61654e-33	1.09146	0.896	0.674	1.18119e-28	5.4152e-42	1.00721	0.906	0.668	1.38553e-37
TESK2	4.95843e-10	1.00699	1.93795e-14	1.10959	0.718	0.461	4.95843e-10	1.81081e-22	1.1847	0.716	0.449	4.63315e-18	2.25336e-30	1.00699	0.722	0.427	5.76546e-26
FOSL1	1.36717e-14	1.00668	5.34343e-19	1.25341	0.852	0.643	1.36717e-14	7.61361e-38	1.33326	0.914	0.692	1.94802e-33	2.59004e-36	1.00668	0.898	0.758	6.62689e-32
DGCR8	5.04506e-05	1.00624	1.9718e-09	1.00624	0.563	0.361	5.04506e-05	1.09471e-24	1.14618	0.658	0.34	2.80092e-20	3.2201e-45	1.26267	0.684	0.332	8.23894e-41
SMPD4	3.13452e-16	1.00608	1.22509e-20	1.25347	0.711	0.397	3.13452e-16	1.8351e-21	1.00608	0.694	0.406	4.69529e-17	4.93671e-45	1.09644	0.807	0.471	1.26311e-40
S100PBP	1.54129e-12	1.00531	2.4081e-18	1.21398	0.761	0.447	6.16137e-14	6.02395e-17	1.02107	0.667	0.426	1.54129e-12	6.76705e-28	1.00531	0.699	0.419	1.73142e-23
TENT4A	2.17222e-21	1.00328	8.48987e-26	1.05265	0.93	0.728	2.17222e-21	6.37653e-36	1.00328	0.905	0.724	1.6315e-31	5.4552e-56	1.08028	0.933	0.682	1.39577e-51
PIGK	1.26565e-06	1.00295	4.94664e-11	1.00295	0.535	0.285	1.26565e-06	1.26248e-24	1.10394	0.644	0.318	3.23019e-20	1.11848e-39	1.19189	0.629	0.296	2.86175e-35
MEX3D	0.00248673	0.999547	9.71909e-08	1.01124	0.408	0.225	0.00248673	1.58747e-12	1.07251	0.374	0.182	4.06169e-08	1.76327e-12	0.999547	0.278	0.138	4.51149e-08
PEA15	7.74702e-10	0.99796	3.02784e-14	1.19665	0.514	0.238	7.74702e-10	1.10881e-21	1.27311	0.486	0.214	2.837e-17	1.73205e-16	0.99796	0.383	0.197	4.43162e-12
PPIH	9.79932e-18	0.997144	3.82995e-22	1.15136	0.831	0.516	9.79932e-18	1.05001e-27	0.997144	0.815	0.517	2.68655e-23	1.169e-39	1.04067	0.775	0.441	2.99101e-35
TMEM14A	1.07896e-10	0.99274	4.21698e-15	0.99274	0.704	0.403	1.07896e-10	3.97921e-23	1.009	0.739	0.436	1.01812e-18	5.92134e-34	1.02965	0.69	0.389	1.51503e-29
USP13	9.67015e-10	0.991235	3.77947e-14	0.992936	0.739	0.475	9.67015e-10	1.07252e-21	1.08609	0.743	0.501	2.74415e-17	2.46848e-30	0.991235	0.746	0.476	6.31585e-26
ANKRD36	3.32686e-14	0.989398	1.30026e-18	1.20291	0.831	0.565	3.32686e-14	4.73779e-27	1.06713	0.815	0.586	1.21221e-22	9.44295e-44	0.989398	0.906	0.688	2.41607e-39
STAG1	7.15561e-34	0.984404	2.79669e-38	1.13533	0.993	0.956	7.15561e-34	6.54396e-62	1.15032	1	0.956	1.67434e-57	6.28266e-80	0.984404	0.994	0.972	1.60748e-75
ERI1	1.57734e-12	0.981257	6.16484e-17	0.981257	0.782	0.458	1.57734e-12	1.18702e-27	1.17752	0.743	0.443	3.03711e-23	1.52794e-36	1.05786	0.696	0.373	3.90939e-32
DDB2	3.34591e-15	0.979907	1.30771e-19	1.03513	0.887	0.595	3.34591e-15	1.248e-28	1.27339	0.833	0.582	3.19313e-24	3.30617e-22	0.979907	0.719	0.511	8.45917e-18
SFXN5	0.000217215	0.977737	8.48959e-09	1.08803	0.451	0.249	0.000217215	5.4864e-14	0.977737	0.532	0.297	1.40375e-09	5.07042e-31	1.1345	0.591	0.301	1.29732e-26
SLC25A40	2.20728e-15	0.977202	4.21328e-20	1.13563	0.768	0.435	1.07801e-15	8.6269e-20	0.977202	0.698	0.417	2.20728e-15	1.50704e-32	1.08472	0.655	0.356	3.85592e-28
POC5	0.000501484	0.976957	1.96e-08	0.976957	0.549	0.354	0.000501484	3.42416e-35	1.55779	0.68	0.333	8.76106e-31	9.24406e-85	1.88867	0.716	0.275	2.36519e-80
PLP2	1.27445e-27	0.97493	4.98105e-32	1.06197	0.979	0.767	1.27445e-27	2.22116e-43	1.14085	0.946	0.732	5.68307e-39	3.94692e-45	0.97493	0.918	0.734	1.00986e-40
EXOSC9	2.20289e-13	0.974117	8.60975e-18	1.16131	0.641	0.319	2.20289e-13	1.0266e-21	1.14859	0.626	0.343	2.62665e-17	1.33185e-21	0.974117	0.567	0.335	3.40768e-17
GSTCD	3.28395e-11	0.972073	1.2835e-15	0.972073	0.81	0.574	3.28395e-11	1.22033e-31	1.08556	0.878	0.582	3.12233e-27	8.67943e-57	1.17224	0.889	0.53	2.22072e-52
XRCC4	1.09498e-10	0.971527	4.27961e-15	0.971527	0.873	0.66	1.09498e-10	6.33849e-29	0.980895	0.896	0.629	1.62177e-24	4.60126e-46	1.13879	0.822	0.489	1.17728e-41
PMM1	1.56627e-05	0.968646	6.12161e-10	1.00534	0.479	0.249	1.56627e-05	2.26046e-16	1.03442	0.464	0.22	5.78361e-12	2.71978e-16	0.968646	0.383	0.198	6.95883e-12
TMEM158	0.000597371	0.967909	2.33476e-08	0.967909	0.599	0.407	0.000597371	2.67057e-18	1.37203	0.613	0.38	6.83293e-14	6.37723e-32	1.52895	0.596	0.33	1.63168e-27
PTPDC1	1.38225e-06	0.967579	5.40237e-11	1.08565	0.542	0.295	1.38225e-06	9.63384e-17	0.967579	0.577	0.308	2.46491e-12	5.93188e-28	0.981472	0.605	0.316	1.51773e-23
FN3KRP	1.03012e-07	0.965744	4.0261e-12	0.965744	0.606	0.336	1.03012e-07	9.38169e-27	1.14533	0.667	0.328	2.4004e-22	1.22961e-22	0.98793	0.526	0.283	3.14609e-18
NUP205	7.69478e-24	0.965616	9.65954e-31	1.31687	0.859	0.472	2.47149e-26	3.00742e-28	1.00884	0.824	0.479	7.69478e-24	4.54797e-36	0.965616	0.784	0.478	1.16364e-31
PXMP4	0.00824509	0.963972	3.2225e-07	0.963972	0.423	0.244	0.00824509	1.29863e-21	1.2513	0.495	0.222	3.32267e-17	7.98792e-22	1.10004	0.421	0.203	2.04379e-17
SP2	1.59014e-11	0.962701	6.21487e-16	1.11491	0.683	0.394	1.59014e-11	4.95197e-18	0.962701	0.644	0.376	1.26701e-13	4.51681e-39	1.11975	0.675	0.339	1.15567e-34
MCM5	5.04221e-11	0.962439	7.91848e-50	2.01032	0.542	0.111	2.02602e-45	2.45913e-43	1.66152	0.45	0.118	6.29193e-39	1.97069e-15	0.962439	0.325	0.158	5.04221e-11
POLA1	1.05126e-13	0.957856	4.10875e-18	1.48274	0.775	0.59	1.05126e-13	3.50459e-20	1.30721	0.739	0.582	8.96685e-16	2.4183e-23	0.957856	0.778	0.61	6.18746e-19
TUBD1	1.26753e-05	0.956493	4.954e-10	0.956493	0.521	0.282	1.26753e-05	2.85551e-30	1.30957	0.599	0.251	7.30611e-26	7.15095e-45	1.39992	0.57	0.237	1.82964e-40
YEATS4	6.20438e-24	0.956127	2.42491e-28	1.01789	0.965	0.71	6.20438e-24	7.59027e-31	0.956127	0.905	0.726	1.94205e-26	1.69919e-49	1.12181	0.889	0.615	4.34755e-45
TPRKB	4.7855e-12	0.955859	1.87036e-16	1.01222	0.775	0.513	4.7855e-12	9.39966e-22	0.955859	0.779	0.536	2.405e-17	1.80092e-39	1.01305	0.807	0.486	4.60783e-35
TCOF1	2.74562e-15	0.952933	1.0731e-19	1.28228	0.704	0.389	2.74562e-15	1.95774e-34	1.21624	0.766	0.386	5.00907e-30	4.00822e-29	0.952933	0.675	0.392	1.02554e-24
SSX2IP	3.11687e-23	0.950614	2.35761e-32	1.51683	0.81	0.421	6.03218e-28	6.08158e-30	1.1175	0.797	0.457	1.55603e-25	1.21819e-27	0.950614	0.699	0.43	3.11687e-23
MFGE8	5.95477e-05	0.947727	2.32735e-09	1.125	0.324	0.142	5.95477e-05	2.48039e-12	1.09059	0.32	0.144	6.34633e-08	2.89116e-10	0.947727	0.278	0.152	7.39731e-06
AP002762.2	2.13549e-09	0.947655	8.34634e-14	1.35171	0.408	0.167	2.13549e-09	2.08309e-15	1.17909	0.351	0.148	5.3298e-11	4.0493e-14	0.947655	0.316	0.156	1.03605e-09
NFATC2IP	2.74904e-12	0.9473	1.07443e-16	0.9473	0.866	0.638	2.74904e-12	3.42205e-29	1.02075	0.851	0.625	8.75565e-25	2.63405e-38	0.989508	0.822	0.552	6.73949e-34
SUN2	0.000117462	0.946443	4.59087e-09	0.946443	0.599	0.373	0.000117462	5.09729e-24	1.19728	0.649	0.344	1.30419e-19	4.72787e-56	1.73126	0.608	0.254	1.20967e-51
KIAA1328	1.51947e-16	0.945905	5.93866e-21	1.04163	0.901	0.549	1.51947e-16	1.65525e-23	0.945905	0.806	0.52	4.23513e-19	8.31827e-42	1.00307	0.904	0.571	2.12831e-37
SLC1A4	3.51155e-10	0.944897	3.98941e-22	1.50336	0.641	0.301	1.02073e-17	1.37245e-14	1.07952	0.59	0.366	3.51155e-10	1.61004e-30	0.944897	0.757	0.468	4.11945e-26
UBASH3B	9.87693e-20	0.944471	3.86029e-24	1.3266	0.873	0.576	9.87693e-20	3.17194e-30	1.13482	0.86	0.573	8.11572e-26	2.90979e-31	0.944471	0.851	0.618	7.44499e-27
ZRANB3	1.09703e-12	0.942345	4.28761e-17	0.942345	0.852	0.565	1.09703e-12	6.57553e-21	0.943658	0.856	0.611	1.68242e-16	3.06213e-51	1.09258	0.921	0.707	7.83476e-47
COMMD4	2.01538e-17	0.940885	2.02136e-25	1.34834	0.768	0.403	5.17186e-21	1.75575e-22	1.0129	0.721	0.426	4.49226e-18	7.87688e-22	0.940885	0.57	0.333	2.01538e-17
PDIK1L	0.000633001	0.940689	2.47401e-08	0.974078	0.577	0.39	0.000633001	7.86662e-15	0.940689	0.64	0.416	2.01275e-10	3.39252e-22	1.042	0.544	0.313	8.6801e-18
ZSCAN16-AS1	0.00164867	0.940523	6.44362e-08	0.948051	0.359	0.177	0.00164867	1.8482e-09	0.940523	0.36	0.196	4.7288e-05	1.01331e-25	1.33729	0.371	0.155	2.59266e-21
GTF2A1	9.77683e-11	0.939692	3.82117e-15	0.939692	0.761	0.491	9.77683e-11	1.50101e-34	1.17089	0.833	0.492	3.84048e-30	9.82047e-36	1.14581	0.696	0.402	2.51266e-31
AC145207.5	0.000814296	0.939265	3.18258e-08	1.04463	0.345	0.166	0.000814296	3.42086e-11	0.985846	0.338	0.162	8.75262e-07	3.27899e-10	0.939265	0.275	0.149	8.38961e-06
NUP37	1.02622e-13	0.939106	4.01085e-18	0.939106	0.901	0.658	1.02622e-13	9.83276e-32	1.05701	0.892	0.678	2.51581e-27	9.83135e-53	1.10091	0.901	0.591	2.51545e-48
UACA	2.40118e-19	0.935076	9.38476e-24	0.935076	0.951	0.795	2.40118e-19	3.01912e-44	1.09085	0.959	0.751	7.72472e-40	5.2094e-47	0.943326	0.942	0.746	1.33288e-42
CKLF	2.89368e-25	0.930847	1.13096e-29	1.25366	0.908	0.648	2.89368e-25	1.42854e-40	1.17648	0.896	0.629	3.65506e-36	2.08901e-35	0.930847	0.839	0.586	5.34493e-31
RUSC1	1.00657e-08	0.930626	3.93408e-13	1.09795	0.549	0.28	1.00657e-08	4.07817e-23	1.13238	0.572	0.266	1.04344e-18	6.46642e-14	0.930626	0.363	0.194	1.6545e-09
MAGOHB	2.78044e-07	0.929889	1.0867e-11	0.929889	0.606	0.336	2.78044e-07	3.88568e-22	1.0817	0.662	0.366	9.94191e-18	1.15979e-46	1.21202	0.699	0.33	2.96745e-42
[truncated: 338 more rows]

## Sheet: Cluster_8
GENE	max.adj.pval	min.log2FC	IKK_ko_p_val	IKK_ko_avg_log2FC	IKK_ko_pct.1	IKK_ko_pct.2	IKK_ko_p_val_adj	IKK_ko_CLD_inh_p_val	IKK_ko_CLD_inh_avg_log2FC	IKK_ko_CLD_inh_pct.1	IKK_ko_CLD_inh_pct.2	IKK_ko_CLD_inh_p_val_adj	WT_p_val	WT_avg_log2FC	WT_pct.1	WT_pct.2	WT_p_val_adj
[truncated: 210 more rows]

[truncated: 1 more sheets: Cluster_9]
