# Supplementary material for: Tight Junction-high and CDH17-positive cell population is the Source of Colorectal Cancer Liver Metastases
Source: Research Square preprint supplement (doi:10.21203/rs.3.rs-6998644/v1), 2025-07-09
Supplement: Supplementary file 3 [file 5a622c4f903573d5a47b692c.xlsx]

## Sheet: README
Following sheets enclose Differential Expression Analysis (DEA) results over bulk RNAseq data samples, specifically per sheet:
*DEA was conducted with DESeq2 R package (v1.40.2) in all cases using custom scripts
AllData_Primary_Tumor	DEA results obtained from applying Wald test comparing IKKa KO vs IKKa WT (CT) data from primary tumors.
	All genes under test are listed and sorted in alphabetical order.
DEGs_Prim_IKKa_KO_vs_CT	Differentially Expressed Genes (DEGs) from previous analysis (IKKa KO vs IKKa WT in Primary Tumors) with following criteria: adj pval < 0.05 and abs (shrunken log FC) > 1.
	Genes are ranked from lowest to highest p-value.
AllData_Metastasis	DEA results obtained from applying Wald test for three comparisons:
	(i) IKKa KO vs IKKa WT (CT) in Metastasis samples
	(ii) Metastasis vs Primary data in IKKa WT condition
	(iii) Metastasis vs Primary data in IKKa KO condition
	All genes under test are listed and sorted in alphabetical order.
DEGs_IKKa_KOvsCT_in_Met	DEGs obtained from previous analysis with following criteria: adj pval < 0.05 and abs (shrunken log FC) > 1.Genes are ranked from lowest to highest p-value.
DEGs_Met_vs_Prim_inCT
DEGs_Met_vs_Prim_in_IKKa_KO
Sheets include following columns:
a) First 4 (Primary Tumor samples) or 10 (Primary and Metastasis samples) correspond to the scaled values of the normalized expression of each gene (Variance Stabilizing Transformation)
b) Following 7 columns provide gene information: symbol, entrez id, Ensembl id, genome coordinates and gene name. Information according to hg38 release 106 from Ensembl
c) Following 6 columns provide DEA results: log2FC, log2FC SE, p-value, adjusted p-value (FDR) and shrunken log2FC and corresponding SE*
* Shrinkage of the log FC was obtained using the apeglm R package (v1.22.1)

## Sheet: AllData_Primary_Tumor
CT1B	CT2B	K1B	K2B	gene_name	Entrez	gene_id	chrom	start	end	gene_description	log2FoldChange KO_IKKa_vs_CT	lfcSE KO_IKKa_vs_CT	P_Value KO_IKKa_vs_CT	Adjusted_P_Value KO_IKKa_vs_CT	Shrunken_lFC KO_IKKa_vs_CT	Shrunken_lFCSE KO_IKKa_vs_CT
0.234719	-0.670843	1.31346	-0.877332	A1BG-AS1	503538	ENSG00000268895	19	58347718	58355455	A1BG antisense RNA 1	0.0465458	0.614253	0.939597	0.969471	0.0109402	0.292635
0.951232	0.773687	-0.795772	-0.929146	A1CF	29974	ENSG00000148584	10	50799409	50885675	APOBEC1 complementation factor	-1.29068	0.132482	1.98931e-22	5.99372e-21	-1.26617	0.133414
0.677137	-0.657407	1.01705	-1.03678	A2M-AS1	144571	ENSG00000245105	12	9065163	9068689	A2M antisense RNA 1	-0.010529	1.81531	0.995372		-0.000219756	0.327103
-0.358842	-0.297161	-0.805082	1.46109	A4GALT	53947	ENSG00000128274	22	42692121	42721298	alpha 1,4-galactosyltransferase (P blood group)	0.0833025	0.162615	0.608463	0.746457	0.0676976	0.146883
-1.33092	0.0872885	0.148664	1.09496	AAAS	8086	ENSG00000094914	12	53307456	53324864	aladin WD repeat nucleoporin	0.243014	0.113328	0.0320052	0.0769836	0.222276	0.110137
1.17664	0.193731	-1.25044	-0.119928	AACS	65985	ENSG00000081760	12	125065434	125143333	acetoacetyl-CoA synthetase	-0.0895937	0.0659888	0.174556	0.304783	-0.0861692	0.064826
0.325109	0.474828	0.683751	-1.48369	AADAC	13	ENSG00000114771	3	151814073	151828488	arylacetamide deacetylase	-0.503389	1.19482	0.67353		-0.0358525	0.323126
-0.0128182	0.324128	1.03731	-1.34862	AADACP1	201651	ENSG00000240602	3	151770416	151784901	arylacetamide deacetylase pseudogene 1	-0.086505	0.539807	0.872683	0.930889	-0.0233755	0.284067
-1.21929	-0.388982	0.989534	0.618741	AADAT	51166	ENSG00000109576	4	170060222	170091699	aminoadipate aminotransferase	0.501459	0.145173	0.000551883	0.00215456	0.4568	0.145166
-0.778093	-0.839019	0.370895	1.24622	AAGAB	79719	ENSG00000103591	15	67200667	67255195	alpha and gamma adaptin binding protein	0.19332	0.0688242	0.00497112	0.015413	0.186483	0.0679043
1.14172	0.507622	-0.626392	-1.02295	AAK1	22848	ENSG00000115977	2	69457997	69674349	AP2 associated kinase 1	-0.485731	0.102769	2.28505e-06	1.39585e-05	-0.463105	0.102692
0.600772	0.821985	-1.40105	-0.0217073	AAMDC	28971	ENSG00000087884	11	77821109	77918432	adipogenesis associated Mth938 domain containing	-0.266809	0.292766	0.362117	0.525008	-0.15707	0.234513
-0.667525	-0.621217	-0.173575	1.46232	AAMP	14	ENSG00000127837	2	218264129	218270178	angio associated migratory cell protein	0.118141	0.0640329	0.0650363	0.138606	0.113947	0.0630518
-1.27032	-0.273354	0.526783	1.01689	AAR2	25980	ENSG00000131043	20	36236131	36270918	AAR2 splicing factor	0.125808	0.0923221	0.172973	0.302708	0.117237	0.0895209
0.782	0.945366	-0.825848	-0.901518	AARS1	16	ENSG00000090861	16	70251983	70289707	alanyl-tRNA synthetase 1	-0.709242	0.0578598	1.5232e-34	9.64506e-33	-0.702607	0.0579717
-0.876491	-0.85549	0.862696	0.869285	AARS2	57505	ENSG00000124608	6	44298731	44313347	alanyl-tRNA synthetase 2, mitochondrial	0.333928	0.115322	0.00378429	0.0120894	0.308138	0.113431
-0.189711	-1.10357	1.32113	-0.0278485	AARSD1	80755	ENSG00000266967	17	42950526	42964498	alanyl-tRNA synthetase domain containing 1	0.56338	0.434786	0.195057	0.332247	0.239895	0.324428
-0.103891	1.26351	-1.17997	0.020355	AARSD1P1	117981788	ENSG00000234969	X	74069276	74070832	AARSD1 pseudogene 1	-2.1178	2.51974	0.400638		-0.0365788	0.332887
1.023	0.569673	-0.371692	-1.22098	AASDH	132949	ENSG00000157426	4	56338287	56387508	aminoadipate-semialdehyde dehydrogenase	-0.21394	0.114235	0.0610948	0.131683	-0.194233	0.110357
-0.728194	-0.993655	0.859634	0.862214	AASDHPPT	60496	ENSG00000149313	11	106075501	106098699	aminoadipate-semialdehyde dehydrogenase-phosphopantetheinyl transferase	0.259703	0.0712223	0.000265962	0.00111398	0.25053	0.0705103
-0.746091	-0.974645	0.940837	0.779899	AASS	10157	ENSG00000008311	7	122064583	122144308	aminoadipate-semialdehyde synthase	0.447731	0.129317	0.000535655	0.00209593	0.412657	0.128565
0.0298164	-1.0364	-0.338838	1.34542	AATBC	284837	ENSG00000215458	21	43805758	43812567	apoptosis associated transcript in bladder cancer	0.572767	0.943337	0.543737	0.694018	0.0651655	0.321687
-0.928388	-0.79909	0.924817	0.802661	AATF	26574	ENSG00000275700	17	36948925	37056871	apoptosis antagonizing transcription factor	0.291136	0.0764245	0.000139271	0.00061842	0.280279	0.0757335
0.928392	0.792517	-0.739539	-0.98137	AATK	9625	ENSG00000181409	17	81110487	81166221	apoptosis associated tyrosine kinase	-1.50483	0.430829	0.000477858	0.00188732	-1.24385	0.46729
-0.663679	1.37452	0.101509	-0.812352	ABALON	103021294	ENSG00000281376	20	31721507	31723409	apoptotic BCL2L1-antisense long non-coding RNA	-0.418939	0.962185	0.66327	0.786881	-0.0442874	0.318308
0.643287	0.804253	-0.0560602	-1.39148	ABAT	18	ENSG00000183044	16	8674596	8784575	4-aminobutyrate aminotransferase	-0.301405	0.274188	0.271653	0.426179	-0.189808	0.230122
0.756932	-1.4373	0.594907	0.0854636	ABCA1	19	ENSG00000165029	9	104781006	104928155	ATP binding cassette subfamily A member 1	0.2588	0.673435	0.700757	0.814436	0.0520537	0.302347
0.110972	1.37188	-0.7971	-0.685753	ABCA10	10349	ENSG00000154263	17	69147214	69244846	ATP binding cassette subfamily A member 10	-0.833535	0.383502	0.0297442	0.0723607	-0.52066	0.39637
-0.334475	-0.761718	-0.37578	1.47197	ABCA11P	79963	ENSG00000251595	4	425435	474129	ATP binding cassette subfamily A member 11, pseudogene	0.5387	1.03193	0.601648		0.0517425	0.321777
0.847208	0.881216	-0.786845	-0.941579	ABCA12	26154	ENSG00000144452	2	214931542	215138626	ATP binding cassette subfamily A member 12	-1.07805	0.138642	7.5007e-15	1.29246e-13	-1.04732	0.140008
0.91104	0.418862	0.0801123	-1.41001	ABCA13	154664	ENSG00000179869	7	48171458	48647497	ATP binding cassette subfamily A member 13	-0.683711	0.347593	0.0491847	0.110206	-0.42681	0.33833
-0.582494	-1.09829	0.985179	0.69561	ABCA2	20	ENSG00000107331	9	137007234	137028915	ATP binding cassette subfamily A member 2	0.261496	0.0822983	0.00148592	0.00528211	0.249702	0.0811973
-0.590191	-1.02471	1.19326	0.421641	ABCA3	21	ENSG00000167972	16	2275881	2340746	ATP binding cassette subfamily A member 3	0.511017	0.19953	0.0104341	0.0294549	0.427163	0.197581
0.594443	-1.15563	1.0401	-0.478916	ABCA3P1		ENSG00000257408	16	21938865	21944987		0.275635	1.23192	0.822957		0.0191114	0.32176
-0.989701	0.947313	0.770257	-0.727869	ABCA4	24	ENSG00000198691	1	93992834	94121148	ATP binding cassette subfamily A member 4	0.0302873	2.07402	0.988349		0.000818598	0.328459
1.26752	0.308099	-0.618724	-0.956895	ABCA5	23461	ENSG00000154265	17	69244311	69327244	ATP binding cassette subfamily A member 5	-0.47719	0.154527	0.00201462	0.00692447	-0.4266	0.153508
0.402219	0.958414	-1.3853	0.0246668	ABCA6	23460	ENSG00000154262	17	69078702	69141895	ATP binding cassette subfamily A member 6	-1.96958	2.56071	0.441802		-0.033241	0.332413
0.930402	0.788352	-0.72559	-0.993163	ABCA7	10347	ENSG00000064687	19	1039997	1065572	ATP binding cassette subfamily A member 7	-0.728056	0.12173	2.21911e-09	2.09452e-08	-0.698727	0.122688
0.718164	-0.197589	0.814352	-1.33493	ABCA9	10350	ENSG00000154258	17	68974488	69060949	ATP binding cassette subfamily A member 9	-0.385226	1.53718	0.802119		-0.017037	0.325685
1.32963	0.157838	-0.519158	-0.968314	ABCB1	5243	ENSG00000085563	7	87503017	87713323	ATP binding cassette subfamily B member 1	-0.821665	0.314231	0.00892685	0.0256462	-0.618436	0.329418
-0.730272	-0.980259	0.70891	1.00162	ABCB10	23456	ENSG00000135776	1	229516582	229558707	ATP binding cassette subfamily B member 10	0.412295	0.0820452	5.02877e-07	3.40006e-06	0.398288	0.081776
0.965736	0.0352034	-1.38511	0.38417	ABCB11	8647	ENSG00000073734	2	168915498	169031324	ATP binding cassette subfamily B member 11	-0.332573	0.840312	0.692273	0.808664	-0.0452923	0.312852
0.0101016	-1.35112	1.04147	0.299545	ABCB4	5244	ENSG00000005471	7	87401696	87480435	ATP binding cassette subfamily B member 4	0.632511	1.02974	0.539056		0.0612354	0.323842
0.005952	1.17198	0.0939107	-1.27185	ABCB6	10058	ENSG00000115657	2	219209772	219218994	ATP binding cassette subfamily B member 6 (Langereis blood group)	-0.191205	0.27108	0.480596	0.637724	-0.117215	0.217737
0.423547	1.02775	-0.129322	-1.32197	ABCB7	22	ENSG00000131269	X	75051048	75156732	ATP binding cassette subfamily B member 7	-0.0614952	0.110675	0.578457	0.722817	-0.0556183	0.105245
-1.32811	-0.144248	0.992483	0.479879	ABCB8	11194	ENSG00000197150	7	151028422	151047782	ATP binding cassette subfamily B member 8	0.134484	0.125046	0.28216	0.438644	0.118839	0.118378
-0.833187	-0.888072	0.726912	0.994347	ABCB9	23457	ENSG00000150967	12	122920951	122981649	ATP binding cassette subfamily B member 9	0.248169	0.168588	0.14101	0.258718	0.20426	0.157357
-0.625043	0.538215	1.11949	-1.03266	ABCC1	4363	ENSG00000103222	16	15949138	16143257	ATP binding cassette subfamily C member 1	0.00291769	0.0686361	0.966092	0.982039	0.00290315	0.0672328
0.862768	0.78066	-0.437153	-1.20627	ABCC10	89845	ENSG00000124574	6	43427366	43450427	ATP binding cassette subfamily C member 10	-0.23942	0.112919	0.033982	0.0810005	-0.218553	0.109631
0.538984	1.1401	-0.839543	-0.839543	ABCC11	85320	ENSG00000121270	16	48165773	48247568	ATP binding cassette subfamily C member 11	-4.8722	2.06886	0.0185222		-0.119181	0.361638
0.935526	0.776154	-0.686351	-1.02533	ABCC2	1244	ENSG00000023839	10	99782640	99852594	ATP binding cassette subfamily C member 2	-0.463934	0.0749859	6.13414e-10	6.20868e-09	-0.451818	0.0749456
1.05835	0.636121	-0.706472	-0.987999	ABCC3	8714	ENSG00000108846	17	50634777	50692253	ATP binding cassette subfamily C member 3	-0.676646	0.0660846	1.32489e-24	4.51593e-23	-0.667862	0.0662249
-0.756346	-0.969152	0.865303	0.860196	ABCC4	10257	ENSG00000125257	13	95019835	95301475	ATP binding cassette subfamily C member 4	0.55377	0.0841579	4.70048e-11	5.37587e-10	0.538943	0.0842861
-1.22838	-0.379048	0.637128	0.970298	ABCC5	10057	ENSG00000114770	3	183919934	184017939	ATP binding cassette subfamily C member 5	0.143746	0.109306	0.188483	0.323847	0.130747	0.10492
0.837804	0.833336	-0.513635	-1.1575	ABCC6	368	ENSG00000091262	16	16149565	16223522	ATP binding cassette subfamily C member 6	-0.803624	0.215247	0.00018884	0.000816648	-0.712597	0.220897
0.76746	0.939447	-0.66414	-1.04277	ABCC6P1	653190	ENSG00000256340	16	18571162	18598328	ATP binding cassette subfamily C member 6 pseudogene 1	-0.941456	0.262064	0.00032757	0.00134775	-0.814433	0.272821
-0.300931	1.47538	-0.440522	-0.733924	ABCC6P2	730013	ENSG00000255277	16	14820792	14824702	ATP binding cassette subfamily C member 6 pseudogene 2	-1.1675	1.07541	0.277642		-0.105043	0.340366
0.199037	1.31842	-0.946902	-0.570554	ABCD1	215	ENSG00000101986	X	153724856	153744755	ATP binding cassette subfamily D member 1	-0.187163	0.188171	0.319908	0.481005	-0.144555	0.168898
-0.799235	-0.882565	0.551008	1.13079	ABCD3	5825	ENSG00000117528	1	94418389	94518666	ATP binding cassette subfamily D member 3	0.0818974	0.0620346	0.186772	0.32144	0.0792695	0.0610631
1.23877	0.358312	-0.62284	-0.974238	ABCD4	5826	ENSG00000119688	14	74285269	74303055	ATP binding cassette subfamily D member 4	-0.325037	0.107394	0.00247327	0.00830304	-0.302583	0.105736
-1.039	-0.673211	0.82926	0.882949	ABCE1	6059	ENSG00000164163	4	145098288	145129524	ATP binding cassette subfamily E member 1	0.482119	0.0619283	6.96484e-15	1.20412e-13	0.474074	0.0619486
-0.910299	-0.80685	0.706837	1.01031	ABCF1	23	ENSG00000204574	6	30571393	30597179	ATP binding cassette subfamily F member 1	0.363839	0.0698487	1.89902e-07	1.37012e-06	0.353928	0.0695769
-1.04381	-0.613161	0.544122	1.11285	ABCF2	10061	ENSG00000033050	7	151211484	151227205	ATP binding cassette subfamily F member 2	0.529302	0.122639	1.58932e-05	8.36663e-05	0.497507	0.122903
-0.537282	-1.00603	0.267521	1.2758	ABCF3	55324	ENSG00000161204	3	184186095	184194012	ATP binding cassette subfamily F member 3	0.31015	0.106345	0.00354045	0.0113758	0.288753	0.104529
1.45972	-0.29293	-0.810018	-0.35677	ABCG1	9619	ENSG00000160179	21	42199689	42297244	ATP binding cassette subfamily G member 1	-0.939355	0.599348	0.117046	0.223215	-0.276145	0.406263
0.363859	-1.24799	-0.235907	1.12004	ABCG2	9429	ENSG00000118777	4	88090150	88231628	ATP binding cassette subfamily G member 2 (Junior blood group)	0.0366206	0.0902467	0.684902	0.803367	0.034207	0.0871128
-0.710666	1.0918	0.593741	-0.974879	ABCG5	64240	ENSG00000138075	2	43812472	43838865	ATP binding cassette subfamily G member 5	-0.0941514	0.638844	0.882834	0.936796	-0.0195846	0.29578
0.0313472	-1.37647	0.988529	0.356594	ABCG8	64241	ENSG00000143921	2	43831942	43882988	ATP binding cassette subfamily G member 8	0.364043	0.679532	0.592147	0.734151	0.0722581	0.307235
-0.775195	-0.870463	1.20182	0.443837	ABHD1	84696	ENSG00000143994	2	27123789	27130812	abhydrolase domain containing 1	2.4078	1.41784	0.0894668		0.139133	0.366184
-1.16461	-0.0910244	-0.0229818	1.27862	ABHD10	55347	ENSG00000144827	3	111979010	111993368	abhydrolase domain containing 10, depalmitoylase	0.135128	0.0908582	0.136953	0.253453	0.12642	0.0882562
1.1853	0.264704	-1.21169	-0.238311	ABHD11	83451	ENSG00000106077	7	73736094	73738852	abhydrolase domain containing 11	-0.361506	0.122918	0.00327126	0.010627	-0.331151	0.120931
1.03905	0.670442	-0.785166	-0.924331	ABHD11-AS1		ENSG00000225969	7	73735038	73736158		-1.72946	0.619644	0.00525362	0.0161923	-1.16877	0.757751
-0.742513	-0.845813	0.308424	1.2799	ABHD12	26090	ENSG00000100997	20	25294742	25390835	abhydrolase domain containing 12, lysophospholipase	0.177121	0.0819648	0.0306996	0.0742788	0.168146	0.0802926
-0.486699	0.550776	-1.14058	1.0765	ABHD12B	145447	ENSG00000131969	14	50872053	50904970	abhydrolase domain containing 12B	0.0161571	0.492131	0.973809	0.98594	0.0052949	0.275582
-0.732863	-0.389154	1.47807	-0.356055	ABHD13	84945	ENSG00000139826	13	108218392	108234243	abhydrolase domain containing 13	0.0515067	0.0977906	0.598399	0.738552	0.04753	0.0939497
0.98197	-1.26715	0.583843	-0.298667	ABHD14A	25864	ENSG00000248487	3	51971426	51981196	abhydrolase domain containing 14A	0.0430554	0.399689	0.914216	0.955864	0.0180747	0.255703
-1.37898	0.0493057	0.990378	0.339301	ABHD14A-ACY1	100526760	ENSG00000114786	3	51974706	51989183	ABHD14A-ACY1 readthrough	2.34439	2.31368	0.310931		0.0449624	0.333891
-1.14366	-0.413479	1.17147	0.385674	ABHD14B	84836	ENSG00000114779	3	51968510	51983409	abhydrolase domain containing 14B	0.414567	0.135148	0.00215859	0.00736086	0.376754	0.133844
-1.0027	-0.695043	0.66133	1.03641	ABHD15	116236	ENSG00000168792	17	29560547	29567037	abhydrolase domain containing 15	0.357936	0.131892	0.00665036	0.0198606	0.323498	0.129461
1.11069	0.411111	-0.292168	-1.22963	ABHD16A	7920	ENSG00000204427	6	31686955	31703356	abhydrolase domain containing 16A, phospholipase	-0.574426	0.292971	0.0499153	0.111586	-0.394167	0.281829
-1.35327	0.297164	0.0168402	1.03927	ABHD17A	81926	ENSG00000129968	19	1876810	1885496	abhydrolase domain containing 17A, depalmitoylase	0.0990353	0.14578	0.496917	0.652649	0.0837368	0.134551
0.440451	-1.40384	0.912487	0.0509068	ABHD17AP1		ENSG00000198658	1	148146395	148149566		0.98382	2.50141	0.694093		0.0174181	0.330348
-0.768547	-0.944678	0.699527	1.0137	ABHD17B	51104	ENSG00000107362	9	71862452	71911193	abhydrolase domain containing 17B, depalmitoylase	0.313654	0.106799	0.00331563	0.010751	0.292038	0.105051
1.13387	0.535322	-0.966233	-0.702962	ABHD17C	58489	ENSG00000136379	15	80679684	80755621	abhydrolase domain containing 17C, depalmitoylase	-0.194733	0.0627683	0.0019195	0.00662825	-0.188895	0.0620705
-0.418352	-1.09448	1.24772	0.265106	ABHD18	80167	ENSG00000164074	4	127965306	128039953	abhydrolase domain containing 18	0.194731	0.11516	0.0908441	0.182215	0.176303	0.110834
1.27883	-0.993177	0.267892	-0.553549	ABHD2	11057	ENSG00000140526	15	89087459	89202355	abhydrolase domain containing 2, acylglycerol lipase	-0.0314217	0.0696475	0.65188	0.778348	-0.030017	0.0681714
0.954666	0.760732	-0.996628	-0.718771	ABHD3	171586	ENSG00000158201	18	21650901	21704780	abhydrolase domain containing 3, phospholipase	-0.845474	0.0910279	1.57104e-20	4.13865e-19	-0.830194	0.0914022
0.891064	0.839712	-0.826043	-0.904733	ABHD4	63874	ENSG00000100439	14	22598290	22612963	abhydrolase domain containing 4, N-acyl phospholipase B	-0.455872	0.0835895	4.93316e-08	3.84219e-07	-0.441001	0.0834946
-0.71675	-0.889112	0.352178	1.25368	ABHD5	51099	ENSG00000011198	3	43690108	43734371	abhydrolase domain containing 5, lysophosphatidic acid acyltransferase	0.2049	0.0998439	0.0401502	0.0930961	0.190262	0.097148
-1.02575	-0.684159	0.949453	0.760459	ABHD6	57406	ENSG00000163686	3	58237532	58295693	abhydrolase domain containing 6, acylglycerol lipase	0.820363	0.118877	5.166e-12	6.62856e-11	0.794107	0.11995
0.678602	0.983652	-1.13966	-0.522597	ABHD8	79575	ENSG00000127220	19	17292131	17310236	abhydrolase domain containing 8	-0.699191	0.298207	0.019045	0.0494853	-0.51041	0.302483
0.897369	0.833797	-0.888408	-0.842759	ABI1	10006	ENSG00000136754	10	26746593	26861087	abl interactor 1	-0.183032	0.0712089	0.0101595	0.0287789	-0.175907	0.0701492
-0.662052	-0.893451	1.30389	0.251614	ABI2	10152	ENSG00000138443	2	203328280	203447728	abl interactor 2	0.225339	0.0725379	0.00189314	0.00654738	0.21699	0.0716356
0.753093	0.972025	-0.862559	-0.862559	ABI3BP	25890	ENSG00000154175	3	100749156	100993515	ABI family member 3 binding protein	-4.14355	2.386	0.0824559		-0.0703009	0.341724
-1.42366	0.505137	0.844087	0.0744379	ABITRAM	54942	ENSG00000119328	9	108934400	108950744	actin binding transcription modulator	0.0638735	0.0970867	0.510601	0.664742	0.0589464	0.0934163
-0.598032	-1.05006	1.12541	0.522679	ABL1	25	ENSG00000097007	9	130713016	130887675	ABL proto-oncogene 1, non-receptor tyrosine kinase	0.206465	0.0842764	0.0142912	0.038729	0.19586	0.082688
-0.017722	-0.282973	1.34918	-1.04849	ABL2	27	ENSG00000143322	1	179099330	179229684	ABL proto-oncogene 2, non-receptor tyrosine kinase	0.0189963	0.114409	0.868127	0.927563	0.0171057	0.10823
-0.604937	-1.03729	1.14486	0.497364	ABLIM1	3983	ENSG00000099204	10	114431112	114768061	actin binding LIM protein 1	0.130916	0.0530812	0.0136507	0.0372329	0.127929	0.0525455
1.01642	-0.305548	0.544804	-1.25568	ABLIM2	84448	ENSG00000163995	4	7965310	8158832	actin binding LIM protein family member 2	-0.26222	0.457682	0.566691	0.71286	-0.0925445	0.279142
0.946512	0.779483	-0.922119	-0.803876	ABLIM3	22885	ENSG00000173210	5	149141483	149260542	actin binding LIM protein family member 3	-1.28063	0.199397	1.34016e-10	1.46086e-09	-1.22384	0.202605
-0.883974	-0.847765	0.880459	0.85128	ABO	28	ENSG00000175164	9	133233278	133276024	ABO, alpha 1-3-N-acetylgalactosaminyltransferase and alpha 1-3-galactosyltransferase	0.205978	0.0974249	0.0344962	0.0819778	0.191946	0.0949626
1.14227	0.506083	-1.02489	-0.623455	ABR	29	ENSG00000159842	17	1003519	1229738	ABR activator of RhoGEF and GTPase	-0.21988	0.0729843	0.00258935	0.00863319	-0.211315	0.0720069
0.18638	1.22337	-1.19218	-0.217572	ABRACL	58527	ENSG00000146386	6	139028745	139043302	ABRA C-terminal like	-0.114182	0.0791224	0.148991	0.269927	-0.108374	0.0772853
-1.04113	-0.582562	1.17135	0.452333	ABRAXAS1	84142	ENSG00000163322	4	83459517	83523348	abraxas 1, BRCA1 A complex subunit	0.116108	0.125457	0.354716	0.517021	0.102356	0.118381
-1.13375	-0.280246	0.14292	1.27108	ABRAXAS2	23172	ENSG00000165660	10	124801819	124836667	abraxas 2, BRISC complex subunit	0.0778775	0.112319	0.488082	0.6446	0.0701724	0.106773
-1.16406	-0.49608	0.728032	0.932111	ABT1	29777	ENSG00000146109	6	26596953	26600739	activator of basal transcription 1	0.351296	0.110242	0.00143968	0.0051318	0.327166	0.108908
0.873256	0.856352	-0.929266	-0.800342	ABTB1	80325	ENSG00000114626	3	127672935	127680926	ankyrin repeat and BTB domain containing 1	-1.69673	0.147212	9.78697e-31	4.88627e-29	-1.67257	0.147969
-0.85087	-0.847896	1.08833	0.610438	ABTB2	25841	ENSG00000166016	11	34150987	34358010	ankyrin repeat and BTB domain containing 2	0.477757	0.13021	0.000243371	0.00102709	0.441928	0.129901
0.685808	1.02433	-0.950237	-0.759906	ACAA1	30	ENSG00000060971	3	38103129	38137242	acetyl-CoA acyltransferase 1	-0.289784	0.0794434	0.000264616	0.00110924	-0.278176	0.0786526
-1.41264	-0.00458834	0.717172	0.700059	ACAA2	10449	ENSG00000167315	18	49782164	49813953	acetyl-CoA acyltransferase 2	0.31373	0.1131	0.00553851	0.0169163	0.289567	0.111147
-0.264389	-1.22054	1.15349	0.33144	ACACA	31	ENSG00000278540	17	37084992	37406836	acetyl-CoA carboxylase alpha	0.220275	0.0681557	0.00122952	0.00445504	0.212917	0.0673731
1.15449	0.2422	-0.135704	-1.26098	ACACB	32	ENSG00000076555	12	109116587	109268226	acetyl-CoA carboxylase beta	-0.132724	0.118939	0.264465	0.418018	-0.118211	0.11308
0.740204	0.976746	-0.748692	-0.968259	ACAD10	80724	ENSG00000111271	12	111686053	111757107	acyl-CoA dehydrogenase family member 10	-0.426878	0.11043	0.00011082	0.000500942	-0.401093	0.109903
0.669128	0.648612	-1.45365	0.13591	ACAD11	84129	ENSG00000240303	3	132558138	132660082	acyl-CoA dehydrogenase family member 11	-0.434235	0.551214	0.430826	0.591431	-0.121319	0.305465
1.00024	0.0907461	-1.38101	0.290025	ACAD8	27034	ENSG00000151498	11	134253548	134265855	acyl-CoA dehydrogenase family member 8	-0.1289	0.123889	0.298131	0.456995	-0.113818	0.117155
-0.947051	-0.760969	0.673246	1.03478	ACAD9	28976	ENSG00000177646	3	128879596	128924003	acyl-CoA dehydrogenase family member 9	0.49079	0.0989108	6.97903e-07	4.60645e-06	0.470069	0.0989149
-1.19703	-0.40631	0.560116	1.04322	ACADM	34	ENSG00000117054	1	75724431	75787575	acyl-CoA dehydrogenase medium chain	0.146206	0.0751814	0.0518093	0.115028	0.139702	0.0737578
-0.361407	0.927065	-1.24459	0.678927	ACADS	35	ENSG00000122971	12	120725774	120740008	acyl-CoA dehydrogenase short chain	-0.0362943	0.115754	0.753865	0.850569	-0.0323484	0.109414
-0.90598	-0.790832	0.60945	1.08736	ACADSB	36	ENSG00000196177	10	123008979	123058290	acyl-CoA dehydrogenase short/branched chain	0.341579	0.0925659	0.00022415	0.000952684	0.324639	0.0917101
0.672153	0.920303	-1.26168	-0.330774	ACADVL	37	ENSG00000072778	17	7217125	7225266	acyl-CoA dehydrogenase very long chain	-0.224205	0.0656146	0.000633174	0.00244495	-0.216803	0.0649339
-1.31097	0.324591	-0.0939669	1.08035	ACAP1	9744	ENSG00000072818	17	7336529	7351477	ArfGAP with coiled-coil, ankyrin repeat and PH domains 1	0.317437	1.08469	0.769787		0.02752	0.319528
1.36011	-0.0639787	-0.256895	-1.03924	ACAP2	23527	ENSG00000114331	3	195274745	195443044	ArfGAP with coiled-coil, ankyrin repeat and PH domains 2	-0.145862	0.0789222	0.064578	0.137799	-0.138608	0.0772348
0.614662	-1.48285	0.281672	0.586518	ACAP2-IT1		ENSG00000229325	3	195280723	195282741		0.181542	1.43261	0.899161		0.00953184	0.324099
0.054336	1.39451	-0.761822	-0.687028	ACAP3	116983	ENSG00000131584	1	1292390	1309609	ArfGAP with coiled-coil, ankyrin repeat and PH domains 3	-0.225559	0.107641	0.036128	0.085216	-0.207216	0.104656
-1.03967	-0.66272	0.975365	0.727021	ACAT1	38	ENSG00000075239	11	108116695	108147603	acetyl-CoA acetyltransferase 1	0.694651	0.0775822	3.43664e-19	8.26119e-18	0.682732	0.0778747
-1.05606	-0.639793	0.711076	0.984774	ACAT2	39	ENSG00000120437	6	159762045	159779112	acetyl-CoA acetyltransferase 2	0.31629	0.0589328	8.00774e-08	6.05223e-07	0.309493	0.0586874
0.75551	0.302679	0.413696	-1.47189	ACBD3	64746	ENSG00000182827	1	226144679	226186741	acyl-CoA binding domain containing 3	-0.0133878	0.074339	0.857081	0.921059	-0.0126316	0.0725541
0.963257	-1.3995	0.313971	0.122274	ACBD3-AS1	107985353	ENSG00000234478	1	226148003	226155071	ACBD3 antisense RNA 1	-0.193491	2.58877	0.94042		-0.00314846	0.329817
1.40862	-0.623325	-0.79196	0.00666165	ACBD4	79777	ENSG00000181513	17	45132600	45144181	acyl-CoA binding domain containing 4	-0.0725059	0.271029	0.789068	0.874879	-0.0434554	0.211035
1.28542	0.176509	-1.08305	-0.378875	ACBD5	91452	ENSG00000107897	10	27168135	27243046	acyl-CoA binding domain containing 5	-0.108924	0.0666066	0.101978	0.199763	-0.104836	0.0654646
-0.993444	-0.0545116	-0.330713	1.37867	ACBD6		ENSG00000230124	1	180269653	180502954		0.12089	0.102307	0.237351	0.385127	0.111047	0.0984452
-1.3454	-0.17684	0.765388	0.756848	ACBD7	414149	ENSG00000176244	10	15075475	15088776	acyl-CoA binding domain containing 7	0.311402	0.172364	0.0708162	0.148827	0.258153	0.163706
0.244438	1.19815	-1.20303	-0.23956	ACCS	84680	ENSG00000110455	11	44065925	44084237	1-aminocyclopropane-1-carboxylate synthase homolog (inactive)	-0.124636	0.251938	0.620805	0.755157	-0.0797377	0.203912
-0.647266	0.829665	-1.05972	0.877322	ACD	65057	ENSG00000102977	16	67657512	67660810	ACD shelterin complex subunit and telomerase recruitment factor	-0.0138485	0.153933	0.928315	0.96319	-0.0112974	0.139749
1.10311	0.498678	-1.15559	-0.446201	ACE	1636	ENSG00000159640	17	63477061	63498380	angiotensin I converting enzyme	-0.344437	0.130537	0.00832471	0.0240627	-0.310675	0.127764
0.842934	0.884428	-0.951315	-0.776047	ACE2	59272	ENSG00000130234	X	15494566	15607236	angiotensin converting enzyme 2	-2.92387	0.395056	1.35014e-13	2.03396e-12	-2.81641	0.399001
1.00444	0.655824	-0.52784	-1.13242	ACER2	340485	ENSG00000177076	9	19409009	19452505	alkaline ceramidase 2	-0.480048	0.173865	0.00576166	0.0175052	-0.415967	0.172224
1.26904	-0.345412	0.187675	-1.11131	ACER3	55331	ENSG00000078124	11	76860859	77026797	alkaline ceramidase 3	-0.070317	0.076192	0.356063	0.518549	-0.0667916	0.0743618
1.46066	-0.582774	-0.704929	-0.172959	ACHE	43	ENSG00000087085	7	100889994	100896974	acetylcholinesterase (Cartwright blood group)	-0.845823	0.905022	0.35	0.512113	-0.105672	0.333345
-0.583844	0.106009	1.36447	-0.886632	ACIN1	22985	ENSG00000100813	14	23058564	23095614	apoptotic chromatin condensation inducer 1	0.0100039	0.0586999	0.864677	0.925455	0.00960533	0.0578122
1.36277	0.0281405	-0.39986	-0.99105	ACKR2	1238	ENSG00000144648	3	42804752	42887974	atypical chemokine receptor 2	-1.45233	1.08421	0.180401		-0.134462	0.355178
0.388491	1.23548	-0.856748	-0.767227	ACKR4	51554	ENSG00000129048	3	132597270	132618967	atypical chemokine receptor 4	-1.85055	0.769115	0.0161247	0.0429255	-0.690634	1.24056
-0.721726	-0.9815	0.670949	1.03228	ACLY	47	ENSG00000131473	17	41866917	41930542	ATP citrate lyase	0.114333	0.0527935	0.0303365	0.0735605	0.111734	0.0522366
0.964157	0.1571	0.281129	-1.40239	ACMSD	130013	ENSG00000153086	2	134838616	134902034	aminocarboxymuconate semialdehyde decarboxylase	-1.21032	1.15831	0.296068		-0.0944355	0.338294
-0.605069	-1.09183	0.816403	0.880499	ACO1	48	ENSG00000122729	9	32384603	32454769	aconitase 1	0.255638	0.0785334	0.00113333	0.00413827	0.244975	0.0775404
-0.12506	0.49506	-1.3406	0.970601	ACO2	50	ENSG00000100412	22	41447830	41529273	aconitase 2	-0.0174073	0.0706437	0.805365	0.886209	-0.016597	0.0691023
1.32264	-1.02716	0.127855	-0.423331	ACOT1	641371	ENSG00000184227	14	73537143	73543796	acyl-CoA thioesterase 1	-0.124254	0.369242	0.736485	0.839473	-0.0559879	0.249709
0.873804	0.829598	-1.07243	-0.630968	ACOT11	26027	ENSG00000162390	1	54542257	54639192	acyl-CoA thioesterase 11	-0.419245	0.125398	0.00082783	0.00311702	-0.385909	0.124319
-1.25512	-0.0467793	1.18715	0.114755	ACOT13	55856	ENSG00000112304	6	24667035	24705065	acyl-CoA thioesterase 13	0.155188	0.126962	0.221588	0.365914	0.136936	0.120416
0.261961	-1.17529	1.20932	-0.296	ACOT2	10965	ENSG00000119673	14	73567620	73575658	acyl-CoA thioesterase 2	0.108489	0.310391	0.726697	0.832457	0.0587452	0.229306
-0.260127	-0.249305	1.42528	-0.915844	ACOT4	122970	ENSG00000177465	14	73591873	73595766	acyl-CoA thioesterase 4	0.211745	0.625195	0.734846	0.838279	0.0473383	0.297234
-0.512431	-0.740586	-0.211322	1.46434	ACOT7	11332	ENSG00000097021	1	6264269	6393767	acyl-CoA thioesterase 7	0.133163	0.0903342	0.14045	0.258024	0.124683	0.0877155
0.685677	0.996866	-0.595682	-1.08686	ACOT8	10005	ENSG00000101473	20	45841721	45857405	acyl-CoA thioesterase 8	-0.306073	0.138085	0.0266533	0.065956	-0.270781	0.133843
0.763182	0.953511	-0.726339	-0.990354	ACOT9	23597	ENSG00000123130	X	23701055	23766475	acyl-CoA thioesterase 9	-0.286681	0.0869087	0.000971514	0.00359631	-0.272652	0.085839
0.49738	-1.4946	0.394818	0.602406	ACOX1	51	ENSG00000161533	17	75941507	75979177	acyl-CoA oxidase 1	0.0535446	0.0806404	0.506695	0.661426	0.0506734	0.078412
0.407659	0.695572	0.381507	-1.48474	ACOX2	8309	ENSG00000168306	3	58505136	58537283	acyl-CoA oxidase 2	-0.227524	0.521926	0.662887	0.786787	-0.0661658	0.286472
0.567419	0.956228	-0.212771	-1.31087	ACOX3	8310	ENSG00000087008	4	8366282	8440723	acyl-CoA oxidase 3, pristanoyl	-0.237308	0.177803	0.181983	0.315007	-0.190335	0.163996
1.0756	0.53188	-0.437539	-1.16994	ACOXL	55289	ENSG00000153093	2	110732539	111120610	acyl-CoA oxidase like	-0.995513	0.798223	0.212338	0.354688	-0.16154	0.354972
-0.308137	1.2697	-1.12522	0.163661	ACOXL-AS1	400997	ENSG00000204581	2	111098345	111116407	ACOXL antisense RNA 1	-1.81463	2.02662	0.370575		-0.0476038	0.333414
-0.89261	-0.821628	0.685553	1.02869	ACP1	52	ENSG00000143727	2	264140	278283	acid phosphatase 1	0.40437	0.0603998	2.15844e-11	2.59229e-10	0.396836	0.0602994
-0.90653	-0.824476	0.854238	0.876767	ACP2	53	ENSG00000134575	11	47239302	47248906	acid phosphatase 2, lysosomal	0.141981	0.135593	0.29505	0.453521	0.123012	0.127239
0.812164	0.899666	-0.674518	-1.03731	ACP3	55	ENSG00000014257	3	132317369	132368298	acid phosphatase 3	-0.520207	0.205333	0.0112938	0.031567	-0.43055	0.203478
1.25006	0.10138	-0.168824	-1.18261	ACP5	54	ENSG00000102575	19	11574653	11579993	acid phosphatase 5, tartrate resistant	-0.280531	0.534654	0.599794	0.739565	-0.0795491	0.29107
-0.723549	-0.743169	0.0819967	1.38472	ACP6	51205	ENSG00000162836	1	147629652	147670524	acid phosphatase 6, lysophosphatidic	0.367544	0.157847	0.0198869	0.0513813	0.31859	0.153428
1.28957	0.290921	-0.831408	-0.749086	ACP7	390928	ENSG00000183760	19	39083913	39111493	acid phosphatase 7, tartrate resistant (putative)	-1.16947	1.13334	0.302129		-0.0965012	0.338159
-1.28581	-0.295212	0.72081	0.860215	ACRBP	84519	ENSG00000111644	12	6638075	6647433	acrosin binding protein	0.694616	0.630741	0.270779	0.425238	0.164998	0.337602
-0.448586	1.19243	-1.11362	0.369782	ACSBG1	23205	ENSG00000103740	15	78167468	78245688	acyl-CoA synthetase bubblegum family member 1	-1.27248	1.70166	0.454588		-0.0463721	0.331348
1.46697	-0.277102	-0.416974	-0.77289	ACSBG2	81616	ENSG00000130377	19	6135247	6193094	acyl-CoA synthetase bubblegum family member 2	-1.06426	2.12072	0.615782		-0.0257447	0.330025
0.890988	0.829504	-0.998114	-0.722379	ACSF2	80221	ENSG00000167107	17	50426158	50474845	acyl-CoA synthetase family member 2	-1.4318	0.110352	1.69728e-38	1.265e-36	-1.41617	0.110733
0.74125	0.765536	-0.14953	-1.35726	ACSF3	197322	ENSG00000176715	16	89088375	89164121	acyl-CoA synthetase family member 3	-0.200866	0.146231	0.169558	0.298004	-0.171329	0.137553
0.912778	0.791628	-1.06156	-0.642844	ACSL1	2180	ENSG00000151726	4	184755595	184826818	acyl-CoA synthetase long chain family member 1	-0.405592	0.0680656	2.54026e-09	2.3737e-08	-0.395809	0.0679067
-0.578768	-1.09566	0.660135	1.01429	ACSL3	2181	ENSG00000123983	2	222860942	222944639	acyl-CoA synthetase long chain family member 3	0.117826	0.0528183	0.0256957	0.0638681	0.115159	0.0522647
-0.643155	-1.06323	0.852449	0.85394	ACSL4	2182	ENSG00000068366	X	109624244	109733403	acyl-CoA synthetase long chain family member 4	0.458185	0.0672366	9.45818e-12	1.17958e-10	0.448646	0.0671775
0.907001	0.822395	-0.91766	-0.811736	ACSL5	51703	ENSG00000197142	10	112374116	112428379	acyl-CoA synthetase long chain family member 5	-1.03266	0.0556509	7.2917e-77	1.83198e-74	-1.02755	0.0557305
-1.07486	-0.395902	1.286	0.184766	ACSL6	23305	ENSG00000164398	5	131949973	132012243	acyl-CoA synthetase long chain family member 6	1.36071	1.04867	0.194439		0.131854	0.352728
-0.122703	1.36619	-1.03728	-0.206213	ACSM1	116285	ENSG00000166743	16	20623235	20698890	acyl-CoA synthetase medium chain family member 1	-1.36343	1.47154	0.35417		-0.0671089	0.334164
0.481113	1.14329	-1.07873	-0.54568	ACSM3	6296	ENSG00000005187	16	20610243	20797581	acyl-CoA synthetase medium chain family member 3	-0.409585	0.134683	0.00235704	0.0079609	-0.371724	0.133168
-0.935218	-0.776489	0.686352	1.02535	ACSS1	84532	ENSG00000154930	20	25006230	25058980	acyl-CoA synthetase short chain family member 1	0.440509	0.0720232	9.58279e-10	9.46551e-09	0.429482	0.0719417
1.08623	0.590833	-1.01848	-0.658582	ACSS2	55902	ENSG00000131069	20	34872146	34927962	acyl-CoA synthetase short chain family member 2	-0.502	0.0688712	3.12317e-13	4.53238e-12	-0.491901	0.0688774
0.963257	-1.3995	0.313971	0.122274	ACTA1	58	ENSG00000143632	1	229430365	229434104	actin alpha 1, skeletal muscle	-0.193491	2.58877	0.94042		-0.00314846	0.329817
0.662101	1.04463	-0.936718	-0.770016	ACTA2	59	ENSG00000107796	10	88935074	88991339	actin alpha 2, smooth muscle	-1.23359	0.210703	4.78107e-09	4.26057e-08	-1.16785	0.214984
0.0587698	-0.447253	1.36066	-0.972174	ACTA2-AS1	100132116	ENSG00000180139	10	88932390	88940820	ACTA2 antisense RNA 1	0.347396	1.05956	0.743011		0.031496	0.31933
0.254077	0.847584	-1.44811	0.346448	ACTB	60	ENSG00000075624	7	5526409	5563902	actin beta	-0.0737543	0.0529896	0.163963	0.29063	-0.0718393	0.0523856
0.936411	0.367329	-1.4063	0.102563	ACTBP7		ENSG00000185607	15	43989061	43990184		-1.8085	2.66438	0.497283		-0.028407	0.331941
0.355898	0.909111	0.157029	-1.42204	ACTBP9		ENSG00000266920	18	62442028	62443126		-1.88038	2.52281	0.45606		-0.0312636	0.33201
0.711773	0.929057	-1.19729	-0.443539	ACTG1	71	ENSG00000184009	17	81509413	81523847	actin gamma 1	-0.286881	0.0539565	1.05556e-07	7.8559e-07	-0.281379	0.0537116
-1.40891	0.156319	0.305318	0.947271	ACTG1P20		ENSG00000241547	1	27325329	27325796		1.23043	1.13685	0.279112		0.0990932	0.339784
-0.5705	-1.11325	0.935917	0.747835	ACTG1P25	148709	ENSG00000234996	1	202861754	202875241	actin gamma 1 pseudogene 25	0.269348	0.453068	0.552178	0.700944	0.0973455	0.279181
0.963257	-1.3995	0.313971	0.122274	ACTG1P3		ENSG00000215388	20	1160584	1161697		-0.193491	2.58877	0.94042		-0.00314846	0.329817
0.10639	-1.33668	1.08693	0.143364	ACTL10	170487	ENSG00000288649	20	33666943	33668525	actin like 10	0.32521	0.490116	0.506987	0.66164	0.106711	0.28955
1.1243	0.297257	-0.146349	-1.27521	ACTL11P	389120	ENSG00000234667	3	49873347	49877305	actin like 11, pseudogene	-0.413313	1.38412	0.765238		-0.0224323	0.324415
-0.862879	-0.868974	0.8477	0.884154	ACTL6A	86	ENSG00000136518	3	179562886	179588407	actin like 6A	0.521387	0.067658	1.29613e-14	2.17096e-13	0.511743	0.0677094
-1.09799	-0.20369	1.3238	-0.0221141	ACTL8	81569	ENSG00000117148	1	17755333	17827063	actin like 8	3.44307	1.97308	0.0809812		0.100341	0.350489
-0.642393	-1.06383	0.851458	0.854763	ACTN1	87	ENSG00000072110	14	68874128	68979440	actinin alpha 1	0.333404	0.0607406	4.04258e-08	3.19651e-07	0.326145	0.0604879
0.892756	0.838342	-0.835384	-0.895714	ACTN4	81	ENSG00000130402	19	38647649	38731589	actinin alpha 4	-0.438632	0.0458853	1.18547e-21	3.36357e-20	-0.434312	0.0458675
0.76358	0.953392	-0.988852	-0.728121	ACTR10	55860	ENSG00000131966	14	58200080	58235636	actin related protein 10	-0.236391	0.100276	0.0184038	0.0481566	-0.219863	0.097958
-1.33132	0.0919816	0.144714	1.09462	ACTR1A	10121	ENSG00000138107	10	102461881	102502712	actin related protein 1A	0.0570247	0.073261	0.436346	0.596434	0.0544328	0.0716206
-1.37198	-0.113074	0.709376	0.775677	ACTR1B	10120	ENSG00000115073	2	97655939	97664044	actin related protein 1B	0.230922	0.0862374	0.00741198	0.0218048	0.218928	0.0847951
-1.28751	-0.246262	0.996494	0.537279	ACTR2	10097	ENSG00000138071	2	65227788	65271253	actin related protein 2	0.0279244	0.0477208	0.558439	0.706071	0.0283137	0.0472485
-1.17801	-0.212072	1.24329	0.146796	ACTR3	10096	ENSG00000115091	2	113890063	113962596	actin related protein 3	0.0798593	0.0539818	0.13904	0.25619	0.0778498	0.0533454
-1.21619	-0.327512	1.10511	0.438586	ACTR3-AS1		ENSG00000228857	2	113831049	113891020		0.939258	0.742044	0.205595	0.346522	0.173625	0.357369
-0.997866	-0.718477	0.771178	0.945165	ACTR3B	57180	ENSG00000133627	7	152759749	152855378	actin related protein 3B	0.642951	0.155459	3.53685e-05	0.000175625	0.593098	0.157026
-0.251195	0.222268	1.21594	-1.18701	ACTR3C	653857	ENSG00000106526	7	150243916	150323725	actin related protein 3C	0.0123252	0.291761	0.966304	0.982051	0.00728941	0.219531
-0.820607	-0.860036	0.544802	1.13584	ACTR5	79913	ENSG00000101442	20	38748460	38772520	actin related protein 5	0.47368	0.120891	8.91966e-05	0.000410705	0.44284	0.120591
-1.4782	0.660868	0.260089	0.557246	ACTR6	64431	ENSG00000075089	12	100199122	100241865	actin related protein 6	0.0418984	0.0846731	0.620723	0.755157	0.0394689	0.0821347
-1.09893	-0.451696	0.335945	1.21468	ACTR8	93973	ENSG00000113812	3	53867066	53882152	actin related protein 8	0.129284	0.10891	0.235198	0.382374	0.117535	0.10437
-0.813486	-0.688996	1.35738	0.145106	ACTRT3	84517	ENSG00000184378	3	169766921	169769561	actin related protein T3	1.22232	0.466071	0.0087259	0.0251105	0.825444	0.537496
0.893334	0.837315	-0.824806	-0.905844	ACVR1	90	ENSG00000115170	2	157736251	157876330	activin A receptor type 1	-0.301198	0.0962741	0.00175671	0.00611903	-0.283294	0.0949115
-1.07395	-0.558614	0.498503	1.13406	ACVR1B	91	ENSG00000135503	12	51951699	51997078	activin A receptor type 1B	0.0898667	0.113397	0.428073	0.589263	0.0809734	0.107811
1.01163	0.646074	-0.524551	-1.13315	ACVR1C	130399	ENSG00000123612	2	157526767	157628864	activin A receptor type 1C	-0.248525	0.106298	0.0193874	0.0502325	-0.229468	0.103691
0.919889	0.804724	-0.95998	-0.764632	ACVR2A	92	ENSG00000121989	2	147844517	147930826	activin A receptor type 2A	-0.475743	0.111307	1.91852e-05	9.9417e-05	-0.449256	0.111118
-0.20874	0.275342	1.16637	-1.23297	ACVR2B	93	ENSG00000114739	3	38453890	38493142	activin A receptor type 2B	-0.00576525	0.141689	0.967544	0.9827	-0.00472204	0.130422
-1.34451	0.898271	0.601168	-0.154931	ACVR2B-AS1	100128640	ENSG00000229589	3	38451027	38454820	ACVR2B antisense RNA 1	0.201984	1.20471	0.866849		0.0143933	0.321136
1.07673	0.24665	-1.33406	0.0106833	ACVRL1	94	ENSG00000139567	12	51906908	51923361	activin A receptor like type 1	-2.09255	2.53419	0.408959		-0.0363743	0.332845
0.425448	0.713476	-1.48088	0.341957	ACY1	95	ENSG00000243989	3	51983340	51989197	aminoacylase 1	-0.134504	0.321945	0.676104	0.796948	-0.0698571	0.23491
0.424732	1.20869	-0.70576	-0.927666	ACY3	91703	ENSG00000132744	11	67642555	67650730	aminoacylase 3	-0.495906	0.250846	0.0480496	0.108129	-0.365563	0.240688
0.234566	-1.44734	0.845959	0.36681	ACYP1	97	ENSG00000119640	14	75053237	75069483	acylphosphatase 1	0.112026	0.158122	0.478649	0.63579	0.0922197	0.14417
0.943692	-1.31368	0.582014	-0.212028	ACYP2	98	ENSG00000170634	2	53970838	54305300	acylphosphatase 2	0.0328507	0.185911	0.859744	0.922487	0.0250004	0.162307
-0.795846	-0.924792	0.735634	0.985004	ADA	100	ENSG00000196839	20	44584896	44652252	adenosine deaminase	0.378819	0.240646	0.115447	0.220636	0.27091	0.219871
0.666164	0.917361	-0.311713	-1.27181	ADA2	51816	ENSG00000093072	22	17178790	17258235	adenosine deaminase 2	-1.57889	1.56122	0.311864		-0.0696884	0.335846
-1.4081	-0.0124651	0.646601	0.773961	ADAL	161823	ENSG00000168803	15	43330672	43354569	adenosine deaminase like	0.249597	0.185702	0.178925	0.311131	0.197678	0.170727
0.845934	0.883891	-0.805809	-0.924015	ADAM10	102	ENSG00000137845	15	58588809	58749791	ADAM metallopeptidase domain 10	-0.258456	0.0537287	1.50632e-06	9.45745e-06	-0.25318	0.0534302
-0.232107	-1.14197	0.0962903	1.27779	ADAM11	4185	ENSG00000073670	17	44758988	44781846	ADAM metallopeptidase domain 11	0.975678	0.851038	0.251606	0.402844	0.140388	0.346823
-1.09785	-0.485002	0.399778	1.18308	ADAM15	8751	ENSG00000143537	1	155050566	155062775	ADAM metallopeptidase domain 15	0.206745	0.0755594	0.00621538	0.018705	0.198196	0.0744385
1.33977	0.15921	-0.917103	-0.58188	ADAM17	6868	ENSG00000151694	2	9488486	9556732	ADAM metallopeptidase domain 17	-0.140659	0.0820122	0.0863266	0.175047	-0.133083	0.0800805
0.718716	0.913319	-0.417567	-1.21447	ADAM19	8728	ENSG00000135074	5	157395534	157575775	ADAM metallopeptidase domain 19	-0.276224	0.177269	0.119182	0.226568	-0.224043	0.165641
-0.854265	-0.864693	1.00969	0.709264	ADAM22	53616	ENSG00000008277	7	87934143	88202889	ADAM metallopeptidase domain 22	0.151165	0.130854	0.247999	0.398215	0.13235	0.123517
0.412842	1.18933	-0.54457	-1.0576	ADAM28	10863	ENSG00000042980	8	24294069	24359014	ADAM metallopeptidase domain 28	-1.17872	0.628143	0.0605833	0.130762	-0.363111	0.503578
0.860822	0.183725	-1.4387	0.394157	ADAM32	203102	ENSG00000197140	8	39106990	39284917	ADAM metallopeptidase domain 32	-0.556407	0.679185	0.412656	0.575101	-0.112859	0.319529
0.943258	0.785181	-0.866023	-0.862416	ADAM8	101	ENSG00000151651	10	133262420	133276868	ADAM metallopeptidase domain 8	-2.1135	0.145305	6.25649e-48	6.91187e-46	-2.09416	0.145775
0.887066	0.842936	-0.809694	-0.920308	ADAM9	8754	ENSG00000168615	8	38996754	39105445	ADAM metallopeptidase domain 9	-0.467741	0.048577	6.0405e-22	1.76204e-20	-0.462777	0.0485695
-0.472889	0.843019	0.814234	-1.18436	ADAMTS13	11093	ENSG00000160323	9	133414358	133459402	ADAM metallopeptidase with thrombospondin type 1 motif 13	-0.158557	0.582273	0.785386	0.872936	-0.0385109	0.291332
0.0410699	1.39446	-0.825946	-0.609588	ADAMTS14	140766	ENSG00000138316	10	70672506	70762441	ADAM metallopeptidase with thrombospondin type 1 motif 14	-0.282173	0.171584	0.100069	0.196865	-0.232072	0.161513
-1.30214	-0.0374402	1.12024	0.219339	ADAMTS15	170689	ENSG00000166106	11	130448645	130476645	ADAM metallopeptidase with thrombospondin type 1 motif 15	2.63844	2.20754	0.23201		0.0565815	0.336176
0.99487	-1.35897	0.402445	-0.0383449	ADAMTS17	170691	ENSG00000140470	15	99971437	100342005	ADAM metallopeptidase with thrombospondin type 1 motif 17	0.0708211	0.553037	0.898103	0.945445	0.019391	0.28525
-0.763018	-0.96304	0.844053	0.882005	ADAMTS19	171019	ENSG00000145808	5	129460281	129738683	ADAM metallopeptidase with thrombospondin type 1 motif 19	0.781152	0.351974	0.0264633	0.0655149	0.520663	0.360983
0.0348056	-1.41805	0.816596	0.566649	ADAMTS19-AS1	103689846	ENSG00000249421	5	129424782	129461076	ADAMTS19 antisense RNA 1	1.90313	2.0535	0.354045		0.0503131	0.334
-0.514558	-1.04479	1.24221	0.317137	ADAMTS6	11174	ENSG00000049192	5	65148738	65481920	ADAM metallopeptidase with thrombospondin type 1 motif 6	0.767	0.245857	0.00181034	0.00628757	0.64538	0.253032
-0.0577001	1.42671	-0.574739	-0.794266	ADAMTS7	11173	ENSG00000136378	15	78759206	78811464	ADAM metallopeptidase with thrombospondin type 1 motif 7	-0.494065	0.422657	0.242424	0.391645	-0.209428	0.306867
0.984271	0.735721	-0.933269	-0.786723	ADAMTS9	56999	ENSG00000163638	3	64515654	64688000	ADAM metallopeptidase with thrombospondin type 1 motif 9	-0.801843	0.265466	0.00252352	0.00844625	-0.660055	0.274825
-0.124084	-1.36761	0.774734	0.71696	ADAMTSL2	9719	ENSG00000197859	9	133532164	133575519	ADAMTS like 2	0.545907	1.3418	0.68412		0.032083	0.324938
0.0873469	-0.965898	1.35401	-0.475461	ADAMTSL4	54507	ENSG00000143382	1	150549369	150560937	ADAMTS like 4	0.103022	0.75216	0.891056	0.941723	0.0172475	0.304668
0.813361	0.0440624	0.563486	-1.42091	ADAMTSL4-AS2		ENSG00000237781	1	150548562	150557724		-0.955841	2.18953	0.662438		-0.0213548	0.329877
0.970817	0.744322	-0.729805	-0.985334	ADAMTSL5	339366	ENSG00000185761	19	1505022	1513604	ADAMTS like 5	-0.684972	0.202745	0.000728869	0.00277798	-0.59983	0.206135
0.143582	1.18392	-0.0735821	-1.25392	ADAP1	11033	ENSG00000105963	7	897900	955407	ArfGAP with dual PH domains 1	-0.19602	0.123309	0.11191	0.215474	-0.174627	0.118118
0.293381	0.306831	-1.44894	0.848731	ADAP2	55803	ENSG00000184060	17	30906344	30959322	ArfGAP with dual PH domains 2	-0.0652957	0.257526	0.799843	0.882007	-0.0406882	0.204382
-0.792657	-0.933084	0.940191	0.785551	ADAR	103	ENSG00000160710	1	154581695	154628013	adenosine deaminase RNA specific	0.250626	0.0548063	4.80916e-06	2.79107e-05	0.245429	0.054473
-1.05866	-0.616758	1.05604	0.619375	ADARB1	104	ENSG00000197381	21	45073853	45226560	adenosine deaminase RNA specific B1	0.325048	0.128456	0.0113929	0.0317928	0.293653	0.125596
-1.159	-0.325279	1.21615	0.268135	ADAT1	23536	ENSG00000065457	16	75596868	75623300	adenosine deaminase tRNA specific 1	0.219519	0.121115	0.0699117	0.147264	0.196018	0.116645
-0.874577	-0.851816	0.76495	0.961444	ADAT2	134637	ENSG00000189007	6	143422832	143450695	adenosine deaminase tRNA specific 2	0.308117	0.134756	0.022226	0.0564879	0.27453	0.130863
-1.46074	0.201325	0.501932	0.757481	ADAT3	113179	ENSG00000213638	19	1905399	1913447	adenosine deaminase tRNA specific 3	0.495267	0.598466	0.407919	0.570524	0.122575	0.313815
-1.03782	-0.618105	0.536553	1.11937	ADCK1	57143	ENSG00000063761	14	77800109	77935014	aarF domain containing kinase 1	0.489385	0.219363	0.0256853	0.0638627	0.389227	0.214303
-0.709677	-0.259417	-0.505274	1.47437	ADCK2	90956	ENSG00000133597	7	140672945	140696261	aarF domain containing kinase 2	0.0935655	0.125951	0.45756	0.615972	0.0823034	0.118422
1.0932	0.579681	-0.649858	-1.02302	ADCK5	203054	ENSG00000173137	8	144373101	144393242	aarF domain containing kinase 5	-0.222074	0.226766	0.327428	0.489382	-0.156312	0.196184
-0.769688	-0.891047	0.48788	1.17285	ADCY1	107	ENSG00000164742	7	45574140	45723116	adenylate cyclase 1	0.546506	0.206962	0.00827562	0.0239519	0.455814	0.206161
-0.756245	-0.967477	0.804982	0.918741	ADCY10	55811	ENSG00000143199	1	167809386	167914215	adenylate cyclase 10	1.37276	1.71493	0.423434		0.0504978	0.332117
-0.718092	-0.627089	-0.0975877	1.44277	ADCY10P1	221442	ENSG00000161912	6	41101022	41140835	ADCY10 pseudogene 1	0.33156	0.444228	0.455442	0.614076	0.125085	0.284014
-0.85335	-0.863889	0.698882	1.01836	ADCY3	109	ENSG00000138031	2	24819169	24920237	adenylate cyclase 3	0.596115	0.0701032	1.84128e-17	3.90226e-16	0.586127	0.0702258
0.757804	0.949694	-1.03547	-0.672032	ADCY4	196883	ENSG00000129467	14	24318349	24335093	adenylate cyclase 4	-2.59691	0.482798	7.49473e-08	5.69212e-07	-2.41219	0.495371
1.02457	0.658146	-0.616254	-1.06646	ADCY6	112	ENSG00000174233	12	48766194	48789089	adenylate cyclase 6	-0.283311	0.0651751	1.38063e-05	7.37522e-05	-0.275402	0.0647189
-0.967382	0.478072	-0.681602	1.17091	ADCY6-DT	100506125	ENSG00000257660	12	48789147	48790535	ADCY6 divergent transcript	0.307572	0.97521	0.752466	0.849827	0.0323703	0.316869
0.73255	0.241351	0.495617	-1.46952	ADCY7	113	ENSG00000121281	16	50246137	50318135	adenylate cyclase 7	-0.131963	0.233281	0.571608	0.71725	-0.0891902	0.194293
0.538027	0.863881	-0.000396921	-1.40151	ADCY9	115	ENSG00000162104	16	3953387	4116442	adenylate cyclase 9	-0.171457	0.155283	0.269527	0.423826	-0.142692	0.143863
0.817406	0.628226	-1.39074	-0.0548889	ADD1	118	ENSG00000087274	4	2843844	2930076	adducin 1	-0.104078	0.0637927	0.102785	0.20099	-0.100488	0.0627825
0.74905	0.841764	-0.313217	-1.2776	ADD3	120	ENSG00000148700	10	109996368	110135565	adducin 3	-0.145044	0.061802	0.0189296	0.0492347	-0.140708	0.0610059
1.1621	-0.533613	-1.07821	0.449726	ADD3-AS1	100505933	ENSG00000203876	10	109940104	110008381	ADD3 antisense RNA 1	-0.14248	1.00768	0.887559		-0.0137812	0.316096
-1.13308	1.21819	-0.380578	0.295474	ADGRA2	25960	ENSG00000020181	8	37784191	37844896	adhesion G protein-coupled receptor A2	-0.0349066	0.788963	0.96471	0.981278	-0.0048756	0.306673
-0.89288	-0.830422	0.98056	0.742742	ADGRA3	166647	ENSG00000152990	4	22345071	22516066	adhesion G protein-coupled receptor A3	0.3914	0.0743992	1.43426e-07	1.04791e-06	0.379913	0.0741715
0.730562	0.197747	-1.46323	0.534919	ADGRB1	575	ENSG00000181790	8	142449430	142545009	adhesion G protein-coupled receptor B1	-0.887746	1.73335	0.608542		-0.0319576	0.328816
-0.179291	1.46014	-0.5522	-0.728647	ADGRB2	576	ENSG00000121753	1	31727117	31764893	adhesion G protein-coupled receptor B2	-0.139932	0.32653	0.668257	0.791111	-0.0719656	0.237052
-1.4417	0.154989	0.45671	0.83	ADGRE2	30817	ENSG00000127507	19	14732392	14778560	adhesion G protein-coupled receptor E2	0.52698	0.303003	0.0820011	0.16786	0.340963	0.281034
0.754643	0.529734	-1.45616	0.171779	ADGRE5	976	ENSG00000123146	19	14380501	14408725	adhesion G protein-coupled receptor E5	-0.0616378	0.0761003	0.417966	0.580117	-0.0585094	0.0742549
0.879678	0.851484	-0.902187	-0.828975	ADGRF1	266977	ENSG00000153292	6	46997708	47042350	adhesion G protein-coupled receptor F1	-1.38068	0.0696025	1.43737e-87	5.74099e-85	-1.37431	0.0697126
-0.806567	1.44194	-0.132744	-0.502629	ADGRF2	222611	ENSG00000164393	6	47656487	47695192	adhesion G protein-coupled receptor F2	-0.60217	2.27847	0.791559		-0.0123334	0.329483
0.797893	0.546951	0.0891245	-1.43397	ADGRF3	165082	ENSG00000173567	2	26308173	26346817	adhesion G protein-coupled receptor F3	-1.35466	1.28749	0.292719		-0.0864737	0.337911
0.86457	0.866946	-0.896146	-0.83537	ADGRF4	221393	ENSG00000153294	6	47685864	47722021	adhesion G protein-coupled receptor F4	-3.83344	0.332	7.68856e-31	3.86338e-29	-3.77627	0.332036
0.828445	0.669221	-1.35888	-0.138785	ADGRF5P1	389740	ENSG00000227582	9	62860873	62864957	adhesion G protein-coupled receptor F5 pseudogene 1	-2.44493	2.34583	0.297299		-0.050065	0.334982
0.507545	0.875309	-1.4056	0.0227467	ADGRG1	9289	ENSG00000205336	16	57610652	57665580	adhesion G protein-coupled receptor G1	-0.0542906	0.0583191	0.351893	0.514013	-0.05251	0.057469
-1.20009	0.0745335	1.2413	-0.115742	ADGRG2	10149	ENSG00000173698	X	18989307	19122637	adhesion G protein-coupled receptor G2	2.39559	2.32769	0.303398		0.0451615	0.334016
-0.930495	-0.794947	0.780068	0.945374	ADGRG5	221188	ENSG00000159618	16	57542643	57591681	adhesion G protein-coupled receptor G5	0.631025	0.180568	0.000474654	0.00187785	0.56311	0.182544
1.02728	0.678105	-0.728794	-0.97659	ADGRG6	57211	ENSG00000112414	6	142301854	142446266	adhesion G protein-coupled receptor G6	-0.604478	0.068115	7.03339e-19	1.65248e-17	-0.594831	0.0682276
1.1549	0.516846	-0.806689	-0.865059	ADGRG7	84873	ENSG00000144820	3	100609601	100695479	adhesion G protein-coupled receptor G7	-2.50796	0.459118	4.69307e-08	3.66069e-07	-2.33505	0.471754
-0.758629	-0.966314	0.823717	0.901226	ADGRL1	22859	ENSG00000072071	19	14147743	14206187	adhesion G protein-coupled receptor L1	0.466076	0.109401	2.04193e-05	0.000105566	0.440813	0.109156
1.42397	-0.0580823	-0.817324	-0.548563	ADGRL1-AS1	100507373	ENSG00000267169	19	14137146	14171267	ADGRL1 antisense RNA 1	-0.682041	0.683464	0.31832	0.479446	-0.140052	0.331564
-0.806567	1.44194	-0.132744	-0.502629	ADGRL3	23284	ENSG00000150471	4	61200326	62078335	adhesion G protein-coupled receptor L3	-0.60217	2.27847	0.791559		-0.0123334	0.329483
-0.0434475	1.30947	-1.12392	-0.142105	ADGRL4	64123	ENSG00000162618	1	78889764	79282124	adhesion G protein-coupled receptor L4	-1.1851	1.51364	0.433656		-0.0549759	0.331395
-0.490726	-1.02938	1.28169	0.238413	ADGRV1	84059	ENSG00000164199	5	90529344	91164437	adhesion G protein-coupled receptor V1	0.647936	0.166523	9.98488e-05	0.000455045	0.590785	0.168269
0.437254	1.1798	-0.574615	-1.04244	ADH1C	126	ENSG00000248144	4	99336497	99352746	alcohol dehydrogenase 1C (class I), gamma polypeptide	-1.52579	0.581011	0.00863701	0.0248869	-0.955885	0.726332
0.914433	-0.802624	-0.925777	0.813969	ADH4	127	ENSG00000198099	4	99123657	99157792	alcohol dehydrogenase 4 (class II), pi polypeptide	-0.101285	1.08164	0.925394		-0.00870676	0.317802
-0.315266	1.25418	-1.13536	0.196452	ADH5	128	ENSG00000197894	4	99070978	99088801	alcohol dehydrogenase 5 (class III), chi polypeptide	-0.0319707	0.0636882	0.615676	0.75201	-0.0307322	0.0625707
0.951593	0.775214	-0.899324	-0.827484	ADH5P4		ENSG00000233859	6	65836930	65838039		-1.36791	1.08409	0.20702		-0.125488	0.350151
0.620826	-0.29152	-1.27717	0.94786	ADH6	130	ENSG00000172955	4	99202638	99219537	alcohol dehydrogenase 6 (class V)	-0.0592769	0.346299	0.864088	0.925079	-0.0281529	0.240317
-1.11355	-0.540328	1.051	0.60287	ADHFE1	137872	ENSG00000147576	8	66432492	66468907	alcohol dehydrogenase iron containing 1	1.68337	1.91884	0.380331		0.0494529	0.333176
-0.80026	-0.927229	0.801603	0.925885	ADI1	55256	ENSG00000182551	2	3497366	3519531	acireductone dioxygenase 1	0.175172	0.0522437	0.000799451	0.00301746	0.171637	0.0518076
0.649463	0.430059	-1.49122	0.411701	ADIPOR1	51094	ENSG00000159346	1	202940826	202958572	adiponectin receptor 1	-0.0581581	0.0692478	0.40099	0.564452	-0.0557979	0.0678393
1.07211	0.622299	-0.965147	-0.72926	ADIPOR2	79602	ENSG00000006831	12	1688574	1788674	adiponectin receptor 2	-0.246255	0.062613	8.39007e-05	0.000388618	-0.239468	0.0620876
0.829431	0.901862	-0.864804	-0.866489	ADIRF	10974	ENSG00000148671	10	86968432	86983934	adipogenesis regulatory factor	-1.75281	0.120835	1.11332e-47	1.19601e-45	-1.73705	0.121289
0.958721	0.767868	-0.88171	-0.844879	ADIRF-AS1		ENSG00000272734	10	86965345	86971311		-1.339	0.430451	0.00186646	0.00646087	-1.04479	0.47503
-1.29059	-0.0124437	1.1441	0.158926	ADK	132	ENSG00000156110	10	74151202	74709963	adenosine kinase	0.144442	0.0883603	0.102113	0.199977	0.135718	0.0860734
0.481209	1.17293	-0.937925	-0.716216	ADM	133	ENSG00000148926	11	10305073	10307397	adrenomedullin	-1.09085	0.191103	1.14211e-08	9.73309e-08	-1.0318	0.19483
0.770686	0.388436	0.310208	-1.46933	ADM-DT		ENSG00000254554	11	10302657	10303704		-1.5099	1.96277	0.441733		-0.0418409	0.331901
0.776776	0.948126	-0.933269	-0.791633	ADM2	79924	ENSG00000128165	22	50481543	50486440	adrenomedullin 2	-2.74616	0.17457	9.27284e-56	1.34994e-53	-2.72427	0.174922
-1.06753	-0.597825	1.07379	0.591565	ADM5	199800	ENSG00000224420	19	49689594	49690575	adrenomedullin 5 (putative)	0.874287	0.51659	0.0905662	0.181832	0.336588	0.420789
-0.754289	-0.951925	1.03926	0.666955	ADNP	23394	ENSG00000101126	20	50888916	50931437	activity dependent neuroprotector homeobox	0.142953	0.055328	0.00977358	0.0278019	0.13982	0.0547544
-0.577468	-1.10981	0.768152	0.919127	ADNP-AS1	101927631	ENSG00000259456	20	50930984	50945148	ADNP antisense RNA 1	0.608762	0.67581	0.367701	0.531028	0.126031	0.324637
-0.562689	-1.01163	1.24582	0.328501	ADNP2	22850	ENSG00000101544	18	80109262	80147523	ADNP homeobox 2	0.214728	0.0831654	0.00982468	0.0279268	0.204069	0.0817052
-0.949955	-0.767226	0.990109	0.727072	ADO	84890	ENSG00000181915	10	62804720	62808479	2-aminoethanethiol dioxygenase	0.233836	0.0944125	0.0132587	0.0363483	0.219386	0.0924805
1.44072	-0.835971	-0.156369	-0.448375	ADORA1	134	ENSG00000163485	1	203090654	203167405	adenosine A1 receptor	-0.378455	0.913875	0.678785	0.798839	-0.0446108	0.316127
-1.01148	-0.706663	0.831603	0.886545	ADORA2B	136	ENSG00000170425	17	15945130	15975746	adenosine A2b receptor	0.799819	0.0944268	2.44847e-17	5.14707e-16	0.783159	0.0949658
-0.992352	-0.701767	1.05651	0.637604	ADPGK	83440	ENSG00000159322	15	72751294	72785846	ADP dependent glucokinase	0.449512	0.0813916	3.3357e-08	2.66326e-07	0.435533	0.0813267
0.123457	1.34524	-0.954079	-0.514614	ADPRH	141	ENSG00000144843	3	119579268	119589945	ADP-ribosylarginine hydrolase	-0.795755	0.573146	0.165016	0.291832	-0.234702	0.368218
0.827967	0.0795913	0.519952	-1.42751	ADPRHL1	113622	ENSG00000153531	13	113399611	113453488	ADP-ribosylhydrolase like 1	-0.0797104	0.408609	0.845332	0.913319	-0.0314692	0.258967
1.26034	0.343099	-0.866223	-0.737215	ADPRM	56985	ENSG00000170222	17	10697594	10711558	ADP-ribose/CDP-alcohol diphosphatase, manganese dependent	-0.371138	0.251296	0.139704	0.256976	-0.257799	0.225803
-0.665896	-0.758651	0.0171613	1.40739	ADPRS	54936	ENSG00000116863	1	36088892	36093932	ADP-ribosylserine hydrolase	0.211572	0.138357	0.126223	0.237174	0.184053	0.131258
0.769191	-0.53441	0.906131	-1.14091	ADRA1B	147	ENSG00000170214	5	159865080	159973012	adrenoceptor alpha 1B	-0.155758	2.016	0.938416		-0.00406684	0.328158
-0.182649	0.807495	0.716989	-1.34183	ADRA1D	146	ENSG00000171873	20	4220630	4249287	adrenoceptor alpha 1D	-0.496002	2.35468	0.833164		-0.00939127	0.329592
-0.620554	-1.06394	0.66308	1.02141	ADRA2A	150	ENSG00000150594	10	111077029	111080907	adrenoceptor alpha 2A	1.70121	0.287234	3.1661e-09	2.90964e-08	1.60818	0.292954
-0.839681	-0.877781	0.701256	1.01621	ADRA2B	151	ENSG00000274286	2	96112876	96116571	adrenoceptor alpha 2B	0.971375	0.4037	0.0161202	0.0429238	0.642854	0.438723
-0.95383	-0.522379	0.134891	1.34132	ADRA2C	152	ENSG00000184160	4	3766348	3768526	adrenoceptor alpha 2C	0.58602	0.392646	0.135571	0.251254	0.292756	0.326979
1.1239	-0.624746	-1.03123	0.532081	ADRB1	153	ENSG00000043591	10	114043866	114046904	adrenoceptor beta 1	-0.150289	0.420687	0.720906	0.828016	-0.0582317	0.264241
1.00028	0.666428	-0.544956	-1.12175	ADRB2	154	ENSG00000169252	5	148826611	148828623	adrenoceptor beta 2	-0.85872	0.581065	0.139451	0.256612	-0.255518	0.384838
-0.512425	-0.674068	-0.295339	1.48183	ADRM1	11047	ENSG00000130706	20	62302093	62308862	ADRM1 26S proteasome ubiquitin receptor	0.113063	0.0811631	0.163611	0.29017	0.107076	0.0791459
-0.986025	-0.724915	0.716553	0.994387	ADSL	158	ENSG00000239900	22	40346461	40390463	adenylosuccinate lyase	0.652303	0.150035	1.37586e-05	7.35727e-05	0.606126	0.151517
1.08479	-1.32055	0.278516	-0.0427556	ADSS1	122622	ENSG00000185100	14	104724229	104747325	adenylosuccinate synthase 1	0.0177328	0.747126	0.981064	0.989577	0.00330834	0.303646
-1.28419	-0.285808	0.649475	0.920521	ADSS2	159	ENSG00000035687	1	244408494	244451909	adenylosuccinate synthase 2	0.11904	0.0713154	0.0950766	0.189025	0.114102	0.0699921
1.12433	0.297232	-0.14638	-1.27519	AEBP1	165	ENSG00000106624	7	44104345	44114562	AE binding protein 1	-0.413962	2.34659	0.859972		-0.0081322	0.329423
-1.15511	-0.515531	0.788247	0.882393	AEBP2	121536	ENSG00000139154	12	19404045	19720801	AE binding protein 2	0.0876523	0.0701654	0.211583	0.353819	0.0840627	0.0687941
-1.10127	-0.592801	0.826328	0.867742	AEN	64782	ENSG00000181026	15	88621337	88632281	apoptosis enhancing nuclease	0.21427	0.0721497	0.00298	0.00977663	0.206171	0.0712184
1.35141	0.162107	-0.788674	-0.724845	AFAP1	60312	ENSG00000196526	4	7758714	7939926	actin filament associated protein 1	-0.36405	0.104897	0.000519398	0.00203744	-0.341706	0.103771
0.60649	0.985941	-1.23903	-0.3534	AFAP1-AS1	84740	ENSG00000272620	4	7754077	7778928	AFAP1 antisense RNA 1	-0.112894	0.0804114	0.160333	0.285691	-0.106878	0.0784662
0.756573	-0.645625	0.945678	-1.05663	AFAP1L1	134265	ENSG00000157510	5	149271859	149343637	actin filament associated protein 1 like 1	-0.0226304	0.348342	0.948201	0.973197	-0.010424	0.240598
1.01201	0.578835	-1.22866	-0.362181	AFAP1L2	84632	ENSG00000169129	10	114294824	114404756	actin filament associated protein 1 like 2	-0.222582	0.14743	0.131109	0.244651	-0.190281	0.139149
1.06048	0.61732	-0.630577	-1.04722	AFDN	4301	ENSG00000130396	6	167826911	167972023	afadin, adherens junction formation factor	-0.314885	0.0679543	3.59067e-06	2.11783e-05	-0.305877	0.0675464
0.757799	-1.39827	-0.0441096	0.684577	AFDN-DT		ENSG00000198221	6	167822103	167826833		0.319423	2.09633	0.878893		0.00815599	0.328498
1.22646	0.233433	-0.296547	-1.16334	AFF1	4299	ENSG00000172493	4	86935002	87141039	ALF transcription elongation factor 1	-0.22402	0.0819561	0.00626811	0.0188418	-0.213204	0.0806113
1.11682	-0.401771	0.459678	-1.17473	AFF4	27125	ENSG00000072364	5	132875395	132963634	ALF transcription elongation factor 4	-0.0658645	0.0718449	0.359269	0.522046	-0.0628433	0.0702955
0.193452	1.33787	-0.755857	-0.775468	AFG1L	246269	ENSG00000135537	6	108294991	108526796	AFG1 like ATPase	-0.33932	0.250991	0.176401	0.307325	-0.232382	0.222149
-0.149967	-1.34768	0.607761	0.889886	AFG3L1P	172	ENSG00000223959	16	89972581	90002161	AFG3 like matrix AAA peptidase subunit 1, pseudogene	0.229328	0.131654	0.0815257	0.167051	0.202756	0.125949
-0.952164	-0.7148	0.522791	1.14417	AFG3L2	10939	ENSG00000141385	18	12328944	12377227	AFG3 like matrix AAA peptidase subunit 2	0.324232	0.0716899	6.10571e-06	3.46606e-05	0.314129	0.0712516
-1.27672	-0.182426	1.09846	0.360679	AFMID	125061	ENSG00000183077	17	78187358	78207702	arylformamidase	0.239782	0.131469	0.0681711	0.144202	0.212336	0.12628
1.45354	-0.225465	-0.4112	-0.816879	AFTPH	54812	ENSG00000119844	2	64524299	64593005	aftiphilin	-0.0594231	0.0664373	0.371095	0.534346	-0.0570969	0.0651902
-0.137601	-1.19805	1.23957	0.0960808	AFTPH-DT	101927402	ENSG00000260101	2	64522187	64524093	AFTPH divergent transcript	0.66027	1.06231	0.534245		0.0602524	0.324616
0.694815	1.0095	-1.00346	-0.700859	AGA	175	ENSG00000038002	4	177430774	177442437	aspartylglucosaminidase	-0.324806	0.143883	0.0239809	0.0602696	-0.285586	0.139545
0.795336	0.350386	-1.46402	0.318299	AGA-DT		ENSG00000250131	4	177442519	177681381		-1.35281	1.57666	0.390881		-0.0589087	0.332994
-0.834662	-0.889366	0.976537	0.747491	AGAP1	116987	ENSG00000157985	2	235494043	236131800	ArfGAP with GTPase domain, ankyrin repeat and PH domain 1	0.214865	0.0655223	0.0010408	0.00382914	0.20817	0.0648194
-1.21882	0.778019	-0.416791	0.857589	AGAP1-IT1	100506749	ENSG00000235529	2	235505553	235507566	AGAP1 intronic transcript 1	0.129564	0.439868	0.768335	0.861033	0.047742	0.268065
0.886611	-1.36635	-0.100669	0.580408	AGAP10P		ENSG00000230869	10	45678692	45700532		0.00860465	2.01092	0.996586		0.000345454	0.327982
0.83364	0.831554	-0.495607	-1.16959	AGAP13P		ENSG00000243289	10	46816516	46837947		-0.481959	0.513974	0.348394	0.510818	-0.15194	0.309788
-1.03763	0.667923	1.02416	-0.654456	AGAP14P		ENSG00000279058	10	46337224	46358714		0.265112	1.35231	0.844576		0.015129	0.323573
0.19166	1.33212	-0.879709	-0.644073	AGAP2	116986	ENSG00000135439	12	57723761	57742157	ArfGAP with GTPase domain, ankyrin repeat and PH domain 2	-0.568158	0.274731	0.038635	0.0901059	-0.408415	0.267764
-1.06764	-0.626733	0.720882	0.97349	AGAP2-AS1	100130776	ENSG00000255737	12	57726271	57728356	AGAP2 antisense RNA 1	0.66895	0.222368	0.00262708	0.00873843	0.565855	0.226307
0.661832	0.985172	-1.16636	-0.480645	AGAP3	116988	ENSG00000133612	7	151085831	151144436	ArfGAP with GTPase domain, ankyrin repeat and PH domain 3	-0.31726	0.084124	0.000162376	0.000711085	-0.303316	0.0833513
0.124729	-0.822429	1.36489	-0.667187	AGAP4	119016	ENSG00000188234	10	45825594	45853875	ArfGAP with GTPase domain, ankyrin repeat and PH domain 4	0.253199	0.43009	0.556054	0.704257	0.0976128	0.273618
1.46697	-0.277102	-0.416974	-0.77289	AGAP5	729092	ENSG00000172650	10	73674287	73698109	ArfGAP with GTPase domain, ankyrin repeat and PH domain 5	-1.06426	2.12072	0.615782		-0.0257447	0.330025
-0.456189	0.896708	-1.19257	0.752052	AGAP6	414189	ENSG00000204149	10	49982190	50011654	ArfGAP with GTPase domain, ankyrin repeat and PH domain 6	-0.18185	0.731449	0.803658	0.885018	-0.0308482	0.304416
-0.806567	1.44194	-0.132744	-0.502629	AGAP7P		ENSG00000264204	10	46109621	46131358		-0.60217	2.27847	0.791559		-0.0123334	0.329483
1.11004	0.104113	0.107027	-1.32118	AGAP9	642517	ENSG00000204172	10	47501854	47523638	ArfGAP with GTPase domain, ankyrin repeat and PH domain 9	-0.587827	0.356904	0.0995547	0.196125	-0.331869	0.318328
-0.472999	0.684026	0.963625	-1.17465	AGBL2	79841	ENSG00000165923	11	47659591	47715389	AGBL carboxypeptidase 2	-0.0648148	0.807728	0.936044	0.967278	-0.00897542	0.30786
0.0628303	-1.22509	-0.0590947	1.22136	AGBL3	340351	ENSG00000146856	7	134986508	135147963	AGBL carboxypeptidase 3	0.503476	0.430204	0.241872	0.390941	0.211954	0.309935
-1.43594	0.680881	0.069764	0.685291	AGBL5	60509	ENSG00000084693	2	27042364	27070622	AGBL carboxypeptidase 5	0.0448885	0.12334	0.715902	0.82515	0.0395083	0.115832
0.605354	1.09202	-0.864548	-0.832825	AGER	177	ENSG00000204305	6	32180968	32184322	advanced glycosylation end-product specific receptor	-0.775889	0.319678	0.0152204	0.0408844	-0.56131	0.330793
-0.609237	-0.149266	1.45603	-0.697523	AGFG1	3267	ENSG00000173744	2	227472152	227561217	ArfGAP with FG repeats 1	0.0493982	0.0693597	0.476339	0.633579	0.047376	0.067956
1.24934	0.246572	-1.10814	-0.387776	AGFG2	3268	ENSG00000106351	7	100539203	100568220	ArfGAP with FG repeats 2	-0.164304	0.099278	0.0979268	0.193653	-0.151763	0.0961256
-1.09223	0.992293	0.689261	-0.589319	AGGF1	55109	ENSG00000164252	5	77029251	77065234	angiogenic factor with G-patch and FHA domains 1	0.00335114	0.109434	0.975571	0.986591	0.00324216	0.103975
0.31172	0.375346	-1.46735	0.780281	AGGF1P2		ENSG00000233435	10	133640789	133642894		-0.347157	1.4748	0.813904		-0.0167483	0.324963
-1.04341	-0.66383	0.772156	0.935089	AGK	55750	ENSG00000006530	7	141551278	141655244	acylglycerol kinase	0.368337	0.0969632	0.000145442	0.000642527	0.34929	0.0962323
-0.479433	-1.11639	1.15181	0.444018	AGL	178	ENSG00000162688	1	99850361	99924023	amylo-alpha-1, 6-glucosidase, 4-alpha-glucanotransferase	0.247441	0.0803854	0.00208271	0.00713962	0.236499	0.0792739
-0.993746	-0.715464	0.713394	0.995816	AGMAT	79814	ENSG00000116771	1	15571699	15585051	agmatinase	0.633568	0.132085	1.61319e-06	1.00797e-05	0.597658	0.13307
1.11391	0.436929	-0.347789	-1.20305	AGMO	392636	ENSG00000187546	7	15200317	15562015	alkylglycerol monooxygenase	-0.277216	0.143167	0.0528303	0.117061	-0.241645	0.137393
-0.812635	-0.895876	1.05114	0.65737	AGO1	26523	ENSG00000092847	1	35869808	35930532	argonaute RISC component 1	0.564886	0.0823253	6.8079e-12	8.62168e-11	0.550758	0.0824952
0.463277	-1.35869	0.966583	-0.0711752	AGO2	27161	ENSG00000123908	8	140520156	140635633	argonaute RISC catalytic component 2	0.093555	0.0780073	0.230407	0.376567	0.0889408	0.0761202
0.400545	-1.40141	0.933293	0.067576	AGO3	192669	ENSG00000126070	1	35930718	36072500	argonaute RISC catalytic component 3	0.162886	0.115549	0.158637	0.283221	0.146857	0.110567
1.24217	0.361581	-0.943736	-0.660019	AGO4	192670	ENSG00000134698	1	35808016	35857890	argonaute RISC component 4	-0.484124	0.13711	0.000414123	0.00166386	-0.444135	0.136598
-1.42198	0.492572	0.0751978	0.854214	AGPAT1	10554	ENSG00000204310	6	32168212	32178096	1-acylglycerol-3-phosphate O-acyltransferase 1	0.073643	0.0970435	0.447933	0.60684	0.0679612	0.0934197
0.988612	0.626489	-1.21121	-0.403889	AGPAT2	10555	ENSG00000169692	9	136673143	136687457	1-acylglycerol-3-phosphate O-acyltransferase 2	-0.293113	0.104137	0.00488249	0.0151775	-0.272932	0.102235
-0.342313	-1.05119	0.0615825	1.33192	AGPAT3	56894	ENSG00000160216	21	43865223	43987592	1-acylglycerol-3-phosphate O-acyltransferase 3	0.0887166	0.0680486	0.192327	0.328676	0.085292	0.0667766
0.729295	0.956352	-0.585123	-1.10052	AGPAT4	56895	ENSG00000026652	6	161129967	161274061	1-acylglycerol-3-phosphate O-acyltransferase 4	-1.09115	0.23283	2.77987e-06	1.67254e-05	-1.00192	0.239855
-1.03737	-0.675481	0.838521	0.874335	AGPAT5	55326	ENSG00000155189	8	6708642	6761503	1-acylglycerol-3-phosphate O-acyltransferase 5	0.501512	0.0720848	3.46986e-12	4.54584e-11	0.490528	0.0721457
-0.85209	-0.850936	1.07479	0.62824	AGPS	8540	ENSG00000018510	2	177392746	177567024	alkylglycerone phosphate synthase	0.356599	0.0607722	4.41601e-09	3.96245e-08	0.349145	0.0605883
1.17418	0.381779	-1.14201	-0.413947	AGR2	10551	ENSG00000106541	7	16791811	16833433	anterior gradient 2, protein disulphide isomerase family member	-0.114626	0.0500139	0.0219126	0.0558281	-0.108177	0.0495252
0.97665	0.726705	-1.03518	-0.668176	AGR3	155465	ENSG00000173467	7	16859412	16881987	anterior gradient 3, protein disulphide isomerase family member	-0.438675	0.290577	0.131129	0.244651	-0.280404	0.257888
0.828843	0.901417	-0.907357	-0.822903	AGRN	375790	ENSG00000188157	1	1020120	1056118	agrin	-0.503863	0.0544273	2.09192e-20	5.45826e-19	-0.497871	0.0544412
1.23632	-0.128789	0.094928	-1.20246	AGT	183	ENSG00000135744	1	230690776	230745576	angiotensinogen	-1.42471	1.3046	0.274806		-0.0891922	0.339267
-1.31784	0.18013	1.10906	0.0286519	AGTPBP1	23287	ENSG00000135049	9	85546539	85742029	ATP/GTP binding carboxypeptidase 1	0.136804	0.114972	0.234088	0.381103	0.123343	0.109846
-0.125222	1.38747	-0.993494	-0.26875	AGTRAP	57085	ENSG00000177674	1	11736084	11754802	angiotensin II receptor associated protein	-0.149105	0.166308	0.369954	0.533208	-0.120553	0.151522
-0.77455	-0.934232	1.03785	0.670934	AHCTF1	25909	ENSG00000153207	1	246839098	246931948	AT-hook containing transcription factor 1	0.43266	0.0687918	3.18661e-10	3.32248e-09	0.422726	0.0687023
0.0549307	-1.10811	-0.252666	1.30585	AHCTF1P1		ENSG00000226121	2	161500885	161507705		0.533826	0.59109	0.366462	0.529682	0.137717	0.318044
-0.969708	-0.720829	0.609563	1.08097	AHCY	191	ENSG00000101444	20	34280268	34311802	adenosylhomocysteinase	0.406675	0.0582494	2.91781e-12	3.87805e-11	0.399607	0.0581674
-1.33096	0.592467	-0.180672	0.91917	AHCYL1	10768	ENSG00000168710	1	109984765	110023742	adenosylhomocysteinase like 1	0.0188304	0.0606298	0.75612	0.852126	0.0182552	0.0596564
1.02072	0.693831	-0.798633	-0.91592	AHCYL2	23382	ENSG00000158467	7	129225030	129430211	adenosylhomocysteinase like 2	-0.432704	0.0832578	2.02352e-07	1.4559e-06	-0.417921	0.0830712
1.15974	0.508712	-0.880911	-0.787538	AHDC1	27245	ENSG00000126705	1	27534035	27604431	AT-hook DNA binding motif containing 1	-0.240272	0.143882	0.0949341	0.188765	-0.2074	0.136768
1.24424	0.337976	-0.583798	-0.998414	AHI1	54806	ENSG00000135541	6	135283407	135498434	Abelson helper integration site 1	-0.121424	0.0982393	0.216456	0.359452	-0.111996	0.0947868
0.300201	0.307131	-1.45065	0.843313	AHI1-DT	100131814	ENSG00000231028	6	135497422	135813990	AHI1 divergent transcript	-0.262945	0.968003	0.785901	0.873055	-0.0276908	0.31589
1.29331	0.221759	-0.50215	-1.01292	AHNAK	79026	ENSG00000124942	11	62433542	62556235	AHNAK nucleoprotein	-0.654008	0.247345	0.00819048	0.0237526	-0.52359	0.250851
1.14	0.381947	-0.31581	-1.20614	AHNAK2	113146	ENSG00000185567	14	104937244	104978374	AHNAK nucleoprotein 2	-0.646473	0.248526	0.00928921	0.0265647	-0.517127	0.251691
0.84315	0.887764	-0.827098	-0.903815	AHR	196	ENSG00000106546	7	16916359	17346152	aryl hydrocarbon receptor	-0.439678	0.0676289	7.96102e-11	8.85145e-10	-0.42983	0.0675637
-0.205198	-1.11381	0.00857129	1.31044	AHRR	57491	ENSG00000063438	5	321714	438291	aryl hydrocarbon receptor repressor	0.554406	0.505601	0.272847	0.427322	0.186095	0.322357
-0.852945	-0.841979	0.595297	1.09963	AHSA1	10598	ENSG00000100591	14	77457870	77469472	activator of HSP90 ATPase activity 1	0.411253	0.0642868	1.58291e-10	1.70874e-09	0.402625	0.0641727
0.926861	0.720136	-1.18821	-0.458784	AHSA2P	130872	ENSG00000173209	2	61177418	61191203	activator of HSP90 ATPase homolog 2, pseudogene	-0.560271	0.115857	1.32552e-06	8.36951e-06	-0.531814	0.11614
-0.588569	-1.03161	1.18216	0.438024	AIDA	64853	ENSG00000186063	1	222668013	222713210	axin interactor, dorsalization associated	0.310149	0.105921	0.00341028	0.0110186	0.289007	0.104185
-0.182649	0.807495	0.716989	-1.34183	AIDAP1		ENSG00000230154	2	11308025	11308941		-0.496002	2.35468	0.833164		-0.00939127	0.329592
0.792254	0.474434	-1.4534	0.186715	AIDAP2	646890	ENSG00000251429	4	158270378	158278676	AIDA pseudogene 2	-1.64125	1.68682	0.330562		-0.06306	0.335066
-0.773722	-0.949816	0.945176	0.778362	AIF1L	83543	ENSG00000126878	9	131096476	131123152	allograft inflammatory factor 1 like	0.563842	0.0855687	4.41763e-11	5.071e-10	0.548546	0.0857325
-0.949488	-0.751288	0.64096	1.05982	AIFM1	9131	ENSG00000156709	X	130124666	130165879	apoptosis inducing factor mitochondria associated 1	0.378953	0.0643134	3.8089e-09	3.44749e-08	0.370459	0.0641419
0.00635182	0.0884411	-1.26962	1.17482	AIFM2	84883	ENSG00000042286	10	70098223	70132934	apoptosis inducing factor mitochondria associated 2	-0.00200827	0.0951059	0.983153	0.990696	-0.00178184	0.0914241
0.149814	1.25987	-0.259499	-1.15019	AIFM3	150209	ENSG00000183773	22	20965108	20981360	apoptosis inducing factor mitochondria associated 3	-0.49209	0.376388	0.191076	0.327184	-0.24394	0.299718
0.734089	0.981695	-0.970651	-0.745133	AIG1	51390	ENSG00000146416	6	143060496	143341058	androgen induced 1	-0.195884	0.0827678	0.0179486	0.0471955	-0.185851	0.0811977
-0.954731	-0.628271	0.322025	1.26098	AIMP1	9255	ENSG00000164022	4	106315544	106349456	aminoacyl tRNA synthetase complex interacting multifunctional protein 1	0.127261	0.0726288	0.0797364	0.163989	0.121888	0.0712484
-0.929186	-0.734783	0.506168	1.1578	AIMP2	7965	ENSG00000106305	7	6009255	6023834	aminoacyl tRNA synthetase complex interacting multifunctional protein 2	0.260407	0.108058	0.0159574	0.0425559	0.240396	0.105497
-0.380234	1.49305	-0.497035	-0.61578	AIP	9049	ENSG00000110711	11	67468174	67491154	aryl hydrocarbon receptor interacting protein	-0.093168	0.118964	0.433534	0.593528	-0.0827441	0.112643
0.793586	0.651687	-1.39387	-0.0513987	AJM1	389813	ENSG00000232434	9	136842478	136848801	apical junction component 1 homolog	-0.306676	0.346515	0.37614	0.539763	-0.154676	0.258967
0.791351	0.937216	-0.890884	-0.837683	AJUBA	84962	ENSG00000129474	14	22971177	22982551	ajuba LIM protein	-0.792601	0.064632	1.42612e-34	9.06719e-33	-0.784711	0.0647895
-0.567801	-1.11914	0.81014	0.876806	AJUBA-DT	107984660	ENSG00000258457	14	22982698	22999078	AJUBA divergent transcript	0.141937	0.758261	0.851514	0.917355	0.0233158	0.305496
-0.680008	-1.01828	1.02032	0.677973	AK1	203	ENSG00000106992	9	127866486	127877675	adenylate kinase 1	0.0978375	0.140436	0.486011	0.642774	0.0837652	0.130259
-1.21989	-0.414664	0.862246	0.772306	AK2	204	ENSG00000004455	1	33007986	33080996	adenylate kinase 2	0.290218	0.0676818	1.80313e-05	9.4095e-05	0.281698	0.0672259
-1.42914	0.128234	0.432568	0.868336	AK3	50808	ENSG00000147853	9	4709556	4742043	adenylate kinase 3	0.0579298	0.0643263	0.367821	0.531154	0.0559182	0.0632132
-0.383425	-1.23589	0.894683	0.724635	AK3P3	100419075	ENSG00000230042	7	23129178	23129841	AK3 pseudogene 3	0.836134	1.27138	0.510757		0.0544955	0.327938
-0.358074	-1.19756	0.440436	1.11519	AK4	205	ENSG00000162433	1	65147549	65232145	adenylate kinase 4	0.0909639	0.0929738	0.327885	0.489799	0.0845396	0.0898167
-0.484241	-0.424103	-0.588205	1.49655	AK4P1		ENSG00000263535	17	31345519	31346190		0.694997	0.646799	0.28259	0.439134	0.158773	0.336454
0.566469	-0.87233	-0.81438	1.12024	AK4P3		ENSG00000233381	12	31615023	31652095		0.0444765	0.245453	0.856209	0.920567	0.0291377	0.197686
-0.735446	-0.986108	0.909956	0.811598	AK6	102157402	ENSG00000085231	5	69350984	69370013	adenylate kinase 6	0.642063	0.107448	2.29272e-09	2.15662e-08	0.618534	0.107943
0.921824	0.530957	-0.0888008	-1.36398	AK7	122481	ENSG00000140057	14	96392128	96489427	adenylate kinase 7	-0.382154	0.230488	0.0973124	0.192732	-0.282139	0.213457
-0.370911	1.16703	-1.16733	0.37122	AK8	158067	ENSG00000165695	9	132725578	132878777	adenylate kinase 8	-1.24023	1.89697	0.513243		-0.0366523	0.330706
0.565872	0.419988	-1.49728	0.51142	AK9	221264	ENSG00000155085	6	109492855	109691217	adenylate kinase 9	-0.19523	0.270411	0.47031	0.628572	-0.120262	0.217428
-0.759436	-0.952023	0.693923	1.01754	AKAP1	8165	ENSG00000121057	17	57085092	57121346	A-kinase anchoring protein 1	0.227194	0.0616249	0.000227164	0.000964178	0.221106	0.06107
1.05581	-0.898433	-0.808654	0.651281	AKAP1-DT		ENSG00000263004	17	57071814	57085041		-0.101108	0.734772	0.890553	0.941314	-0.0169929	0.3032
0.732085	0.948902	-0.565923	-1.11506	AKAP10	11216	ENSG00000108599	17	19904302	19978343	A-kinase anchoring protein 10	-0.122521	0.0878554	0.163142	0.289537	-0.114873	0.0854048
0.710617	-0.635841	0.984359	-1.05913	AKAP11	11215	ENSG00000023516	13	42272152	42323261	A-kinase anchoring protein 11	-0.00818974	0.0795003	0.917951	0.957795	-0.00764395	0.0773158
-0.252429	-1.15005	1.26257	0.13991	AKAP12	9590	ENSG00000131016	6	151239967	151358559	A-kinase anchoring protein 12	0.542367	0.376606	0.149827	0.271	0.279013	0.312145
1.32904	0.110792	-0.415917	-1.02391	AKAP13	11214	ENSG00000170776	15	85380571	85749358	A-kinase anchoring protein 13	-0.405557	0.181105	0.0251338	0.0626715	-0.339341	0.175777
0.312985	1.26491	-0.958033	-0.619859	AKAP17A	8227	ENSG00000197976	X	1591604	1602520	A-kinase anchoring protein 17A	-0.290222	0.0990063	0.0033749	0.0109204	-0.272028	0.0974467
-0.393012	-1.22331	0.95445	0.661873	AKAP3	10566	ENSG00000111254	12	4615508	4649051	A-kinase anchoring protein 3	0.928419	0.790814	0.240393	0.388969	0.152668	0.349082
0.916101	0.622321	-0.226024	-1.3124	AKAP5	9495	ENSG00000179841	14	64465499	64474503	A-kinase anchoring protein 5	-0.417397	0.25338	0.0994929	0.196037	-0.294166	0.233019
0.948144	0.778724	-0.905707	-0.821161	AKAP6	9472	ENSG00000151320	14	32329298	32837684	A-kinase anchoring protein 6	-0.503766	0.459406	0.272834	0.427322	-0.190258	0.311211
-1.33819	0.535994	-0.146709	0.948908	AKAP7	9465	ENSG00000118507	6	131135467	131283535	A-kinase anchoring protein 7	0.0750044	0.238987	0.753641	0.850469	0.0498893	0.19525
0.349184	-1.39613	0.0870941	0.95985	AKAP8	10270	ENSG00000105127	19	15353385	15379815	A-kinase anchoring protein 8	0.0957539	0.101638	0.346137	0.50875	0.0878867	0.0975417
0.931869	0.792669	-0.95249	-0.772048	AKAP8L	26993	ENSG00000011243	19	15380050	15419141	A-kinase anchoring protein 8 like	-0.373475	0.0872693	1.87255e-05	9.72614e-05	-0.357681	0.0867497
1.39335	-0.615598	0.045394	-0.823143	AKAP9	10142	ENSG00000127914	7	91940840	92110673	A-kinase anchoring protein 9	-0.126345	0.157477	0.422374	0.584102	-0.103776	0.144084
0.766198	0.922144	-1.10622	-0.582119	AKIP1	56672	ENSG00000166452	11	8911139	8920084	A-kinase interacting protein 1	-0.0884369	0.137162	0.519082	0.672137	-0.0757118	0.127487
-1.23746	-0.0977127	1.20041	0.134767	AKIRIN1	79647	ENSG00000174574	1	38991276	39006059	akirin 1	0.0532728	0.0645625	0.409295	0.571772	0.0513867	0.0634274
0.861518	0.869483	-0.907952	-0.823049	AKIRIN2	55122	ENSG00000135334	6	87674860	87702233	akirin 2	-0.349574	0.117178	0.00285179	0.00939559	-0.322179	0.115414
0.149018	1.11447	-1.31642	0.0529288	AKNA	80709	ENSG00000106948	9	114334156	114394405	AT-hook transcription factor	-0.0278306	0.146596	0.84943	0.916187	-0.0231437	0.134222
1.08878	0.532579	-1.1397	-0.481667	AKNAD1	254268	ENSG00000162641	1	108815898	108963484	AKNA domain containing 1	-1.26342	1.20851	0.295822		-0.0924757	0.338401
-1.00171	-0.68367	0.609301	1.07607	AKR1A1	10327	ENSG00000117448	1	45550543	45570049	aldo-keto reductase family 1 member A1	0.189382	0.0929377	0.0415772	0.0957834	0.177299	0.0906436
0.584229	-0.846011	-0.846011	1.10779	AKR1B1	231	ENSG00000085662	7	134442356	134459284	aldo-keto reductase family 1 member B	0.820552	2.77783	0.767693		0.0119317	0.330502
-0.603261	-1.05164	0.543906	1.11099	AKR1B10	57016	ENSG00000198074	7	134527567	134541412	aldo-keto reductase family 1 member B10	0.668207	0.148164	6.48523e-06	3.66414e-05	0.62366	0.149434
1.09647	0.581727	-0.679108	-0.999085	AKR1C1	1645	ENSG00000187134	10	4963253	4983283	aldo-keto reductase family 1 member C1	-0.354994	0.157298	0.0240193	0.0603369	-0.306674	0.152482
0.999343	-0.00300858	-1.36562	0.36929	AKR1C2	1646	ENSG00000151632	10	4987775	5018031	aldo-keto reductase family 1 member C2	-0.0886315	0.440712	0.840613	0.910421	-0.0319026	0.266543
0.781991	0.942616	-0.782201	-0.942405	AKR1C3	8644	ENSG00000196139	10	5035354	5107686	aldo-keto reductase family 1 member C3	-0.563292	0.0629044	3.40608e-19	8.20038e-18	-0.554939	0.062993
0.75113	0.956786	-1.02985	-0.678064	AKR1C4	1109	ENSG00000198610	10	5195462	5218949	aldo-keto reductase family 1 member C4	-0.727614	0.45947	0.113286	0.217349	-0.313095	0.373822
-0.806567	1.44194	-0.132744	-0.502629	AKR1C7P	648947	ENSG00000215267	10	5275173	5288470	aldo-keto reductase family 1 member C7, pseudogene	-0.60217	2.27847	0.791559		-0.0123334	0.329483
-0.738225	0.0902811	1.38155	-0.73361	AKR1E2	83592	ENSG00000165568	10	4786629	4848062	aldo-keto reductase family 1 member E2	0.139546	0.231935	0.5474	0.696846	0.0953006	0.194146
-1.28637	-0.202982	0.432438	1.05691	AKR7A2	8574	ENSG00000053371	1	19303965	19312144	aldo-keto reductase family 7 member A2	0.184483	0.106616	0.0835663	0.170404	0.169191	0.103103
-1.08261	-0.542465	1.13908	0.485998	AKR7A3	22977	ENSG00000162482	1	19282573	19288770	aldo-keto reductase family 7 member A3	0.759539	0.312412	0.0150487	0.040451	0.554876	0.322877
-0.0696824	-0.532756	1.42591	-0.823469	AKR7L	246181	ENSG00000211454	1	19265982	19274194	aldo-keto reductase family 7 like (gene/pseudogene)	0.0642124	0.304458	0.83296	0.904939	0.035351	0.225464
-0.466465	-0.60564	-0.42335	1.49545	AKT1	207	ENSG00000142208	14	104769349	104795751	AKT serine/threonine kinase 1	0.0593974	0.0634516	0.349219	0.511566	0.0574198	0.062367
-0.583944	-0.940482	0.208784	1.31564	AKT1S1	84335	ENSG00000204673	19	49869033	49878459	AKT1 substrate 1	0.20316	0.10211	0.0466331	0.105368	0.187991	0.0991875
-1.07941	-0.619877	0.79113	0.908155	AKT2	208	ENSG00000105221	19	40230317	40285536	AKT serine/threonine kinase 2	0.300122	0.0717458	2.87531e-05	0.000145182	0.290017	0.0712249
-1.08394	-0.254514	1.32671	0.0117466	AKT3	10000	ENSG00000117020	1	243488233	243851079	AKT serine/threonine kinase 3	0.601259	0.724031	0.406294	0.569192	0.109127	0.322942
0.78963	0.914585	-0.642534	-1.06168	AKTIP	64400	ENSG00000166971	16	53491040	53504411	AKT interacting protein	-0.354361	0.101319	0.00046969	0.0018612	-0.333551	0.100321
0.938539	0.78986	-0.892342	-0.836057	ALAD	210	ENSG00000148218	9	113386312	113401290	aminolevulinate dehydratase	-0.608951	0.0811549	6.21078e-14	9.70364e-13	-0.595259	0.0813498
0.889756	0.841396	-0.834389	-0.896762	ALAS1	211	ENSG00000023330	3	52198086	52214327	5'-aminolevulinate synthase 1	-0.623673	0.0649273	7.56344e-22	2.18582e-20	-0.614972	0.0650453
0.32026	1.27485	-0.797555	-0.797555	ALB	213	ENSG00000163631	4	73397114	73421482	albumin	-4.07345	2.44174	0.0952652		-0.0653702	0.340373
1.32596	0.181526	-0.563206	-0.944282	ALCAM	214	ENSG00000170017	3	105366909	105576900	activated leukocyte cell adhesion molecule	-0.15789	0.0692838	0.0226735	0.0574845	-0.151888	0.0681875
-1.42728	0.0551349	0.590048	0.782097	ALDH16A1	126133	ENSG00000161618	19	49453225	49471050	aldehyde dehydrogenase 16 family member A1	0.301917	0.147025	0.0400231	0.0928704	0.262869	0.141781
-0.619314	-1.07886	0.921993	0.776177	ALDH18A1	5832	ENSG00000059573	10	95605941	95656711	aldehyde dehydrogenase 18 family member A1	0.376887	0.0583855	1.08118e-10	1.19144e-09	0.369905	0.0582434
-1.13961	-0.515769	1.00814	0.647243	ALDH1A1	216	ENSG00000165092	9	72900671	73080442	aldehyde dehydrogenase 1 family member A1	0.174757	0.0643854	0.00664286	0.0198458	0.169144	0.0635916
0.719944	0.987989	-1.00733	-0.700601	ALDH1A3	220	ENSG00000184254	15	100877714	100916626	aldehyde dehydrogenase 1 family member A3	-0.820097	0.0912691	2.57597e-19	6.24042e-18	-0.804586	0.0916955
1.41641	-0.00716765	-0.723835	-0.68541	ALDH1A3-AS1	101927751	ENSG00000259583	15	100892343	100919391	ALDH1A3 antisense RNA 1	-0.127187	0.350979	0.71707	0.825767	-0.0604162	0.244448
-0.931698	-0.78518	0.714223	1.00265	ALDH1B1	219	ENSG00000137124	9	38392702	38398661	aldehyde dehydrogenase 1 family member B1	1.17264	0.0919014	2.75138e-37	1.93055e-35	1.16043	0.0922826
0.953464	0.773555	-0.838802	-0.888217	ALDH1L1	10840	ENSG00000144908	3	126103562	126197994	aldehyde dehydrogenase 1 family member L1	-0.604879	0.163688	0.000219615	0.000935075	-0.548392	0.164899
-1.1938	1.1013	0.469165	-0.376668	ALDH1L1-AS2	100862662	ENSG00000246022	3	126180012	126210169	ALDH1L1 antisense RNA 2	-0.0586309	1.64811	0.971622		-0.00207643	0.32616
0.895681	0.835694	-0.849196	-0.882178	ALDH1L2	160428	ENSG00000136010	12	105019784	105107643	aldehyde dehydrogenase 1 family member L2	-3.41695	0.120461	5.35353e-177	1.66784e-173	-3.40861	0.120567
0.905864	0.809648	-1.0196	-0.69591	ALDH2	217	ENSG00000111275	12	111766887	111817532	aldehyde dehydrogenase 2 family member	-0.51954	0.0567284	5.26785e-20	1.33644e-18	-0.512485	0.0567591
-1.26392	-0.33621	0.732052	0.86808	ALDH3A1	218	ENSG00000108602	17	19737984	19748943	aldehyde dehydrogenase 3 family member A1	0.274303	0.0721528	0.000143705	0.000635573	0.264924	0.0715231
-0.882357	-0.84357	0.964018	0.761909	ALDH3A2	224	ENSG00000072210	17	19648136	19685760	aldehyde dehydrogenase 3 family member A2	0.241367	0.0494511	1.05593e-06	6.77997e-06	0.236533	0.0491941
0.814955	0.915548	-0.877514	-0.852989	ALDH3B1	221	ENSG00000006534	11	68008578	68029282	aldehyde dehydrogenase 3 family member B1	-1.34638	0.121143	1.07275e-28	4.76075e-27	-1.32658	0.121829
0.514093	1.15334	-0.746098	-0.921334	ALDH3B2	222	ENSG00000132746	11	67662155	67681224	aldehyde dehydrogenase 3 family member B2	-0.73232	0.297378	0.0137937	0.0375637	-0.545497	0.305237
-0.244659	-0.989627	-0.157147	1.39143	ALDH4A1	8659	ENSG00000159423	1	18871430	18902724	aldehyde dehydrogenase 4 family member A1	0.150067	0.140307	0.284817	0.441847	0.128938	0.131185
-0.299087	-0.311529	1.4514	-0.840788	ALDH5A1	7915	ENSG00000112294	6	24494867	24537207	aldehyde dehydrogenase 5 family member A1	0.021196	0.0892513	0.81228	0.891048	0.0198582	0.0862274
-1.08285	-0.596908	1.01357	0.666192	ALDH6A1	4329	ENSG00000119711	14	74056847	74084492	aldehyde dehydrogenase 6 family member A1	0.611822	0.13273	4.03562e-06	2.36683e-05	0.575205	0.133717
-1.32266	-0.162192	0.495563	0.989286	ALDH7A1	501	ENSG00000164904	5	126531200	126595362	aldehyde dehydrogenase 7 family member A1	0.154214	0.0706959	0.0291559	0.0711405	0.14821	0.0695542
0.00960821	-1.36862	0.360646	0.998363	ALDH7A1P1	541	ENSG00000251400	5	77290268	77291800	aldehyde dehydrogenase 7 family member A1 pseudogene 1	0.887457	1.52307	0.560111		0.0412632	0.328543
-0.235047	-1.29048	1.00339	0.52213	ALDH8A1	64577	ENSG00000118514	6	134917393	134950115	aldehyde dehydrogenase 8 family member A1	1.23649	1.42094	0.384194		0.0660442	0.333159
-1.18018	-0.478208	0.788149	0.870238	ALDH9A1	223	ENSG00000143149	1	165662216	165698562	aldehyde dehydrogenase 9 family member A1	0.117436	0.0663319	0.0766554	0.158912	0.113195	0.0652567
0.811701	0.851865	-1.17218	-0.491385	ALDOA	226	ENSG00000149925	16	30064164	30070457	aldolase, fructose-bisphosphate A	-0.192526	0.100781	0.0560901	0.122955	-0.178108	0.0978632
1.37333	0.0497575	-0.489151	-0.933933	ALDOB	229	ENSG00000136872	9	101420560	101449664	aldolase, fructose-bisphosphate B	-0.739149	0.357723	0.0388042	0.0904327	-0.467374	0.356411
1.11479	0.511165	-1.108	-0.517961	ALDOC	230	ENSG00000109107	17	28573115	28576948	aldolase, fructose-bisphosphate C	-0.446792	0.160057	0.00524722	0.0161757	-0.393057	0.157973
-0.90488	-0.823224	0.792204	0.9359	ALG1	56052	ENSG00000033011	16	5033702	5087379	ALG1 chitobiosyldiphosphodolichol beta-mannosyltransferase	0.546113	0.112017	1.08664e-06	6.96568e-06	0.519693	0.112302
-0.884131	-0.836697	0.997577	0.723251	ALG10	84920	ENSG00000139133	12	34022468	34029694	ALG10 alpha-1,2-glucosyltransferase	0.222152	0.156388	0.155456	0.278818	0.1867	0.146544
1.21038	-0.811312	0.431786	-0.830852	ALG10B	144245	ENSG00000175548	12	38316762	38329721	ALG10 alpha-1,2-glucosyltransferase B	-0.171254	0.457091	0.707914	0.819614	-0.05965	0.272962
-0.345346	-1.19345	1.13849	0.400305	ALG11	440138	ENSG00000253710	13	52012391	52079232	ALG11 alpha-1,2-mannosyltransferase	0.254149	0.158493	0.108816	0.210457	0.213804	0.149446
0.697834	-1.24985	-0.355877	0.90789	ALG12	79087	ENSG00000182858	22	49900229	49918438	ALG12 alpha-1,6-mannosyltransferase	0.0101999	0.138449	0.941271	0.970373	0.00884384	0.127799
0.699777	0.821033	-0.177401	-1.34341	ALG13	79868	ENSG00000101901	X	111665811	111760649	ALG13 UDP-N-acetylglucosaminyltransferase subunit	-0.233069	0.107369	0.0299515	0.0727968	-0.214408	0.104491
0.137028	0.0795453	-1.32308	1.10651	ALG14	199857	ENSG00000172339	1	94974405	95072951	ALG14 UDP-N-acetylglucosaminyltransferase subunit	-0.0122043	0.173158	0.943811	0.971493	-0.0093902	0.153553
0.0618378	0.917452	0.425492	-1.40478	ALG1L	200810	ENSG00000189366	3	125928689	125990580	ALG1 like 1, pseudogene	-0.338276	0.451594	0.453815	0.612465	-0.123237	0.285726
-1.10219	0.386965	-0.472947	1.18817	ALG1L2	644974	ENSG00000251287	3	130081831	130113227	ALG1 chitobiosyldiphosphodolichol beta-mannosyltransferase like 2	0.646697	1.49261	0.664822		0.0306557	0.326713
0.661087	-0.855091	1.0491	-0.855091	ALG1L9P	285407	ENSG00000248671	11	71673885	71813859	ALG1 like 9, pseudogene	0.516991	2.45565	0.833253		0.00946924	0.329748
1.24283	0.377534	-0.804804	-0.815558	ALG2	85365	ENSG00000119523	9	99216425	99221942	ALG2 alpha-1,3/1,6-mannosyltransferase	-0.200042	0.097659	0.0405237	0.0937205	-0.185784	0.0950646
-0.794442	-0.934746	0.858939	0.870249	ALG3	10195	ENSG00000214160	3	184242301	184249548	ALG3 alpha-1,3- mannosyltransferase	0.463865	0.113219	4.18394e-05	0.000204561	0.436827	0.112931
-0.819891	-0.838821	0.476867	1.18184	ALG5	29880	ENSG00000120697	13	36949738	37000763	ALG5 dolichyl-phosphate beta-glucosyltransferase	0.120775	0.0990479	0.222707	0.367218	0.111508	0.0955191
-0.840233	0.00245091	-0.566772	1.40455	ALG6	29929	ENSG00000088035	1	63367575	63438553	ALG6 alpha-1,3-glucosyltransferase	0.075348	0.112751	0.50396	0.659077	0.0675226	0.107109
-1.26579	-0.318945	0.934403	0.650335	ALG8	79053	ENSG00000159063	11	78095244	78139660	ALG8 alpha-1,3-glucosyltransferase	0.363811	0.11192	0.00115149	0.00419736	0.338743	0.110738
-0.223981	-0.706471	1.46968	-0.53923	ALG9	79796	ENSG00000086848	11	111782195	111871581	ALG9 alpha-1,2-mannosyltransferase	0.0437147	0.153657	0.776031	0.866583	0.0362553	0.139714
-0.349261	-1.25389	0.699766	0.903385	ALKAL1	389658	ENSG00000196711	8	52534037	52565430	ALK and LTK ligand 1	0.613393	0.592225	0.300322	0.459315	0.160616	0.328694
-1.23852	0.167557	1.19294	-0.121981	ALKAL2	285016	ENSG00000189292	2	279558	288851	ALK and LTK ligand 2	0.553886	1.20822	0.646643		0.0391014	0.323926
-0.920615	-0.8018	0.975726	0.746689	ALKBH1	8846	ENSG00000100601	14	77672404	77708023	alkB homolog 1, histone H2A dioxygenase	0.436265	0.160092	0.00642851	0.0192719	0.383124	0.15791
-1.17874	-0.44294	0.587851	1.03383	ALKBH2	121642	ENSG00000189046	12	109088188	109093631	alkB homolog 2, alpha-ketoglutarate dependent dioxygenase	0.422366	0.128371	0.00100112	0.00369975	0.388083	0.127389
-0.139095	-1.27359	1.13107	0.28162	ALKBH3	221120	ENSG00000166199	11	43880811	43920274	alkB homolog 3, alpha-ketoglutarate dependent dioxygenase	0.0655352	0.13281	0.621693	0.755509	0.0567896	0.123683
-0.869343	-0.744751	0.367196	1.2469	ALKBH4	54784	ENSG00000160993	7	102456238	102464863	alkB homolog 4, lysine demethylase	0.329918	0.220663	0.134883	0.250395	0.24543	0.201576
-0.617128	-0.767239	-0.0400248	1.42439	ALKBH5	54890	ENSG00000091542	17	18183078	18209954	alkB homolog 5, RNA demethylase	0.251147	0.0944994	0.00786866	0.0229489	0.236014	0.092691
0.896491	0.820028	-1.01738	-0.699141	ALKBH6	84964	ENSG00000239382	19	36009120	36014239	alkB homolog 6	-0.825921	0.286945	0.00399796	0.0126939	-0.660333	0.29893
-0.176155	-1.34024	0.865392	0.651008	ALKBH7	84266	ENSG00000125652	19	6372794	6375250	alkB homolog 7	0.242261	0.19618	0.21687	0.359929	0.186601	0.177566
-0.852756	-0.849066	1.07872	0.623104	ALKBH8	91801	ENSG00000137760	11	107502727	107565742	alkB homolog 8, tRNA methyltransferase	0.327228	0.161782	0.0431096	0.0985499	0.278671	0.155395
-0.350538	-1.10531	1.27367	0.182182	ALMS1	7840	ENSG00000116127	2	73385758	73625166	ALMS1 centrosome and basal body associated protein	0.365199	0.107943	0.000716264	0.00273261	0.341809	0.106779
-0.743062	-0.773298	1.34987	0.166489	ALMS1-IT1	100874291	ENSG00000230002	2	73456764	73459482	ALMS1 intronic transcript 1	1.06936	0.690942	0.121699	0.230481	0.242257	0.40124
0.997542	0.721044	-0.795121	-0.923465	ALOX12	239	ENSG00000108839	17	6996049	7010754	arachidonate 12-lipoxygenase, 12S type	-0.911109	0.943313	0.334114	0.496423	-0.104993	0.335015
0.755957	-0.227628	-1.32179	0.793463	ALOX12-AS1	100506713	ENSG00000215067	17	6875232	7012530	ALOX12 antisense RNA 1	-0.143057	0.528042	0.786453	0.873232	-0.0406145	0.283431
0.616325	-1.49412	0.403721	0.474077	ALOX12B	242	ENSG00000179477	17	8072636	8087716	arachidonate 12-lipoxygenase, 12R type	0.372205	0.851578	0.662055	0.786159	0.0505613	0.314285
-0.941089	0.558112	1.12142	-0.738438	ALOX15	246	ENSG00000161905	17	4630919	4642294	arachidonate 15-lipoxygenase	0.474213	1.94452	0.80733		0.0132694	0.328315
1.04737	0.647246	-0.692047	-1.00257	ALOX15B	247	ENSG00000179593	17	8039034	8049134	arachidonate 15-lipoxygenase type B	-2.03359	0.659212	0.00203637	0.00699153	-1.51531	0.767002
1.03718	-1.34149	0.35008	-0.0457717	ALOX15P1		ENSG00000274114	17	6657034	6693577		-0.00081242	1.35368	0.999521		0.000175451	0.322815
0.917697	0.811042	-0.810633	-0.918105	ALOX5	240	ENSG00000012779	10	45374176	45446119	arachidonate 5-lipoxygenase	-1.70124	0.154501	3.37468e-28	1.45616e-26	-1.67459	0.155493
0.900449	0.829928	-0.82453	-0.905848	ALOXE3	59344	ENSG00000179148	17	8095900	8119047	arachidonate lipoxygenase 3	-2.37805	0.577835	3.86438e-05	0.000190191	-2.07404	0.612369
0.799983	0.428374	0.229058	-1.45741	ALOXE3P1		ENSG00000275011	17	8063936	8072533		-0.79378	1.79964	0.659158		-0.0260771	0.328553
1.08705	0.610488	-0.897751	-0.79979	ALPG	251	ENSG00000163286	2	232406844	232410714	alkaline phosphatase, germ cell	-0.875869	0.247841	0.00040932	0.00164626	-0.758732	0.256301
1.36583	-0.662461	-0.825127	0.12176	ALPI	248	ENSG00000163295	2	232456125	232460753	alkaline phosphatase, intestinal	-0.519013	1.9529	0.79042		-0.0147324	0.328273
0.910296	0.820453	-0.849987	-0.880761	ALPK1	80216	ENSG00000073331	4	112285509	112442621	alpha kinase 1	-0.898228	0.178941	5.17577e-07	3.49471e-06	-0.839978	0.182141
0.958814	0.767067	-0.901374	-0.824506	ALPK3	57538	ENSG00000136383	15	84817356	84873479	alpha kinase 3	-1.6312	0.158515	7.77311e-25	2.69071e-23	-1.60215	0.159529
0.87096	0.861073	-0.868452	-0.863581	ALPP	250	ENSG00000163283	2	232378724	232382889	alkaline phosphatase, placental	-1.29579	0.145643	5.73596e-19	1.35789e-17	-1.26615	0.146873
1.02042	0.695734	-0.825636	-0.890518	ALS2	57679	ENSG00000003393	2	201700267	201782112	alsin Rho guanine nucleotide exchange factor ALS2	-0.289014	0.069113	2.89253e-05	0.000146005	-0.280004	0.068583
0.905008	0.822111	-0.78103	-0.94609	ALS2CL	259173	ENSG00000178038	3	46668995	46693704	ALS2 C-terminal like	-1.84877	0.101959	1.76802e-73	3.82507e-71	-1.83804	0.10225
-1.11205	-0.271248	0.08626	1.29704	ALX1	8092	ENSG00000180318	12	85280220	85301784	ALX homeobox 1	0.294299	0.205068	0.151252	0.273015	0.224983	0.187719
-0.801583	-0.91588	0.710763	1.0067	ALYREF	10189	ENSG00000183684	17	81887835	81891586	Aly/REF export factor	0.735875	0.0853745	6.73244e-18	1.48333e-16	0.721786	0.0856781
-1.40276	0.553039	0.852293	-0.00257111	AMACR	23600	ENSG00000242110	5	33986165	34008104	alpha-methylacyl-CoA racemase	0.111583	0.269675	0.679043	0.799022	0.0680767	0.212217
-0.433381	-1.20943	0.825874	0.816938	AMBP	259	ENSG00000106927	9	114060127	114078328	alpha-1-microglobulin/bikunin precursor	1.87181	0.437155	1.85383e-05	9.64176e-05	1.66408	0.457816
0.81018	0.791176	-0.334052	-1.2673	AMBRA1	55626	ENSG00000110497	11	46396414	46594125	autophagy and beclin 1 regulator 1	-0.107825	0.100233	0.282044	0.438507	-0.0990968	0.0964766
-0.886009	-0.84385	0.807052	0.922807	AMD1	262	ENSG00000123505	6	110874770	110898879	adenosylmethionine decarboxylase 1	0.663135	0.0558553	1.64718e-32	9.23337e-31	0.656778	0.0559416
-1.00822	1.04889	-0.684593	0.643926	AMDHD1	144193	ENSG00000139344	12	95943331	95968720	amidohydrolase domain containing 1	0.00547729	0.326587	0.986619	0.992439	0.0031535	0.233112
-1.3285	-0.167523	0.538264	0.957758	AMDHD2	51005	ENSG00000162066	16	2520357	2531422	amidohydrolase domain containing 2	0.293795	0.264591	0.266837	0.420836	0.190511	0.224552
-0.058612	-1.30698	0.26094	1.10466	AMELX	265	ENSG00000125363	X	11293413	11300761	amelogenin X-linked	2.11007	2.59851	0.416773		0.0347318	0.332845
-0.721127	-0.999642	0.869514	0.851256	AMER1	139285	ENSG00000184675	X	64185117	64205708	APC membrane recruitment protein 1	0.984415	0.162762	1.46469e-09	1.41272e-08	0.939627	0.164925
0.276308	1.21044	-1.16366	-0.32309	AMFR	267	ENSG00000159461	16	56361452	56425545	autocrine motility factor receptor	-0.138314	0.0809132	0.0873738	0.176687	-0.13104	0.0790864
-0.480164	1.28271	0.231987	-1.03454	AMH	268	ENSG00000104899	19	2249309	2252073	anti-Mullerian hormone	-0.13294	0.336882	0.693125	0.809356	-0.0657236	0.240354
0.954073	-0.881643	-0.845482	0.773053	AMIGO1	57463	ENSG00000181754	1	109504178	109509738	adhesion molecule with Ig like domain 1	-0.0057182	0.157379	0.971016	0.984542	-0.00447592	0.142185
0.912423	0.818282	-0.876017	-0.854688	AMIGO2	347902	ENSG00000139211	12	47075707	47079959	adhesion molecule with Ig like domain 2	-1.6723	0.0949699	2.11017e-69	4.16078e-67	-1.66217	0.0951755
-0.336721	-1.26081	0.901038	0.696494	AMMECR1	9949	ENSG00000101935	X	110194186	110440318	AMMECR nuclear protein 1	0.0694613	0.0961972	0.47025	0.628547	0.064266	0.0925895
0.308825	1.0697	-0.0527884	-1.32574	AMMECR1L	83607	ENSG00000144233	2	127861630	127885967	AMMECR1 like	-0.0655949	0.0826151	0.427206	0.58858	-0.0617689	0.080313
0.266053	1.0962	-1.31346	-0.0487986	AMN	81693	ENSG00000166126	14	102922663	102933596	amnion associated transmembrane protein	-0.278514	0.26015	0.284353	0.441348	-0.181473	0.220284
-0.846827	-0.878533	0.756308	0.969052	AMN1	196394	ENSG00000151743	12	31671142	31729121	antagonist of mitotic exit network 1 homolog	0.243863	0.155525	0.116881	0.222929	0.206306	0.14667
1.1679	0.497307	-0.866124	-0.79908	AMOT	154796	ENSG00000126016	X	112774503	112840831	angiomotin	-0.15637	0.115027	0.174014	0.304153	-0.140751	0.110057
0.392515	1.21768	-0.987887	-0.622308	AMOTL1	154810	ENSG00000166025	11	94706431	94876748	angiomotin like 1	-0.464736	0.209838	0.0267777	0.0662299	-0.373147	0.204306
0.758937	0.955189	-1.00287	-0.71126	AMOTL2	51421	ENSG00000114019	3	134355347	134375479	angiomotin like 2	-0.790535	0.0732705	3.86863e-27	1.59422e-25	-0.780374	0.0734875
-0.690344	-0.0492209	-0.690294	1.42986	AMPD2	271	ENSG00000116337	1	109616104	109632051	adenosine monophosphate deaminase 2	0.0405215	0.0820139	0.621248	0.755263	0.0382886	0.0796684
0.919565	0.810776	-0.866211	-0.86413	AMPD3	272	ENSG00000133805	11	10308313	10507579	adenosine monophosphate deaminase 3	-0.741382	0.14986	7.53014e-07	4.94299e-06	-0.696468	0.151598
-0.51989	-1.02695	1.26267	0.284175	AMT	275	ENSG00000145020	3	49416778	49422685	aminomethyltransferase	0.585532	1.98087	0.767541		0.0161585	0.328567
0.671783	1.02142	-1.03627	-0.656933	AMY2B	280	ENSG00000240038	1	103553815	103579534	amylase alpha 2B	-0.90798	0.536488	0.0905596	0.181832	-0.331353	0.42625
-1.48048	0.331367	0.436474	0.712641	AMZ2	51321	ENSG00000196704	17	68205481	68257712	archaelysin family metallopeptidase 2	0.0786674	0.0778982	0.312555	0.473284	0.0747361	0.0760164
-1.03246	0.835396	-0.68144	0.878507	AMZ2P1	201283	ENSG00000214174	17	64966550	64975617	AMZ2 pseudogene 1	0.0444154	0.216069	0.837134	0.90789	0.0315225	0.181651
-0.892863	-0.832516	0.96576	0.759619	ANAPC1	64682	ENSG00000153107	2	111611639	111884690	anaphase promoting complex subunit 1	0.485087	0.0732533	3.54255e-11	4.11808e-10	0.473678	0.0732681
-0.371045	-1.2232	1.01542	0.578822	ANAPC10	10393	ENSG00000164162	4	144831908	145098541	anaphase promoting complex subunit 10	0.25664	0.195089	0.188341	0.323675	0.198967	0.177764
-1.10724	-0.162239	-0.0515149	1.321	ANAPC11	51529	ENSG00000141552	17	81890790	81900991	anaphase promoting complex subunit 11	0.102001	0.105675	0.334426	0.496559	0.0930674	0.101236
-0.687452	-1.00785	1.04081	0.654488	ANAPC13	25847	ENSG00000129055	3	134477706	134486716	anaphase promoting complex subunit 13	0.165741	0.0792991	0.0366117	0.086161	0.157751	0.0777253
-1.05196	-0.623419	0.612667	1.06271	ANAPC15	25906	ENSG00000110200	11	72106378	72112780	anaphase promoting complex subunit 15	0.247571	0.152627	0.104789	0.204268	0.210844	0.144456
0.455624	1.19441	-0.872277	-0.777762	ANAPC16	119504	ENSG00000166295	10	72216000	72235860	anaphase promoting complex subunit 16	-0.271917	0.0692164	8.54771e-05	0.000395097	-0.263196	0.068645
-0.52653	-0.713851	1.46987	-0.229489	ANAPC1P1	100286979	ENSG00000233673	2	86861825	86912978	ANAPC1 pseudogene 1	1.21215	1.78104	0.496134		0.041043	0.330696
0.72368	0.811673	-0.202514	-1.33284	ANAPC1P2	285074	ENSG00000285793	2	87030675	87076429	ANAPC1 pseudogene 2	-0.544333	0.446549	0.222853	0.367342	-0.218552	0.319479
1.0269	0.329127	-1.35542	-0.000606537	ANAPC2	29882	ENSG00000176248	9	137174784	137188560	anaphase promoting complex subunit 2	-0.21409	0.120327	0.0752004	0.156416	-0.192259	0.11569
-0.815737	-0.903733	0.719107	1.00036	ANAPC4	29945	ENSG00000053900	4	25377263	25418498	anaphase promoting complex subunit 4	0.24014	0.0972329	0.013521	0.0369309	0.2246	0.0951605
-1.0055	-0.705581	0.738898	0.972187	ANAPC5	51433	ENSG00000089053	12	121308245	121399896	anaphase promoting complex subunit 5	0.384404	0.0576421	2.57883e-11	3.06879e-10	0.37758	0.0575349
-0.900691	-0.824668	0.762061	0.963298	ANAPC7	51434	ENSG00000196510	12	110372900	110403730	anaphase promoting complex subunit 7	0.617989	0.0784605	3.36866e-15	5.9765e-14	0.605415	0.0786657
0.902494	0.828601	-0.848504	-0.882591	ANG	283	ENSG00000214274	14	20684177	20698971	angiogenin	-0.520578	0.23747	0.0283664	0.0695416	-0.402125	0.232093
-0.942138	-0.785391	0.822779	0.904749	ANGEL1	23357	ENSG00000013523	14	76786009	76826246	angel homolog 1	0.197708	0.107711	0.0664245	0.141024	0.181268	0.104245
0.568838	1.11644	-0.912986	-0.772294	ANGEL2	90806	ENSG00000174606	1	212992182	213015867	angel homolog 2	-0.303014	0.0969851	0.00178207	0.00619903	-0.284627	0.0956342
1.03924	0.638615	-1.06757	-0.610287	ANGPTL4	51129	ENSG00000167772	19	8363289	8374370	angiopoietin like 4	-1.83122	0.437229	2.8113e-05	0.000142273	-1.61427	0.460659
0.793233	0.117216	0.530317	-1.44077	ANGPTL6	83854	ENSG00000130812	19	10092338	10102678	angiopoietin like 6	-0.159887	0.895032	0.858222	0.921649	-0.0191099	0.312421
-0.167599	-1.14259	1.29075	0.0194357	ANK1	286	ENSG00000029534	8	41653220	41896762	ankyrin 1	0.139291	0.384489	0.717145	0.825767	0.0605727	0.255067
0.903141	0.779721	-0.55827	-1.12459	ANK2	287	ENSG00000145362	4	112818032	113384221	ankyrin 2	-2.45173	0.566478	1.50456e-05	7.98789e-05	-2.16867	0.598769
0.833558	0.896075	-0.808178	-0.921455	ANK3	288	ENSG00000151150	10	60026298	60733490	ankyrin 3	-0.420377	0.109265	0.000119419	0.00053577	-0.395205	0.108676
1.16328	-1.25285	0.236014	-0.146449	ANKAR	150709	ENSG00000151687	2	189674290	189761193	ankyrin and armadillo repeat containing	-0.0039745	0.314675	0.989923	0.994519	-0.00177284	0.22843
-0.809179	1.17653	-0.85208	0.484726	ANKDD1A	348094	ENSG00000166839	15	64911902	64958691	ankyrin repeat and death domain containing 1A	-0.0329304	0.686686	0.961752	0.979996	-0.00589303	0.299401
0.761732	0.939762	-1.06178	-0.639709	ANKDD1B	728780	ENSG00000189045	5	75611182	75681773	ankyrin repeat and death domain containing 1B	-1.8348	1.08064	0.0895306		-0.182099	0.387667
-0.348971	-1.00417	1.36735	-0.0142124	ANKEF1	63926	ENSG00000132623	20	9986126	10058303	ankyrin repeat and EF-hand domain containing 1	0.140759	0.12602	0.264012	0.417515	0.124256	0.119248
1.03419	0.660106	-1.01947	-0.674821	ANKFN1	162282	ENSG00000153930	17	55882301	56517016	ankyrin repeat and fibronectin type III domain containing 1	-1.75146	0.442193	7.46857e-05	0.000349153	-1.51775	0.46971
-0.641605	-0.948562	1.25566	0.334509	ANKFY1	51479	ENSG00000185722	17	4163821	4263995	ankyrin repeat and FYVE domain containing 1	0.0663217	0.069175	0.337684	0.499629	0.0637651	0.0678004
-0.991084	-0.0428142	-0.343704	1.3776	ANKH	56172	ENSG00000154122	5	14704800	14871778	ANKH inorganic pyrophosphate transport regulator	0.0342381	0.0573925	0.550801	0.699765	0.0333033	0.0565684
0.319582	0.780831	0.36705	-1.46746	ANKHD1	54882	ENSG00000131503	5	140401814	140539856	ankyrin repeat and KH domain containing 1	-0.289285	0.304876	0.342692	0.505311	-0.164896	0.242424
0.771447	-0.171672	-1.34763	0.747856	ANKHD1-DT		ENSG00000249637	5	140370891	140401460		-0.164771	0.676293	0.807511	0.887692	-0.0319803	0.299938
0.644483	-1.45043	0.682366	0.12358	ANKHD1-EIF4EBP3	404734	ENSG00000254996	5	140401908	140549569	ANKHD1-EIF4EBP3 readthrough	0.160208	0.403706	0.691483	0.808348	0.0660771	0.260968
0.682	0.356231	0.447584	-1.48581	ANKIB1	54467	ENSG00000001629	7	92245974	92401383	ankyrin repeat and IBR domain containing 1	-0.0785847	0.0789058	0.319284	0.480484	-0.0741939	0.0769337
1.21507	0.242226	-0.279706	-1.17759	ANKLE1	126549	ENSG00000160117	19	17281645	17287646	ankyrin repeat and LEM domain containing 1	-0.358573	0.696009	0.606424	0.744786	-0.0674752	0.307625
1.01636	0.645024	-1.12298	-0.538406	ANKLE2	23141	ENSG00000176915	12	132725503	132761832	ankyrin repeat and LEM domain containing 2	-0.179096	0.0635442	0.00482562	0.0150157	-0.173533	0.0627651
0.419098	0.927578	0.053706	-1.40038	ANKMY1	51281	ENSG00000144504	2	240479422	240569209	ankyrin repeat and MYND domain containing 1	-0.0556027	0.118592	0.639172	0.769903	-0.0492226	0.111925
-0.876008	-0.641894	1.33712	0.180778	ANKMY2	57037	ENSG00000106524	7	16599779	16645817	ankyrin repeat and MYND domain containing 2	0.241623	0.0965861	0.012362	0.0342153	0.226149	0.0946215
0.789801	0.938721	-0.887946	-0.840576	ANKRA2	57763	ENSG00000164331	5	73552190	73565667	ankyrin repeat family A member 2	-0.511719	0.106471	1.53839e-06	9.64716e-06	-0.487502	0.106567
0.628534	1.0555	-1.0329	-0.651141	ANKRD1	27063	ENSG00000148677	10	90912096	90921087	ankyrin repeat domain 1	-1.83762	0.25988	1.5382e-12	2.11479e-11	-1.76593	0.264002
1.21118	-0.998494	0.40033	-0.613016	ANKRD10	55608	ENSG00000088448	13	110878540	110915069	ankyrin repeat domain 10	-0.0193503	0.0841001	0.818024	0.894892	-0.0181096	0.0815146
1.08999	0.189486	-1.33165	0.0521807	ANKRD10-IT1		ENSG00000229152	13	110894639	110899172		-0.29233	0.294851	0.321466	0.482648	-0.172565	0.238228
1.09921	0.585367	-0.965121	-0.719458	ANKRD11	29123	ENSG00000167522	16	89267630	89490561	ankyrin repeat domain containing 11	-0.472105	0.0684059	5.14455e-12	6.60648e-11	-0.462062	0.0683605
-0.659916	0.56213	1.10808	-1.01029	ANKRD11P2		ENSG00000231686	X	146619597	146620584		0.118277	1.50733	0.937456		0.005607	0.324918
1.08941	-0.758609	0.603688	-0.934486	ANKRD12	23253	ENSG00000101745	18	9136228	9285985	ankyrin repeat domain 12	-0.0261316	0.0878836	0.766204	0.859511	-0.0243288	0.0849677
0.991982	0.73014	-0.863751	-0.858371	ANKRD13A	88455	ENSG00000076513	12	109999186	110039763	ankyrin repeat domain 13A	-0.332003	0.0941125	0.000419152	0.00168146	-0.314497	0.0931119
-0.888897	-0.537175	0.0405551	1.38552	ANKRD13B	124930	ENSG00000198720	17	29589769	29614761	ankyrin repeat domain 13B	0.475379	0.220962	0.0314445	0.075787	0.374651	0.214547
1.03291	0.66189	-1.01892	-0.675879	ANKRD13C	81573	ENSG00000118454	1	70258999	70354734	ankyrin repeat domain 13C	-0.399465	0.0851039	2.68106e-06	1.61621e-05	-0.384292	0.0847333
0.161529	0.297227	0.949676	-1.40843	ANKRD13D	338692	ENSG00000172932	11	67289300	67302485	ankyrin repeat domain 13D	-0.0468772	0.122778	0.702607	0.815781	-0.0410731	0.115384
-1.1281	-0.469287	0.458594	1.13879	ANKRD16	54522	ENSG00000134461	10	5861616	5889906	ankyrin repeat domain 16	0.479889	0.21773	0.0275202	0.0678079	0.381597	0.212275
-0.0562549	-1.19434	1.25315	-0.00254796	ANKRD17	26057	ENSG00000132466	4	73073376	73258798	ankyrin repeat domain 17	0.170566	0.0749419	0.0228478	0.0578604	0.163304	0.0736345
0.166413	-1.41948	0.333007	0.920055	ANKRD17-DT		ENSG00000250220	4	73259209	73317953		0.51394	1.78699	0.773652		0.0174857	0.327592
-0.822202	-0.90871	0.855341	0.87557	ANKRD18A	253650	ENSG00000180071	9	38571358	38620596	ankyrin repeat domain 18A	0.515393	0.247619	0.0373973	0.0876657	0.387962	0.240131
-0.115121	-1.33917	0.466487	0.987805	ANKRD18B	441459	ENSG00000230453	9	33524251	33573013	ankyrin repeat domain 18B	0.361593	0.507264	0.47595	0.633286	0.113804	0.29499
-0.699494	-0.953653	1.16921	0.483934	ANKRD19P	138649	ENSG00000187984	9	92809568	92838457	ankyrin repeat domain 19, pseudogene	0.618449	0.402213	0.124143	0.234226	0.305319	0.337788
0.538694	0.767907	0.142477	-1.44908	ANKRD20A1	84210	ENSG00000260691	9	67832765	67920552	ankyrin repeat domain 20 family member A1	-0.267995	1.41652	0.849942		-0.0138034	0.324175
-0.604111	-1.08902	0.93531	0.757818	ANKRD20A11P	391267	ENSG00000215559	21	13909574	13980437	ankyrin repeat domain 20 family member A11, pseudogene	1.20005	0.579739	0.0384539	0.0897508	0.49201	0.599808
-0.879264	0.030725	1.39017	-0.541635	ANKRD20A21P		ENSG00000277112	20	30656033	30723932		0.711959	2.29021	0.755899		0.0145418	0.329649
0.717782	-1.45731	0.579047	0.160476	ANKRD20A4P		ENSG00000172014	9	64369394	64413142		0.406061	1.44178	0.778221		0.0211914	0.324871
0.996661	0.273393	-1.38516	0.115109	ANKRD20A5P		ENSG00000186481	18	14179097	14252140		-0.115553	0.204799	0.572601	0.717859	-0.0842837	0.176532
1.07181	0.63197	-0.866189	-0.83759	ANKRD22	118932	ENSG00000152766	10	88819896	88851844	ankyrin repeat domain 22	-0.226143	0.0649438	0.000497432	0.00195966	-0.219205	0.064288
0.811765	0.882344	-0.594563	-1.09955	ANKRD23	200539	ENSG00000163126	2	96824526	96857934	ankyrin repeat domain 23	-1.34709	0.700255	0.054391	0.11982	-0.349111	0.519092
-0.415646	-0.404684	1.48882	-0.668491	ANKRD24	170961	ENSG00000089847	19	4182689	4224814	ankyrin repeat domain 24	0.313936	0.849509	0.711718	0.822126	0.0422165	0.313042
-1.1505	-0.429996	0.442062	1.13843	ANKRD26	22852	ENSG00000107890	10	26973793	27100494	ankyrin repeat domain containing 26	0.134817	0.141973	0.342315	0.504947	0.115297	0.132268
-1.24264	-0.354006	0.965471	0.631177	ANKRD27	84079	ENSG00000105186	19	32597006	32676597	ankyrin repeat domain 27	0.243443	0.09547	0.0107742	0.0302832	0.22827	0.0936155
-0.9193	-0.754053	1.14183	0.531523	ANKRD28	23243	ENSG00000206560	3	15667236	15859771	ankyrin repeat domain 28	0.407465	0.078497	2.09358e-07	1.50146e-06	0.394627	0.0782997
0.892272	0.808812	-1.07729	-0.62379	ANKRD29	147463	ENSG00000154065	18	23598926	23662911	ankyrin repeat domain 29	-0.746542	0.353519	0.0347082	0.0823909	-0.480886	0.355129
-0.741696	0.652931	-0.960512	1.04928	ANKRD31	256006	ENSG00000145700	5	75068275	75236911	ankyrin repeat domain 31	0.0672681	0.739668	0.927537	0.963189	0.011671	0.303588
0.878557	0.828876	-0.649466	-1.05797	ANKRD33B	651746	ENSG00000164236	5	10564070	10657816	ankyrin repeat domain 33B	-3.06762	0.507624	1.51187e-09	1.45642e-08	-2.89359	0.518814
-0.339319	0.606715	-1.24748	0.980082	ANKRD34A	284615	ENSG00000272031	1	145959441	145964575	ankyrin repeat domain 34A	-0.0345409	0.41785	0.934119	0.966636	-0.0130193	0.260374
-0.302112	1.45028	-0.303635	-0.844529	ANKRD34B	340120	ENSG00000189127	5	80556755	80570280	ankyrin repeat domain 34B	-0.380859	0.317718	0.230632	0.376776	-0.216391	0.260732
0.29106	0.244929	-1.43239	0.896404	ANKRD35	148741	ENSG00000198483	1	145866560	145885866	ankyrin repeat domain 35	-0.202252	1.23062	0.869456		-0.0136196	0.321358
0.0375404	-1.35669	1.03898	0.280173	ANKRD36	375248	ENSG00000135976	2	97113153	97264521	ankyrin repeat domain 36	0.488397	0.293491	0.0960934	0.190681	0.319675	0.267917
-1.19989	-0.442909	0.735649	0.907149	ANKRD36B	57730	ENSG00000196912	2	97492663	97589877	ankyrin repeat domain 36B	0.20382	0.293043	0.486723	0.643388	0.117945	0.228614
0.182802	-1.46111	0.55336	0.724944	ANKRD36C	400986	ENSG00000174501	2	95836919	95991831	ankyrin repeat domain 36C	0.447303	0.355934	0.208861	0.350926	0.234308	0.285145
0.958628	0.763908	-0.944669	-0.777867	ANKRD37	353322	ENSG00000186352	4	185396021	185400628	ankyrin repeat domain 37	-1.47586	0.282175	1.69229e-07	1.22722e-06	-1.37197	0.290142
-0.456223	-0.926716	-0.00738608	1.39032	ANKRD39	51239	ENSG00000213337	2	96836611	96858016	ankyrin repeat domain 39	0.166531	0.19149	0.384486	0.548255	0.12751	0.170072
-1.12517	-0.529335	0.620994	1.03351	ANKRD40	91369	ENSG00000154945	17	50693198	50707914	ankyrin repeat domain 40	0.173812	0.0737676	0.0184624	0.0482701	0.166672	0.0725582
0.858367	0.870913	-0.933602	-0.795678	ANKRD40CL	55018	ENSG00000167117	17	50761029	50767557	ANKRD40 C-terminal like	-0.644496	0.156472	3.80633e-05	0.000187452	-0.593623	0.15795
1.28847	-0.030993	-0.105159	-1.15232	ANKRD42	338699	ENSG00000137494	11	83193712	83260694	ankyrin repeat domain 42	-0.259737	0.168324	0.122811	0.232164	-0.214067	0.157606
-1.03304	0.837601	-0.680785	0.876228	ANKRD42-DT	100506282	ENSG00000247137	11	83184491	83193794	ANKRD42 divergent transcript	0.151175	1.22652	0.901904		0.0104912	0.321274
-1.02657	0.622981	1.06104	-0.657447	ANKRD44	91526	ENSG00000065413	2	196967017	197311173	ankyrin repeat domain 44	0.114167	0.363811	0.753668	0.850469	0.052563	0.248292
-0.674385	-0.795064	1.38026	0.0891876	ANKRD46	157567	ENSG00000186106	8	100509752	100559784	ankyrin repeat domain 46	0.173209	0.12026	0.149786	0.270957	0.155059	0.114956
0.627597	0.801513	-1.40104	-0.0280699	ANKRD49	54851	ENSG00000168876	11	94493979	94499578	ankyrin repeat domain 49	-0.340319	0.144955	0.0188867	0.0491494	-0.299609	0.140901
0.122311	1.18463	-0.050284	-1.25665	ANKRD49P1		ENSG00000228446	2	224499387	224500100		-1.12	1.22191	0.359354		-0.0781185	0.333745
0.806033	0.924008	-0.86502	-0.86502	ANKRD49P2	116435289	ENSG00000225349	12	31534715	31535247	ANKRD49 pseudogene 2	-3.63881	2.68506	0.175351		-0.049169	0.33663
-0.318015	-1.0206	1.36259	-0.0239733	ANKRD50	57182	ENSG00000151458	4	124664048	124712732	ankyrin repeat domain containing 50	0.142144	0.0974853	0.14481	0.264073	0.131653	0.0943205
-0.225961	-1.19522	1.21582	0.205361	ANKRD52	283373	ENSG00000139645	12	56237807	56258384	ankyrin repeat domain 52	0.0998236	0.0668808	0.135553	0.25125	0.0961319	0.0657091
0.359545	0.610426	0.521912	-1.49188	ANKRD53	79998	ENSG00000144031	2	70978380	70985499	ankyrin repeat domain 53	-1.00582	1.78485	0.573071		-0.0331353	0.329498
-0.66826	-1.0315	0.999632	0.700126	ANKRD54	129138	ENSG00000100124	22	37830855	37849327	ankyrin repeat domain 54	0.182684	0.141504	0.1967	0.33457	0.157304	0.133096
0.83218	0.88796	-0.719424	-1.00072	ANKRD6	22881	ENSG00000135299	6	89433152	89633834	ankyrin repeat domain 6	-1.02515	0.396297	0.00968668	0.0275849	-0.718748	0.434351
-0.982542	-0.639365	1.20499	0.416914	ANKRD61	100310846	ENSG00000157999	7	6031376	6036552	ankyrin repeat domain 61	0.814344	1.04622	0.436353		0.076384	0.328681
-0.196324	-1.05378	-0.10625	1.35636	ANKRD63	100131244	ENSG00000230778	15	40278372	40283064	ankyrin repeat domain 63	0.965021	1.65745	0.560409		0.0380418	0.329208
0.522738	0.184602	-1.45877	0.751433	ANKRD65	441869	ENSG00000235098	1	1418420	1421769	ankyrin repeat domain 65	-0.406572	1.71565	0.812674		-0.0148055	0.326885
-0.0586075	-0.488908	-0.868093	1.41561	ANKRD9	122416	ENSG00000156381	14	102501767	102509799	ankyrin repeat domain 9	0.0277647	0.117794	0.813661	0.89206	0.024804	0.111055
-0.638479	-0.960978	1.24117	0.35829	ANKS1A	23294	ENSG00000064999	6	34889255	35091406	ankyrin repeat and sterile alpha motif domain containing 1A	0.168813	0.0887463	0.0571455	0.124706	0.158753	0.0865731
-1.05634	-0.562854	0.451511	1.16768	ANKS3	124401	ENSG00000168096	16	4696510	4734378	ankyrin repeat and sterile alpha motif domain containing 3	0.266854	0.212779	0.209792	0.351806	0.199216	0.190997
-0.694431	-1.00587	1.02406	0.676242	ANKS4B	257629	ENSG00000175311	16	21233699	21253850	ankyrin repeat and sterile alpha motif domain containing 4B	0.106798	0.0948564	0.260211	0.41306	0.0991339	0.0916426
-0.906771	-0.822873	0.913876	0.815767	ANKS6	203286	ENSG00000165138	9	98731329	98796965	ankyrin repeat and sterile alpha motif domain containing 6	0.320862	0.0655137	9.70022e-07	6.26972e-06	0.312514	0.0651793
0.892256	0.837079	-0.927433	-0.801902	ANKZF1	55139	ENSG00000163516	2	219229783	219236679	ankyrin repeat and zinc finger peptidyl tRNA hydrolase 1	-0.814785	0.0941511	4.97158e-18	1.10632e-16	-0.798178	0.0945948
-0.976743	-0.746968	0.827041	0.896669	ANLN	54443	ENSG00000011426	7	36389821	36453791	anillin, actin binding protein	0.347538	0.0536735	9.47827e-11	1.04935e-09	0.341741	0.0535375
0.898611	0.832405	-0.891914	-0.839101	ANO1	55107	ENSG00000131620	11	69985907	70189530	anoctamin 1	-0.658665	0.0715987	3.5995e-20	9.23713e-19	-0.648151	0.0717649
-1.41947	0.500661	0.0642231	0.854586	ANO10	55129	ENSG00000160746	3	43354859	43691594	anoctamin 10	0.0912059	0.105733	0.388352	0.551885	0.0830202	0.101229
0.621697	1.07979	-0.850746	-0.850746	ANO4	121601	ENSG00000151572	12	100717526	101128641	anoctamin 4	-3.96833	2.48222	0.109887		-0.0619565	0.339466
0.856774	0.843833	-0.618083	-1.08252	ANO6	196527	ENSG00000177119	12	45215987	45482280	anoctamin 6	-0.142192	0.0590485	0.0160374	0.0427252	-0.138438	0.0583443
-0.706204	-1.0091	0.78071	0.934599	ANO7	50636	ENSG00000146205	2	241188509	241225976	anoctamin 7	1.1538	0.409156	0.00480325	0.014958	0.855944	0.452389
0.864924	0.846464	-1.04408	-0.667305	ANO7L1		ENSG00000237276	1	16215907	16228027		-0.687433	0.795751	0.387654	0.551158	-0.10643	0.327258
0.787123	0.895821	-1.12589	-0.55705	ANO8	57719	ENSG00000074855	19	17323223	17334855	anoctamin 8	-0.632939	0.160515	8.04107e-05	0.000373898	-0.579198	0.161947
0.907546	0.818844	-0.774756	-0.951634	ANO9	338440	ENSG00000185101	11	417933	442011	anoctamin 9	-0.775925	0.149433	2.07545e-07	1.48983e-06	-0.73257	0.151263
-1.38866	0.392929	0.0387909	0.956939	ANOS2P		ENSG00000241859	Y	13703902	13915824		0.170176	0.314116	0.587982	0.73079	0.0917423	0.234515
-0.99227	-0.604441	0.365165	1.23155	ANP32A	8125	ENSG00000140350	15	68778535	68820897	acidic nuclear phosphoprotein 32 family member A	0.284329	0.0688272	3.61108e-05	0.000178871	0.275612	0.0682989
0.562043	0.0776731	-1.43194	0.792224	ANP32AP1	723972	ENSG00000259516	15	35181799	35238197	acidic nuclear phosphoprotein 32 family member A pseudogene 1	-0.313327	2.19093	0.886282		-0.00711426	0.328847
-0.854308	-0.270044	-0.322456	1.44681	ANP32B	10541	ENSG00000136938	9	97983341	98015943	acidic nuclear phosphoprotein 32 family member B	0.149213	0.0718894	0.0379322	0.0886926	0.143164	0.0706434
0.118496	-1.43955	0.517219	0.803832	ANP32BP1	646791	ENSG00000259790	15	75321397	75322693	acidic nuclear phosphoprotein 32 family member B pseudogene 1	1.71146	1.77737	0.335589		0.0600389	0.334912
-0.91157	-0.815755	0.786986	0.940339	ANP32E	81611	ENSG00000143401	1	150218417	150236156	acidic nuclear phosphoprotein 32 family member E	0.410319	0.0657836	4.44902e-10	4.56237e-09	0.401298	0.0656685
1.0514	0.635314	-0.658392	-1.02832	ANPEP	290	ENSG00000166825	15	89784895	89815401	alanyl aminopeptidase, membrane	-2.27998	0.915453	0.0127546	0.0351706	-0.591897	1.53348
-1.19959	-0.294916	0.324619	1.16989	ANTKMT	65990	ENSG00000103254	16	720581	722590	adenine nucleotide translocase lysine methyltransferase	0.455479	0.273493	0.09583	0.190231	0.309737	0.251317
0.013151	1.38691	-0.480686	-0.919374	ANTXR1	84168	ENSG00000169604	2	69013176	69249327	ANTXR cell adhesion molecule 1	-0.928443	2.14174	0.664651		-0.0216986	0.329722
1.13289	0.538988	-0.716667	-0.955214	ANTXR2	118429	ENSG00000163297	4	79901146	80125454	ANTXR cell adhesion molecule 2	-0.368691	0.063415	6.10211e-09	5.36112e-08	-0.361982	0.0632227
0.695949	1.01858	-0.921795	-0.792738	ANXA1	301	ENSG00000135046	9	73151865	73170393	annexin A1	-0.75628	0.0607515	1.42059e-35	9.37647e-34	-0.749096	0.060882
1.30081	-1.08473	0.124243	-0.340324	ANXA10	11199	ENSG00000109511	4	168092537	168187736	annexin A10	-0.0264817	0.0918386	0.773079	0.864498	-0.0245023	0.0884992
0.884708	0.802232	-1.11809	-0.568853	ANXA11	311	ENSG00000122359	10	80150889	80205572	annexin A11	-0.458914	0.0612456	6.73146e-14	1.04856e-12	-0.450867	0.0612137
0.851504	0.865872	-1.01762	-0.699757	ANXA13	312	ENSG00000104537	8	123680794	123737402	annexin A13	-0.871168	0.108317	8.78298e-16	1.64044e-14	-0.849936	0.10898
0.730073	0.985678	-0.96634	-0.749412	ANXA2	302	ENSG00000182718	15	60347134	60402883	annexin A2	-0.298957	0.0469346	1.89451e-10	2.02824e-09	-0.29469	0.0467915
1.2908	-0.925311	0.270485	-0.635976	ANXA2P1		ENSG00000213406	4	153307792	153308717		-0.192858	1.44862	0.894088		-0.0095286	0.324274
0.377459	1.085	-1.28391	-0.178552	ANXA2P2		ENSG00000231991	9	33624274	33625293		-0.246374	0.116316	0.0341623	0.0813431	-0.223908	0.112824
0.355898	0.909111	0.157029	-1.42204	ANXA2P3		ENSG00000216740	10	64825572	64826579		-1.88038	2.52281	0.45606		-0.0312636	0.33201
0.138063	1.35985	-0.678717	-0.819198	ANXA2R	389289	ENSG00000177721	5	43039233	43043170	annexin A2 receptor	-0.368845	0.565688	0.514382	0.66788	-0.0971616	0.300459
0.769707	0.956272	-0.905385	-0.820594	ANXA3	306	ENSG00000138772	4	78551747	78610451	annexin A3	-0.822776	0.0567099	1.07034e-47	1.15782e-45	-0.816769	0.056817
0.935839	0.780938	-1.001	-0.715773	ANXA4	307	ENSG00000196975	2	69644425	69827112	annexin A4	-0.487094	0.0541464	2.34352e-19	5.69502e-18	-0.480831	0.0541476
-0.286419	-0.643977	-0.552259	1.48266	ANXA5	308	ENSG00000164111	4	121667946	121696995	annexin A5	0.0800731	0.0656866	0.222837	0.367342	0.0772292	0.064524
-0.899431	-0.831895	0.876377	0.854949	ANXA6	309	ENSG00000197043	5	151100706	151157785	annexin A6	0.647321	0.0637321	3.087e-24	1.02748e-22	0.639134	0.0638604
0.662394	0.928658	-0.330174	-1.26088	ANXA7	310	ENSG00000138279	10	73375101	73414076	annexin A7	-0.0702042	0.0640425	0.272986	0.427453	-0.0677029	0.0629573
0.806716	0.918044	-0.959864	-0.764895	ANXA9	8416	ENSG00000143412	1	150982249	150995634	annexin A9	-0.855247	0.132859	1.21648e-10	1.3307e-09	-0.822752	0.134155
-0.43561	1.28692	-1.05482	0.203511	AOAH	313	ENSG00000136250	7	36512941	36724549	acyloxyacyl hydrolase	-0.377189	1.9723	0.848335		-0.0103108	0.328191
1.10406	0.58924	-0.857236	-0.836062	AOC1	26	ENSG00000002726	7	150824627	150861504	amine oxidase copper containing 1	-0.896633	0.121789	1.80911e-13	2.69412e-12	-0.870132	0.1227
0.73158	0.421002	-1.47721	0.324632	AOC2	314	ENSG00000131480	17	42844580	42850707	amine oxidase copper containing 2	-0.390396	0.566871	0.491021	0.647367	-0.103451	0.302197
0.788856	0.205169	0.462563	-1.45659	AOC3	8639	ENSG00000131471	17	42851184	42858130	amine oxidase copper containing 3	-0.393271	0.711402	0.580393	0.724421	-0.0713027	0.309913
-0.982697	-0.737763	0.931013	0.789448	AOPEP	84909	ENSG00000148120	9	94726699	95087159	aminopeptidase O (putative)	0.187259	0.106953	0.0799709	0.164298	0.1717	0.103419
0.327428	0.0472463	1.00017	-1.37485	AOX1	316	ENSG00000138356	2	200586014	200677064	aldehyde oxidase 1	-0.176976	1.20401	0.883141		-0.0122499	0.320931
0.744978	0.891039	-0.422545	-1.21347	AP1AR	55435	ENSG00000138660	4	112231740	112273110	adaptor related protein complex 1 associated regulatory protein	-0.166891	0.0741698	0.0244411	0.0612481	-0.159703	0.0729034
0.553149	-0.512519	1.08207	-1.1227	AP1AR-DT		ENSG00000260526	4	112229561	112231596		-0.0171508	0.675069	0.979731	0.988794	-0.0029696	0.298329
-1.37161	0.430253	-0.0245398	0.965899	AP1B1	162	ENSG00000100280	22	29327680	29388583	adaptor related protein complex 1 subunit beta 1	0.0212329	0.0652398	0.744833	0.845363	0.0204835	0.0640314
-0.355385	-1.08952	1.28936	0.155545	AP1G1	164	ENSG00000166747	16	71729000	71809201	adaptor related protein complex 1 subunit gamma 1	0.0637801	0.0645647	0.323227	0.484592	0.06153	0.0634332
0.83096	0.897503	-0.935649	-0.792814	AP1G2	8906	ENSG00000213983	14	23559565	23568070	adaptor related protein complex 1 subunit gamma 2	-0.32327	0.0774669	3.00606e-05	0.000151147	-0.311453	0.0768998
0.748862	0.126152	0.572559	-1.44757	AP1G2-AS1	102724814	ENSG00000258727	14	23561097	23568073	AP1G2 antisense RNA 1	-0.485391	0.623184	0.436045	0.596232	-0.111557	0.312979
0.845986	-0.0792932	-1.37937	0.612673	AP1M1	8907	ENSG00000072958	19	16197854	16245906	adaptor related protein complex 1 subunit mu 1	-0.0715426	0.111431	0.520851	0.67371	-0.0643359	0.105883
0.809664	0.713477	-1.3427	-0.180445	AP1M2	10053	ENSG00000129354	19	10572671	10587315	adaptor related protein complex 1 subunit mu 2	-0.252287	0.0800913	0.00163273	0.00573331	-0.241131	0.079014
-1.01463	-0.70305	0.835999	0.881679	AP1S1	1174	ENSG00000106367	7	101154456	101161596	adaptor related protein complex 1 subunit sigma 1	0.253621	0.0670013	0.000153515	0.000674937	0.245915	0.0664094
-0.148569	-1.33189	0.972753	0.507701	AP1S2	8905	ENSG00000182287	X	15825806	15854931	adaptor related protein complex 1 subunit sigma 2	0.0385322	0.109741	0.725499	0.831452	0.0351173	0.104289
-1.44227	0.841406	0.425665	0.175201	AP1S3	130340	ENSG00000152056	2	223751686	223838027	adaptor related protein complex 1 subunit sigma 3	0.0387826	0.0822631	0.637323	0.76821	0.0366354	0.0799354
0.414829	1.13531	-1.18587	-0.364276	AP2A1	160	ENSG00000196961	19	49767001	49807114	adaptor related protein complex 2 subunit alpha 1	-0.161711	0.0858418	0.059588	0.129043	-0.152437	0.0838268
1.48094	-0.299488	-0.688765	-0.492683	AP2A2	161	ENSG00000183020	11	924881	1012245	adaptor related protein complex 2 subunit alpha 2	-0.0650132	0.0819721	0.427711	0.588972	-0.0612766	0.079676
-0.572244	-1.1165	0.84132	0.847429	AP2B1	163	ENSG00000006125	17	35578046	35726413	adaptor related protein complex 2 subunit beta 1	0.0743509	0.0487926	0.127555	0.239216	0.0728199	0.0482996
-0.827595	1.03495	-0.88549	0.678131	AP2B1P1	401602	ENSG00000234130	X	93222220	93225015	AP2B1 pseudogene 1	-0.0382966	0.992698	0.969227		-0.00355022	0.31541
-0.816731	-0.873928	0.580723	1.10994	AP2M1	1173	ENSG00000161203	3	184174689	184184214	adaptor related protein complex 2 subunit mu 1	0.15905	0.062644	0.0111184	0.031155	0.15417	0.0618454
-1.18081	-0.375772	0.422617	1.13397	AP2S1	1175	ENSG00000042753	19	46838136	46850846	adaptor related protein complex 2 subunit sigma 1	0.345881	0.0916489	0.000160666	0.00070439	0.329187	0.0908965
-0.880725	-0.575471	1.37343	0.0827663	AP3B1	8546	ENSG00000132842	5	78000522	78294762	adaptor related protein complex 3 subunit beta 1	0.108024	0.0734891	0.14158	0.259487	0.103283	0.0719964
-0.709852	-1.00366	0.754941	0.958566	AP3B2	8120	ENSG00000103723	15	82659281	82710112	adaptor related protein complex 3 subunit beta 2	1.7441	0.497385	0.000453969	0.00180625	1.43766	0.542522
0.339055	-1.4629	0.800088	0.323758	AP3D1	8943	ENSG00000065000	19	2100988	2164468	adaptor related protein complex 3 subunit delta 1	0.0355285	0.0622632	0.568259	0.714157	0.0343802	0.0612077
-0.591974	-1.09675	0.946348	0.742379	AP3M1	26985	ENSG00000185009	10	74120255	74150842	adaptor related protein complex 3 subunit mu 1	0.101432	0.0643345	0.114878	0.219831	0.0979749	0.0632969
-0.987156	-0.728969	0.754181	0.961945	AP3M2	10947	ENSG00000070718	8	42152946	42171673	adaptor related protein complex 3 subunit mu 2	0.50046	0.097348	2.73371e-07	1.92054e-06	0.48039	0.0974133
-0.964478	-0.745149	0.691842	1.01779	AP3S1	1176	ENSG00000177879	5	115841592	115914081	adaptor related protein complex 3 subunit sigma 1	0.179488	0.0790813	0.0232282	0.0586428	0.171698	0.0776219
-1.00407	0.533257	1.1289	-0.658087	AP3S2	10239	ENSG00000157823	15	89830599	89894638	adaptor related protein complex 3 subunit sigma 2	0.0468859	0.130726	0.719851	0.827536	0.0407937	0.121942
-0.0737417	-1.38419	0.817865	0.640064	AP4B1	10717	ENSG00000134262	1	113894194	113905201	adaptor related protein complex 4 subunit beta 1	0.0999378	0.117739	0.395989	0.55949	0.0893596	0.111583
0.330294	-1.04192	1.23675	-0.525122	AP4E1	23431	ENSG00000081014	15	50908672	51005895	adaptor related protein complex 4 subunit epsilon 1	0.0292647	0.113213	0.796026	0.879344	0.0263495	0.107213
0.634501	0.465308	-1.49227	0.392461	AP4M1	9179	ENSG00000221838	7	100101549	100110345	adaptor related protein complex 4 subunit mu 1	-0.0808232	0.194288	0.677413	0.797907	-0.0602746	0.168737
-0.626069	1.49283	-0.477243	-0.389521	AP4S1	11154	ENSG00000100478	14	31025106	31130996	adaptor related protein complex 4 subunit sigma 1	-0.0735922	0.276766	0.790316	0.875462	-0.0433039	0.213934
-1.08185	-0.507213	1.1881	0.400965	AP5B1	91056	ENSG00000254470	11	65773898	65780976	adaptor related protein complex 5 subunit beta 1	0.190335	0.128238	0.137748	0.254441	0.168295	0.122219
-0.752308	-0.97037	0.926931	0.795747	AP5M1	55745	ENSG00000053770	14	57268924	57298742	adaptor related protein complex 5 subunit mu 1	0.128935	0.0705023	0.0674289	0.142891	0.123791	0.0692437
-0.460324	-1.19242	0.841701	0.811039	AP5S1	55317	ENSG00000125843	20	3820524	3828838	adaptor related protein complex 5 subunit sigma 1	0.42853	0.235848	0.0692212	0.146105	0.319338	0.221952
0.825563	0.628723	-1.38505	-0.069237	AP5Z1	9907	ENSG00000242802	7	4775615	4794397	adaptor related protein complex 5 subunit zeta 1	-0.24168	0.158584	0.127512	0.239163	-0.202922	0.148987
1.14557	0.529008	-0.890823	-0.78375	APAF1	317	ENSG00000120868	12	98645290	98735433	apoptotic peptidase activating factor 1	-0.185837	0.073392	0.0113377	0.0316727	-0.178193	0.0722312
1.05487	0.633578	-1.01801	-0.670438	APBA1	320	ENSG00000107282	9	69427532	69672371	amyloid beta precursor protein binding family A member 1	-0.720722	0.370232	0.0515734	0.114586	-0.430608	0.359104
1.07154	0.626747	-0.941034	-0.757256	APBA3	9546	ENSG00000011132	19	3750772	3761692	amyloid beta precursor protein binding family A member 3	-0.302704	0.22237	0.17343	0.303371	-0.221375	0.20014
1.03968	0.651591	-0.66634	-1.02493	APBB1	322	ENSG00000166313	11	6395125	6419414	amyloid beta precursor protein binding family B member 1	-0.844649	0.316299	0.00757574	0.0222069	-0.641589	0.33203
-0.789943	0.47323	1.18351	-0.8668	APBB2	323	ENSG00000163697	4	40810027	41216714	amyloid beta precursor protein binding family B member 2	0.0165602	0.0913165	0.856094	0.920506	0.0154859	0.0881008
0.655661	0.947206	-0.360799	-1.24207	APBB3	10307	ENSG00000113108	5	140558268	140564781	amyloid beta precursor protein binding family B member 3	-0.505258	0.236933	0.0329662	0.0789415	-0.3875	0.230506
-0.31987	-1.17161	1.20003	0.291443	APC	324	ENSG00000134982	5	112707498	112846239	APC regulator of WNT signaling pathway	0.268886	0.106963	0.011943	0.0331863	0.248768	0.10457
-1.42064	0.0643755	0.507984	0.848282	APC2	10297	ENSG00000115266	19	1446302	1473244	APC regulator of WNT signaling pathway 2	0.647335	0.848226	0.445366	0.604648	0.0885809	0.324378
0.95448	-0.470199	0.693438	-1.17772	APCDD1	147495	ENSG00000154856	18	10454635	10489949	APC down-regulated 1	-0.118954	0.558765	0.831415	0.903702	-0.030884	0.287096
-1.00371	-0.689127	0.6405	1.05234	APEH	327	ENSG00000164062	3	49674014	49683971	acylaminoacyl-peptide hydrolase	0.309663	0.0656193	2.36903e-06	1.44094e-05	0.301375	0.0652496
-1.15773	-0.512345	0.799208	0.870873	APEX1	328	ENSG00000100823	14	20455191	20457772	apurinic/apyrimidinic endodeoxyribonuclease 1	0.383554	0.0677485	1.50108e-08	1.25983e-07	0.373996	0.0675788
0.735039	0.985616	-0.797272	-0.923383	APEX2	27301	ENSG00000169188	X	55000363	55009057	apurinic/apyrimidinic endodeoxyribonuclease 2	-0.139245	0.082037	0.0896309	0.180292	-0.131736	0.0801338
-1.01772	-0.516008	0.256072	1.27766	APH1A	51107	ENSG00000117362	1	150265399	150269580	aph-1 homolog A, gamma-secretase subunit	0.154439	0.0672697	0.0216862	0.0553054	0.148958	0.0662706
1.11908	0.553175	-0.983525	-0.688726	APH1B	83464	ENSG00000138613	15	63276018	63309126	aph-1 homolog B, gamma-secretase subunit	-0.647612	0.187716	0.000560678	0.00218396	-0.574055	0.189845
-0.823301	-0.839922	1.17333	0.489889	API5	8539	ENSG00000166181	11	43311963	43344529	apoptosis inhibitor 5	0.286651	0.0602603	1.96615e-06	1.21007e-05	0.27994	0.0599198
0.0983512	-1.39867	0.343065	0.957258	API5P1		ENSG00000234558	X	116106921	116108430		1.16886	1.13822	0.304458		0.0969963	0.338534
-1.07623	-0.612316	0.987836	0.700706	APIP	51074	ENSG00000149089	11	34853094	34916379	APAF1 interacting protein	0.391019	0.0938145	3.07284e-05	0.000154107	0.372883	0.093347
-0.439025	-0.500543	1.49821	-0.558642	APLF	200558	ENSG00000169621	2	68467572	68655862	aprataxin and PNKP like factor	0.0625927	0.212791	0.768642	0.861242	0.0447723	0.179975
-0.924993	-0.803492	0.814444	0.91404	APLN	8862	ENSG00000171388	X	129645259	129654956	apelin	2.35219	0.376027	3.96531e-10	4.09328e-09	2.2318	0.384726
0.791138	0.910889	-1.07002	-0.632003	APLP1	333	ENSG00000105290	19	35867899	35879792	amyloid beta precursor like protein 1	-0.896556	0.516478	0.0825811	0.168814	-0.352532	0.431349
0.889438	0.762928	-1.1879	-0.464463	APLP2	334	ENSG00000084234	11	130068147	130144811	amyloid beta precursor like protein 2	-0.054277	0.0466104	0.244228	0.393661	-0.0543467	0.046228
-1.12819	-0.55478	0.801493	0.881481	APMAP	57136	ENSG00000101474	20	24962925	24992751	adipocyte plasma membrane associated protein	0.272591	0.0667943	4.48327e-05	0.000218237	0.264595	0.066288
-1.43157	0.833466	0.102716	0.495384	APOA1	335	ENSG00000118137	11	116835751	116837622	apolipoprotein A1	0.375858	2.35804	0.873358		0.00717412	0.329516
0.504191	1.0691	-0.359323	-1.21396	APOBEC1	339	ENSG00000111701	12	7649400	7665908	apolipoprotein B mRNA editing enzyme catalytic subunit 1	-0.852279	0.491624	0.082989	0.169404	-0.355173	0.419186
0.745453	0.975469	-0.937835	-0.783087	APOBEC3B	9582	ENSG00000179750	22	38982347	38992804	apolipoprotein B mRNA editing enzyme catalytic subunit 3B	-1.12818	0.230865	1.02518e-06	6.60157e-06	-1.04294	0.237119
0.0148164	1.37819	-0.951597	-0.441407	APOBEC3C	27350	ENSG00000244509	22	39014257	39020352	apolipoprotein B mRNA editing enzyme catalytic subunit 3C	-0.127804	0.0806114	0.112867	0.216892	-0.120613	0.0787623
0.634769	1.05655	-1.00457	-0.686747	APOBEC3D	140564	ENSG00000243811	22	39021113	39033277	apolipoprotein B mRNA editing enzyme catalytic subunit 3D	-2.24344	1.00297	0.0252992	0.0630033	-0.315931	0.546508
1.25843	0.265862	-0.458892	-1.0654	APOBEC3F	200316	ENSG00000128394	22	39040604	39055972	apolipoprotein B mRNA editing enzyme catalytic subunit 3F	-0.559255	0.196525	0.00443114	0.0139301	-0.476963	0.196583
0.703677	1.00996	-0.947776	-0.76586	APOBEC3G	60489	ENSG00000239713	22	39077067	39087743	apolipoprotein B mRNA editing enzyme catalytic subunit 3G	-0.807138	0.206979	9.6348e-05	0.000440767	-0.723589	0.2119
-0.555072	1.44095	-0.77699	-0.108884	APOBEC3H	164668	ENSG00000100298	22	39097224	39104067	apolipoprotein B mRNA editing enzyme catalytic subunit 3H	-0.784151	0.764659	0.305132	0.465026	-0.131359	0.336138
-0.806567	1.44194	-0.132744	-0.502629	APOBEC4	403314	ENSG00000173627	1	183646275	183653316	apolipoprotein B mRNA editing enzyme catalytic polypeptide like 4	-0.60217	2.27847	0.791559		-0.0123334	0.329483
0.402306	0.958261	-1.38538	0.0248105	APOBR	55911	ENSG00000184730	16	28494643	28498964	apolipoprotein B receptor	-2.02658	1.556	0.192768		-0.0927098	0.344102
0.934394	-0.704302	0.780609	-1.0107	APOC1	341	ENSG00000130208	19	44914247	44919349	apolipoprotein C1	-0.0706926	0.40655	0.861956	0.923541	-0.0280446	0.258142
0.958158	0.766141	-0.797514	-0.926786	APOD	347	ENSG00000189058	3	195568705	195584033	apolipoprotein D	-1.00138	0.241348	3.3375e-05	0.00016615	-0.899388	0.249226
0.580873	1.10684	-0.925414	-0.762299	APOE	348	ENSG00000130203	19	44905791	44909393	apolipoprotein E	-1.58191	0.497156	0.00146308	0.00520686	-1.23228	0.55677
1.16586	0.158641	-1.26989	-0.054609	APOH	350	ENSG00000091583	17	66212033	66256525	apolipoprotein H	-2.32878	2.43366	0.338614		-0.0440972	0.334006
0.840214	0.889734	-0.919979	-0.80997	APOL1	8542	ENSG00000100342	22	36253071	36267530	apolipoprotein L1	-2.45846	0.151993	7.59676e-59	1.21995e-56	-2.44005	0.152318
0.781591	0.944722	-0.920333	-0.805979	APOL2	23780	ENSG00000128335	22	36226209	36239954	apolipoprotein L2	-0.884996	0.146904	1.69826e-09	1.62893e-08	-0.845839	0.148685
0.780911	0.940949	-0.755122	-0.966739	APOL3	80833	ENSG00000128284	22	36140329	36166177	apolipoprotein L3	-2.23693	0.38592	6.77667e-09	5.92369e-08	-2.10137	0.396296
0.180528	1.26331	-0.316253	-1.12758	APOL4	80832	ENSG00000100336	22	36189124	36204840	apolipoprotein L4	-0.981003	1.027	0.339472		-0.0956337	0.334761
0.893995	0.837596	-0.864979	-0.866613	APOL6	80830	ENSG00000221963	22	35648446	35668404	apolipoprotein L6	-2.08856	0.084536	9.17055e-135	1.09884e-131	-2.08196	0.0846358
0.944192	0.780483	-0.784569	-0.940106	APOLD1	81575	ENSG00000178878	12	12725917	12829975	apolipoprotein L domain containing 1	-0.494087	0.252444	0.0503226	0.112367	-0.362648	0.24147
1.29967	0.0193957	-1.12885	-0.190216	APOM	55937	ENSG00000204444	6	31652416	31658210	apolipoprotein M	-0.329283	0.787724	0.675933	0.796807	-0.0501502	0.310748
-0.96818	-0.744712	0.713217	0.999676	APOO	79135	ENSG00000184831	X	23833353	23907938	apolipoprotein O	0.430537	0.122433	0.00043724	0.00174817	0.399231	0.121669
0.498223	-0.144092	0.97799	-1.33212	APOOL	139322	ENSG00000155008	X	85003877	85093315	apolipoprotein O like	-0.0320354	0.0988882	0.745972	0.846122	-0.0293448	0.094842
-0.811635	-0.914055	0.954359	0.771331	APP	351	ENSG00000142192	21	25880550	26171128	amyloid beta precursor protein	0.589472	0.0483999	4.01238e-34	2.47039e-32	0.584647	0.0484423
1.26651	-0.925417	0.320049	-0.661146	APP-DT		ENSG00000273492	21	26170871	26217381		-0.423186	1.03333	0.682145		-0.0400019	0.319607
1.11999	0.403872	-0.302888	-1.22097	APPBP2	10513	ENSG00000062725	17	60443158	60526242	amyloid beta precursor protein binding protein 2	-0.112103	0.082256	0.17293	0.302708	-0.105861	0.080168
1.01937	0.689639	-0.966136	-0.742874	APPBP2-DT		ENSG00000259349	17	60526272	60550798		-1.43298	1.26752	0.25825		-0.096239	0.341151
-0.68871	-1.00002	1.06769	0.621037	APPL1	26060	ENSG00000157500	3	57227726	57278105	adaptor protein, phosphotyrosine interacting with PH domain and leucine zipper 1	0.403856	0.0717013	1.77639e-08	1.47578e-07	0.393151	0.0715175
1.00241	0.716039	-0.804771	-0.913678	APPL2	55198	ENSG00000136044	12	105173297	105236203	adaptor protein, phosphotyrosine interacting with PH domain and leucine zipper 2	-0.304775	0.0711292	1.82894e-05	9.5314e-05	-0.295034	0.0706167
0.616148	0.357394	0.517903	-1.49144	APRG1	339883	ENSG00000198590	3	37381062	37440186	APRG1 tumor suppressor candidate	-0.594367	0.768774	0.439442	0.599351	-0.0961467	0.321785
-1.03609	-0.591585	0.458964	1.16871	APRT	353	ENSG00000198931	16	88809339	88811937	adenine phosphoribosyltransferase	0.565805	0.0958952	3.62975e-09	3.30558e-08	0.546565	0.0961754
0.0535839	-0.0910843	-1.20357	1.24107	APTR	100505854	ENSG00000214293	7	77657659	77696277	Alu-mediated CDKN1A/p21 transcriptional regulator	0.00820348	0.195575	0.966542	0.982051	0.0063771	0.168531
-1.06026	-0.646933	0.859205	0.84799	APTX	54840	ENSG00000137074	9	32886601	33025130	aprataxin	0.401126	0.101397	7.62219e-05	0.000355588	0.379832	0.100845
-0.794243	-0.91302	0.655899	1.05136	AQP1	358	ENSG00000240583	7	30911853	30925517	aquaporin 1 (Colton blood group)	1.19297	0.516887	0.0209994	0.0537918	0.65968	0.601912
-1.09363	-0.55593	1.08399	0.565575	AQP11	282679	ENSG00000178301	11	77589391	77610356	aquaporin 11	0.673979	0.263873	0.0106439	0.0299547	0.527039	0.268526
0.173208	-0.555551	-0.946429	1.32877	AQP2	359	ENSG00000167580	12	49950737	49958878	aquaporin 2	0.131086	1.54462	0.932368		0.00601001	0.325155
0.981185	0.737004	-0.954003	-0.764186	AQP3	360	ENSG00000165272	9	33441156	33447596	aquaporin 3 (Gill blood group)	-0.895177	0.0830778	4.50931e-27	1.84846e-25	-0.88292	0.0833524
-0.857283	-0.854725	0.670226	1.04178	AQP5	362	ENSG00000161798	12	49961872	49965682	aquaporin 5	0.467773	0.158283	0.0031237	0.0101987	0.415113	0.157003
-0.934072	-0.78612	0.737633	0.982559	AQP5-AS1	101927318	ENSG00000257588	12	49951512	49962924	AQP5 and AQP2 antisense RNA 2	0.770384	0.163616	2.49553e-06	1.51551e-05	0.71852	0.166041
0.444778	0.890793	0.079471	-1.41504	AQP6	363	ENSG00000086159	12	49967194	49977139	aquaporin 6	-0.361274	0.624921	0.563189	0.70978	-0.0810276	0.303914
0.880836	0.838	-1.00889	-0.709943	AQP7		ENSG00000165269	9	33383179	33402682		-1.25038	0.483286	0.00967481	0.0275612	-0.824439	0.560164
0.0106652	-1.4021	0.877336	0.514095	AQR	9716	ENSG00000021776	15	34851782	34969742	aquarius intron-binding spliceosomal factor	0.119896	0.0723361	0.0974221	0.192808	0.115005	0.0709234
0.497109	1.08344	-1.19646	-0.384087	ARAF	369	ENSG00000078061	X	47561205	47571908	A-Raf proto-oncogene, serine/threonine kinase	-0.195812	0.0918339	0.0329872	0.0789796	-0.183575	0.0896808
0.851813	0.86049	-0.671782	-1.04052	ARAP1	116985	ENSG00000186635	11	72685069	72793599	ArfGAP with RhoGAP domain, ankyrin repeat and PH domain 1	-0.204408	0.0794223	0.0100621	0.028534	-0.194851	0.078097
1.04297	0.662943	-0.759051	-0.946865	ARAP2	116984	ENSG00000047365	4	35948221	36244514	ArfGAP with RhoGAP domain, ankyrin repeat and PH domain 2	-0.404736	0.0815526	6.94556e-07	4.58831e-06	-0.390766	0.0812698
0.726869	0.994755	-0.868897	-0.852726	ARAP3	64411	ENSG00000120318	5	141653401	141682230	ArfGAP with RhoGAP domain, ankyrin repeat and PH domain 3	-0.225616	0.11533	0.0504339	0.112535	-0.204772	0.11156
0.992604	-1.01454	0.712826	-0.690894	ARC	23237	ENSG00000198576	8	142611049	142614479	activity regulated cytoskeleton associated protein	-0.0557665	0.757078	0.941281	0.970373	-0.00871141	0.30447
-0.287578	-1.22531	0.388001	1.12489	ARCN1	372	ENSG00000095139	11	118572390	118603033	archain 1	0.0769397	0.0588564	0.191129	0.327223	0.0749008	0.058009
0.869754	0.862251	-0.874025	-0.85798	AREG	374	ENSG00000109321	4	74445136	74455005	amphiregulin	-1.54365	0.0781885	9.28005e-87	3.44179e-84	-1.53627	0.0783305
-0.848842	-0.822762	1.15627	0.515335	AREL1	9870	ENSG00000119682	14	74653437	74713117	apoptosis resistant E3 ubiquitin protein ligase 1	0.236101	0.0782723	0.00255796	0.00854318	0.225999	0.077205
-0.943091	-0.741514	0.576041	1.10856	ARF1	375	ENSG00000143761	1	228082660	228099212	ADP ribosylation factor 1	0.20676	0.0554197	0.000190875	0.000823847	0.203723	0.0549911
-1.14493	-0.524103	0.730539	0.938493	ARF3	377	ENSG00000134287	12	48935723	48957487	ADP ribosylation factor 3	0.170108	0.056313	0.00252142	0.00844105	0.166006	0.0557689
0.782894	0.944657	-0.828528	-0.899023	ARF4	378	ENSG00000168374	3	57571363	57598220	ADP ribosylation factor 4	-0.357234	0.0524763	9.92803e-12	1.23423e-10	-0.351502	0.0523601
-0.219881	-1.31107	0.591037	0.93991	ARF4-AS1	106144532	ENSG00000272146	3	57597531	57600927	ARF4 antisense RNA 1	1.21066	1.42944	0.397025		0.063987	0.332673
-1.13597	-0.519538	0.641606	1.0139	ARF5	381	ENSG00000004059	7	127588386	127591700	ADP ribosylation factor 5	0.224028	0.0862579	0.00939902	0.0268442	0.212246	0.0847263
0.937303	0.753076	-1.09584	-0.59454	ARF6	382	ENSG00000165527	14	49893079	49897054	ADP ribosylation factor 6	-0.17883	0.0564441	0.00153354	0.00542786	-0.174369	0.0559045
0.519785	-0.98791	1.14078	-0.672658	ARFGAP1	55738	ENSG00000101199	20	63272785	63289790	ADP ribosylation factor GTPase activating protein 1	0.00644337	0.0782671	0.934388	0.966657	0.0061789	0.0761833
-1.09004	-0.569109	1.06572	0.593426	ARFGAP2	84364	ENSG00000149182	11	47164299	47177125	ADP ribosylation factor GTPase activating protein 2	0.173164	0.089582	0.0532332	0.117697	0.162702	0.0874085
1.00443	0.704996	-0.983244	-0.726179	ARFGAP3	26286	ENSG00000242247	22	42796502	42858106	ADP ribosylation factor GTPase activating protein 3	-0.722181	0.0779006	1.85198e-20	4.84845e-19	-0.710234	0.0781158
0.918721	0.39248	0.10014	-1.41134	ARFGEF1	10565	ENSG00000066777	8	67173511	67343781	ADP ribosylation factor guanine nucleotide exchange factor 1	-0.105308	0.0681851	0.122482	0.23171	-0.101092	0.066971
-0.303145	-1.28198	0.728059	0.857066	ARFGEF1-DT		ENSG00000271966	8	67343975	67345087		1.00169	1.63149	0.539234		0.0406138	0.329456
0.879626	0.779905	-0.482645	-1.17689	ARFGEF2	10564	ENSG00000124198	20	48921711	49036693	ADP ribosylation factor guanine nucleotide exchange factor 2	-0.321022	0.0637148	4.69387e-07	3.19286e-06	-0.312518	0.0634062
0.785687	-1.11087	0.902791	-0.577605	ARFGEF3	57221	ENSG00000112379	6	138161939	138344663	ARFGEF family member 3	0.0531721	0.210834	0.800887	0.882676	0.0382809	0.178537
-0.923677	1.41451	-0.132459	-0.358376	ARFIP1	27236	ENSG00000164144	4	152779937	152918463	ADP ribosylation factor interacting protein 1	-0.0138796	0.0708266	0.844637	0.912913	-0.0131577	0.0692916
-0.544448	-1.09931	0.55344	1.09032	ARFIP2	23647	ENSG00000132254	11	6474683	6481479	ADP ribosylation factor interacting protein 2	0.18164	0.0760498	0.0169202	0.0447631	0.173733	0.0747308
-0.426753	-0.497525	-0.573044	1.49732	ARFRP1	10139	ENSG00000101246	20	63698642	63708025	ADP ribosylation factor related protein 1	0.158467	0.132309	0.231031	0.377073	0.138525	0.124821
-0.621115	-1.06881	0.993189	0.696735	ARG2	384	ENSG00000081181	14	67619920	67651708	arginase 2	0.977533	0.160195	1.04666e-09	1.02863e-08	0.934072	0.162213
1.0865	0.602472	-0.967437	-0.721534	ARGLU1	55082	ENSG00000134884	13	106541673	106568137	arginine and glutamate rich 1	-0.201842	0.0699687	0.00391721	0.0124629	-0.194421	0.0690346
0.948687	0.778402	-0.900035	-0.827055	ARHGAP1	392	ENSG00000175220	11	46677080	46700619	Rho GTPase activating protein 1	-0.265292	0.0823216	0.00127022	0.00458121	-0.253198	0.0812543
-0.32118	-0.926866	1.41742	-0.169373	ARHGAP10	79658	ENSG00000071205	4	147732063	148072776	Rho GTPase activating protein 10	0.174209	0.140784	0.215933	0.35886	0.149996	0.132287
-0.865248	-0.866181	0.898521	0.832909	ARHGAP11A	9824	ENSG00000198826	15	32615144	32639941	Rho GTPase activating protein 11A	0.594426	0.0712397	7.17995e-17	1.44686e-15	0.583892	0.0713767
-1.23666	-0.31195	1.06949	0.479118	ARHGAP11A-SCG5		ENSG00000288864	15	32613860	32697095		1.09093	2.13337	0.609095		0.0257376	0.330143
-0.311014	-0.11096	1.39461	-0.972637	ARHGAP11B	89839	ENSG00000285077	15	30624494	30649529	Rho GTPase activating protein 11B	0.133458	0.534151	0.802702	0.88409	0.0377798	0.28443
1.41604	-0.894091	-0.0889296	-0.433024	ARHGAP11B-DT		ENSG00000247728	15	30616998	30625773		-0.690483	1.65562	0.676639		-0.027007	0.327581
0.925528	0.787109	-1.02558	-0.68706	ARHGAP12	94134	ENSG00000165322	10	31805398	31928876	Rho GTPase activating protein 12	-0.306586	0.064529	2.02279e-06	1.24232e-05	-0.298526	0.0641528
0.581922	-1.24066	-0.343378	1.00211	ARHGAP17	55114	ENSG00000140750	16	24919389	25015666	Rho GTPase activating protein 17	0.0170191	0.0919297	0.853126	0.918516	0.0158972	0.0885948
1.28897	0.174789	-0.387866	-1.0759	ARHGAP18	93663	ENSG00000146376	6	129576132	129710177	Rho GTPase activating protein 18	-0.137152	0.0727531	0.0594063	0.12872	-0.131227	0.0713955
0.120084	-0.304032	-1.10724	1.29119	ARHGAP19	84986	ENSG00000213390	10	97222173	97292673	Rho GTPase activating protein 19	0.0153265	0.127009	0.903951	0.949164	0.013562	0.118625
1.17804	-1.15112	0.365217	-0.39213	ARHGAP21	57584	ENSG00000107863	10	24583609	24723887	Rho GTPase activating protein 21	-0.00565404	0.0698567	0.935491	0.967085	-0.00534773	0.0683447
-0.894219	-0.83541	0.807136	0.922493	ARHGAP22	58504	ENSG00000128805	10	48446036	48656265	Rho GTPase activating protein 22	2.44704	0.574539	2.05224e-05	0.000105994	2.15892	0.606869
0.750763	0.973648	-0.834193	-0.890218	ARHGAP23	57636	ENSG00000275832	17	38419280	38512385	Rho GTPase activating protein 23	-2.06352	0.33309	5.82547e-10	5.91933e-09	-1.95584	0.340615
0.611685	1.05738	-1.07423	-0.594837	ARHGAP24	83478	ENSG00000138639	4	85475150	86002668	Rho GTPase activating protein 24	-0.749012	0.243686	0.00211442	0.00723238	-0.627477	0.250408
-0.335691	1.2338	0.244402	-1.14251	ARHGAP25	9938	ENSG00000163219	2	68679601	68826833	Rho GTPase activating protein 25	-0.950692	1.54442	0.538181		-0.0414543	0.328994
0.991008	-1.16627	0.654355	-0.479089	ARHGAP26	23092	ENSG00000145819	5	142770377	143229011	Rho GTPase activating protein 26	0.00722522	0.0829362	0.930578	0.964339	0.00685758	0.0804443
0.90424	0.820669	-0.965405	-0.759503	ARHGAP27	201176	ENSG00000159314	17	45393902	45434421	Rho GTPase activating protein 27	-0.431294	0.061011	1.5592e-12	2.14177e-11	-0.42297	0.0609401
0.762951	0.962736	-0.894838	-0.830849	ARHGAP27P1-BPTFP1-KPNA2P3	109286553	ENSG00000215769	17	64749663	64781707	ARHGAP27P1-BPTFP1-KPNA2P3 readthrough, transcribed pseudogene	-0.88252	0.129013	7.89031e-12	9.91989e-11	-0.852419	0.130236
0.308431	-1.3873	0.0931824	0.985689	ARHGAP28	79822	ENSG00000088756	18	6729716	6915716	Rho GTPase activating protein 28	0.495657	0.80167	0.536391	0.687344	0.0753387	0.317206
1.04815	0.654719	-0.744567	-0.958302	ARHGAP29	9411	ENSG00000137962	1	94148988	94275068	Rho GTPase activating protein 29	-0.588312	0.0761864	1.14514e-14	1.92841e-13	-0.576147	0.0763299
1.06734	0.631673	-0.753473	-0.945542	ARHGAP30	257106	ENSG00000186517	1	161046946	161069970	Rho GTPase activating protein 30	-2.09335	0.674744	0.00191936	0.00662825	-1.56641	0.782921
-0.825128	-0.0506962	-0.54521	1.42103	ARHGAP31	57514	ENSG00000031081	3	119294383	119420714	Rho GTPase activating protein 31	0.238289	1.16398	0.837792		0.0182712	0.320451
1.21541	0.301792	-0.38394	-1.13326	ARHGAP32	9743	ENSG00000134909	11	128965060	129279324	Rho GTPase activating protein 32	-0.305552	0.0738941	3.54967e-05	0.000176149	-0.296033	0.0733433
0.610652	0.876529	-0.130016	-1.35716	ARHGAP33	115703	ENSG00000004777	19	35774532	35788822	Rho GTPase activating protein 33	-0.781914	0.336397	0.0201053	0.0518424	-0.542164	0.347987
-0.152966	-1.30958	1.04119	0.421354	ARHGAP35	2909	ENSG00000160007	19	46860997	47005077	Rho GTPase activating protein 35	0.176718	0.0676635	0.00900889	0.0258676	0.170534	0.066716
-1.04076	-0.571864	0.425849	1.18678	ARHGAP39	80728	ENSG00000147799	8	144529179	144685846	Rho GTPase activating protein 39	0.179725	0.161829	0.266748	0.420772	0.147106	0.149153
-0.850298	-0.879833	0.920786	0.809345	ARHGAP4	393	ENSG00000089820	X	153907367	153934999	Rho GTPase activating protein 4	0.809283	0.153356	1.31205e-07	9.63593e-07	0.764887	0.155376
0.594411	-1.15559	1.04014	-0.478965	ARHGAP40	343578	ENSG00000124143	20	38601809	38651035	Rho GTPase activating protein 40	0.273252	1.70739	0.872849		0.0102016	0.326622
0.975979	0.748494	-0.849628	-0.874845	ARHGAP42	143872	ENSG00000165895	11	100687288	100993941	Rho GTPase activating protein 42	-0.562248	0.0800576	2.17081e-12	2.93531e-11	-0.5487	0.0801884
-0.688752	1.15379	-0.969493	0.504459	ARHGAP42-AS1	100128386	ENSG00000248027	11	100684162	100687955	ARHGAP42 antisense RNA 1	-0.360565	1.22341	0.768207		-0.0244594	0.32224
-0.612618	-1.08652	0.831537	0.867598	ARHGAP44	9912	ENSG00000006740	17	12789498	12991643	Rho GTPase activating protein 44	0.153817	0.161187	0.339946	0.502166	0.126153	0.147748
0.935125	0.592805	-1.3148	-0.21313	ARHGAP45	23526	ENSG00000180448	19	1065923	1086628	Rho GTPase activating protein 45	-0.220679	0.203462	0.278089	0.433613	-0.165322	0.181166
1.27958	-0.802782	0.311389	-0.788191	ARHGAP5	394	ENSG00000100852	14	32076114	32159728	Rho GTPase activating protein 5	-0.0445054	0.0695157	0.522029	0.674769	-0.0426055	0.0680625
-0.173588	1.08528	-1.28544	0.373751	ARHGAP5-AS1		ENSG00000258655	14	32074946	32076793		-0.0795732	0.293313	0.786167	0.873132	-0.0446257	0.221284
0.943374	-0.791507	0.78198	-0.933847	ARHGAP8	23779	ENSG00000241484	22	44752558	44862788	Rho GTPase activating protein 8	-0.0832651	0.341891	0.807585	0.887711	-0.0403129	0.239578
0.388621	1.05744	-1.30837	-0.137696	ARHGAP9	64333	ENSG00000123329	12	57472264	57488814	Rho GTPase activating protein 9	-1.1187	1.52387	0.462877		-0.0513897	0.330626
-0.643282	-0.791488	0.0353105	1.39946	ARHGDIA	396	ENSG00000141522	17	81867721	81871378	Rho GDP dissociation inhibitor alpha	0.141569	0.0648487	0.0290312	0.0708917	0.136831	0.0638995
0.645564	1.05338	-0.972816	-0.72613	ARHGDIB	397	ENSG00000111348	12	14942031	14961728	Rho GDP dissociation inhibitor beta	-1.86269	0.329746	1.61509e-08	1.34897e-07	-1.7463	0.338611
0.963257	-1.3995	0.313971	0.122274	ARHGDIG	398	ENSG00000242173	16	280450	283010	Rho GDP dissociation inhibitor gamma	-0.193491	2.58877	0.94042		-0.00314846	0.329817
-0.829566	-0.898584	0.789532	0.938619	ARHGEF1		ENSG00000076928	19	41883173	41930150		0.471628	0.0720913	6.06609e-11	6.87211e-10	0.460739	0.0720622
0.995294	0.713914	-0.99428	-0.714928	ARHGEF10	9639	ENSG00000104728	8	1823926	1958641	Rho guanine nucleotide exchange factor 10	-1.19528	0.772478	0.121783	0.230612	-0.220937	0.395508
0.749895	0.965406	-0.726271	-0.98903	ARHGEF10L	55160	ENSG00000074964	1	17539698	17697874	Rho guanine nucleotide exchange factor 10 like	-0.438281	0.0884013	7.12741e-07	4.69445e-06	-0.421065	0.0882435
1.2804	0.250713	-0.514999	-1.01612	ARHGEF11	9826	ENSG00000132694	1	156934840	157045742	Rho guanine nucleotide exchange factor 11	-0.229884	0.0835829	0.00595277	0.0180401	-0.21887	0.0821885
1.37507	-0.147168	-0.205505	-1.0224	ARHGEF12	23365	ENSG00000196914	11	120336413	120489937	Rho guanine nucleotide exchange factor 12	-0.16909	0.0708274	0.0169701	0.0448572	-0.162447	0.0697126
1.25497	0.263391	-1.07776	-0.4406	ARHGEF16	27237	ENSG00000130762	1	3454665	3481113	Rho guanine nucleotide exchange factor 16	-0.207156	0.0848257	0.0146008	0.0394103	-0.196178	0.0831723
0.899008	0.832399	-0.863502	-0.867905	ARHGEF17	9828	ENSG00000110237	11	73308276	73369388	Rho guanine nucleotide exchange factor 17	-0.983813	0.113088	3.33332e-18	7.49251e-17	-0.962231	0.113836
-0.902461	1.43018	-0.242655	-0.285066	ARHGEF17-AS1	100287837	ENSG00000257038	11	73307235	73309361	ARHGEF17 antisense RNA 1	-0.252229	1.18004	0.830746		-0.0181892	0.320878
0.962211	0.425911	-1.37572	-0.0124042	ARHGEF18	23370	ENSG00000104880	19	7348937	7472485	Rho/Rac guanine nucleotide exchange factor 18	-0.151501	0.103384	0.142806	0.261121	-0.139019	0.0996819
-1.27826	-0.22934	0.456301	1.0513	ARHGEF19	128272	ENSG00000142632	1	16197854	16212652	Rho guanine nucleotide exchange factor 19	0.332344	0.136296	0.0147527	0.0397719	0.296812	0.133007
1.01278	0.705312	-0.837842	-0.880248	ARHGEF2	9181	ENSG00000116584	1	155946851	156007070	Rho/Rac guanine nucleotide exchange factor 2	-0.421573	0.0713596	3.46878e-09	3.16724e-08	-0.410707	0.0712173
1.04282	0.233576	-1.36048	0.0840765	ARHGEF2-AS2	107985209	ENSG00000273002	1	155978799	155982986	ARHGEF2 antisense RNA 2	-1.17624	1.27849	0.357561		-0.0769418	0.334246
1.09481	0.530059	-0.495961	-1.12891	ARHGEF25	115557	ENSG00000240771	12	57610180	57617245	Rho guanine nucleotide exchange factor 25	-0.200725	0.761161	0.792004	0.876647	-0.0319912	0.306512
-1.11972	0.999196	0.668775	-0.548256	ARHGEF26	26084	ENSG00000114790	3	154121003	154257827	Rho guanine nucleotide exchange factor 26	0.00826263	0.169567	0.961136	0.979879	0.00678989	0.151141
0.610222	-1.48856	0.553364	0.324974	ARHGEF26-AS1	100507524	ENSG00000243069	3	154024401	154121347	ARHGEF26 antisense RNA 1	0.638994	1.76515	0.717347		0.0225546	0.32785
0.944025	0.771223	-1.00424	-0.711003	ARHGEF28	64283	ENSG00000214944	5	73626158	73941993	Rho guanine nucleotide exchange factor 28	-0.60108	0.114354	1.46956e-07	1.0722e-06	-0.573705	0.114822
0.89779	0.74259	-0.434761	-1.20562	ARHGEF3	50650	ENSG00000163947	3	56727418	57079329	Rho guanine nucleotide exchange factor 3	-0.203305	0.0950256	0.0323975	0.077764	-0.189874	0.0927198
-0.37991	-1.22867	0.642643	0.96594	ARHGEF33	100271715	ENSG00000214694	2	38889875	38975454	Rho guanine nucleotide exchange factor 33	0.376008	1.4732	0.798544		0.0184944	0.325122
0.0636648	-0.976907	-0.444654	1.3579	ARHGEF34P		ENSG00000204959	7	144272445	144286966		0.105329	0.233333	0.651692	0.778244	0.071443	0.193014
1.37835	-0.227335	-1.01485	-0.136162	ARHGEF35	445328	ENSG00000213214	7	144186083	144195879	Rho guanine nucleotide exchange factor 35	-0.107725	0.207541	0.603722	0.7426	-0.0779088	0.177928
0.550579	-1.49384	0.572732	0.370527	ARHGEF35-AS1		ENSG00000244198	7	144194858	144280547		0.671389	1.02991	0.51447	0.66788	0.0657673	0.324875
0.6411	0.916524	-1.29644	-0.261183	ARHGEF37	389337	ENSG00000183111	5	149551947	149634968	Rho guanine nucleotide exchange factor 37	-0.39508	0.172137	0.0217249	0.0553951	-0.334854	0.167252
0.974347	0.748551	-0.916818	-0.80608	ARHGEF38	54848	ENSG00000236699	4	105552620	105708093	Rho guanine nucleotide exchange factor 38	-0.655197	0.113708	8.3082e-09	7.18583e-08	-0.628724	0.114326
-0.0678094	1.36098	-0.254806	-1.03837	ARHGEF38-IT1	100874374	ENSG00000249885	4	105561591	105570238	ARHGEF38 intronic transcript 1	-0.805507	0.89154	0.36626	0.529465	-0.101262	0.331261
-1.17841	1.24062	0.156369	-0.218576	ARHGEF39	84904	ENSG00000137135	9	35658875	35675866	Rho guanine nucleotide exchange factor 39	-0.00228519	0.149252	0.987784	0.992952	-0.00176771	0.136301
0.879525	0.852348	-0.877062	-0.854811	ARHGEF4	50649	ENSG00000136002	2	130836914	131047263	Rho guanine nucleotide exchange factor 4	-0.845941	0.121275	3.04983e-12	4.04316e-11	-0.818801	0.122259
1.08684	0.546437	-0.511342	-1.12193	ARHGEF4-AS1	121853076	ENSG00000233221	2	130830978	130836994	ARHGEF4 antisense RNA 1	-1.78981	1.17961	0.129193		-0.143841	0.36381
0.00152136	-1.41179	0.78393	0.626339	ARHGEF40	55701	ENSG00000165801	14	21070273	21090248	Rho guanine nucleotide exchange factor 40	0.0848288	0.10252	0.40799	0.570542	0.0777479	0.0982729
0.89116	0.378482	-1.42747	0.157829	ARHGEF5	7984	ENSG00000050327	7	144355288	144380632	Rho guanine nucleotide exchange factor 5	-0.132584	0.129011	0.304093	0.463848	-0.116093	0.121537
0.303841	0.178639	-1.41584	0.933361	ARHGEF6	9459	ENSG00000129675	X	136665547	136780932	Rac/Cdc42 guanine nucleotide exchange factor 6	0.044464	2.3181	0.984697		0.000965479	0.329149
-0.754307	-0.8613	1.24603	0.369574	ARHGEF7	8874	ENSG00000102606	13	111114559	111305737	Rho guanine nucleotide exchange factor 7	0.108547	0.0903771	0.229736	0.375784	0.101473	0.0876105
-1.15541	-0.488998	1.0144	0.630011	ARHGEF9	23229	ENSG00000131089	X	63634967	63809274	Cdc42 guanine nucleotide exchange factor 9	0.946826	0.454381	0.037181	0.0872767	0.508429	0.471973
-0.335751	-0.993067	1.37793	-0.0491081	ARID1A	8289	ENSG00000117713	1	26693236	26782104	AT-rich interaction domain 1A	0.0750012	0.0715455	0.2945	0.452901	0.0718154	0.0700487
1.07304	-0.708002	-0.982735	0.617696	ARID1B	57492	ENSG00000049618	6	156776020	157210779	AT-rich interaction domain 1B	-0.014079	0.081922	0.863549	0.924692	-0.0132026	0.0795242
0.374922	-1.18404	1.15627	-0.34716	ARID2	196528	ENSG00000189079	12	45729706	45908040	AT-rich interaction domain 2	0.0577979	0.0789348	0.464032	0.622081	0.0549732	0.07687
1.35737	-0.00363835	-1.02418	-0.329552	ARID3A	1820	ENSG00000116017	19	925781	975939	AT-rich interaction domain 3A	-0.061758	0.215801	0.77474	0.865595	-0.0433378	0.181655
0.629029	1.07417	-0.854873	-0.84833	ARID3B	10620	ENSG00000179361	15	74541206	74598131	AT-rich interaction domain 3B	-0.129354	0.221531	0.559282	0.706908	-0.0902931	0.187401
-0.56993	-0.308617	1.48665	-0.608107	ARID3BP1		ENSG00000227288	1	81501794	81503468		0.147881	1.32061	0.91084		0.00902801	0.322684
-0.606534	1.13068	0.517772	-1.04192	ARID3C	138715	ENSG00000205143	9	34621049	34629066	AT-rich interaction domain 3C	-0.105451	1.45528	0.942235		-0.00502673	0.324295
0.714661	0.674198	0.0370931	-1.42595	ARID4A	5926	ENSG00000032219	14	58298504	58373887	AT-rich interaction domain 4A	-0.224154	0.108885	0.0395305	0.091878	-0.205474	0.105738
1.00986	0.653981	-0.541821	-1.12202	ARID4B	51742	ENSG00000054267	1	235131634	235328219	AT-rich interaction domain 4B	-0.359927	0.0832887	1.55013e-05	8.19356e-05	-0.345772	0.0827848
-0.92586	-0.732171	0.488297	1.16973	ARID5A	10865	ENSG00000196843	2	96536743	96552634	AT-rich interaction domain 5A	0.366133	0.32551	0.260676	0.413666	0.20296	0.261135
-0.709515	-1.00715	0.924587	0.792075	ARID5B	84159	ENSG00000150347	10	61901684	62096944	AT-rich interaction domain 5B	0.446516	0.0978412	5.02639e-06	2.89771e-05	0.42637	0.0975799
-0.398092	-0.977352	1.37343	0.00201639	ARIH1	25820	ENSG00000166233	15	72474330	72602987	ariadne RBR E3 ubiquitin protein ligase 1	0.0980802	0.0688322	0.154181	0.277042	0.0942574	0.0675601
-0.897938	-0.832999	0.835908	0.895029	ARIH2	10425	ENSG00000177479	3	48918821	48986382	ariadne RBR E3 ubiquitin protein ligase 2	0.291485	0.0648717	7.01418e-06	3.93588e-05	0.283613	0.0644544
-0.199812	1.43834	-0.86853	-0.370001	ARIH2OS		ENSG00000221883	3	48917782	48918823		-0.32364	1.00788	0.748127		-0.0315453	0.317801
-0.464039	-0.969999	0.0784517	1.35559	ARL1	400	ENSG00000120805	12	101393116	101407772	ADP ribosylation factor like GTPase 1	0.0718896	0.0599252	0.230273	0.376387	0.0697202	0.0590263
0.1315	1.32454	-1.0181	-0.437935	ARL10	285598	ENSG00000175414	5	176365487	176401865	ADP ribosylation factor like GTPase 10	-0.293763	0.371078	0.428567	0.589734	-0.136208	0.264403
-0.839573	-0.852117	0.583062	1.10863	ARL13B	200894	ENSG00000169379	3	93980139	94055678	ADP ribosylation factor like GTPase 13B	0.483315	0.115896	3.04296e-05	0.000152805	0.455471	0.115755
0.903387	0.816569	-0.997789	-0.722167	ARL14	80117	ENSG00000179674	3	160677160	160678448	ADP ribosylation factor like GTPase 14	-1.42916	0.157165	9.60427e-20	2.37469e-18	-1.39726	0.158379
-1.35129	-0.114549	0.524869	0.940966	ARL14EP	120534	ENSG00000152219	11	30323104	30338223	ADP ribosylation factor like GTPase 14 effector protein	0.176588	0.103506	0.0879938	0.177572	0.162605	0.100203
1.01194	0.659089	-0.565871	-1.10516	ARL15	54622	ENSG00000185305	5	53883942	54310582	ADP ribosylation factor like GTPase 15	-0.0878549	0.11006	0.424728	0.586478	-0.0792912	0.104905
-0.70684	1.48252	-0.416644	-0.359039	ARL16	339231	ENSG00000214087	17	81681187	81683797	ADP ribosylation factor like GTPase 16	-0.0603772	0.149678	0.686668	0.804651	-0.0501237	0.136962
1.24937	-0.483859	0.292506	-1.05802	ARL17A	51326	ENSG00000185829	17	46516702	46579691	ADP ribosylation factor like GTPase 17A	-0.278045	0.513308	0.588044	0.730809	-0.0837932	0.288327
1.05423	-1.28655	-0.205076	0.437401	ARL17B		ENSG00000228696	17	46274784	46361797		0.0264252	0.978011	0.978444		0.00306412	0.314722
-0.90015	-0.829473	0.919158	0.810465	ARL2	402	ENSG00000213465	11	65014160	65022184	ADP ribosylation factor like GTPase 2	0.235159	0.149078	0.114699	0.219545	0.201182	0.141043
-0.802526	-0.86254	0.496559	1.16851	ARL2BP	23568	ENSG00000102931	16	57245259	57253635	ADP ribosylation factor like GTPase 2 binding protein	0.214725	0.0772319	0.00543145	0.0166448	0.205466	0.0760579
-1.1209	0.0915057	-0.261631	1.29103	ARL3	403	ENSG00000138175	10	102673731	102714397	ADP ribosylation factor like GTPase 3	0.0488136	0.0920428	0.595879	0.736784	0.0454548	0.0888023
-0.77582	-0.951692	0.874629	0.852883	ARL4A	10124	ENSG00000122644	7	12686856	12690958	ADP ribosylation factor like GTPase 4A	0.241206	0.0795102	0.00241617	0.00813592	0.230653	0.0784037
-1.04742	-0.0676051	-0.241463	1.35648	ARL4AP2		ENSG00000248780	4	40786110	40786710		0.838529	1.61485	0.603578		0.0342333	0.328336
0.169899	-0.283078	1.25755	-1.14437	ARL4AP5		ENSG00000218996	6	150934968	150935566		0.0790649	1.12252	0.943847		0.0066365	0.318985
-0.622351	-1.07872	0.817074	0.883992	ARL4C	10123	ENSG00000188042	2	234493041	234497081	ADP ribosylation factor like GTPase 4C	0.121584	0.0592373	0.0401224	0.0930454	0.118084	0.0584675
1.44981	-0.837644	-0.373294	-0.238871	ARL4D	379	ENSG00000175906	17	43398993	43401137	ADP ribosylation factor like GTPase 4D	-0.0546635	0.144281	0.704786	0.817214	-0.0459268	0.132568
-0.935295	-0.793038	0.827101	0.901232	ARL5A	26225	ENSG00000162980	2	151788984	151828492	ADP ribosylation factor like GTPase 5A	0.279346	0.0651614	1.81108e-05	9.44783e-05	0.271578	0.064701
0.130551	-1.42626	0.881643	0.414064	ARL5B	221079	ENSG00000165997	10	18659431	18681639	ADP ribosylation factor like GTPase 5B	0.0971484	0.0760712	0.201577	0.341114	0.0926457	0.0743333
-0.0598481	1.33898	-1.07858	-0.200543	ARL6	84100	ENSG00000113966	3	97764521	97801229	ADP ribosylation factor like GTPase 6	-0.12401	0.151913	0.414315	0.576797	-0.103164	0.139842
0.262264	1.27735	-1.00898	-0.530632	ARL6IP1	23204	ENSG00000170540	16	18791669	18801572	ADP ribosylation factor like GTPase 6 interacting protein 1	-0.0808928	0.0528081	0.125566	0.236339	-0.0797444	0.0522115
0.382156	0.678551	-1.48716	0.426458	ARL6IP4	51329	ENSG00000182196	12	122980060	122982913	ADP ribosylation factor like GTPase 6 interacting protein 4	-0.354321	0.816084	0.664163	0.787702	-0.0507568	0.31257
0.911052	0.814853	-0.771778	-0.954127	ARL6IP5	10550	ENSG00000144746	3	69084937	69106092	ADP ribosylation factor like GTPase 6 interacting protein 5	-0.287643	0.0630237	5.01795e-06	2.89391e-05	-0.280175	0.0626291
-1.35201	0.464808	-0.0867108	0.973912	ARL6IP6	151188	ENSG00000177917	2	152717647	152762396	ADP ribosylation factor like GTPase 6 interacting protein 6	0.0493983	0.0904976	0.585168	0.728397	0.046106	0.0874296
0.391746	1.16714	-0.412529	-1.14636	ARL8A	127829	ENSG00000143862	1	202133404	202144743	ADP ribosylation factor like GTPase 8A	-0.390818	0.147852	0.00820995	0.0237973	-0.346237	0.145252
-1.39259	-0.030102	0.556818	0.865875	ARL8B	55207	ENSG00000134108	3	5122249	5180911	ADP ribosylation factor like GTPase 8B	0.0972248	0.0710392	0.171122	0.300243	0.0931953	0.0696576
-0.224294	-1.3233	0.750796	0.796795	ARL9	132946	ENSG00000196503	4	56505209	56524959	ADP ribosylation factor like GTPase 9	0.728411	1.04564	0.486041		0.068797	0.326306
-0.975805	-0.744655	0.941789	0.778671	ARMC1	55156	ENSG00000104442	8	65602458	65634217	armadillo repeat containing 1	0.384334	0.0774256	6.90875e-07	4.57006e-06	0.371995	0.0771491
-1.10113	-0.593159	0.833667	0.860623	ARMC10	83787	ENSG00000170632	7	103074881	103099759	armadillo repeat containing 10	0.36577	0.0842033	1.39982e-05	7.47257e-05	0.351397	0.0837524
-0.60339	-1.08695	0.958819	0.731522	ARMC10P1		ENSG00000178660	3	94506766	94507620		0.918208	0.708269	0.194834	0.33209	0.187515	0.361808
1.17069	-0.703569	-0.94958	0.482454	ARMC12	221481	ENSG00000157343	6	35737032	35749079	armadillo repeat containing 12	-0.232065	2.03856	0.909366		-0.00602082	0.328261
-1.4037	0.0833124	0.934948	0.385437	ARMC2	84071	ENSG00000118690	6	108848416	108974476	armadillo repeat containing 2	0.267182	0.376839	0.478318	0.635443	0.121349	0.263215
-0.618118	1.42624	-0.0454208	-0.762699	ARMC5	79798	ENSG00000140691	16	31458080	31467166	armadillo repeat containing 5	-0.0702118	0.196282	0.720561	0.827861	-0.0519727	0.169943
-0.773511	-0.952617	0.815939	0.910189	ARMC6	93436	ENSG00000105676	19	19033575	19060311	armadillo repeat containing 6	0.632969	0.119402	1.15068e-07	8.51908e-07	0.603748	0.120056
1.29852	0.237998	-0.964178	-0.572338	ARMC7	79637	ENSG00000125449	17	75109952	75130272	armadillo repeat containing 7	-0.19316	0.123111	0.116649	0.222513	-0.172097	0.117722
-1.1995	-0.42025	1.00065	0.619098	ARMC8	25852	ENSG00000114098	3	138187248	138298384	armadillo repeat containing 8	0.180648	0.0992295	0.0686814	0.145163	0.167494	0.0963643
0.29146	0.518381	0.671744	-1.48158	ARMC9	80210	ENSG00000135931	2	231198546	231376848	armadillo repeat containing 9	-0.0897134	0.131457	0.494953	0.650733	-0.0775918	0.122963
0.725439	0.693832	-0.00779157	-1.41148	ARMCX2	9823	ENSG00000184867	X	101655281	101659850	armadillo repeat containing X-linked 2	-0.430064	0.217187	0.0476859	0.10745	-0.334777	0.207913
1.28362	0.280301	-0.94138	-0.622541	ARMCX3	51566	ENSG00000102401	X	101622797	101627843	armadillo repeat containing X-linked 3	-0.239666	0.0923109	0.00942371	0.0269098	-0.225465	0.0904977
0.370303	-1.38048	0.977807	0.0323695	ARMCX4	100131755	ENSG00000196440	X	101418287	101533459	armadillo repeat containing X-linked 4	0.16919	0.279426	0.544852	0.69496	0.101452	0.219749
1.13675	-0.335924	-1.19863	0.397803	ARMCX5	64860	ENSG00000125962	X	102599168	102604159	armadillo repeat containing X-linked 5	-0.0219846	0.139493	0.874769	0.931615	-0.018551	0.128649
1.04189	-0.287002	-1.25698	0.502091	ARMCX5-GPRASP2		ENSG00000271147	X	102599512	102714671		-0.0945109	0.251197	0.706737	0.818859	-0.06031	0.202048
-1.36584	0.498057	0.938816	-0.0710343	ARMCX5-GPRASP2	100528062	ENSG00000286237	X	102712495	102753530	ARMCX5-GPRASP2 readthrough	1.13256	1.75168	0.517919		0.038131	0.330223
-0.758304	-0.878061	0.421233	1.21513	ARMCX6	54470	ENSG00000198960	X	101615118	101618001	armadillo repeat containing X-linked 6	0.266309	0.18612	0.152475	0.274652	0.211559	0.17181
1.20813	0.368929	-1.07204	-0.505025	ARMH1	339541	ENSG00000198520	1	44674692	44725591	armadillo like helical domain containing 1	-1.40953	1.18086	0.232617		-0.109422	0.344989
-0.962071	-0.493377	1.34895	0.106501	ARMH3	79591	ENSG00000120029	10	101845599	102056193	armadillo like helical domain containing 3	0.207418	0.107626	0.053954	0.119009	0.190404	0.104363
-0.301832	-1.05899	0.0240844	1.33674	ARMH4	145407	ENSG00000139971	14	57999735	58298139	armadillo like helical domain containing 4	0.409883	0.419828	0.32891	0.490844	0.170877	0.290955
-1.14519	-0.264336	0.145621	1.26391	ARMT1	79624	ENSG00000146476	6	151452258	151470101	acidic residue methyltransferase 1	0.120053	0.0809656	0.138135	0.254975	0.11376	0.0790305
-0.273485	0.587935	-1.28197	0.967519	ARNILA		ENSG00000235072	2	25369136	25375845		0.269733	2.12902	0.899183		0.00648563	0.328695
1.24647	0.312075	-1.0385	-0.520042	ARNT	405	ENSG00000143437	1	150809713	150876708	aryl hydrocarbon receptor nuclear translocator	-0.162207	0.105679	0.124806	0.235233	-0.148474	0.101869
-1.07605	-0.616973	0.965423	0.727605	ARNT2	9915	ENSG00000172379	15	80404350	80597933	aryl hydrocarbon receptor nuclear translocator 2	0.217116	0.106448	0.0413861	0.0954123	0.199876	0.10341
0.0340863	1.25872	-1.18436	-0.108449	ARNTL	406	ENSG00000133794	11	13276652	13387266	basic helix-loop-helix ARNT like 1	-0.160059	0.165805	0.334373	0.496559	-0.129823	0.151505
0.830353	0.900768	-0.884791	-0.846331	ARNTL2	56938	ENSG00000029153	12	27332836	27425289	basic helix-loop-helix ARNT like 2	-0.49713	0.0731762	1.09367e-11	1.35423e-10	-0.485688	0.0732039
0.691832	1.00339	-1.04469	-0.650534	ARPC1A	10552	ENSG00000241685	7	99325898	99366262	actin related protein 2/3 complex subunit 1A	-0.54248	0.111425	1.1241e-06	7.18214e-06	-0.516076	0.11168
0.873482	0.82968	-1.07326	-0.629904	ARPC1B	10095	ENSG00000130429	7	99374249	99394816	actin related protein 2/3 complex subunit 1B	-0.145439	0.139675	0.297751	0.456503	-0.124719	0.13062
0.627728	0.675249	-1.45806	0.155085	ARPC2	10109	ENSG00000163466	2	218217141	218254356	actin related protein 2/3 complex subunit 2	-0.0578331	0.0519497	0.265601	0.419307	-0.0564361	0.0513506
-0.750852	-0.846146	0.326769	1.27023	ARPC3	10094	ENSG00000111229	12	110434823	110450422	actin related protein 2/3 complex subunit 3	0.277489	0.0672172	3.65539e-05	0.000180819	0.269332	0.0666873
-1.441	0.480948	0.139917	0.820137	ARPC3P1		ENSG00000226284	20	49134480	49135012		0.379691	1.73627	0.826897		0.0134885	0.32707
1.28523	-0.735626	-0.847518	0.297914	ARPC3P3		ENSG00000256745	11	94188449	94188997		-0.552643	1.08255	0.609702		-0.0485078	0.322419
-1.01518	-0.63194	0.496773	1.15034	ARPC4	10093	ENSG00000241553	3	9792495	9807101	actin related protein 2/3 complex subunit 4	0.111786	0.0773017	0.148148	0.268775	0.106365	0.0755698
1.24788	0.368592	-0.793506	-0.822968	ARPC4-TTLL3	100526693	ENSG00000250151	3	9793082	9835401	ARPC4-TTLL3 readthrough	-0.970685	1.03532	0.348466		-0.0941268	0.334267
0.915361	0.813198	-0.805682	-0.922876	ARPC5	10092	ENSG00000162704	1	183620846	183635783	actin related protein 2/3 complex subunit 5	-0.195162	0.0580394	0.000772169	0.00292654	-0.189229	0.0575038
-0.840793	-0.419745	-0.182874	1.44341	ARPC5L	81873	ENSG00000136950	9	124862130	124877733	actin related protein 2/3 complex subunit 5 like	0.150494	0.092082	0.102186	0.200069	0.140694	0.0894789
-1.47211	0.226431	0.676508	0.569172	ARPIN	348110	ENSG00000242498	15	89895006	89912952	actin related protein 2/3 complex inhibitor	0.0692707	0.0998608	0.487888	0.644436	0.0637251	0.0958881
-0.85609	-0.800667	0.472275	1.18448	ARPIN-AP3S2	100526783	ENSG00000250021	15	89834308	89912882	ARPIN-AP3S2 readthrough	1.11687	1.11034	0.314474		0.0955876	0.337298
-0.435883	-1.15102	1.12963	0.45727	ARPP19	10776	ENSG00000128989	15	52547045	52569883	cAMP regulated phosphoprotein 19	0.0925761	0.0541745	0.0874785	0.176853	0.0903103	0.0535392
-0.658443	-1.04946	0.796383	0.911518	ARRB1	408	ENSG00000137486	11	75260122	75351705	arrestin beta 1	0.490361	0.0799576	8.6363e-10	8.58505e-09	0.476858	0.0799307
-0.73715	-0.855857	0.319384	1.27362	ARRB2	409	ENSG00000141480	17	4710596	4721499	arrestin beta 2	0.501474	0.146436	0.000615886	0.00238344	0.456115	0.146108
0.636338	1.04794	-1.04026	-0.644023	ARRDC1	92714	ENSG00000197070	9	137605685	137615360	arrestin domain containing 1	-0.237545	0.0865636	0.00606635	0.0183451	-0.22505	0.0851102
-1.02504	-0.0545287	-0.285927	1.36549	ARRDC1-AS1	85026	ENSG00000203993	9	137615326	137618906	ARRDC1 antisense RNA 1	0.289776	0.369132	0.432442	0.592561	0.135929	0.263645
0.613826	1.08385	-0.909767	-0.787911	ARRDC2	27106	ENSG00000105643	19	18001132	18014102	arrestin domain containing 2	-0.311709	0.122567	0.010985	0.0308258	-0.283107	0.119825
-0.538063	-1.13233	0.96403	0.706367	ARRDC3	57561	ENSG00000113369	5	91368631	91383317	arrestin domain containing 3	0.320781	0.0880437	0.000269035	0.00112503	0.305819	0.087141
-0.291725	-1.26346	0.54387	1.01132	ARRDC3-AS1	100129716	ENSG00000281357	5	91380349	91612566	ARRDC3 antisense RNA 1	0.179459	0.578108	0.756238	0.852142	0.0452685	0.291247
0.941771	0.786799	-0.85995	-0.86862	ARRDC4	91947	ENSG00000140450	15	97960703	97973833	arrestin domain containing 4	-0.916414	0.0802703	3.4548e-30	1.66611e-28	-0.905136	0.0805361
-1.48526	0.344749	0.681512	0.459002	ARSA	410	ENSG00000100299	22	50622754	50628173	arylsulfatase A	0.0689563	0.210642	0.743393	0.844627	0.0496059	0.178857
-1.09413	-0.266299	0.0451578	1.31527	ARSB	411	ENSG00000113273	5	78777209	78986087	arylsulfatase B	0.250817	0.183929	0.172674	0.302388	0.199401	0.169342
0.968376	0.71131	-0.570014	-1.10967	ARSD	414	ENSG00000006756	X	2903972	2929349	arylsulfatase D	-0.398386	0.128791	0.00197964	0.00681626	-0.36409	0.127298
-1.48929	0.459639	0.657376	0.372279	ARSG	22901	ENSG00000141337	17	68259182	68422731	arylsulfatase G	0.307712	0.356714	0.388342	0.551885	0.1505	0.262746
0.225464	1.31799	-0.669399	-0.874055	ARSH	347527	ENSG00000205667	X	3006546	3034111	arylsulfatase family member H	-1.86326	0.93587	0.046487	0.105098	-0.266561	0.464836
-0.806567	1.44194	-0.132744	-0.502629	ARSI	340075	ENSG00000183876	5	150296343	150339307	arylsulfatase family member I	-0.60217	2.27847	0.791559		-0.0123334	0.329483
-1.16898	1.2564	0.116161	-0.203576	ARSJ	79642	ENSG00000180801	4	113900284	113979727	arylsulfatase family member J	-0.00461969	0.232573	0.984152	0.991023	-0.00282203	0.190772
-0.652455	-0.995178	1.1604	0.487234	ARSK	153642	ENSG00000164291	5	95555101	95605102	arylsulfatase family member K	0.261026	0.152669	0.0873126	0.176586	0.222951	0.144967
-0.315998	1.35542	-0.00843743	-1.03098	ARSL	415	ENSG00000157399	X	2934045	2968475	arylsulfatase L	-0.102043	0.161895	0.528494	0.680466	-0.0827621	0.146917
0.181593	-0.762437	-0.762437	1.34328	ART3	419	ENSG00000156219	4	76011184	76112802	ADP-ribosyltransferase 3 (inactive)	2.03683	2.82473	0.470866		0.0282977	0.332395
-0.0816775	-1.20603	1.23956	0.0481411	ART5	116969	ENSG00000167311	11	3638512	3642316	ADP-ribosyltransferase 5	2.24545	2.53017	0.374827		0.0385929	0.333366
-1.30077	0.608971	0.9366	-0.244799	ARTN	9048	ENSG00000117407	1	43933320	43937240	artemin	0.328743	0.451852	0.466892	0.625078	0.11988	0.285205
-0.585042	-1.06021	0.522405	1.12284	ARV1	64801	ENSG00000173409	1	230978981	231000733	ARV1 homolog, fatty acid homeostasis modulator	0.276828	0.125036	0.0268299	0.066338	0.2495	0.121273
-1.00494	-0.649873	1.1425	0.512306	ARVCF	421	ENSG00000099889	22	19969896	20016823	ARVCF delta catenin family member	0.375554	0.162733	0.0210106	0.0538028	0.323175	0.158278
0.45394	1.10886	-0.367155	-1.19564	ASAH1	427	ENSG00000104763	8	18055992	18084998	N-acylsphingosine amidohydrolase 1	-0.154703	0.0630696	0.0141711	0.038437	-0.149897	0.0622603
1.19126	-1.24694	0.138459	-0.0827801	ASAH1-AS1	101929066	ENSG00000245281	8	18084386	18097644	ASAH1 antisense RNA 1	-0.132583	0.977491	0.892109	0.942319	-0.0135815	0.314987
0.367652	-0.0820515	-1.32967	1.04407	ASAH2	56624	ENSG00000188611	10	50182778	50279720	N-acylsphingosine amidohydrolase 2	-0.0511011	0.373973	0.891312	0.941797	-0.0222649	0.248777
1.28919	0.177886	-1.0728	-0.39428	ASAH2B	653308	ENSG00000204147	10	50739318	50816495	N-acylsphingosine amidohydrolase 2B	-0.0678315	0.187976	0.71821	0.826443	-0.0514346	0.164303
1.11209	0.557813	-1.00496	-0.664943	ASAP1	50807	ENSG00000153317	8	130052104	130443674	ArfGAP with SH3 domain, ankyrin repeat and PH domain 1	-0.390296	0.0954529	4.33452e-05	0.000211459	-0.371372	0.0948372
0.994936	0.725344	-0.81379	-0.90649	ASAP2	8853	ENSG00000151693	2	9206765	9405683	ArfGAP with SH3 domain, ankyrin repeat and PH domain 2	-0.532459	0.0614579	4.56296e-18	1.0183e-16	-0.524458	0.0615001
0.798913	0.927176	-0.941756	-0.784333	ASAP3	55616	ENSG00000088280	1	23428563	23484568	ArfGAP with SH3 domain, ankyrin repeat and PH domain 3	-0.963394	0.218036	9.93885e-06	5.45708e-05	-0.879055	0.223856
-0.295917	-0.280755	-0.86651	1.44318	ASB1	51665	ENSG00000065802	2	238426742	238452250	ankyrin repeat and SOCS box containing 1	0.0213533	0.0919701	0.816401	0.893932	0.0199238	0.0886475
-0.49131	1.46569	-0.747636	-0.226743	ASB12	142689	ENSG00000198881	X	64224194	64230607	ankyrin repeat and SOCS box containing 12	-1.05989	1.76891	0.549055		-0.0359134	0.329761
-1.05757	-0.63003	0.669719	1.01788	ASB13	79754	ENSG00000196372	10	5638867	5666595	ankyrin repeat and SOCS box containing 13	0.384018	0.0955026	5.79459e-05	0.000277218	0.365322	0.0949277
1.06744	0.545989	-1.16788	-0.445554	ASB14	142686	ENSG00000239388	3	57268342	57292685	ankyrin repeat and SOCS box containing 14	-0.762224	1.14394	0.505209		-0.0602558	0.32669
-0.200163	-1.33115	0.677591	0.853723	ASB16	92591	ENSG00000161664	17	44170447	44179084	ankyrin repeat and SOCS box containing 16	2.46933	2.39456	0.302434		0.0477869	0.334798
-0.420675	-0.721462	1.47944	-0.337306	ASB16-AS1	339201	ENSG00000267080	17	44175968	44186723	ASB16 antisense RNA 1	0.381422	0.429595	0.374613	0.538069	0.15228	0.288247
0.615382	0.759696	0.0536581	-1.42874	ASB2	51676	ENSG00000100628	14	93934166	93976739	ankyrin repeat and SOCS box containing 2	-2.14536	2.40761	0.372891		-0.0397521	0.333059
-0.976227	1.16416	0.486568	-0.674505	ASB3		ENSG00000115239	2	53532672	53860160		-0.0142784	0.132414	0.914129	0.955864	-0.0121763	0.123145
-0.819174	-0.910348	0.912712	0.816809	ASB4	51666	ENSG00000005981	7	95478444	95540233	ankyrin repeat and SOCS box containing 4	2.01629	0.328534	8.39736e-10	8.36353e-09	1.91069	0.335677
0.401047	1.22681	-0.746367	-0.881493	ASB6	140459	ENSG00000148331	9	129634604	129642169	ankyrin repeat and SOCS box containing 6	-0.106384	0.119119	0.371806	0.535171	-0.0945101	0.112895
1.0692	0.524702	-1.19144	-0.402459	ASB7	140460	ENSG00000183475	15	100602589	100651701	ankyrin repeat and SOCS box containing 7	-0.246637	0.115238	0.0323349	0.0776565	-0.224575	0.111785
1.0468	0.656984	-0.954737	-0.749043	ASB8	140461	ENSG00000177981	12	48147789	48181213	ankyrin repeat and SOCS box containing 8	-0.246107	0.105894	0.0201211	0.0518488	-0.227323	0.103258
-0.045766	1.33366	-1.08549	-0.20241	ASB9	140462	ENSG00000102048	X	15235288	15270467	ankyrin repeat and SOCS box containing 9	-0.269379	0.168204	0.109267	0.211119	-0.222256	0.158125
0.955487	0.761736	-0.985843	-0.731379	ASCC1	51008	ENSG00000138303	10	72096032	72217134	activating signal cointegrator 1 complex subunit 1	-0.345603	0.114015	0.00243589	0.00819699	-0.319733	0.112328
0.222734	1.05697	-1.35203	0.0723295	ASCC2	84164	ENSG00000100325	22	29788609	29838304	activating signal cointegrator 1 complex subunit 2	-0.0751924	0.0917985	0.412728	0.575101	-0.0698883	0.0886915
-0.746262	-0.939599	1.10673	0.579128	ASCC3	10973	ENSG00000112249	6	100508194	100881372	activating signal cointegrator 1 complex subunit 3	0.359037	0.0621168	7.46903e-09	6.50336e-08	0.351219	0.0619195
-0.983261	-0.738129	0.918877	0.802514	ASCL2	430	ENSG00000183734	11	2268498	2270588	achaete-scute family bHLH transcription factor 2	1.33176	0.200284	2.94376e-11	3.46075e-10	1.27663	0.203866
-1.40462	0.646065	-0.0219388	0.780492	ASCL5	647219	ENSG00000232237	1	201113943	201127184	achaete-scute family bHLH transcription factor 5	0.230923	0.524413	0.659687	0.784447	0.0668674	0.287158
-0.782776	-0.936429	0.732071	0.987134	ASF1A	25842	ENSG00000111875	6	118894152	118909171	anti-silencing function 1A histone chaperone	0.31308	0.115744	0.00683187	0.0203092	0.287861	0.113464
-0.772241	-0.952551	0.795916	0.928875	ASF1B	55723	ENSG00000105011	19	14119512	14136613	anti-silencing function 1B histone chaperone	0.551207	0.0835534	4.19383e-11	4.8212e-10	0.536585	0.0836736
-1.29438	0.575285	0.965799	-0.246706	ASGR1	432	ENSG00000141505	17	7173431	7179564	asialoglycoprotein receptor 1	0.421045	1.30983	0.74787		0.0254402	0.323843
0.597622	-1.22083	1.00378	-0.380577	ASH1L	55870	ENSG00000116539	1	155335268	155563162	ASH1 like histone lysine methyltransferase	0.0800042	0.152514	0.599882	0.739565	0.0663187	0.139312
-0.369421	-1.1373	0.287009	1.21971	ASH1L-AS1	645676	ENSG00000235919	1	155562026	155563944	ASH1L antisense RNA 1	0.663512	0.494917	0.180033	0.312326	0.242636	0.348628
-1.29799	0.672137	-0.264837	0.890687	ASH2L	9070	ENSG00000129691	8	38105493	38144076	ASH2 like, histone lysine methyltransferase complex subunit	0.0551911	0.100943	0.584546	0.727855	0.0506348	0.09677
-0.936279	-0.792715	0.876194	0.8528	ASIC1	41	ENSG00000110881	12	50057548	50083611	acid sensing ion channel subunit 1	0.482825	0.114486	2.47222e-05	0.000126469	0.455537	0.114401
-0.949347	-0.778109	0.888573	0.838883	ASIC2	40	ENSG00000108684	17	33013087	34174964	acid sensing ion channel subunit 2	2.92293	0.499045	4.71169e-09	4.20837e-08	2.74856	0.511557
0.442011	0.743876	0.28686	-1.47275	ASIC3	9311	ENSG00000213199	7	151048292	151052756	acid sensing ion channel subunit 3	-0.334311	0.895282	0.70884	0.820022	-0.0403873	0.31486
1.38764	0.0483982	-0.861215	-0.574823	ASIC4	55515	ENSG00000072182	2	219514170	219538772	acid sensing ion channel subunit family member 4	-1.05811	1.37057	0.440101		-0.0599426	0.33076
1.01666	0.57995	-1.2199	-0.376708	ASL	435	ENSG00000126522	7	66075800	66094697	argininosuccinate lyase	-0.357107	0.15105	0.018071	0.0474531	-0.312318	0.146894
-1.08143	-0.534886	0.463088	1.15323	ASMTL	8623	ENSG00000169093	X	1403139	1453762	acetylserotonin O-methyltransferase like	0.250875	0.143707	0.0808562	0.165876	0.217613	0.13707
-0.836406	-0.521263	1.42284	-0.0651681	ASMTL-AS1		ENSG00000236017	X	1401769	1414028		1.09566	0.920225	0.233793	0.380742	0.134951	0.348505
0.967658	0.740561	-0.686473	-1.02175	ASNS	440	ENSG00000070669	7	97851677	97872542	asparagine synthetase (glutamine-hydrolyzing)	-2.74798	0.358694	1.84416e-14	3.04628e-13	-2.6533	0.364011
-0.91636	-0.809264	0.953613	0.77201	ASNSD1	54529	ENSG00000138381	2	189661385	189670831	asparagine synthetase domain containing 1	0.288806	0.0823811	0.000455363	0.00181133	0.276295	0.08149
0.396439	-0.141091	1.0535	-1.30884	ASPA	443	ENSG00000108381	17	3472374	3503405	aspartoacylase	0.000599495	1.15656	0.999586		0.000322747	0.31966
0.966337	0.757847	-0.809863	-0.914321	ASPH	444	ENSG00000198363	8	61500556	61714640	aspartate beta-hydroxylase	-0.326858	0.0466272	2.38258e-12	3.20496e-11	-0.322755	0.0465146
-0.832473	-0.785848	0.373298	1.24502	ASPHD1	253982	ENSG00000174939	16	29900375	29919864	aspartate beta-hydroxylase domain containing 1	0.481454	0.293795	0.101266	0.198694	0.312559	0.267049
1.35498	0.15435	-0.73032	-0.779005	ASPHD2	57168	ENSG00000128203	22	26429260	26445015	aspartate beta-hydroxylase domain containing 2	-0.507063	0.188968	0.00728928	0.0214966	-0.431275	0.187272
-0.619849	-0.870301	1.35667	0.133483	ASPM	259266	ENSG00000066279	1	197084121	197146694	assembly factor for spindle microtubules	0.165971	0.0726264	0.0222973	0.0566505	0.159271	0.0714286
-1.44329	0.113494	0.764569	0.565223	ASPSCR1	79058	ENSG00000169696	17	81976807	82017406	ASPSCR1 tether for SLC2A4, UBX domain containing	0.0653105	0.154616	0.672731	0.794596	0.0539808	0.140728
-0.802469	-0.893471	0.603379	1.09256	ASRGL1	80150	ENSG00000162174	11	62337448	62393412	asparaginase and isoaspartyl peptidase 1	0.772159	0.125512	7.64767e-10	7.66095e-09	0.742062	0.126536
0.926739	0.801595	-0.91433	-0.814004	ASS1	445	ENSG00000130707	9	130444961	130501274	argininosuccinate synthase 1	-2.77666	0.0851978	5.54778e-233	4.32089e-229	-2.7715	0.085201
-1.33373	-0.0753925	0.370911	1.03822	ASTE1	28990	ENSG00000034533	3	131013875	131027649	asteroid homolog 1	0.150677	0.184489	0.414086	0.576657	0.116928	0.164676
-0.311682	0.478385	-1.23663	1.06993	ASTL	431705	ENSG00000188886	2	96122818	96138502	astacin like metalloendopeptidase	0.591786	2.03501	0.771203		0.0153941	0.32879
-1.03332	-0.645288	0.607999	1.07061	ASTN2	23245	ENSG00000148219	9	116423112	117415070	astrotactin 2	0.301101	0.224103	0.179084	0.311255	0.21965	0.201339
-0.629234	-0.99056	1.20423	0.415568	ASXL1	171023	ENSG00000171456	20	32358330	32439319	ASXL transcriptional regulator 1	0.216584	0.0719046	0.00259443	0.00864642	0.208503	0.0709775
-0.306809	-1.15025	1.23907	0.217987	ASXL2	55252	ENSG00000143970	2	25733753	25878487	ASXL transcriptional regulator 2	0.201352	0.0724255	0.00543379	0.0166486	0.193554	0.0713929
1.12352	0.0858162	0.102109	-1.31145	ATAD1	84896	ENSG00000138138	10	87751512	87841361	ATPase family AAA domain containing 1	-0.0591199	0.0720838	0.412127	0.574672	-0.0564177	0.0705104
-1.14061	-0.477339	1.09383	0.524113	ATAD2	29028	ENSG00000156802	8	123319850	123416350	ATPase family AAA domain containing 2	0.279838	0.0682976	4.17937e-05	0.000204402	0.27131	0.067789
1.47582	-0.296737	-0.450286	-0.728797	ATAD2B	54454	ENSG00000119778	2	23748664	23927123	ATPase family AAA domain containing 2B	-0.135487	0.0978981	0.166372	0.293727	-0.125257	0.0945778
-0.986876	-0.676696	0.528124	1.13545	ATAD3A	55210	ENSG00000197785	1	1512162	1534685	ATPase family AAA domain containing 3A	0.714294	0.122185	5.03477e-09	4.47385e-08	0.68481	0.123176
-0.885744	-0.839542	0.756995	0.96829	ATAD3B	83858	ENSG00000160072	1	1471765	1497848	ATPase family AAA domain containing 3B	0.566098	0.0996153	1.32471e-08	1.12086e-07	0.54532	0.0998875
1.35086	0.152937	-0.649234	-0.854564	ATAD3C	219293	ENSG00000215915	1	1449689	1470163	ATPase family AAA domain containing 3C	-0.687561	0.675337	0.30863	0.469119	-0.144102	0.33261
-0.883069	-0.791501	1.14682	0.527751	ATAD5	79915	ENSG00000176208	17	30831966	30895869	ATPase family AAA domain containing 5	0.564934	0.108089	1.72709e-07	1.25163e-06	0.540539	0.108481
0.879007	0.771343	-0.45738	-1.19297	ATAT1	79969	ENSG00000137343	6	30626842	30646823	alpha tubulin acetyltransferase 1	-0.479057	0.194996	0.01402	0.0380803	-0.398956	0.191912
-0.944951	-0.772916	0.72829	0.989577	ATE1	11101	ENSG00000107669	10	121709393	121928801	arginyltransferase 1	0.25382	0.0804145	0.00159733	0.00562296	0.24274	0.0793627
1.40057	-0.0635083	-0.403499	-0.933567	ATE1-AS1	100130887	ENSG00000226864	10	121928056	121952139	ATE1 antisense RNA 1	-0.503917	0.744164	0.498305	0.65387	-0.0861492	0.316419
-0.254126	-1.08838	0.0194519	1.32305	ATF1	466	ENSG00000123268	12	50763710	50821162	activating transcription factor 1	0.0846882	0.0845573	0.316562	0.477494	0.0797928	0.0821287
-0.937627	-0.723069	1.16131	0.499386	ATF2	1386	ENSG00000115966	2	175072250	175168382	activating transcription factor 2	0.120636	0.0716904	0.0924255	0.184683	0.115631	0.0703456
0.870366	0.858634	-0.79207	-0.936929	ATF3	467	ENSG00000162772	1	212565334	212620777	activating transcription factor 3	-1.15207	0.0704072	3.51579e-60	5.70473e-58	-1.14457	0.0705815
0.694929	1.01713	-0.948127	-0.763928	ATF4	468	ENSG00000128272	22	39519695	39522683	activating transcription factor 4	-0.699952	0.0592208	3.10027e-32	1.71252e-30	-0.692956	0.0593338
0.489454	0.68351	-1.4824	0.309432	ATF4P3		ENSG00000228218	17	76225751	76226806		-0.616367	1.19983	0.607453		-0.0442835	0.32447
1.01733	0.683339	-0.689139	-1.01153	ATF4P4		ENSG00000256167	11	113789231	113791366		-1.41442	1.97011	0.472795		-0.0395411	0.331407
-1.07118	-0.475496	0.309444	1.23723	ATF5	22809	ENSG00000169136	19	49928702	49933935	activating transcription factor 5	0.360519	0.108192	0.000861569	0.00323156	0.337134	0.107025
0.302335	-0.934997	-0.641334	1.274	ATF6	22926	ENSG00000118217	1	161766298	161977574	activating transcription factor 6	0.00531228	0.0705107	0.939944	0.969701	0.00512881	0.0689734
0.938628	-0.0202758	0.461932	-1.38028	ATF6-DT		ENSG00000226889	1	161765325	161766227		-1.19719	2.10772	0.570032		-0.0288473	0.330446
0.705857	1.01249	-0.847527	-0.870821	ATF6B	1388	ENSG00000213676	6	32115264	32128253	activating transcription factor 6 beta	-0.166537	0.0965111	0.0844245	0.171906	-0.154534	0.0936942
0.87443	-1.3216	0.664479	-0.217313	ATF7	11016	ENSG00000170653	12	53507856	53626410	activating transcription factor 7	0.0112392	0.0774448	0.884612	0.938026	0.010727	0.0754154
1.0458	0.476075	-0.250255	-1.27162	ATF7IP	55729	ENSG00000171681	12	14365676	14502931	activating transcription factor 7 interacting protein	-0.199531	0.0755189	0.00823868	0.0238672	-0.19102	0.0743468
-0.800907	-0.676279	0.102136	1.37505	ATF7IP2	80063	ENSG00000166669	16	10326434	10483638	activating transcription factor 7 interacting protein 2	0.302693	0.142999	0.0342816	0.0815523	0.265664	0.138047
-1.01723	-0.517388	1.27723	0.257389	ATG10	83734	ENSG00000152348	5	81972023	82276857	autophagy related 10	0.189966	0.182861	0.298873	0.457818	0.148962	0.165311
-1.31492	0.0905987	0.105556	1.11877	ATG101	60673	ENSG00000123395	12	52069246	52077495	autophagy related 101	0.186618	0.109245	0.0875906	0.177006	0.170089	0.105501
1.07066	0.576654	-0.537	-1.11031	ATG12	9140	ENSG00000145782	5	115828200	115841837	autophagy related 12	-0.104041	0.0810123	0.199049	0.337424	-0.0983706	0.0789769
0.907843	0.822997	-0.882612	-0.848229	ATG13	9776	ENSG00000175224	11	46617527	46674818	autophagy related 13	-0.368121	0.0823526	7.81981e-06	4.35251e-05	-0.354189	0.0819017
0.896574	0.422135	0.0984256	-1.41713	ATG14	22863	ENSG00000126775	14	55366391	55411830	autophagy related 14	-0.0558521	0.13678	0.683027	0.801998	-0.0476939	0.126779
-0.792582	0.697018	-0.922118	1.01768	ATG16L1	55054	ENSG00000085978	2	233210051	233295674	autophagy related 16 like 1	0.00255173	0.0755009	0.973039	0.985613	0.00284501	0.0736322
0.771198	0.704691	-0.097811	-1.37808	ATG16L2	89849	ENSG00000168010	11	72814406	72843674	autophagy related 16 like 2	-0.193247	0.217563	0.374415	0.537881	-0.138359	0.1886
1.12743	0.556964	-0.849224	-0.835171	ATG2A	23130	ENSG00000110046	11	64894546	64917211	autophagy related 2A	-0.19481	0.106524	0.0674323	0.142891	-0.178685	0.103095
1.36259	-0.0372738	-0.299523	-1.02579	ATG2B	55102	ENSG00000066739	14	96279195	96363341	autophagy related 2B	-0.24273	0.101569	0.0168572	0.044642	-0.225687	0.0991915
-1.33193	-0.179821	0.915451	0.5963	ATG3	64422	ENSG00000144848	3	112532510	112562046	autophagy related 3	0.233685	0.0857209	0.00640852	0.0192194	0.221731	0.0843303
0.799604	0.799895	-1.26964	-0.329854	ATG4A	115201	ENSG00000101844	X	108091668	108154671	autophagy related 4A cysteine peptidase	-0.193815	0.1524	0.203461	0.343557	-0.163062	0.142244
-0.681367	1.01601	-1.01805	0.683405	ATG4B	23192	ENSG00000168397	2	241637213	241673857	autophagy related 4B cysteine peptidase	-0.00965703	0.0815018	0.905681	0.950347	-0.00903937	0.07917
-0.914021	-0.774444	0.580277	1.10819	ATG4C	84938	ENSG00000125703	1	62784132	62865516	autophagy related 4C cysteine peptidase	0.160453	0.117736	0.172938	0.302708	0.143831	0.112508
0.38526	1.23674	-0.753605	-0.8684	ATG4D	84971	ENSG00000130734	19	10543895	10553418	autophagy related 4D cysteine peptidase	-0.135116	0.120875	0.263643	0.4171	-0.120013	0.114817
-0.494863	-1.03951	1.26587	0.268502	ATG5	9474	ENSG00000057663	6	106045423	106325791	autophagy related 5	0.0802004	0.0753198	0.286967	0.444608	0.0763943	0.0735935
0.446456	1.19633	-0.721131	-0.921653	ATG7	10533	ENSG00000197548	3	11272309	11557665	autophagy related 7	-0.319008	0.123615	0.00986117	0.0280101	-0.289808	0.120986
1.2109	0.356949	-0.486232	-1.08162	ATG9A	79065	ENSG00000198925	2	219219380	219229717	autophagy related 9A	-0.155725	0.0921928	0.0911967	0.18271	-0.145439	0.0896162
1.41925	-0.237262	-0.251227	-0.930762	ATG9B	285973	ENSG00000181652	7	151012209	151024499	autophagy related 9B	-0.761404	0.668286	0.254562	0.406282	-0.166048	0.343145
-0.929715	-0.795408	0.77615	0.948972	ATIC	471	ENSG00000138363	2	215311956	215349773	5-aminoimidazole-4-carboxamide ribonucleotide formyltransferase/IMP cyclohydrolase	0.43373	0.056704	2.02522e-14	3.33476e-13	0.427091	0.0566633
1.12068	0.542603	-1.01386	-0.649424	ATL1	51062	ENSG00000198513	14	50532509	50634017	atlastin GTPase 1	-0.593663	0.311396	0.0565914	0.123775	-0.390971	0.297163
-0.896416	-0.817338	1.02997	0.683787	ATL2	64225	ENSG00000119787	2	38293954	38377285	atlastin GTPase 2	0.153903	0.05809	0.00806377	0.0234389	0.14981	0.0574472
0.769627	0.954667	-0.931748	-0.792546	ATL3	25923	ENSG00000184743	11	63624087	63671921	atlastin GTPase 3	-0.386035	0.0646295	2.32873e-09	2.18654e-08	-0.377308	0.0644716
0.0308018	-1.35848	1.03276	0.294917	ATM	472	ENSG00000149311	11	108223044	108369102	ATM serine/threonine kinase	0.345155	0.210502	0.101073	0.198414	0.265352	0.195691
-1.10111	-0.483873	1.17806	0.406927	ATMIN	23300	ENSG00000166454	16	81035842	81047350	ATM interactor	0.062931	0.0688814	0.36092	0.523968	0.0605264	0.0675241
1.198	0.436084	-0.676504	-0.957582	ATN1	1822	ENSG00000111676	12	6924463	6942321	atrophin 1	-0.104338	0.0725429	0.150352	0.27176	-0.0997369	0.0710694
0.193836	1.08025	-1.33842	0.0643335	ATOH7	220202	ENSG00000179774	10	68230595	68232113	atonal bHLH transcription factor 7	-0.0619629	1.36879	0.963893		-0.00325086	0.32318
0.470451	1.18604	-0.828246	-0.828246	ATOH8	84913	ENSG00000168874	2	85751344	85791383	atonal bHLH transcription factor 8	-5.02192	2.02107	0.012963		-0.132619	0.369251
0.353592	1.06141	-1.31876	-0.0962371	ATOX1	475	ENSG00000177556	5	151742316	151772532	antioxidant 1 copper chaperone	-0.169079	0.116418	0.146406	0.266359	-0.152065	0.11151
0.981412	0.738239	-0.941177	-0.778474	ATP10B	23120	ENSG00000118322	5	160563120	160852214	ATPase phospholipid transporting 10B (putative)	-1.50482	0.134183	3.4544e-29	1.58262e-27	-1.48262	0.134834
0.763115	0.929604	-0.600552	-1.09217	ATP10D	57205	ENSG00000145246	4	47485275	47593486	ATPase phospholipid transporting 10D (putative)	-0.543845	0.134119	5.01485e-05	0.000242447	-0.505497	0.134538
-0.394842	-1.055	1.30804	0.141805	ATP11A	23250	ENSG00000068650	13	112690038	112887168	ATPase phospholipid transporting 11A	0.123696	0.0649375	0.056799	0.124124	0.119471	0.0639363
0.471068	-0.31808	1.07789	-1.23088	ATP11B	23200	ENSG00000058063	3	182793503	182921629	ATPase phospholipid transporting 11B (putative)	-0.00651862	0.0651753	0.920331	0.958675	-0.00610625	0.0639597
0.466551	0.32463	-1.48278	0.6916	ATP11B-DT		ENSG00000240063	3	182783236	182793394		-0.530614	2.51484	0.832893		-0.0092312	0.32986
-0.620308	-1.04722	1.08697	0.580556	ATP11C	286410	ENSG00000101974	X	139726346	139945276	ATPase phospholipid transporting 11C	0.47435	0.0890885	1.01244e-07	7.5639e-07	0.457579	0.0890142
-0.213577	1.46989	-0.676344	-0.57997	ATP13A1	57130	ENSG00000105726	19	19645198	19663676	ATPase 13A1	-0.0866901	0.0849119	0.307282	0.467755	-0.0814499	0.0825196
1.1784	0.0985383	-1.26552	-0.0114173	ATP13A2	23400	ENSG00000159363	1	16985958	17011928	ATPase cation transporting 13A2	-0.131111	0.0855148	0.125227	0.235787	-0.123396	0.0832547
-0.629108	-0.982812	1.21776	0.394159	ATP13A3	79572	ENSG00000133657	3	194402672	194498364	ATPase 13A3	0.28776	0.0633754	5.61043e-06	3.20812e-05	0.280309	0.0629739
0.417956	-1.47453	0.743816	0.312756	ATP13A3-DT		ENSG00000233058	3	194487140	194521156		0.190289	0.371078	0.608091	0.746225	0.0868187	0.254396
0.730606	0.197692	-1.46321	0.534917	ATP13A4	84239	ENSG00000127249	3	193398967	193593111	ATPase 13A4	-0.885869	2.36635	0.708136		-0.0174178	0.329994
-0.810298	-0.919688	0.840872	0.889114	ATP1A1	476	ENSG00000163399	1	116372668	116410261	ATPase Na+/K+ transporting subunit alpha 1	0.37837	0.0470553	8.91334e-16	1.66279e-14	0.373989	0.0469874
0.0499228	1.12455	0.134976	-1.30945	ATP1A1-AS1	84852	ENSG00000203865	1	116378437	116421301	ATP1A1 antisense RNA 1	-0.125037	0.293014	0.669578	0.792073	-0.0707024	0.223157
-0.871942	-0.720437	0.320348	1.27203	ATP1A3	478	ENSG00000105409	19	41966582	41997497	ATPase Na+/K+ transporting subunit alpha 3	0.445457	0.89349	0.61809	0.753718	0.0551932	0.317417
-0.681131	-1.03289	0.845178	0.868839	ATP1B1	481	ENSG00000143153	1	169105697	169310992	ATPase Na+/K+ transporting subunit beta 1	0.33889	0.05288	1.46803e-10	1.59023e-09	0.333396	0.0527267
-0.688072	0.687162	-1.01304	1.01396	ATP1B2	482	ENSG00000129244	17	7646627	7657770	ATPase Na+/K+ transporting subunit beta 2	0.051911	1.05511	0.96076		0.00497362	0.317253
-0.733403	-0.989154	0.868064	0.854493	ATP1B3	483	ENSG00000069849	3	141876124	141926549	ATPase Na+/K+ transporting subunit beta 3	0.255055	0.0594793	1.80185e-05	9.40594e-05	0.248898	0.0590592
-0.134614	-0.907523	-0.377612	1.41975	ATP23	91419	ENSG00000166896	12	57906039	57959148	ATP23 metallopeptidase and ATP synthase assembly factor homolog	0.204929	0.185801	0.270048	0.424349	0.160482	0.167952
0.922637	-0.180473	0.588285	-1.33045	ATP2A1	487	ENSG00000196296	16	28878405	28904466	ATPase sarcoplasmic/endoplasmic reticulum Ca2+ transporting 1	-0.422463	0.623077	0.497754	0.653353	-0.0962301	0.307866
-0.538165	0.960101	-1.13281	0.71087	ATP2A1-AS1	100289092	ENSG00000260442	16	28878957	28879938	ATP2A1 antisense RNA 1	-0.277175	1.42	0.845242		-0.0141512	0.324272
-0.849998	-0.809797	0.480417	1.17938	ATP2A2	488	ENSG00000174437	12	110280756	110351093	ATPase sarcoplasmic/endoplasmic reticulum Ca2+ transporting 2	0.0508863	0.0488228	0.297289	0.455884	0.0498279	0.0483174
1.45845	-0.18217	-0.750555	-0.52573	ATP2A3	489	ENSG00000074370	17	3923870	3964464	ATPase sarcoplasmic/endoplasmic reticulum Ca2+ transporting 3	-0.207298	0.130745	0.112851	0.216889	-0.182409	0.124586
-0.739111	-0.980302	0.944943	0.774471	ATP2B1	490	ENSG00000070961	12	89588049	89709300	ATPase plasma membrane Ca2+ transporting 1	0.41796	0.0596538	2.44484e-12	3.27739e-11	0.410579	0.0595716
0.960497	0.761226	-0.771935	-0.949788	ATP2B1-AS1	338758	ENSG00000271614	12	89708959	89712590	ATP2B1 antisense RNA 1	-0.850079	0.648935	0.190209	0.326165	-0.201376	0.3618
0.762101	0.90806	-0.518924	-1.15124	ATP2B4	493	ENSG00000058668	1	203626787	203744081	ATPase plasma membrane Ca2+ transporting 4	-0.829853	0.159249	1.87776e-07	1.35668e-06	-0.781909	0.161698
-0.986953	-0.734681	0.906398	0.815236	ATP2C1	27032	ENSG00000017260	3	130850595	131016712	ATPase secretory pathway Ca2+ transporting 1	0.103151	0.0584224	0.0774615	0.160284	0.100245	0.0576529
0.89528	0.828154	-0.744411	-0.979024	ATP2C2	9914	ENSG00000064270	16	84368527	84464187	ATPase secretory pathway Ca2+ transporting 2	-0.526748	0.0754639	2.94903e-12	3.9162e-11	-0.514608	0.0755467
0.430877	1.18681	-0.588197	-1.02949	ATP2C2-AS1	105371374	ENSG00000261286	16	84459259	84467361	ATP2C2 antisense RNA 1	-1.84041	0.668621	0.00591341	0.0179348	-1.19241	0.854309
-0.998019	-0.697156	0.64619	1.04899	ATP5F1A	498	ENSG00000152234	18	46080248	46104334	ATP synthase F1 subunit alpha	0.396207	0.0542423	2.78545e-13	4.07408e-12	0.390124	0.0541655
0.656534	0.800779	-1.38662	-0.0706918	ATP5F1AP3	645443	ENSG00000263232	16	72005037	72006543	ATP synthase F1 subunit alpha pseudogene 3	-2.22725	2.43874	0.361095		-0.0417789	0.33355
-1.18649	-0.445442	0.639568	0.992361	ATP5F1B	506	ENSG00000110955	12	56638175	56645984	ATP synthase F1 subunit beta	0.260965	0.0538674	1.26878e-06	8.0308e-06	0.256008	0.0535736
-1.18427	-0.472362	0.86124	0.795391	ATP5F1C	509	ENSG00000165629	10	7788147	7807815	ATP synthase F1 subunit gamma	0.299287	0.063919	2.837e-06	1.70326e-05	0.291173	0.0635573
-0.43561	1.28692	-1.05482	0.203511	ATP5F1CP1	645560	ENSG00000224004	14	53991101	53991995	ATP synthase F1 subunit gamma pseudogene 1	-0.377189	1.9723	0.848335		-0.0103108	0.328191
-0.889296	-0.553201	0.0644672	1.37803	ATP5F1D	513	ENSG00000099624	19	1241746	1244825	ATP synthase F1 subunit delta	0.409689	0.134368	0.00229599	0.00777999	0.372521	0.132833
-1.15331	-0.443424	0.483365	1.11337	ATP5F1E	514	ENSG00000124172	20	59025475	59032345	ATP synthase F1 subunit epsilon	0.20825	0.0604999	0.000577085	0.00224115	0.202642	0.0599349
-0.0152747	-1.35765	1.01365	0.359274	ATP5F1EP2		ENSG00000180389	13	27945260	27945415		1.07427	0.983293	0.274603	0.429424	0.117571	0.342406
-1.26976	1.17282	-0.0127618	0.109702	ATP5IF1	93974	ENSG00000130770	1	28236109	28246906	ATP synthase inhibitory factor subunit 1	0.00961782	0.0860287	0.910984	0.954104	0.00833746	0.083328
-0.934886	-0.79431	0.864111	0.865085	ATP5MC1	516	ENSG00000159199	17	48892765	48895871	ATP synthase membrane subunit c locus 1	0.902754	0.105917	1.55184e-17	3.31137e-16	0.883111	0.10662
1.34444	0.14854	-0.913715	-0.579264	ATP5MC1P6		ENSG00000214318	18	63496989	63497400		-0.94819	1.39384	0.496333		-0.0517717	0.329136
-0.519641	0.759164	-1.15053	0.911004	ATP5MC2	517	ENSG00000135390	12	53632726	53677408	ATP synthase membrane subunit c locus 2	-0.014395	0.0674605	0.831028	0.903407	-0.0137946	0.0661183
-1.0501	-0.657478	0.913303	0.794279	ATP5MC3	518	ENSG00000154518	2	175176258	175181710	ATP synthase membrane subunit c locus 3	0.388416	0.0562674	5.08989e-12	6.54709e-11	0.38187	0.0561788
-1.28684	-0.257438	0.978735	0.565545	ATP5ME	521	ENSG00000169020	4	672436	674330	ATP synthase membrane subunit e	0.367573	0.0920149	6.47727e-05	0.000307049	0.350395	0.0914526
-0.950947	-0.646895	1.24651	0.351328	ATP5MF	9551	ENSG00000241468	7	99448475	99466186	ATP synthase membrane subunit f	0.24116	0.0824199	0.00343363	0.0110759	0.229835	0.0812203
0.173187	-0.555556	-0.946414	1.32878	ATP5MF-PTCD1	100526740	ENSG00000248919	7	99419749	99466197	ATP5MF-PTCD1 readthrough	0.131162	2.15217	0.951404		0.00313714	0.328666
-1.05444	-0.500091	0.313709	1.24082	ATP5MG	10632	ENSG00000167283	11	118401346	118433278	ATP synthase membrane subunit g	0.264736	0.087692	0.00253668	0.00847937	0.251264	0.0864128
-1.43497	0.0801359	0.768711	0.586119	ATP5MJ	9556	ENSG00000156411	14	103912288	103928269	ATP synthase membrane subunit j	0.135875	0.0750638	0.070276	0.147931	0.129786	0.0736169
-1.26596	-0.336173	0.822428	0.779706	ATP5MK	84833	ENSG00000173915	10	103389041	103396492	ATP synthase membrane subunit k	0.325216	0.0824081	7.93318e-05	0.000369212	0.312028	0.0817837
-1.045	-0.64593	1.02029	0.670635	ATP5PB	515	ENSG00000116459	1	111448864	111462773	ATP synthase peripheral stalk-membrane subunit b	0.312573	0.0611066	3.13393e-07	2.18226e-06	0.306222	0.0608302
-0.892598	-0.571036	0.0969656	1.36667	ATP5PD	10476	ENSG00000167863	17	75038863	75046985	ATP synthase peripheral stalk subunit d	0.374947	0.103169	0.000278751	0.00116255	0.353359	0.102287
-0.83496	-0.880544	0.69041	1.02509	ATP5PF	522	ENSG00000154723	21	25716503	25735673	ATP synthase peripheral stalk subunit F6	0.550234	0.0721359	2.38899e-14	3.90895e-13	0.539406	0.0722211
-0.793792	-0.570483	-0.0641268	1.4284	ATP5PO	539	ENSG00000241837	21	33903453	33915814	ATP synthase peripheral stalk subunit OSCP	0.32733	0.107508	0.00232909	0.00788357	0.305136	0.105912
1.02158	0.672026	-1.03471	-0.658898	ATP6AP1	537	ENSG00000071553	X	154428633	154436516	ATPase H+ transporting accessory protein 1	-0.286123	0.0674789	2.23337e-05	0.00011474	-0.277556	0.0669685
0.326221	0.963584	-1.39766	0.107854	ATP6AP1L	92270	ENSG00000205464	5	82279462	82386977	ATPase H+ transporting accessory protein 1 like (pseudogene)	-0.373155	0.438117	0.394367	0.558126	-0.143912	0.287905
-0.811934	-0.357586	-0.2896	1.45912	ATP6AP2	10159	ENSG00000182220	X	40579372	40606848	ATPase H+ transporting accessory protein 2	0.0520063	0.0679746	0.444221	0.603702	0.0499251	0.0666377
0.914117	0.803473	-1.00672	-0.710869	ATP6V0A1	535	ENSG00000033627	17	42458844	42522582	ATPase H+ transporting V0 subunit a1	-0.571453	0.0798346	8.1886e-13	1.15121e-11	-0.558035	0.079969
-0.865429	-0.86539	0.911591	0.819228	ATP6V0A2	23545	ENSG00000185344	12	123712353	123761755	ATPase H+ transporting V0 subunit a2	0.366866	0.0787791	3.21013e-06	1.90637e-05	0.354254	0.0783935
0.535631	0.14705	-1.45004	0.767364	ATP6V0A4	50617	ENSG00000105929	7	138706294	138799560	ATPase H+ transporting V0 subunit a4	-0.30882	1.21005	0.798559		-0.0216912	0.321548
-0.840287	-0.876414	0.696665	1.02004	ATP6V0B	533	ENSG00000117410	1	43974487	43978295	ATPase H+ transporting V0 subunit b	0.396973	0.0786962	4.55009e-07	3.10454e-06	0.384146	0.0784211
1.20442	-0.541525	-1.05131	0.388415	ATP6V0C	527	ENSG00000185883	16	2513952	2520218	ATPase H+ transporting V0 subunit c	-0.0975865	0.190635	0.60872	0.746467	-0.073719	0.166669
0.993251	0.595745	-1.23952	-0.349478	ATP6V0D1	9114	ENSG00000159720	16	67438014	67481181	ATPase H+ transporting V0 subunit d1	-0.110459	0.0799	0.16683	0.294238	-0.104626	0.077965
0.100474	-1.24756	1.19628	-0.0491907	ATP6V0D1-DT	101927837	ENSG00000270049	16	67481314	67505977	ATP6V0D1 divergent transcript	0.50605	0.771174	0.511691	0.665715	0.0820154	0.317222
-0.949684	-0.357071	1.40064	-0.0938837	ATP6V0E1	8992	ENSG00000113732	5	172983771	173035445	ATPase H+ transporting V0 subunit e1	0.0467066	0.0730398	0.522518	0.675066	0.0444908	0.071393
-0.945629	-0.74243	0.589262	1.0988	ATP6V0E2	155066	ENSG00000171130	7	149872968	149891204	ATPase H+ transporting V0 subunit e2	0.402086	0.102707	9.04449e-05	0.000415716	0.380246	0.102092
-0.502491	-0.754261	-0.204954	1.46171	ATP6V0E2-AS1	401431	ENSG00000204934	7	149867697	149880610	ATP6V0E2 antisense RNA 1	0.476258	0.500001	0.340836	0.503146	0.157842	0.308844
1.09219	-0.378115	0.482367	-1.19644	ATP6V1A	523	ENSG00000114573	3	113747033	113812056	ATPase H+ transporting V1 subunit A	-0.0402555	0.0692627	0.561106	0.707835	-0.0385208	0.0678288
-1.08354	-0.616361	0.874707	0.825189	ATP6V1B2	526	ENSG00000147416	8	20197381	20226819	ATPase H+ transporting V1 subunit B2	0.255092	0.0774365	0.000987012	0.00365281	0.244715	0.076526
-0.975944	-0.747614	0.821271	0.902287	ATP6V1C1	528	ENSG00000155097	8	103021063	103073051	ATPase H+ transporting V1 subunit C1	0.110626	0.0687517	0.107601	0.20875	0.106361	0.0675262
0.574781	1.0873	-0.600672	-1.06141	ATP6V1C2	245973	ENSG00000143882	2	10721100	10785110	ATPase H+ transporting V1 subunit C2	-0.432961	0.298659	0.147147	0.267363	-0.268516	0.261115
0.717815	0.995139	-0.973382	-0.739572	ATP6V1D	51382	ENSG00000100554	14	67294371	67360265	ATPase H+ transporting V1 subunit D	-0.436187	0.0857618	3.65641e-07	2.53137e-06	-0.420565	0.0855904
0.938541	0.780119	-0.989058	-0.729602	ATP6V1E1	529	ENSG00000131100	22	17592136	17628749	ATPase H+ transporting V1 subunit E1	-0.0355144	0.0719339	0.621512	0.755407	-0.0338407	0.0703297
0.399391	0.639431	0.453224	-1.49205	ATP6V1E2	90423	ENSG00000250565	2	46490750	46542577	ATPase H+ transporting V1 subunit E2	-0.0870438	0.176167	0.621237	0.755263	-0.0680614	0.156768
0.888852	0.803805	-1.10255	-0.590112	ATP6V1F	9296	ENSG00000128524	7	128862856	128865847	ATPase H+ transporting V1 subunit F	-0.0630335	0.100299	0.529704	0.681692	-0.0577474	0.0961977
0.564097	-1.40589	0.839795	0.0020007	ATP6V1FNB	100130705	ENSG00000272899	7	128866330	128872047	ATP6V1F neighbor	0.198273	0.771765	0.797249	0.880325	0.0316461	0.307077
-0.735921	0.525229	1.14466	-0.933971	ATP6V1G1	9550	ENSG00000136888	9	114587706	114598915	ATPase H+ transporting V1 subunit G1	0.0081081	0.0726177	0.911097	0.954124	0.00777856	0.0709647
-1.3143	0.99817	0.494452	-0.178327	ATP6V1G2	534	ENSG00000213760	6	31544444	31548427	ATPase H+ transporting V1 subunit G2	-0.148393	2.14891	0.944946		-0.00327586	0.328802
1.18625	0.0612448	-1.26051	0.0130186	ATP6V1H	51606	ENSG00000047249	8	53715543	53843558	ATPase H+ transporting V1 subunit H	-0.208628	0.105445	0.0478662	0.107778	-0.19195	0.102251
0.352865	-1.41053	0.932918	0.124744	ATP7A	538	ENSG00000165240	X	77910690	78050395	ATPase copper transporting alpha	0.118944	0.107288	0.267586	0.421706	0.108374	0.102755
-0.450877	-1.16208	1.07615	0.536808	ATP7B	540	ENSG00000123191	13	51930436	52012125	ATPase copper transporting beta	0.190335	0.08052	0.0180875	0.0474884	0.181172	0.0790202
1.24443	-0.783006	0.374208	-0.835628	ATP8A1	10396	ENSG00000124406	4	42408373	42657105	ATPase phospholipid transporting 8A1	-0.0510891	0.113547	0.652754	0.778855	-0.0456886	0.107562
1.02943	0.685273	-0.840487	-0.874217	ATP8B1	5205	ENSG00000081923	18	57646426	57803315	ATPase phospholipid transporting 8B1	-0.253186	0.0591636	1.87372e-05	9.72897e-05	-0.247018	0.0587445
-0.527145	-0.892922	1.38698	0.0330873	ATP8B2	57198	ENSG00000143515	1	154325525	154351304	ATPase phospholipid transporting 8B2	0.456584	0.432476	0.291085	0.449067	0.185831	0.300896
1.0403	-1.14578	0.60019	-0.494714	ATP8B3	148229	ENSG00000130270	19	1782075	1812276	ATPase phospholipid transporting 8B3	-0.0239846	0.755925	0.974688	0.986094	-0.00355877	0.304271
-0.818277	-0.901416	0.719841	0.999851	ATP8B4	79895	ENSG00000104043	15	49858238	50182817	ATPase phospholipid transporting 8B4 (putative)	0.484815	0.759057	0.523014	0.67549	0.0803519	0.315963
-0.278566	1.21476	0.242022	-1.17821	ATP8B5P	158381	ENSG00000179766	9	35406755	35483035	ATPase phospholipid transporting 8B5, pseudogene	-1.08773	1.37275	0.428142		-0.0596951	0.331036
1.44066	-0.0873705	-0.652456	-0.700833	ATP9A	10079	ENSG00000054793	20	51596514	51768390	ATPase phospholipid transporting 9A (putative)	-0.106463	0.0779232	0.17186	0.3012	-0.100997	0.0760972
0.695324	1.02132	-0.856294	-0.860347	ATP9B	374868	ENSG00000166377	18	79069285	79378287	ATPase phospholipid transporting 9B (putative)	-0.737339	0.122519	1.76409e-09	1.68378e-08	-0.707752	0.12355
-1.19393	-0.45526	0.88519	0.764003	ATPAF1	64756	ENSG00000123472	1	46632737	46673867	ATP synthase mitochondrial F1 complex assembly factor 1	0.322642	0.080017	5.52654e-05	0.000265455	0.310189	0.0794326
-0.378858	-0.0296365	1.38157	-0.97307	ATPAF2	91647	ENSG00000171953	17	17977409	18039209	ATP synthase mitochondrial F1 complex assembly factor 2	0.0412624	0.155717	0.791022	0.875768	0.0340668	0.14129
-0.937224	-0.738653	0.544916	1.13096	ATPSCKMT	134145	ENSG00000150756	5	10225507	10249897	ATP synthase c subunit lysine N-methyltransferase	0.289067	0.0955375	0.00248068	0.00832432	0.272329	0.094098
-0.868508	-0.811315	1.13703	0.542795	ATR	545	ENSG00000175054	3	142449007	142578733	ATR serine/threonine kinase	0.576086	0.0882689	6.73283e-11	7.58332e-10	0.559827	0.0885178
-1.17882	-0.475669	0.739323	0.915165	ATRAID	51374	ENSG00000138085	2	27212041	27217178	all-trans retinoic acid induced differentiation factor	0.11048	0.0705144	0.117169	0.223396	0.10597	0.0691988
-0.865374	-0.866368	0.842747	0.888995	ATRIP		ENSG00000164053	3	48446710	48467645		0.444058	0.147517	0.00261068	0.00869315	0.398626	0.146137
0.274167	-1.13743	1.22488	-0.361615	ATRN	8455	ENSG00000088812	20	3471018	3651118	attractin	0.0744069	0.105856	0.482114	0.639194	0.0677854	0.101125
0.965236	-0.863003	0.76077	-0.863003	ATRNL1	26033	ENSG00000107518	10	115093365	115948999	attractin like 1	-0.472509	2.53657	0.852226		-0.0079851	0.329881
-0.163723	-1.30073	1.05549	0.408963	ATRX	546	ENSG00000085224	X	77504880	77786233	ATRX chromatin remodeler	0.175107	0.073818	0.0176852	0.0465905	0.167842	0.0725778
0.990511	0.728144	-0.936169	-0.782485	ATXN1	6310	ENSG00000124788	6	16299112	16761491	ataxin 1	-1.03856	0.153661	1.39155e-11	1.70143e-10	-0.999754	0.155412
1.10685	0.45171	-0.357221	-1.20134	ATXN1-AS1		ENSG00000229931	6	16761138	16763947		-0.58269	0.592924	0.325736	0.487415	-0.149616	0.323724
-0.935938	-0.7899	0.789361	0.936477	ATXN10	25814	ENSG00000130638	22	45671798	45845307	ataxin 10	0.327031	0.0657065	6.45309e-07	4.29389e-06	0.318577	0.0653864
-1.23067	0.448833	-0.308505	1.09034	ATXN1L	342371	ENSG00000224470	16	71808439	71885268	ataxin 1 like	0.0146282	0.0821804	0.858722	0.921926	0.0138598	0.0797912
1.10058	0.531212	-0.519958	-1.11184	ATXN2	6311	ENSG00000204842	12	111443485	111599676	ataxin 2	-0.236991	0.0828138	0.00421333	0.0133072	-0.22539	0.0815246
1.24124	0.107425	-0.155528	-1.19314	ATXN2L	11273	ENSG00000168488	16	28822999	28837237	ataxin 2 like	-0.102165	0.0702627	0.145936	0.265644	-0.0979784	0.0689145
0.58775	0.628959	-1.47978	0.263072	ATXN3	4287	ENSG00000066427	14	92044496	92106621	ataxin 3	-0.055936	0.133154	0.674422	0.795628	-0.0481354	0.123858
0.703176	0.0758557	0.658421	-1.43745	ATXN7	6314	ENSG00000163635	3	63863155	64003462	ataxin 7	-0.0852007	0.109989	0.438557	0.598615	-0.0768455	0.104836
0.387295	1.22835	-0.673624	-0.942017	ATXN7L1	222255	ENSG00000146776	7	105604772	105876599	ataxin 7 like 1	-0.213158	0.187342	0.255203	0.407139	-0.165986	0.169694
-0.445273	1.31981	-1.01926	0.144721	ATXN7L2	127002	ENSG00000162650	1	109483479	109492804	ataxin 7 like 2	-0.116717	0.219378	0.594701	0.735949	-0.0817846	0.185657
-1.0562	-0.587825	0.515818	1.1282	ATXN7L3	56970	ENSG00000087152	17	44191805	44200113	ataxin 7 like 3	0.149257	0.0786039	0.0575839	0.125452	0.142055	0.076985
1.03706	0.666475	-0.972842	-0.730689	ATXN7L3B	552889	ENSG00000253719	12	74537835	74545430	ataxin 7 like 3B	-0.150963	0.0603822	0.0124147	0.0343367	-0.146548	0.0596419
0.0551699	0.75397	-1.42954	0.620401	AUH	549	ENSG00000148090	9	91213815	91361918	AU RNA binding methylglutaconyl-CoA hydratase	-0.0695542	0.150676	0.644359	0.773569	-0.0576875	0.137747
-0.99897	-0.707109	1.00585	0.700226	AUNIP	79000	ENSG00000127423	1	25831913	25859458	aurora kinase A and ninein interacting protein	0.532275	0.159101	0.000821308	0.00309471	0.478537	0.159339
0.579008	0.963241	-1.29441	-0.24784	AUP1	550	ENSG00000115307	2	74526645	74529760	AUP1 lipid droplet regulating VLDL assembly factor	-0.11317	0.0623738	0.0696192	0.146707	-0.109475	0.0614587
-1.06111	-0.60618	0.592135	1.07516	AURKA	6790	ENSG00000087586	20	56369389	56392337	aurora kinase A	0.423835	0.0747487	1.4269e-08	1.20275e-07	0.412221	0.0746258
-0.904843	-0.520401	0.0437488	1.38149	AURKAIP1	54998	ENSG00000175756	1	1373730	1375207	aurora kinase A interacting protein 1	0.280163	0.106966	0.00881427	0.0253553	0.259685	0.104767
-1.18457	-0.458605	0.686552	0.956621	AURKB	9212	ENSG00000178999	17	8204733	8210600	aurora kinase B	0.279948	0.0956633	0.00342926	0.0110651	0.263434	0.0941671
0.936343	0.367368	-1.40633	0.102622	AURKC	6795	ENSG00000105146	19	57231009	57235548	aurora kinase C	-1.86383	1.95246	0.339778		-0.0541024	0.334394
-1.25997	-0.164249	1.14298	0.281232	AUTS2	26053	ENSG00000158321	7	69598296	70793506	activator of transcription and developmental regulator AUTS2	0.195596	0.10753	0.0689141	0.145596	0.179345	0.104125
-0.827264	-0.90269	0.817996	0.911958	AVEN	57099	ENSG00000169857	15	33858782	34075155	apoptosis and caspase activation inhibitor	0.392981	0.122525	0.00133967	0.0048072	0.362278	0.121194
0.906092	0.824996	-0.870384	-0.860703	AVIL	10677	ENSG00000135407	12	57797376	57818734	advillin	-1.53269	0.438367	0.000471635	0.00186795	-1.26672	0.4755
0.493531	-0.396641	1.0905	-1.18739	AVL9	23080	ENSG00000105778	7	32495426	32588726	AVL9 cell migration associated	-0.00345624	0.0614091	0.955117	0.976551	-0.00331381	0.0603889
0.46182	1.09065	-1.21903	-0.333439	AVPI1	60370	ENSG00000119986	10	97677424	97687241	arginine vasopressin induced 1	-0.159346	0.141533	0.260224	0.41306	-0.136385	0.132493
-0.630086	1.46213	-0.659952	-0.172097	AVPR1B	553	ENSG00000198049	1	206106936	206117699	arginine vasopressin receptor 1B	-0.243781	0.566783	0.667112	0.79025	-0.0626621	0.292706
-0.973264	0.336427	-0.61346	1.2503	AXIN1	8312	ENSG00000103126	16	287440	352723	axin 1	0.0608424	0.0926678	0.511461	0.665472	0.0566121	0.0894156
-0.880595	-0.84527	0.964829	0.761037	AXIN2	8313	ENSG00000168646	17	65528563	65561648	axin 2	0.845658	0.103439	2.94755e-16	5.68947e-15	0.82621	0.104084
0.722271	0.997603	-0.814502	-0.905373	AXL	558	ENSG00000167601	19	41219223	41261766	AXL receptor tyrosine kinase	-1.84218	0.49956	0.000226379	0.000961632	-1.54729	0.54088
0.928537	0.798648	-0.798805	-0.92838	AZGP1	563	ENSG00000160862	7	99966720	99976042	alpha-2-glycoprotein 1, zinc-binding	-0.763172	0.0750667	2.79554e-24	9.34465e-23	-0.752343	0.0752976
1.41122	0.0078707	-0.736857	-0.682232	AZGP1P1	646282	ENSG00000214313	7	99980752	99987838	AZGP1 pseudogene 1	-1.53484	1.07698	0.154121		-0.14612	0.361826
0.388312	1.16448	-0.397186	-1.15561	AZI2	64343	ENSG00000163512	3	28315003	28349050	5-azacytidine induced 2	-0.169154	0.101006	0.0939953	0.187186	-0.156032	0.0978425
-0.61942	-1.06825	1.00359	0.684083	AZIN1	51582	ENSG00000155096	8	102826111	102893864	antizyme inhibitor 1	0.105799	0.0570335	0.0635914	0.13612	0.103003	0.0563159
0.584384	1.10733	-0.872104	-0.819608	AZIN2	113451	ENSG00000142920	1	33081104	33123492	antizyme inhibitor 2	-0.732965	0.295216	0.013035	0.0358234	-0.549215	0.303035
0.873959	0.85767	-0.840041	-0.891587	B2M	567	ENSG00000166710	15	44711358	44718851	beta-2-microglobulin	-1.08488	0.112937	7.53855e-22	2.18268e-20	-1.06473	0.113643
0.778072	0.924805	-1.06291	-0.639963	B3GALNT1	8706	ENSG00000169255	3	161083883	161105411	beta-1,3-N-acetylgalactosaminyltransferase 1 (globoside blood group)	-0.452615	0.0933111	1.23091e-06	7.82287e-06	-0.434069	0.0931366
-1.23403	-0.383452	0.91362	0.703865	B3GALNT2	148789	ENSG00000162885	1	235447190	235504452	beta-1,3-N-acetylgalactosaminyltransferase 2	0.25442	0.0765849	0.000893546	0.00333065	0.244279	0.0757178
-0.203076	1.29775	0.033804	-1.12848	B3GALT1	8708	ENSG00000172318	2	167293001	167874045	beta-1,3-galactosyltransferase 1	-2.38952	2.35257	0.30977		-0.0460907	0.334193
0.279905	-1.45491	0.826863	0.348138	B3GALT2	8707	ENSG00000162630	1	193178730	193186613	beta-1,3-galactosyltransferase 2	0.792044	1.34887	0.557076		0.0465194	0.327404
0.529791	1.11165	-1.08187	-0.559569	B3GALT4	8705	ENSG00000235863	6	33277123	33284832	beta-1,3-galactosyltransferase 4	-1.71216	0.462907	0.0002167	0.000925313	-1.44454	0.499173
1.01692	0.699658	-0.819281	-0.897294	B3GALT5	10317	ENSG00000183778	21	39556442	39673137	beta-1,3-galactosyltransferase 5	-1.26642	0.0717094	8.4647e-70	1.7124e-67	-1.25965	0.0718591
0.83857	0.891687	-0.914118	-0.816139	B3GALT5-AS1		ENSG00000184809	21	39597147	39612910		-2.00045	0.299357	2.34939e-11	2.81295e-10	-1.91182	0.304705
-0.914861	-0.77842	0.598151	1.09513	B3GALT6	126792	ENSG00000176022	1	1232237	1235041	beta-1,3-galactosyltransferase 6	0.734577	0.187405	8.86509e-05	0.000408676	0.66447	0.190746
-1.37368	0.0648717	1.00958	0.299226	B3GALT9	100288842	ENSG00000214654	9	120792403	120801787	beta-1,3-galactosyltransferase 9	0.271716	0.214404	0.205046	0.34582	0.201166	0.192598
-1.34097	-0.164872	0.610036	0.895807	B3GAT1	27087	ENSG00000109956	11	134378504	134412242	beta-1,3-glucuronyltransferase 1	2.99071	2.0729	0.149087		0.0756648	0.341178
0.720317	0.961263	-0.573152	-1.10843	B3GAT1-DT	283177	ENSG00000255545	11	134412284	134505665	B3GAT1 divergent transcript	-0.698046	0.296728	0.0186489	0.048659	-0.510693	0.301326
1.24132	-0.486343	-1.06218	0.307204	B3GAT3	26229	ENSG00000149541	11	62615296	62622154	beta-1,3-glucuronyltransferase 3	-0.101767	0.173501	0.557508	0.705475	-0.0803268	0.155054
-0.941423	-0.622428	1.28367	0.280182	B3GLCT	145173	ENSG00000187676	13	31199975	31332276	beta 3-glucosyltransferase	0.293167	0.145594	0.0440517	0.100394	0.255481	0.140138
0.935615	-1.24683	-0.355087	0.666301	B3GNT2	10678	ENSG00000170340	2	62196115	62224731	UDP-GlcNAc:betaGal beta-1,3-N-acetylglucosaminyltransferase 2	0.00797677	0.0644447	0.901492	0.947476	0.00773988	0.0632546
0.934072	0.779143	-1.01923	-0.693984	B3GNT3	10331	ENSG00000179913	19	17794828	17813576	UDP-GlcNAc:betaGal beta-1,3-N-acetylglucosaminyltransferase 3	-0.508582	0.0731402	3.56278e-12	4.65973e-11	-0.497055	0.073165
-0.0760644	-1.3114	1.08864	0.298825	B3GNT4	79369	ENSG00000176383	12	122203681	122208952	UDP-GlcNAc:betaGal beta-1,3-N-acetylglucosaminyltransferase 4	0.624172	0.65973	0.344097	0.506711	0.135567	0.326823
1.04855	0.64647	-0.695733	-0.999287	B3GNT5	84002	ENSG00000176597	3	183253253	183298504	UDP-GlcNAc:betaGal beta-1,3-N-acetylglucosaminyltransferase 5	-0.26143	0.0768608	0.000670563	0.00257275	-0.251042	0.075976
0.418257	-0.902897	1.21505	-0.730408	B3GNT6	192134	ENSG00000198488	11	77034398	77041973	UDP-GlcNAc:betaGal beta-1,3-N-acetylglucosaminyltransferase 6	0.25055	1.35247	0.853029		0.0145569	0.323369
0.90125	0.828786	-0.818384	-0.911652	B3GNT7	93010	ENSG00000156966	2	231395710	231401164	UDP-GlcNAc:betaGal beta-1,3-N-acetylglucosaminyltransferase 7	-1.7338	0.164302	4.94298e-26	1.84645e-24	-1.70413	0.165458
1.14287	0.534931	-0.828787	-0.84901	B3GNT8	374907	ENSG00000177191	19	41425359	41428730	UDP-GlcNAc:betaGal beta-1,3-N-acetylglucosaminyltransferase 8	-1.35337	0.963458	0.16011	0.285359	-0.15909	0.3649
-0.127274	-1.31024	1.06069	0.376831	B3GNT9	84752	ENSG00000237172	16	67148104	67150998	UDP-GlcNAc:betaGal beta-1,3-N-acetylglucosaminyltransferase 9	0.0274476	0.226191	0.903416	0.948858	0.0188016	0.187159
-0.609919	-0.978046	0.340878	1.24709	B3GNTL1	146712	ENSG00000175711	17	82942149	83051809	UDP-GlcNAc:betaGal beta-1,3-N-acetylglucosaminyltransferase like 1	0.170915	0.223725	0.444896	0.604394	0.120331	0.190909
0.5592	-0.354443	1.02472	-1.22948	B4GALNT1	2583	ENSG00000135454	12	57623409	57633239	beta-1,4-N-acetyl-galactosaminyltransferase 1	-0.0563318	0.695208	0.935419	0.967085	-0.0101271	0.300175
0.865879	-1.28438	-0.297235	0.715735	B4GALNT3	283358	ENSG00000139044	12	459939	563509	beta-1,4-N-acetyl-galactosaminyltransferase 3	0.015791	0.117028	0.892665	0.942523	0.0141756	0.11036
-0.675404	-1.00367	0.587732	1.09135	B4GALNT4	338707	ENSG00000182272	11	369499	382117	beta-1,4-N-acetyl-galactosaminyltransferase 4	1.03979	0.220057	2.30025e-06	1.40349e-05	0.959163	0.225464
0.881671	0.849168	-0.908253	-0.822586	B4GALT1	2683	ENSG00000086062	9	33104082	33167356	beta-1,4-galactosyltransferase 1	-0.53471	0.0706598	3.80796e-14	6.08999e-13	-0.523971	0.0707269
0.847338	0.857409	-0.635825	-1.06892	B4GALT1-AS1		ENSG00000233554	9	33166948	33182865		-0.828567	0.592627	0.162076	0.288068	-0.233027	0.371785
-0.873746	-0.85675	0.814072	0.916424	B4GALT2	8704	ENSG00000117411	1	43978943	43991170	beta-1,4-galactosyltransferase 2	0.734142	0.124217	3.41763e-09	3.12237e-08	0.704205	0.125232
-0.627001	-1.03578	0.556048	1.10673	B4GALT3	8703	ENSG00000158850	1	161171310	161177968	beta-1,4-galactosyltransferase 3	0.208689	0.0985886	0.0342797	0.0815523	0.194207	0.0960336
0.665867	0.706559	-1.43308	0.0606536	B4GALT4	8702	ENSG00000121578	3	119211732	119240946	beta-1,4-galactosyltransferase 4	-0.0922179	0.100754	0.360045	0.522929	-0.0845879	0.0967825
0.852985	0.878967	-0.867615	-0.864337	B4GALT5	9334	ENSG00000158470	20	49632945	49713878	beta-1,4-galactosyltransferase 5	-0.191735	0.0510709	0.000173832	0.000756742	-0.187799	0.0506961
-0.544822	-1.13578	0.818225	0.862374	B4GALT6	9331	ENSG00000118276	18	31622246	31685836	beta-1,4-galactosyltransferase 6	0.213991	0.0857141	0.0125404	0.0346473	0.202734	0.0840849
-1.39039	0.993489	0.221077	0.175825	B4GALT7	11285	ENSG00000027847	5	177600132	177610330	beta-1,4-galactosyltransferase 7	0.0403213	0.141974	0.776407	0.866718	0.0342815	0.130834
-1.11765	-0.449795	0.383667	1.18378	B4GAT1	11041	ENSG00000174684	11	66345374	66347629	beta-1,4-glucuronyltransferase 1	0.267942	0.126929	0.0347761	0.0825397	0.240331	0.122872
0.263018	-1.47512	0.505434	0.706667	B9D1	27077	ENSG00000108641	17	19334308	19378193	B9 domain containing 1	0.278167	0.26808	0.299445	0.458513	0.177956	0.224163
-0.369502	1.48981	-0.469583	-0.650721	B9D2	80776	ENSG00000123810	19	41354417	41364165	B9 domain containing 2	-0.163885	0.28689	0.567833	0.713794	-0.0952124	0.222922
-1.46375	0.349555	0.796417	0.317774	BAALC-AS1	105369147	ENSG00000247081	8	103153394	103298772	uncharacterized LOC105369147	0.263718	0.360563	0.464532	0.622614	0.12585	0.258516
0.718799	0.965682	-0.585291	-1.09919	BAAT	570	ENSG00000136881	9	101354182	101385400	bile acid-CoA:amino acid N-acyltransferase	-0.672999	0.183167	0.000238561	0.00100843	-0.603453	0.185878
-0.749252	0.739479	-0.967673	0.977446	BABAM1	29086	ENSG00000105393	19	17267376	17281249	BRISC and BRCA1 A complex member 1	0.00915533	0.187364	0.961028	0.979879	0.0071698	0.163281
-1.03554	-0.60207	1.15368	0.483927	BABAM2	9577	ENSG00000158019	2	27889941	28338901	BRISC and BRCA1 A complex member 2	0.100359	0.117222	0.391917	0.555698	0.0898024	0.111207
0.231059	-0.972499	1.2997	-0.558255	BACE1	23621	ENSG00000186318	11	117285232	117316259	beta-secretase 1	0.059992	0.129605	0.643449	0.773064	0.0523151	0.121033
1.3619	0.137159	-0.787065	-0.711996	BACE1-AS		ENSG00000278768	11	117288453	117293578		-0.51984	0.251016	0.0383638	0.0895673	-0.388912	0.242973
-0.769787	-0.957156	0.855947	0.870996	BACE2	25825	ENSG00000182240	21	41167801	41282530	beta-secretase 2	0.686496	0.0559714	1.39391e-34	8.89871e-33	0.680321	0.0560509
1.23784	0.232486	-0.327253	-1.14307	BACH1		ENSG00000156273	21	29194071	29630751		-0.141306	0.0749119	0.0592544	0.128463	-0.134907	0.0734537
0.626476	-1.47946	0.592199	0.260789	BACH1-IT1		ENSG00000248476	21	29351634	29361894		0.416602	0.903892	0.644872	0.773933	0.0510562	0.316834
-1.03256	-0.670931	0.723837	0.979657	BACH1-IT2		ENSG00000228817	21	29370497	29373709		2.40303	1.6901	0.155075		0.0949611	0.346135
0.898846	0.781068	-1.13232	-0.547594	BACH2	60468	ENSG00000112182	6	89926528	90296843	BTB domain and CNC homolog 2	-2.20286	1.24455	0.0767258		-0.168371	0.38266
0.732661	0.973692	-1.02539	-0.680966	BAD	572	ENSG00000002330	11	64269830	64284704	BCL2 associated agonist of cell death	-0.353477	0.134507	0.00859002	0.0247561	-0.317622	0.131757
-0.896742	-0.819146	0.695594	1.0203	BAG1	573	ENSG00000107262	9	33247820	33264720	BAG cochaperone 1	0.162466	0.0748615	0.0299897	0.0728782	0.155443	0.0735231
-0.955112	-0.754987	1.02169	0.688414	BAG2	9532	ENSG00000112208	6	57172326	57189833	BAG cochaperone 2	0.753014	0.0965391	6.18604e-15	1.07305e-13	0.735099	0.0970944
1.32104	0.2262	-0.715677	-0.831563	BAG3	9531	ENSG00000151929	10	119651380	119677819	BAG cochaperone 3	-0.0782462	0.0958979	0.414539	0.577057	-0.0721868	0.0923658
-0.736027	-0.986242	0.825886	0.896383	BAG4	9530	ENSG00000156735	8	38176533	38213301	BAG cochaperone 4	0.276307	0.0994641	0.00547022	0.0167373	0.258651	0.0976627
-0.824868	-0.901166	0.957609	0.768425	BAG5	9529	ENSG00000166170	14	103556545	103562657	BAG cochaperone 5	0.119797	0.0728563	0.100117	0.196909	0.11478	0.0714357
0.54122	0.995658	-1.28552	-0.251357	BAG6	7917	ENSG00000204463	6	31639028	31652705	BAG cochaperone 6	-0.110253	0.0628385	0.0793358	0.163381	-0.106598	0.0618964
0.0673803	0.687659	-1.43524	0.680201	BAHCC1	57597	ENSG00000266074	17	81395457	81466332	BAH domain and coiled-coil containing 1	-0.0819123	0.179309	0.647799	0.775616	-0.063519	0.15875
-0.922894	-0.800047	0.752081	0.970859	BAHD1	22893	ENSG00000140320	15	40439721	40468236	bromo adjacent homology domain containing 1	0.194984	0.116645	0.0946022	0.188226	0.176101	0.112168
0.735979	0.986449	-0.89183	-0.830598	BAIAP2	10458	ENSG00000175866	17	81035122	81117434	BAR/IMD domain containing adaptor protein 2	-0.540815	0.112095	1.40283e-06	8.83261e-06	-0.514019	0.112364
0.615717	1.07587	-0.718015	-0.973574	BAIAP2-DT	440465	ENSG00000226137	17	81029130	81034881	BAIAP2 divergent transcript	-0.319326	0.148788	0.0318589	0.0766672	-0.277916	0.143779
0.975781	0.728638	-0.67274	-1.03168	BAIAP2L1	55971	ENSG00000006453	7	98291650	98401090	BAR/IMD domain containing adaptor protein 2 like 1	-0.5482	0.0727609	4.91088e-14	7.73476e-13	-0.536952	0.0728592
0.98386	0.739409	-0.846385	-0.876885	BAIAP2L2	80115	ENSG00000128298	22	38084652	38111015	BAR/IMD domain containing adaptor protein 2 like 2	-0.657423	0.0903819	3.49411e-13	5.03961e-12	-0.640776	0.0907041
1.26834	0.331572	-0.772374	-0.827536	BAIAP3	8938	ENSG00000007516	16	1333638	1349441	BAI1 associated protein 3	-0.26307	0.273451	0.336032	0.498321	-0.163903	0.225238
-0.240196	0.944669	-1.30139	0.596912	BAK1	578	ENSG00000030110	6	33572547	33580293	BCL2 antagonist/killer 1	-0.0457738	0.118081	0.698277	0.812995	-0.040462	0.111417
0.759234	0.0176206	0.6415	-1.41835	BAK1P1		ENSG00000175730	20	32690180	32690815		-0.550945	1.64574	0.737799		-0.0214409	0.327
0.472281	1.15154	-1.0693	-0.554528	BAMBI	25805	ENSG00000095739	10	28677510	28682932	BMP and activin membrane bound inhibitor	-0.340527	0.112973	0.0025764	0.00859924	-0.315285	0.111325
-0.949012	-0.681153	0.42349	1.20667	BANF1	8815	ENSG00000175334	11	66002228	66004149	BAF nuclear assembly factor 1	0.369987	0.0817056	5.94629e-06	3.38172e-05	0.356381	0.0812831
0.879262	0.316346	0.242459	-1.43807	BANF1P2		ENSG00000230306	10	133344643	133344906		-1.71484	2.61988	0.512757		-0.0265208	0.331587
0.245238	-0.920175	1.30322	-0.628286	BANF1P3		ENSG00000237758	2	230725143	230725403		0.480397	1.0511	0.647642		0.044108	0.320926
0.698593	1.01554	-0.932975	-0.781156	BANK1	55024	ENSG00000153064	4	101411286	102074812	B cell scaffold protein with ankyrin repeats 1	-1.01031	0.163984	7.22669e-10	7.2579e-09	-0.964995	0.166366
-0.533389	-1.12871	0.6575	1.0046	BANP	54971	ENSG00000172530	16	87949244	88077318	BTG3 associated nuclear protein	0.198897	0.187413	0.288563	0.446238	0.154386	0.168859
-1.38772	-0.0557546	0.600701	0.842777	BAP1	8314	ENSG00000163930	3	52401008	52410008	BRCA1 associated protein 1	0.190652	0.0905146	0.035177	0.0833641	0.179145	0.0884549
-0.665271	-1.04194	0.93875	0.768459	BARD1	580	ENSG00000138376	2	214725646	214809683	BRCA1 associated RING domain 1	0.304875	0.0925806	0.000990963	0.00366569	0.288717	0.0913991
-0.701899	-1.00063	1.01977	0.682755	BARX2	8538	ENSG00000043039	11	129375848	129452279	BARX homeobox 2	0.905085	0.389419	0.0201153	0.0518424	0.592873	0.414685
-0.640124	0.182097	-0.878278	1.3363	BATF	10538	ENSG00000156127	14	75522455	75546993	basic leucine zipper ATF-like transcription factor	0.211418	0.341177	0.535475	0.686509	0.105784	0.247189
0.980152	0.742158	-0.912769	-0.809541	BATF2	116071	ENSG00000168062	11	64987945	64997018	basic leucine zipper ATF-like transcription factor 2	-2.2626	0.43586	2.09033e-07	1.49982e-06	-2.09025	0.449475
-0.326201	-1.2263	0.472414	1.08009	BATF3	55509	ENSG00000123685	1	212686417	212699840	basic leucine zipper ATF-like transcription factor 3	0.884545	1.01755	0.384691		0.0887184	0.331691
-0.903317	-0.514144	0.0323142	1.38515	BAX	581	ENSG00000087088	19	48954815	48961798	BCL2 associated X, apoptosis regulator	0.114752	0.0682963	0.0929163	0.185368	0.110429	0.0671034
-0.949049	-0.775026	0.783228	0.940848	BAZ1A	11177	ENSG00000198604	14	34752731	34875647	bromodomain adjacent to zinc finger domain 1A	0.276856	0.0697045	7.1314e-05	0.000335303	0.268026	0.0691267
-0.136645	0.809875	0.68779	-1.36102	BAZ1A-AS1	112268124	ENSG00000258738	14	34874343	34876459	BAZ1A antisense RNA 1	-0.106609	0.347477	0.758989	0.854185	-0.0508127	0.242596
-0.669764	-1.02186	1.04131	0.650312	BAZ1B	9031	ENSG00000009954	7	73440406	73522293	bromodomain adjacent to zinc finger domain 1B	0.240042	0.0604163	7.09331e-05	0.000333748	0.233772	0.0599294
1.25678	0.148123	-0.248747	-1.15615	BAZ2A	11176	ENSG00000076108	12	56595596	56636816	bromodomain adjacent to zinc finger domain 2A	-0.126613	0.0587135	0.0310481	0.0749359	-0.123002	0.0579757
1.24491	0.348618	-0.624987	-0.968538	BAZ2B	29994	ENSG00000123636	2	159318979	159616569	bromodomain adjacent to zinc finger domain 2B	-0.368574	0.0801763	4.2853e-06	2.50665e-05	-0.355359	0.0797453
1.40532	-0.907158	-0.0515412	-0.446624	BAZ2B-AS1		ENSG00000224152	2	159615294	159618637		-0.103595	0.292583	0.723286	0.829893	-0.0584986	0.221667
0.187984	1.33202	-0.627411	-0.892597	BBC3	27113	ENSG00000105327	19	47220822	47232766	BCL2 binding component 3	-0.472569	0.149481	0.00157014	0.00553726	-0.424915	0.148824
0.768373	0.345053	0.357258	-1.47068	BBIP1	92482	ENSG00000214413	10	110898730	110919201	BBSome interacting protein 1	-0.18488	0.140399	0.187899	0.322986	-0.159225	0.132284
0.186004	1.13891	-1.29118	-0.0337329	BBLN	79095	ENSG00000171159	9	128160265	128163924	bublin coiled coil protein	-0.30431	0.149072	0.0412144	0.0951529	-0.263736	0.143476
0.802732	0.927085	-0.865912	-0.863905	BBOF1	80127	ENSG00000119636	14	74019349	74082863	basal body orientation factor 1	-1.11575	0.396163	0.00485681	0.0151007	-0.829231	0.435566
1.25313	0.352468	-0.893489	-0.712112	BBS1	582	ENSG00000174483	11	66510606	66533613	Bardet-Biedl syndrome 1	-1.24887	0.726475	0.0856003	0.173778	-0.275302	0.439291
1.05203	0.60007	-1.11626	-0.535833	BBS10	79738	ENSG00000179941	12	76344474	76348415	Bardet-Biedl syndrome 10	-0.2279	0.113823	0.0452594	0.102696	-0.207442	0.110189
0.995946	0.637642	-0.451281	-1.18231	BBS12	166379	ENSG00000181004	4	122732702	122744942	Bardet-Biedl syndrome 12	-0.686475	0.317251	0.0304778	0.0738685	-0.471937	0.317359
1.29157	-0.463562	-1.03616	0.208154	BBS2	583	ENSG00000125124	16	56465640	56582667	Bardet-Biedl syndrome 2	-0.0689249	0.131119	0.599119	0.739148	-0.0596513	0.122283
-1.39488	-0.0171677	0.537123	0.874929	BBS4	585	ENSG00000140463	15	72686179	72738475	Bardet-Biedl syndrome 4	0.176675	0.150051	0.239021	0.387071	0.149235	0.139941
-1.10101	1.25598	-0.392352	0.23738	BBS5	129880	ENSG00000163093	2	169479480	169506655	Bardet-Biedl syndrome 5	-0.0305502	0.268883	0.90954	0.952928	-0.0181304	0.209535
0.776877	0.950638	-0.846503	-0.881012	BBS7	55212	ENSG00000138686	4	121824329	121870487	Bardet-Biedl syndrome 7	-0.279062	0.102184	0.00631484	0.0189603	-0.260119	0.100282
0.710758	0.930983	-0.446411	-1.19533	BBS9	27241	ENSG00000122507	7	33109557	33877180	Bardet-Biedl syndrome 9	-0.182097	0.197561	0.356672	0.519241	-0.137165	0.175039
0.983481	0.714759	-0.64928	-1.04896	BBX	56987	ENSG00000114439	3	107522936	107811339	BBX high mobility group box domain containing	-0.488243	0.0903218	6.45947e-08	4.94443e-07	-0.47081	0.0903186
0.764	0.962355	-0.866905	-0.859449	BCAM	4059	ENSG00000187244	19	44809071	44821421	basal cell adhesion molecule (Lutheran blood group)	-1.19577	0.122422	1.55048e-22	4.71716e-21	-1.17361	0.123272
-0.772122	0.7368	0.982112	-0.94679	BCAN-AS1		ENSG00000272068	1	156637783	156641004		0.00229695	0.218901	0.991628	0.995655	0.00185465	0.182897
-0.171849	-0.512638	-0.769829	1.45432	BCAP29	55973	ENSG00000075790	7	107580246	107629170	B cell receptor associated protein 29	0.341997	0.644583	0.595716	0.736757	0.0739682	0.304132
0.0255348	-0.228873	-1.10794	1.31127	BCAP31	10134	ENSG00000185825	X	153700492	153724565	B cell receptor associated protein 31	0.0131529	0.0599734	0.826406	0.900079	0.0127881	0.0590161
0.851863	0.851792	-1.07269	-0.630965	BCAR1	9564	ENSG00000050820	16	75228181	75268053	BCAR1 scaffold protein, Cas family member	-0.353416	0.0754911	2.84701e-06	1.707e-05	-0.341829	0.075087
1.07145	0.622302	-0.970031	-0.723721	BCAR3	8412	ENSG00000137936	1	93561741	93847150	BCAR3 adaptor protein, NSP family member	-0.748881	0.109253	7.15391e-12	9.03051e-11	-0.725633	0.109871
0.637008	-0.704617	-0.98978	1.05739	BCAR3-AS1		ENSG00000224093	1	93591972	93605573		0.0107088	0.278491	0.969326	0.983777	0.00662329	0.213337
1.03965	0.672755	-0.869585	-0.842821	BCAS1	8537	ENSG00000064787	20	53936777	54070594	brain enriched myelin associated protein 1	-2.48118	0.22198	5.25637e-29	2.38713e-27	-2.44208	0.2231
0.362391	1.1267	-1.23978	-0.249317	BCAS2	10286	ENSG00000116752	1	114567557	114581629	BCAS2 pre-mRNA processing factor	-0.0762188	0.0851914	0.37096	0.5342	-0.0715432	0.0827001
0.895798	0.835208	-0.835623	-0.895382	BCAS3	54828	ENSG00000141376	17	60677453	61392838	BCAS3 microtubule associated cell migration factor	-0.76529	0.180023	2.12756e-05	0.000109557	-0.701313	0.183115
-1.03459	1.08909	0.581857	-0.636356	BCAS4	55653	ENSG00000124243	20	50794894	50877177	breast carcinoma amplified sequence 4	-0.00062566	0.183518	0.99728	0.998434	-0.000264732	0.160783
-1.12289	-0.563174	0.826699	0.859368	BCAT2	587	ENSG00000105552	19	48795062	48811029	branched chain amino acid transaminase 2	0.512358	0.11972	1.87208e-05	9.72614e-05	0.482002	0.119906
-0.960604	-0.76443	0.812439	0.912595	BCCIP	56647	ENSG00000107949	10	125823546	125853695	BRCA2 and CDKN1A interacting protein	0.586536	0.0754983	7.91942e-15	1.3601e-13	0.574719	0.0756699
0.584178	0.392853	-1.49527	0.518239	BCDIN3D	144233	ENSG00000186666	12	49836043	49843106	BCDIN3 domain containing RNA methyltransferase	-0.0222638	0.15702	0.887246	0.93954	-0.0180016	0.142026
-0.281506	-0.652583	1.4816	-0.547506	BCDIN3D-AS1	100286844	ENSG00000258057	12	49827913	49841143	BCDIN3D antisense RNA 1	0.158059	1.00748	0.875335		0.0158386	0.316307
0.247206	1.28399	-0.522699	-1.00849	BCHE	590	ENSG00000114200	3	165772904	165837462	butyrylcholinesterase	-1.4655	0.857924	0.0875997	0.177006	-0.228094	0.413167
1.19818	-1.15382	-0.362824	0.318471	BCKDHA	593	ENSG00000248098	19	41397808	41425002	branched chain keto acid dehydrogenase E1 subunit alpha	-0.00900021	0.480978	0.985071	0.991563	-0.00253168	0.27347
-1.11846	-0.552481	0.990051	0.68089	BCKDHB	594	ENSG00000083123	6	80106647	80346270	branched chain keto acid dehydrogenase E1 subunit beta	0.148991	0.104169	0.152638	0.274873	0.136725	0.100431
-0.434546	-1.11079	0.334911	1.21043	BCKDK	10295	ENSG00000103507	16	31106107	31112791	branched chain keto acid dehydrogenase kinase	0.248314	0.134595	0.0650518	0.13862	0.219049	0.129027
0.981422	0.725707	-0.690753	-1.01638	BCL10	8915	ENSG00000142867	1	85265776	85276632	BCL10 immune signaling adaptor	-0.568799	0.0969564	4.44978e-09	3.98816e-08	-0.548945	0.0972149
0.284782	1.1847	-0.268005	-1.20148	BCL10-AS1		ENSG00000223653	1	85276388	85448124		-3.29353	1.99892	0.0994231		-0.0994119	0.349783
-0.749585	-0.904077	0.470832	1.18283	BCL11A	53335	ENSG00000119866	2	60450520	60554467	BCL11 transcription factor A	0.891828	0.250636	0.000373324	0.00151716	0.774087	0.259533
0.0512739	-1.37189	1.00908	0.311529	BCL11B	64919	ENSG00000127152	14	99169287	99272197	BCL11 transcription factor B	0.306631	0.210726	0.145637	0.265354	0.232246	0.192451
-0.772288	-0.954292	0.828954	0.897626	BCL2	596	ENSG00000171791	18	63123346	63320128	BCL2 apoptosis regulator	1.02197	0.237728	1.7164e-05	8.98402e-05	0.925577	0.245042
0.910031	0.815436	-0.958359	-0.767109	BCL2L1	598	ENSG00000171552	20	31664452	31723989	BCL2 like 1	-0.518662	0.0496307	1.45871e-25	5.3214e-24	-0.513954	0.0496508
0.602877	0.171037	0.687244	-1.46116	BCL2L10	10017	ENSG00000137875	15	52109263	52112775	BCL2 like 10	-0.230451	0.50371	0.647307	0.775325	-0.0705509	0.284118
-0.819069	-0.405399	1.4534	-0.22893	BCL2L11	10018	ENSG00000153094	2	111119378	111168445	BCL2 like 11	0.0564357	0.0918019	0.538717	0.689587	0.0525686	0.0886247
-0.855179	-0.849247	0.63437	1.07006	BCL2L12	83596	ENSG00000126453	19	49665142	49673916	BCL2 like 12	0.405775	0.143555	0.00470422	0.014682	0.363574	0.141459
0.316678	1.26632	-0.938478	-0.64452	BCL2L13	23786	ENSG00000099968	22	17628855	17730855	BCL2 like 13	-0.159283	0.103885	0.125212	0.235786	-0.146152	0.100301
0.783628	0.917024	-1.07268	-0.627971	BCL2L14	79370	ENSG00000121380	12	12049844	12211084	BCL2 like 14	-0.449247	0.122452	0.000243736	0.00102807	-0.417443	0.121871
0.815841	0.914746	-0.85593	-0.874657	BCL2L15	440603	ENSG00000188761	1	113876816	113887581	BCL2 like 15	-0.275841	0.094851	0.00363576	0.0116459	-0.259015	0.0933054
0.689305	1.02609	-0.876527	-0.838868	BCL2L2	599	ENSG00000129473	14	23298790	23311751	BCL2 like 2	-0.337146	0.0965102	0.000476968	0.00188518	-0.318125	0.0955009
0.344819	-0.311869	-1.19616	1.16321	BCL2L2-PABPN1	100529063	ENSG00000258643	14	23306833	23326175	BCL2L2-PABPN1 readthrough	0.00527562	0.469628	0.991037	0.995263	0.00215895	0.27126
1.31448	0.214748	-0.933064	-0.596166	BCL3	602	ENSG00000069399	19	44747705	44760044	BCL3 transcription coactivator	-0.635071	0.174523	0.000273801	0.00114404	-0.571478	0.176092
1.24953	0.273048	-0.441132	-1.08145	BCL6	604	ENSG00000113916	3	187721377	187745725	BCL6 transcription repressor	-0.331961	0.123089	0.00699831	0.0207524	-0.30239	0.120627
-0.127326	-1.36177	0.642893	0.846203	BCL6B	255877	ENSG00000161940	17	7023050	7030290	BCL6B transcription repressor	1.43052	0.840029	0.0885782	0.178613	0.237958	0.420608
-1.21644	-0.421473	0.793978	0.843936	BCL7A	605	ENSG00000110987	12	122019422	122062044	BAF chromatin remodeling complex subunit BCL7A	0.229052	0.101895	0.0245809	0.061549	0.21257	0.0994114
-0.853066	-0.877242	0.918747	0.811561	BCL7B	9275	ENSG00000106635	7	73536356	73557690	BAF chromatin remodeling complex subunit BCL7B	0.102719	0.0862046	0.233429	0.380228	0.0965808	0.0837587
-1.10806	-0.581719	0.789509	0.900269	BCL7C	9274	ENSG00000099385	16	30833626	30894302	BAF chromatin remodeling complex subunit BCL7C	0.434745	0.124901	0.000500073	0.00196857	0.402095	0.124188
-0.583521	-0.729954	-0.138267	1.45174	BCL9	607	ENSG00000116128	1	147541501	147626216	BCL9 transcription coactivator	0.0114087	0.0861315	0.894623	0.943567	0.0107736	0.0833816
0.937732	0.785636	-0.765678	-0.957691	BCL9L	283149	ENSG00000186174	11	118893875	118925926	BCL9 like	-0.409878	0.0684844	2.16407e-09	2.04673e-08	-0.399977	0.0683465
-0.838793	-0.887675	0.768073	0.958395	BCLAF1	9774	ENSG00000029363	6	136256627	136289851	BCL2 associated transcription factor 1	0.210049	0.0548807	0.000129511	0.000578382	0.205935	0.0544643
-0.135721	-1.35306	0.598458	0.890318	BCLAF1P1		ENSG00000248966	5	110948029	110950780		0.779328	1.21819	0.522339		0.0553082	0.32711
-0.1812	-1.26333	1.12714	0.317387	BCLAF1P2	731605	ENSG00000279800	16	34266041	34268649	BCL2 associated transcription factor 1 pseudogene 2	0.644666	0.712818	0.365788	0.528953	0.122289	0.326872
1.12738	0.459775	-0.434341	-1.15281	BCLAF3	256643	ENSG00000173681	X	19912860	19991061	BCLAF1 and THRAP3 family member 3	-0.201034	0.142318	0.157783	0.28205	-0.172974	0.13428
0.791428	0.936965	-0.896342	-0.832051	BCO1	53630	ENSG00000135697	16	81238689	81291142	beta-carotene oxygenase 1	-1.49618	0.278908	8.12089e-08	6.13478e-07	-1.39586	0.286688
0.174453	-0.621008	1.33778	-0.89122	BCO2	83875	ENSG00000197580	11	112175510	112224699	beta-carotene oxygenase 2	0.216118	0.765229	0.777619	0.86746	0.034845	0.307158
1.06698	0.133739	-1.34963	0.148907	BCOR	54880	ENSG00000183337	X	40049815	40177329	BCL6 corepressor	-0.100868	0.107833	0.34958	0.51176	-0.0914994	0.103047
1.47095	-0.668363	-0.217549	-0.585037	BCORL1	63035	ENSG00000085185	X	129981107	130058071	BCL6 corepressor like 1	-0.0797516	0.13597	0.557514	0.705475	-0.0683981	0.126332
-0.124084	-1.36761	0.774734	0.71696	BCORP1	286554	ENSG00000215580	Y	19455431	19567092	BCL6 corepressor pseudogene 1	0.545907	1.3418	0.68412		0.032083	0.324938
-0.810466	-0.865174	0.529004	1.14664	BCR	613	ENSG00000186716	22	23179704	23318037	BCR activator of RhoGEF and GTPase	0.183094	0.0701987	0.0091014	0.0260851	0.176252	0.069179
0.258525	0.793564	0.409364	-1.46145	BCRP3		ENSG00000215481	22	24632915	24650012		-1.24792	1.71002	0.46553		-0.0447019	0.331024
1.42582	-0.159962	-0.368107	-0.897748	BCRP8	100133044	ENSG00000236794	22	23179918	23180172	BCR pseudogene 8	-0.776754	2.21767	0.726146		-0.0171454	0.329539
-0.966861	-0.758923	0.867875	0.857909	BCS1L	617	ENSG00000074582	2	218658764	218663443	BCS1 homolog, ubiquinol-cytochrome c reductase complex chaperone	0.454668	0.0975065	3.11701e-06	1.85958e-05	0.4346	0.097351
0.440009	0.0751647	-1.41258	0.897411	BCYRN1	618	ENSG00000236824	2	47335315	47335514	brain cytoplasmic RNA 1	-0.0587984	1.37462	0.965881		-0.00301475	0.323112
-0.740936	-0.982606	0.871771	0.851771	BDH1	622	ENSG00000161267	3	197509783	197573323	3-hydroxybutyrate dehydrogenase 1	0.556751	0.0944014	3.68608e-09	3.34994e-08	0.538074	0.0945818
-0.69029	1.46328	-0.1821	-0.590889	BDH2	56898	ENSG00000164039	4	103077592	103099870	3-hydroxybutyrate dehydrogenase 2	-0.177109	0.278319	0.524546	0.676788	-0.105762	0.220161
1.15457	0.417014	-0.426532	-1.14505	BDKRB1	623	ENSG00000100739	14	96256210	96268967	bradykinin receptor B1	-1.25012	0.743331	0.0926114	0.184902	-0.25833	0.425767
0.96054	0.754377	-0.719964	-0.994952	BDKRB2	624	ENSG00000168398	14	96204679	96244166	bradykinin receptor B2	-2.00268	0.174492	1.71704e-30	8.43734e-29	-1.97321	0.175709
0.576211	1.10985	-0.756981	-0.929081	BDNF	627	ENSG00000176697	11	27654893	27722058	brain derived neurotrophic factor	-2.22788	1.21302	0.0662631		-0.180358	0.391267
1.35488	0.107206	-0.93591	-0.526181	BDNF-AS	497258	ENSG00000245573	11	27506830	27698231	BDNF antisense RNA	-0.508866	0.430621	0.237323	0.385127	-0.212796	0.310572
-0.0464402	-1.35907	0.988279	0.417229	BDP1	55814	ENSG00000145734	5	71455651	71567820	B double prime 1, subunit of RNA polymerase III transcription initiation factor IIIB	0.267501	0.0862545	0.00192672	0.00664877	0.254248	0.0850042
0.351018	-1.49056	0.623278	0.516267	BEAN1	146227	ENSG00000166546	16	66427295	66493529	brain expressed associated with NEDD4 1	0.427114	0.754359	0.571262	0.716988	0.0716644	0.313111
0.52681	1.13747	-0.980008	-0.684269	BECN1	8678	ENSG00000126581	17	42810134	42833350	beclin 1	-0.129059	0.0705837	0.0674827	0.142959	-0.123781	0.069331
0.0373643	-1.12413	1.29982	-0.213059	BEGAIN	57596	ENSG00000183092	14	100537147	100587417	brain enriched guanylate kinase associated	1.04917	0.851948	0.218139	0.36141	0.151953	0.353755
-0.951522	-0.768847	0.751452	0.968917	BEND3	57673	ENSG00000178409	6	107065182	107115515	BEN domain containing 3	0.653589	0.144881	6.44546e-06	3.64451e-05	0.61054	0.14622
0.335593	1.21573	-1.09665	-0.454682	BEND6	221336	ENSG00000151917	6	56955107	57027346	BEN domain containing 6	-0.500223	0.330181	0.129773	0.242616	-0.291912	0.287904
1.29119	-1.14246	0.0166172	-0.165346	BEND7	222389	ENSG00000165626	10	13438484	13529014	BEN domain containing 7	-0.0296435	0.136486	0.82806	0.901299	-0.0252415	0.126228
1.32896	-0.18481	-1.09418	-0.0499684	BEST1	7439	ENSG00000167995	11	61950063	61965515	bestrophin 1	-0.415843	0.872744	0.633734	0.765306	-0.053296	0.315921
1.17069	-0.703569	-0.94958	0.482454	BEST3	144453	ENSG00000127325	12	69643360	69699476	bestrophin 3	-0.232065	2.03856	0.909366		-0.00602082	0.328261
0.846512	0.867891	-0.683142	-1.03126	BEST4	266675	ENSG00000142959	1	44783585	44788170	bestrophin 4	-1.092	0.487826	0.0251877	0.0627657	-0.600733	0.543321
0.924153	0.801256	-0.774926	-0.950483	BET1	10282	ENSG00000105829	7	93962762	94004382	Bet1 golgi vesicular membrane trafficking protein	-0.18273	0.126634	0.149026	0.269927	-0.161531	0.120605
-0.947003	-0.620452	0.28887	1.27858	BET1L	51272	ENSG00000177951	11	167784	207399	Bet1 golgi vesicular membrane trafficking protein like	0.309832	0.0981538	0.00159622	0.00562034	0.291556	0.0968039
0.63832	1.06409	-0.925945	-0.776462	BEX2	84707	ENSG00000133134	X	103309346	103311007	brain expressed X-linked 2	-1.2133	0.259289	2.87813e-06	1.725e-05	-1.1102	0.267833
-0.239337	1.27924	-1.13865	0.0987489	BEX5	340542	ENSG00000184515	X	102153708	102155977	brain expressed X-linked 5	-0.0424216	0.271197	0.875699	0.932256	-0.025212	0.210551
-0.882623	-0.845122	0.779627	0.948117	BFAR	51283	ENSG00000103429	16	14632931	14669236	bifunctional apoptosis regulator	0.275087	0.0781615	0.000432416	0.00173022	0.264069	0.0773186
1.15354	0.237965	-1.26346	-0.128038	BFSP1	631	ENSG00000125864	20	17493905	17569220	beaded filament structural protein 1	-0.197383	0.348869	0.571544	0.717227	-0.0957712	0.248265
1.0119	0.443664	-0.127829	-1.32773	BGLAP	632	ENSG00000242252	1	156242184	156243317	bone gamma-carboxyglutamate protein	-2.73224	2.18954	0.212083		-0.0640281	0.337916
-0.0201287	-0.259245	1.34247	-1.06309	BHLHA15	168620	ENSG00000180535	7	98211439	98215457	basic helix-loop-helix family member a15	0.0447701	0.363107	0.901872	0.947765	0.0208023	0.245707
0.402219	0.958414	-1.3853	0.0246668	BHLHB9	80823	ENSG00000198908	X	102720688	102753540	G protein-coupled receptor associated sorting protein family member 3	-1.96958	2.56071	0.441802		-0.033241	0.332413
0.900094	0.829795	-0.81488	-0.915009	BHLHE40	8553	ENSG00000134107	3	4979437	4985323	basic helix-loop-helix family member e40	-1.5692	0.0730012	1.71301e-102	8.89451e-100	-1.56289	0.0731289
0.918011	0.355463	-1.41777	0.144299	BHLHE40-AS1	100507582	ENSG00000235831	3	4896809	4980414	BHLHE40 antisense RNA 1	-1.15851	1.19917	0.333999		-0.085787	0.335712
1.00334	0.716793	-0.866533	-0.853602	BHLHE41	79365	ENSG00000123095	12	26120030	26125037	basic helix-loop-helix family member e41	-1.60525	0.140882	4.46508e-30	2.14008e-28	-1.58206	0.141608
-0.359747	-1.10573	1.26853	0.196946	BICD1	636	ENSG00000151746	12	32106835	32383633	BICD cargo adaptor 1	0.225363	0.0893562	0.0116664	0.0324745	0.212688	0.0876224
-1.08053	-0.584667	1.06082	0.604385	BICD2	23299	ENSG00000185963	9	92711363	92764833	BICD cargo adaptor 2	0.178883	0.0916067	0.0508519	0.113338	0.167563	0.0893322
-1.21635	-0.279972	1.14979	0.346536	BICDL1	92558	ENSG00000135127	12	119989236	120094494	BICD family like cargo adaptor 1	0.107108	0.0790644	0.175514	0.306089	0.101687	0.0772136
0.880204	0.851728	-0.867437	-0.864495	BICDL2	146439	ENSG00000162069	16	3027682	3036944	BICD family like cargo adaptor 2	-1.15359	0.139706	1.49021e-16	2.95331e-15	-1.12391	0.140951
1.49371	-0.438494	-0.627115	-0.428103	BICRA	29998	ENSG00000063169	19	47608196	47703277	BRD4 interacting chromatin remodeling complex associated protein	-0.0916215	0.223298	0.681578	0.800782	-0.063265	0.186819
0.082915	0.761595	0.591772	-1.43628	BICRAL	23506	ENSG00000112624	6	42746958	42868558	BICRA like chromatin remodeling complex associated protein	-0.0736604	0.112513	0.512673	0.666325	-0.0660981	0.106947
-1.09545	-0.552913	0.563662	1.0847	BID	637	ENSG00000015475	22	17734138	17774770	BH3 interacting domain death agonist	0.259286	0.0900868	0.00399972	0.0126969	0.245222	0.088653
0.391071	1.16271	-1.1564	-0.397381	BIK	638	ENSG00000100290	22	43110750	43129712	BCL2 interacting killer	-0.47168	0.101713	3.52898e-06	2.08697e-05	-0.449329	0.101616
0.895843	0.823396	-1.00383	-0.715413	BIN1	274	ENSG00000136717	2	127048027	127107288	bridging integrator 1	-0.345482	0.0696712	7.09489e-07	4.67636e-06	-0.335638	0.0693327
1.00964	0.702858	-0.755558	-0.956944	BIN2	51411	ENSG00000110934	12	51281038	51324668	bridging integrator 2	-1.43995	0.423307	0.000669774	0.00257035	-1.17778	0.460166
0.28965	-0.64535	-0.925863	1.28156	BIN3	55909	ENSG00000147439	8	22620418	22669148	bridging integrator 3	0.0174051	0.109468	0.873671	0.931253	0.0158177	0.103961
1.01161	0.703745	-0.786342	-0.92901	BIRC2	329	ENSG00000110330	11	102347211	102378670	baculoviral IAP repeat containing 2	-0.559947	0.0783957	9.16045e-13	1.2809e-11	-0.546923	0.0785171
0.907355	0.823187	-0.89426	-0.836282	BIRC3	330	ENSG00000023445	11	102317450	102339403	baculoviral IAP repeat containing 3	-1.88186	0.103755	1.60912e-73	3.53031e-71	-1.87096	0.103953
-1.06923	-0.599145	0.603953	1.06443	BIRC5	332	ENSG00000089685	17	78214186	78225636	baculoviral IAP repeat containing 5	0.512017	0.0784885	6.86976e-11	7.7208e-10	0.498996	0.0785733
0.614617	-0.998189	1.07278	-0.689208	BIRC6	57448	ENSG00000115760	2	32357023	32618878	baculoviral IAP repeat containing 6	0.0673524	0.206964	0.744855	0.845363	0.0492904	0.1765
0.999535	0.71172	-0.978483	-0.732772	BISPR	105221694	ENSG00000282851	19	17405686	17419324	BST2 interferon stimulated positive regulator	-0.590376	0.37705	0.117401	0.223783	-0.311768	0.324531
-0.504819	-1.08305	1.18858	0.399287	BIVM	54841	ENSG00000134897	13	102799119	102841533	basic, immunoglobulin-like variable motif containing	0.280844	0.128409	0.0287351	0.070279	0.251845	0.124443
0.619248	-1.17151	1.01491	-0.462646	BLACAT1		ENSG00000281406	1	205434885	205457091		0.0576232	0.15836	0.715952	0.82515	0.0472542	0.143301
0.928615	0.732728	-1.1629	-0.498441	BLCAP	10904	ENSG00000166619	20	37492472	37527931	BLCAP apoptosis inducing factor	-0.259488	0.0771352	0.000768022	0.00291437	-0.24893	0.0762176
-0.87241	-0.859178	0.893348	0.838239	BLM	641	ENSG00000197299	15	90717346	90816166	BLM RecQ like helicase	0.645571	0.112439	9.38321e-09	8.0708e-08	0.619811	0.113072
-0.850171	-0.880779	0.906352	0.824598	BLMH	642	ENSG00000108578	17	30248203	30292056	bleomycin hydrolase	0.409704	0.0949489	1.59605e-05	8.39921e-05	0.390958	0.09453
-0.363718	-0.0383333	1.38116	-0.979105	BLNK	29760	ENSG00000095585	10	96189171	96271587	B cell linker	0.0737191	0.301429	0.806793	0.887343	0.0407974	0.224612
-1.07045	-0.584645	1.09462	0.560481	BLOC1S1	2647	ENSG00000135441	12	55716038	55720087	biogenesis of lysosomal organelles complex 1 subunit 1	0.224475	0.128206	0.0799633	0.164298	0.199491	0.122986
-1.45101	0.313624	0.295399	0.841988	BLOC1S2	282991	ENSG00000196072	10	100273280	100286680	biogenesis of lysosomal organelles complex 1 subunit 2	0.102325	0.0803598	0.202899	0.342794	0.0969423	0.0784008
-0.655421	-1.01637	0.571344	1.10045	BLOC1S3	388552	ENSG00000189114	19	45178784	45216933	biogenesis of lysosomal organelles complex 1 subunit 3	0.268659	0.236661	0.25629	0.408328	0.187406	0.20613
0.231811	-1.33994	0.0359669	1.07216	BLOC1S4	55330	ENSG00000186222	4	6716174	6717664	biogenesis of lysosomal organelles complex 1 subunit 4	0.105732	0.18398	0.565499	0.711764	0.0817731	0.162521
-1.42126	0.0718399	0.495271	0.854148	BLOC1S5	63915	ENSG00000188428	6	8013567	8064396	biogenesis of lysosomal organelles complex 1 subunit 5	0.0898516	0.135837	0.508313	0.662758	0.0774364	0.126499
-0.820134	-0.910509	0.885211	0.845432	BLOC1S6	26258	ENSG00000104164	15	45587214	45615945	biogenesis of lysosomal organelles complex 1 subunit 6	0.618428	0.0549546	2.22712e-29	1.02943e-27	0.612265	0.0550217
-1.03714	-0.3496	0.0450724	1.34167	BLVRA	644	ENSG00000106605	7	43758680	43807342	biliverdin reductase A	0.204216	0.115859	0.0779642	0.161132	0.184883	0.111652
1.00764	0.711148	-0.889523	-0.829265	BLVRB	645	ENSG00000090013	19	40447765	40465764	biliverdin reductase B	-0.454179	0.117177	0.000106181	0.000481647	-0.424937	0.116722
0.814814	0.880597	-0.599294	-1.09612	BLZF1	8548	ENSG00000117475	1	169367970	169396540	basic leucine zipper nuclear factor 1	-0.376374	0.0995907	0.000157324	0.000691078	-0.355584	0.0988441
-0.86423	-0.821483	1.12344	0.562267	BMERB1	89927	ENSG00000166780	16	15434475	15625028	bMERB domain containing 1	0.303403	0.404296	0.452984	0.611662	0.128046	0.273516
0.850786	0.866131	-1.01983	-0.697091	BMF	90427	ENSG00000104081	15	40087890	40108892	Bcl2 modifying factor	-1.6452	0.532725	0.00201328	0.00692139	-1.25005	0.604825
-1.37303	0.69995	-0.109737	0.78282	BMI1	648	ENSG00000168283	10	22321099	22331484	BMI1 proto-oncogene, polycomb ring finger	0.0236629	0.0763978	0.756765	0.85242	0.0225403	0.0744844
0.874427	0.812738	-0.568289	-1.11888	BMP1	649	ENSG00000168487	8	22165140	22212326	bone morphogenetic protein 1	-0.539715	0.150611	0.000339025	0.00139047	-0.491354	0.150956
0.907214	0.806766	-0.687838	-1.02614	BMP2	650	ENSG00000125845	20	6767686	6780246	bone morphogenetic protein 2	-1.36746	0.344672	7.26557e-05	0.000340788	-1.19501	0.3637
-0.785362	-0.877032	1.17196	0.49043	BMP2K	55589	ENSG00000138756	4	78776342	78916365	BMP2 inducible kinase	0.274126	0.089463	0.00218307	0.00744108	0.259806	0.0881796
-0.804621	-0.922531	0.792892	0.934261	BMP4	652	ENSG00000125378	14	53949736	53958761	bone morphogenetic protein 4	0.374722	0.0512942	2.76549e-13	4.04869e-12	0.369339	0.0511959
-0.696279	-0.811272	0.153493	1.35406	BMP6	654	ENSG00000153162	6	7726099	7881728	bone morphogenetic protein 6	2.03998	1.10121	0.0639564		0.200246	0.405011
-1.03863	-0.587017	0.455538	1.17011	BMP7	655	ENSG00000101144	20	57168753	57266641	bone morphogenetic protein 7	0.383685	0.14043	0.00629115	0.0188965	0.343911	0.138046
0.0453558	1.33306	-1.05723	-0.321179	BMP8A	353500	ENSG00000183682	1	39491636	39529869	bone morphogenetic protein 8a	-0.376868	0.329652	0.252944	0.404488	-0.206143	0.264188
0.580141	-1.44168	0.75779	0.103744	BMP8B	656	ENSG00000116985	1	39757182	39788865	bone morphogenetic protein 8b	0.0970208	0.140455	0.489717	0.646085	0.0829061	0.130161
-1.04493	-0.584438	1.16046	0.468906	BMPR1A	657	ENSG00000107779	10	86756601	86932825	bone morphogenetic protein receptor type 1A	0.0902609	0.093305	0.333357	0.49577	0.0838652	0.0901487
0.647302	-0.125962	-1.36277	0.841427	BMPR1AP1	100421515	ENSG00000219642	6	129157523	129159120	bone morphogenetic protein receptor type 1A pseudogene 1	-0.13077	0.949124	0.890414	0.941311	-0.013999	0.314138
-0.207299	-0.540081	-0.718567	1.46595	BMPR1AP2		ENSG00000232460	11	121361854	121362865		0.522936	2.02403	0.796127		0.0139261	0.32858
-1.40999	0.623412	0.789478	-0.00289944	BMPR1B	658	ENSG00000138696	4	94757955	95158448	bone morphogenetic protein receptor type 1B	0.359915	0.985187	0.714868		0.0369478	0.317945
1.35298	-0.0994769	-0.19437	-1.05913	BMPR2	659	ENSG00000204217	2	202376327	202567751	bone morphogenetic protein receptor type 2	-0.222857	0.144042	0.121822	0.230658	-0.19188	0.136402
-0.921491	-0.807915	0.827929	0.901477	BMS1	9790	ENSG00000165733	10	42782795	42834937	BMS1 ribosome biogenesis factor	0.40042	0.0651802	8.08393e-10	8.06684e-09	0.391609	0.0650509
-0.326258	1.34641	0.0192555	-1.03941	BMS1P1	399761	ENSG00000204177	10	46786674	46811989	BMS1 pseudogene 1	-0.094159	0.295539	0.750029	0.848453	-0.0525709	0.222832
0.956119	-0.0768587	0.480527	-1.35979	BMS1P2		ENSG00000251079	10	47538377	47551954		-0.721026	1.60439	0.653137		-0.0295985	0.327565
1.21742	0.231325	-1.17986	-0.268882	BMS1P20		ENSG00000272779	22	22303224	22310401		-0.635096	0.618376	0.304402	0.464142	-0.154377	0.329767
1.41086	-0.0872059	-0.411001	-0.912655	BMS1P23		ENSG00000286156	2	94193659	94208408		-0.42197	0.317633	0.184019	0.317896	-0.245722	0.267273
1.30559	-0.371631	0.133523	-1.06748	BMS1P4		ENSG00000242338	10	73715843	73730469		-0.395861	0.799253	0.620396	0.755157	-0.058984	0.313201
0.193836	1.08025	-1.33842	0.0643335	BMS1P4	729096	ENSG00000271816	10	73699151	73730487	BMS1 pseudogene 4	-0.0619629	1.36879	0.963893		-0.00325086	0.32318
0.612678	-0.073976	-1.38157	0.842866	BMS1P4-AGAP5	113939925	ENSG00000242288	10	73674295	73730466	BMS1P4-AGAP5 readthrough	-0.190648	1.98343	0.923425		-0.00521042	0.327951
-1.20827	0.10577	-0.127402	1.2299	BMS1P8		ENSG00000260518	16	33687025	33707213		0.629011	2.32154	0.786433		0.0126045	0.329591
0.622591	1.07246	-0.960713	-0.734335	BMT2	154743	ENSG00000164603	7	112819147	112939875	base methyltransferase of 25S rRNA 2 homolog	-0.253767	0.158759	0.109944	0.212323	-0.213226	0.149718
-0.294728	0.951016	-1.27507	0.618785	BMX	660	ENSG00000102010	X	15464246	15556529	BMX non-receptor tyrosine kinase	-0.606768	2.09483	0.772084		-0.0147634	0.328986
-0.973169	-0.734581	0.687849	1.0199	BNIP1	662	ENSG00000113734	5	173144442	173164387	BCL2 interacting protein 1	0.431957	0.16431	0.00856592	0.0247003	0.376183	0.1617
0.941479	0.787127	-0.862199	-0.866407	BNIP2	663	ENSG00000140299	15	59659146	59689534	BCL2 interacting protein 2	-0.455191	0.0770866	3.52806e-09	3.2176e-08	-0.442484	0.0770076
-0.856615	-0.873626	0.920439	0.809802	BNIP3	664	ENSG00000176171	10	131967684	131981967	BCL2 interacting protein 3	0.606896	0.102206	2.88613e-09	2.67125e-08	0.585298	0.102612
0.889839	0.832045	-0.990256	-0.731629	BNIP3L	665	ENSG00000104765	8	26383054	26505636	BCL2 interacting protein 3 like	-0.661852	0.072182	4.76542e-20	1.21292e-18	-0.65123	0.0723449
-0.739599	-0.573558	-0.137724	1.45088	BNIP3P1	319138	ENSG00000197358	14	28264390	28265974	BCL2 interacting protein 3 pseudogene 1	1.33376	1.35486	0.324907		0.0778354	0.335947
1.0559	-0.854201	-0.854201	0.652504	BNIP3P5		ENSG00000260571	15	42313687	42314386		-0.710259	2.63051	0.787154		-0.0114522	0.330195
0.940585	0.787332	-0.828181	-0.899735	BNIP5	389384	ENSG00000189325	6	36315761	36336888	BCL2 interacting protein 5	-3.94305	0.36934	1.319e-26	5.22802e-25	-3.87378	0.369819
1.01026	0.647165	-0.522912	-1.13451	BNIPL	149428	ENSG00000163141	1	151036321	151047720	BCL2 interacting protein like	-0.812801	0.551261	0.140363	0.257926	-0.262248	0.380444
-1.09761	-0.593149	0.761403	0.929353	BOD1	91272	ENSG00000145919	5	173607145	173616659	biorientation of chromosomes in cell division 1	0.46092	0.0983834	2.80046e-06	1.68363e-05	0.44047	0.0982854
1.14717	0.207955	-0.0764828	-1.27864	BOD1L1	259282	ENSG00000038219	4	13568738	13627725	biorientation of chromosomes in cell division 1 like 1	-0.20682	0.0855222	0.0155923	0.0417178	-0.195633	0.0838605
-0.985828	-0.703817	1.07431	0.615331	BOK	666	ENSG00000176720	2	241551424	241574131	BCL2 family apoptosis regulator BOK	0.336083	0.135704	0.0132647	0.0363583	0.300632	0.132507
-0.211746	-1.22825	0.267354	1.17264	BOLA1	51027	ENSG00000178096	1	149887890	149900798	bolA family member 1	0.165912	0.330668	0.615845	0.752099	0.0852006	0.240027
0.355444	-1.43141	0.888598	0.187371	BOLA2-SMG1P6	107282092	ENSG00000261740	16	29443230	29454651	BOLA2-SMG1P6 readthrough	0.219661	0.2617	0.401265	0.564736	0.140514	0.215232
-1.33923	-0.17597	0.874994	0.640211	BOLA3	388962	ENSG00000163170	2	74135400	74147912	bolA family member 3	0.487774	0.140808	0.000532005	0.00208217	0.445636	0.140687
0.419062	-1.44543	0.835991	0.190375	BOLA3-DT	100507171	ENSG00000225439	2	74148007	74151952	BOLA3 divergent transcript	0.218404	0.580149	0.706573	0.818799	0.0551313	0.292886
-0.916557	-0.808547	0.767203	0.957901	BOP1	23246	ENSG00000261236	8	144262045	144291438	BOP1 ribosomal biogenesis factor	0.779137	0.106725	2.86942e-13	4.18903e-12	0.757547	0.107416
-1.4208	0.120019	0.404534	0.896251	BORA	79866	ENSG00000136122	13	72727749	72756198	BORA aurora kinase A activator	0.0853893	0.103799	0.410714	0.573064	0.0780905	0.0994665
-0.821377	-0.834679	1.18677	0.469287	BORCS5	118426	ENSG00000165714	12	12357078	12471233	BLOC-1 related complex subunit 5	0.313649	0.168746	0.0630684	0.135263	0.262273	0.160687
-0.643634	1.10241	-1.02475	0.565976	BORCS6	54785	ENSG00000196544	17	8188345	8190180	BLOC-1 related complex subunit 6	-0.0649205	0.235597	0.782888	0.871075	-0.0430395	0.193132
0.325517	-1.42385	0.912164	0.186165	BORCS7	119032	ENSG00000166275	10	102854259	102864961	BLOC-1 related complex subunit 7	0.0211637	0.105118	0.840438	0.910421	0.0190264	0.100238
-0.329969	-0.898821	1.42934	-0.200552	BORCS8	729991	ENSG00000254901	19	19176903	19192591	BLOC-1 related complex subunit 8	0.101619	0.282887	0.71943	0.827243	0.0597168	0.217648
-0.471275	1.47102	-0.738903	-0.260837	BPGM	669	ENSG00000172331	7	134646811	134679816	bisphosphoglycerate mutase	-0.105065	0.167163	0.529663	0.681692	-0.0841891	0.150842
0.848544	0.748511	-1.26991	-0.327141	BPHL	670	ENSG00000137274	6	3118374	3153578	biphenyl hydrolase like	-0.281457	0.166179	0.0903229	0.181448	-0.234361	0.156908
0.621697	1.07979	-0.850746	-0.850746	BPIFA2	140683	ENSG00000131050	20	33161768	33181412	BPI fold containing family A member 2	-3.96833	2.48222	0.109887		-0.0619565	0.339466
-1.05317	-0.330143	0.0493785	1.33394	BPIFB1	92747	ENSG00000125999	20	33273480	33309871	BPI fold containing family B member 1	0.370115	0.931129	0.691006	0.807972	0.0424606	0.316653
0.611368	-0.23916	-1.30408	0.931877	BPNT1	10380	ENSG00000162813	1	220057482	220090462	3'(2'), 5'-bisphosphate nucleotidase 1	-0.022127	0.098742	0.822688	0.897598	-0.0202289	0.0946384
-0.774698	-0.940669	1.00557	0.709792	BPNT2	54928	ENSG00000104331	8	56957931	56993867	3'(2'), 5'-bisphosphate nucleotidase 2	0.397445	0.0585659	1.15049e-11	1.42119e-10	0.39054	0.0584647
0.0519204	-1.17266	1.2654	-0.144668	BPTF	2186	ENSG00000171634	17	67825503	67984378	bromodomain PHD finger transcription factor	0.124995	0.0750305	0.0957294	0.19008	0.119335	0.0734894
1.11779	0.414915	-0.317009	-1.21569	BRAF	673	ENSG00000157764	7	140719327	140924929	B-Raf proto-oncogene, serine/threonine kinase	-0.237081	0.102868	0.0211824	0.0541981	-0.219551	0.100352
0.5678	0.962202	-0.225872	-1.30413	BRAP	8315	ENSG00000089234	12	111642146	111685956	BRCA1 associated protein	-0.0625528	0.0864709	0.469436	0.627728	-0.0585689	0.0838189
0.67771	0.643958	-1.45223	0.130565	BRAT1	221927	ENSG00000106009	7	2537810	2555694	BRCA1 associated ATM activator 1	-0.086851	0.0966469	0.368843	0.531939	-0.0800494	0.0930881
-0.741006	-0.973896	0.983924	0.730978	BRCA1	672	ENSG00000012048	17	43044295	43170245	BRCA1 DNA repair associated	0.652929	0.0812455	9.24427e-16	1.71835e-14	0.639664	0.0814774
1.12433	0.297232	-0.14638	-1.27519	BRCA1P1		ENSG00000267595	17	43168170	43168249		-0.413962	2.34659	0.859972		-0.0081322	0.329423
-0.736505	-0.898638	1.21328	0.421868	BRCA2	675	ENSG00000139618	13	32315086	32400268	BRCA2 DNA repair associated	0.628342	0.10578	2.84918e-09	2.63862e-08	0.605409	0.106288
-0.917013	-0.813367	0.850818	0.879562	BRCC3	79184	ENSG00000185515	X	155071420	155123077	BRCA1/BRCA2-containing complex subunit 3	0.439241	0.0640975	7.24698e-12	9.14058e-11	0.430597	0.0640453
0.2539	-1.29303	-0.0819861	1.12111	BRCC3P1	100421311	ENSG00000251667	5	176308063	176309013	BRCA1/BRCA2-containing complex subunit 3 pseudogene 1	0.495592	0.818077	0.544647	0.694894	0.0726892	0.317494
-0.331771	1.43306	-0.211626	-0.889659	BRD1	23774	ENSG00000100425	22	49773283	49827873	bromodomain containing 1	-0.034801	0.0918483	0.704765	0.817214	-0.0322594	0.0885989
0.411559	1.08974	-1.25865	-0.242647	BRD2	6046	ENSG00000204256	6	32968594	32981505	bromodomain containing 2	-0.12271	0.0555002	0.0270372	0.0667974	-0.118998	0.0548833
0.929258	0.593129	-1.32059	-0.201799	BRD3	8019	ENSG00000169925	9	134030305	134068535	bromodomain containing 3	-0.209288	0.105397	0.0470653	0.106236	-0.19261	0.102258
1.3607	-0.422623	-0.983764	0.0456856	BRD3OS	266655	ENSG00000235106	9	134025481	134034666	BRD3 opposite strand	-0.145667	0.170164	0.391977	0.555732	-0.116718	0.154007
-1.14522	-0.529957	0.790129	0.885049	BRD4	23476	ENSG00000141867	19	15235519	15332545	bromodomain containing 4	0.113566	0.078063	0.145724	0.265428	0.107985	0.0762976
-1.02637	-0.684047	0.766128	0.944292	BRD7	29117	ENSG00000166164	16	50313487	50368988	bromodomain containing 7	0.315264	0.0728054	1.48952e-05	7.92428e-05	0.305014	0.0723226
-0.871769	-0.847008	0.708563	1.01022	BRD7P2	647076	ENSG00000184100	3	160100850	160102793	bromodomain containing 7 pseudogene 2	0.960176	0.627342	0.125881	0.236733	0.257321	0.399252
-0.835205	-0.256895	-0.359514	1.45162	BRD7P4		ENSG00000218676	6	111430260	111431781		1.33437	2.07563	0.520304		0.0334456	0.330939
-1.10424	0.0448013	-0.25048	1.30992	BRD8	10902	ENSG00000112983	5	138139770	138178953	bromodomain containing 8	0.0135198	0.0752646	0.857443	0.921384	0.0133432	0.0734173
-1.09017	-0.222426	-0.0147398	1.32734	BRD9	65980	ENSG00000028310	5	850291	892801	bromodomain containing 9	0.124222	0.0808167	0.124274	0.234417	0.117754	0.0789129
-1.48734	0.655444	0.337929	0.49397	BRF1	2972	ENSG00000185024	14	105209286	105315589	BRF1 RNA polymerase III transcription initiation factor subunit	0.0458654	0.119482	0.701075	0.814609	0.0407765	0.112633
-1.08888	-0.607753	0.901728	0.794903	BRF2	55290	ENSG00000104221	8	37843268	37849861	BRF2 RNA polymerase III transcription initiation factor subunit	0.294731	0.156592	0.059814	0.129424	0.251589	0.149656
0.819881	0.908575	-0.929452	-0.799004	BRI3	25798	ENSG00000164713	7	98252379	98310441	brain protein I3	-0.544835	0.114509	1.95512e-06	1.20423e-05	-0.516853	0.114782
-0.79451	-0.928632	0.965942	0.7572	BRI3BP	140707	ENSG00000184992	12	124993645	125031231	BRI3 binding protein	0.397363	0.0525081	3.80035e-14	6.08407e-13	0.391615	0.0524366
-0.576048	1.41216	-0.820819	-0.0152912	BRICD5	283870	ENSG00000182685	16	2209253	2210905	BRICHOS domain containing 5	-0.24021	0.355772	0.499561	0.655298	-0.114888	0.254471
-0.738611	-0.778606	1.34905	0.168164	BRIP1	83990	ENSG00000136492	17	61679139	61863559	BRCA1 interacting helicase 1	0.14325	0.0959188	0.135319	0.250955	0.13304	0.0929336
-0.867034	-0.862723	0.801894	0.927862	BRIX1	55299	ENSG00000113460	5	34915677	34925996	biogenesis of ribosomes BRX1	0.830033	0.0663455	6.51903e-36	4.39597e-34	0.82159	0.0665042
1.25674	-0.759976	0.351474	-0.848238	BRK1	55845	ENSG00000254999	3	10115675	10127190	BRICK1 subunit of SCAR/WAVE actin nucleating complex	-0.00478111	0.0679005	0.943865	0.971493	-0.00448633	0.066525
-1.45982	0.59189	0.700353	0.167582	BRME1	79173	ENSG00000132016	19	13882348	13906452	break repair meiotic recombinase recruitment factor 1	0.184763	0.315044	0.557562	0.705478	0.099469	0.236087
-0.978553	-0.745185	0.834539	0.8892	BRMS1	25855	ENSG00000174744	11	66337333	66345125	BRMS1 transcriptional repressor and anoikis regulator	0.550944	0.0996482	3.22262e-08	2.57826e-07	0.530056	0.0999127
-0.930857	-0.788743	0.731583	0.988016	BRMS1L	84312	ENSG00000100916	14	35826338	35932325	BRMS1 like transcriptional repressor	0.413061	0.129938	0.00147832	0.00525748	0.378159	0.128665
0.997374	0.723781	-0.870516	-0.850639	BROX	148362	ENSG00000162819	1	222712553	222735196	BRO1 domain and CAAX motif containing	-0.303794	0.0778561	9.54056e-05	0.000436841	-0.292174	0.0771683
-1.04052	-0.600505	0.49631	1.14472	BRPF1	7862	ENSG00000156983	3	9731729	9748019	bromodomain and PHD finger containing 1	0.255943	0.110263	0.0202755	0.0521949	0.235384	0.107482
1.17742	-1.09606	0.411544	-0.492901	BRPF3	27154	ENSG00000096070	6	36196744	36232790	bromodomain and PHD finger containing 3	-0.00626192	0.0872214	0.942766	0.971069	-0.00577312	0.0843476
1.3012	-1.05192	-0.415573	0.166296	BRPF3-AS1		ENSG00000246982	6	36146698	36197205		-0.166342	0.827675	0.840718	0.910421	-0.0230357	0.309339
1.30397	-0.3928	-1.05984	0.148669	BRSK2	9024	ENSG00000174672	11	1389899	1462689	BR serine/threonine kinase 2	-0.405742	0.79391	0.609303	0.746979	-0.0614888	0.313298
1.23809	-0.933885	0.371693	-0.675898	BRWD1	54014	ENSG00000185658	21	39184176	39321559	bromodomain and WD repeat domain containing 1	-0.0412978	0.0865407	0.633215	0.764906	-0.0383855	0.083768
1.28847	0.288856	-0.70979	-0.867533	BRWD3	254065	ENSG00000165288	X	80669503	80809877	bromodomain and WD repeat domain containing 3	-0.392317	0.0978308	6.06777e-05	0.000289222	-0.372417	0.0971769
-0.112817	1.43277	-0.837904	-0.482046	BSCL2	26580	ENSG00000168000	11	62689289	62709845	BSCL2 lipid droplet biogenesis associated, seipin	-0.416914	0.252418	0.0986002	0.194762	-0.294279	0.232541
0.746994	0.956173	-1.04824	-0.65493	BSDC1	55108	ENSG00000160058	1	32364633	32394731	BSD domain containing 1	-0.375014	0.0865477	1.47066e-05	7.8293e-05	-0.359564	0.086061
0.00448734	0.772276	-1.41354	0.636775	BSG	682	ENSG00000172270	19	571277	583494	basigin (Ok blood group)	-0.041929	0.0597422	0.482784	0.639755	-0.0404567	0.0588201
-0.742416	-0.763725	1.35777	0.148375	BSG-AS1	105372233	ENSG00000267751	19	562360	572228	BSG antisense RNA 1	0.269486	0.420554	0.52166	0.674572	0.107285	0.273279
-1.47745	0.389861	0.351774	0.735811	BSN	8927	ENSG00000164061	3	49554477	49671549	bassoon presynaptic cytomatrix protein	0.267075	0.503948	0.596136	0.736927	0.0829383	0.286791
-1.24936	-0.124588	0.197222	1.17673	BSPRY	54836	ENSG00000119411	9	113349541	113371233	B-box and SPRY domain containing	0.109211	0.104534	0.296143	0.454843	0.0998741	0.100313
0.0303911	1.31069	-1.10753	-0.233555	BST1	683	ENSG00000109743	4	15703065	15738313	bone marrow stromal cell antigen 1	-0.412276	0.5476	0.451523	0.610274	-0.115312	0.303061
0.96581	0.732766	-1.05867	-0.639905	BST2	684	ENSG00000130303	19	17402939	17405630	bone marrow stromal cell antigen 2	-1.1461	0.11767	2.03571e-22	6.10987e-21	-1.12504	0.118312
-0.270267	-1.2591	1.05806	0.471307	BTAF1	9044	ENSG00000095564	10	91923770	92031437	B-TFIID TATA-box binding protein associated factor 1	0.180012	0.0781681	0.0212851	0.0543984	0.171721	0.076727
-1.05532	-0.639396	0.991285	0.703435	BTBD1	53339	ENSG00000064726	15	83016423	83067252	BTB domain containing 1	0.385382	0.0674045	1.08135e-08	9.24489e-08	0.376008	0.0672434
0.845276	0.865171	-1.04781	-0.662641	BTBD10	84280	ENSG00000148925	11	13388008	13463297	BTB domain containing 10	-0.210374	0.0860066	0.014444	0.0390682	-0.199005	0.0843474
0.622554	1.07215	-0.731381	-0.963325	BTBD11	121551	ENSG00000151136	12	107318421	107659642	ankyrin repeat and BTB domain containing 3	-0.174734	0.11835	0.139832	0.257148	-0.156699	0.113315
-0.309673	1.43521	-0.238085	-0.887456	BTBD16	118663	ENSG00000138152	10	122271296	122338159	BTB domain containing 16	-0.812232	0.51086	0.111851	0.215418	-0.30135	0.39372
0.937546	0.452003	-0.00510948	-1.38444	BTBD19	149478	ENSG00000222009	1	44808523	44815585	BTB domain containing 19	-0.651153	0.368164	0.0769527	0.159401	-0.369966	0.339415
-0.715061	-0.600577	-0.136707	1.45235	BTBD2	55643	ENSG00000133243	19	1985438	2034881	BTB domain containing 2	0.0609787	0.0807865	0.450361	0.609124	0.0577021	0.0785922
-0.975193	-0.706347	1.10181	0.579732	BTBD3	22903	ENSG00000132640	20	11890723	11926609	BTB domain containing 3	0.554251	0.108154	2.98114e-07	2.08613e-06	0.529645	0.108521
0.0243075	-1.36279	0.318209	1.02027	BTBD6	90135	ENSG00000184887	14	105248533	105251093	BTB domain containing 6	0.18858	0.115393	0.102208	0.200087	0.170858	0.110859
0.616853	-0.277833	0.945127	-1.28415	BTBD7	55727	ENSG00000011114	14	93237550	93333092	BTB domain containing 7	-0.0296634	0.0814687	0.715777	0.825107	-0.0279002	0.0791546
0.814753	0.711297	-0.186042	-1.34001	BTBD8	284697	ENSG00000189195	1	92080305	92184725	BTB domain containing 8	-0.4456	0.21237	0.035885	0.0847968	-0.353068	0.205119
0.617415	1.08297	-0.862699	-0.837688	BTBD9	114781	ENSG00000183826	6	38168451	38640148	BTB domain containing 9	-0.129415	0.136892	0.344465	0.507063	-0.111371	0.128031
0.963739	0.74626	-0.693358	-1.01664	BTC	685	ENSG00000174808	4	74744759	74794523	betacellulin	-0.946942	0.219763	1.64052e-05	8.60998e-05	-0.860185	0.225827
-0.687705	-0.294306	1.48052	-0.498507	BTD	686	ENSG00000169814	3	15601341	15722311	biotinidase	0.085978	0.132456	0.516271	0.669409	0.0746024	0.12372
-1.22368	0.882265	-0.406327	0.747741	BTF3	689	ENSG00000145741	5	73498408	73505667	basic transcription factor 3	0.0157894	0.0542951	0.771199	0.863125	0.0154564	0.0535923
-1.28879	0.158413	1.14616	-0.0157845	BTF3-DT		ENSG00000272525	5	73497550	73498293		0.698416	0.932879	0.454057	0.612675	0.0800966	0.32588
0.33536	1.13752	-0.232004	-1.24087	BTF3L4	91408	ENSG00000134717	1	52056199	52090716	basic transcription factor 3 like 4	-0.142878	0.0958334	0.135988	0.251877	-0.132572	0.0928759
-1.26592	0.341914	1.11532	-0.191307	BTF3L4P2		ENSG00000213189	2	159003975	159004320		0.26149	0.553394	0.636556	0.767642	0.070635	0.292411
0.244889	0.776447	-1.46345	0.442116	BTF3P10		ENSG00000231120	6	149977922	149978416		-1.03972	2.27699	0.647944		-0.0218088	0.330171
0.879262	0.316346	0.242459	-1.43807	BTF3P4		ENSG00000224820	9	72107818	72108312		-1.71484	2.61988	0.512757		-0.0265208	0.331587
-1.22099	1.18857	-0.20283	0.235252	BTF3P5		ENSG00000233594	2	55435156	55435622		0.00117718	1.64217	0.999428		0.000198978	0.32602
0.355216	-0.805399	1.25558	-0.805399	BTF3P6	100499261	ENSG00000233956	21	33518610	33519108	basic transcription factor 3 pseudogene 6	1.60715	3.91082	0.681109		0.0110222	0.331867
0.868083	0.852496	-1.0008	-0.719784	BTG1	694	ENSG00000133639	12	92140278	92145846	BTG anti-proliferation factor 1	-0.509628	0.0616872	1.43856e-16	2.85458e-15	-0.501507	0.0617102
1.35951	-0.0241874	-0.307364	-1.02795	BTG1-DT		ENSG00000245904	12	92145573	92226557		-0.606402	1.63426	0.710595		-0.0241091	0.32713
-0.161238	0.233619	1.17145	-1.24383	BTG2	7832	ENSG00000159388	1	203305491	203309602	BTG anti-proliferation factor 2	-0.00425821	0.0745307	0.954439	0.976441	-0.00403008	0.0727446
-0.703033	-1.00582	0.984755	0.724101	BTG3	10950	ENSG00000154640	21	17593653	17612945	BTG anti-proliferation factor 3	0.247572	0.0936825	0.00822545	0.0238377	0.232813	0.0919101
0.132694	-1.39938	0.966411	0.300279	BTG3-AS1	110806272	ENSG00000280594	21	17611708	17633199	BTG3 antisense RNA 1	0.647974	1.19112	0.586439		0.0478667	0.32497
-0.945458	-0.761112	0.665363	1.04121	BTN1A1	696	ENSG00000124557	6	26500303	26510425	butyrophilin subfamily 1 member A1	2.65264	0.779664	0.000668233	0.0025657	2.11614	0.870793
1.05359	0.643497	-0.714716	-0.982368	BTN2A1	11120	ENSG00000112763	6	26457904	26476621	butyrophilin subfamily 2 member A1	-0.348664	0.103004	0.00071192	0.00271937	-0.327368	0.101843
0.227868	1.29747	-0.987748	-0.53759	BTN2A2	10385	ENSG00000124508	6	26383096	26394874	butyrophilin subfamily 2 member A2	-0.437259	0.202549	0.0308673	0.0745617	-0.353133	0.196274
-0.031981	1.12339	0.209734	-1.30115	BTN2A3P	54718	ENSG00000124549	6	26421391	26432383	butyrophilin subfamily 2 member A3, pseudogene	-0.131998	0.256835	0.607292	0.745746	-0.0833067	0.206881
0.573186	1.1122	-0.75839	-0.926994	BTN3A1	11119	ENSG00000026950	6	26402237	26415208	butyrophilin subfamily 3 member A1	-0.485722	0.170176	0.00431418	0.0135954	-0.424128	0.168997
0.855515	0.869173	-0.974943	-0.749745	BTN3A2	11118	ENSG00000186470	6	26365159	26378320	butyrophilin subfamily 3 member A2	-0.259051	0.127684	0.0424743	0.0973977	-0.23144	0.123281
0.64852	1.03022	-0.605947	-1.0728	BTN3A3	10384	ENSG00000111801	6	26440472	26453415	butyrophilin subfamily 3 member A3	-0.927009	0.199004	3.18915e-06	1.89711e-05	-0.85543	0.203764
1.25355	0.220357	-0.353633	-1.12027	BTNL3	10917	ENSG00000168903	5	180988846	181006727	butyrophilin like 3	-1.84661	1.50678	0.220374		-0.0892011	0.342019
1.19981	0.44713	-0.776982	-0.869959	BTNL8	79908	ENSG00000113303	5	180899077	180950906	butyrophilin like 8	-1.62527	0.768355	0.0344075	0.0818143	-0.398282	0.625686
-0.943676	-0.295191	1.41156	-0.172697	BTNL9	153579	ENSG00000165810	5	181040225	181061521	butyrophilin like 9	0.27308	0.275386	0.321381	0.482567	0.17015	0.227668
1.47324	-0.25819	-0.71876	-0.496286	BTRC	8945	ENSG00000166167	10	101354033	101557321	beta-transducin repeat containing E3 ubiquitin protein ligase	-0.0706528	0.101597	0.486792	0.643424	-0.0646268	0.0973552
-0.981629	-0.741405	0.827597	0.895437	BUB1	699	ENSG00000169679	2	110637528	110678063	BUB1 mitotic checkpoint serine/threonine kinase	0.507413	0.0624214	4.33456e-16	8.29477e-15	0.499078	0.0624633
-0.951208	-0.775038	0.910858	0.815388	BUB1B	701	ENSG00000156970	15	40161023	40221123	BUB1 mitotic checkpoint serine/threonine kinase B	0.509397	0.0725435	2.18799e-12	2.95597e-11	0.498244	0.0726067
-1.12159	-0.564373	0.876621	0.809347	BUB3	9184	ENSG00000154473	10	123154402	123170467	BUB3 mitotic checkpoint protein	0.42544	0.0640606	3.11119e-11	3.64384e-10	0.416834	0.0640024
-0.742665	-0.831759	0.278675	1.29575	BUD13	84811	ENSG00000137656	11	116748170	116772987	BUD13 homolog	0.418434	0.136368	0.00215197	0.0073415	0.37986	0.134854
1.15498	-0.693683	0.503659	-0.964959	BUD13P1		ENSG00000270689	11	95143637	95145125		-0.633379	1.66733	0.704037		-0.0242762	0.327408
-0.886073	-0.783543	0.512997	1.15662	BUD23	114049	ENSG00000071462	7	73683025	73705161	BUD23 rRNA methyltransferase and ribosome maturation factor	0.282239	0.0928314	0.00236308	0.00797611	0.26659	0.0914461
-0.53972	1.31381	-0.97142	0.197325	BUD31	8896	ENSG00000106245	7	99408641	99419616	BUD31 homolog	-0.0575662	0.0869037	0.507706	0.662356	-0.053847	0.0842096
0.388107	-0.187622	1.08172	-1.28221	BVES	11149	ENSG00000112276	6	105096822	105137157	blood vessel epicardial substance	-0.0683201	1.59625	0.965861		-0.00267848	0.325598
-0.880872	-0.850663	0.839997	0.891538	BYSL	705	ENSG00000112578	6	41921499	41933046	bystin like	0.478974	0.105023	5.09936e-06	2.9376e-05	0.45564	0.104934
-0.806211	-0.920803	0.789832	0.937182	BZW1	9689	ENSG00000082153	2	200810594	200827338	basic leucine zipper and W2 domains 1	0.310456	0.0514869	1.64155e-09	1.57744e-08	0.305541	0.0513087
-0.8092	-0.920204	0.825952	0.903451	BZW1P2		ENSG00000198406	3	116645902	116646727		0.558857	0.251682	0.0263857	0.0653435	0.425438	0.247705
-1.01584	-0.696781	0.766764	0.945855	BZW2	28969	ENSG00000136261	7	16646131	16706523	basic leucine zipper and W2 domains 2	0.535753	0.0680484	3.459e-15	6.12979e-14	0.526021	0.0681372
-1.12	-0.458448	1.16981	0.408636	C10orf143	387723	ENSG00000237489	10	130020025	130110830	chromosome 10 open reading frame 143	1.07054	0.54214	0.0483065	0.108611	0.443871	0.524193
0.606454	-1.48995	0.336961	0.54654	C10orf55	414236	ENSG00000222047	10	73909969	73922777	chromosome 10 putative open reading frame 55	0.405893	0.941809	0.666489	0.789798	0.0462014	0.317485
1.03007	0.20345	0.137156	-1.37068	C10orf82	143379	ENSG00000165863	10	116663696	116670264	chromosome 10 open reading frame 82	-2.00577	2.498	0.422002		-0.0344452	0.332413
-0.0104151	1.38027	-0.405198	-0.964656	C10orf88	80007	ENSG00000119965	10	122930901	122954311	chromosome 10 open reading frame 88	-0.229219	0.157549	0.145695	0.265407	-0.191989	0.147861
1.30513	0.255872	-0.700545	-0.860461	C10orf88B		ENSG00000255624	10	122879681	122898716		-0.258807	0.255034	0.310204	0.470684	-0.170114	0.215435
-0.397382	1.24036	0.267085	-1.11007	C10orf95	79946	ENSG00000120055	10	102449837	102451543	chromosome 10 open reading frame 95	-0.262284	0.521056	0.614705	0.751313	-0.0766085	0.288531
-0.815826	-0.913309	0.916257	0.812878	C10orf95-AS1	100505761	ENSG00000269609	10	102449816	102461106	C10orf95 antisense RNA 1	0.57356	0.240294	0.0169904	0.0449033	0.450202	0.238781
-0.568907	-1.04605	0.434594	1.18036	C11orf1	64776	ENSG00000137720	11	111878935	111885975	cilia and flagella associated protein 68	0.200409	0.155082	0.196262	0.333935	0.168114	0.14461
-0.90656	-0.818918	0.765562	0.959915	C11orf24	53838	ENSG00000171067	11	68261338	68272001	chromosome 11 open reading frame 24	0.671602	0.0997662	1.67619e-11	2.02717e-10	0.651625	0.100254
0.540882	0.859501	-1.4031	0.00272029	C11orf45	219833	ENSG00000174370	11	128899565	128906044	KCNJ5 antisense RNA 1	-0.329747	0.467843	0.48092	0.637981	-0.114645	0.286881
0.735995	0.977472	-0.988785	-0.724682	C11orf49	79096	ENSG00000149179	11	46936689	47164385	centriolar satellite-associated tubulin polyglutamylase complex regulator 1	-0.47118	0.137704	0.000622347	0.00240613	-0.430838	0.137131
-0.0257021	1.02362	0.353569	-1.35149	C11orf52	91894	ENSG00000149300	11	111918032	111926871	chromosome 11 open reading frame 52	-0.18911	1.74529	0.913715		-0.00648271	0.326794
-0.252541	-0.344404	1.44726	-0.850318	C11orf53	341032	ENSG00000150750	11	111245725	111286401	POU class 2 homeobox associating factor 2	0.16529	1.13316	0.884027		0.0133576	0.319496
1.1903	0.316537	-0.336464	-1.17037	C11orf54	28970	ENSG00000182919	11	93741591	93764749	chromosome 11 open reading frame 54	-0.254471	0.112518	0.0237222	0.0597543	-0.232944	0.10948
-1.4382	0.515841	0.114672	0.807682	C11orf58	10944	ENSG00000110696	11	16613132	16758340	chromosome 11 open reading frame 58	0.0212661	0.0631163	0.736165	0.839231	0.0205775	0.0620216
-1.31585	0.658297	-0.227554	0.885104	C11orf65	160140	ENSG00000166323	11	108308519	108467531	chromosome 11 open reading frame 65	0.10471	0.593227	0.859894	0.922487	0.0254492	0.291135
-1.31606	-0.0611463	1.08604	0.291168	C11orf68	83638	ENSG00000175573	11	65916810	65919062	chromosome 11 open reading frame 68	0.0425913	0.142953	0.76575	0.859125	0.0362507	0.131537
0.23986	0.896632	0.295672	-1.43216	C11orf71	54494	ENSG00000180425	11	114391443	114400511	chromosome 11 open reading frame 71	-0.175881	0.274962	0.522397	0.674965	-0.106179	0.218367
0.847318	0.830052	-1.14387	-0.533495	C11orf80	79703	ENSG00000173715	11	66744451	66843516	chromosome 11 open reading frame 80	-0.290328	0.180825	0.108367	0.209772	-0.234698	0.169125
1.23846	0.304886	-0.469749	-1.07359	C11orf86	254439	ENSG00000173237	11	66975277	66977009	chromosome 11 open reading frame 86	-1.95474	0.92507	0.0345947	0.0821843	-0.305491	0.517875
-0.947877	-0.160752	-0.300425	1.40905	C11orf94	143678	ENSG00000234776	11	45906513	45907272	Frey regulator of sperm-oocyte fusion 1	1.02451	2.17965	0.63833		0.0232721	0.330019
0.936411	0.367329	-1.4063	0.102563	C11orf96	387763	ENSG00000187479	11	43925342	43943878	chromosome 11 open reading frame 96	-1.8085	2.66438	0.497283		-0.028407	0.331941
-0.0683666	-1.06832	-0.208823	1.34551	C11orf98	102288414	ENSG00000278615	11	62662817	62665210	chromosome 11 open reading frame 98	0.385053	0.560047	0.491744	0.648101	0.101955	0.300683
-0.887741	-0.840199	0.944878	0.783063	C12orf29	91298	ENSG00000133641	12	88033846	88050160	chromosome 12 open reading frame 29	0.277111	0.0816917	0.000693455	0.00265339	0.265074	0.0807446
-0.201076	0.376683	1.09589	-1.2715	C12orf4	57102	ENSG00000047621	12	4487735	4538508	chromosome 12 open reading frame 4	-0.0208115	0.159129	0.895946	0.944354	-0.0167481	0.143696
-0.597708	-1.09132	0.731897	0.957129	C12orf43	64897	ENSG00000157895	12	121000486	121016502	chromosome 12 open reading frame 43	0.46619	0.119071	9.03239e-05	0.000415282	0.43635	0.118666
0.696135	-1.39685	0.749544	-0.0488271	C12orf50	160419	ENSG00000165805	12	87980035	88034037	chromosome 12 open reading frame 50	0.419415	2.32611	0.856911		0.00862325	0.329334
-0.996159	-0.694691	1.06404	0.626808	C12orf57	113246	ENSG00000111678	12	6942978	6946003	chromosome 12 open reading frame 57	0.231658	0.125849	0.065657	0.139738	0.206972	0.121073
-1.09418	-0.0940264	-0.143466	1.33167	C12orf60	144608	ENSG00000182993	12	14803666	14906586	chromosome 12 open reading frame 60	0.172501	0.311485	0.579715	0.723924	0.0938488	0.233576
-1.01922	-0.343728	1.35758	0.00537415	C12orf73	728568	ENSG00000204954	12	103940763	103965708	ubiquinol-cytochrome c reductase complex assembly factor 6	0.221902	0.181519	0.221528	0.365855	0.176094	0.166037
0.047336	1.30108	-1.11909	-0.229319	C12orf75	387882	ENSG00000235162	12	105235290	105396097	chromosome 12 open reading frame 75	-0.0538003	0.0586419	0.358913	0.521819	-0.0521567	0.0577854
0.824998	0.9061	-0.863197	-0.867901	C12orf76	400073	ENSG00000174456	12	110027028	110073636	chromosome 12 open reading frame 76	-0.187688	0.179741	0.296386	0.455083	-0.148082	0.162866
0.0876678	1.32923	-0.375534	-1.04136	C13orf46	100507747	ENSG00000283199	13	113953705	113974076	chromosome 13 open reading frame 46	-1.95872	1.472	0.183304		-0.0987664	0.34562
-0.888756	-0.767982	0.476287	1.18045	C14orf119	55017	ENSG00000179933	14	23095505	23100456	chromosome 14 open reading frame 119	0.195038	0.0816792	0.0169469	0.0448035	0.185496	0.0801581
0.21275	-1.45512	0.80232	0.440051	C14orf132	56967	ENSG00000227051	14	96039362	96093971	chromosome 14 open reading frame 132	0.553274	0.602022	0.358081	0.520855	0.138989	0.320306
0.820315	0.906641	-0.946832	-0.780124	C14orf28	122525	ENSG00000179476	14	44897275	44907257	chromosome 14 open reading frame 28	-0.259467	0.267192	0.331504	0.493891	-0.164443	0.221869
0.651288	1.01416	-0.549502	-1.11595	C14orf93	60686	ENSG00000100802	14	22985894	23010166	chromosome 14 open reading frame 93	-0.39205	0.176497	0.026332	0.0652208	-0.329457	0.171131
0.799787	-1.46297	0.323021	0.340164	C15orf39	56905	ENSG00000167173	15	75195643	75212169	chromosome 15 open reading frame 39	0.0244697	0.0926364	0.791666	0.876397	0.0227986	0.0892299
-1.15782	-0.467467	1.05773	0.567565	C15orf40	123207	ENSG00000169609	15	82988441	83011641	chromosome 15 open reading frame 40	0.182198	0.153799	0.236155	0.383506	0.15226	0.143046
1.28504	0.296591	-0.720409	-0.861225	C15orf48	84419	ENSG00000166920	15	45430579	45448761	chromosome 15 open reading frame 48	-2.98513	0.644291	3.60046e-06	2.122e-05	-2.68128	0.68333
-0.75139	-0.894021	0.446907	1.1985	C15orf61	145853	ENSG00000189227	15	67521131	67530146	chromosome 15 open reading frame 61	0.321748	0.21727	0.138643	0.255639	0.24081	0.198459
0.781914	0.944568	-0.918155	-0.808327	C15orf62	643338	ENSG00000188277	15	40769980	40772449	chromosome 15 open reading frame 62	-1.30313	0.20551	2.28335e-10	2.42452e-09	-1.24344	0.209109
1.16017	0.326384	-1.21367	-0.272884	C15orf65	145788	ENSG00000261652	15	55408495	55418798	piercer of microtubule wall 2	-0.799113	0.424448	0.0597396	0.129299	-0.419901	0.403267
-0.489865	0.0422377	-0.929023	1.37665	C16orf46	123775	ENSG00000166455	16	81053497	81077267	chromosome 16 open reading frame 46	0.410909	1.36045	0.762623		0.0234933	0.324212
-1.01245	-0.652645	0.547321	1.11778	C16orf54	283897	ENSG00000185905	16	29742463	29745990	chromosome 16 open reading frame 54	2.38768	1.21264	0.0489531		0.197025	0.4064
0.863401	0.799986	-0.491744	-1.17164	C16orf72	29035	ENSG00000182831	16	9091644	9121635	HUWE1 associated protein modifying stress responses	-0.280495	0.0777699	0.000310081	0.00128154	-0.2693	0.0769822
0.927598	0.678041	-0.360788	-1.24485	C16orf74	404550	ENSG00000154102	16	85690084	85751129	chromosome 16 open reading frame 74	-0.373826	0.2474	0.130783	0.24424	-0.262608	0.223857
-0.273527	1.20612	-1.18587	0.253277	C16orf86	388284	ENSG00000159761	16	67666814	67668757	chromosome 16 open reading frame 86	-1.53369	2.12148	0.46972		-0.0366491	0.331693
-0.756007	-0.548865	-0.146268	1.45114	C16orf87	388272	ENSG00000155330	16	46796603	46831180	chromosome 16 open reading frame 87	0.147273	0.155509	0.343619	0.506392	0.122354	0.143201
-0.511862	-1.15094	0.955675	0.707125	C16orf91	283951	ENSG00000174109	16	1419752	1420756	ubiquinol-cytochrome c reductase complex assembly factor 4	0.510101	0.169748	0.00265539	0.00881939	0.449277	0.169045
0.713946	-1.35814	0.790197	-0.146	C16orf95	100506581	ENSG00000260456	16	87083562	87317420	chromosome 16 open reading frame 95	0.277624	0.77118	0.718848	0.826982	0.0445766	0.308671
-1.13817	-0.535372	0.930538	0.743002	C17orf100	388327	ENSG00000256806	17	6651762	6693202	chromosome 17 open reading frame 100	0.583003	0.407447	0.152467	0.274652	0.2754	0.327993
-0.14803	-0.290175	1.40187	-0.963664	C17orf107	100130311	ENSG00000205710	17	4899418	4902934	chromosome 17 open reading frame 107	0.179673	0.622252	0.772775	0.864267	0.0404537	0.295954
1.27338	0.314969	-0.699688	-0.888665	C17orf113	110806298	ENSG00000267221	17	42038232	42050601	chromosome 17 open reading frame 113	-0.546224	0.467346	0.242492	0.391676	-0.205098	0.320159
1.12433	0.297232	-0.14638	-1.27519	C17orf114		ENSG00000262165	17	4801159	4807013		-0.413962	2.34659	0.859972		-0.0081322	0.329423
-0.347401	1.4762	-0.741963	-0.386834	C17orf49	124944	ENSG00000258315	17	7014495	7017525	chromosome 17 open reading frame 49	-0.687432	0.680845	0.312652	0.473377	-0.140622	0.332069
-1.30398	-0.190696	0.47694	1.01774	C17orf58	284018	ENSG00000186665	17	67991099	67996469	chromosome 17 open reading frame 58	0.289688	0.188618	0.124577	0.234875	0.230175	0.175315
-0.597303	1.43262	-0.0698517	-0.765469	C17orf67	339210	ENSG00000214226	17	56791913	56838773	chromosome 17 open reading frame 67	-0.245356	0.53311	0.645347	0.774109	-0.0691168	0.288997
-0.0478975	1.35409	-1.04748	-0.258708	C17orf75	64149	ENSG00000108666	17	32324565	32350023	chromosome 17 open reading frame 75	-0.208471	0.126946	0.100548	0.197566	-0.184937	0.121518
-0.724385	-0.858602	0.298977	1.28401	C17orf80	55028	ENSG00000141219	17	73232233	73248959	chromosome 17 open reading frame 80	0.193262	0.126902	0.127778	0.239547	0.171406	0.121051
0.352446	-1.11541	-0.437236	1.2002	C17orf97	400566	ENSG00000187624	17	410325	431062	ligand of ATE1	0.412653	0.92691	0.656181	0.781687	0.0483142	0.317291
-1.02238	-0.692259	0.909835	0.804806	C18orf21	83608	ENSG00000141428	18	35972625	35979286	chromosome 18 open reading frame 21	0.3963	0.143268	0.00567246	0.0172645	0.354497	0.14104
0.58257	0.455261	0.459553	-1.49738	C18orf25	147339	ENSG00000152242	18	46173553	46266992	arkadia (RNF111) N-terminal like PKA signaling regulator 2N	-0.0722878	0.0941065	0.442398	0.602013	-0.0669352	0.0907653
1.45971	-0.487141	-0.204326	-0.768241	C18orf32	497661	ENSG00000177576	18	49477243	49487252	chromosome 18 open reading frame 32	-0.298254	0.310503	0.336779	0.499002	-0.16819	0.245377
-0.747796	-0.949163	1.07215	0.624808	C18orf54	162681	ENSG00000166845	18	54357906	54385218	chromosome 18 open reading frame 54	0.385337	0.147641	0.00905521	0.0259623	0.341521	0.144761
0.904159	-0.52746	0.769077	-1.14578	C19orf12	83636	ENSG00000131943	19	29698937	29715789	chromosome 19 open reading frame 12	-0.0144076	0.176183	0.934825	0.966981	-0.0110487	0.155701
-1.1809	-0.44459	0.604505	1.02098	C19orf25	148223	ENSG00000119559	19	1461143	1479219	chromosome 19 open reading frame 25	0.464889	0.136137	0.000638181	0.00246246	0.425799	0.135626
0.85305	0.86456	-0.701085	-1.01652	C19orf33	64073	ENSG00000167644	19	38304164	38305006	chromosome 19 open reading frame 33	-0.496601	0.185718	0.00749614	0.0219942	-0.42341	0.184049
0.331111	0.691001	0.461191	-1.4833	C19orf38	255809	ENSG00000214212	19	10836575	10869790	chromosome 19 open reading frame 38	-0.569612	1.8663	0.760206		-0.0173283	0.32811
1.36871	-0.249131	-0.091892	-1.02768	C19orf44	84167	ENSG00000105072	19	16496394	16521352	chromosome 19 open reading frame 44	-0.181478	0.278379	0.51446	0.66788	-0.108708	0.220119
-1.05924	-0.596843	1.10236	0.553722	C19orf47	126526	ENSG00000160392	19	40319536	40348527	chromosome 19 open reading frame 47	0.462509	0.170002	0.00651616	0.0195009	0.401981	0.168176
-1.02091	-0.694227	0.807889	0.90725	C19orf48	84798	ENSG00000167747	19	50797687	50804929	multidrug resistance-related protein	0.656972	0.0797842	1.80528e-16	3.54614e-15	0.644144	0.0800659
-1.1421	-0.493014	1.05812	0.577	C19orf53	28974	ENSG00000104979	19	13774456	13778773	chromosome 19 open reading frame 53	0.287409	0.0963579	0.00285695	0.0094066	0.270424	0.0949195
0.702041	0.990861	-1.06136	-0.631537	C19orf54	284325	ENSG00000188493	19	40740856	40751553	actin maturation protease	-0.376604	0.154412	0.0147296	0.0397234	-0.328787	0.150688
-0.928982	-0.373764	-0.106493	1.40924	C19orf73	55150	ENSG00000221916	19	49118402	49119143	chromosome 19 open reading frame 73	0.977762	1.07606	0.363536		0.0879037	0.33344
0.480136	-0.902493	-0.754684	1.17704	C1D	10438	ENSG00000197223	2	68041130	68110948	C1D nuclear receptor corepressor	0.0254328	0.111345	0.819324	0.895873	0.0229904	0.105567
0.70915	0.561397	-1.46437	0.193821	C1DP1		ENSG00000231245	10	32511336	32511737		-0.819311	1.1026	0.457438		-0.069877	0.328204
-0.777249	-0.911471	1.10819	0.580526	C1GALT1	56913	ENSG00000106392	7	7156934	7248616	core 1 synthase, glycoprotein-N-acetylgalactosamine 3-beta-galactosyltransferase 1	0.300786	0.079666	0.000159632	0.000700252	0.288828	0.078928
-0.402569	1.43272	-0.158238	-0.871909	C1GALT1C1	29071	ENSG00000171155	X	120625674	120630054	C1GALT1 specific chaperone 1	-0.0165127	0.0857748	0.847341	0.914821	-0.0154023	0.0830752
1.22006	-0.174197	-1.20638	0.160515	C1GALT1C1L	728819	ENSG00000223658	2	43675151	43676429	C1GALT1 specific chaperone 1 like	-0.203956	0.553524	0.712524	0.822513	-0.0543935	0.289124
-0.347808	-1.2398	0.591725	0.995884	C1GALT1P1		ENSG00000257818	12	69284397	69285485		1.09355	1.14803	0.340821		0.0881465	0.335385
-1.48365	0.494874	0.314024	0.674748	C1orf105	92346	ENSG00000180999	1	172420685	172468831	chromosome 1 open reading frame 105	0.716958	1.84349	0.69734		0.0223706	0.328486
-0.846161	-0.68742	0.203085	1.3305	C1orf109	54955	ENSG00000116922	1	37681570	37692249	chromosome 1 open reading frame 109	0.496428	0.135113	0.000238638	0.00100848	0.45783	0.134918
-0.922491	-0.804593	0.792019	0.935065	C1orf112	55732	ENSG00000000460	1	169662007	169854080	FIGNL1 interacting regulator of recombination and mitosis	0.517381	0.126404	4.25673e-05	0.000207859	0.483573	0.126531
1.35952	0.141752	-0.799207	-0.702061	C1orf115	79762	ENSG00000162817	1	220690363	220699153	chromosome 1 open reading frame 115	-0.276272	0.14656	0.0594244	0.128724	-0.239271	0.140202
0.895645	0.835419	-0.837219	-0.893845	C1orf116	79098	ENSG00000182795	1	207018522	207032756	chromosome 1 open reading frame 116	-1.75648	0.069654	2.59508e-140	3.67487e-137	-1.75126	0.0697439
-1.43715	0.0853355	0.75843	0.593384	C1orf122	127687	ENSG00000197982	1	37806979	37809454	chromosome 1 open reading frame 122	0.170714	0.131083	0.192803	0.329309	0.14973	0.124231
0.300797	1.28425	-0.837536	-0.747506	C1orf131	128061	ENSG00000143633	1	231223763	231241187	chromosome 1 open reading frame 131	-0.109162	0.108769	0.315566	0.47638	-0.098907	0.104025
-0.982694	0.350098	1.24141	-0.608812	C1orf159	54991	ENSG00000131591	1	1081818	1116361	chromosome 1 open reading frame 159	0.0933049	0.171523	0.586456	0.729301	0.0742433	0.153765
0.848117	0.85605	-0.633238	-1.07093	C1orf162	128346	ENSG00000143110	1	111473792	111478512	chromosome 1 open reading frame 162	-1.09852	0.755472	0.145924	0.265644	-0.205668	0.381001
0.885745	0.846078	-0.865912	-0.865912	C1orf167	284498	ENSG00000215910	1	11761787	11789585	chromosome 1 open reading frame 167	-5.09479	1.98646	0.0103246		-0.143937	0.376346
-0.815405	-0.913313	0.806308	0.92241	C1orf174	339448	ENSG00000198912	1	3889125	3900293	chromosome 1 open reading frame 174	0.267148	0.112764	0.0178322	0.046921	0.245109	0.10994
-0.844489	-0.877815	0.989824	0.73248	C1orf198	84886	ENSG00000119280	1	230837119	230869589	chromosome 1 open reading frame 198	0.149837	0.0837491	0.0735952	0.15359	0.141697	0.081792
-0.724494	-0.976124	0.655062	1.04555	C1orf21	81563	ENSG00000116667	1	184387029	184629019	chromosome 1 open reading frame 21	0.384604	0.0884708	1.3786e-05	7.36689e-05	0.368544	0.0879752
-1.37898	0.0493057	0.990378	0.339301	C1orf21-DT		ENSG00000271387	1	184385753	184386704		2.34439	2.31368	0.310931		0.0449624	0.333891
0.539417	0.564089	0.392167	-1.49567	C1orf210	149466	ENSG00000253313	1	43281877	43285617	chromosome 1 open reading frame 210	-0.179922	0.144302	0.212456	0.354741	-0.153562	0.135376
-0.841575	-0.876396	0.704114	1.01386	C1orf216	127703	ENSG00000142686	1	35713877	35718894	chromosome 1 open reading frame 216	0.72653	0.15958	5.29446e-06	3.03988e-05	0.675966	0.161619
1.18709	0.169086	-0.111254	-1.24493	C1orf220	400798	ENSG00000213057	1	178542752	178548889	chromosome 1 putative open reading frame 220	-0.624443	0.91753	0.496144	0.651914	-0.0738539	0.32303
0.814364	0.915562	-0.831527	-0.898399	C1orf226	400793	ENSG00000239887	1	162378841	162386812	chromosome 1 open reading frame 226	-0.757162	0.102337	1.37489e-13	2.06925e-12	-0.736854	0.102941
-1.06757	-0.0933837	-0.186881	1.34783	C1orf35	79169	ENSG00000143793	1	228100726	228105411	chromosome 1 open reading frame 35	0.236521	0.17405	0.17417	0.304352	0.191808	0.161108
-1.12538	-0.46385	0.437172	1.15206	C1orf43	25912	ENSG00000143612	1	154206696	154220637	chromosome 1 open reading frame 43	0.149192	0.0595545	0.0122405	0.0339211	0.144894	0.058849
-0.531971	-0.201822	1.46395	-0.730156	C1orf50	79078	ENSG00000164008	1	42767245	42779491	chromosome 1 open reading frame 50	0.082583	0.268642	0.758532	0.853917	0.0504532	0.210478
0.365678	1.01096	-1.35789	-0.0187479	C1orf52	148423	ENSG00000162642	1	85249953	85259672	chromosome 1 open reading frame 52	-0.0526681	0.124404	0.672031	0.79401	-0.0462012	0.116718
-1.1077	1.04368	-0.551801	0.615822	C1orf53	388722	ENSG00000203724	1	197902630	197907367	chromosome 1 open reading frame 53	0.0371141	0.418713	0.929369	0.96382	0.014725	0.260915
0.565219	1.1215	-0.832018	-0.854701	C1orf54	79630	ENSG00000118292	1	150268200	150280916	chromosome 1 open reading frame 54	-1.2175	0.700126	0.0820398	0.167906	-0.287923	0.446633
0.837051	-1.28145	-0.306244	0.750638	C1orf56	54964	ENSG00000143443	1	151047751	151051986	chromosome 1 open reading frame 56	0.0445098	0.328384	0.892183	0.942334	0.0229551	0.2339
1.19305	0.0478926	0.013707	-1.25465	C1orf74	148304	ENSG00000162757	1	209779208	209784559	chromosome 1 open reading frame 74	-0.331358	0.686966	0.629557	0.762034	-0.0636368	0.305995
-1.08562	-0.609675	0.767964	0.927335	C1QBP	708	ENSG00000108561	17	5432777	5448830	complement C1q binding protein	0.559402	0.0642134	2.99596e-18	6.7537e-17	0.550873	0.0643108
-0.075351	0.310601	-1.31558	1.08033	C1QL1	10882	ENSG00000131094	17	44959693	44968303	complement C1q like 1	0.532715	2.50447	0.831557		0.00925994	0.32987
-0.032682	0.762508	-1.40202	0.672196	C1QTNF1	114897	ENSG00000173918	17	79022814	79049788	C1q and TNF related 1	-0.0625809	0.184675	0.734707	0.838182	-0.0477347	0.162018
0.220837	1.26392	-0.387769	-1.09699	C1QTNF1-AS1		ENSG00000265096	17	79018131	79027673		-0.923191	0.565315	0.102457	0.200472	-0.301088	0.415897
1.05075	0.555791	-0.41821	-1.18833	C1QTNF12	388581	ENSG00000184163	1	1242446	1246722	C1q and TNF related 12	-1.47473	1.2481	0.23737		-0.101957	0.34324
1.19061	-0.284804	-1.19151	0.285704	C1QTNF2	114898	ENSG00000145861	5	160347754	160370641	C1q and TNF related 2	-0.807407	1.49359	0.588797		-0.0387336	0.327752
0.979584	-0.104175	-1.34501	0.469597	C1QTNF3	114899	ENSG00000082196	5	34017858	34043213	C1q and TNF related 3	-0.380883	0.484315	0.431612	0.591833	-0.128299	0.29437
1.21708	0.290231	-0.367342	-1.13997	C1QTNF6	114904	ENSG00000133466	22	37180166	37199385	C1q and TNF related 6	-0.293028	0.323788	0.365466	0.528731	-0.158009	0.249794
1.0283	0.489723	-1.28369	-0.23434	C1R	715	ENSG00000159403	12	7080214	7092540	complement C1r	-0.513021	0.462807	0.267646	0.421706	-0.192696	0.313142
0.581771	1.10816	-0.897809	-0.792124	C1RL	51279	ENSG00000139178	12	7089587	7109238	complement C1r subcomponent like	-0.445062	0.154209	0.00390058	0.0124201	-0.394993	0.152594
0.824448	-0.134131	0.670722	-1.36104	C1RL-AS1	283314	ENSG00000205885	12	7108052	7122524	C1RL antisense RNA 1	-0.125679	0.209879	0.549295	0.698479	-0.0905619	0.180195
0.943288	0.761705	-1.04809	-0.656903	C1S	716	ENSG00000182326	12	6988259	7071032	complement C1s	-0.562802	0.686443	0.412283	0.574739	-0.11158	0.319961
0.733778	0.965354	-0.642035	-1.0571	C2	717	ENSG00000166278	6	31897785	31945673	complement C2	-1.99205	0.641023	0.00188606	0.00652581	-1.49368	0.743699
1.12433	0.297232	-0.14638	-1.27519	C20orf144	128864	ENSG00000149609	20	33662327	33665619	chromosome 20 open reading frame 144	-0.413962	2.34659	0.859972		-0.0081322	0.329423
1.02701	0.42119	-1.32377	-0.124438	C20orf204	284739	ENSG00000196421	20	64034344	64039962	chromosome 20 open reading frame 204	-0.276287	0.912955	0.762172	0.856502	-0.0322538	0.314392
-1.03551	-0.67797	0.851616	0.861869	C20orf27	54976	ENSG00000101220	20	3753508	3767781	adipose secreted signaling protein	0.898547	0.127892	2.12765e-12	2.88194e-11	0.869558	0.129205
0.391619	-0.845536	1.2341	-0.780186	C20orf96	140680	ENSG00000196476	20	270863	290778	chromosome 20 open reading frame 96	0.128616	0.293199	0.660906	0.785453	0.0735018	0.223336
-1.41347	0.112415	0.383045	0.91801	C21orf58	54058	ENSG00000160298	21	46300181	46323875	chromosome 21 open reading frame 58	0.389141	0.306209	0.203788	0.343996	0.231214	0.257638
1.28957	0.290921	-0.831408	-0.749086	C21orf62-AS1		ENSG00000205930	21	32772100	32955437		-1.16947	1.13334	0.302129		-0.0965012	0.338159
-0.722855	-0.884591	1.25263	0.354813	C21orf91	54149	ENSG00000154642	21	17788974	17819386	chromosome 21 open reading frame 91	0.260799	0.120654	0.0306532	0.0742048	0.236584	0.117068
1.12433	0.297232	-0.14638	-1.27519	C22orf23	84645	ENSG00000128346	22	37943050	37953669	chromosome 22 open reading frame 23	-0.413962	2.34659	0.859972		-0.0081322	0.329423
-1.00057	-0.434225	1.34229	0.0925085	C22orf39	128977	ENSG00000242259	22	19351368	19447711	chromosome 22 open reading frame 39	0.337338	0.156229	0.0308306	0.0745264	0.291076	0.151101
0.70011	0.913598	-1.2388	-0.374906	C22orf46	79640	ENSG00000184208	22	41688877	41698136	CTA-216E10.6	-0.312779	0.170282	0.0662353	0.14072	-0.260291	0.161816
-0.137569	-1.31684	1.03491	0.419497	C2CD2	25966	ENSG00000157617	21	41885112	41954018	C2 calcium dependent domain containing 2	0.104169	0.0861048	0.226358	0.371546	0.0979814	0.0836543
0.86847	0.859445	-0.948424	-0.779491	C2CD2L	9854	ENSG00000172375	11	119102198	119118544	C2CD2 like	-0.726348	0.118475	8.74306e-10	8.67456e-09	-0.698578	0.119321
-0.78825	-0.93754	0.935364	0.790426	C2CD3	26005	ENSG00000168014	11	74012718	74171210	C2 domain containing 3 centriole elongation regulator	0.30708	0.106443	0.00391499	0.0124609	0.285811	0.104644
-1.03742	-0.637957	0.599632	1.07574	C2CD4A	145741	ENSG00000198535	15	62066977	62070917	C2 calcium dependent domain containing 4A	1.74787	0.454006	0.000118181	0.000530671	1.49785	0.488384
-0.929856	1.37583	0.044413	-0.490389	C2CD4B	388125	ENSG00000205502	15	62163535	62165285	C2 calcium dependent domain containing 4B	-0.300807	1.72193	0.861322		-0.0105516	0.326853
-0.820191	-0.910619	0.855169	0.87564	C2CD4C	126567	ENSG00000183186	19	405445	409147	C2 calcium dependent domain containing 4C	2.56339	1.37267	0.0618391		0.164025	0.382521
-1.1477	0.471358	1.12299	-0.446656	C2CD4D	100191040	ENSG00000225556	1	151837818	151840557	C2 calcium dependent domain containing 4D	0.358841	0.684071	0.599885	0.739565	0.0695462	0.307474
-0.643552	-1.02707	0.57505	1.09557	C2CD4D-AS1		ENSG00000234614	1	151841877	151850385		0.814897	0.544112	0.13422	0.249314	0.272268	0.385095
-0.844644	1.29117	0.286519	-0.733048	C2CD5	9847	ENSG00000111731	12	22448583	22544546	C2 calcium dependent domain containing 5	-0.0103387	0.0706829	0.883709	0.937387	-0.00979621	0.0691544
-0.670451	-0.989514	1.14112	0.518843	C2orf15	150590	ENSG00000273045	2	99141707	99151669	chromosome 2 open reading frame 15	0.209313	0.158327	0.186158	0.320702	0.174359	0.147559
-1.02225	-0.684942	0.973192	0.734	C2orf27A	29798	ENSG00000287151	2	131647990	131767404	chromosome 2 open reading frame 27A	0.197584	0.140578	0.159871	0.28503	0.170775	0.132796
0.319388	1.2747	-0.761187	-0.832901	C2orf42	54980	ENSG00000115998	2	70149885	70248615	chromosome 2 open reading frame 42	-0.169309	0.157774	0.283223	0.439945	-0.140067	0.145718
-0.621118	1.40221	0.0235664	-0.804656	C2orf49	79074	ENSG00000135974	2	105337532	105349211	chromosome 2 open reading frame 49	-0.0199309	0.0955076	0.834695	0.906138	-0.0183013	0.0918343
0.619625	0.911446	-1.31927	-0.211801	C2orf49-DT		ENSG00000272994	2	105334027	105337475		-0.470891	0.302286	0.119288	0.226694	-0.295356	0.269408
0.862703	0.64998	-0.169329	-1.34335	C2orf50	130813	ENSG00000150873	2	11133128	11151317	chromosome 2 open reading frame 50	-0.745628	0.763268	0.328625	0.490665	-0.125449	0.33289
0.485987	0.342338	0.659048	-1.48737	C2orf66	401027	ENSG00000187944	2	196804417	196809355	chromosome 2 open reading frame 66	-0.717735	1.88415	0.703252		-0.0213239	0.328593
-1.41196	0.104119	0.389058	0.918783	C2orf68	388969	ENSG00000168887	2	85605254	85612066	chromosome 2 open reading frame 68	0.127355	0.122503	0.298522	0.457414	0.113465	0.116122
-0.760016	-0.819323	1.29163	0.287707	C2orf69	205327	ENSG00000178074	2	199911293	199955935	chromosome 2 open reading frame 69	0.278895	0.0886539	0.00165586	0.00581061	0.264715	0.0874556
-0.570317	-1.1109	0.723586	0.957632	C2orf72	257407	ENSG00000204128	2	231037523	231049719	chromosome 2 open reading frame 72	0.0639289	0.0755359	0.397364	0.560766	0.0609055	0.0737415
-0.760832	-0.951797	1.01231	0.700322	C2orf76	130355	ENSG00000186132	2	119302225	119366834	chromosome 2 open reading frame 76	0.244423	0.163905	0.135896	0.251767	0.203115	0.153477
0.28255	-0.539421	1.26778	-1.01091	C2orf81	388963	ENSG00000284308	2	74414176	74421619	chromosome 2 open reading frame 81	0.0323544	0.576434	0.955239	0.976555	0.00846755	0.288172
-0.837987	-0.891678	0.923209	0.806456	C2orf88	84281	ENSG00000187699	2	189879609	190203484	chromosome 2 open reading frame 88	0.568444	0.15565	0.000260144	0.00109226	0.517318	0.156357
0.468584	-0.729178	-0.922027	1.18262	C2orf92	728537	ENSG00000228486	2	97664217	97703066	chromosome 2 open reading frame 92	0.0492559	0.567291	0.930809	0.964364	0.013041	0.287008
0.872763	0.859016	-0.886465	-0.845314	C3	718	ENSG00000125730	19	6677704	6730562	complement C3	-3.73875	0.259515	4.69891e-47	4.84735e-45	-3.70276	0.259605
-1.39415	0.941424	0.0425412	0.410186	C3orf18	51161	ENSG00000088543	3	50558025	50571027	chromosome 3 open reading frame 18	0.166648	0.441129	0.705597	0.81785	0.0610117	0.270205
-0.999869	1.32175	0.156407	-0.478292	C3orf20	84077	ENSG00000131379	3	14675141	14773036	chromosome 3 open reading frame 20	-0.185096	1.44535	0.898099		-0.00901507	0.324366
-0.3984	-1.14586	1.18195	0.362312	C3orf33	285315	ENSG00000174928	3	155762617	155806278	chromosome 3 open reading frame 33	0.281966	0.341246	0.408643	0.571199	0.144123	0.25451
-0.916055	-0.419157	1.40712	-0.071905	C3orf38	285237	ENSG00000179021	3	88149959	88168729	chromosome 3 open reading frame 38	0.19036	0.122938	0.121522	0.230285	0.169944	0.117665
0.921407	0.786256	-0.660499	-1.04716	C3orf52	79669	ENSG00000114529	3	112086335	112131004	chromosome 3 open reading frame 52	-0.364908	0.139095	0.00870455	0.0250676	-0.32616	0.136294
0.974324	-0.11245	0.481925	-1.3438	C3orf62	375341	ENSG00000188315	3	49268596	49277232	chromosome 3 open reading frame 62	-0.134661	0.23624	0.568665	0.714363	-0.0903233	0.196023
-1.14489	-0.484956	0.564081	1.06577	C3orf70	285382	ENSG00000187068	3	185076838	185153060	chromosome 3 open reading frame 70	0.823715	0.215355	0.000130815	0.000583868	0.734257	0.22137
-1.07584	-0.533212	1.16766	0.441391	C3orf80	401097	ENSG00000180044	3	160225422	160228213	chromosome 3 open reading frame 80	0.889149	0.523389	0.0893516	0.17987	0.336537	0.424598
0.191096	1.10585	0.0221732	-1.31912	C3orf85	401081	ENSG00000241224	3	109118252	109151401	chromosome 3 open reading frame 85	-2.27162	2.36009	0.335792		-0.0437782	0.333695
0.23272	0.949596	-1.41127	0.228956	C3P1	388503	ENSG00000167798	19	10037803	10074145	complement component 3 precursor pseudogene	-1.52612	1.5189	0.315015		-0.0711793	0.335996
-0.460405	1.20313	-1.10098	0.358257	C4A		ENSG00000244731	6	31982052	32002681		-0.83402	1.24563	0.50314		-0.0555531	0.327886
0.464103	1.01663	-1.31255	-0.16818	C4B	721	ENSG00000224389	6	32014795	32035418	complement C4B (Chido blood group)	-2.59742	1.67931	0.121931		-0.107209	0.351551
0.961821	0.756677	-0.97266	-0.745837	C4BPA	722	ENSG00000123838	1	207104233	207144972	complement component 4 binding protein alpha	-2.85272	1.26719	0.0243719		-0.246811	0.462515
-1.00472	1.09216	-0.673761	0.586314	C4BPAP2	724	ENSG00000232621	1	207225798	207229202	C4BPA pseudogene 2	-0.160682	1.69777	0.924598		-0.0057011	0.32652
0.891677	0.839233	-0.829555	-0.901354	C4BPB	725	ENSG00000123843	1	207088860	207099993	complement component 4 binding protein beta	-2	0.143224	2.57902e-44	2.39127e-42	-1.98022	0.143819
1.05962	0.640624	-0.953564	-0.746677	C4orf19	55286	ENSG00000154274	4	37453925	37623495	chromosome 4 open reading frame 19	-0.443928	0.105403	2.53413e-05	0.000129466	-0.420331	0.105015
1.082	-0.0396115	-1.32257	0.280187	C4orf3	401152	ENSG00000164096	4	119296419	119304445	chromosome 4 open reading frame 3	-0.124402	0.0886211	0.160394	0.285702	-0.116505	0.0860553
0.685094	1.02175	-0.73089	-0.975951	C4orf33	132321	ENSG00000151470	4	129093317	129116640	chromosome 4 open reading frame 33	-0.48927	0.159419	0.00214714	0.00733142	-0.435135	0.158703
0.126818	0.530286	-1.44364	0.786532	C4orf36	132989	ENSG00000163633	4	86876205	86892422	chromosome 4 open reading frame 36	-0.247733	1.78096	0.88937		-0.00825873	0.327043
-0.988678	-0.731711	0.92038	0.80001	C4orf46	201725	ENSG00000205208	4	158666675	158672255	chromosome 4 open reading frame 46	0.369503	0.0930697	7.18197e-05	0.000337273	0.35192	0.0924419
-0.806567	1.44194	-0.132744	-0.502629	C4orf47	441054	ENSG00000205129	4	185426249	185449826	chromosome 4 open reading frame 47	-0.60217	2.27847	0.791559		-0.0123334	0.329483
-0.227205	-0.0496978	1.34418	-1.06728	C4orf48	401115	ENSG00000243449	4	2041995	2043964	chromosome 4 open reading frame 48	0.0764098	0.46432	0.869288	0.928413	0.0268822	0.271381
1.02798	0.667304	-0.673023	-1.02226	C5	727	ENSG00000106804	9	120932642	121075195	complement C5	-0.480126	0.0855427	1.99183e-08	1.6425e-07	-0.464338	0.0855134
1.22143	0.413706	-0.809283	-0.825849	C5AR1	728	ENSG00000197405	19	47290023	47322066	complement C5a receptor 1	-1.56339	0.665677	0.0188454	0.0490812	-0.699404	0.906959
1.31026	-0.00476247	-1.11698	-0.188521	C5orf15	56951	ENSG00000113583	5	133955510	133968674	chromosome 5 open reading frame 15	-0.0866467	0.087014	0.319357	0.480548	-0.0811668	0.0843764
-0.712503	-0.844424	1.31104	0.245887	C5orf22	55322	ENSG00000082213	5	31532287	31555053	chromosome 5 open reading frame 22	0.21701	0.0765249	0.00457101	0.0143286	0.207996	0.0754206
-1.25098	-0.361715	0.850062	0.762632	C5orf24	134553	ENSG00000181904	5	134845680	134859735	chromosome 5 open reading frame 24	0.117478	0.0666215	0.0778396	0.160959	0.11324	0.0655374
-1.30444	-0.158406	1.05031	0.412542	C5orf34	375444	ENSG00000172244	5	43486709	43515148	chromosome 5 open reading frame 34	0.280967	0.191561	0.142451	0.260563	0.22106	0.177034
0.388107	-0.187622	1.08172	-1.28221	C5orf34-AS1		ENSG00000248554	5	43511058	43521811		-0.0683201	1.59625	0.965861		-0.00267848	0.325598
-0.662599	-1.04646	0.802387	0.906673	C5orf51	285636	ENSG00000205765	5	41904188	41921636	RAB7A interacting MON1-CCZ1 complex subunit 1	0.369826	0.0794899	3.27953e-06	1.94685e-05	0.356969	0.0790744
1.28543	0.299581	-0.822548	-0.762459	C5orf52	100190949	ENSG00000187658	5	157671533	157680158	chromosome 5 open reading frame 52	-1.5104	1.06742	0.157066		-0.1462	0.361445
1.32183	-0.111492	-0.101255	-1.10909	C5orf63	401207	ENSG00000164241	5	127045235	127073506	chromosome 5 open reading frame 63	-0.170196	0.294856	0.563792	0.710418	-0.0967354	0.226526
1.07181	0.455386	-0.274885	-1.25231	C6	729	ENSG00000039537	5	41142116	41261438	complement C6	-1.16992	0.945276	0.215846	0.358792	-0.138259	0.351368
-1.39567	0.146727	0.270474	0.978473	C6orf120	387263	ENSG00000185127	6	169702190	169704856	chromosome 6 open reading frame 120	0.0554874	0.105442	0.598725	0.738783	0.0505653	0.100688
0.928024	0.799325	-0.926852	-0.800498	C6orf132	647024	ENSG00000188112	6	42092233	42142620	chromosome 6 open reading frame 132	-1.14436	0.0831487	4.26438e-43	3.79579e-41	-1.13383	0.0833781
-0.49329	-0.765928	-0.200212	1.45943	C6orf136	221545	ENSG00000204564	6	30647039	30653210	chromosome 6 open reading frame 136	0.19907	0.149949	0.184314	0.318264	0.168914	0.140425
-0.559586	-1.10702	1.0238	0.642812	C6orf141	135398	ENSG00000197261	6	49550666	49561907	chromosome 6 open reading frame 141	0.345441	0.160658	0.0315424	0.0759877	0.296317	0.155091
-0.070166	-0.967882	-0.352615	1.39066	C6orf15	29113	ENSG00000204542	6	31111223	31112575	chromosome 6 open reading frame 15	0.34317	0.55195	0.534112	0.685439	0.0948529	0.297446
-0.126794	1.27526	-1.16506	0.0165978	C6orf163	206412	ENSG00000203872	6	87344813	87365463	chromosome 6 open reading frame 163	-0.604266	0.693372	0.383488	0.547232	-0.118043	0.323359
-0.0673877	1.27893	-1.16518	-0.0463546	C6orf223	221416	ENSG00000181577	6	44000580	44007612	long intergenic non-protein coding RNA 3040	-0.112781	0.11749	0.337096	0.499212	-0.100627	0.111599
1.21237	0.190313	-1.20641	-0.196276	C6orf226	441150	ENSG00000221821	6	42890265	42890821	chromosome 6 open reading frame 226	-0.607477	0.4885	0.213663	0.356226	-0.219538	0.333797
0.385737	1.15459	-1.17748	-0.362848	C6orf47	57827	ENSG00000204439	6	31658298	31660778	chromosome 6 open reading frame 47	-0.100274	0.116683	0.390135	0.553877	-0.0893798	0.110733
-1.00287	-0.549926	0.283335	1.26947	C6orf52	347744	ENSG00000137434	6	10671418	10694797	chromosome 6 open reading frame 52	0.245999	0.321573	0.444281	0.603707	0.132184	0.243831
0.382962	1.23952	-0.829962	-0.792521	C6orf62	81688	ENSG00000112308	6	24704861	24719998	chromosome 6 open reading frame 62	-0.206588	0.0702396	0.00326949	0.0106257	-0.198999	0.0693513
1.15494	0.466497	-0.551911	-1.06953	C6orf89	221477	ENSG00000198663	6	36871870	36928964	chromosome 6 open reading frame 89	-0.0700054	0.0686238	0.307666	0.468293	-0.0671023	0.0672843
-0.770744	-0.891072	1.17085	0.490962	C7	730	ENSG00000112936	5	40909492	40984643	complement C7	2.05379	1.51057	0.173953		0.1001	0.346647
0.181593	-0.762437	-0.762437	1.34328	C7orf25	79020	ENSG00000136197	7	42909273	42912305	chromosome 7 open reading frame 25	2.03683	2.82473	0.470866		0.0282977	0.332395
-1.12669	-0.514365	0.576103	1.06495	C7orf26	79034	ENSG00000146576	7	6590021	6608726	integrator complex subunit 15	0.311129	0.125857	0.0134331	0.0367553	0.28158	0.122879
0.094034	1.22492	-0.102283	-1.21667	C7orf31	136895	ENSG00000153790	7	25134692	25180356	chromosome 7 open reading frame 31	-0.186637	0.513678	0.716355	0.825345	-0.0551958	0.283307
-1.14204	-0.533438	0.776138	0.899337	C7orf50	84310	ENSG00000146540	7	996986	1138260	chromosome 7 open reading frame 50	0.63605	0.137155	3.52711e-06	2.08666e-05	0.597263	0.138361
0.0776585	1.20423	-1.24185	-0.0400417	C7orf57	136288	ENSG00000164746	7	48035511	48061304	chromosome 7 open reading frame 57	-2.29248	1.80434	0.203895		-0.0784193	0.340767
0.85429	-0.167471	-1.34498	0.65816	C7orf61	402573	ENSG00000185955	7	100456620	100464260	sperm acrosome developmental regulator	-0.626897	1.85584	0.735517		-0.019817	0.328136
-1.43468	0.801779	0.0944576	0.538444	C8G	733	ENSG00000176919	9	136945185	136946975	complement C8 gamma chain	0.512733	1.30385	0.694138		0.0309859	0.324507
-1.14645	-0.524825	0.753049	0.918224	C8orf33	65265	ENSG00000182307	8	145052465	145066685	chromosome 8 open reading frame 33	0.469827	0.0732334	1.40389e-10	1.52712e-09	0.458478	0.0732429
-0.518955	0.989507	0.670497	-1.14105	C8orf44	56260	ENSG00000288596	8	66667615	66685564	chromosome 8 putative open reading frame 44	-0.0949185	0.525476	0.856655	0.920856	-0.0267301	0.282166
0.388532	0.942192	0.0680901	-1.39881	C8orf58	541565	ENSG00000241852	8	22599599	22604150	chromosome 8 open reading frame 58	-0.318813	0.274462	0.2454	0.395142	-0.201901	0.232479
-1.00496	0.0588439	-0.404164	1.35028	C8orf76	84933	ENSG00000189376	8	123219967	123241377	chromosome 8 open reading frame 76	0.131846	0.215308	0.5403	0.69116	0.0942276	0.183852
-1.14086	-0.463263	0.48803	1.11609	C8orf82	414919	ENSG00000213563	8	144525733	144529132	chromosome 8 open reading frame 82	0.411279	0.165011	0.0126871	0.035003	0.355858	0.161696
-0.301628	1.30252	-1.09693	0.096039	C8orf88	100127983	ENSG00000253250	8	90958471	90985238	chromosome 8 open reading frame 88	-0.723828	1.02075	0.478254		-0.0702733	0.326075
0.597731	-0.677954	-1.00389	1.08411	C9orf116	138162	ENSG00000160345	9	135495181	135501734	piercer of microtubule wall 1	0.0366397	0.638659	0.954251	0.976412	0.00824658	0.294853
1.2507	0.221247	-1.12551	-0.34644	C9orf152	401546	ENSG00000188959	9	110190048	110208159	chromosome 9 open reading frame 152	-0.144798	0.0801037	0.0706646	0.148558	-0.137691	0.0783226
0.976302	0.430423	-1.36372	-0.0430093	C9orf163	158055	ENSG00000196366	9	136483495	136486067	chromosome 9 putative open reading frame 163	-0.602309	1.11919	0.590463		-0.0493336	0.323641
-0.327324	1.37342	-1.00233	-0.04377	C9orf24	84688	ENSG00000164972	9	34379019	34397828	chromosome 9 open reading frame 24	-1.05582	1.55972	0.498454		-0.0458851	0.329894
-0.953623	-0.764794	0.980072	0.738344	C9orf40	55071	ENSG00000135045	9	74946583	74952912	chromosome 9 open reading frame 40	0.909495	0.171633	1.164e-07	8.60949e-07	0.856816	0.174638
-0.946007	-0.782072	0.876339	0.851741	C9orf43	257169	ENSG00000157653	9	113410054	113429690	chromosome 9 open reading frame 43	0.623414	0.570342	0.27437	0.429111	0.174165	0.331618
0.438929	0.993797	-1.34619	-0.0865386	C9orf57	138240	ENSG00000204669	9	72051376	72072721	chromosome 9 open reading frame 57	-2.34453	1.28183	0.0673912		-0.168329	0.38425
0.0401943	1.34175	-1.03968	-0.342264	C9orf64	84267	ENSG00000165118	9	83938311	83956986	Q-nucleotide N-glycosylase 1	-0.0532706	0.0970463	0.583061	0.726634	-0.0489989	0.0932898
0.217381	1.32028	-0.651763	-0.885898	C9orf72	203228	ENSG00000147894	9	27535640	27573866	C9orf72-SMCR8 complex subunit	-0.434084	0.151903	0.00426801	0.0134662	-0.385759	0.150242
-0.942902	-0.611835	0.263562	1.29117	C9orf78	51759	ENSG00000136819	9	129827290	129835863	chromosome 9 open reading frame 78	0.259812	0.0914624	0.00450221	0.0141365	0.245321	0.0899409
1.31341	0.229645	-0.645618	-0.897437	C9orf85	138241	ENSG00000155621	9	71911510	71986054	chromosome 9 open reading frame 85	-0.0915589	0.14701	0.53341	0.684877	-0.0767776	0.135275
-0.224931	-0.45883	-0.777296	1.46106	CA11	770	ENSG00000063180	19	48637946	48646187	carbonic anhydrase 11	0.113357	0.379801	0.765348	0.858736	0.0499383	0.252494
-0.462953	-1.18018	0.968017	0.675119	CA12	771	ENSG00000074410	15	63321378	63381846	carbonic anhydrase 12	0.283599	0.0716664	7.58315e-05	0.000353979	0.274234	0.0710387
0.973479	0.751285	-0.878263	-0.8465	CA13	377677	ENSG00000185015	8	85220587	85284073	carbonic anhydrase 13	-1.29699	0.128653	6.6833e-24	2.1871e-22	-1.274	0.129437
0.309523	1.19328	-1.17036	-0.332443	CA14	23632	ENSG00000118298	1	150257251	150265078	carbonic anhydrase 14	-0.610784	0.83672	0.465406	0.623486	-0.0853083	0.322454
-0.948061	-0.391557	1.39458	-0.054959	CA2	760	ENSG00000104267	8	85463968	85481493	carbonic anhydrase 2	0.170482	0.186237	0.35998	0.522928	0.132134	0.166793
0.800189	0.922086	-0.975894	-0.746381	CA3	761	ENSG00000164879	8	85373436	85449040	carbonic anhydrase 3	-2.25966	0.738225	0.00220644	0.00751414	-1.66471	0.8656
-0.00475029	0.691108	-1.41248	0.726121	CA3-AS1		ENSG00000253549	8	85440596	85464915		-0.309751	0.875753	0.723566	0.830092	-0.0390443	0.313695
1.33828	0.0924745	-1.01279	-0.417967	CA4	762	ENSG00000167434	17	60149942	60170899	carbonic anhydrase 4	-4.16846	1.3711	0.00236405	0.00797766	-3.12022	1.47783
0.990286	-0.0789158	-1.3495	0.438129	CA5B	11238	ENSG00000169239	X	15688830	15788411	carbonic anhydrase 5B	-0.0932782	0.200473	0.641722	0.771661	-0.0685973	0.172998
-1.4748	0.261241	0.505893	0.707666	CA5BP1	340591	ENSG00000186312	X	15674932	15703724	carbonic anhydrase 5B pseudogene 1	0.187812	0.220722	0.394825	0.558419	0.133606	0.190369
-0.501455	-1.16484	0.874615	0.791675	CA6	765	ENSG00000131686	1	8945867	8975092	carbonic anhydrase 6	3.91876	1.39499	0.00496715		2.70065	1.60173
-0.658721	-1.05098	0.85529	0.854408	CA8	767	ENSG00000178538	8	60185412	60281400	carbonic anhydrase 8	5.21342	1.5777	0.000951677	0.00352959	4.19228	1.55592
0.922029	0.216746	-1.42217	0.283396	CA9	768	ENSG00000107159	9	35673928	35681159	carbonic anhydrase 9	-0.317709	0.450798	0.480953	0.637981	-0.116214	0.283061
0.613089	-0.384611	-1.22106	0.992579	CAAP1	79886	ENSG00000120159	9	26840685	26892803	caspase activity and apoptosis inhibitor 1	-0.0104831	0.0900638	0.907338	0.951438	-0.00968222	0.0869056
0.927814	0.801701	-0.844438	-0.885077	CAB39	51719	ENSG00000135932	2	230712842	230821075	calcium binding protein 39	-0.286576	0.0553814	2.2842e-07	1.62916e-06	-0.280803	0.0551122
0.757513	0.89819	-1.18052	-0.475181	CAB39L	81617	ENSG00000102547	13	49308650	49444064	calcium binding protein 39 like	-0.188265	0.152208	0.216128	0.359068	-0.158335	0.14192
-0.519998	-1.15279	0.808531	0.86426	CABIN1	23523	ENSG00000099991	22	24011192	24178628	calcineurin binding protein 1	0.305895	0.0733884	3.07062e-05	0.000154045	0.295284	0.0728047
-1.01471	-0.699342	0.93541	0.778644	CABLES1	91768	ENSG00000134508	18	23134564	23260470	Cdk5 and Abl enzyme substrate 1	0.334118	0.0803598	3.21366e-05	0.000160549	0.321441	0.0798077
-0.222806	-1.11068	0.0234432	1.31004	CABLES2	81928	ENSG00000149679	20	62388634	62407285	Cdk5 and Abl enzyme substrate 2	0.177593	0.130434	0.173337	0.303276	0.156165	0.123651
0.208795	-1.44162	0.373302	0.859524	CABP1	9478	ENSG00000157782	12	120640626	120667324	calcium binding protein 1	0.455623	0.366169	0.213391	0.355849	0.231833	0.289484
-0.942947	-0.485364	0.060231	1.36808	CABP1-DT		ENSG00000256008	12	120628830	120641591		0.65726	0.539428	0.223057	0.367544	0.205028	0.341159
0.961365	0.337443	0.0984119	-1.39722	CABP4	57010	ENSG00000175544	11	67452406	67461752	calcium binding protein 4	-0.532123	0.377482	0.158638	0.283221	-0.269639	0.30939
-1.45411	0.448408	0.203869	0.801832	CABYR	26256	ENSG00000154040	18	24138987	24161600	calcium binding tyrosine phosphorylation regulated	0.0585344	0.33962	0.86316	0.924414	0.0289123	0.238351
0.797635	0.931034	-0.826863	-0.901805	CACFD1	11094	ENSG00000160325	9	133459965	133470848	calcium channel flower domain containing 1	-0.351949	0.148497	0.0177843	0.0468265	-0.308792	0.144547
-0.865585	-0.855027	1.00073	0.719885	CACHD1	57685	ENSG00000158966	1	64470129	64693058	cache domain containing 1	0.62734	0.137446	5.0122e-06	2.89205e-05	0.588329	0.138471
0.599076	0.553559	0.337575	-1.49021	CACNA1A	773	ENSG00000141837	19	13206442	13633025	calcium voltage-gated channel subunit alpha1 A	-0.685336	1.31604	0.602535		-0.0409981	0.326011
-0.128342	1.30983	-0.0569202	-1.12456	CACNA1C		ENSG00000151067	12	1970772	2697950		-1.16221	1.69037	0.491737		-0.0429199	0.330446
-0.507366	-1.13426	1.0538	0.587825	CACNA1D	776	ENSG00000157388	3	53328963	53813733	calcium voltage-gated channel subunit alpha1 D	0.401142	0.151346	0.00803722	0.0233749	0.354428	0.14857
0.249847	-1.1794	-0.281735	1.21129	CACNA1E	777	ENSG00000198216	1	181317690	181808084	calcium voltage-gated channel subunit alpha1 E	1.55836	1.70243	0.359995		0.0591389	0.334231
1.21298	0.169378	-1.21297	-0.16938	CACNA1F	778	ENSG00000102001	X	49205063	49233371	calcium voltage-gated channel subunit alpha1 F	-1.81327	1.07584	0.091902	0.183943	-0.18095	0.386993
0.377788	0.244577	-1.45219	0.829824	CACNA1G	8913	ENSG00000006283	17	50560715	50627474	calcium voltage-gated channel subunit alpha1 G	-0.21731	1.76905	0.902234		-0.00736935	0.326884
-0.923691	0.18689	-0.590877	1.32768	CACNA1H	8912	ENSG00000196557	16	1153106	1221771	calcium voltage-gated channel subunit alpha1 H	1.13547	1.76512	0.520038		0.0387147	0.330239
0.912028	0.673921	-1.27069	-0.315263	CACNA1I	8911	ENSG00000100346	22	39570753	39689735	calcium voltage-gated channel subunit alpha1 I	-3.12729	1.52593	0.0404199		-0.1765	0.394891
1.08479	0.615129	-0.849958	-0.849958	CACNA2D1	781	ENSG00000153956	7	81946444	82443777	calcium voltage-gated channel auxiliary subunit alpha2delta 1	-5.5326	1.86998	0.00309003		-0.206135	0.429691
-1.02041	1.26439	0.284406	-0.52838	CACNA2D2	9254	ENSG00000007402	3	50362613	50504244	calcium voltage-gated channel auxiliary subunit alpha2delta 2	-0.307023	0.989297	0.756299	0.852142	-0.0304241	0.317338
0.895542	0.835975	-0.859586	-0.871931	CACNA2D4	93589	ENSG00000151062	12	1791963	1918666	calcium voltage-gated channel auxiliary subunit alpha2delta 4	-1.52034	0.167699	1.23648e-19	3.04276e-18	-1.48562	0.169185
1.15378	0.478722	-1.04765	-0.584852	CACNB1	782	ENSG00000067191	17	39173453	39197703	calcium voltage-gated channel auxiliary subunit beta 1	-0.429679	0.208479	0.0393013	0.0914272	-0.341669	0.20042
0.811383	0.806951	-1.24562	-0.372711	CACNB3	784	ENSG00000167535	12	48813794	48828941	calcium voltage-gated channel auxiliary subunit beta 3	-0.205997	0.127997	0.107531	0.208646	-0.182813	0.122289
0.471141	0.993208	-0.132423	-1.33193	CACNB4	785	ENSG00000182389	2	151832771	152099167	calcium voltage-gated channel auxiliary subunit beta 4	-1.09769	0.913928	0.229724	0.375784	-0.136612	0.348936
-0.0697579	1.43301	-0.602912	-0.760339	CACNG6	59285	ENSG00000130433	19	53991637	54012666	calcium voltage-gated channel auxiliary subunit gamma 6	-2.11392	1.26899	0.0957478		-0.148583	0.369526
0.807879	0.787319	-0.320559	-1.27464	CACNG8	59283	ENSG00000142408	19	53962937	53990215	calcium voltage-gated channel auxiliary subunit gamma 8	-0.567899	0.357146	0.111811	0.215368	-0.315857	0.313264
-0.879437	-0.827407	0.646866	1.05998	CACTIN	58509	ENSG00000105298	19	3610645	3626815	cactin, spliceosome C complex subunit	0.542308	0.138456	8.97224e-05	0.00041276	0.501829	0.138788
-0.578889	-1.03694	1.18486	0.430967	CACUL1	143384	ENSG00000151893	10	118674167	118755249	CDK2 associated cullin domain 1	0.246219	0.0680914	0.000299188	0.00123981	0.238319	0.0674218
-1.01787	-0.68846	0.722442	0.983889	CACYBP	27101	ENSG00000116161	1	174999163	175012027	calcyclin binding protein	0.614048	0.0737767	8.57173e-17	1.71968e-15	0.602884	0.0739678
-1.28399	-0.198575	1.06758	0.414988	CACYBPP2		ENSG00000177855	2	183607442	183608119		0.916392	0.764568	0.230694	0.376791	0.158381	0.350461
-0.814481	-0.912285	0.945539	0.781226	CAD	790	ENSG00000084774	2	27217369	27243943	carbamoyl-phosphate synthetase 2, aspartate transcarbamylase, and dihydroorotase	0.729312	0.0622402	1.03429e-31	5.59414e-30	0.72183	0.062366
-1.18168	-0.460907	0.966494	0.676089	CADM1	23705	ENSG00000182985	11	115169218	115504957	cell adhesion molecule 1	0.342651	0.148207	0.0207791	0.0532887	0.300449	0.144109
-0.352478	1.18665	-1.16532	0.331151	CADM4	199731	ENSG00000105767	19	43622368	43639850	cell adhesion molecule 4	-0.0805269	0.159457	0.613554	0.750596	-0.0655178	0.144586
-0.845895	-0.874673	1.00034	0.720229	CADPS	8618	ENSG00000163618	3	62398346	62875416	calcium dependent secretion activator	0.506292	0.0957194	1.22763e-07	9.05005e-07	0.48691	0.0957895
0.710378	0.998504	-0.99267	-0.716211	CADPS2	93664	ENSG00000081803	7	122318411	122886759	calcium dependent secretion activator 2	-0.219264	0.085687	0.0105004	0.0295944	-0.207642	0.0841304
0.166654	-1.45898	0.580706	0.711616	CAGE1	285782	ENSG00000164304	6	7326656	7389742	cancer antigen 1	0.711113	1.57157	0.65092		0.0310635	0.327405
0.244889	0.776447	-1.46345	0.442116	CAHM	100526820	ENSG00000270419	6	163413065	163413960	colon adenocarcinoma hypermethylated	-1.03972	2.27699	0.647944		-0.0218088	0.330171
0.949603	0.637025	-1.25902	-0.327611	CALB1	793	ENSG00000104327	8	90058608	90095475	calbindin 1	-3.1536	2.07152	0.127919		-0.0887856	0.345789
-0.89692	-0.816933	1.02942	0.684431	CALB2	794	ENSG00000172137	16	71358713	71390436	calbindin 2	1.5773	0.197243	1.27744e-15	2.34377e-14	1.53114	0.199825
0.916198	0.813611	-0.900247	-0.829562	CALCOCO1	57658	ENSG00000012822	12	53708517	53727745	calcium binding and coiled-coil domain 1	-1.73259	0.113037	4.99932e-53	6.38314e-51	-1.71887	0.113345
0.910143	0.820218	-0.895244	-0.835117	CALCOCO2	10241	ENSG00000136436	17	48831018	48866522	calcium binding and coiled-coil domain 2	-0.676282	0.0661658	1.5965e-24	5.40623e-23	-0.667477	0.0663019
1.48099	-0.493312	-0.688215	-0.299461	CALCR	799	ENSG00000004948	7	93424486	93574730	calcitonin receptor	-0.627858	1.48636	0.672724		-0.0301327	0.326419
0.615139	1.06504	-1.03474	-0.64544	CALCRL	10203	ENSG00000064989	2	187341964	187448460	calcitonin receptor like receptor	-2.89559	1.10071	0.00852232	0.0245837	-0.520104	1.46037
1.40699	-0.549161	-0.847766	-0.0100616	CALCRL-AS1		ENSG00000224063	2	187003220	187556288		-0.358102	0.701841	0.609889	0.747638	-0.066416	0.307709
0.861654	0.833526	-1.09856	-0.596625	CALD1	800	ENSG00000122786	7	134744252	134970729	caldesmon 1	-2.12198	0.956443	0.0265127	0.0656265	-0.332367	0.567744
0.820544	0.778907	-0.33021	-1.26924	CALHM2	51063	ENSG00000138172	10	103446786	103452402	calcium homeostasis modulator family member 2	-1.4692	0.492713	0.00286514	0.00942959	-1.09238	0.563349
-1.07833	-0.617121	0.945383	0.750073	CALM1	801	ENSG00000198668	14	90396502	90408268	calmodulin 1	0.241806	0.0519878	3.29987e-06	1.95818e-05	0.237226	0.0516951
0.840142	0.890854	-0.831113	-0.899884	CALM2	805	ENSG00000143933	2	47160084	47176921	calmodulin 2	-0.487564	0.0460158	3.12398e-26	1.19858e-24	-0.483176	0.0460231
-0.743075	1.46478	-0.216265	-0.505445	CALM2P2		ENSG00000229097	10	70163685	70164124		-0.857565	1.58927	0.589474		-0.0354074	0.328374
-0.929856	1.37583	0.044413	-0.490389	CALM2P3		ENSG00000215482	13	41170700	41171148		-0.300807	1.72193	0.861322		-0.0105516	0.326853
-1.05587	-0.447895	0.225638	1.27813	CALM3	808	ENSG00000160014	19	46601074	46610782	calmodulin 3	0.11173	0.0590006	0.0582626	0.126736	0.108586	0.0582245
-0.0745746	1.17453	0.160643	-1.2606	CALML3-AS1		ENSG00000205488	10	5510036	5526246		-1.08313	1.49939	0.470062		-0.0503414	0.330281
0.416498	0.280879	0.770344	-1.46772	CALML4	91860	ENSG00000129007	15	68190705	68206079	calmodulin like 4	-0.318393	0.533884	0.550928	0.699869	-0.090672	0.293827
-0.565113	-0.980016	0.259483	1.28565	CALR	811	ENSG00000179218	19	12938578	12944489	calreticulin	0.224456	0.0599869	0.000182745	0.000792711	0.220598	0.059447
-1.07597	-0.626414	0.830555	0.871826	CALU	813	ENSG00000128595	7	128739292	128773400	calumenin	0.206614	0.0578678	0.000356382	0.00145438	0.202127	0.057368
0.144404	-1.07318	-0.371117	1.29989	CAMK1	8536	ENSG00000134072	3	9757347	9769992	calcium/calmodulin dependent protein kinase I	0.16491	0.230184	0.473729	0.63109	0.113929	0.194161
0.532384	1.13368	-0.6856	-0.980459	CAMK1D	57118	ENSG00000183049	10	12349547	12835545	calcium/calmodulin dependent protein kinase ID	-1.48003	0.706324	0.0361353	0.0852202	-0.424917	0.633318
-0.505148	-0.715918	-0.25167	1.47274	CAMK2B	816	ENSG00000058404	7	44217150	44334577	calcium/calmodulin dependent protein kinase II beta	0.733653	0.689687	0.287443	0.444991	0.150434	0.337615
-0.771851	-0.950018	0.959153	0.762717	CAMK2D	817	ENSG00000145349	4	113418054	113761927	calcium/calmodulin dependent protein kinase II delta	0.534716	0.0644269	1.04483e-16	2.08659e-15	0.525945	0.0644776
0.806617	0.923064	-0.838182	-0.8915	CAMK2G	818	ENSG00000148660	10	73812501	73874591	calcium/calmodulin dependent protein kinase II gamma	-0.554002	0.0791987	2.65094e-12	3.54148e-11	-0.540714	0.0793411
0.936589	0.792179	-0.886018	-0.84275	CAMK2N1	55450	ENSG00000162545	1	20482391	20486210	calcium/calmodulin dependent protein kinase II inhibitor 1	-1.21173	0.0716865	4.25986e-64	7.54043e-62	-1.20468	0.0718237
-1.30689	-0.201338	0.99298	0.515252	CAMK2N2	94032	ENSG00000163888	3	184259213	184261553	calcium/calmodulin dependent protein kinase II inhibitor 2	0.592502	0.508962	0.244369	0.393847	0.197812	0.329677
-0.665509	0.647823	1.04259	-1.0249	CAMK4	814	ENSG00000152495	5	111223653	111494886	calcium/calmodulin dependent protein kinase IV	0.0403434	0.883199	0.963566	0.980831	0.00530063	0.311471
-0.937389	-0.7849	0.96625	0.756039	CAMKK1	84254	ENSG00000004660	17	3860315	3894891	calcium/calmodulin dependent protein kinase kinase 1	1.07325	0.163838	5.7277e-11	6.49821e-10	1.03031	0.166213
-0.752083	-0.971023	0.802646	0.92046	CAMKK2	10645	ENSG00000110931	12	121237675	121298308	calcium/calmodulin dependent protein kinase kinase 2	0.3018	0.0702056	1.71724e-05	8.98539e-05	0.29249	0.0696991
-0.842629	-0.886784	0.800845	0.928568	CAMKMT	79823	ENSG00000143919	2	44361947	44772592	calmodulin-lysine N-methyltransferase	0.427958	0.156764	0.00633448	0.019012	0.377191	0.154482
0.201132	-1.2473	-0.131336	1.17751	CAMKV	79012	ENSG00000164076	3	49857988	49869935	CaM kinase like vesicle associated	0.632236	0.981679	0.519552	0.672543	0.0672255	0.323648
1.19883	0.44979	-0.851999	-0.796618	CAMLG	819	ENSG00000164615	5	134738495	134752157	calcium modulating ligand	-0.0846115	0.094786	0.37204	0.535459	-0.0781969	0.0914133
-1.22422	-0.408975	0.80286	0.830331	CAMSAP1	157922	ENSG00000130559	9	135808487	135907546	calmodulin regulated spectrin associated protein 1	0.181028	0.0843096	0.0317785	0.0764855	0.171406	0.0825635
1.10632	-1.23044	0.418697	-0.294581	CAMSAP1-DT		ENSG00000238058	9	135907812	135916126		-0.00947597	0.853744	0.991144	0.995263	-0.000904772	0.309777
0.940208	-0.857501	0.78849	-0.871197	CAMSAP2	23271	ENSG00000118200	1	200738893	200860704	calmodulin regulated spectrin associated protein family member 2	-0.00873464	0.0813158	0.914459	0.955864	-0.00816958	0.078975
0.0746756	-0.209585	-1.14527	1.28018	CAMSAP3	57662	ENSG00000076826	19	7595863	7618304	calmodulin regulated spectrin associated protein family member 3	0.00911644	0.1043	0.930349	0.964248	0.00840596	0.0994976
-0.755099	-0.969861	0.889427	0.835533	CAMTA1	23261	ENSG00000171735	1	6785454	7769706	calmodulin binding transcription activator 1	0.273011	0.121755	0.0249422	0.0623135	0.247221	0.118264
-0.833404	0.191861	1.33636	-0.694816	CAMTA1-DT		ENSG00000237436	1	6783892	6784843		1.09429	1.77991	0.538688		0.0362199	0.329994
1.22564	0.391025	-0.946366	-0.670298	CAMTA2	23125	ENSG00000108509	17	4967992	4987675	calmodulin binding transcription activator 2	-0.124042	0.097282	0.202281	0.342009	-0.114576	0.0939428
-0.921884	-0.791574	1.02342	0.690038	CAND1	55832	ENSG00000111530	12	67269358	67319953	cullin associated and neddylation dissociated 1	0.221528	0.0517682	1.87541e-05	9.73448e-05	0.217134	0.051439
-0.685169	-1.02719	0.78778	0.924574	CANT1	124583	ENSG00000171302	17	78991716	79009867	calcium activated nucleotidase 1	0.309482	0.0520779	2.80418e-09	2.59849e-08	0.303563	0.051887
-0.914318	-0.816191	0.849053	0.881456	CANX	821	ENSG00000127022	5	179678628	179731641	calnexin	0.143484	0.0460334	0.00182735	0.00634381	0.140782	0.0456992
0.452137	-1.2816	1.05076	-0.221296	CAP1	10487	ENSG00000131236	1	40040233	40072649	cyclase associated actin cytoskeleton regulatory protein 1	0.0160579	0.0517686	0.75642	0.852217	0.0157242	0.0511526
-0.212384	0.570549	-1.31161	0.953442	CAP1P1	401076	ENSG00000240809	3	76434018	76435428	CAP1 pseudogene 1	-0.0745487	0.641098	0.907428	0.951468	-0.0154512	0.295548
-0.736284	-0.889781	0.398222	1.22784	CAP1P2	399748	ENSG00000232004	10	43604843	43606251	CAP1 pseudogene 2	1.70844	1.61716	0.290767		0.0713589	0.33691
0.704082	0.977767	-1.0997	-0.582145	CAP2	10486	ENSG00000112186	6	17393595	17557780	cyclase associated actin cytoskeleton regulatory protein 2	-0.473354	0.150739	0.0016882	0.00591078	-0.425127	0.149847
0.867736	0.861381	-0.935736	-0.793382	CAPG	822	ENSG00000042493	2	85394753	85418432	capping actin protein, gelsolin like	-0.793778	0.0743565	1.32835e-26	5.25169e-25	-0.783343	0.0745743
0.986778	0.729945	-0.958063	-0.75866	CAPN1	823	ENSG00000014216	11	65180566	65212006	calpain 1	-0.294606	0.0536981	4.10351e-08	3.23427e-07	-0.288996	0.0534623
0.702119	0.918778	-1.22831	-0.392584	CAPN10	11132	ENSG00000142330	2	240586734	240617705	calpain 10	-0.247695	0.0945834	0.00882398	0.025374	-0.232475	0.0927549
1.24133	-0.628259	-0.968523	0.355448	CAPN10-DT	101752400	ENSG00000260942	2	240582700	240586699	CAPN10 divergent transcript	-0.222169	0.474123	0.639364	0.769955	-0.0744359	0.278755
0.00162513	0.697349	0.71574	-1.41471	CAPN12	147968	ENSG00000182472	19	38730187	38769904	calpain 12	-0.0409894	0.128443	0.74963	0.8482	-0.0355504	0.119992
-1.17089	-0.487023	0.735421	0.922489	CAPN15	6650	ENSG00000103326	16	527712	554636	calpain 15	0.196316	0.0781189	0.0119695	0.0332453	0.187458	0.0768227
1.16501	0.501909	-0.861121	-0.805798	CAPN2	824	ENSG00000162909	1	223701593	223776018	calpain 2	-0.274045	0.0533036	2.72984e-07	1.9189e-06	-0.269187	0.0530215
1.28751	-0.283941	0.113891	-1.11746	CAPN3	825	ENSG00000092529	15	42359498	42412949	calpain 3	-0.676606	0.725356	0.350928	0.513132	-0.124067	0.328833
1.03966	0.67129	-0.904403	-0.80655	CAPN5	726	ENSG00000149260	11	77066961	77126155	calpain 5	-0.788438	0.0743513	2.84814e-26	1.10362e-24	-0.777971	0.0745501
-0.651044	-0.944251	1.25155	0.343749	CAPN6	827	ENSG00000077274	X	111245099	111270483	calpain 6	0.98401	0.941523	0.295965	0.454614	0.115098	0.339475
-0.816623	-0.912294	0.920446	0.808471	CAPN7	23473	ENSG00000131375	3	15206152	15252916	calpain 7	0.220386	0.0753462	0.00344485	0.0111098	0.211415	0.0742978
1.25771	0.347627	-0.736468	-0.86887	CAPN8	388743	ENSG00000203697	1	223538007	223665723	calpain 8	-0.654457	0.110572	3.2429e-09	2.9704e-08	-0.629434	0.111113
0.709735	-0.539784	-1.13151	0.961559	CAPN9	10753	ENSG00000135773	1	230747384	230802003	calpain 9	-0.0587137	1.14835	0.959223		-0.00433656	0.319272
0.831228	0.845958	-1.14432	-0.532866	CAPNS1	826	ENSG00000126247	19	36139953	36150353	calpain small subunit 1	-0.324074	0.0596351	5.50158e-08	4.24668e-07	-0.317017	0.0593824
-0.859763	-0.870786	0.915972	0.814577	CAPRIN1	4076	ENSG00000135387	11	34051731	34102610	cell cycle associated protein 1	0.414587	0.0500736	1.23637e-16	2.45964e-15	0.411064	0.0500323
0.877962	0.847171	-0.754302	-0.97083	CAPRIN2	65981	ENSG00000110888	12	30709552	30823302	caprin family member 2	-0.621205	0.0762639	3.77843e-16	7.26624e-15	-0.609171	0.0764606
0.800847	0.917307	-1.00254	-0.715612	CAPS	828	ENSG00000105519	19	5912339	5916211	calcyphosine	-1.36745	0.430739	0.00150013	0.00532534	-1.07922	0.473917
1.01987	0.681603	-0.696178	-1.0053	CAPS2	84698	ENSG00000180881	12	75275979	75390928	calcyphosine 2	-0.318107	0.134595	0.0181065	0.0475144	-0.283865	0.130953
-1.06757	-0.62473	0.984135	0.708162	CAPZA1	829	ENSG00000116489	1	112619805	112671616	capping actin protein of muscle Z-line subunit alpha 1	0.074916	0.0555495	0.177454	0.30885	0.0729696	0.0548426
-0.510579	-1.11267	1.11478	0.50847	CAPZA2	830	ENSG00000198898	7	116811070	116922049	capping actin protein of muscle Z-line subunit alpha 2	0.106626	0.0569743	0.0612788	0.132025	0.103793	0.0562605
0.758987	0.856283	-1.24705	-0.368222	CAPZB	832	ENSG00000077549	1	19338775	19485539	capping actin protein of muscle Z-line subunit beta	-0.181876	0.065352	0.00538558	0.016527	-0.175861	0.0645252
-0.0178172	-1.35722	0.361727	1.01331	CARD10	29775	ENSG00000100065	22	37490362	37519542	caspase recruitment domain family member 10	0.0993606	0.0896751	0.267859	0.421927	0.0929528	0.0868681
-0.0424725	1.32317	-1.10258	-0.178115	CARD11	84433	ENSG00000198286	7	2906142	3043867	caspase recruitment domain family member 11	-0.141495	0.0948142	0.135609	0.251295	-0.131482	0.0919264
1.17071	0.489921	-0.903021	-0.757609	CARD14	79092	ENSG00000141527	17	80169992	80209331	caspase recruitment domain family member 14	-1.11472	0.410918	0.00667257	0.0199121	-0.80243	0.454638
1.0559	-0.854201	-0.854201	0.652504	CARD16	114769	ENSG00000204397	11	105041326	105101431	caspase recruitment domain family member 16	-0.710259	2.63051	0.787154		-0.0114522	0.330195
0.441327	-1.23223	1.09334	-0.302437	CARD19	84270	ENSG00000165233	9	93096217	93113283	caspase recruitment domain family member 19	0.0567435	0.14478	0.69511	0.810883	0.0481586	0.133028
1.21842	0.404661	-0.680217	-0.942867	CARD6	84674	ENSG00000132357	5	40841308	40860175	caspase recruitment domain family member 6	-0.50847	0.138331	0.000237163	0.0010029	-0.467405	0.138188
0.503156	0.560891	-1.49798	0.433931	CARD8	22900	ENSG00000105483	19	48180770	48255946	caspase recruitment domain family member 8	-0.0848457	0.165177	0.607486	0.745866	-0.0681624	0.14879
1.15328	0.45084	-0.50197	-1.10215	CARD8-AS1	100505812	ENSG00000268001	19	48255675	48258199	CARD8 antisense RNA 1	-0.406763	0.391984	0.299408	0.458502	-0.184202	0.285493
0.152563	1.0495	0.158174	-1.36024	CARD9	64170	ENSG00000187796	9	136363956	136373681	caspase recruitment domain family member 9	-1.16483	1.01994	0.253431	0.405055	-0.115979	0.343536
1.4808	-0.71904	-0.387271	-0.374487	CARF	79800	ENSG00000138380	2	202912214	202988263	calcium responsive transcription factor	-0.0463034	0.206058	0.822204	0.897259	-0.0332727	0.175449
0.0577903	-1.43199	0.656711	0.71749	CARHSP1	23589	ENSG00000153048	16	8852942	8869012	calcium regulated heat stable protein 1	0.100822	0.0855062	0.238351	0.386226	0.0949156	0.0830729
-1.17218	-0.399831	0.446509	1.1255	CARM1	10498	ENSG00000142453	19	10871553	10923075	coactivator associated arginine methyltransferase 1	0.178147	0.0749295	0.0174289	0.0459684	0.170677	0.0736874
-0.299979	-1.2839	0.852333	0.731542	CARMIL1	55604	ENSG00000079691	6	25279078	25620530	capping protein regulator and myosin 1 linker 1	0.11663	0.0699058	0.0952387	0.189274	0.112105	0.0686201
-0.644186	-0.354306	-0.490955	1.48945	CARMIL2	146206	ENSG00000159753	16	67644988	67657569	capping protein regulator and myosin 1 linker 2	0.160993	0.449764	0.72038	0.827839	0.0578832	0.271292
0.688823	0.987336	-1.10821	-0.56795	CARMIL3	90668	ENSG00000186648	14	24052009	24069729	capping protein regulator and myosin 1 linker 3	-0.734446	0.379672	0.0530617	0.117457	-0.428769	0.36748
-0.912304	-0.818475	0.864743	0.866037	CARNMT1	138199	ENSG00000156017	9	74980790	75028423	carnosine N-methyltransferase 1	0.78265	0.0763913	1.2426e-24	4.25405e-23	0.771755	0.0766585
-1.38185	0.571333	0.871953	-0.0614388	CARNS1	57571	ENSG00000172508	11	67414968	67425607	carnosine synthase 1	0.59856	1.35987	0.659821		0.033498	0.325611
0.82502	0.900662	-0.960715	-0.764968	CARS1	833	ENSG00000110619	11	3000922	3057613	cysteinyl-tRNA synthetase 1	-1.24122	0.086142	4.54299e-47	4.71774e-45	-1.23061	0.0863895
-1.35599	-0.0905887	0.492224	0.954356	CARS2	79587	ENSG00000134905	13	110641412	110713603	cysteinyl-tRNA synthetase 2, mitochondrial	0.116647	0.0998362	0.242654	0.391813	0.107525	0.0962261
0.696117	-1.39688	0.749511	-0.0487473	CASC11	100270680	ENSG00000249375	8	127686343	127738987	cancer susceptibility 11	0.429062	1.71533	0.802484		0.0160013	0.326958
0.574543	0.935999	-1.32665	-0.183897	CASC16	643714	ENSG00000249231	16	52552084	52652132	cancer susceptibility 16	-1.61226	1.16466	0.166261		-0.13083	0.355696
0.908417	0.821536	-0.823226	-0.906727	CASC19	103164619	ENSG00000254166	8	127072694	127227541	prostate cancer associated transcript 2	-0.687381	0.119068	7.78684e-09	6.76118e-08	-0.658744	0.119888
0.771134	0.922374	-0.601201	-1.09231	CASC2	255082	ENSG00000177640	10	118046279	118210158	cancer susceptibility 2	-0.551694	0.332866	0.0974374	0.192808	-0.329527	0.300225
-1.47677	0.641427	0.589186	0.246152	CASC3	22794	ENSG00000108349	17	40140318	40172171	CASC3 exon junction complex subunit	0.022862	0.0715004	0.749161	0.847779	0.0218944	0.0699259
1.14498	0.39159	-0.346889	-1.18968	CASC8	727677	ENSG00000246228	8	127289808	127482139	cancer susceptibility 8	-0.196971	0.259253	0.447397	0.606378	-0.125431	0.212201
0.105492	1.33835	-0.443235	-1.00061	CASD1	64921	ENSG00000127995	7	94509219	94557019	CAS1 domain containing 1	-0.0749236	0.108157	0.488481	0.644781	-0.0677789	0.103181
0.909811	0.766523	-0.538467	-1.13787	CASK	8573	ENSG00000147044	X	41514934	41923554	calcium/calmodulin dependent serine protein kinase	-0.179487	0.0601464	0.00284346	0.00937805	-0.174425	0.0595035
0.652045	0.258706	-1.4784	0.567653	CASKIN1	57524	ENSG00000167971	16	2177180	2196605	CASK interacting protein 1	-0.226867	0.675278	0.7369	0.839643	-0.0443979	0.301455
-1.49035	0.339945	0.547191	0.603216	CASKIN2	57513	ENSG00000177303	17	75500261	75515537	CASK interacting protein 2	0.115155	0.13505	0.393835	0.557605	0.0995982	0.126334
1.05342	0.233787	0.0660469	-1.35325	CASP1	834	ENSG00000137752	11	105025397	105035250	caspase 1	-0.986833	1.74533	0.571793		-0.0345761	0.329333
0.710336	1.00843	-0.885824	-0.832946	CASP10	843	ENSG00000003400	2	201182872	201229428	caspase 10	-0.666604	0.122315	5.03977e-08	3.91544e-07	-0.636034	0.123199
-1.49126	0.541848	0.600905	0.348508	CASP2	835	ENSG00000106144	7	143288215	143307696	caspase 2	0.0286274	0.0770234	0.710137	0.820852	0.0272436	0.0750718
0.456957	1.19351	-0.873742	-0.776724	CASP3	836	ENSG00000164305	4	184627696	184649509	caspase 3	-0.232261	0.0787327	0.00317782	0.0103644	-0.222003	0.0776321
0.945205	0.779891	-0.934592	-0.790504	CASP4	837	ENSG00000196954	11	104942866	104969366	caspase 4	-0.87503	0.0891667	9.85697e-23	3.04647e-21	-0.860675	0.0895263
-0.957194	-0.654262	0.383044	1.22841	CASP6	839	ENSG00000138794	4	109688622	109703583	caspase 6	0.219066	0.097812	0.025113	0.0626462	0.204284	0.0954672
0.501745	0.999408	-0.192587	-1.30857	CASP7	840	ENSG00000165806	10	113679162	113730907	caspase 7	-0.127231	0.110126	0.24796	0.398215	-0.115186	0.105429
-1.29929	0.0967793	1.13953	0.0629827	CASP8	841	ENSG00000064012	2	201233443	201361836	caspase 8	0.108384	0.0848226	0.20133	0.34077	0.102115	0.082567
-0.742899	-0.95999	1.04715	0.655735	CASP8AP2	9994	ENSG00000118412	6	89829894	89874436	caspase 8 associated protein 2	0.33489	0.0834064	5.94062e-05	0.000283421	0.321212	0.0827566
-0.221727	-0.821746	1.4521	-0.408627	CASP9	842	ENSG00000132906	1	15490832	15526534	caspase 9	0.0421814	0.138953	0.761458	0.855974	0.036094	0.128382
0.807371	0.886337	-0.593637	-1.10007	CASS4	57091	ENSG00000087589	20	56412112	56460387	Cas scaffold protein family member 4	-2.64811	1.29341	0.0406192		-0.200348	0.411489
0.933609	0.795626	-0.875295	-0.85394	CAST	831	ENSG00000153113	5	96525267	96779595	calpastatin	-0.35525	0.0496986	8.79926e-13	1.2315e-11	-0.350226	0.0495951
0.645798	1.02786	-0.585965	-1.0877	CASTOR1	652968	ENSG00000239282	22	30285117	30289622	cytosolic arginine sensor for mTORC1 subunit 1	-0.572889	0.764785	0.453806	0.612465	-0.0936754	0.3205
1.0276	0.685293	-0.91725	-0.795647	CASTOR2	729438	ENSG00000274070	7	74964705	75031528	cytosolic arginine sensor for mTORC1 subunit 2	-0.944869	0.125363	4.80641e-14	7.58556e-13	-0.917639	0.12634
1.09503	0.53442	-0.508347	-1.12111	CASTOR3	352954	ENSG00000239521	7	100200653	100272218	CASTOR family member 3, pseudogene	-0.932338	0.248899	0.00017979	0.000780542	-0.818126	0.257906
0.95297	0.774089	-0.838345	-0.888714	CASZ1	54897	ENSG00000130940	1	10636604	10796650	castor zinc finger 1	-0.439498	0.13985	0.0016743	0.00587004	-0.398262	0.138634
-0.813161	-0.914337	0.790833	0.936664	CAT	847	ENSG00000121691	11	34438934	34472060	catalase	0.52839	0.0758198	3.19149e-12	4.20947e-11	0.516294	0.0758863
-0.131606	0.910261	-1.35134	0.57269	CATIP-AS1	101928513	ENSG00000225062	2	218366665	218367835	CATIP antisense RNA 1	-0.724122	2.43229	0.765923		-0.0132318	0.329926
0.402219	0.958414	-1.3853	0.0246668	CATSPER1	117144	ENSG00000175294	11	66016752	66026479	cation channel sperm associated 1	-1.96958	2.56071	0.441802		-0.033241	0.332413
0.29391	-1.47762	0.713634	0.470079	CATSPER2	117155	ENSG00000166762	15	43628503	43668118	cation channel sperm associated 2	0.348943	0.36352	0.337105	0.499212	0.1704	0.269783
1.29329	0.285303	-0.787065	-0.791531	CATSPER2P1	440278	ENSG00000205771	15	43726918	43747094	cation channel sperm associated 2 pseudogene 1	-0.450296	0.590493	0.445716	0.60489	-0.112952	0.308777
-1.07888	-0.433907	1.25813	0.25466	CATSPER3	347732	ENSG00000152705	5	134967907	135011696	cation channel sperm associated 3	0.434071	0.653983	0.50686	0.661586	0.0920264	0.310227
-0.806567	1.44194	-0.132744	-0.502629	CATSPER4	378807	ENSG00000188782	1	26190561	26202968	cation channel sperm associated 4	-0.60217	2.27847	0.791559		-0.0123334	0.329483
1.1096	0.577404	-0.922218	-0.764789	CATSPERB	79820	ENSG00000133962	14	91580696	91780707	cation channel sperm associated auxiliary subunit beta	-0.960244	0.438188	0.0284229	0.0696425	-0.558992	0.466548
-0.0114159	1.25489	-0.0507775	-1.1927	CATSPERE	257044	ENSG00000179397	1	244454377	244641177	catsper channel auxiliary subunit epsilon	-0.63303	1.09196	0.562103		-0.0537587	0.324052
0.579246	-0.491725	1.05598	-1.1435	CATSPERG	57828	ENSG00000099338	19	38335775	38370943	cation channel sperm associated auxiliary subunit gamma	-0.0413342	1.22024	0.972978		-0.00261562	0.320867
0.819908	0.900838	-0.994089	-0.726657	CAV1	857	ENSG00000105974	7	116524994	116561179	caveolin 1	-1.40508	0.217963	1.14524e-10	1.25718e-09	-1.34182	0.221703
0.856678	0.86704	-0.981741	-0.741977	CAV2	858	ENSG00000105971	7	116287380	116508541	caveolin 2	-1.12173	0.0970952	7.13989e-31	3.61098e-29	-1.10722	0.0974865
0.761536	0.964219	-0.887655	-0.8381	CAVIN1	284119	ENSG00000177469	17	42402449	42423256	caveolae associated protein 1	-1.1279	0.108616	2.92343e-25	1.04206e-23	-1.10976	0.109244
0.714263	0.987825	-0.670105	-1.03198	CAVIN2	8436	ENSG00000168497	2	191834310	191847088	caveolae associated protein 2	-1.70817	0.365768	3.01051e-06	1.80018e-05	-1.54915	0.381849
0.0651411	1.33871	-1.03225	-0.371598	CAVIN3	112464	ENSG00000170955	11	6318946	6320532	caveolae associated protein 3	-0.288661	0.148095	0.0512767	0.114073	-0.249822	0.14215
0.719437	-0.972932	0.993836	-0.740341	CAVIN4	347273	ENSG00000170681	9	100578079	100588389	caveolae associated protein 4	0.0735959	0.563648	0.896115	0.944354	0.0195301	0.286843
-0.925805	-0.79381	0.729017	0.990598	CBARP	255057	ENSG00000099625	19	1228287	1238027	CACN subunit beta associated regulatory protein	0.991482	0.555223	0.074142	0.154565	0.36018	0.460678
0.969872	-0.487902	0.682366	-1.16434	CBFA2T2	9139	ENSG00000078699	20	33490075	33650036	CBFA2/RUNX1 partner transcriptional co-repressor 2	-0.0321895	0.105035	0.759251	0.854357	-0.0291708	0.100197
-1.15769	-0.463981	0.556309	1.06536	CBFB	865	ENSG00000067955	16	67028984	67101058	core-binding factor subunit beta	0.183061	0.0652304	0.0050103	0.0155284	0.177145	0.0644295
0.551964	-1.35579	0.918686	-0.114864	CBL	867	ENSG00000110395	11	119206298	119313926	Cbl proto-oncogene	0.104614	0.0975591	0.28358	0.440411	0.0967847	0.0940063
1.13806	0.538871	-0.773702	-0.903229	CBLB	868	ENSG00000114423	3	105655461	105869552	Cbl proto-oncogene B	-0.342822	0.137693	0.0127831	0.0352366	-0.305826	0.134379
0.772256	0.954761	-0.882985	-0.844032	CBLC	23624	ENSG00000142273	19	44777869	44800652	Cbl proto-oncogene C	-0.885797	0.147769	2.04175e-09	1.93222e-08	-0.846175	0.149604
0.491138	-0.797715	1.17197	-0.865397	CBLL1	79872	ENSG00000105879	7	107743949	107761667	Cbl proto-oncogene like 1	0.0115466	0.0954475	0.903712	0.949041	0.0107197	0.0917429
1.08446	-0.421151	0.512913	-1.17622	CBLL1-AS1	101927974	ENSG00000241764	7	107739999	107744581	CBLL1 antisense RNA 1	-0.07861	0.391376	0.840811	0.910421	-0.032692	0.254444
0.254434	-1.4774	0.562753	0.660208	CBLN1	869	ENSG00000102924	16	49277917	49281838	cerebellin 1 precursor	0.877583	0.778348	0.259534	0.412442	0.14863	0.345577
1.44666	-0.110264	-0.636278	-0.700118	CBLN3	643866	ENSG00000139899	14	24426545	24430954	cerebellin 3 precursor	-0.833056	0.612623	0.173887	0.303966	-0.220904	0.367735
-1.05213	-0.648166	0.733125	0.967173	CBR1	873	ENSG00000159228	21	36069941	36073166	carbonyl reductase 1	0.650178	0.0859417	3.86857e-14	6.16163e-13	0.635227	0.0862847
0.321736	-1.40388	0.128719	0.953429	CBR1-AS1	100133286	ENSG00000230212	21	36069642	36126640	CBR1 antisense RNA 1	1.27862	2.36795	0.589218		0.0254096	0.330794
-0.912712	-0.787483	0.624824	1.07537	CBR3	874	ENSG00000159231	21	36135079	36146562	carbonyl reductase 3	0.785112	0.394639	0.0466525	0.105396	0.455113	0.390049
-0.263174	1.17773	-1.20744	0.292887	CBR3-AS1	100506428	ENSG00000236830	21	36131767	36175815	CBR3 antisense RNA 1	-0.357957	0.499693	0.473773	0.63109	-0.113694	0.293698
[truncated: 18,827 more rows]

## Sheet: DEGs_Prim_IKKa_KO_vs_CT
CT1B	CT2B	K1B	K2B	gene_name	Entrez	gene_id	chrom	start	end	gene_description	log2FoldChange KO_IKKa_vs_CT	lfcSE KO_IKKa_vs_CT	P_Value KO_IKKa_vs_CT	Adjusted_P_Value KO_IKKa_vs_CT	Shrunken_lFC KO_IKKa_vs_CT	Shrunken_lFCSE KO_IKKa_vs_CT
0.871773	0.860239	-0.87179	-0.860222	S100P	6286	ENSG00000163993	4	6693878	6697170	S100 calcium binding protein P	-1.97497	0.0604145	2.14399e-234	3.3397e-230	-1.97138	0.0604582
0.926739	0.801595	-0.91433	-0.814004	ASS1	445	ENSG00000130707	9	130444961	130501274	argininosuccinate synthase 1	-2.77666	0.0851978	5.54778e-233	4.32089e-229	-2.7715	0.085201
0.872847	0.859166	-0.870274	-0.861739	UCA1	652995	ENSG00000214049	19	15828206	15836328	urothelial cancer associated 1	-2.70206	0.0830583	3.75777e-232	1.95116e-228	-2.69716	0.0831089
0.85997	0.871587	-0.89445	-0.837107	PHGDH	26227	ENSG00000092621	1	119648411	119744218	phosphoglycerate dehydrogenase	-2.01942	0.066553	3.11055e-202	1.21133e-198	-2.01522	0.0665997
0.895681	0.835694	-0.849196	-0.882178	ALDH1L2	160428	ENSG00000136010	12	105019784	105107643	aldehyde dehydrogenase 1 family member L2	-3.41695	0.120461	5.35353e-177	1.66784e-173	-3.40861	0.120567
-0.800811	-0.928758	0.850486	0.879082	CXCR4	7852	ENSG00000121966	2	136114349	136119177	C-X-C motif chemokine receptor 4	2.0847	0.0739031	4.59003e-175	1.19165e-171	2.07978	0.0739093
0.938296	0.79017	-0.837476	-0.890991	GALNT5	11227	ENSG00000136542	2	157257705	157318491	polypeptide N-acetylgalactosaminyltransferase 5	-1.76634	0.0632109	7.88247e-172	1.75408e-168	-1.76237	0.0632659
0.865024	0.866601	-0.892948	-0.838677	TACSTD2	4070	ENSG00000184292	1	58575433	58577252	tumor associated calcium signal transducer 2	-3.38707	0.128952	4.68141e-152	9.11529e-149	-3.37732	0.128964
0.838666	0.892838	-0.880396	-0.851107	PLAU	5328	ENSG00000122861	10	73909177	73917496	plasminogen activator, urokinase	-1.69655	0.0661787	6.08125e-145	1.05253e-141	-1.69165	0.0662573
0.873425	0.858544	-0.856756	-0.875214	TIMP2	7077	ENSG00000035862	17	78852977	78925387	TIMP metallopeptidase inhibitor 2	-1.69325	0.066114	1.14654e-144	1.78596e-141	-1.68832	0.0661918
0.895645	0.835419	-0.837219	-0.893845	C1orf116	79098	ENSG00000182795	1	207018522	207032756	chromosome 1 open reading frame 116	-1.75648	0.069654	2.59508e-140	3.67487e-137	-1.75126	0.0697439
0.82944	0.899681	-0.9265	-0.802621	KRT80	144501	ENSG00000167767	12	52168996	52192014	keratin 80	-1.70829	0.0685902	6.4532e-137	8.37679e-134	-1.70315	0.0686645
0.893995	0.837596	-0.864979	-0.866613	APOL6	80830	ENSG00000221963	22	35648446	35668404	apolipoprotein L6	-2.08856	0.084536	9.17055e-135	1.09884e-131	-2.08196	0.0846358
0.925956	0.803878	-0.875421	-0.854413	SLPI	6590	ENSG00000124107	20	45252239	45254564	secretory leukocyte peptidase inhibitor	-2.81114	0.11482	2.23632e-132	2.48823e-129	-2.80185	0.114905
0.878949	0.847685	-0.958828	-0.767806	LCN2	3934	ENSG00000148346	9	128149071	128153453	lipocalin 2	-1.75363	0.0723984	1.30502e-129	1.35522e-126	-1.7479	0.0724673
0.904563	0.826492	-0.879717	-0.851337	F3	2152	ENSG00000117525	1	94529173	94541759	coagulation factor III, tissue factor	-1.39352	0.0592685	3.0796e-122	2.99819e-119	-1.3889	0.0593361
0.917067	0.812935	-0.893893	-0.83611	TRIM31	11074	ENSG00000204616	6	30102897	30113090	tripartite motif containing 31	-1.94158	0.0829591	3.88631e-121	3.561e-118	-1.93473	0.083041
0.785521	0.942943	-0.867506	-0.860958	DDIT4	54541	ENSG00000168209	10	72273919	72276036	DNA damage inducible transcript 4	-1.54732	0.0662706	1.42773e-120	1.23554e-117	-1.53816	0.0663681
0.857599	0.873821	-0.89774	-0.83368	KLF4	9314	ENSG00000136826	9	107484852	107490482	KLF transcription factor 4	-2.04451	0.087854	8.57345e-120	7.02888e-117	-2.03734	0.0879587
0.852691	0.879164	-0.853133	-0.878722	FGFBP1	9982	ENSG00000137440	4	15935577	15938740	fibroblast growth factor binding protein 1	-2.19061	0.09446	5.63052e-119	4.38533e-116	-2.18274	0.0946143
0.788009	0.939918	-0.900902	-0.827026	ID1	3397	ENSG00000125968	20	31605283	31606515	inhibitor of DNA binding 1	-1.52924	0.0668694	9.45199e-116	7.01112e-113	-1.52626	0.0669838
-0.777811	-0.949443	0.833105	0.89415	LYZ	4069	ENSG00000090382	12	69348381	69354234	lysozyme	1.18378	0.0518586	2.46975e-115	1.7487e-112	1.17994	0.0519224
-0.863886	-0.866511	0.811707	0.91869	ETS2	2114	ENSG00000157557	21	38805183	38824955	ETS proto-oncogene 2, transcription factor	1.39309	0.0611589	7.53681e-115	5.10438e-112	1.38828	0.0612368
0.819412	0.908619	-0.793547	-0.934483	EMP1	2012	ENSG00000134531	12	13196723	13219941	epithelial membrane protein 1	-1.74646	0.0770874	1.22766e-113	7.968e-111	-1.74003	0.0772451
0.933114	0.7961	-0.87933	-0.849884	SLC16A4	9122	ENSG00000168679	1	110362851	110391082	solute carrier family 16 member 4	-2.19668	0.0977358	7.18402e-112	4.47622e-109	-2.18823	0.0978468
0.878833	0.852652	-0.894166	-0.837319	MAL2	114569	ENSG00000147676	8	119165034	119245673	mal, T cell differentiation protein 2	-1.12416	0.0500403	9.13482e-112	5.47281e-109	-1.12018	0.0500986
0.922287	0.807873	-0.866061	-0.864099	LAMB3	3914	ENSG00000196878	1	209614870	209652425	laminin subunit beta 3	-1.28794	0.0574176	1.96108e-111	1.1314e-108	-1.2833	0.0574856
0.795073	0.933822	-0.839	-0.889896	FOSB	2354	ENSG00000125740	19	45467995	45475179	FosB proto-oncogene, AP-1 transcription factor subunit	-1.4235	0.0640151	1.50947e-109	8.39753e-107	-1.4183	0.0641232
-0.846787	-0.884613	0.893431	0.837969	SMOC2	64094	ENSG00000112562	6	168441151	168673445	SPARC related modular calcium binding 2	5.10674	0.22972	1.74916e-109	9.39541e-107	5.08666	0.229059
0.900094	0.829795	-0.81488	-0.915009	BHLHE40	8553	ENSG00000134107	3	4979437	4985323	basic helix-loop-helix family member e40	-1.5692	0.0730012	1.71301e-102	8.89451e-100	-1.56289	0.0731289
0.93154	0.797929	-0.867051	-0.862418	ITGB4	3691	ENSG00000132470	17	75721328	75757818	integrin subunit beta 4	-1.11721	0.0521709	9.81957e-102	4.93418e-99	-1.11278	0.0522412
0.926404	0.802928	-0.894564	-0.834768	ZNF185	7739	ENSG00000147394	X	152898067	152973481	zinc finger protein 185 with LIM domain	-1.77264	0.0834617	4.16466e-100	2.02728e-97	-1.76521	0.0835702
0.937603	0.791321	-0.856603	-0.872321	GCNT3	9245	ENSG00000140297	15	59594875	59640239	glucosaminyl (N-acetyl) transferase 3, mucin type	-1.14734	0.0553671	2.17311e-95	1.02577e-92	-1.14256	0.0554407
-0.874863	-0.856095	0.907952	0.823006	PEG10	23089	ENSG00000242265	7	94656325	94669695	paternally expressed 10	1.44269	0.069628	2.29009e-95	1.0492e-92	1.43669	0.0697582
0.891702	0.838713	-0.819063	-0.911352	DHRS3	9249	ENSG00000162496	1	12567910	12618210	dehydrogenase/reductase 3	-2.02478	0.0978462	3.96023e-95	1.76253e-92	-2.01567	0.0980557
0.812498	0.916422	-0.812342	-0.916579	CHAC1	79094	ENSG00000128965	15	40952962	40956512	ChaC glutathione specific gamma-glutamylcyclotransferase 1	-3.33681	0.165638	2.96724e-90	1.28391e-87	-3.3204	0.16608
0.827315	0.903887	-0.863387	-0.867815	CLDN4	1364	ENSG00000189143	7	73799542	73832690	claudin 4	-1.0448	0.052394	1.78494e-88	7.51458e-86	-1.04036	0.0524698
0.829457	0.901697	-0.849816	-0.881337	HBEGF	1839	ENSG00000113070	5	140332843	140346603	heparin binding EGF like growth factor	-1.47389	0.0740508	3.77928e-88	1.54921e-85	-1.46701	0.0742006
0.879678	0.851484	-0.902187	-0.828975	ADGRF1	266977	ENSG00000153292	6	46997708	47042350	adhesion G protein-coupled receptor F1	-1.38068	0.0696025	1.43737e-87	5.74099e-85	-1.37431	0.0697126
0.961184	0.76511	-0.844597	-0.881697	DPP4	1803	ENSG00000197635	2	161992245	162074394	dipeptidyl peptidase 4	-1.22019	0.0616466	3.39938e-87	1.29151e-84	-1.21475	0.06174
0.869754	0.862251	-0.874025	-0.85798	AREG	374	ENSG00000109321	4	74445136	74455005	amphiregulin	-1.54365	0.0781885	9.28005e-87	3.44179e-84	-1.53627	0.0783305
0.851689	0.879211	-0.907908	-0.822992	TNFAIP2	7127	ENSG00000185215	14	103121476	103137439	TNF alpha induced protein 2	-1.93222	0.0979725	1.39367e-86	5.04866e-84	-1.92272	0.098138
0.839635	0.891184	-0.903725	-0.827094	LOXL4	84171	ENSG00000138131	10	98247690	98268194	lysyl oxidase like 4	-3.02087	0.153633	4.48789e-86	1.58882e-83	-3.00541	0.153773
0.908103	0.819064	-0.94399	-0.783177	PPL	5493	ENSG00000118898	16	4882507	4960741	periplakin	-1.59947	0.0820637	1.32017e-84	4.56985e-82	-1.59162	0.0821822
0.822572	0.908409	-0.868449	-0.862533	PCK2	5106	ENSG00000100889	14	24094053	24110598	phosphoenolpyruvate carboxykinase 2, mitochondrial	-2.00461	0.103265	6.07858e-84	2.05839e-81	-1.99432	0.103494
0.745424	0.974722	-0.94613	-0.774015	KLK10	5655	ENSG00000129451	19	51012739	51020175	kallikrein related peptidase 10	-1.32195	0.0682509	1.41237e-83	4.68096e-81	-1.31556	0.0683769
0.819479	0.910655	-0.900266	-0.829868	SEMA3B	7869	ENSG00000012171	3	50267558	50277546	semaphorin 3B	-1.63461	0.0849783	1.86454e-82	6.05081e-80	-1.62631	0.0851478
0.901083	0.829722	-0.895118	-0.835687	SLC14A1	6563	ENSG00000141469	18	45687025	45752520	solute carrier family 14 member 1 (Kidd blood group)	-1.14578	0.0599458	1.9453e-81	6.0604e-79	-1.14035	0.0600361
0.871012	0.856847	-0.948798	-0.77906	EZR	7430	ENSG00000092820	6	158765741	158819368	ezrin	-1.01958	0.0534258	3.42303e-81	1.0455e-78	-1.01491	0.0535001
0.91293	0.817748	-0.875941	-0.854737	ITGA3	3675	ENSG00000005884	17	50055968	50090481	integrin subunit alpha 3	-1.06872	0.0561326	8.08378e-81	2.42156e-78	-1.06372	0.056214
0.839814	0.890375	-0.814265	-0.915924	RND3	390	ENSG00000115963	2	150468195	150539011	Rho family GTPase 3	-1.24997	0.0656883	9.83399e-81	2.89026e-78	-1.244	0.06582
-0.902325	-0.828803	0.881263	0.849866	CDCA7	83879	ENSG00000144354	2	173354820	173368997	cell division cycle associated 7	1.28112	0.067507	2.61273e-80	7.53676e-78	1.27488	0.0676523
0.926793	0.802531	-0.893964	-0.83536	NRP1	8829	ENSG00000099250	10	33177492	33336262	neuropilin 1	-1.68934	0.0890338	2.79207e-80	7.90765e-78	-1.68052	0.0891843
0.916447	0.807599	-0.966282	-0.757764	RHOF	54509	ENSG00000139725	12	121777754	121803403	ras homolog family member F, filopodia associated	-1.43991	0.0762943	1.89901e-79	5.18963e-77	-1.43243	0.0764108
0.896722	0.831084	-0.943069	-0.784737	CD74	972	ENSG00000019582	5	150401637	150412969	CD74 molecule	-1.8678	0.0989762	1.96796e-79	5.28533e-77	-1.85777	0.0991226
0.876972	0.854708	-0.843068	-0.888612	VSIR	64115	ENSG00000107738	10	71747556	71773520	V-set immunoregulatory receptor	-2.12662	0.112995	5.1316e-79	1.35483e-76	-2.115	0.113261
0.805871	0.924053	-0.851174	-0.87875	TMPRSS3	64699	ENSG00000160183	21	42371887	42396091	transmembrane serine protease 3	-2.0137	0.107695	5.12569e-78	1.33071e-75	-2.00257	0.107976
0.973466	0.751172	-0.883738	-0.8409	MYOF	26509	ENSG00000138119	10	93306429	93482334	myoferlin	-1.03143	0.0553592	1.78337e-77	4.55402e-75	-1.02641	0.0554415
0.907001	0.822395	-0.91766	-0.811736	ACSL5	51703	ENSG00000197142	10	112374116	112428379	acyl-CoA synthetase long chain family member 5	-1.03266	0.0556509	7.2917e-77	1.83198e-74	-1.02755	0.0557305
0.797188	0.93217	-0.854359	-0.874998	PPP1R15A	23645	ENSG00000087074	19	48872421	48876058	protein phosphatase 1 regulatory subunit 15A	-1.14034	0.0617019	2.91448e-76	7.20617e-74	-1.13456	0.0618217
0.900356	0.824475	-0.757343	-0.967487	EREG	2069	ENSG00000124882	4	74365145	74388749	epiregulin	-1.22686	0.0667539	1.93927e-75	4.72e-73	-1.22043	0.0668923
0.920436	0.80158	-0.743539	-0.978477	LAMA5	3911	ENSG00000130702	20	62307955	62367312	laminin subunit alpha 5	-1.15299	0.0630319	9.56572e-75	2.29239e-72	-1.14687	0.0631529
0.912226	0.814189	-0.948899	-0.777516	ELF3	1999	ENSG00000163435	1	202007945	202017183	E74 like ETS transcription factor 3	-1.0851	0.0595693	3.86566e-74	8.98738e-72	-1.0794	0.0596606
0.919939	0.809813	-0.895648	-0.834104	SMAD3	4088	ENSG00000166949	15	67063763	67195173	SMAD family member 3	-1.41391	0.0776186	3.84716e-74	8.98738e-72	-1.40612	0.077759
0.958534	0.768051	-0.843774	-0.882811	LIPH	200879	ENSG00000163898	3	185506262	185552588	lipase H	-1.35636	0.0745754	6.45422e-74	1.47849e-71	-1.34893	0.0747173
0.873221	0.858784	-0.871207	-0.860798	IL1RN	3557	ENSG00000136689	2	113099315	113134016	interleukin 1 receptor antagonist	-1.47791	0.0813344	8.79063e-74	1.98452e-71	-1.46971	0.0815067
0.848976	0.87872	-0.778341	-0.949355	DUSP1	1843	ENSG00000120129	5	172768096	172771195	dual specificity phosphatase 1	-1.30846	0.0720291	9.64413e-74	2.14609e-71	-1.30134	0.0722005
0.907355	0.823187	-0.89426	-0.836282	BIRC3	330	ENSG00000023445	11	102317450	102339403	baculoviral IAP repeat containing 3	-1.88186	0.103755	1.60912e-73	3.53031e-71	-1.87096	0.103953
0.905008	0.822111	-0.78103	-0.94609	ALS2CL	259173	ENSG00000178038	3	46668995	46693704	ALS2 C-terminal like	-1.84877	0.101959	1.76802e-73	3.82507e-71	-1.83804	0.10225
0.916999	0.813454	-0.874512	-0.85594	MUC20	200958	ENSG00000176945	3	195720884	195741123	mucin 20, cell surface associated	-3.0036	0.165804	2.41164e-73	5.14605e-71	-2.98548	0.166035
0.989404	0.732698	-0.834424	-0.887677	TGM2	7052	ENSG00000198959	20	38127385	38166578	transglutaminase 2	-2.37845	0.132624	6.42743e-72	1.35297e-69	-2.364	0.132924
1.01692	0.699658	-0.819281	-0.897294	B3GALT5	10317	ENSG00000183778	21	39556442	39673137	beta-1,3-galactosyltransferase 5	-1.26642	0.0717094	8.4647e-70	1.7124e-67	-1.25965	0.0718591
0.858288	0.87317	-0.896901	-0.834557	GALC	2581	ENSG00000054983	14	87837820	87993665	galactosylceramidase	-1.15102	0.0652993	1.53167e-69	3.05882e-67	-1.14459	0.065422
0.912423	0.818282	-0.876017	-0.854688	AMIGO2	347902	ENSG00000139211	12	47075707	47079959	adhesion molecule with Ig like domain 2	-1.6723	0.0949699	2.11017e-69	4.16078e-67	-1.66217	0.0951755
0.889137	0.842088	-0.835998	-0.895226	CD47	961	ENSG00000196776	3	108043091	108091862	CD47 molecule	-1.0664	0.0607489	5.52594e-69	1.07597e-66	-1.06053	0.0608604
0.83355	0.897852	-0.875178	-0.856224	NFKBIA	4792	ENSG00000100906	14	35401513	35404749	NFKB inhibitor alpha	-1.36265	0.0777233	8.15686e-69	1.56863e-66	-1.35453	0.0778998
0.869138	0.862906	-0.864484	-0.86756	SCEL	8796	ENSG00000136155	13	77535674	77645263	sciellin	-2.77832	0.159909	1.29007e-67	2.45066e-65	-2.76016	0.160253
0.967394	0.753887	-0.77579	-0.945491	FER1L4	80307	ENSG00000088340	20	35558737	35607562	fer-1 like family member 4 (pseudogene)	-1.87978	0.108803	7.02265e-67	1.31797e-64	-1.86777	0.109121
0.872553	0.859219	-0.886815	-0.844957	LAMB2	3913	ENSG00000172037	3	49121114	49133118	laminin subunit beta 2	-1.14667	0.0664658	1.08099e-66	2.00459e-64	-1.13997	0.0665954
0.75841	0.966455	-0.90242	-0.822446	JUNB	3726	ENSG00000171223	19	12791486	12793315	JunB proto-oncogene, AP-1 transcription factor subunit	-1.22529	0.0717609	2.29336e-65	4.20279e-63	-1.21785	0.0719293
0.991827	0.730141	-0.843862	-0.878106	SLC44A4	80736	ENSG00000204385	6	31863192	31879046	solute carrier family 44 member 4	-1.26792	0.0746744	1.16859e-64	2.11664e-62	-1.26025	0.0748266
0.742939	0.980844	-0.873541	-0.850243	GLIPR1	11010	ENSG00000139278	12	75480753	75503863	GLI pathogenesis related 1	-1.22901	0.0726253	3.06315e-64	5.48445e-62	-1.22134	0.0728094
0.936589	0.792179	-0.886018	-0.84275	CAMK2N1	55450	ENSG00000162545	1	20482391	20486210	calcium/calmodulin dependent protein kinase II inhibitor 1	-1.21173	0.0716865	4.25986e-64	7.54043e-62	-1.20468	0.0718237
0.898658	0.832762	-0.862917	-0.868503	FRMD3	257019	ENSG00000172159	9	83242990	83538546	FERM domain containing 3	-4.73932	0.28046	4.62196e-64	8.08947e-62	-4.70617	0.279872
0.897894	0.833344	-0.884737	-0.846501	ITGB6	3694	ENSG00000115221	2	160099667	160200313	integrin subunit beta 6	-1.27682	0.0768675	5.83283e-62	9.9844e-60	-1.26857	0.0770368
1.01004	0.708517	-0.835968	-0.882594	LAMC2	3918	ENSG00000058085	1	183186238	183245127	laminin subunit gamma 2	-1.24199	0.0757303	1.90883e-60	3.16317e-58	-1.23378	0.0758953
0.900655	0.829094	-0.916866	-0.812883	HLA-B	3106	ENSG00000234745	6	31353872	31367067	major histocompatibility complex, class I, B	-1.16069	0.0708474	2.53092e-60	4.14992e-58	-1.15355	0.0709874
0.870366	0.858634	-0.79207	-0.936929	ATF3	467	ENSG00000162772	1	212565334	212620777	activating transcription factor 3	-1.15207	0.0704072	3.51579e-60	5.70473e-58	-1.14457	0.0705815
0.840214	0.889734	-0.919979	-0.80997	APOL1	8542	ENSG00000100342	22	36253071	36267530	apolipoprotein L1	-2.45846	0.151993	7.59676e-59	1.21995e-56	-2.44005	0.152318
0.813849	0.916674	-0.86388	-0.866643	TMEM154	201799	ENSG00000170006	4	152618628	152680012	transmembrane protein 154	-1.55415	0.0963217	1.44849e-58	2.27911e-56	-1.54307	0.0966134
0.886293	0.845304	-0.846634	-0.884962	TSPAN1	10103	ENSG00000117472	1	46175073	46185962	tetraspanin 1	-1.0352	0.0647711	1.69441e-57	2.63938e-55	-1.02847	0.0649065
0.957025	0.769866	-0.876333	-0.850558	LTBP3	4054	ENSG00000168056	11	65538559	65558930	latent transforming growth factor beta binding protein 3	-1.4532	0.0915216	8.96964e-57	1.36981e-54	-1.44256	0.0917452
0.909487	0.819573	-0.9207	-0.80836	RAB27B	5874	ENSG00000041353	18	54717860	54895516	RAB27B, member RAS oncogene family	-1.12738	0.0712761	2.37248e-56	3.55348e-54	-1.11939	0.071427
0.930829	0.798696	-0.862162	-0.867363	HHLA2	11148	ENSG00000114455	3	108296490	108378285	HERV-H LTR-associating 2	-2.41197	0.152671	3.18909e-56	4.73109e-54	-2.39304	0.153079
1.04568	0.665147	-0.873634	-0.837194	CYP3A5	1577	ENSG00000106258	7	99648194	99679998	cytochrome P450 family 3 subfamily A member 5	-1.99167	0.126363	5.7327e-56	8.42436e-54	-1.97596	0.126675
0.776776	0.948126	-0.933269	-0.791633	ADM2	79924	ENSG00000128165	22	50481543	50486440	adrenomedullin 2	-2.74616	0.17457	9.27284e-56	1.34994e-53	-2.72427	0.174922
0.836524	0.889741	-0.959554	-0.76671	TRIM29	23650	ENSG00000137699	11	120111286	120185529	tripartite motif containing 29	-1.78264	0.113494	1.3555e-55	1.95505e-53	-1.76894	0.11378
0.912275	0.816073	-0.8002	-0.928148	DDX60	55601	ENSG00000137628	4	168216291	168318883	DExD/H-box helicase 60	-1.67567	0.106729	1.50639e-55	2.15276e-53	-1.66283	0.107083
0.893275	0.831546	-0.969854	-0.754967	CCNG2	901	ENSG00000138764	4	77157207	77433388	cyclin G2	-1.48406	0.0946237	1.95202e-55	2.76423e-53	-1.47295	0.0948431
0.849208	0.882674	-0.862571	-0.869312	VGLL3	389136	ENSG00000206538	3	86876388	86991149	vestigial like family member 3	-3.951	0.252143	2.43822e-55	3.42164e-53	-3.9189	0.252234
0.871962	0.858582	-0.915907	-0.814637	PI3	5266	ENSG00000124102	20	45174902	45176544	peptidase inhibitor 3	-3.72972	0.238459	3.82956e-55	5.27903e-53	-3.69944	0.238358
-0.75395	-0.968755	0.929242	0.793463	EPHB3	2049	ENSG00000182580	3	184561785	184582408	EPH receptor B3	1.51949	0.0971557	3.90131e-55	5.33076e-53	1.50823	0.0973466
0.811628	0.918757	-0.861231	-0.869153	SLC6A9	6536	ENSG00000196517	1	43991500	44031467	solute carrier family 6 member 9	-2.3401	0.150302	1.17628e-54	1.57956e-52	-2.32122	0.150807
1.02308	0.689896	-0.78505	-0.927926	TNFSF15	9966	ENSG00000181634	9	114784652	114806039	TNF superfamily member 15	-1.35056	0.0874895	9.24902e-54	1.23139e-51	-1.34022	0.0877273
0.714595	1.00521	-0.856157	-0.863652	ID2	3398	ENSG00000115738	2	8678845	8684461	inhibitor of DNA binding 2	-1.06475	0.0694612	4.91243e-53	6.32404e-51	-1.05697	0.0696469
0.916198	0.813611	-0.900247	-0.829562	CALCOCO1	57658	ENSG00000012822	12	53708517	53727745	calcium binding and coiled-coil domain 1	-1.73259	0.113037	4.99932e-53	6.38314e-51	-1.71887	0.113345
0.779806	0.947697	-0.89239	-0.835113	TSC22D3	1831	ENSG00000157514	X	107713221	107777342	TSC22 domain family member 3	-1.71649	0.112642	1.96699e-52	2.49105e-50	-1.70252	0.113027
-0.796856	-0.928212	0.950605	0.774463	KRT6B	3854	ENSG00000185479	12	52446651	52452146	keratin 6B	1.73947	0.114495	3.96461e-52	4.98038e-50	1.72549	0.11478
0.71914	0.999616	-0.80217	-0.916586	ID3	3399	ENSG00000117318	1	23557926	23559501	inhibitor of DNA binding 3	-1.48698	0.0984852	1.65648e-51	2.04786e-49	-1.47481	0.0988733
0.849162	0.880374	-0.928881	-0.800654	UNC13D	201294	ENSG00000092929	17	75827225	75844552	unc-13 homolog D	-1.74898	0.115992	2.2437e-51	2.75198e-49	-1.73443	0.11633
-0.925891	-0.801935	0.922788	0.805039	SLC39A8	64116	ENSG00000138821	4	102251080	102431258	solute carrier family 39 member 8	1.14159	0.0760782	6.76557e-51	8.23338e-49	1.13303	0.0763218
0.879139	0.851724	-0.908664	-0.822198	PHACTR3	116154	ENSG00000087495	20	59577509	59847711	phosphatase and actin regulator 3	-1.81858	0.121514	1.22427e-50	1.46696e-48	-1.80314	0.121876
0.885627	0.845767	-0.83847	-0.892924	CYP4F3	4051	ENSG00000186529	19	15640897	15662825	cytochrome P450 family 4 subfamily F member 3	-1.25167	0.0841836	5.28819e-50	6.2881e-48	-1.24163	0.0844338
0.985031	0.737612	-0.830562	-0.892081	SLC15A1	6564	ENSG00000088386	13	98683801	98752672	solute carrier family 15 member 1	-1.86715	0.125783	7.58728e-50	8.95356e-48	-1.85096	0.126197
0.790991	0.937433	-0.833993	-0.894431	IFIT2	3433	ENSG00000119922	10	89283694	89309271	interferon induced protein with tetratricopeptide repeats 2	-1.65921	0.111809	8.11878e-50	9.50873e-48	-1.64529	0.112247
0.899667	0.830922	-0.828573	-0.902016	INAVA	55765	ENSG00000163362	1	200891048	200915742	innate immunity activator	-1.04122	0.0701724	8.31601e-50	9.66705e-48	-1.03327	0.0703466
0.884184	0.846929	-0.901283	-0.82983	PLAUR	5329	ENSG00000011422	19	43646095	43670547	plasminogen activator, urokinase receptor	-1.35232	0.0914165	1.62759e-49	1.87799e-47	-1.34105	0.0916809
0.947784	0.771332	-0.980124	-0.738993	MLPH	79083	ENSG00000115648	2	237485428	237555322	melanophilin	-1.13512	0.0771006	4.61761e-49	5.21222e-47	-1.12642	0.077277
-0.859184	-0.870884	0.923335	0.806733	LGR5	8549	ENSG00000139292	12	71439798	71586310	leucine rich repeat containing G protein-coupled receptor 5	1.96017	0.133173	4.86846e-49	5.45583e-47	1.94303	0.133655
0.943258	0.785181	-0.866023	-0.862416	ADAM8	101	ENSG00000151651	10	133262420	133276868	ADAM metallopeptidase domain 8	-2.1135	0.145305	6.25649e-48	6.91187e-46	-2.09416	0.145775
0.829431	0.901862	-0.864804	-0.866489	ADIRF	10974	ENSG00000148671	10	86968432	86983934	adipogenesis regulatory factor	-1.75281	0.120835	1.11332e-47	1.19601e-45	-1.73705	0.121289
0.896116	0.833617	-0.809769	-0.919964	CCDC68	80323	ENSG00000166510	18	54901509	54959461	coiled-coil domain containing 68	-1.32727	0.0917034	1.78217e-47	1.8885e-45	-1.31575	0.0920143
0.816342	0.903143	-1.00046	-0.719023	FUT3	2525	ENSG00000171124	19	5842888	5851471	fucosyltransferase 3 (Lewis blood group)	-1.74905	0.120885	1.90784e-47	2.008e-45	-1.73323	0.12124
0.82502	0.900662	-0.960715	-0.764968	CARS1	833	ENSG00000110619	11	3000922	3057613	cysteinyl-tRNA synthetase 1	-1.24122	0.086142	4.54299e-47	4.71774e-45	-1.23061	0.0863895
0.872763	0.859016	-0.886465	-0.845314	C3	718	ENSG00000125730	19	6677704	6730562	complement C3	-3.73875	0.259515	4.69891e-47	4.84735e-45	-3.70276	0.259605
0.910252	0.818305	-0.80158	-0.926977	MSLN	10232	ENSG00000102854	16	760734	768865	mesothelin	-1.15121	0.0800359	6.5553e-47	6.67398e-45	-1.14155	0.080276
0.778373	0.949445	-0.866475	-0.861343	OASL	8638	ENSG00000135114	12	121017763	121039242	2'-5'-oligoadenylate synthetase like	-1.62866	0.113436	9.54942e-47	9.65917e-45	-1.6138	0.113884
0.867554	0.856447	-0.979815	-0.744186	TNIP1	10318	ENSG00000145901	5	151029945	151093577	TNFAIP3 interacting protein 1	-1.01478	0.0707064	1.03369e-46	1.03883e-44	-1.00658	0.0708696
0.938604	0.790251	-0.869678	-0.859177	HPGD	3248	ENSG00000164120	4	174490175	174523154	15-hydroxyprostaglandin dehydrogenase	-1.2436	0.0870071	2.4154e-46	2.39648e-44	-1.23275	0.0872585
-0.900644	-0.829543	0.820786	0.9094	SLC9A3	6550	ENSG00000066230	5	470456	524449	solute carrier family 9 member A3	2.11479	0.148331	4.0398e-46	3.98278e-44	2.095	0.149016
1.0349	0.678684	-0.846884	-0.866697	COL17A1	1308	ENSG00000065618	10	104031286	104085880	collagen type XVII alpha 1 chain	-1.05614	0.0743648	8.89333e-46	8.60443e-44	-1.04705	0.0745495
0.974515	0.749629	-0.830125	-0.894019	LPCAT4	254531	ENSG00000176454	15	34358633	34367196	lysophosphatidylcholine acyltransferase 4	-1.08472	0.0764841	1.17981e-45	1.13443e-43	-1.07554	0.0766862
0.921548	0.805245	-0.938968	-0.787825	PLAC8	51316	ENSG00000145287	4	83090048	83137075	placenta associated 8	-1.66728	0.117665	1.4098e-45	1.34726e-43	-1.65168	0.118018
0.833236	0.896148	-0.92491	-0.804474	EPS8L1	54869	ENSG00000131037	19	55072020	55087923	EPS8 like 1	-1.75779	0.124973	6.20197e-45	5.78492e-43	-1.74098	0.12541
0.891677	0.839233	-0.829555	-0.901354	C4BPB	725	ENSG00000123843	1	207088860	207099993	complement component 4 binding protein beta	-2	0.143224	2.57902e-44	2.39127e-42	-1.98022	0.143819
0.891449	0.840185	-0.857779	-0.873855	YPEL5	51646	ENSG00000119801	2	30146941	30160533	yippee like 5	-1.184	0.0849826	4.03215e-44	3.71649e-42	-1.17334	0.0852485
0.933516	0.794226	-0.914896	-0.812846	OAS1	4938	ENSG00000089127	12	112905856	112933219	2'-5'-oligoadenylate synthetase 1	-1.03727	0.0752599	3.25042e-43	2.94371e-41	-1.0281	0.0754508
0.996747	0.720383	-0.777092	-0.940038	CDHR2	54825	ENSG00000074276	5	176542511	176595974	cadherin related family member 2	-1.51068	0.109654	3.51666e-43	3.16642e-41	-1.49604	0.110075
-0.931782	-0.797022	0.897257	0.831546	MYB	4602	ENSG00000118513	6	135181308	135219173	MYB proto-oncogene, transcription factor	1.02174	0.0741725	3.59622e-43	3.21944e-41	1.01352	0.0744209
0.928024	0.799325	-0.926852	-0.800498	C6orf132	647024	ENSG00000188112	6	42092233	42142620	chromosome 6 open reading frame 132	-1.14436	0.0831487	4.26438e-43	3.79579e-41	-1.13383	0.0833781
0.984256	0.739088	-0.865739	-0.857605	GABRP	2568	ENSG00000094755	5	170763350	170814047	gamma-aminobutyric acid type A receptor subunit pi	-2.50882	0.183435	1.39606e-42	1.22171e-40	-2.48238	0.184043
0.860569	0.870883	-0.897509	-0.833943	CXCL1	2919	ENSG00000163739	4	73869393	73871308	C-X-C motif chemokine ligand 1	-2.12146	0.155808	3.22282e-42	2.75835e-40	-2.09927	0.156392
0.776933	0.95075	-0.86519	-0.862493	SOCS3	9021	ENSG00000184557	17	78356778	78360077	suppressor of cytokine signaling 3	-1.54272	0.113819	7.48558e-42	6.30286e-40	-1.5271	0.114312
0.839075	0.890067	-0.930784	-0.798357	LY6D	8581	ENSG00000167656	8	142784882	142786539	lymphocyte antigen 6 family member D	-3.01282	0.222555	9.40202e-42	7.87394e-40	-2.98024	0.222994
0.825786	0.902022	-0.787183	-0.940626	KIF21B	23046	ENSG00000116852	1	200969390	201023714	kinesin family member 21B	-1.55814	0.115449	1.6448e-41	1.36283e-39	-1.54218	0.11599
0.876416	0.854566	-0.907098	-0.823885	DKK1	22943	ENSG00000107984	10	52314281	52318042	dickkopf WNT signaling pathway inhibitor 1	-1.52142	0.11306	2.81281e-41	2.31827e-39	-1.50584	0.113478
1.03895	0.671333	-0.794402	-0.915876	RIOK3	8780	ENSG00000101782	18	23453287	23486603	RIO kinase 3	-1.1482	0.0854584	3.73166e-41	3.04336e-39	-1.13713	0.0857266
0.946657	0.781441	-0.867916	-0.860182	CYP2B6	1555	ENSG00000197408	19	40991282	41018398	cytochrome P450 family 2 subfamily B member 6	-2.29485	0.172179	1.58544e-40	1.265e-38	-2.26965	0.17283
0.962694	0.763546	-0.851552	-0.874687	SMIM14	201895	ENSG00000163683	4	39546336	39638902	small integral membrane protein 14	-1.06929	0.0806737	4.24802e-40	3.32519e-38	-1.05897	0.0809116
0.815566	0.91097	-0.778052	-0.948484	CXCL8	3576	ENSG00000169429	4	73740519	73743716	C-X-C motif chemokine ligand 8	-1.64046	0.123932	5.37915e-40	4.16871e-38	-1.62287	0.124561
0.805821	0.922952	-0.817043	-0.911731	NGEF	25791	ENSG00000066248	2	232878701	233013256	neuronal guanine nucleotide exchange factor	-1.50463	0.115122	4.89268e-39	3.73594e-37	-1.48831	0.11567
0.720063	1.00028	-0.884091	-0.836256	GPX8	493869	ENSG00000164294	5	55160167	55167297	glutathione peroxidase 8 (putative)	-1.2181	0.0934315	7.50541e-39	5.64791e-37	-1.20548	0.0938152
0.886532	0.844827	-0.838058	-0.893301	NRP2	8828	ENSG00000118257	2	205681990	205798133	neuropilin 2	-1.41014	0.108483	1.2452e-38	9.32521e-37	-1.39491	0.108939
0.890988	0.829504	-0.998114	-0.722379	ACSF2	80221	ENSG00000167107	17	50426158	50474845	acyl-CoA synthetase family member 2	-1.4318	0.110352	1.69728e-38	1.265e-36	-1.41617	0.110733
-0.76636	-0.956864	0.783022	0.940202	PGM5	5239	ENSG00000154330	9	68328308	68531061	phosphoglucomutase 5	2.25036	0.17407	3.13205e-38	2.31223e-36	2.22471	0.174429
0.780383	0.947556	-0.875231	-0.852708	OAS2	4939	ENSG00000111335	12	112978395	113011723	2'-5'-oligoadenylate synthetase 2	-1.81363	0.14041	3.62572e-38	2.66405e-36	-1.79288	0.141092
1.02367	0.689114	-0.928567	-0.784213	MMP28	79148	ENSG00000271447	17	35756249	35795707	matrix metallopeptidase 28	-2.14471	0.166381	5.09952e-38	3.71192e-36	-2.11972	0.166936
0.943289	0.7839	-0.90896	-0.818229	MIR22HG	84981	ENSG00000186594	17	1711447	1717174	MIR22 host gene	-1.97921	0.154501	1.4346e-37	1.0298e-35	-1.95599	0.155102
-0.853156	-0.875649	0.938503	0.790302	NT5DC3	51559	ENSG00000111696	12	103770453	103841234	5'-nucleotidase domain containing 3	1.0252	0.0800437	1.47839e-37	1.05637e-35	1.01496	0.080309
-0.822069	-0.908882	0.861105	0.869847	SLC7A8	23428	ENSG00000092068	14	23125295	23183674	solute carrier family 7 member 8	1.69274	0.132328	1.81688e-37	1.29231e-35	1.67352	0.132848
-0.931698	-0.78518	0.714223	1.00265	ALDH1B1	219	ENSG00000137124	9	38392702	38398661	aldehyde dehydrogenase 1 family member B1	1.17264	0.0919014	2.75138e-37	1.93055e-35	1.16043	0.0922826
0.801956	0.91605	-1.00382	-0.714185	TRIB3	57761	ENSG00000101255	20	362835	397559	tribbles pseudokinase 3	-1.19254	0.0935559	3.24569e-37	2.26718e-35	-1.17964	0.0938886
0.857882	0.873367	-0.902059	-0.82919	LINC01133	100505633	ENSG00000224259	1	159958035	159984750	long intergenic non-protein coding RNA 1133	-3.54104	0.279644	9.51772e-37	6.56006e-35	-3.49701	0.279945
-0.851837	-0.879691	0.892446	0.839082	UGT1A6	54578	ENSG00000167165	2	233691607	233773300	UDP glucuronosyltransferase family 1 member A6	1.28953	0.102422	2.38614e-36	1.6374e-34	1.27516	0.102843
-0.918084	-0.801184	0.723101	0.996168	LFNG	3955	ENSG00000106003	7	2512529	2529177	LFNG O-fucosylpeptide 3-beta-N-acetylglucosaminyltransferase	1.07912	0.0857708	2.67273e-36	1.81804e-34	1.06765	0.0860989
0.905927	0.818516	-0.968229	-0.756214	ITGB2	3689	ENSG00000160255	21	44885953	44931989	integrin subunit beta 2	-1.94975	0.156283	1.01271e-35	6.77036e-34	-1.92568	0.15688
-0.702019	-1.00642	0.986333	0.722106	UTP20	27340	ENSG00000120800	12	101280105	101386618	UTP20 small subunit processome component	1.07567	0.0862972	1.16339e-35	7.71154e-34	1.06417	0.086558
0.830999	0.893628	-0.753448	-0.971178	SLFN5	162394	ENSG00000166750	17	35243071	35273655	schlafen family member 5	-1.08041	0.0875787	5.76177e-35	3.75528e-33	-1.06829	0.0879451
1.0286	0.684636	-0.909764	-0.803477	MGLL	11343	ENSG00000074416	3	127689062	128052190	monoglyceride lipase	-1.02184	0.0831242	9.88484e-35	6.38905e-33	-1.01053	0.0833758
0.976355	0.743009	-0.950677	-0.768688	CYP4F12	66002	ENSG00000186204	19	15673018	15697174	cytochrome P450 family 4 subfamily F member 12	-2.03799	0.165931	1.12911e-34	7.26786e-33	-2.0119	0.16656
0.97011	0.752833	-0.924172	-0.798771	STEAP2	261729	ENSG00000157214	7	90167590	90238137	STEAP2 metalloreductase	-1.01522	0.0827613	1.36506e-34	8.75042e-33	-1.00396	0.083014
-0.852147	-0.876822	0.792496	0.936472	FSCN1	6624	ENSG00000075618	7	5592816	5606655	fascin actin-bundling protein 1	1.03858	0.0850061	2.50139e-34	1.55857e-32	1.02703	0.085301
0.80885	0.920549	-0.903049	-0.82635	ULBP1	80329	ENSG00000111981	6	149963943	149973715	UL16 binding protein 1	-3.23301	0.26534	3.76531e-34	2.33674e-32	-3.18961	0.266038
0.898597	0.832493	-0.84166	-0.88943	SYNPO	11346	ENSG00000171992	5	150601080	150659207	synaptopodin	-2.63771	0.216961	5.22999e-34	3.1948e-32	-2.60244	0.218005
1.04016	0.672075	-0.871784	-0.840456	TFPI	7035	ENSG00000003436	2	187464230	187565760	tissue factor pathway inhibitor	-1.05965	0.0871785	5.40181e-34	3.27409e-32	-1.04749	0.0874658
1.02208	0.682762	-0.986464	-0.718381	CTSE	1510	ENSG00000196188	1	206008535	206023909	cathepsin E	-1.04835	0.0866782	1.126e-33	6.79835e-32	-1.03625	0.0869528
0.912745	0.815034	-0.793153	-0.934625	PLEKHA7	144100	ENSG00000166689	11	16777297	17014414	pleckstrin homology domain containing A7	-1.03088	0.0852928	1.24695e-33	7.49951e-32	-1.01903	0.0856132
0.836367	0.895098	-0.853432	-0.878033	PTGES	9536	ENSG00000148344	9	129738331	129753042	prostaglandin E synthase	-2.57132	0.212975	1.46108e-33	8.72002e-32	-2.53649	0.214055
0.963937	0.757103	-0.769331	-0.951709	FGD6	55785	ENSG00000180263	12	95076749	95217482	FYVE, RhoGEF and PH domain containing 6	-1.05523	0.0875792	1.96732e-33	1.16521e-31	-1.04291	0.0879128
1.01662	0.700891	-0.871591	-0.845916	SSTR5-AS1	146336	ENSG00000261713	16	1064087	1078731	SSTR5 antisense RNA 1	-2.22262	0.185099	3.23499e-33	1.88028e-31	-2.19246	0.185936
0.828962	0.898204	-0.948738	-0.778427	IL33	90865	ENSG00000137033	9	6215786	6257983	interleukin 33	-1.22075	0.101899	4.5238e-33	2.60027e-31	-1.20565	0.102328
0.730402	0.991693	-0.87231	-0.849784	GADD45B	4616	ENSG00000099860	19	2476122	2478259	growth arrest and DNA damage inducible beta	-1.50266	0.125562	5.25742e-33	3.01084e-31	-1.48321	0.126258
0.883283	0.847601	-0.824183	-0.906701	ULK1	8408	ENSG00000177169	12	131894622	131923150	unc-51 like autophagy activating kinase 1	-1.28847	0.107774	6.09218e-33	3.47611e-31	-1.27232	0.108287
0.852943	0.879008	-0.864496	-0.867456	MUC20P1		ENSG00000224769	3	195614947	195620233		-3.19194	0.268667	1.49154e-32	8.418e-31	-3.14683	0.269606
0.775541	0.951888	-0.878534	-0.848895	SESN2	83667	ENSG00000130766	1	28259518	28282491	sestrin 2	-1.04987	0.0884384	1.67161e-32	9.33285e-31	-1.03719	0.0888066
0.920207	0.810027	-0.854577	-0.875656	SLCO3A1	28232	ENSG00000176463	15	91853708	92172435	solute carrier organic anion transporter family member 3A1	-1.67606	0.14174	2.90156e-32	1.6142e-30	-1.65343	0.142477
-0.759625	-0.955739	0.996059	0.719305	CHRM3	1131	ENSG00000133019	1	239386565	239915452	cholinergic receptor muscarinic 3	1.39393	0.118015	3.40569e-32	1.87457e-30	1.37598	0.118518
-0.979424	-0.744646	0.865463	0.858607	TRIP13	9319	ENSG00000071539	5	892884	919357	thyroid hormone receptor interactor 13	1.05152	0.090029	1.61725e-31	8.68687e-30	1.0388	0.090467
0.995356	0.725342	-0.823307	-0.897391	MTMR11	10903	ENSG00000014914	1	149928651	149936879	myotubularin related protein 11	-1.30671	0.112111	2.1506e-31	1.1512e-29	-1.28944	0.112632
0.880262	0.851659	-0.870394	-0.861528	ID4	3400	ENSG00000172201	6	19837370	19842197	inhibitor of DNA binding 4	-1.98051	0.170021	2.33157e-31	1.2438e-29	-1.95233	0.170957
0.757643	0.9676	-0.889973	-0.835269	STEAP4	79689	ENSG00000127954	7	88270892	88306894	STEAP4 metalloreductase	-4.10072	0.352278	2.56251e-31	1.36233e-29	-4.04032	0.352069
-0.8999	-0.829583	0.808087	0.921395	KREMEN1	83999	ENSG00000183762	22	29073035	29168333	kringle containing transmembrane protein 1	1.01746	0.0874798	2.87482e-31	1.52162e-29	1.00505	0.087838
0.787157	0.937983	-0.941681	-0.783459	TMEM139	135932	ENSG00000178826	7	143279957	143288048	transmembrane protein 139	-1.19604	0.102836	2.88167e-31	1.52162e-29	-1.18044	0.103307
0.797646	0.928494	-0.940142	-0.785998	IFI44	10561	ENSG00000137965	1	78649796	78664078	interferon induced protein 44	-1.81671	0.156265	3.04422e-31	1.60202e-29	-1.79104	0.157096
0.853706	0.877086	-0.910594	-0.820198	RNF39	80352	ENSG00000204618	6	30070266	30075849	ring finger protein 39	-1.36889	0.11816	4.90783e-31	2.52308e-29	-1.35036	0.118743
-0.862337	-0.869456	0.886723	0.84507	POLR3G	10622	ENSG00000113356	5	90471748	90514557	RNA polymerase III subunit G	1.47834	0.127778	5.87928e-31	3.01255e-29	1.45817	0.12847
0.856678	0.86704	-0.981741	-0.741977	CAV2	858	ENSG00000105971	7	116287380	116508541	caveolin 2	-1.12173	0.0970952	7.13989e-31	3.61098e-29	-1.10722	0.0974865
0.86457	0.866946	-0.896146	-0.83537	ADGRF4	221393	ENSG00000153294	6	47685864	47722021	adhesion G protein-coupled receptor F4	-3.83344	0.332	7.68856e-31	3.86338e-29	-3.77627	0.332036
0.855796	0.876085	-0.879754	-0.852127	GSDMB	55876	ENSG00000073605	17	39904595	39919854	gasdermin B	-1.34275	0.116325	7.9929e-31	4.00339e-29	-1.32452	0.116914
0.873256	0.856352	-0.929266	-0.800342	ABTB1	80325	ENSG00000114626	3	127672935	127680926	ankyrin repeat and BTB domain containing 1	-1.69673	0.147212	9.78697e-31	4.88627e-29	-1.67257	0.147969
0.801238	0.928163	-0.888343	-0.841057	DENND3	22898	ENSG00000105339	8	141117278	141195808	DENN domain containing 3	-1.77149	0.15383	1.09654e-30	5.43973e-29	-1.74606	0.154726
0.934323	0.791751	-0.935513	-0.790561	IFI27	3429	ENSG00000165949	14	94104836	94116695	interferon alpha inducible protein 27	-2.49428	0.217057	1.45822e-30	7.18822e-29	-2.45713	0.217948
0.96054	0.754377	-0.719964	-0.994952	BDKRB2	624	ENSG00000168398	14	96204679	96244166	bradykinin receptor B2	-2.00268	0.174492	1.71704e-30	8.43734e-29	-1.97321	0.175709
1.02624	0.68889	-0.884124	-0.831011	CEACAM6	4680	ENSG00000086548	19	41750977	41772211	CEA cell adhesion molecule 6	-1.79333	0.156439	2.01239e-30	9.79592e-29	-1.7674	0.157396
0.974093	0.748611	-0.919959	-0.802745	KDM7A	80853	ENSG00000006459	7	140084746	140176983	lysine demethylase 7A	-1.37822	0.120313	2.21152e-30	1.07317e-28	-1.35912	0.120863
1.00334	0.716793	-0.866533	-0.853602	BHLHE41	79365	ENSG00000123095	12	26120030	26125037	basic helix-loop-helix family member e41	-1.60525	0.140882	4.46508e-30	2.14008e-28	-1.58206	0.141608
0.809407	0.920724	-0.850076	-0.880055	CSRNP1	64651	ENSG00000144655	3	39141855	39154562	cysteine and serine rich nuclear protein 1	-1.0139	0.0891736	5.89967e-30	2.81037e-28	-1.0008	0.0895567
-0.806729	-0.906889	1.02783	0.685786	PARM1	25849	ENSG00000169116	4	74933095	75050115	prostate androgen-regulated mucin-like protein 1	1.29735	0.114911	1.46901e-29	6.95526e-28	1.27932	0.115498
0.824825	0.902544	-0.782524	-0.944845	ZBED2	79413	ENSG00000177494	3	111592900	111595346	zinc finger BED-type containing 2	-2.16245	0.191562	1.49522e-29	7.05787e-28	-2.12931	0.192931
1.06484	0.636112	-0.764321	-0.936634	PDZK1IP1	10158	ENSG00000162366	1	47183582	47191044	PDZK1 interacting protein 1	-3.09573	0.275013	2.14807e-29	9.9882e-28	-3.04681	0.276707
0.870151	0.85648	-0.766745	-0.959886	IL22RA1	58985	ENSG00000142677	1	24119771	24143140	interleukin 22 receptor subunit alpha 1	-1.19143	0.106083	2.86895e-29	1.32023e-27	-1.17479	0.106649
0.981412	0.738239	-0.941177	-0.778474	ATP10B	23120	ENSG00000118322	5	160563120	160852214	ATPase phospholipid transporting 10B (putative)	-1.50482	0.134183	3.4544e-29	1.58262e-27	-1.48262	0.134834
0.816422	0.902546	-1.00343	-0.71554	PNRC1	10957	ENSG00000146278	6	89080751	89085160	proline rich nuclear receptor coactivator 1	-1.1389	0.101607	3.69016e-29	1.68568e-27	-1.12352	0.102055
1.03965	0.672755	-0.869585	-0.842821	BCAS1	8537	ENSG00000064787	20	53936777	54070594	brain enriched myelin associated protein 1	-2.48118	0.22198	5.25637e-29	2.38713e-27	-2.44208	0.2231
0.698096	1.01562	-0.93679	-0.776923	JDP2	122953	ENSG00000140044	14	75427716	75474111	Jun dimerization protein 2	-1.53686	0.137664	6.1278e-29	2.75875e-27	-1.51383	0.138503
0.960713	0.762935	-0.930674	-0.792974	SDR16C5	195814	ENSG00000170786	8	56300005	56320776	short chain dehydrogenase/reductase family 16C member 5	-1.07619	0.0965725	7.67143e-29	3.42401e-27	-1.06143	0.0969608
-0.749051	-0.974046	0.914585	0.808512	IL17RD	54756	ENSG00000144730	3	57089982	57170306	interleukin 17 receptor D	1.05262	0.0946201	9.51434e-29	4.23442e-27	1.03843	0.0949784
0.814955	0.915548	-0.877514	-0.852989	ALDH3B1	221	ENSG00000006534	11	68008578	68029282	aldehyde dehydrogenase 3 family member B1	-1.34638	0.121143	1.07275e-28	4.76075e-27	-1.32658	0.121829
0.933193	0.795729	-0.838175	-0.890747	GPRC5C	55890	ENSG00000170412	17	74424851	74451653	G protein-coupled receptor class C group 5 member C	-1.11547	0.100439	1.17366e-28	5.17908e-27	-1.09984	0.100903
0.908321	0.817057	-0.95991	-0.765469	PLAAT4	5920	ENSG00000133321	11	63536808	63546462	phospholipase A and acyltransferase 4	-1.687	0.152118	1.40171e-28	6.16792e-27	-1.66107	0.152915
-0.88646	-0.845327	0.860029	0.871758	SLCO4A1-AS1	100127888	ENSG00000232803	20	62663019	62666724	SLCO4A1 antisense RNA 1	1.78116	0.16085	1.68912e-28	7.39083e-27	1.75386	0.161927
0.980817	0.742135	-0.823058	-0.899894	QPCT	25797	ENSG00000115828	2	37342827	37373322	glutaminyl-peptide cyclotransferase	-1.51876	0.137776	2.94646e-28	1.27492e-26	-1.49551	0.138573
0.917697	0.811042	-0.810633	-0.918105	ALOX5	240	ENSG00000012779	10	45374176	45446119	arachidonate 5-lipoxygenase	-1.70124	0.154501	3.37468e-28	1.45616e-26	-1.67459	0.155493
0.981837	0.741876	-0.865218	-0.858495	SH3D21	79729	ENSG00000214193	1	36306368	36329340	SH3 domain containing 21	-1.30494	0.118647	3.88612e-28	1.66761e-26	-1.28555	0.119251
0.783704	0.943653	-0.905188	-0.822169	GRB10	2887	ENSG00000106070	7	50590063	50793462	growth factor receptor bound protein 10	-1.15176	0.104822	4.37811e-28	1.87356e-26	-1.13512	0.105361
0.701968	1.01374	-0.795592	-0.920114	IFIT3	3437	ENSG00000119917	10	89327307	89377473	interferon induced protein with tetratricopeptide repeats 3	-1.37627	0.125395	5.01284e-28	2.13347e-26	-1.3554	0.126237
0.881746	0.848573	-0.917345	-0.812974	NFKB2	4791	ENSG00000077150	10	102394110	102402524	nuclear factor kappa B subunit 2	-1.29156	0.118721	1.45193e-27	6.07976e-26	-1.27196	0.119349
0.963087	0.762613	-0.832301	-0.893398	NYNRIN	57523	ENSG00000205978	14	24399003	24419283	NYN domain and retroviral integrase containing	-1.85547	0.171154	2.20162e-27	9.16968e-26	-1.82514	0.172247
0.855793	0.873494	-0.933229	-0.796059	CXCL2	2920	ENSG00000081041	4	74097040	74099196	C-X-C motif chemokine ligand 2	-2.10709	0.194418	2.27522e-27	9.45095e-26	-2.07223	0.195545
0.912486	0.815072	-0.937253	-0.790305	OCLN	100506658	ENSG00000197822	5	69492292	69558104	occludin	-1.16713	0.107888	2.82782e-27	1.17151e-25	-1.14973	0.108402
0.920038	0.806735	-0.786455	-0.940318	P2RY2	5029	ENSG00000175591	11	73218281	73242427	purinergic receptor P2Y2	-1.39323	0.129446	5.14476e-27	2.0979e-25	-1.37121	0.130254
0.911577	0.818924	-0.888455	-0.842045	HLA-DMA	3108	ENSG00000204257	6	32948613	32969094	major histocompatibility complex, class II, DM alpha	-1.3434	0.124855	5.33777e-27	2.17093e-25	-1.32235	0.125552
0.867722	0.864278	-0.856759	-0.875241	DAPP1	27071	ENSG00000070190	4	99816827	99870190	dual adaptor of phosphotyrosine and 3-phosphoinositides 1	-3.35701	0.31427	1.23698e-26	4.91541e-25	-3.2982	0.315444
0.940585	0.787332	-0.828181	-0.899735	BNIP5	389384	ENSG00000189325	6	36315761	36336888	BCL2 interacting protein 5	-3.94305	0.36934	1.319e-26	5.22802e-25	-3.87378	0.369819
-0.736702	-0.983436	0.786978	0.933161	HAS3	3038	ENSG00000103044	16	69105653	69118719	hyaluronan synthase 3	1.05796	0.0997759	2.87496e-26	1.1085e-24	1.04225	0.100176
-0.729988	-0.98302	0.9861	0.726909	NKD1	85407	ENSG00000140807	16	50548396	50649249	NKD inhibitor of WNT signaling pathway 1	1.77604	0.167571	3.0199e-26	1.16151e-24	1.74643	0.168427
0.955692	0.771448	-0.866083	-0.861058	FRMD4B	23150	ENSG00000114541	3	69168782	69542583	FERM domain containing 4B	-1.20135	0.113443	3.31833e-26	1.27002e-24	-1.18249	0.114039
0.807674	0.919878	-0.931847	-0.795705	ELFN2	114794	ENSG00000166897	22	37367960	37427479	extracellular leucine rich repeat and fibronectin type III domain containing 2	-1.84387	0.174406	4.00675e-26	1.52227e-24	-1.81237	0.175547
-0.896265	-0.835247	0.86722	0.864292	SLC19A1	6573	ENSG00000173638	21	45493572	45573365	solute carrier family 19 member 1	1.17128	0.110823	4.15422e-26	1.57446e-24	1.15314	0.11147
0.90654	0.822613	-0.807524	-0.921628	KRT15	3866	ENSG00000171346	17	41513745	41522529	keratin 15	-1.23831	0.117214	4.3533e-26	1.64192e-24	-1.21857	0.117903
-0.825191	-0.905882	0.857365	0.873707	PALD1	27143	ENSG00000107719	10	70478767	70568450	phosphatase domain containing paladin 1	1.09166	0.103357	4.46978e-26	1.68178e-24	1.0751	0.103857
0.898747	0.832488	-0.883342	-0.847894	UGT2B7	7364	ENSG00000171234	4	69051363	69112987	UDP glucuronosyltransferase family 2 member B7	-1.657	0.156944	4.66914e-26	1.75256e-24	-1.6289	0.157955
0.90125	0.828786	-0.818384	-0.911652	B3GNT7	93010	ENSG00000156966	2	231395710	231401164	UDP-GlcNAc:betaGal beta-1,3-N-acetylglucosaminyltransferase 7	-1.7338	0.164302	4.94298e-26	1.84645e-24	-1.70413	0.165458
0.772278	0.947707	-0.745398	-0.974587	NHSL1	57224	ENSG00000135540	6	138422043	138692571	NHS like 1	-1.06317	0.100891	5.78536e-26	2.14568e-24	-1.04665	0.10147
0.916127	0.812482	-0.921482	-0.807128	CYP4F11	57834	ENSG00000171903	19	15912367	15934867	cytochrome P450 family 4 subfamily F member 11	-1.20205	0.114301	7.24543e-26	2.67446e-24	-1.18292	0.1149
0.876315	0.854987	-0.831266	-0.900036	TNFRSF14	8764	ENSG00000157873	1	2555639	2565382	TNF receptor superfamily member 14	-1.1531	0.110358	1.48506e-25	5.40487e-24	-1.13471	0.11098
0.944372	0.783912	-0.855148	-0.873135	IKZF2	22807	ENSG00000030419	2	212999691	213152427	IKAROS family zinc finger 2	-1.34008	0.128941	2.66947e-25	9.55915e-24	-1.31756	0.129721
0.761536	0.964219	-0.887655	-0.8381	CAVIN1	284119	ENSG00000177469	17	42402449	42423256	caveolae associated protein 1	-1.1279	0.108616	2.92343e-25	1.04206e-23	-1.10976	0.109244
1.00148	0.710051	-0.974503	-0.737027	FAM3D	131177	ENSG00000198643	3	58633946	58666834	FAM3 metabolism regulating signaling molecule D	-1.66269	0.160705	4.35475e-25	1.53471e-23	-1.63339	0.16163
1.0498	0.65792	-0.912607	-0.795114	PTPRH	5794	ENSG00000080031	19	55181247	55209506	protein tyrosine phosphatase receptor type H	-2.2367	0.216506	5.10725e-25	1.78777e-23	-2.19573	0.217769
0.788349	0.924613	-1.02452	-0.688438	KLF2	10365	ENSG00000127528	19	16324826	16328685	KLF transcription factor 2	-1.27182	0.123418	6.69396e-25	2.3327e-23	-1.25038	0.124131
0.883754	0.847964	-0.881889	-0.849828	TRIM22	10346	ENSG00000132274	11	5689697	5737089	tripartite motif containing 22	-1.34171	0.130247	6.94897e-25	2.41545e-23	-1.31876	0.131063
0.958814	0.767067	-0.901374	-0.824506	ALPK3	57538	ENSG00000136383	15	84817356	84873479	alpha kinase 3	-1.6312	0.158515	7.77311e-25	2.69071e-23	-1.60215	0.159529
0.899318	0.831382	-0.89976	-0.830941	LRRC75A	388341	ENSG00000181350	17	16441577	16492193	leucine rich repeat containing 75A	-1.29713	0.126371	1.01905e-24	3.51191e-23	-1.27495	0.127133
[truncated: 524 more rows]

## Sheet: AllData_Metastasis
CT1B	CT2B	K1B	K2B	MCT1	MCT2	MCT3	MK1	MK2	MK3	gene_name	Entrez	gene_id	chrom	start	end	gene_description	log2FoldChange KOvsCT_inMetast	lfcSE KOvsCT_inMetast	P_Value KOvsCT_inMetast	Adjusted_P_Value KOvsCT_inMetast	Shrunken_lFC KOvsCT_inMetast	Shrunken_lFCSE KOvsCT_inMetast	log2FoldChange METvsPRIM_inCT	lfcSE METvsPRIM_inCT	P_Value METvsPRIM_inCT	Adjusted_P_Value METvsPRIM_inCT	Shrunken_lFC METvsPRIM_inCT	Shrunken_lFCSE METvsPRIM_inCT	log2FoldChange METvsPRIM_inKO	lfcSE METvsPRIM_inKO	P_Value METvsPRIM_inKO	Adjusted_P_Value METvsPRIM_inKO	Shrunken_lFC METvsPRIM_inKO	Shrunken_lFCSE METvsPRIM_inKO
[truncated: 23,036 more rows]

[truncated: 3 more sheets: DEGs_IKKa_KOvsCT_in_Met, DEGs_Met_vs_Prim_inCT, DEGs_Met_vs_Prim_in_IKKa_KO]
