# Supplementary material for: Tight Junction-high and CDH17-positive cell population is the Source of Colorectal Cancer Liver Metastases
Source: Research Square preprint supplement (doi:10.21203/rs.3.rs-6998644/v1), 2025-07-09
Supplement: Supplementary file 4 [file bf2adac5e182d2cfe46de590.xlsx]

## Sheet: METS_PRIM WT
pathway	pval	padj	log2err	ES	NES	size	leadingEdge
Cluster_1_top50	3.31988e-05	8.85301e-05	0.557332	-0.705863	-1.99649	43	PTCHD4, SRGAP3, ARHGAP24, RUNX2, LINC02331, ADAMTS14, GDF15, DRAM1, PLK2, PTPN14, FAM169A, RGL1, PSTPIP2, ZMAT3, MCC, MGAT5, LINC02832, RRM2B, PRDM1, GLIS3
Cluster_2_top50	0.0225676	0.0257915	0.139715	-0.523977	-1.51787	48	GLI2, LINC01239, SLC14A1, TGFB2, ITGB2, MUC5AC, PHACTR3, ADGRF1, ALDH1A3, NRP1, ANO1, ST3GAL4, SPON1, LRRC8A, PRNP, ARHGAP29
Cluster_3_top50	1.38002e-08	5.52009e-08	0.74774	-0.796356	-2.26192	44	ADAMTS19, CHRM3, PDZRN3, HOMER2, PTK7, CACHD1, MYRIP, ADAMTS6, TMEM150C, PROX1, KLF12, SMOC2, COLGALT2, PRDM16, NKD1, LRIG1, SLC38A11, TRAF5, KREMEN1, NSMF, LGR5, CDCA7, STARD13
Cluster_4_top50	0.136966	0.136966	0.0546948	-0.449532	-1.27147	43	EGR3, FOSB, NR4A1, EGR1, GAS7, HBEGF, ATF3, FOS, TRIB1
Cluster_5_top50	0.00848536	0.0135766	0.229089	-0.561987	-1.64368	50	DEPDC1, CENPF, ASPM, KIF20B, HMMR, NCAPD2, CENPE, MKI67, PSRC1, PRR11, PIMREG, BUB1, SGO1, NUF2, HMGB2, TPX2, SPAG5, AURKA, DLGAP5, FOXM1, CKS2, STMN1, KIF2C, CCNB2, NEK2
Cluster_6_top50	0.000228555	0.000457109	0.518848	-0.646045	-1.88953	50	BRCA2, DMC1, MIR924HG, BRIP1, XRCC2, RAD54L, ZGRF1, BLM, E2F7, DDIAS, KNTC1, WDHD1, MCM2, MCM10, ORC1, DTL, CENPP, MCM6, BRCA1, GINS4, FANCI, CENPU, DSCC1, ZNF367, E2F1, EXO1, CDT1, CHAF1A, TP73, CDC6, WDR76, GINS1, FANCA, CLSPN
Cluster_7_top50	0.0209701	0.0257915	0.144646	-0.549098	-1.54562	42	NEIL3, KIF14, TOP2A, CDCA2, CKAP2L, KIF15, TTK, CENPI, FAM83D, KIF18B, KIF23, DIAPH3, ESPL1, CDC25C, HJURP, KIF2C, AURKB, PIF1, KIF4A, NDC80, NCAPG, CDK1, ESCO2, KIFC1, NCAPH, KIF20A, PBK, SKA1
Cluster_8_top50	1.21886e-09	9.75089e-09	0.788187	0.814543	2.29015	47	C15orf48, SLC6A8, NDRG1, EGLN3, CA9, HIF1A-AS3, TFF1, MIR210HG, TFF3, PTPRR, HSD17B2, MYO7B, NPSR1, LINC02649, ERO1A, GAL3ST1, NCKAP5, PTPRB, PTPN22, CDA, SMIM24, ADM, ANKRD37, P4HA1, PLOD2, PAG1, LDHA, STS, TPI1, SLC15A1, PGK1, FUT11, BHLHE40, ALDOC, LINC01559, RAB3B, SEMA4B, SLC2A1, RIMKLA

## Sheet: METS_PRIM KO
pathway	pval	padj	log2err	ES	NES	size	leadingEdge
Cluster_1_top50	0.00070068	0.00112109	0.477271	-0.614738	-1.84919	43	PTCHD4, ARHGAP24, ADAMTS14, SRGAP3, RUNX2, LINC02331, MGAT5, RGL1, PLK2, PTPN14, DRAM1, PURPL, GRIN2B, FAM169A, MCC, PRDM1, ZMAT3, PSTPIP2, GDF15, RRM2B, MDM2
Cluster_2_top50	0.0525067	0.0600077	0.0779135	0.506003	1.41511	48	TFF1, BCAS1, PLAC8, TFF3, MMP28, CTSE, PCED1B, BHLHE41, CREB3L1, S100P, F3, NTN4, AMIGO2, DHRS3, VSIR, MLPH, TFF2, ALS2CL, THSD4, TACSTD2, LPCAT4, CAV2
Cluster_3_top50	6.03143e-13	4.82515e-12	0.921426	-0.847398	-2.56473	44	SMOC2, PDZRN3, CHRM3, ADAMTS19, HOMER2, CACHD1, PROX1, ADAMTS6, TMEM150C, MYRIP, NKD1, PRDM16, PTK7, SLC38A11, LRIG1, KLF12, LGR5, COLGALT2, KREMEN1, TRAF5, CDCA7, NSMF, STARD13, CXCR4, CEMIP, CCSER2, NEK5, ITPR2, SYNPR-AS1, SP5, VWA2, SLC9A3-AS1
Cluster_4_top50	0.50589	0.50589	0.0213516	0.354434	0.972542	43	CD55, AVIL, SGMS2, KLF2, RHOB, CDRT1, ZNF487, RHPN2, TUFT1, MOK, ID1, WNT2B, SYTL3, KLF6, DUSP1, JUNB, AGPAT4, IL6R, SAMD4A, LINC01909
Cluster_5_top50	3.80353e-05	7.60706e-05	0.557332	-0.657639	-2.04119	50	CENPF, DEPDC1, ASPM, MKI67, KIF20B, BUB1, NCAPD2, FOXM1, HMMR, CENPE, PIMREG, DLGAP5, PSRC1, STMN1, PRR11, SPAG5, SAPCD2, MAD2L1, CKS2, TPX2, CDKN3, AURKA, SGO1, NUF2, CCNB1, CDC20, HMGB2, KIF4A, CCNA2, KIF2C, PBK, TUBA1B, UBE2S, PLK1, CCNB2, PRC1, BIRC5, NEK2
Cluster_6_top50	1.21114e-08	3.2297e-08	0.74774	-0.753184	-2.33775	50	BRCA2, RAD54L, DDIAS, ORC1, MCM10, MCM2, WDHD1, ZGRF1, DTL, CLSPN, E2F7, EXO1, BLM, MIR924HG, XRCC2, BRCA1, BRIP1, DMC1, MCM6, CDC6, DSCC1, GINS4, KNTC1, ZNF367, UHRF1, CHAF1A, CENPP, FANCI, GINS3, FANCA, GINS2, WDR76, CDT1, ORC6, E2F1, MCM5, GINS1, CCNE2, PSMC3IP, CDC45
Cluster_7_top50	0.00127321	0.00169762	0.45506	-0.600846	-1.79617	42	TOP2A, KIF14, KIF15, CDCA2, TTK, CENPI, FAM83D, ESCO2, NEIL3, KIF18B, CKAP2L, DIAPH3, HJURP, NCAPH, KIFC1, ESPL1, KIF20A, NCAPG, KIF23, AURKB, KIF4A, SHCBP1, CCNA2, CDK1, IQGAP3, KIF2C, KIF11, PBK, PLK1, CDCA5
Cluster_8_top50	1.91932e-10	7.67727e-10	0.826657	0.82487	2.29667	47	C15orf48, NDRG1, MIR210HG, SLC6A8, TFF1, HIF1A-AS3, PTPRR, CA9, HSD17B2, EGLN3, LINC02649, TFF3, MYO7B, NCKAP5, ADM, SLC15A1, PAG1, CDA, GAL3ST1, ANKRD37, SMIM24, NPSR1, PTPRB, ERO1A, BHLHE40, PTPN22, LINC01559, PLOD2, RAB3B, P4HA1, NDNF, SEMA4B, ALDOC, TFF2, BNIP3L, STS, LDHA, PGK1, SLC2A1, RIMKLA, FUT11, TPI1
